# Supplementary material for: Distinct and diverse chromatin proteomes of ageing mouse organs reveal protein signatures that correlate with physiological functions
Source: eLife journal article supplement (doi:10.7554/elife.73524), 2022-03-08
Supplement: supp [file elife-73524-supp-v1.zip]

Figure 7- source data 2- HEART

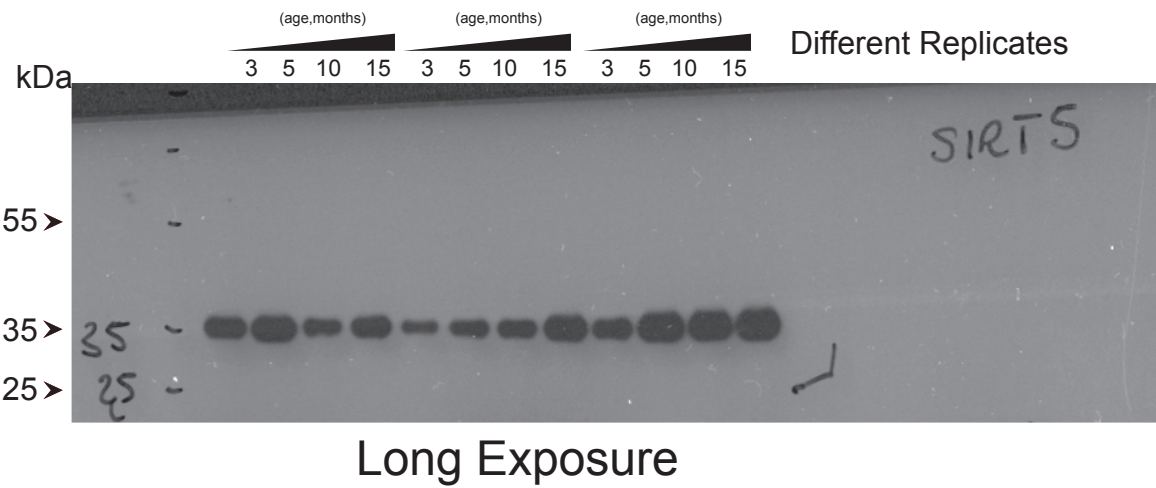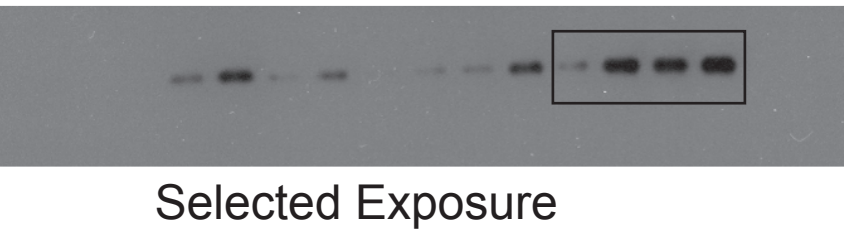

IB: SIRT5

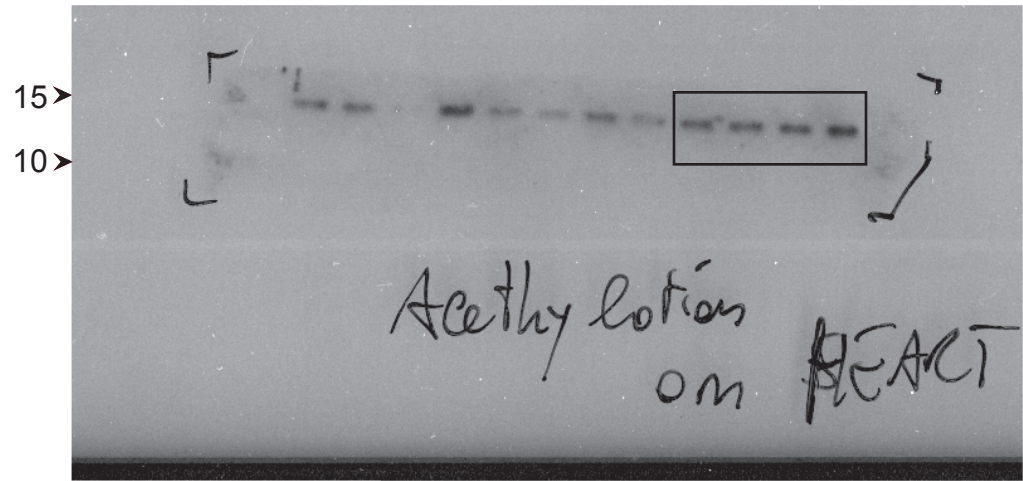

IB:Ac-H3

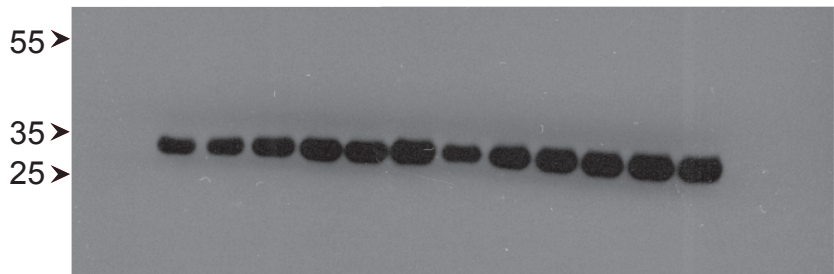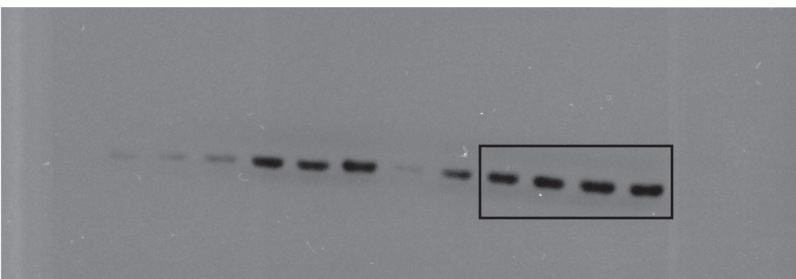

IB: SIRT3

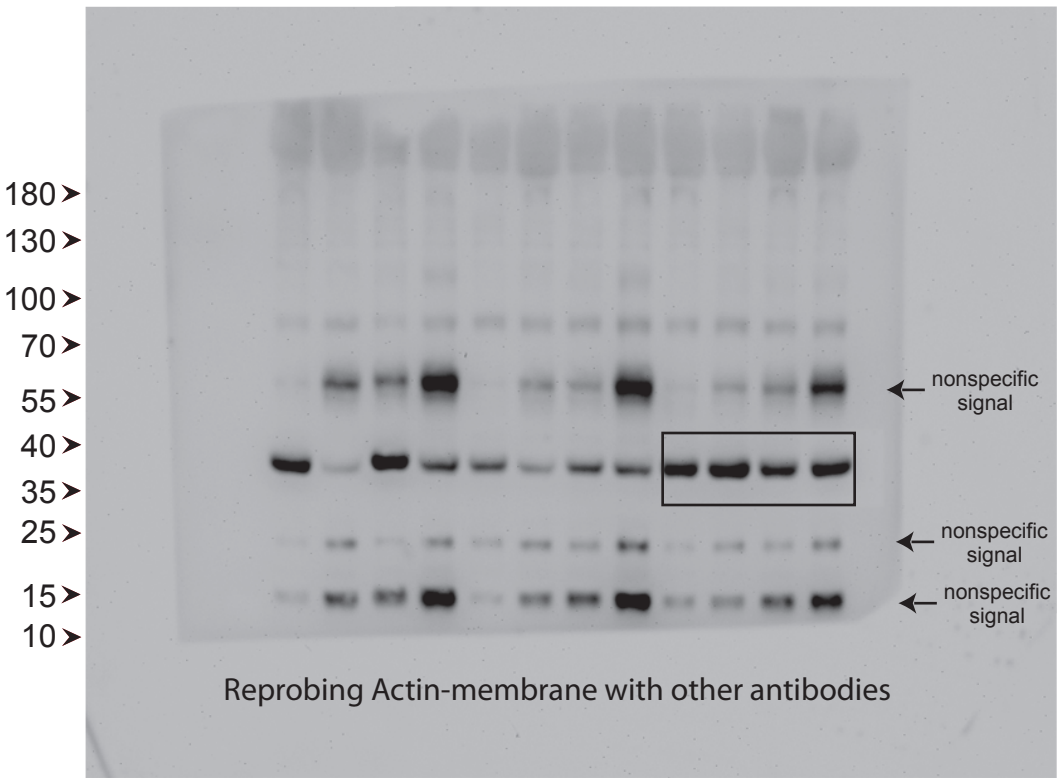

IB: B-ACTIN

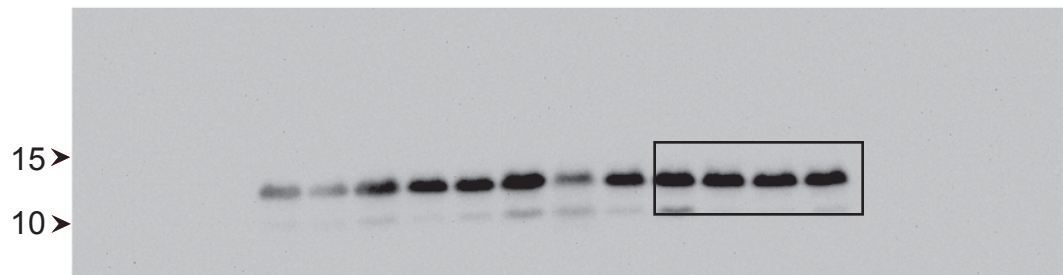

IB: H3

NuPAGE Gel: 4 to 12%
