# Supplementary material for: Distinct and diverse chromatin proteomes of ageing mouse organs reveal protein signatures that correlate with physiological functions
Source: eLife journal article supplement (doi:10.7554/elife.73524), 2022-03-08
Supplement: supp [file elife-73524-supp-v1.zip]

Archive with 18 entries (18 files):
- elife_poa_e73524_Figure_1_figure_supplement_1.pdf
- elife_poa_e73524_Figure_1_figure_supplement_2.pdf
- elife_poa_e73524_Figure_3_figure_supplement_1.pdf
- elife_poa_e73524_Figure_5_figure_supplement_1.pdf
- elife_poa_e73524_Figure_5_figure_supplement_2.pdf
- elife_poa_e73524_Supplementary_file_1.xlsx
- elife_poa_e73524_Supplementary_file_2.xlsx
- elife_poa_e73524_Supplementary_file_3.xlsx
- elife_poa_e73524_Supplementary_file_4.xlsx
- elife_poa_e73524_Supplementary_file_5.xlsx
- elife_poa_e73524_Transparent_Reporting_File.pdf
- elife_poa_e73524_Figure_1_source_data_1.pdf
- elife_poa_e73524_Figure_1_figure_supplement_2_source_data_1.pdf
- elife_poa_e73524_Figure_7_source_data_1.pdf
- elife_poa_e73524_Figure_7_source_data_2.pdf
- elife_poa_e73524_Figure_7_source_data_3.pdf
- elife_poa_e73524_Figure_7_source_data_4.pdf
- elife_poa_e73524_Souce_data_1.zip
