# Supplementary material for: Distinct and diverse chromatin proteomes of ageing mouse organs reveal protein signatures that correlate with physiological functions
Source: eLife journal article supplement (doi:10.7554/elife.73524), 2022-03-08

Figure 7- source data 4 - LIVER

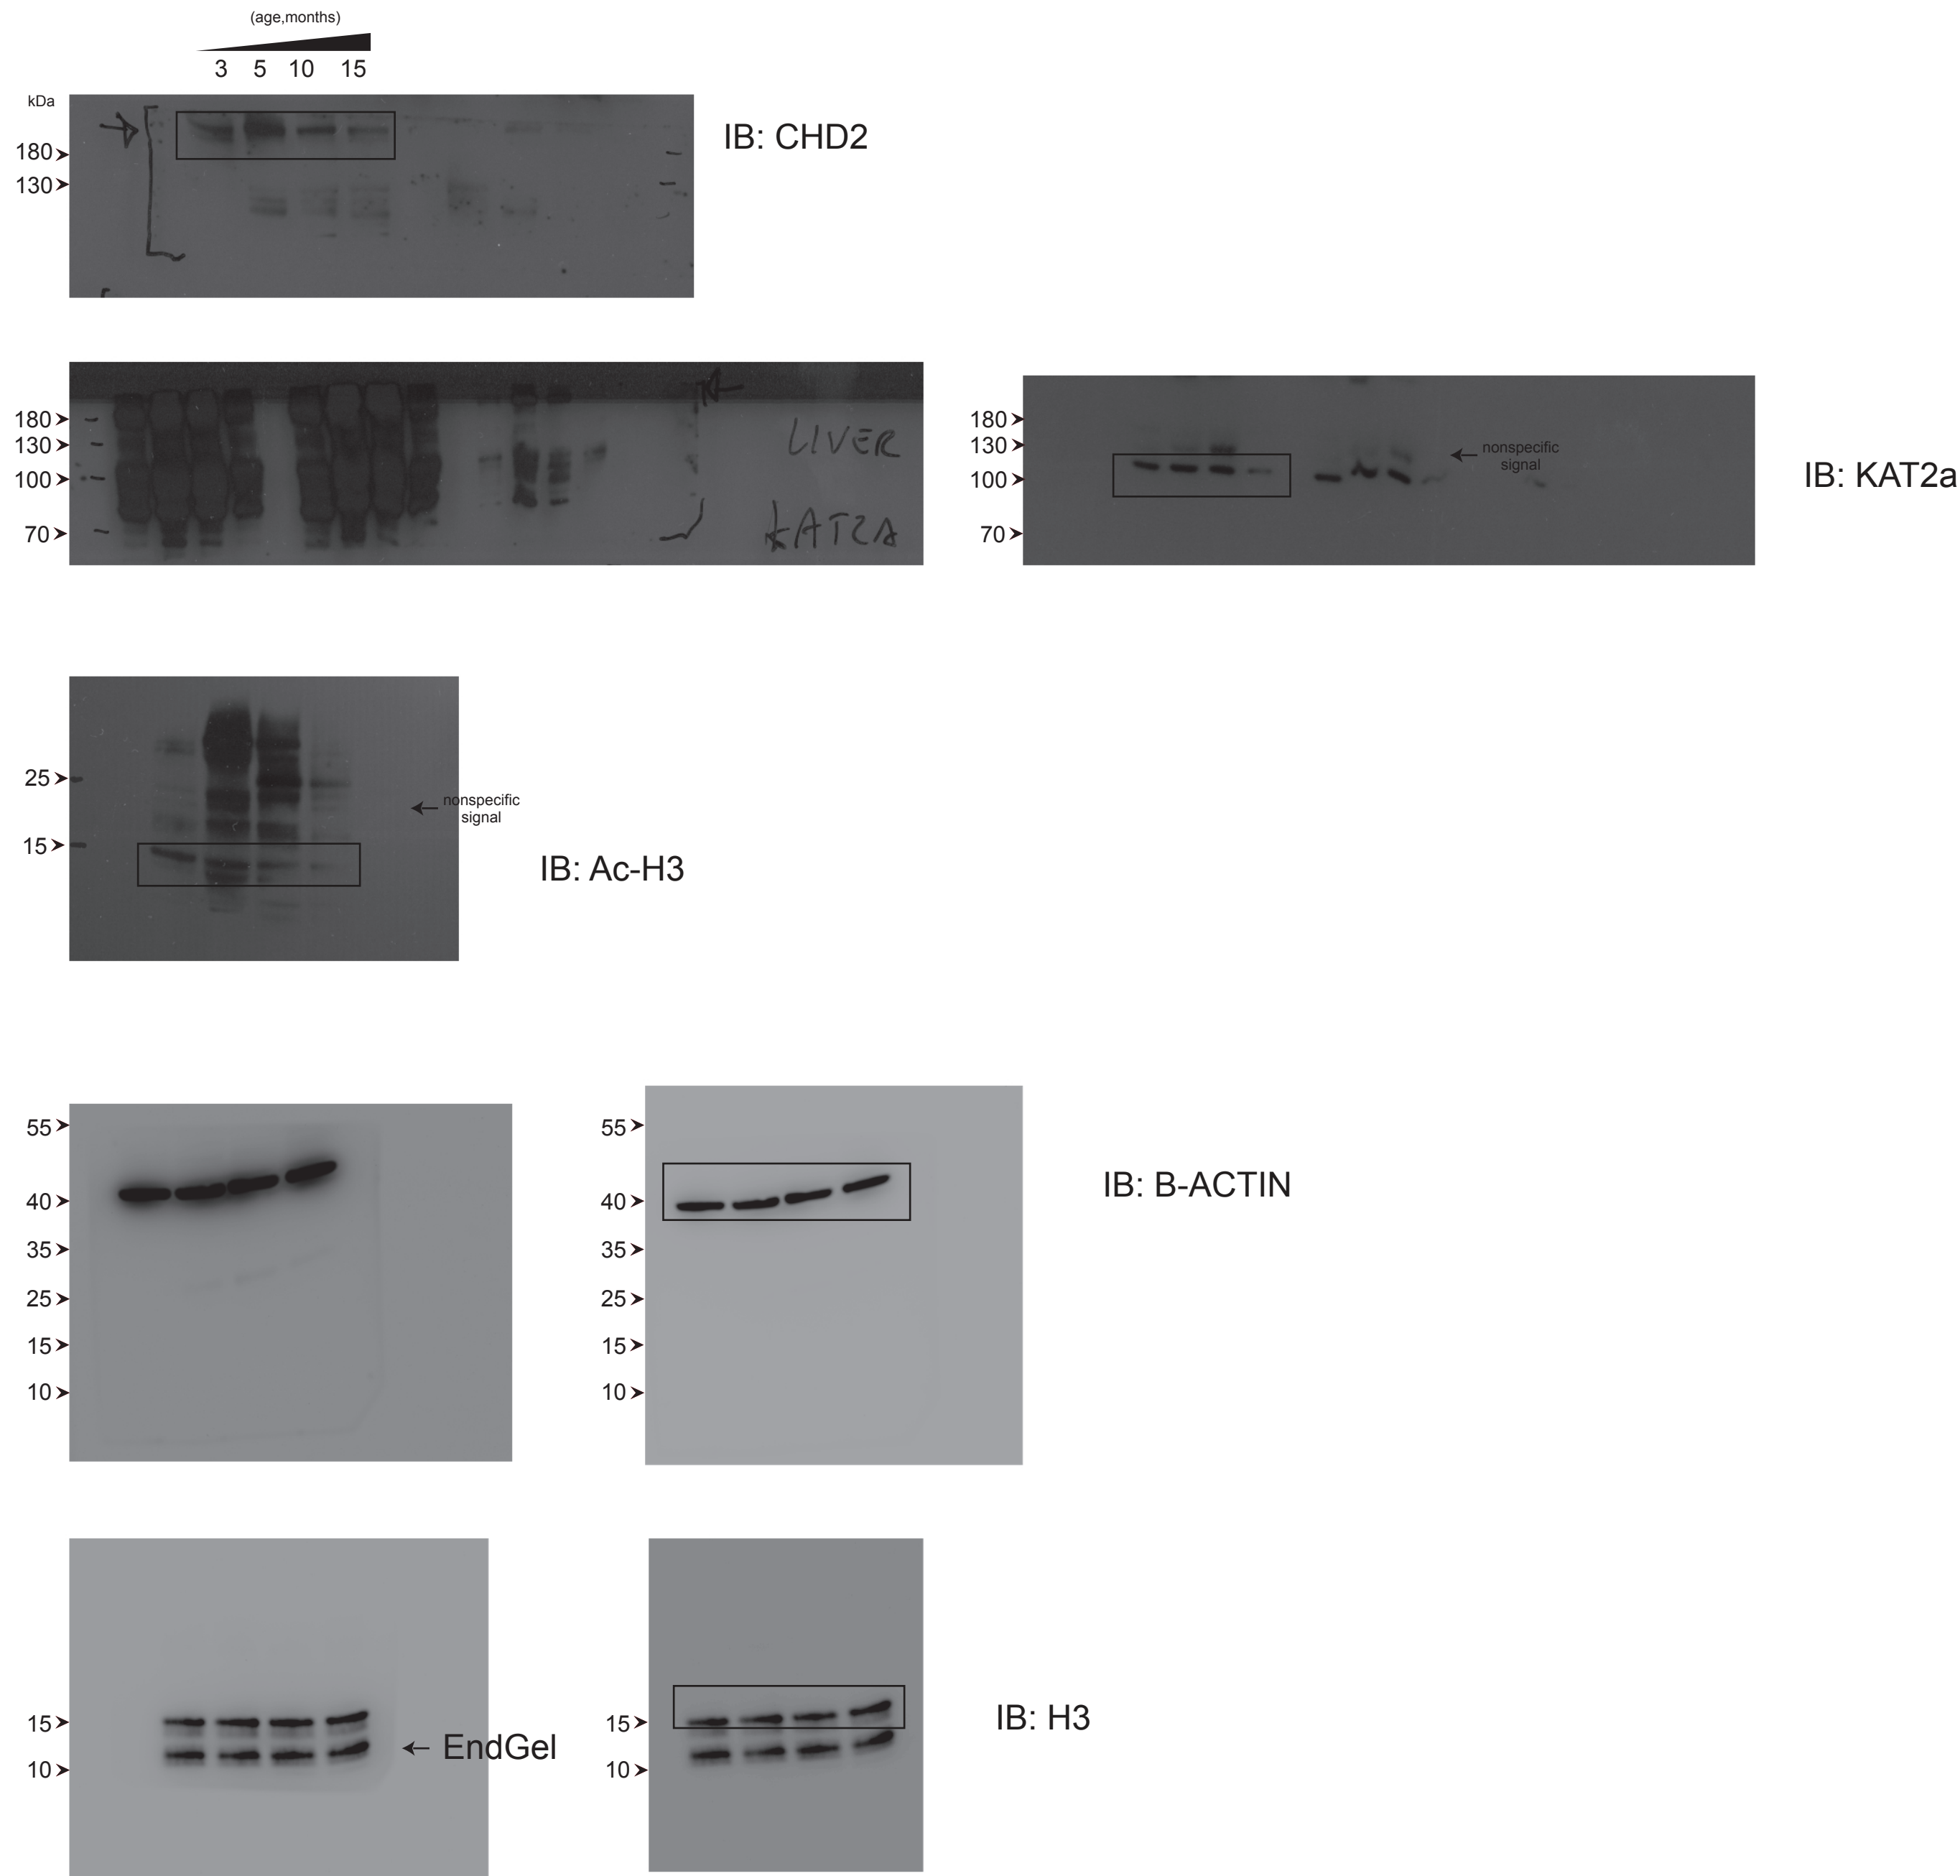

Supplement: supp [file elife-73524-supp-v1.zip]
