# Supplementary material for: Distinct and diverse chromatin proteomes of ageing mouse organs reveal protein signatures that correlate with physiological functions
Source: eLife journal article supplement (doi:10.7554/elife.73524), 2022-03-08

Library:  
Chromatin Associated Protein:

- different eukaryote species (2016)
- mouse embryonic stem cells (2015)
- different human cell lines (2015)
- *in this study* (2020)
- different mouse embryonic stem cells (2019)

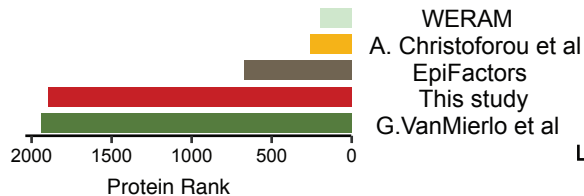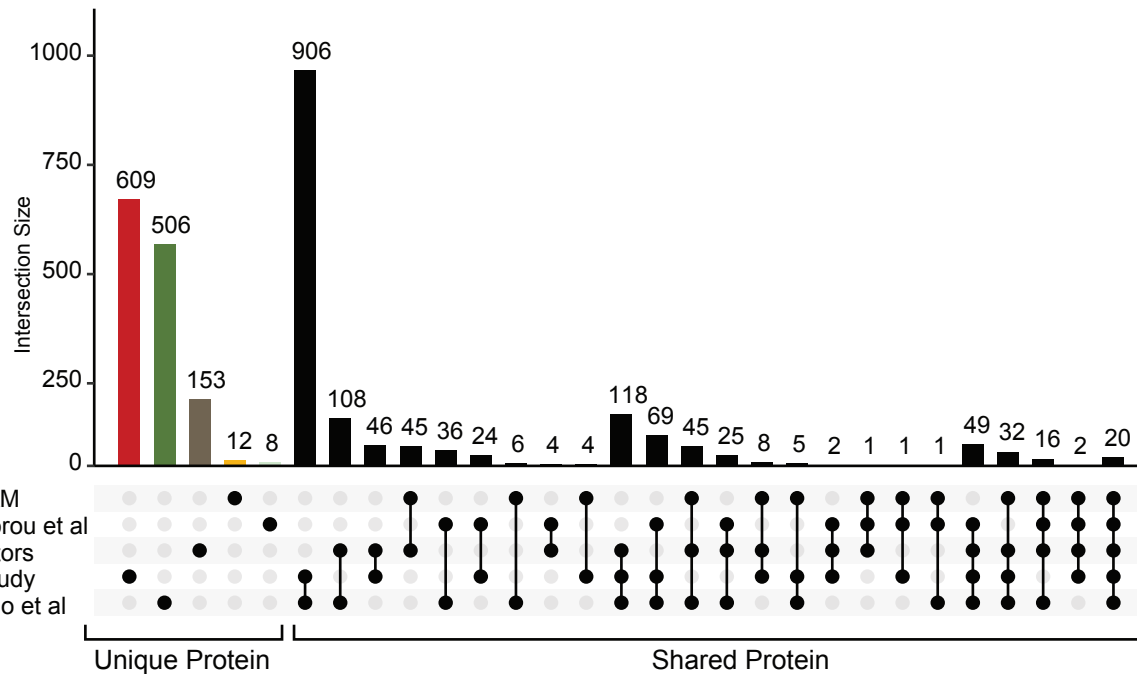

Supplement: supp [file elife-73524-supp-v1.zip › elife_poa_e73524_Figure_1_figure_supplement_1.pdf]
