# Supplementary material for: Distinct and diverse chromatin proteomes of ageing mouse organs reveal protein signatures that correlate with physiological functions
Source: eLife journal article supplement (doi:10.7554/elife.73524), 2022-03-08
Supplement: supp [file elife-73524-supp-v1.zip › elife_poa_e73524_Supplementary_file_1.xlsx]

## Sheet: mESC
Accession	peptide count	Unique ptides	Confidence score	Description	NAME	QEHF3_02604_GO_TL_1	QEHF3_02605_GO_TL_2	QEHF3_02606_GO_TL_3	QEHF3_02607_GO_TL_4	QEHF3_02599_GO_chr_1	QEHF3_02600_GO_chr_2	QEHF3_02601_GO_chr_3	QEHF3_02602_GO_chr_4
P17742	14	14	1009.4	Peptidyl-prolyl cis-trans isomerase A OS=Mus musculus GN=Ppia PE=1 SV=2	Ppia	6.39502e+08	5.97107e+08	4.92121e+08	7.1258e+08	4.86348e+07	4.86348e+07	4.36359e+07	5.40224e+07
P60710	20	19	1152.39	Actin, cytoplasmic 1 OS=Mus musculus GN=Actb PE=1 SV=1	Actb	4.74189e+08	4.47525e+08	4.86919e+08	5.35881e+08	4.55554e+08	4.55554e+08	4.22384e+08	5.07844e+08
P22752	3	3	292.86	Histone H2A ty 1 OS=Mus musculus GN=Hist1h2ab =1 SV=3	Hist1h2ab	3.80858e+08	3.4937e+08	4.05328e+08	3.61701e+08	3.00668e+09	3.00668e+09	2.97737e+09	3.17817e+09
P63017	25	25	1567.84	Heat shock cognate 71 kDa protein OS=Mus musculus GN=Hspa8 PE=1 SV=1	Hspa8	3.30731e+08	3.36993e+08	2.99654e+08	3.94017e+08	2.18865e+08	2.18865e+08	2.0268e+08	1.63905e+08
P14602	5	5	296.49	Heat shock protein beta-1 OS=Mus musculus GN=Hspb1 PE=1 SV=3	Hspb1	3.09506e+08	3.11565e+08	3.02236e+08	3.22238e+08	3.40556e+06	3.40556e+06	3.68152e+06	3.97249e+06
P62806	13	12	1127.83	Histone H4 OS=Mus musculus GN=Hist1h4a =1 SV=2	Hist1h4a	2.00284e+08	2.19287e+08	1.99267e+08	2.3904e+08	1.18376e+09	1.18376e+09	1.10269e+09	1.09037e+09
P99027	3	3	169.78	60S acidic ribosomal protein P2 OS=Mus musculus GN=Rplp2 PE=1 SV=3	Rplp2	1.94534e+08	1.6545e+08	1.74162e+08	2.1261e+08	3.54605e+07	3.54605e+07	3.29545e+07	4.32286e+07
P56480	10	10	650.12	ATP synthase subunit beta, mitochondrial OS=Mus musculus GN=Atp5b PE=1 SV=2	Atp5b	1.91233e+08	1.76105e+08	1.88493e+08	1.90835e+08	5.05364e+07	5.05364e+07	4.57895e+07	5.02377e+07
Q9DBJ1	5	5	301.91	Phosphoglycerate mutase 1 OS=Mus musculus GN=Pgam1 PE=1 SV=3	Pgam1	1.88502e+08	1.91364e+08	1.70155e+08	1.93346e+08	1.02756e+06	1.02756e+06	1.00639e+06	266928
P10853	1	1	54.24	Histone H2B type 1-F/J/L OS=Mus musculus GN=Hist1h2bf PE=1 SV=2	Hist1h2bf	1.65719e+08	1.43293e+08	1.26329e+08	1.52109e+08	6.58395e+07	6.58395e+07	5.66693e+07	5.67363e+07
P16858	5	5	315.77	Glyceraldehyde-3-phosphate dehydrogenase OS=Mus musculus GN=Gapdh PE=1 SV=2	Gapdh	1.64887e+08	1.63662e+08	1.57109e+08	1.75462e+08	1.68606e+07	1.68606e+07	2.01233e+07	2.63107e+07
P62962	8	8	614.31	Profilin-1 OS=Mus musculus GN=Pfn1 PE=1 SV=2	Pfn1	1.61515e+08	1.52995e+08	1.67795e+08	1.89278e+08	850276	850276	972342	1.33408e+06
P40142	13	13	816.68	Transketolase OS=Mus musculus GN=Tkt PE=1 SV=1	Tkt	1.40551e+08	1.53468e+08	1.28188e+08	1.49224e+08	496633	496633	464325	171614
Q04447	9	9	502.42	Creatine kinase B-type OS=Mus musculus GN=Ckb PE=1 SV=1	Ckb	1.37396e+08	1.25172e+08	1.36487e+08	1.4332e+08	1.11464e+06	1.11464e+06	1.00849e+06	701560
P63038	22	22	1669.28	60 kDa heat shock protein, mitochondrial OS=Mus musculus GN=Hspd1 PE=1 SV=1	Hspd1	1.24444e+08	1.40781e+08	1.18667e+08	1.48494e+08	6.14828e+07	6.14828e+07	6.51577e+07	7.23798e+07
Q61937	14	14	1150.45	Nucleophosmin OS=Mus musculus GN=Npm1 =1 SV=1	Npm1	1.15613e+08	1.13297e+08	1.08253e+08	1.04678e+08	4.52407e+08	4.52407e+08	4.60722e+08	5.34402e+08
P07901	25	21	1934.01	Heat shock protein HSP 90-alpha OS=Mus musculus GN=Hsp90aa1 PE=1 SV=4	Hsp90aa1	1.13425e+08	1.16571e+08	1.00434e+08	1.27168e+08	7.36456e+06	7.36456e+06	8.46666e+06	8.00468e+06
Q9EQU5	6	6	399.73	Protein SET OS=Mus musculus GN=Set PE=1 SV=1	Set	1.12587e+08	1.0527e+08	1.106e+08	1.17473e+08	3.76803e+06	3.76803e+06	3.5018e+06	4.24561e+06
P17182	18	18	1347.15	Alpha-enolase OS=Mus musculus GN=Eno1 PE=1 SV=3	Eno1	1.11922e+08	1.08492e+08	1.14662e+08	1.11811e+08	1.67053e+06	1.67053e+06	2.50103e+06	3.48393e+06
P08228	4	4	337.45	Superoxide dismutase [Cu-Zn] OS=Mus musculus GN=Sod1 PE=1 SV=2	Sod1	1.08596e+08	1.28397e+08	1.26167e+08	1.44041e+08	290902	290902	317087	302998
P52480	13	13	880.58	Pyruvate kinase PKM OS=Mus musculus GN=Pkm PE=1 SV=4	Pkm	1.05683e+08	9.58584e+07	1.06588e+08	1.13794e+08	709556	709556	854363	804153
Q64433	5	5	448.74	10 kDa heat shock protein, mitochondrial OS=Mus musculus GN=Hspe1 PE=1 SV=2	Hspe1	9.77638e+07	1.16893e+08	1.24119e+08	1.31923e+08	4.74374e+07	4.74374e+07	4.06442e+07	4.21545e+07
P14206	6	6	470.93	40S ribosomal protein SA OS=Mus musculus GN=Rpsa PE=1 SV=4	Rpsa	8.91003e+07	9.09838e+07	8.61739e+07	9.80405e+07	5.85265e+07	5.85265e+07	6.19727e+07	6.6133e+07
Q01768	8	8	695.49	Nucleoside diphosphate kinase B OS=Mus musculus GN=Nme2 =1 SV=1	Nme2	8.75708e+07	7.36589e+07	7.77697e+07	8.62592e+07	0	0	0	0
P57776	7	7	488.09	Elongation factor 1-delta OS=Mus musculus GN=Eef1d PE=1 SV=3	Eef1d	7.93195e+07	8.42484e+07	8.62864e+07	9.61674e+07	1.53215e+07	1.53215e+07	1.33041e+07	1.34719e+07
P02301	1	1	47.5	Histone H3.3C OS=Mus musculus GN=H3f3c PE=3 SV=3	H3f3c	7.53863e+07	6.85246e+07	6.36122e+07	7.38886e+07	0	0	0	0
P14211	4	4	230.09	Calreticulin OS=Mus musculus GN=Calr PE=1 SV=1	Calr	7.36978e+07	6.53264e+07	6.21211e+07	7.5011e+07	1.09534e+07	1.09534e+07	9.24761e+06	9.73666e+06
P68369	3	3	258.7	Tubulin alpha-1A chain OS=Mus musculus GN=Tuba1a =1 SV=1	Tuba1a	7.24817e+07	5.55016e+07	6.47773e+07	6.8916e+07	5.6756e+06	5.6756e+06	6.77601e+06	8.01374e+06
P28656	3	3	142.95	Nucleosome assembly protein 1-like 1 OS=Mus musculus GN=Nap1l1 PE=1 SV=2	Nap1l1	6.89338e+07	6.39019e+07	6.72793e+07	7.43137e+07	86991.7	86991.7	243688	329741
Q64522	2	2	129.54	Histone H2A ty 2-B OS=Mus musculus GN=Hist2h2ab =1 SV=3	Hist2h2ab	6.76282e+07	6.68693e+07	7.86548e+07	1.00776e+08	6.01191e+08	6.01191e+08	4.40879e+08	4.94181e+08
P20029	11	11	745.65	78 kDa glucose-regulated protein OS=Mus musculus GN=Hspa5 PE=1 SV=3	Hspa5	6.53765e+07	6.38421e+07	6.77573e+07	6.5792e+07	3.36563e+07	3.36563e+07	2.79735e+07	2.95897e+07
P34884	5	5	292.82	Macrophage migration inhibitory factor OS=Mus musculus GN=Mif PE=1 SV=2	Mif	6.12236e+07	6.94134e+07	5.81609e+07	6.74304e+07	4.11316e+06	4.11316e+06	3.83055e+06	4.84505e+06
P08249	10	10	712	Malate dehydrogenase, mitochondrial OS=Mus musculus GN=Mdh2 PE=1 SV=3	Mdh2	6.03937e+07	5.50906e+07	5.68483e+07	6.82696e+07	2.76942e+07	2.76942e+07	3.59876e+07	4.01192e+07
Q9CZX8	3	3	230.28	40S ribosomal protein S19 OS=Mus musculus GN=Rps19 PE=1 SV=3	Rps19	5.88595e+07	5.07639e+07	5.71597e+07	5.92389e+07	4.76464e+06	4.76464e+06	5.1633e+06	5.55322e+06
Q99PT1	5	5	266.51	Rho GDP-dissociation inhibitor 1 OS=Mus musculus GN=Arhgdia PE=1 SV=3	Arhgdia	5.8756e+07	5.99425e+07	5.42097e+07	6.44581e+07	400410	400410	359771	35799.4
P05214	13	13	1016.42	Tubulin alpha-3 chain OS=Mus musculus GN=Tuba3a =1 SV=1	Tuba3a	5.78584e+07	5.8865e+07	6.0055e+07	6.95695e+07	0	0	0	0
P18760	2	2	134.76	Cofilin-1 OS=Mus musculus GN=Cfl1 PE=1 SV=3	Cfl1	5.67241e+07	7.79993e+07	4.64458e+07	3.51422e+07	1.06448e+07	1.06448e+07	1.18557e+07	1.06869e+07
P62983	5	5	329.9	Ubiquitin-40S ribosomal protein S27a OS=Mus musculus GN=Rps27a PE=1 SV=2	Rps27a	5.66945e+07	6.13597e+07	6.33641e+07	6.42819e+07	6.42084e+07	6.42084e+07	4.91305e+07	5.59215e+07
Q9CPY7	12	12	755.04	Cytosol aminopeptidase OS=Mus musculus GN=Lap3 PE=1 SV=3	Lap3	5.62286e+07	5.48748e+07	5.28927e+07	4.40906e+07	5.46268e+06	5.46268e+06	4.73842e+06	4.32247e+06
P10126	10	10	802.9	Elongation factor 1-alpha 1 OS=Mus musculus GN=Eef1a1 =1 SV=3	Eef1a1	5.59967e+07	6.11803e+07	6.30303e+07	7.31466e+07	2.23091e+08	2.23091e+08	2.32334e+08	1.40263e+08
Q9ERD7	1	1	44.51	Tubulin beta-3 chain OS=Mus musculus GN=Tubb3 PE=1 SV=1	Tubb3	5.58123e+07	6.6497e+07	6.00673e+07	6.76038e+07	0	0	0	0
P99024	12	11	727.64	Tubulin beta-5 chain OS=Mus musculus GN=Tubb5 PE=1 SV=1	Tubb5	5.3113e+07	4.96115e+07	4.73629e+07	4.44886e+07	8.57186e+06	8.57186e+06	9.01955e+06	9.04291e+06
P0C0S6	1	1	45.78	Histone H2A.Z OS=Mus musculus GN=H2afz =1 SV=2	H2afz	5.20055e+07	6.21323e+07	6.00706e+07	5.0397e+07	1.08275e+08	1.08275e+08	9.69671e+07	9.65569e+07
P63158	6	6	437.09	High mobility group protein B1 OS=Mus musculus GN=Hmgb1 =1 SV=2	Hmgb1	4.95882e+07	4.51916e+07	4.54898e+07	4.61044e+07	6.80875e+07	6.80875e+07	5.22964e+07	5.02575e+07
Q62318	20	20	1327.08	Transcription intermediary factor 1-beta OS=Mus musculus GN=Trim28 =1 SV=3	Trim28	4.92311e+07	4.84382e+07	5.18431e+07	4.97e+07	9.08653e+07	9.08653e+07	9.3983e+07	9.48849e+07
P05064	12	12	946.19	Fructose-bisphosphate aldolase A OS=Mus musculus GN=Aldoa PE=1 SV=2	Aldoa	4.87381e+07	4.71627e+07	4.77976e+07	5.71208e+07	3.33896e+06	3.33896e+06	3.23929e+06	2.79964e+06
Q60932	12	11	855.75	Voltage-dendent anion-selective channel protein 1 OS=Mus musculus GN=Vdac1 =1 SV=3	Vdac1	4.78618e+07	5.57127e+07	5.45728e+07	6.1685e+07	0	0	0	0
O70251	2	2	110.69	Elongation factor 1-beta OS=Mus musculus GN=Eef1b PE=1 SV=5	Eef1b	4.78163e+07	4.47286e+07	4.27367e+07	4.46594e+07	1.71302e+07	1.71302e+07	1.3652e+07	1.72458e+07
Q02053	9	9	732.01	Ubiquitin-like modifier-activating enzyme 1 OS=Mus musculus GN=Uba1 PE=1 SV=1	Uba1	4.76356e+07	4.68402e+07	5.35346e+07	4.97357e+07	0	0	0	0
P24472	4	4	330.66	Glutathione S-transferase A4 OS=Mus musculus GN=Gsta4 PE=1 SV=3	Gsta4	4.75138e+07	4.96034e+07	4.79163e+07	5.77241e+07	62506.5	62506.5	186559	210873
P61957	1	1	47.67	Small ubiquitin-related modifier 2 OS=Mus musculus GN=Sumo2 PE=1 SV=1	Sumo2	4.67895e+07	4.22467e+07	3.87811e+07	4.85271e+07	0	0	0	0
P06745	2	2	121.82	Glucose-6-phosphate isomerase OS=Mus musculus GN=Gpi PE=1 SV=4	Gpi	4.66934e+07	4.51453e+07	5.46381e+07	5.22895e+07	0	0	0	0
P38647	17	17	1108.18	Stress-70 protein, mitochondrial OS=Mus musculus GN=Hspa9 PE=1 SV=3	Hspa9	4.57199e+07	4.20409e+07	4.60167e+07	4.3315e+07	2.25306e+07	2.25306e+07	2.68348e+07	2.58646e+07
O88569	11	10	659.66	Heterogeneous nuclear ribonucleoproteins A2/B1 OS=Mus musculus GN=Hnrnpa2b1 =1 SV=2	Hnrnpa2b1	4.26804e+07	3.65726e+07	3.24235e+07	2.69582e+07	1.03484e+09	1.03484e+09	1.03438e+09	9.06895e+08
P17751	9	9	731.71	Triosephosphate isomerase OS=Mus musculus GN=Tpi1 PE=1 SV=4	Tpi1	4.16377e+07	4.994e+07	4.62231e+07	4.50533e+07	0	0	0	0
P35700	3	2	196.7	Peroxiredoxin-1 OS=Mus musculus GN=Prdx1 PE=1 SV=1	Prdx1	4.1564e+07	4.2089e+07	4.71462e+07	4.72249e+07	4.33605e+06	4.33605e+06	5.49215e+06	5.42292e+06
P17918	5	5	305.5	Proliferating cell nuclear antigen OS=Mus musculus GN=Pcna PE=1 SV=2	Pcna	4.13324e+07	4.17591e+07	4.69142e+07	4.30317e+07	1.52004e+07	1.52004e+07	1.4362e+07	1.27189e+07
P09411	9	9	497.59	Phosphoglycerate kinase 1 OS=Mus musculus GN=Pgk1 PE=1 SV=4	Pgk1	4.06369e+07	3.5998e+07	3.25858e+07	3.96309e+07	787417	787417	1.09853e+06	881471
P58252	19	19	1122.76	Elongation factor 2 OS=Mus musculus GN=Eef2 PE=1 SV=2	Eef2	4.04969e+07	4.08883e+07	3.56933e+07	4.32266e+07	3.37245e+06	3.37245e+06	4.17099e+06	5.6914e+06
P70296	3	3	219.98	Phosphatidylethanolamine-binding protein 1 OS=Mus musculus GN=Pebp1 PE=1 SV=3	Pebp1	3.91016e+07	4.40728e+07	3.47471e+07	4.07256e+07	0	0	0	0
P80314	8	8	472.26	T-complex protein 1 subunit beta OS=Mus musculus GN=Cct2 PE=1 SV=4	Cct2	3.9084e+07	3.89697e+07	2.11348e+07	4.19245e+07	3.9569e+06	3.9569e+06	3.74902e+06	3.89034e+06
P97825	1	1	55.81	Hematological and neurological expressed 1 protein OS=Mus musculus GN=Hn1 PE=1 SV=3	Hn1	3.88752e+07	3.89366e+07	4.1145e+07	4.32672e+07	0	0	0	0
P30681	4	4	440.41	High mobility group protein B2 OS=Mus musculus GN=Hmgb2 =1 SV=3	Hmgb2	3.78059e+07	3.42366e+07	3.77781e+07	3.26916e+07	1.73165e+08	1.73165e+08	1.30511e+08	1.35165e+08
P70670	2	2	160.6	Nascent polypeptide-associated complex subunit alpha, muscle-specific form OS=Mus musculus GN=Naca PE=1 SV=2	Naca	3.70562e+07	3.92792e+07	3.9522e+07	4.64866e+07	5.77218e+06	5.77218e+06	8.10774e+06	1.11366e+07
Q99LX0	3	3	180.23	Protein deglycase DJ-1 OS=Mus musculus GN=Park7 PE=1 SV=1	Park7	3.68499e+07	3.32742e+07	2.81415e+07	3.71734e+07	601697	601697	265348	703459
P62270	3	3	148.04	40S ribosomal protein S18 OS=Mus musculus GN=Rps18 PE=1 SV=3	Rps18	3.67724e+07	3.59313e+07	3.6889e+07	3.99153e+07	2.53054e+06	2.53054e+06	1.8214e+06	2.79046e+06
P60843	6	6	413.99	Eukaryotic initiation factor 4A-I OS=Mus musculus GN=Eif4a1 PE=1 SV=1	Eif4a1	3.64135e+07	3.69282e+07	4.10874e+07	4.16828e+07	1.08751e+07	1.08751e+07	1.16354e+07	1.12974e+07
P11499	18	15	1233.33	Heat shock protein HSP 90-beta OS=Mus musculus GN=Hsp90ab1 PE=1 SV=3	Hsp90ab1	3.55845e+07	3.45334e+07	4.07252e+07	4.81384e+07	9.398e+06	9.398e+06	8.66947e+06	7.7782e+06
P05201	2	2	97.22	Aspartate aminotransferase, cytoplasmic OS=Mus musculus GN=Got1 PE=1 SV=3	Got1	3.52846e+07	3.42187e+07	3.68367e+07	3.30952e+07	0	0	0	0
P54227	2	2	164.07	Stathmin OS=Mus musculus GN=Stmn1 PE=1 SV=2	Stmn1	3.45958e+07	4.24601e+07	3.70859e+07	4.18942e+07	0	0	0	0
P61979	17	17	1285.37	Heterogeneous nuclear ribonucleoprotein K OS=Mus musculus GN=Hnrnpk =1 SV=1	Hnrnpk	3.35668e+07	3.8544e+07	3.55097e+07	4.08246e+07	2.10127e+08	2.10127e+08	1.70057e+08	1.81911e+08
P63028	1	1	95.26	Translationally-controlled tumor protein OS=Mus musculus GN=Tpt1 PE=1 SV=1	Tpt1	3.28021e+07	3.22751e+07	3.37418e+07	3.72592e+07	7.90352e+06	7.90352e+06	8.29647e+06	8.99461e+06
Q91WK5	1	1	32.91	Glycine cleavage system H protein, mitochondrial OS=Mus musculus GN=Gcsh =1 SV=2	Gcsh	3.23255e+07	3.27215e+07	3.40853e+07	3.02645e+07	9.84908e+06	9.84908e+06	8.86926e+06	8.40241e+06
Q4VAA2	1	1	44.97	Protein CDV3 OS=Mus musculus GN=Cdv3 PE=1 SV=2	Cdv3	3.23061e+07	3.49787e+07	2.91345e+07	3.28792e+07	269.264	269.264	11872.1	3.63932e+06
P45591	3	3	203.08	Cofilin-2 OS=Mus musculus GN=Cfl2 PE=1 SV=1	Cfl2	3.05317e+07	3.90535e+07	3.32857e+07	4.17025e+07	0	0	0	0
P27773	11	11	631.91	Protein disulfide-isomerase A3 OS=Mus musculus GN=Pdia3 PE=1 SV=2	Pdia3	2.98181e+07	2.95159e+07	2.9433e+07	3.07519e+07	2.40345e+07	2.40345e+07	2.25313e+07	2.47618e+07
P49722	3	3	164.25	Proteasome subunit alpha type-2 OS=Mus musculus GN=Psma2 PE=1 SV=3	Psma2	2.95622e+07	2.81573e+07	3.19312e+07	3.07036e+07	601597	601597	530363	470953
O08709	7	7	379.36	Peroxiredoxin-6 OS=Mus musculus GN=Prdx6 PE=1 SV=3	Prdx6	2.95535e+07	3.06507e+07	3.50282e+07	3.10859e+07	0	0	0	0
P12787	1	1	54.55	Cytochrome c oxidase subunit 5A, mitochondrial OS=Mus musculus GN=Cox5a PE=1 SV=2	Cox5a	2.92907e+07	3.41824e+07	2.78972e+07	3.25446e+07	1.6051e+06	1.6051e+06	1.39117e+06	1.86381e+06
Q64152	2	2	88.84	Transcription factor BTF3 OS=Mus musculus GN=Btf3 PE=1 SV=3	Btf3	2.92789e+07	3.38078e+07	3.15104e+07	4.28697e+07	1.48055e+07	1.48055e+07	1.3934e+07	1.61906e+07
Q03265	5	5	306.1	ATP synthase subunit alpha, mitochondrial OS=Mus musculus GN=Atp5a1 PE=1 SV=1	Atp5a1	2.90815e+07	2.8593e+07	3.23478e+07	3.40253e+07	1.35941e+07	1.35941e+07	1.35868e+07	1.23865e+07
P63276	1	1	39.52	40S ribosomal protein S17 OS=Mus musculus GN=Rps17 PE=1 SV=2	Rps17	2.89373e+07	2.7863e+07	9.9858e+06	2.49388e+07	1.28107e+07	1.28107e+07	1.35389e+07	1.11948e+07
P63325	2	2	87.67	40S ribosomal protein S10 OS=Mus musculus GN=Rps10 PE=1 SV=1	Rps10	2.87206e+07	2.76925e+07	3.11553e+07	3.00173e+07	5.88137e+06	5.88137e+06	7.26932e+06	8.04093e+06
Q61171	4	4	293.49	Peroxiredoxin-2 OS=Mus musculus GN=Prdx2 PE=1 SV=3	Prdx2	2.83598e+07	2.95284e+07	2.87394e+07	3.24382e+07	0	0	0	0
Q9D8N0	5	5	294.51	Elongation factor 1-gamma OS=Mus musculus GN=Eef1g PE=1 SV=3	Eef1g	2.79027e+07	2.81901e+07	2.26112e+07	2.65383e+07	1.61209e+07	1.61209e+07	1.72738e+07	1.69398e+07
Q8K3F7	10	10	678.26	L-threonine 3-dehydrogenase, mitochondrial OS=Mus musculus GN=Tdh =1 SV=1	Tdh	2.71825e+07	2.57398e+07	2.69631e+07	2.58014e+07	2.79078e+07	2.79078e+07	2.56559e+07	2.80107e+07
P83917	3	3	198.46	Chromobox protein homolog 1 OS=Mus musculus GN=Cbx1 =1 SV=1	Cbx1	2.69803e+07	2.83031e+07	3.22445e+07	2.81745e+07	7.54501e+07	7.54501e+07	8.51478e+07	7.65553e+07
Q9CQX2	3	3	255.59	Cytochrome b5 ty B OS=Mus musculus GN=Cyb5b =1 SV=1	Cyb5b	2.67633e+07	2.4745e+07	2.30726e+07	1.97937e+07	0	0	0	0
P29391	3	3	258.8	Ferritin light chain 1 OS=Mus musculus GN=Ftl1 PE=1 SV=2	Ftl1	2.66697e+07	2.10184e+07	2.23203e+07	2.89326e+07	4.32686e+06	4.32686e+06	3.73491e+06	4.19489e+06
Q00PI9	23	23	1725.46	Heterogeneous nuclear ribonucleoprotein U-like protein 2 OS=Mus musculus GN=Hnrnpul2 PE=1 SV=2	Hnrnpul2	2.62125e+07	2.62125e+07	2.49411e+07	2.58155e+07	0	0	0	0
Q9Z2U1	3	3	184.86	Proteasome subunit alpha type-5 OS=Mus musculus GN=Psma5 PE=1 SV=1	Psma5	2.57729e+07	2.68972e+07	2.40906e+07	2.83136e+07	768814	768814	708965	555158
Q9CQR2	6	6	535.33	40S ribosomal protein S21 OS=Mus musculus GN=Rps21 =1 SV=1	Rps21	2.48142e+07	2.3588e+07	2.37798e+07	2.48133e+07	3.84926e+07	3.84926e+07	2.62689e+07	2.44464e+07
Q6ZWY8	1	1	61.91	Thymosin beta-10 OS=Mus musculus GN=Tmsb10 PE=1 SV=3	Tmsb10	2.45775e+07	1.97754e+07	1.73962e+07	2.53047e+07	0	0	0	0
P09103	4	4	286.7	Protein disulfide-isomerase OS=Mus musculus GN=P4hb PE=1 SV=2	P4hb	2.45335e+07	2.38526e+07	2.41254e+07	2.84731e+07	4.24873e+06	4.24873e+06	6.60971e+06	7.03703e+06
Q60864	5	5	265.02	Stress-induced-phosphoprotein 1 OS=Mus musculus GN=Stip1 PE=1 SV=1	Stip1	2.41207e+07	2.30873e+07	2.05041e+07	2.23275e+07	3.34662e+06	3.34662e+06	3.82421e+06	2.55773e+06
P49312	7	6	489.96	Heterogeneous nuclear ribonucleoprotein A1 OS=Mus musculus GN=Hnrnpa1 =1 SV=2	Hnrnpa1	2.39733e+07	2.11874e+07	2.05552e+07	1.96559e+07	6.35303e+08	6.35303e+08	9.57092e+08	1.31673e+09
Q9Z2U0	3	3	171.44	Proteasome subunit alpha type-7 OS=Mus musculus GN=Psma7 PE=1 SV=1	Psma7	2.37086e+07	2.24708e+07	2.34104e+07	2.6074e+07	857255	857255	1.00151e+06	1.10523e+06
P62858	2	2	117.02	40S ribosomal protein S28 OS=Mus musculus GN=Rps28 PE=1 SV=1	Rps28	2.32897e+07	2.20001e+07	2.16898e+07	2.54623e+07	7.78045e+06	7.78045e+06	7.89552e+06	1.09466e+07
Q61316	14	14	888.89	Heat shock 70 kDa protein 4 OS=Mus musculus GN=Hspa4 PE=1 SV=1	Hspa4	2.30644e+07	2.71837e+07	2.12802e+07	2.50008e+07	6.21286e+06	6.21286e+06	5.80436e+06	7.21477e+06
P09405	16	16	893.17	Nucleolin OS=Mus musculus GN=Ncl =1 SV=2	Ncl	2.30486e+07	2.26309e+07	2.55943e+07	2.64656e+07	1.90331e+08	1.90331e+08	2.41493e+08	3.0977e+08
P29758	11	11	640.02	Ornithine aminotransferase, mitochondrial OS=Mus musculus GN=Oat PE=1 SV=1	Oat	2.27077e+07	2.04745e+07	2.13976e+07	2.17416e+07	8.25215e+06	8.25215e+06	7.4407e+06	8.6046e+06
Q9EST5	3	3	175.57	Acidic leucine-rich nuclear phosphoprotein 32 family member B OS=Mus musculus GN=Anp32b PE=1 SV=1	Anp32b	2.24395e+07	2.63111e+07	2.61522e+07	2.61338e+07	0	0	0	0
P31786	1	1	48.37	Acyl-CoA-binding protein OS=Mus musculus GN=Dbi PE=1 SV=2	Dbi	2.23989e+07	1.97746e+07	2.17778e+07	2.22916e+07	0	0	0	0
P63101	5	5	305.6	14-3-3 protein zeta/delta OS=Mus musculus GN=Ywhaz PE=1 SV=1	Ywhaz	2.23195e+07	1.95702e+07	1.66074e+07	2.02142e+07	3.37662e+06	3.37662e+06	2.55984e+06	2.55328e+06
Q9WTQ5	7	7	377.95	A-kinase anchor protein 12 OS=Mus musculus GN=Akap12 PE=1 SV=1	Akap12	2.1545e+07	1.93791e+07	2.23143e+07	2.04909e+07	2.97696e+06	2.97696e+06	3.18355e+06	3.70759e+06
O35737	2	2	117.41	Heterogeneous nuclear ribonucleoprotein H OS=Mus musculus GN=Hnrnph1 =1 SV=3	Hnrnph1	2.13154e+07	2.14884e+07	2.44649e+07	2.12481e+07	1.62424e+08	1.62424e+08	1.79309e+08	2.29702e+08
O35215	4	4	255.47	D-dopachrome decarboxylase OS=Mus musculus GN=Ddt PE=1 SV=3	Ddt	2.1064e+07	1.92571e+07	1.96661e+07	1.93597e+07	0	0	0	0
P62259	5	5	427.06	14-3-3 protein epsilon OS=Mus musculus GN=Ywhae PE=1 SV=1	Ywhae	2.1057e+07	2.28001e+07	1.9416e+07	2.51388e+07	3.67764e+06	3.67764e+06	3.04516e+06	3.02013e+06
Q61029	8	8	475.05	Lamina-associated polyptide 2, isoforms beta/delta/epsilon/gamma OS=Mus musculus GN=Tmpo =1 SV=4	Tmpo	2.09896e+07	1.98691e+07	1.92413e+07	2.03123e+07	2.58005e+07	2.58005e+07	2.17989e+07	3.27078e+07
Q60876	1	1	41.91	Eukaryotic translation initiation factor 4E-binding protein 1 OS=Mus musculus GN=Eif4ebp1 PE=1 SV=3	Eif4ebp1	2.09267e+07	2.00599e+07	2.07412e+07	1.93277e+07	0	0	0	0
P14869	1	1	62.1	60S acidic ribosomal protein P0 OS=Mus musculus GN=Rplp0 PE=1 SV=3	Rplp0	2.08751e+07	1.97025e+07	2.01479e+07	2.06483e+07	6.51288e+06	6.51288e+06	9.98729e+06	7.18347e+06
P70697	4	4	175.92	Uroporphyrinogen decarboxylase OS=Mus musculus GN=Urod =1 SV=2	Urod	2.08035e+07	2.00201e+07	2.30897e+07	2.34326e+07	0	0	0	0
Q9CPQ8	4	4	286.52	ATP synthase subunit g, mitochondrial OS=Mus musculus GN=Atp5l =1 SV=1	Atp5l	2.07873e+07	2.17714e+07	2.24244e+07	2.27118e+07	0	0	0	0
P14148	2	2	102.51	60S ribosomal protein L7 OS=Mus musculus GN=Rpl7 PE=1 SV=2	Rpl7	2.06623e+07	1.98699e+07	2.04687e+07	2.12597e+07	0	0	0	0
P43277	1	1	106.51	Histone H1.3 OS=Mus musculus GN=Hist1h1d PE=1 SV=2	Hist1h1d	2.04741e+07	2.21806e+07	1.9707e+07	2.78377e+07	0	0	0	0
Q99MD9	4	4	268.62	Nuclear autoantigenic sperm protein OS=Mus musculus GN=Nasp PE=1 SV=2	Nasp	2.03659e+07	1.92769e+07	1.80878e+07	1.93264e+07	0	0	0	0
P34022	5	5	375.2	Ran-specific GTPase-activating protein OS=Mus musculus GN=Ranbp1 PE=1 SV=2	Ranbp1	2.02198e+07	2.09542e+07	1.99808e+07	2.32401e+07	15594.5	15594.5	852374	1.66555e+06
O35381	1	1	58.19	Acidic leucine-rich nuclear phosphoprotein 32 family member A OS=Mus musculus GN=Anp32a PE=1 SV=1	Anp32a	1.93973e+07	2.01441e+07	1.76605e+07	2.04169e+07	0	0	0	0
Q8BVI4	4	4	171.78	Dihydropteridine reductase OS=Mus musculus GN=Qdpr PE=1 SV=2	Qdpr	1.92479e+07	2.03874e+07	1.86818e+07	2.00146e+07	0	0	0	0
P70349	3	3	154.98	Histidine triad nucleotide-binding protein 1 OS=Mus musculus GN=Hint1 PE=1 SV=3	Hint1	1.92391e+07	2.09635e+07	1.91275e+07	2.42248e+07	0	0	0	0
P30416	10	10	510.09	Peptidyl-prolyl cis-trans isomerase FKBP4 OS=Mus musculus GN=Fkbp4 PE=1 SV=5	Fkbp4	1.9106e+07	2.12103e+07	1.86016e+07	2.23334e+07	72078.2	72078.2	79420.1	61643.2
Q9CQ71	2	2	103.73	Replication protein A 14 kDa subunit OS=Mus musculus GN=Rpa3 =1 SV=1	Rpa3	1.89371e+07	1.77346e+07	2.1405e+07	1.63794e+07	8.88718e+06	8.88718e+06	9.43954e+06	1.17318e+07
Q99K85	5	5	320.75	Phosphoserine aminotransferase OS=Mus musculus GN=Psat1 PE=1 SV=1	Psat1	1.87925e+07	2.14784e+07	1.96794e+07	2.1655e+07	652339	652339	781493	601554
P35564	1	1	57.88	Calnexin OS=Mus musculus GN=Canx PE=1 SV=1	Canx	1.85535e+07	1.5492e+07	1.538e+07	1.73063e+07	6.16576e+06	6.16576e+06	5.84712e+06	7.61751e+06
Q8R081	6	6	362.06	Heterogeneous nuclear ribonucleoprotein L OS=Mus musculus GN=Hnrnpl =1 SV=2	Hnrnpl	1.84982e+07	1.91871e+07	1.87508e+07	2.18719e+07	3.00856e+08	3.00856e+08	3.39675e+08	3.86956e+08
P51859	5	5	241.07	Hepatoma-derived growth factor OS=Mus musculus GN=Hdgf =1 SV=2	Hdgf	1.84593e+07	2.00145e+07	1.682e+07	1.87034e+07	1.67249e+07	1.67249e+07	1.85877e+07	2.27672e+07
P62305	1	1	38.73	Small nuclear ribonucleoprotein E OS=Mus musculus GN=Snr =1 SV=1	Snr	1.83384e+07	1.80188e+07	2.09449e+07	1.71985e+07	2.98654e+07	2.98654e+07	2.84873e+07	2.70988e+06
P26443	16	16	1088.58	Glutamate dehydrogenase 1, mitochondrial OS=Mus musculus GN=Glud1 =1 SV=1	Glud1	1.82693e+07	1.75588e+07	1.50865e+07	1.97453e+07	2.57722e+07	2.57722e+07	2.89176e+07	2.3303e+07
Q9CZ44	3	3	176.36	NSFL1 cofactor p47 OS=Mus musculus GN=Nsfl1c PE=1 SV=1	Nsfl1c	1.82305e+07	1.92718e+07	1.49983e+07	1.96237e+07	0	0	0	0
P45376	4	4	200.98	Aldose reductase OS=Mus musculus GN=Akr1b1 PE=1 SV=3	Akr1b1	1.81869e+07	2.20237e+07	1.7811e+07	2.18681e+07	2510.11	2510.11	5289.15	1750.57
Q922R8	2	2	146.61	Protein disulfide-isomerase A6 OS=Mus musculus GN=Pdia6 PE=1 SV=3	Pdia6	1.81412e+07	1.68305e+07	1.76542e+07	1.79661e+07	1.15768e+07	1.15768e+07	1.3104e+07	1.44633e+07
P26040	1	1	66.14	Ezrin OS=Mus musculus GN=Ezr PE=1 SV=3	Ezr	1.80256e+07	1.9732e+07	1.76189e+07	1.79141e+07	1.07825e+06	1.07825e+06	754213	231706
P68372	4	3	295.62	Tubulin beta-4B chain OS=Mus musculus GN=Tubb4b PE=1 SV=1	Tubb4b	1.79149e+07	1.64631e+07	1.55696e+07	1.95882e+07	0	0	0	0
Q9WVA4	2	2	130.48	Transgelin-2 OS=Mus musculus GN=Tagln2 PE=1 SV=4	Tagln2	1.78177e+07	1.59174e+07	1.70992e+07	1.90476e+07	0	0	0	0
Q9D0J8	1	1	75.62	Parathymosin OS=Mus musculus GN=Ptms =1 SV=3	Ptms	1.78126e+07	1.84849e+07	1.59848e+07	1.69187e+07	0	0	0	0
P24547	4	4	242.37	Inosine-5'-monophosphate dehydrogenase 2 OS=Mus musculus GN=Impdh2 PE=1 SV=2	Impdh2	1.77371e+07	1.67019e+07	1.70711e+07	1.99983e+07	469098	469098	393436	342009
P24288	4	4	201.92	Branched-chain-amino-acid aminotransferase, cytosolic OS=Mus musculus GN=Bcat1 PE=1 SV=2	Bcat1	1.77159e+07	1.80102e+07	1.87549e+07	2.1608e+07	0	0	0	0
Q01853	9	9	575.84	Transitional endoplasmic reticulum ATPase OS=Mus musculus GN=Vcp PE=1 SV=4	Vcp	1.76789e+07	1.7587e+07	1.42241e+07	1.82029e+07	223.056	223.056	5885.64	0
P26043	9	9	448.63	Radixin OS=Mus musculus GN=Rdx =1 SV=3	Rdx	1.74975e+07	1.65797e+07	1.76278e+07	1.82153e+07	3.88868e+06	3.88868e+06	3.92604e+06	4.08044e+06
O08997	1	1	50.52	Copper transport protein ATOX1 OS=Mus musculus GN=Atox1 PE=1 SV=1	Atox1	1.74972e+07	1.51724e+07	1.64938e+07	2.07099e+07	0	0	0	0
Q93092	7	7	496.03	Transaldolase OS=Mus musculus GN=Taldo1 PE=1 SV=2	Taldo1	1.71335e+07	1.52414e+07	1.36763e+07	1.52616e+07	0	0	0	0
P18242	1	1	47.63	Cathepsin D OS=Mus musculus GN=Ctsd PE=1 SV=1	Ctsd	1.65633e+07	1.49567e+07	1.59932e+07	1.59222e+07	1.31648e+06	1.31648e+06	1.29407e+06	3.2688e+06
P56812	3	3	208.28	Programmed cell death protein 5 OS=Mus musculus GN=Pdcd5 PE=1 SV=3	Pdcd5	1.62907e+07	1.58946e+07	1.56168e+07	1.71138e+07	0	0	0	0
P53026	1	1	45.74	60S ribosomal protein L10a OS=Mus musculus GN=Rpl10a PE=1 SV=3	Rpl10a	1.61717e+07	1.58503e+07	1.39305e+07	1.58872e+07	2.69078e+06	2.69078e+06	2.22455e+06	2.47645e+06
Q9QXT0	3	3	176.2	Protein canopy homolog 2 OS=Mus musculus GN=Cnpy2 PE=1 SV=1	Cnpy2	1.61199e+07	1.72164e+07	1.32321e+07	1.60606e+07	3.12457e+06	3.12457e+06	2.50577e+06	2.28217e+06
Q9R1P4	3	3	132.99	Proteasome subunit alpha type-1 OS=Mus musculus GN=Psma1 PE=1 SV=1	Psma1	1.6039e+07	1.50272e+07	1.33013e+07	1.47619e+07	309937	309937	558806	560341
Q9QUM9	3	3	215.02	Proteasome subunit alpha type-6 OS=Mus musculus GN=Psma6 PE=1 SV=1	Psma6	1.59331e+07	1.64094e+07	1.54678e+07	1.59964e+07	1.87202e+06	1.87202e+06	1.79237e+06	1.31229e+06
P61982	1	1	112.29	14-3-3 protein gamma OS=Mus musculus GN=Ywhag PE=1 SV=2	Ywhag	1.58707e+07	1.89515e+07	1.92498e+07	2.06414e+07	2.48841e+06	2.48841e+06	2.20045e+06	706671
Q9CWF2	2	2	96.5	Tubulin beta-2B chain OS=Mus musculus GN=Tubb2b PE=1 SV=1	Tubb2b	1.56147e+07	1.57284e+07	1.47633e+07	1.53644e+07	0	0	0	0
P42932	9	9	579.3	T-complex protein 1 subunit theta OS=Mus musculus GN=Cct8 PE=1 SV=3	Cct8	1.53733e+07	1.64352e+07	1.35391e+07	1.61116e+07	1.74364e+06	1.74364e+06	1.1779e+06	1.2269e+06
P14152	2	2	142.87	Malate dehydrogenase, cytoplasmic OS=Mus musculus GN=Mdh1 PE=1 SV=3	Mdh1	1.5191e+07	1.66294e+07	1.42468e+07	1.76515e+07	0	0	0	0
Q8R317	3	3	253.61	Ubiquilin-1 OS=Mus musculus GN=Ubqln1 PE=1 SV=1	Ubqln1	1.51125e+07	1.32167e+07	1.67114e+07	1.64421e+07	3.19745e+06	3.19745e+06	2.3477e+06	2.45557e+06
Q9D1L0	2	2	127.31	Coiled-coil-helix-coiled-coil-helix domain-containing protein 2 OS=Mus musculus GN=Chchd2 PE=2 SV=1	Chchd2	1.50431e+07	1.64676e+07	1.53402e+07	1.42819e+07	1.18715e+07	1.18715e+07	1.05587e+07	1.04495e+07
Q61024	7	7	357.29	Asparagine synthetase [glutamine-hydrolyzing] OS=Mus musculus GN=Asns PE=1 SV=3	Asns	1.50151e+07	1.48693e+07	1.59796e+07	1.582e+07	0	0	0	0
O35685	4	4	212.58	Nuclear migration protein nudC OS=Mus musculus GN=Nudc PE=1 SV=1	Nudc	1.48937e+07	1.56393e+07	1.65489e+07	1.83322e+07	0	0	0	0
P62309	1	1	42.49	Small nuclear ribonucleoprotein G OS=Mus musculus GN=Snrpg =1 SV=1	Snrpg	1.48533e+07	1.15465e+07	1.47682e+07	1.41056e+07	2.56938e+07	2.56938e+07	3.28687e+07	4.32461e+07
Q9Z204	6	5	393.02	Heterogeneous nuclear ribonucleoproteins C1/C2 OS=Mus musculus GN=Hnrnpc =1 SV=1	Hnrnpc	1.46763e+07	1.26403e+07	1.17883e+07	1.44288e+07	5.12643e+08	5.12643e+08	4.86982e+08	4.64712e+08
Q9DBG5	3	3	220.12	Perilipin-3 OS=Mus musculus GN=Plin3 PE=1 SV=1	Plin3	1.46138e+07	1.45949e+07	1.35721e+07	1.22173e+07	0	0	0	0
P27546	3	3	187.02	Microtubule-associated protein 4 OS=Mus musculus GN=Map4 =1 SV=3	Map4	1.43092e+07	1.35076e+07	1.46983e+07	1.56206e+07	7.38236e+06	7.38236e+06	7.21479e+06	8.51201e+06
P62075	4	4	251.42	Mitochondrial import inner membrane translocase subunit Tim13 OS=Mus musculus GN=Timm13 =1 SV=1	Timm13	1.41967e+07	1.37304e+07	1.39816e+07	1.4882e+07	1.5121e+07	1.5121e+07	1.6376e+07	2.17567e+07
P99026	2	2	103.08	Proteasome subunit beta type-4 OS=Mus musculus GN=Psmb4 PE=1 SV=1	Psmb4	1.41214e+07	1.45382e+07	1.38428e+07	1.38772e+07	0	0	0	0
P57780	9	9	513.18	Alpha-actinin-4 OS=Mus musculus GN=Actn4 PE=1 SV=1	Actn4	1.41144e+07	1.39784e+07	1.33149e+07	1.28181e+07	5.19457e+06	5.19457e+06	6.11843e+06	6.82751e+06
Q9Z1N5	10	9	599.75	Spliceosome RNA helicase Ddx39b OS=Mus musculus GN=Ddx39b =1 SV=1	Ddx39b	1.40875e+07	1.28119e+07	1.27852e+07	1.57073e+07	4.07825e+07	4.07825e+07	4.09674e+07	4.61644e+07
P28474	1	1	45.3	Alcohol dehydrogenase class-3 OS=Mus musculus GN=Adh5 PE=1 SV=3	Adh5	1.40731e+07	1.20192e+07	1.19726e+07	1.44917e+07	0	0	0	0
Q60972	3	3	122.98	Histone-binding protein RBBP4 OS=Mus musculus GN=Rbbp4 =1 SV=5	Rbbp4	1.37022e+07	1.41891e+07	1.08242e+07	1.34748e+07	6.94466e+07	6.94466e+07	8.58296e+07	1.22001e+08
P62852	1	1	51.65	40S ribosomal protein S25 OS=Mus musculus GN=Rps25 PE=1 SV=1	Rps25	1.36344e+07	1.61103e+07	1.59012e+07	1.63523e+07	4.9678e+06	4.9678e+06	3.95428e+06	3.01565e+06
P62827	1	1	64.78	GTP-binding nuclear protein Ran OS=Mus musculus GN=Ran =1 SV=3	Ran	1.35383e+07	1.38512e+07	1.06869e+07	1.12831e+07	2.93791e+07	2.93791e+07	2.71744e+07	3.03437e+07
Q9D3D9	1	1	45.45	ATP synthase subunit delta, mitochondrial OS=Mus musculus GN=Atp5d PE=1 SV=1	Atp5d	1.3495e+07	1.12794e+07	1.02902e+07	1.38477e+07	2.78098e+06	2.78098e+06	2.72988e+06	2.94588e+06
P54728	9	9	411.33	UV excision repair protein RAD23 homolog B OS=Mus musculus GN=Rad23b =1 SV=2	Rad23b	1.3442e+07	1.40401e+07	1.22742e+07	1.48754e+07	310745	310745	354000	305954
Q9DCN2	6	6	507.35	NADH-cytochrome b5 reductase 3 OS=Mus musculus GN=Cyb5r3 =1 SV=3	Cyb5r3	1.34073e+07	1.3161e+07	1.13457e+07	7.82422e+06	0	0	0	0
Q9DAR7	1	1	64.51	m7GpppX diphosphatase OS=Mus musculus GN=Dcps PE=1 SV=1	Dcps	1.3221e+07	1.27934e+07	1.40361e+07	1.26797e+07	0	0	0	0
O55135	1	1	116.54	Eukaryotic translation initiation factor 6 OS=Mus musculus GN=Eif6 PE=1 SV=2	Eif6	1.31692e+07	1.52242e+07	1.40149e+07	1.58332e+07	2.91315e+06	2.91315e+06	2.62146e+06	2.74707e+06
Q9CWZ3	2	2	163.76	RNA-binding protein 8A OS=Mus musculus GN=Rbm8a =1 SV=4	Rbm8a	1.31167e+07	1.38841e+07	2.41451e+06	892057	2.38364e+07	2.38364e+07	1.81859e+07	1.63127e+07
P68510	3	3	215.94	14-3-3 protein eta OS=Mus musculus GN=Ywhah PE=1 SV=2	Ywhah	1.30092e+07	1.51428e+07	1.23583e+07	1.69898e+07	0	0	0	0
Q91WJ8	12	12	702.7	Far upstream element-binding protein 1 OS=Mus musculus GN=Fubp1 =1 SV=1	Fubp1	1.29646e+07	1.175e+07	1.18079e+07	1.29223e+07	3.64181e+07	3.64181e+07	2.99107e+07	5.8894e+07
Q9WTP6	5	5	254.94	Adenylate kinase 2, mitochondrial OS=Mus musculus GN=Ak2 PE=1 SV=5	Ak2	1.27003e+07	1.35439e+07	1.31677e+07	1.39433e+07	8.65565e+06	8.65565e+06	7.38229e+06	7.08647e+06
Q9CPU0	5	5	261.08	Lactoylglutathione lyase OS=Mus musculus GN=Glo1 PE=1 SV=3	Glo1	1.26763e+07	1.29206e+07	1.15053e+07	1.40357e+07	122271	122271	148073	156227
P23198	4	4	217.33	Chromobox protein homolog 3 OS=Mus musculus GN=Cbx3 =1 SV=2	Cbx3	1.25781e+07	1.2052e+07	1.19423e+07	1.31173e+07	3.97538e+07	3.97538e+07	3.70021e+07	3.39546e+07
Q9CWJ9	8	8	467.82	Bifunctional purine biosynthesis protein PURH OS=Mus musculus GN=Atic PE=1 SV=2	Atic	1.25181e+07	1.16401e+07	1.24665e+07	1.1e+07	0	0	0	0
Q9QUR7	3	3	140.34	Peptidyl-prolyl cis-trans isomerase NIMA-interacting 1 OS=Mus musculus GN=Pin1 PE=1 SV=1	Pin1	1.2318e+07	1.13291e+07	1.11611e+07	1.28226e+07	2.18971e+06	2.18971e+06	1.86568e+06	1.95512e+06
P63323	5	5	304.26	40S ribosomal protein S12 OS=Mus musculus GN=Rps12 =1 SV=2	Rps12	1.23042e+07	1.1873e+07	1.05741e+07	1.22678e+07	1.0864e+07	1.0864e+07	1.77263e+07	1.70647e+07
Q9R1P0	2	2	150.33	Proteasome subunit alpha type-4 OS=Mus musculus GN=Psma4 PE=1 SV=1	Psma4	1.22933e+07	1.30982e+07	1.2317e+07	1.2183e+07	555557	555557	540327	705145
Q07813	1	1	113.15	Apoptosis regulator BAX OS=Mus musculus GN=Bax PE=1 SV=1	Bax	1.22619e+07	1.23053e+07	1.16295e+07	1.27946e+07	387647	387647	587720	720518
P83940	3	3	143.11	Transcription elongation factor B polypeptide 1 OS=Mus musculus GN=Tceb1 PE=1 SV=1	Tceb1	1.22289e+07	1.31932e+07	1.2855e+07	1.37473e+07	4.52918e+06	4.52918e+06	2.87866e+06	3.51956e+06
P62301	1	1	43.33	40S ribosomal protein S13 OS=Mus musculus GN=Rps13 PE=1 SV=2	Rps13	1.20948e+07	1.16602e+07	1.29889e+07	1.31365e+07	5831.73	5831.73	818945	458891
Q9JMH6	5	5	254.79	Thioredoxin reductase 1, cytoplasmic OS=Mus musculus GN=Txnrd1 PE=1 SV=3	Txnrd1	1.20368e+07	1.09636e+07	9.98989e+06	1.04678e+07	209290	209290	171241	97120.2
P97822	1	1	41.41	Acidic leucine-rich nuclear phosphoprotein 32 family member E OS=Mus musculus GN=Anp32e PE=1 SV=2	Anp32e	1.19653e+07	1.09039e+07	1.23855e+07	1.28431e+07	0	0	0	0
Q61166	1	1	56.58	Microtubule-associated protein RP/EB family member 1 OS=Mus musculus GN=Mapre1 PE=1 SV=3	Mapre1	1.18988e+07	1.20075e+07	1.07348e+07	1.16892e+07	1.26348e+06	1.26348e+06	1.10807e+06	1.23901e+06
P52293	9	9	563.6	Importin subunit alpha-1 OS=Mus musculus GN=Kpna2 =1 SV=2	Kpna2	1.18877e+07	1.04264e+07	1.26329e+07	1.13299e+07	1.22643e+07	1.22643e+07	1.08242e+07	1.22799e+07
P62908	10	10	533.84	40S ribosomal protein S3 OS=Mus musculus GN=Rps3 =1 SV=1	Rps3	1.18857e+07	1.07313e+07	1.25733e+07	1.26299e+07	2.303e+07	2.303e+07	2.36926e+07	2.20572e+07
P17225	4	4	173.76	Polypyrimidine tract-binding protein 1 OS=Mus musculus GN=Ptbp1 =1 SV=2	Ptbp1	1.18434e+07	1.12039e+07	1.30473e+07	1.23176e+07	3.65183e+08	3.65183e+08	3.98376e+08	3.61552e+08
P61290	7	7	522.27	Proteasome activator complex subunit 3 OS=Mus musculus GN=Psme3 =1 SV=1	Psme3	1.17591e+07	1.22022e+07	1.26589e+07	1.26368e+07	0	0	0	0
Q60872	1	1	38.64	Eukaryotic translation initiation factor 1A OS=Mus musculus GN=Eif1a =2 SV=3	Eif1a	1.17428e+07	1.05098e+07	1.15597e+07	1.37748e+07	0	0	0	0
P63242	3	3	139.46	Eukaryotic translation initiation factor 5A-1 OS=Mus musculus GN=Eif5a PE=1 SV=2	Eif5a	1.16454e+07	1.10864e+07	1.54426e+07	1.38964e+07	575082	575082	2.90008e+06	3.08826e+06
P80315	3	3	197.01	T-complex protein 1 subunit delta OS=Mus musculus GN=Cct4 PE=1 SV=3	Cct4	1.16359e+07	1.40269e+07	1.12948e+07	1.22388e+07	2.34027e+06	2.34027e+06	2.31694e+06	1.99671e+06
O88477	11	11	575.31	Insulin-like growth factor 2 mRNA-binding protein 1 OS=Mus musculus GN=Igf2bp1 =1 SV=1	Igf2bp1	1.14243e+07	1.22338e+07	1.18859e+07	1.30391e+07	1.1414e+08	1.1414e+08	1.24447e+08	1.08629e+08
P26883	2	2	210.15	Peptidyl-prolyl cis-trans isomerase FKBP1A OS=Mus musculus GN=Fkbp1a PE=1 SV=2	Fkbp1a	1.14126e+07	1.15847e+07	1.16995e+07	1.5383e+07	27253.8	27253.8	493053	409593
P97450	1	1	41.11	ATP synthase-coupling factor 6, mitochondrial OS=Mus musculus GN=Atp5j PE=1 SV=1	Atp5j	1.13672e+07	1.17429e+07	1.22788e+07	1.22915e+07	0	0	0	0
Q8BG05	4	4	342.98	Heterogeneous nuclear ribonucleoprotein A3 OS=Mus musculus GN=Hnrnpa3 =1 SV=1	Hnrnpa3	1.131e+07	1.31335e+07	1.29353e+07	1.35508e+07	4.82596e+08	4.82596e+08	4.35542e+08	4.55967e+08
Q60973	9	9	455.55	Histone-binding protein RBBP7 OS=Mus musculus GN=Rbbp7 =1 SV=1	Rbbp7	1.10999e+07	1.22546e+07	9.9622e+06	1.206e+07	2.41323e+07	2.41323e+07	1.97037e+07	1.93382e+07
P05202	8	8	460.3	Aspartate aminotransferase, mitochondrial OS=Mus musculus GN=Got2 PE=1 SV=1	Got2	1.10408e+07	1.15716e+07	9.94515e+06	1.24426e+07	1.08741e+07	1.08741e+07	8.77489e+06	1.01291e+07
Q6P4T2	57	57	3834.58	U5 small nuclear ribonucleoprotein 200 kDa helicase OS=Mus musculus GN=Snrnp200 PE=1 SV=1	Snrnp200	1.07902e+07	1.07902e+07	1.31941e+07	1.53528e+07	0	0	0	0
P35980	5	5	301.39	60S ribosomal protein L18 OS=Mus musculus GN=Rpl18 PE=1 SV=3	Rpl18	1.06172e+07	1.05603e+07	1.11003e+07	9.42844e+06	0	0	0	0
Q99L47	8	8	443.58	Hsc70-interacting protein OS=Mus musculus GN=St13 PE=1 SV=1	St13	1.05482e+07	8.57127e+06	7.88847e+06	9.41518e+06	684445	684445	617595	284510
Q9DCX2	5	5	304.1	ATP synthase subunit d, mitochondrial OS=Mus musculus GN=Atp5h =1 SV=3	Atp5h	1.04647e+07	1.05137e+07	1.07005e+07	1.01297e+07	0	0	0	0
Q8K310	8	8	499.7	Matrin-3 OS=Mus musculus GN=Matr3 =1 SV=1	Matr3	1.03857e+07	7.74136e+06	1.0217e+07	8.48938e+06	1.31121e+08	1.31121e+08	1.43452e+08	1.65938e+08
Q922Q8	6	6	414.46	Leucine-rich reat-containing protein 59 OS=Mus musculus GN=Lrrc59 =1 SV=1	Lrrc59	1.0365e+07	1.01823e+07	1.17915e+07	1.15984e+07	3.16959e+06	3.16959e+06	3.03467e+06	3.45184e+06
P50247	9	9	567.92	Adenosylhomocysteinase OS=Mus musculus GN=Ahcy PE=1 SV=3	Ahcy	1.03045e+07	1.10413e+07	1.09054e+07	1.25414e+07	0	0	0	0
Q9CXW3	1	1	49.11	Calcyclin-binding protein OS=Mus musculus GN=Cacybp PE=1 SV=1	Cacybp	1.02997e+07	1.19978e+07	1.08521e+07	1.19223e+07	0	0	0	0
P26638	1	1	56.38	Serine--tRNA ligase, cytoplasmic OS=Mus musculus GN=Sars PE=1 SV=3	Sars	1.02852e+07	9.48769e+06	9.3796e+06	8.98861e+06	0	0	0	0
Q9D051	3	3	150.54	Pyruvate dehydrogenase E1 component subunit beta, mitochondrial OS=Mus musculus GN=Pdhb PE=1 SV=1	Pdhb	1.02732e+07	9.72584e+06	1.1423e+07	1.0294e+07	8.154e+06	8.154e+06	7.31355e+06	7.06822e+06
Q9CQN3	1	1	39.19	Mitochondrial import receptor subunit TOM6 homolog OS=Mus musculus GN=Tomm6 =3 SV=1	Tomm6	1.02595e+07	1.01146e+07	1.07504e+07	8.48024e+06	0	0	0	0
Q99PV0	53	53	2951.81	Pre-mRNA-processing-splicing factor 8 OS=Mus musculus GN=Prpf8 PE=1 SV=2	Prpf8	1.0246e+07	1.0246e+07	1.10606e+07	9.70819e+06	0	0	0	0
P63163	1	1	57.72	Small nuclear ribonucleoprotein-associated protein N OS=Mus musculus GN=Snrpn PE=1 SV=1	Snrpn	1.01554e+07	9.61514e+06	8.74131e+06	9.89124e+06	0	0	0	0
Q9R0P5	1	1	75.78	Destrin OS=Mus musculus GN=Dstn PE=1 SV=3	Dstn	1.01286e+07	8.74961e+06	7.44381e+06	9.48866e+06	187803	187803	187691	312253
Q9CXW4	2	2	132.72	60S ribosomal protein L11 OS=Mus musculus GN=Rpl11 PE=1 SV=4	Rpl11	1.01216e+07	1.1937e+07	9.68641e+06	1.15049e+07	7.72495e+06	7.72495e+06	5.86075e+06	5.61736e+06
P10711	1	1	78.2	Transcription elongation factor A protein 1 OS=Mus musculus GN=Tcea1 PE=1 SV=2	Tcea1	1.00056e+07	9.38228e+06	1.01415e+07	1.02723e+07	4.81302e+06	4.81302e+06	3.20041e+06	4.50801e+06
P62751	2	2	108	60S ribosomal protein L23a OS=Mus musculus GN=Rpl23a PE=1 SV=1	Rpl23a	9.99466e+06	9.46884e+06	1.01412e+07	1.07083e+07	2.3001e+06	2.3001e+06	1.98299e+06	1.63766e+06
O09061	1	1	43.11	Proteasome subunit beta type-1 OS=Mus musculus GN=Psmb1 PE=1 SV=1	Psmb1	9.94219e+06	1.34731e+07	8.75025e+06	1.23312e+07	1.16579e+06	1.16579e+06	1.48478e+06	0
O54962	2	2	100.91	Barrier-to-autointegration factor OS=Mus musculus GN=Banf1 =1 SV=1	Banf1	9.85244e+06	8.12236e+06	9.73062e+06	8.80829e+06	2.59852e+06	2.59852e+06	2.538e+06	1.78198e+06
O70591	4	4	260.71	Prefoldin subunit 2 OS=Mus musculus GN=Pfdn2 PE=1 SV=2	Pfdn2	9.79433e+06	9.79755e+06	8.50218e+06	1.01294e+07	258776	258776	0	0
Q9JII6	3	3	159.11	Alcohol dehydrogenase [NADP(+)] OS=Mus musculus GN=Akr1a1 PE=1 SV=3	Akr1a1	9.67587e+06	8.99361e+06	9.28787e+06	9.50151e+06	0	0	0	0
Q8VEK3	11	11	784.48	Heterogeneous nuclear ribonucleoprotein U OS=Mus musculus GN=Hnrnpu =1 SV=1	Hnrnpu	9.67365e+06	1.04379e+07	9.47689e+06	1.10509e+07	4.15937e+08	4.15937e+08	3.93204e+08	2.566e+08
P56212	2	2	99.25	cAMP-regulated phosphoprotein 19 OS=Mus musculus GN=Arpp19 =1 SV=2	Arpp19	9.65521e+06	1.20238e+07	1.1983e+07	1.18407e+07	0	0	0	0
P19157	3	3	187.8	Glutathione S-transferase P 1 OS=Mus musculus GN=Gstp1 PE=1 SV=2	Gstp1	9.63507e+06	9.77211e+06	1.11906e+07	1.05935e+07	0	0	0	0
Q62446	5	5	221.29	ptidyl-prolyl cis-trans isomerase FKBP3 OS=Mus musculus GN=Fkbp3 =1 SV=2	Fkbp3	9.58611e+06	9.04068e+06	9.85065e+06	1.04754e+07	1.69424e+07	1.69424e+07	2.07628e+07	1.47645e+07
P60335	7	7	372.35	Poly(rC)-binding protein 1 OS=Mus musculus GN=Pcbp1 =1 SV=1	Pcbp1	9.57998e+06	8.84587e+06	8.905e+06	8.91366e+06	1.45173e+07	1.45173e+07	1.69663e+07	1.88447e+07
O70435	3	3	176.42	Proteasome subunit alpha type-3 OS=Mus musculus GN=Psma3 PE=1 SV=3	Psma3	9.57955e+06	9.9261e+06	9.56259e+06	1.15176e+07	0	0	0	0
Q8BK67	15	15	1031.63	Protein RCC2 OS=Mus musculus GN=Rcc2 =1 SV=1	Rcc2	9.57823e+06	8.64454e+06	8.15164e+06	8.9174e+06	1.48857e+07	1.48857e+07	1.43214e+07	1.68482e+07
Q9D1J3	10	10	775.12	SAP domain-containing ribonucleoprotein OS=Mus musculus GN=Sarnp =1 SV=3	Sarnp	9.57795e+06	9.24933e+06	8.45068e+06	9.58801e+06	3.81199e+07	3.81199e+07	3.48679e+07	3.12436e+07
Q60692	4	4	243.45	Proteasome subunit beta type-6 OS=Mus musculus GN=Psmb6 PE=1 SV=3	Psmb6	9.53502e+06	1.16662e+07	1.14258e+07	1.25895e+07	581699	581699	634316	747244
O35900	2	2	227.29	U6 snRNA-associated Sm-like protein LSm2 OS=Mus musculus GN=Lsm2 =1 SV=1	Lsm2	9.49112e+06	9.76953e+06	1.12674e+07	8.82563e+06	1.44409e+07	1.44409e+07	1.52837e+07	1.44717e+07
Q61553	6	6	409.8	Fascin OS=Mus musculus GN=Fscn1 PE=1 SV=4	Fscn1	9.4324e+06	9.86695e+06	1.16302e+07	1.06193e+07	0	0	0	0
Q3THS6	4	4	265.77	S-adenosylmethionine synthase isoform type-2 OS=Mus musculus GN=Mat2a PE=1 SV=2	Mat2a	9.37442e+06	8.91757e+06	8.29435e+06	8.68195e+06	0	0	0	0
P62889	1	1	73.64	60S ribosomal protein L30 OS=Mus musculus GN=Rpl30 PE=1 SV=2	Rpl30	9.36472e+06	9.96007e+06	9.21011e+06	8.93751e+06	2.08311e+06	2.08311e+06	1.65287e+06	1.65235e+06
Q06185	2	2	101.83	ATP synthase subunit e, mitochondrial OS=Mus musculus GN=Atp5i PE=1 SV=2	Atp5i	9.21442e+06	1.07353e+07	9.16572e+06	1.09236e+07	0	0	0	0
P18572	5	5	296.03	Basigin OS=Mus musculus GN=Bsg =1 SV=2	Bsg	9.07049e+06	9.32105e+06	7.63868e+06	9.10898e+06	0	0	0	0
P51150	1	1	53.52	Ras-related protein Rab-7a OS=Mus musculus GN=Rab7a PE=1 SV=2	Rab7a	8.98412e+06	9.30443e+06	9.72045e+06	9.27985e+06	4.52938e+06	4.52938e+06	4.48988e+06	4.08798e+06
P20108	2	2	172.68	Thioredoxin-dependent peroxide reductase, mitochondrial OS=Mus musculus GN=Prdx3 PE=1 SV=1	Prdx3	8.98022e+06	6.2139e+06	5.03771e+06	5.79763e+06	2.46104e+06	2.46104e+06	2.61297e+06	2.87616e+06
Q64213	6	6	281.26	Splicing factor 1 OS=Mus musculus GN=Sf1 =1 SV=6	Sf1	8.97628e+06	8.83514e+06	8.90515e+06	6.83986e+06	2.771e+07	2.771e+07	2.76578e+07	3.17639e+07
Q99JB2	5	5	322.18	Stomatin-like protein 2, mitochondrial OS=Mus musculus GN=Stoml2 =1 SV=1	Stoml2	8.95241e+06	9.15109e+06	8.80164e+06	8.65424e+06	0	0	0	0
Q9JKR6	3	3	151.26	Hypoxia up-regulated protein 1 OS=Mus musculus GN=Hyou1 PE=1 SV=1	Hyou1	8.90309e+06	6.55048e+06	8.62788e+06	8.97249e+06	7.42468e+06	7.42468e+06	8.42413e+06	9.43912e+06
P97855	4	4	206.59	Ras GTPase-activating protein-binding protein 1 OS=Mus musculus GN=G3bp1 =1 SV=1	G3bp1	8.86424e+06	8.79402e+06	8.33509e+06	9.62932e+06	5.82177e+07	5.82177e+07	4.72158e+07	5.47736e+07
P08003	3	3	181.48	Protein disulfide-isomerase A4 OS=Mus musculus GN=Pdia4 PE=1 SV=3	Pdia4	8.86405e+06	7.10894e+06	6.42517e+06	8.84668e+06	3.07477e+06	3.07477e+06	4.17143e+06	4.87033e+06
O08528	25	25	1650.19	Hexokinase-2 OS=Mus musculus GN=Hk2 PE=1 SV=1	Hk2	8.84003e+06	8.84003e+06	8.44407e+06	9.21919e+06	0	0	0	0
P62500	1	1	52.02	TSC22 domain family protein 1 OS=Mus musculus GN=Tsc22d1 =1 SV=2	Tsc22d1	8.75097e+06	8.1345e+06	8.65065e+06	9.07169e+06	0	0	0	0
Q62084	1	1	41.72	Protein phosphatase 1 regulatory subunit 14B OS=Mus musculus GN=Ppp1r14b =1 SV=2	Ppp1r14b	8.7494e+06	9.40095e+06	9.64236e+06	1.11598e+07	0	0	0	0
P62821	2	1	125.9	Ras-related protein Rab-1A OS=Mus musculus GN=Rab1A PE=1 SV=3	Rab1A	8.66411e+06	7.55376e+06	9.38273e+06	7.265e+06	1.23793e+06	1.23793e+06	1.35366e+06	1.47136e+06
Q8BG32	1	1	72.74	26S proteasome non-ATPase regulatory subunit 11 OS=Mus musculus GN=Psmd11 PE=1 SV=3	Psmd11	8.63029e+06	7.96518e+06	9.45936e+06	9.19963e+06	0	0	0	0
Q62393	2	2	111.59	Tumor protein D52 OS=Mus musculus GN=Tpd52 PE=1 SV=2	Tpd52	8.61861e+06	1.12572e+07	1.00436e+07	1.14718e+07	0	0	0	0
P62315	1	1	110.69	Small nuclear ribonucleoprotein Sm D1 OS=Mus musculus GN=Snrpd1 =1 SV=1	Snrpd1	8.60492e+06	8.35957e+06	7.52353e+06	1.04796e+07	7.28862e+07	7.28862e+07	5.90925e+07	6.28076e+07
P60122	11	11	615	RuvB-like 1 OS=Mus musculus GN=Ruvbl1 =1 SV=1	Ruvbl1	8.54076e+06	8.65464e+06	9.51724e+06	9.16146e+06	1.31283e+07	1.31283e+07	1.61699e+07	2.88951e+07
P68368	2	2	177.61	Tubulin alpha-4A chain OS=Mus musculus GN=Tuba4a =1 SV=1	Tuba4a	8.50953e+06	7.85899e+06	7.50824e+06	6.35838e+06	0	0	0	0
Q9QZM0	1	1	68.62	Ubiquilin-2 OS=Mus musculus GN=Ubqln2 PE=1 SV=2	Ubqln2	8.43666e+06	8.30471e+06	8.01918e+06	8.94438e+06	720440	720440	544497	483747
P26516	1	1	43.6	26S proteasome non-ATPase regulatory subunit 7 OS=Mus musculus GN=Psmd7 PE=1 SV=2	Psmd7	8.34373e+06	8.7476e+06	8.5419e+06	1.01056e+07	0	0	292532	0
Q9CZU6	6	6	401.32	Citrate synthase, mitochondrial OS=Mus musculus GN=Cs =1 SV=1	Cs	8.33645e+06	9.53053e+06	9.30833e+06	9.71633e+06	1.27399e+07	1.27399e+07	1.4062e+07	1.66792e+07
P60867	4	3	297.02	40S ribosomal protein S20 OS=Mus musculus GN=Rps20 =1 SV=1	Rps20	8.30119e+06	7.27315e+06	6.00287e+06	7.27597e+06	9.784e+06	9.784e+06	1.18689e+07	1.38615e+07
O88271	2	2	125.57	Craniofacial development protein 1 OS=Mus musculus GN=Cfdp1 PE=1 SV=1	Cfdp1	8.27926e+06	9.28223e+06	8.61263e+06	9.55757e+06	447214	447214	830764	800395
P68254	5	5	255.77	14-3-3 protein theta OS=Mus musculus GN=Ywhaq =1 SV=1	Ywhaq	8.2735e+06	8.49935e+06	8.3248e+06	9.17147e+06	2.79559e+06	2.79559e+06	1.95112e+06	2.15477e+06
Q76MZ3	3	3	158.51	Serine/threonine-protein phosphatase 2A 65 kDa regulatory subunit A alpha isoform OS=Mus musculus GN=Ppp2r1a PE=1 SV=3	Ppp2r1a	8.22854e+06	8.34357e+06	7.69248e+06	1.00086e+07	2.68733e+06	2.68733e+06	3.4528e+06	3.54366e+06
P62320	3	3	161.66	Small nuclear ribonucleoprotein Sm D3 OS=Mus musculus GN=Snrpd3 =1 SV=1	Snrpd3	8.21238e+06	7.12956e+06	7.0303e+06	7.04055e+06	6.40431e+07	6.40431e+07	5.82193e+07	5.92392e+07
P61089	1	1	46.61	Ubiquitin-conjugating enzyme E2 N OS=Mus musculus GN=Ube2n PE=1 SV=1	Ube2n	8.11381e+06	7.76509e+06	7.31965e+06	8.64887e+06	17585.4	17585.4	73857.7	86620.2
P80316	5	5	309.49	T-complex protein 1 subunit epsilon OS=Mus musculus GN=Cct5 PE=1 SV=1	Cct5	7.98498e+06	7.92878e+06	8.6151e+06	8.66422e+06	3.41898e+06	3.41898e+06	3.78144e+06	3.24337e+06
P26041	2	2	112.78	Moesin OS=Mus musculus GN=Msn PE=1 SV=3	Msn	7.95997e+06	8.02321e+06	7.41827e+06	6.16982e+06	190620	190620	151303	170431
P62849	1	1	43.11	40S ribosomal protein S24 OS=Mus musculus GN=Rps24 PE=1 SV=1	Rps24	7.93964e+06	8.01421e+06	9.50654e+06	9.7719e+06	0	0	472542	571774
Q9R257	2	2	106.43	Heme-binding protein 1 OS=Mus musculus GN=Hebp1 PE=1 SV=2	Hebp1	7.93924e+06	7.30012e+06	7.4526e+06	7.96974e+06	14804.5	14804.5	46666	68780.2
Q9JKB1	4	4	259.53	Ubiquitin carboxyl-terminal hydrolase isozyme L3 OS=Mus musculus GN=Uchl3 PE=1 SV=2	Uchl3	7.9137e+06	8.68672e+06	8.451e+06	6.43344e+06	0	0	0	0
Q9CR16	3	3	161.14	Peptidyl-prolyl cis-trans isomerase D OS=Mus musculus GN=Ppid PE=1 SV=3	Ppid	7.88562e+06	6.77094e+06	7.75409e+06	8.63515e+06	0	0	116372	143768
P62307	1	1	68.46	Small nuclear ribonucleoprotein F OS=Mus musculus GN=Snrpf =1 SV=1	Snrpf	7.87674e+06	1.03082e+07	9.46569e+06	1.20448e+07	1.96711e+07	1.96711e+07	1.36229e+07	1.37037e+07
Q9R0P9	1	1	57.35	Ubiquitin carboxyl-terminal hydrolase isozyme L1 OS=Mus musculus GN=Uchl1 PE=1 SV=1	Uchl1	7.84753e+06	8.46687e+06	8.29107e+06	1.04692e+07	0	0	0	0
Q3UM45	4	4	264.65	Protein phosphatase 1 regulatory subunit 7 OS=Mus musculus GN=Ppp1r7 PE=1 SV=2	Ppp1r7	7.81422e+06	7.3586e+06	7.90414e+06	7.58056e+06	0	0	0	0
O70400	2	2	119.73	PDZ and LIM domain protein 1 OS=Mus musculus GN=Pdlim1 PE=1 SV=4	Pdlim1	7.79429e+06	9.04402e+06	8.31825e+06	9.88406e+06	0	0	0	0
Q9WTM5	10	10	542.33	RuvB-like 2 OS=Mus musculus GN=Ruvbl2 =1 SV=3	Ruvbl2	7.78337e+06	7.98814e+06	8.20486e+06	8.35243e+06	1.72094e+07	1.72094e+07	1.66891e+07	8.68298e+06
P67984	3	3	328.83	60S ribosomal protein L22 OS=Mus musculus GN=Rpl22 PE=1 SV=2	Rpl22	7.78149e+06	7.26102e+06	6.14308e+06	7.70037e+06	2.06415e+06	2.06415e+06	1.96997e+06	2.03809e+06
Q9CY58	4	4	246.82	Plasminogen activator inhibitor 1 RNA-binding protein OS=Mus musculus GN=Serbp1 =1 SV=2	Serbp1	7.7596e+06	7.76548e+06	9.0687e+06	9.37071e+06	2.2327e+07	2.2327e+07	2.87405e+07	2.34803e+07
P62627	1	1	73.88	Dynein light chain roadblock-type 1 OS=Mus musculus GN=Dynlrb1 PE=1 SV=3	Dynlrb1	7.71715e+06	6.81799e+06	7.69145e+06	8.03224e+06	2.15855e+06	2.15855e+06	767557	633091
Q923D2	3	3	142.65	Flavin reductase (NADPH) OS=Mus musculus GN=Blvrb PE=1 SV=3	Blvrb	7.68007e+06	7.49551e+06	7.42933e+06	8.5539e+06	0	0	0	0
P50580	8	8	426.04	Proliferation-associated protein 2G4 OS=Mus musculus GN=Pa2g4 =1 SV=3	Pa2g4	7.62263e+06	8.61003e+06	9.15884e+06	9.16125e+06	8.26334e+07	8.26334e+07	4.8709e+07	5.05884e+07
P80317	3	3	156.09	T-complex protein 1 subunit zeta OS=Mus musculus GN=Cct6a PE=1 SV=3	Cct6a	7.57956e+06	7.55756e+06	1.02988e+07	9.00259e+06	3.86373e+06	3.86373e+06	3.48015e+06	1.91413e+06
P10639	1	1	52.01	Thioredoxin OS=Mus musculus GN=Txn PE=1 SV=3	Txn	7.51327e+06	8.31984e+06	5.03968e+06	7.52865e+06	0	0	0	0
Q99P72	6	6	292.97	Reticulon-4 OS=Mus musculus GN=Rtn4 =1 SV=2	Rtn4	7.50867e+06	6.99625e+06	6.05565e+06	6.64124e+06	2.0234e+06	2.0234e+06	1.54744e+06	1.81091e+06
Q60865	4	4	214.29	Caprin-1 OS=Mus musculus GN=Caprin1 =1 SV=2	Caprin1	7.49653e+06	7.57948e+06	6.84247e+06	8.77116e+06	2.59751e+07	2.59751e+07	2.44024e+07	2.45594e+07
Q9D0T1	2	2	95.9	NHP2-like protein 1 OS=Mus musculus GN=Snu13 =1 SV=4	Snu13	7.45205e+06	6.86127e+06	7.62121e+06	7.52169e+06	1.48471e+07	1.48471e+07	1.14946e+07	1.13038e+07
Q62093	3	3	178.29	Serine/arginine-rich splicing factor 2 OS=Mus musculus GN=Srsf2 =1 SV=4	Srsf2	7.43639e+06	7.53834e+06	6.92243e+06	7.8988e+06	3.45773e+07	3.45773e+07	3.20746e+07	1.64624e+07
Q61207	1	1	69.56	Prosaposin OS=Mus musculus GN=Psap PE=1 SV=2	Psap	7.41184e+06	6.13889e+06	5.553e+06	6.21137e+06	827497	827497	1.2283e+06	1.48847e+06
Q9CQL7	2	2	128.48	MORF4 family-associated protein 1 OS=Mus musculus GN=Mrfap1 =1 SV=1	Mrfap1	7.39866e+06	7.77147e+06	7.8908e+06	9.009e+06	1.04344e+07	1.04344e+07	8.12225e+06	7.03632e+06
P97461	1	1	48.57	40S ribosomal protein S5 OS=Mus musculus GN=Rps5 PE=1 SV=3	Rps5	7.37433e+06	1.01609e+07	1.07337e+07	9.42991e+06	1.26171e+06	1.26171e+06	1.37846e+06	1.58377e+06
P24369	3	3	165.02	ptidyl-prolyl cis-trans isomerase B OS=Mus musculus GN=Ppib =1 SV=2	Ppib	7.36705e+06	7.572e+06	7.18205e+06	8.04039e+06	2.24448e+07	2.24448e+07	2.18811e+07	3.04935e+07
Q3U1J4	3	3	175.17	DNA damage-binding protein 1 OS=Mus musculus GN=Ddb1 PE=1 SV=2	Ddb1	7.32236e+06	7.58792e+06	6.79782e+06	8.30943e+06	1.47205e+06	1.47205e+06	1.22438e+06	1.13368e+06
P31230	4	4	221.92	Aminoacyl tRNA synthase complex-interacting multifunctional protein 1 OS=Mus musculus GN=Aimp1 =1 SV=2	Aimp1	7.28002e+06	6.43866e+06	7.42452e+06	9.39513e+06	1.52855e+06	1.52855e+06	1.23605e+06	1.53306e+06
Q8VCN5	1	1	42.04	Cystathionine gamma-lyase OS=Mus musculus GN=Cth PE=1 SV=1	Cth	7.26396e+06	6.25723e+06	7.08471e+06	6.69898e+06	0	0	0	0
O88844	3	3	245.93	Isocitrate dehydrogenase [NADP] cytoplasmic OS=Mus musculus GN=Idh1 PE=1 SV=2	Idh1	7.24536e+06	7.46265e+06	8.14674e+06	7.6006e+06	0	0	74977.4	0
Q80X50	5	5	312.49	Ubiquitin-associated protein 2-like OS=Mus musculus GN=Ubap2l =1 SV=1	Ubap2l	7.23765e+06	7.62816e+06	6.32645e+06	8.14242e+06	4.95111e+06	4.95111e+06	5.44353e+06	3.17239e+06
P06151	2	2	105.95	L-lactate dehydrogenase A chain OS=Mus musculus GN=Ldha PE=1 SV=3	Ldha	7.21207e+06	6.71323e+06	5.34987e+06	6.74556e+06	140705	140705	71828.1	0
Q60668	5	4	256.28	Heterogeneous nuclear ribonucleoprotein D0 OS=Mus musculus GN=Hnrnpd =1 SV=2	Hnrnpd	7.21072e+06	7.12805e+06	7.0083e+06	7.6258e+06	1.94053e+08	1.94053e+08	1.96344e+08	2.37496e+08
P25206	14	14	867.97	DNA replication licensing factor MCM3 OS=Mus musculus GN=Mcm3 =1 SV=2	Mcm3	7.16688e+06	7.00238e+06	8.12188e+06	7.49983e+06	2.14805e+07	2.14805e+07	2.70998e+07	2.81404e+07
Q8CDN6	4	4	217.07	Thioredoxin-like protein 1 OS=Mus musculus GN=Txnl1 PE=1 SV=3	Txnl1	7.1651e+06	7.4187e+06	7.20175e+06	7.85333e+06	0	0	0	0
P10852	1	1	71.94	4F2 cell-surface antigen heavy chain OS=Mus musculus GN=Slc3a2 PE=1 SV=1	Slc3a2	7.15671e+06	6.42119e+06	6.65478e+06	7.84372e+06	0	0	0	0
Q9DAW9	4	4	215.42	Calponin-3 OS=Mus musculus GN=Cnn3 =1 SV=1	Cnn3	7.14634e+06	6.93058e+06	6.57403e+06	8.51198e+06	1.43586e+06	1.43586e+06	1.67532e+06	971457
P46664	4	4	238.04	Adenylosuccinate synthetase isozyme 2 OS=Mus musculus GN=Adss PE=1 SV=2	Adss	7.05868e+06	6.06302e+06	6.68036e+06	6.80116e+06	0	0	0	0
P11983	8	8	406.29	T-complex protein 1 subunit alpha OS=Mus musculus GN=Tcp1 PE=1 SV=3	Tcp1	7.0285e+06	7.16506e+06	6.07546e+06	6.58495e+06	1.79671e+06	1.79671e+06	1.67006e+06	1.64013e+06
Q99KJ8	1	1	68.34	Dynactin subunit 2 OS=Mus musculus GN=Dctn2 PE=1 SV=3	Dctn2	7.01798e+06	6.87867e+06	7.96699e+06	7.71632e+06	230152	230152	298046	428548
P19783	3	3	144.91	Cytochrome c oxidase subunit 4 isoform 1, mitochondrial OS=Mus musculus GN=Cox4i1 =1 SV=2	Cox4i1	7.0031e+06	5.58508e+06	5.19334e+06	5.7958e+06	0	0	0	0
P97310	19	19	1171.81	DNA replication licensing factor MCM2 OS=Mus musculus GN=Mcm2 =1 SV=3	Mcm2	6.99173e+06	6.24747e+06	6.87802e+06	6.88934e+06	8.68644e+06	8.68644e+06	9.19045e+06	7.8895e+06
P63280	1	1	40.15	SUMO-conjugating enzyme UBC9 OS=Mus musculus GN=Ube2i =1 SV=1	Ube2i	6.97328e+06	1.0925e+07	1.00296e+07	1.03414e+07	3.09267e+06	3.09267e+06	3.65092e+06	3.84608e+06
Q9R0Q7	5	5	338.36	Prostaglandin E synthase 3 OS=Mus musculus GN=Ptges3 =1 SV=1	Ptges3	6.89044e+06	1.20938e+07	1.3708e+07	1.12931e+07	0	0	0	0
O55234	3	3	154.72	Proteasome subunit beta type-5 OS=Mus musculus GN=Psmb5 PE=1 SV=3	Psmb5	6.87739e+06	7.53553e+06	7.31736e+06	8.44287e+06	441473	441473	506579	571268
P40124	1	1	40.46	Adenylyl cyclase-associated protein 1 OS=Mus musculus GN=Cap1 PE=1 SV=4	Cap1	6.83211e+06	5.93343e+06	6.9745e+06	6.94154e+06	0	0	0	0
O54984	3	3	161.13	ATPase Asna1 OS=Mus musculus GN=Asna1 =1 SV=2	Asna1	6.80503e+06	6.30764e+06	7.24089e+06	6.94536e+06	0	0	0	0
P97351	1	1	44.79	40S ribosomal protein S3a OS=Mus musculus GN=Rps3a PE=1 SV=3	Rps3a	6.75589e+06	7.91925e+06	7.39743e+06	8.74305e+06	2.29476e+06	2.29476e+06	2.21352e+06	1.66612e+06
P68040	8	8	561.87	Receptor of activated protein C kinase 1 OS=Mus musculus GN=Rack1 =1 SV=3	Rack1	6.73955e+06	6.14857e+06	5.31165e+06	7.68541e+06	4.18185e+07	4.18185e+07	3.97895e+07	3.87682e+07
Q8VEM8	4	4	203.44	Phosphate carrier protein, mitochondrial OS=Mus musculus GN=Slc25a3 =1 SV=1	Slc25a3	6.73246e+06	7.44252e+06	6.65498e+06	6.76304e+06	0	0	0	0
P29341	12	12	634.46	Polyadenylate-binding protein 1 OS=Mus musculus GN=Pabpc1 =1 SV=2	Pabpc1	6.71842e+06	7.0966e+06	7.21205e+06	8.3624e+06	2.73766e+07	2.73766e+07	1.87003e+07	3.4685e+07
P47962	7	7	391.94	60S ribosomal protein L5 OS=Mus musculus GN=Rpl5 =1 SV=3	Rpl5	6.69203e+06	8.07736e+06	6.91285e+06	8.22517e+06	1.04596e+07	1.04596e+07	8.15119e+06	5.45849e+06
Q64105	5	5	379.43	Sepiapterin reductase OS=Mus musculus GN=Spr PE=1 SV=1	Spr	6.6914e+06	7.40076e+06	6.93117e+06	7.42566e+06	0	0	0	0
Q6PGH2	3	3	163.82	Hematological and neurological expressed 1-like protein OS=Mus musculus GN=Hn1l =1 SV=1	Hn1l	6.66977e+06	7.08639e+06	6.2693e+06	8.44797e+06	0	0	0	0
P24270	15	15	906.58	Catalase OS=Mus musculus GN=Cat =1 SV=4	Cat	6.63846e+06	5.84882e+06	5.8391e+06	5.65135e+06	1.13632e+06	1.13632e+06	542741	679782
Q60737	4	4	314.84	Casein kinase II subunit alpha OS=Mus musculus GN=Csnk2a1 =1 SV=2	Csnk2a1	6.58311e+06	6.39074e+06	7.35629e+06	7.89958e+06	5.4836e+06	5.4836e+06	9.64612e+06	1.02339e+07
O09044	2	2	108.35	Synaptosomal-associated protein 23 OS=Mus musculus GN=Snap23 =1 SV=1	Snap23	6.58224e+06	6.65534e+06	6.33943e+06	5.79189e+06	0	0	0	0
Q8VIJ6	9	9	449.77	Splicing factor, proline- and glutamine-rich OS=Mus musculus GN=Sfpq =1 SV=1	Sfpq	6.54967e+06	7.65045e+06	7.28021e+06	8.06802e+06	1.23748e+08	1.23748e+08	1.3177e+08	1.34091e+08
P70441	2	2	121.11	Na(+)/H(+) exchange regulatory cofactor NHE-RF1 OS=Mus musculus GN=Slc9a3r1 PE=1 SV=3	Slc9a3r1	6.48223e+06	6.0834e+06	5.42138e+06	6.36881e+06	109501	109501	76960.6	88496.3
P43275	4	4	336.68	Histone H1.1 OS=Mus musculus GN=Hist1h1a =1 SV=2	Hist1h1a	6.48096e+06	7.63746e+06	6.76016e+06	7.84434e+06	9.87432e+06	9.87432e+06	7.90435e+06	3.84376e+06
Q9WUK2	3	3	178.34	Eukaryotic translation initiation factor 4H OS=Mus musculus GN=Eif4h =1 SV=3	Eif4h	6.46229e+06	6.61684e+06	6.06853e+06	7.44556e+06	2.53113e+06	2.53113e+06	2.21498e+06	240422
O09005	1	1	79.31	Sphingolipid delta(4)-desaturase DES1 OS=Mus musculus GN=Degs1 =1 SV=1	Degs1	6.40529e+06	6.511e+06	9.17182e+06	6.43605e+06	0	0	0	0
Q6ZWM4	3	3	202.75	U6 snRNA-associated Sm-like protein LSm8 OS=Mus musculus GN=Lsm8 =1 SV=3	Lsm8	6.38431e+06	5.22401e+06	5.44153e+06	5.2099e+06	1.51656e+07	1.51656e+07	1.08082e+07	1.40501e+07
Q6GSS7	1	1	105.31	Histone H2A ty 2-A OS=Mus musculus GN=Hist2h2aa1 =1 SV=3	Hist2h2aa1	6.37552e+06	7.4352e+06	6.76174e+06	9.11687e+06	3.65105e+07	3.65105e+07	3.66518e+07	3.36133e+07
Q9D0E1	17	17	1070.91	Heterogeneous nuclear ribonucleoprotein M OS=Mus musculus GN=Hnrnpm =1 SV=3	Hnrnpm	6.37081e+06	6.98797e+06	6.95297e+06	7.78202e+06	1.16095e+08	1.16095e+08	9.34455e+07	1.05495e+08
Q62261	19	19	1255.69	Sctrin beta chain, non-erythrocytic 1 OS=Mus musculus GN=Sptbn1 =1 SV=2	Sptbn1	6.34766e+06	6.02149e+06	5.76677e+06	6.71006e+06	1.74842e+07	1.74842e+07	1.82802e+07	2.09499e+07
P09671	3	3	160.08	Suroxide dismutase [Mn], mitochondrial OS=Mus musculus GN=Sod2 =1 SV=3	Sod2	6.32348e+06	7.08761e+06	5.12658e+06	6.47912e+06	8.98806e+06	8.98806e+06	1.038e+07	1.13559e+07
Q8CF02	1	1	55.58	Protein FAM25C OS=Mus musculus GN=Fam25c PE=1 SV=1	Fam25c	6.28389e+06	5.81639e+06	5.14461e+06	5.46618e+06	0	0	0	0
P70333	4	4	247.22	Heterogeneous nuclear ribonucleoprotein H2 OS=Mus musculus GN=Hnrnph2 =1 SV=1	Hnrnph2	6.24105e+06	5.52238e+06	6.11773e+06	6.79981e+06	1.28943e+08	1.28943e+08	1.26719e+08	1.42879e+08
Q99NB8	3	3	162.45	Ubiquilin-4 OS=Mus musculus GN=Ubqln4 =1 SV=1	Ubqln4	6.23963e+06	6.76461e+06	5.79143e+06	6.8655e+06	0	0	0	0
Q9DBZ5	4	4	218.73	Eukaryotic translation initiation factor 3 subunit K OS=Mus musculus GN=Eif3k =1 SV=1	Eif3k	6.12123e+06	5.54244e+06	5.09846e+06	6.07771e+06	0	0	0	0
Q61792	2	2	107.71	LIM and SH3 domain protein 1 OS=Mus musculus GN=Lasp1 PE=1 SV=1	Lasp1	6.11781e+06	5.58047e+06	5.27445e+06	6.26558e+06	0	0	0	0
Q91WQ3	2	2	87.43	Tyrosine--tRNA ligase, cytoplasmic OS=Mus musculus GN=Yars PE=1 SV=3	Yars	6.10846e+06	5.30232e+06	6.18671e+06	6.82039e+06	2.08913e+06	2.08913e+06	2.02207e+06	2.15049e+06
O88685	4	4	255.23	26S protease regulatory subunit 6A OS=Mus musculus GN=Psmc3 PE=1 SV=2	Psmc3	6.06809e+06	6.59547e+06	7.08619e+06	6.07599e+06	0	0	0	0
Q9D0M3	3	3	168.34	Cytochrome c1, heme protein, mitochondrial OS=Mus musculus GN=Cyc1 =1 SV=1	Cyc1	6.0499e+06	6.89396e+06	5.83319e+06	6.4629e+06	0	0	0	0
Q3U0V1	12	12	774.39	Far upstream element-binding protein 2 OS=Mus musculus GN=Khsrp =1 SV=2	Khsrp	5.98853e+06	6.32173e+06	5.73104e+06	7.12848e+06	4.66917e+07	4.66917e+07	3.9494e+07	2.58828e+07
P12970	1	1	42.81	60S ribosomal protein L7a OS=Mus musculus GN=Rpl7a PE=1 SV=2	Rpl7a	5.96116e+06	6.64738e+06	5.40467e+06	7.15931e+06	0	0	0	0
Q9D1D4	7	7	460.07	Transmembrane emp24 domain-containing protein 10 OS=Mus musculus GN=Tmed10 =1 SV=1	Tmed10	5.96052e+06	5.04404e+06	4.78983e+06	4.53371e+06	0	0	0	0
P11157	1	1	64.42	Ribonucleoside-diphosphate reductase subunit M2 OS=Mus musculus GN=Rrm2 PE=1 SV=1	Rrm2	5.95857e+06	6.94995e+06	7.41982e+06	7.72402e+06	0	0	0	0
Q99020	6	5	324.03	Heterogeneous nuclear ribonucleoprotein A/B OS=Mus musculus GN=Hnrnpab =1 SV=1	Hnrnpab	5.95282e+06	5.59446e+06	5.67669e+06	6.15807e+06	2.31069e+08	2.31069e+08	2.59715e+08	2.6899e+08
P84099	3	3	149.4	60S ribosomal protein L19 OS=Mus musculus GN=Rpl19 PE=1 SV=1	Rpl19	5.95118e+06	5.11297e+06	4.96523e+06	5.93641e+06	145210	145210	718180	1.44216e+06
Q99JT9	4	4	161.37	1,2-dihydroxy-3-keto-5-methylthiontene dioxygenase OS=Mus musculus GN=Adi1 =1 SV=1	Adi1	5.90787e+06	4.92493e+06	3.84153e+06	5.75462e+06	0	0	0	0
Q9DB15	3	3	128.07	39S ribosomal protein L12, mitochondrial OS=Mus musculus GN=Mrpl12 =1 SV=2	Mrpl12	5.89326e+06	5.59812e+06	4.75538e+06	5.65432e+06	1.06494e+06	1.06494e+06	713944	770329
P20152	10	10	630.29	Vimentin OS=Mus musculus GN=Vim =1 SV=3	Vim	5.89033e+06	6.81583e+06	6.24461e+06	7.58757e+06	9.0162e+06	9.0162e+06	7.97046e+06	1.04131e+07
Q62465	5	5	388.67	Synaptic vesicle membrane protein VAT-1 homolog OS=Mus musculus GN=Vat1 =1 SV=3	Vat1	5.88725e+06	5.74437e+06	5.38759e+06	6.52539e+06	6.58708e+06	6.58708e+06	6.22946e+06	6.17513e+06
O89086	3	3	218.98	RNA-binding protein 3 OS=Mus musculus GN=Rbm3 =1 SV=1	Rbm3	5.88524e+06	6.36508e+06	6.36688e+06	7.57754e+06	9.83055e+07	9.83055e+07	9.98549e+07	1.13154e+08
O08784	11	11	575.02	Treacle protein OS=Mus musculus GN=Tcof1 =1 SV=1	Tcof1	5.85844e+06	5.69146e+06	5.55803e+06	5.86628e+06	9.4651e+06	9.4651e+06	1.12949e+07	1.55429e+07
Q8BGD9	1	1	44.14	Eukaryotic translation initiation factor 4B OS=Mus musculus GN=Eif4b PE=1 SV=1	Eif4b	5.8548e+06	5.46277e+06	4.90183e+06	6.13465e+06	1.28408e+06	1.28408e+06	1.14729e+06	1.44013e+06
Q61598	5	5	305.51	Rab GDP dissociation inhibitor beta OS=Mus musculus GN=Gdi2 PE=1 SV=1	Gdi2	5.84109e+06	5.48343e+06	4.58126e+06	6.08265e+06	366452	366452	455903	673316
P16125	3	3	187.06	L-lactate dehydrogenase B chain OS=Mus musculus GN=Ldhb PE=1 SV=2	Ldhb	5.83499e+06	6.12279e+06	4.92549e+06	5.99091e+06	0	0	0	0
P35979	4	4	178.43	60S ribosomal protein L12 OS=Mus musculus GN=Rpl12 =1 SV=2	Rpl12	5.8258e+06	7.01201e+06	5.80204e+06	7.14414e+06	1.51364e+07	1.51364e+07	1.19898e+07	1.3604e+07
Q60930	6	6	320.77	Voltage-dendent anion-selective channel protein 2 OS=Mus musculus GN=Vdac2 =1 SV=2	Vdac2	5.79327e+06	6.14851e+06	5.34312e+06	6.91463e+06	0	0	0	0
P58044	6	6	292.33	Isontenyl-diphosphate Delta-isomerase 1 OS=Mus musculus GN=Idi1 =1 SV=1	Idi1	5.779e+06	5.28148e+06	3.81014e+06	4.97793e+06	0	0	0	0
P62242	4	4	255.63	40S ribosomal protein S8 OS=Mus musculus GN=Rps8 PE=1 SV=2	Rps8	5.7372e+06	5.44911e+06	4.68762e+06	5.50109e+06	857501	857501	856637	970873
P11404	2	2	97.92	Fatty acid-binding protein, heart OS=Mus musculus GN=Fabp3 PE=1 SV=5	Fabp3	5.66523e+06	5.25872e+06	4.69665e+06	5.45852e+06	0	0	0	0
Q9CR57	2	2	109.72	60S ribosomal protein L14 OS=Mus musculus GN=Rpl14 PE=1 SV=3	Rpl14	5.65733e+06	5.42435e+06	4.92209e+06	5.41536e+06	0	0	0	0
O08756	5	5	243.57	3-hydroxyacyl-CoA dehydrogenase ty-2 OS=Mus musculus GN=Hsd17b10 =1 SV=4	Hsd17b10	5.64141e+06	5.74439e+06	4.53416e+06	4.79523e+06	5.59428e+06	5.59428e+06	5.51643e+06	3.87597e+06
Q9D1A2	1	1	69.85	Cytosolic non-specific dipeptidase OS=Mus musculus GN=Cndp2 PE=1 SV=1	Cndp2	5.6411e+06	5.49742e+06	4.91908e+06	5.74253e+06	0	0	0	0
Q8CAY6	3	3	184.82	Acetyl-CoA acetyltransferase, cytosolic OS=Mus musculus GN=Acat2 PE=1 SV=2	Acat2	5.60329e+06	5.29766e+06	4.29533e+06	5.49476e+06	0	0	0	0
P63166	4	4	186.05	Small ubiquitin-related modifier 1 OS=Mus musculus GN=Sumo1 =1 SV=1	Sumo1	5.59325e+06	6.59423e+06	6.30058e+06	9.04333e+06	7.79816e+06	7.79816e+06	9.4598e+06	5.44745e+06
P62204	1	1	41.99	Calmodulin OS=Mus musculus GN=Calm1 =1 SV=2	Calm1	5.57896e+06	5.42907e+06	4.54513e+06	6.87077e+06	0	0	0	0
Q62189	2	2	84.25	U1 small nuclear ribonucleoprotein A OS=Mus musculus GN=Snrpa =1 SV=3	Snrpa	5.5613e+06	5.17246e+06	5.39114e+06	6.61594e+06	6.68597e+07	6.68597e+07	6.51533e+07	6.69024e+07
Q7TNV0	5	5	302.83	Protein DEK OS=Mus musculus GN=Dek =1 SV=1	Dek	5.55294e+06	5.53756e+06	4.90771e+06	5.69577e+06	3.17935e+07	3.17935e+07	4.51121e+07	4.47435e+07
F6ZDS4	29	28	1774.32	Nucleoprotein TPR OS=Mus musculus GN=Tpr =1 SV=1	Tpr	5.50309e+06	6.13756e+06	5.32386e+06	6.51611e+06	9.48254e+06	9.48254e+06	9.60331e+06	9.64643e+06
Q9CPV4	4	4	239.8	Glyoxalase domain-containing protein 4 OS=Mus musculus GN=Glod4 PE=1 SV=1	Glod4	5.50246e+06	5.80512e+06	6.01052e+06	5.69504e+06	0	0	0	0
P55302	1	1	36.96	Alpha-2-macroglobulin receptor-associated protein OS=Mus musculus GN=Lrpap1 PE=1 SV=1	Lrpap1	5.48234e+06	4.91091e+06	5.42965e+06	5.43036e+06	910779	910779	889400	808490
Q9CYR0	1	1	47.49	Single-stranded DNA-binding protein, mitochondrial OS=Mus musculus GN=Ssbp1 PE=1 SV=1	Ssbp1	5.47586e+06	4.41642e+06	3.89357e+06	5.36547e+06	3.08579e+06	3.08579e+06	4.03167e+06	4.0893e+06
P80318	9	9	512.98	T-complex protein 1 subunit gamma OS=Mus musculus GN=Cct3 PE=1 SV=1	Cct3	5.46174e+06	5.23185e+06	6.05877e+06	6.27468e+06	1.1446e+06	1.1446e+06	2.53674e+06	3.17345e+06
P61358	4	4	311.86	60S ribosomal protein L27 OS=Mus musculus GN=Rpl27 PE=1 SV=2	Rpl27	5.45946e+06	5.88659e+06	4.97782e+06	5.88958e+06	5.23672e+06	5.23672e+06	5.35496e+06	5.05648e+06
P62754	2	2	108.46	40S ribosomal protein S6 OS=Mus musculus GN=Rps6 PE=1 SV=1	Rps6	5.45317e+06	5.48147e+06	5.77851e+06	6.18508e+06	689795	689795	837011	129863
P11438	3	3	162.78	Lysosome-associated membrane glycoprotein 1 OS=Mus musculus GN=Lamp1 =1 SV=2	Lamp1	5.42218e+06	5.97864e+06	4.23168e+06	6.27475e+06	0	0	0	0
P26231	9	9	521.8	Catenin alpha-1 OS=Mus musculus GN=Ctnna1 =1 SV=1	Ctnna1	5.40672e+06	5.0421e+06	5.56143e+06	5.56699e+06	1.23313e+06	1.23313e+06	1.49775e+06	1.63321e+06
Q9CZ30	1	1	53.87	Obg-like ATPase 1 OS=Mus musculus GN=Ola1 PE=1 SV=1	Ola1	5.40608e+06	4.70859e+06	5.05671e+06	4.74564e+06	1.63388e+06	1.63388e+06	1.9163e+06	2.02987e+06
P47964	3	3	171.52	60S ribosomal protein L36 OS=Mus musculus GN=Rpl36 PE=3 SV=2	Rpl36	5.38812e+06	7.56005e+06	8.05328e+06	8.18261e+06	0	0	0	0
P59235	1	1	44.47	Nucleoporin Nup43 OS=Mus musculus GN=Nup43 PE=1 SV=2	Nup43	5.38336e+06	5.02499e+06	5.61636e+06	5.77157e+06	1.19507e+06	1.19507e+06	1.55039e+06	1.73037e+06
P23492	2	2	99.56	Purine nucleoside phosphorylase OS=Mus musculus GN=Pnp PE=1 SV=2	Pnp	5.37388e+06	5.35142e+06	5.58823e+06	5.16356e+06	0	0	0	0
Q9CYZ2	1	1	69.96	Tumor protein D54 OS=Mus musculus GN=Tpd52l2 PE=1 SV=1	Tpd52l2	5.37213e+06	5.69358e+06	6.40635e+06	6.99714e+06	0	0	0	0
O88958	2	2	106.14	Glucosamine-6-phosphate isomerase 1 OS=Mus musculus GN=Gnpda1 PE=1 SV=3	Gnpda1	5.32027e+06	5.41912e+06	5.12084e+06	5.9223e+06	0	0	0	0
P62311	2	2	87.19	U6 snRNA-associated Sm-like protein LSm3 OS=Mus musculus GN=Lsm3 =1 SV=2	Lsm3	5.25933e+06	6.18643e+06	5.35258e+06	6.135e+06	6.41162e+06	6.41162e+06	6.73916e+06	6.17823e+06
P50518	2	2	136.38	V-ty proton ATPase subunit E 1 OS=Mus musculus GN=Atp6v1e1 =1 SV=2	Atp6v1e1	5.23064e+06	4.48548e+06	4.97156e+06	5.01872e+06	0	0	0	0
Q3TLP5	3	3	229.62	Enoyl-CoA hydratase domain-containing protein 2, mitochondrial OS=Mus musculus GN=Echdc2 =1 SV=2	Echdc2	5.22321e+06	5.21971e+06	5.43371e+06	5.70769e+06	3.9981e+06	3.9981e+06	3.4643e+06	3.26245e+06
Q99LT0	2	2	141.7	Protein dpy-30 homolog OS=Mus musculus GN=Dpy30 PE=1 SV=1	Dpy30	5.21387e+06	5.89116e+06	6.91387e+06	6.99434e+06	2.58799e+06	2.58799e+06	1.63658e+06	1.55883e+06
P08113	10	10	534.44	Endoplasmin OS=Mus musculus GN=Hsp90b1 =1 SV=2	Hsp90b1	5.19512e+06	6.1725e+06	6.16444e+06	5.8688e+06	1.10997e+07	1.10997e+07	1.17994e+07	1.12824e+07
O35658	1	1	46.16	Complement component 1 Q subcomponent-binding protein, mitochondrial OS=Mus musculus GN=C1qbp PE=1 SV=1	C1qbp	5.17423e+06	5.17786e+06	3.96119e+06	5.19628e+06	981031	981031	310404	240826
P62918	1	1	44.79	60S ribosomal protein L8 OS=Mus musculus GN=Rpl8 PE=1 SV=2	Rpl8	5.16617e+06	5.82591e+06	5.03365e+06	5.33075e+06	0	0	0	0
Q9D8B3	5	5	299.73	Charged multivesicular body protein 4b OS=Mus musculus GN=Chmp4b =1 SV=2	Chmp4b	5.12058e+06	4.22966e+06	4.41975e+06	5.9545e+06	0	0	0	0
Q99L13	1	1	46.46	3-hydroxyisobutyrate dehydrogenase, mitochondrial OS=Mus musculus GN=Hibadh PE=1 SV=1	Hibadh	5.07097e+06	5.23028e+06	6.0442e+06	5.40571e+06	496235	496235	807382	956062
Q3UKJ7	7	7	421.72	WD40 reat-containing protein SMU1 OS=Mus musculus GN=Smu1 =2 SV=2	Smu1	5.05192e+06	5.28914e+06	5.39537e+06	5.92097e+06	9.67018e+06	9.67018e+06	1.05458e+07	1.0184e+07
Q9DCW4	3	3	182.34	Electron transfer flavoprotein subunit beta OS=Mus musculus GN=Etfb =1 SV=3	Etfb	5.04218e+06	4.55044e+06	4.41667e+06	4.97853e+06	6.72799e+06	6.72799e+06	7.16264e+06	7.32136e+06
P70460	5	5	304.47	Vasodilator-stimulated phosphoprotein OS=Mus musculus GN=Vasp =1 SV=4	Vasp	5.03182e+06	5.18273e+06	5.55945e+06	5.23874e+06	179111	179111	317362	155099
Q9DCJ5	1	1	39.56	NADH dehydrogenase [ubiquinone] 1 alpha subcomplex subunit 8 OS=Mus musculus GN=Ndufa8 PE=1 SV=3	Ndufa8	5.02517e+06	4.95841e+06	5.17871e+06	5.12334e+06	0	0	0	0
P11031	5	5	306.47	Activated RNA polymerase II transcriptional coactivator p15 OS=Mus musculus GN=Sub1 =1 SV=3	Sub1	5.02308e+06	5.49037e+06	4.52894e+06	4.73296e+06	7.03129e+06	7.03129e+06	6.907e+06	8.3526e+06
P67778	6	6	423.2	Prohibitin OS=Mus musculus GN=Phb =1 SV=1	Phb	5.02036e+06	4.78708e+06	5.01949e+06	5.12892e+06	0	0	0	0
O35887	3	3	258.16	Calumenin OS=Mus musculus GN=Calu =1 SV=1	Calu	5.01659e+06	5.05074e+06	4.27206e+06	5.23945e+06	1.97264e+06	1.97264e+06	1.92765e+06	1.64632e+06
P62897	7	7	429.45	Cytochrome c, somatic OS=Mus musculus GN=Cycs =1 SV=2	Cycs	4.99856e+06	4.78452e+06	3.47752e+06	4.43566e+06	2.22634e+07	2.22634e+07	1.63582e+07	2.09895e+07
P24668	2	2	210.36	Cation-dendent mannose-6-phosphate receptor OS=Mus musculus GN=M6pr =1 SV=1	M6pr	4.97192e+06	5.8924e+06	5.25881e+06	7.01903e+06	0	0	0	0
Q9CQM5	5	5	266.66	Thioredoxin domain-containing protein 17 OS=Mus musculus GN=Txndc17 =1 SV=1	Txndc17	4.96619e+06	3.44349e+06	3.73488e+06	4.27002e+06	0	0	0	0
Q99J77	2	2	110.38	Sialic acid synthase OS=Mus musculus GN=Nans =1 SV=1	Nans	4.96176e+06	4.2398e+06	3.83176e+06	4.6279e+06	0	0	0	0
O08795	5	5	384.63	Glucosidase 2 subunit beta OS=Mus musculus GN=Prkcsh PE=1 SV=1	Prkcsh	4.95623e+06	8.2575e+06	6.21698e+06	7.90453e+06	1.36572e+06	1.36572e+06	1.44359e+06	1.25952e+06
P56395	4	3	213.03	Cytochrome b5 OS=Mus musculus GN=Cyb5a =1 SV=2	Cyb5a	4.95536e+06	5.92783e+06	5.50198e+06	6.1168e+06	0	0	0	0
Q78ZA7	4	4	196.1	Nucleosome assembly protein 1-like 4 OS=Mus musculus GN=Nap1l4 =1 SV=1	Nap1l4	4.92893e+06	4.55605e+06	4.93885e+06	5.83306e+06	0	0	0	0
P62317	1	1	67.76	Small nuclear ribonucleoprotein Sm D2 OS=Mus musculus GN=Snrpd2 =1 SV=1	Snrpd2	4.92637e+06	4.36191e+06	3.66764e+06	5.33752e+06	1.09829e+07	1.09829e+07	2.61e+07	2.70391e+07
P62843	1	1	46.02	40S ribosomal protein S15 OS=Mus musculus GN=Rps15 PE=1 SV=2	Rps15	4.91068e+06	4.58213e+06	4.56481e+06	4.71089e+06	4.25672e+06	4.25672e+06	4.36004e+06	412554
P19253	1	1	48.07	60S ribosomal protein L13a OS=Mus musculus GN=Rpl13a PE=1 SV=4	Rpl13a	4.90365e+06	4.75855e+06	5.89355e+06	6.17956e+06	0	0	0	0
Q99LD8	1	1	48.49	N(G),N(G)-dimethylarginine dimethylaminohydrolase 2 OS=Mus musculus GN=Ddah2 PE=1 SV=1	Ddah2	4.89988e+06	5.14317e+06	5.91358e+06	5.4569e+06	0	0	0	0
Q6P8I4	5	5	349.48	ST proteolytic signal-containing nuclear protein OS=Mus musculus GN=Pcnp =1 SV=1	Pcnp	4.85936e+06	4.90419e+06	4.3614e+06	4.8434e+06	5.95453e+06	5.95453e+06	5.01024e+06	4.93883e+06
Q99LC5	5	5	351.11	Electron transfer flavoprotein subunit alpha, mitochondrial OS=Mus musculus GN=Etfa =1 SV=2	Etfa	4.85191e+06	4.98802e+06	5.27503e+06	5.56241e+06	6.74673e+06	6.74673e+06	6.56235e+06	5.18632e+06
Q99LP6	2	2	87.73	GrpE protein homolog 1, mitochondrial OS=Mus musculus GN=Grpel1 PE=1 SV=1	Grpel1	4.83371e+06	4.36641e+06	5.31999e+06	4.63713e+06	2.41575e+06	2.41575e+06	2.18722e+06	2.39558e+06
P51410	1	1	41.86	60S ribosomal protein L9 OS=Mus musculus GN=Rpl9 PE=2 SV=2	Rpl9	4.82752e+06	4.43262e+06	4.21312e+06	4.64635e+06	2.33627e+06	2.33627e+06	1.89786e+06	1.95245e+06
P28667	2	2	161.14	MARCKS-related protein OS=Mus musculus GN=Marcksl1 =1 SV=2	Marcksl1	4.82205e+06	5.55621e+06	5.17252e+06	5.97803e+06	239132	239132	440695	532531
Q9D8E6	2	2	102.49	60S ribosomal protein L4 OS=Mus musculus GN=Rpl4 PE=1 SV=3	Rpl4	4.821e+06	6.57219e+06	5.62856e+06	6.78343e+06	0	0	0	0
Q9JII5	1	1	99.68	DAZ-associated protein 1 OS=Mus musculus GN=Dazap1 =1 SV=2	Dazap1	4.80589e+06	4.57286e+06	4.91502e+06	4.24293e+06	3.36964e+07	3.36964e+07	2.86358e+07	2.73324e+07
Q62426	2	2	90.93	Cystatin-B OS=Mus musculus GN=Cstb PE=1 SV=1	Cstb	4.7659e+06	5.00635e+06	5.44127e+06	5.53307e+06	0	0	0	0
Q3UEB3	6	6	343.46	Poly(U)-binding-splicing factor PUF60 OS=Mus musculus GN=Puf60 =1 SV=2	Puf60	4.75291e+06	4.87497e+06	4.1941e+06	5.29109e+06	4.70887e+07	4.70887e+07	5.49105e+07	5.88274e+07
Q9R1P1	1	1	67.15	Proteasome subunit beta type-3 OS=Mus musculus GN=Psmb3 PE=1 SV=1	Psmb3	4.74537e+06	5.06751e+06	5.22574e+06	5.41225e+06	0	0	59046.9	0
O55022	4	4	192.25	Membrane-associated progesterone receptor component 1 OS=Mus musculus GN=Pgrmc1 =1 SV=4	Pgrmc1	4.74204e+06	4.66437e+06	4.90405e+06	5.09585e+06	0	0	0	0
Q9D358	1	1	65.95	Low molecular weight phosphotyrosine protein phosphatase OS=Mus musculus GN=Acp1 PE=1 SV=3	Acp1	4.73689e+06	6.45666e+06	4.63847e+06	6.06286e+06	0	0	0	0
Q9R1T2	3	3	149.69	SUMO-activating enzyme subunit 1 OS=Mus musculus GN=Sae1 PE=1 SV=1	Sae1	4.73449e+06	4.47384e+06	3.33698e+06	3.53287e+06	0	0	0	0
Q99NB9	9	9	494.97	Splicing factor 3B subunit 1 OS=Mus musculus GN=Sf3b1 =1 SV=1	Sf3b1	4.71697e+06	4.13353e+06	3.26475e+06	3.84349e+06	2.16666e+07	2.16666e+07	2.24135e+07	2.5074e+07
P61255	1	1	47.04	60S ribosomal protein L26 OS=Mus musculus GN=Rpl26 PE=1 SV=1	Rpl26	4.63228e+06	3.63699e+06	3.47969e+06	4.0741e+06	1.94012e+06	1.94012e+06	1.92479e+06	1.91511e+06
Q9CYG7	3	3	224.25	Mitochondrial import receptor subunit TOM34 OS=Mus musculus GN=Tomm34 PE=1 SV=1	Tomm34	4.60491e+06	4.34078e+06	4.58744e+06	4.4161e+06	156980	156980	308492	378188
Q8R016	2	2	123.01	Bleomycin hydrolase OS=Mus musculus GN=Blmh =1 SV=1	Blmh	4.60423e+06	4.67363e+06	5.23477e+06	5.3204e+06	0	0	0	0
Q921M3	11	11	765.11	Splicing factor 3B subunit 3 OS=Mus musculus GN=Sf3b3 =1 SV=1	Sf3b3	4.53998e+06	4.5784e+06	3.78357e+06	4.28097e+06	2.71874e+07	2.71874e+07	2.75198e+07	2.61652e+07
P57759	3	3	153.41	Endoplasmic reticulum resident protein 29 OS=Mus musculus GN=Erp29 =1 SV=2	Erp29	4.52795e+06	4.55839e+06	4.51629e+06	4.77882e+06	1.04558e+06	1.04558e+06	1.16392e+06	1.54339e+06
P08030	4	4	303.64	Adenine phosphoribosyltransferase OS=Mus musculus GN=Aprt =1 SV=2	Aprt	4.50816e+06	5.2142e+06	4.52773e+06	5.74858e+06	0	0	0	0
Q99KR3	1	1	55.52	Endoribonuclease LACTB2 OS=Mus musculus GN=Lactb2 PE=1 SV=1	Lactb2	4.50642e+06	4.46286e+06	3.96756e+06	5.13575e+06	0	0	0	0
Q920E5	3	3	153.78	Farnesyl pyrophosphate synthase OS=Mus musculus GN=Fdps PE=1 SV=1	Fdps	4.49951e+06	4.31956e+06	3.41319e+06	4.50929e+06	0	0	0	0
P30999	8	8	316.85	Catenin delta-1 OS=Mus musculus GN=Ctnnd1 =1 SV=2	Ctnnd1	4.46178e+06	4.70345e+06	4.20397e+06	3.44884e+06	6.77515e+06	6.77515e+06	6.65568e+06	6.94734e+06
Q9Z1R2	2	2	111.32	Large proline-rich protein BAG6 OS=Mus musculus GN=Bag6 PE=1 SV=1	Bag6	4.44438e+06	4.4307e+06	4.74172e+06	4.67395e+06	0	0	0	0
Q99KI0	7	7	387.65	Aconitate hydratase, mitochondrial OS=Mus musculus GN=Aco2 =1 SV=1	Aco2	4.37501e+06	5.21091e+06	4.47889e+06	4.74003e+06	7.64836e+06	7.64836e+06	6.21567e+06	6.35218e+06
Q9Z2X1	5	5	287.45	Heterogeneous nuclear ribonucleoprotein F OS=Mus musculus GN=Hnrnpf =1 SV=3	Hnrnpf	4.3706e+06	3.63437e+06	1.84402e+06	2.24913e+06	1.64087e+08	1.64087e+08	1.70157e+08	1.85132e+08
Q9DCL9	5	5	256.84	Multifunctional protein ADE2 OS=Mus musculus GN=Paics PE=1 SV=4	Paics	4.34952e+06	4.66173e+06	4.34166e+06	5.45596e+06	0	0	0	0
P62862	1	1	45.39	40S ribosomal protein S30 OS=Mus musculus GN=Fau PE=1 SV=1	Fau	4.33116e+06	4.03019e+06	3.90602e+06	4.31247e+06	670750	670750	627095	703657
Q99LB6	2	2	157.34	Methionine adenosyltransferase 2 subunit beta OS=Mus musculus GN=Mat2b PE=1 SV=1	Mat2b	4.32703e+06	4.95988e+06	4.68324e+06	5.24336e+06	0	0	0	0
P09242	1	1	43.19	Alkaline phosphatase, tissue-nonspecific isozyme OS=Mus musculus GN=Alpl PE=1 SV=2	Alpl	4.32286e+06	4.51308e+06	4.26946e+06	4.41671e+06	0	0	91313	37531.6
Q7TPV4	15	15	919.56	Myb-binding protein 1A OS=Mus musculus GN=Mybbp1a =1 SV=2	Mybbp1a	4.31678e+06	4.2378e+06	4.62393e+06	4.72008e+06	1.5927e+07	1.5927e+07	1.47788e+07	8.26683e+06
Q9JJI8	1	1	115.76	60S ribosomal protein L38 OS=Mus musculus GN=Rpl38 =1 SV=3	Rpl38	4.31145e+06	3.25738e+06	4.46678e+06	4.15791e+06	5.95288e+06	5.95288e+06	4.6267e+06	4.45457e+06
P51881	4	4	217.8	ADP/ATP translocase 2 OS=Mus musculus GN=Slc25a5 =1 SV=3	Slc25a5	4.29106e+06	4.58847e+06	4.29796e+06	5.42134e+06	0	0	0	0
Q9D1C1	1	1	45	Ubiquitin-conjugating enzyme E2 C OS=Mus musculus GN=Ube2c =1 SV=1	Ube2c	4.27933e+06	4.44987e+06	5.21259e+06	5.43457e+06	0	0	0	0
Q9WUM4	1	1	68.34	Coronin-1C OS=Mus musculus GN=Coro1c =1 SV=2	Coro1c	4.27746e+06	3.94055e+06	4.45585e+06	3.42557e+06	1.248e+07	1.248e+07	1.32086e+07	1.45892e+07
O35226	1	1	44.79	26S proteasome non-ATPase regulatory subunit 4 OS=Mus musculus GN=Psmd4 PE=1 SV=1	Psmd4	4.27035e+06	5.36948e+06	5.10046e+06	4.91754e+06	0	0	0	0
Q6PGB6	1	1	40.67	N-alpha-acetyltransferase 50 OS=Mus musculus GN=Naa50 =1 SV=1	Naa50	4.24431e+06	4.1892e+06	3.16014e+06	3.42779e+06	211018	211018	423890	335267
P57722	1	1	49.7	Poly(rC)-binding protein 3 OS=Mus musculus GN=Pcbp3 PE=1 SV=3	Pcbp3	4.23914e+06	5.33214e+06	4.38324e+06	5.6146e+06	130380	130380	155714	0
P14824	3	3	170.03	Annexin A6 OS=Mus musculus GN=Anxa6 PE=1 SV=3	Anxa6	4.23041e+06	3.8388e+06	4.54622e+06	4.7e+06	0	0	0	0
Q99JF8	2	2	186.47	PC4 and SFRS1-interacting protein OS=Mus musculus GN=Psip1 =1 SV=1	Psip1	4.22969e+06	4.08736e+06	4.19039e+06	3.66232e+06	9.33507e+07	9.33507e+07	1.07786e+08	1.34431e+08
Q9CQC6	5	5	330.69	Basic leucine zipr and W2 domain-containing protein 1 OS=Mus musculus GN=Bzw1 =1 SV=1	Bzw1	4.22101e+06	4.81013e+06	4.07328e+06	4.58676e+06	2.73808e+06	2.73808e+06	2.16868e+06	2.07919e+06
P21107	6	6	336.3	Tropomyosin alpha-3 chain OS=Mus musculus GN=Tpm3 PE=1 SV=3	Tpm3	4.18997e+06	5.37244e+06	5.84696e+06	4.88774e+06	4.61714e+06	4.61714e+06	4.45024e+06	2.35583e+06
Q9DCT6	3	3	160.45	Chromatin complexes subunit BAP18 OS=Mus musculus GN=Bap18 =1 SV=1	Bap18	4.16338e+06	4.33835e+06	4.08127e+06	4.75483e+06	5.54807e+06	5.54807e+06	5.17643e+06	5.05721e+06
P25444	3	3	137.78	40S ribosomal protein S2 OS=Mus musculus GN=Rps2 PE=1 SV=3	Rps2	4.15785e+06	3.44297e+06	3.19411e+06	3.55899e+06	3.37388e+06	3.37388e+06	2.90805e+06	2.95959e+06
O09106	3	3	144.34	Histone deacetylase 1 OS=Mus musculus GN=Hdac1 =1 SV=1	Hdac1	4.13645e+06	3.94686e+06	3.42515e+06	3.8356e+06	3.24786e+07	3.24786e+07	3.22178e+07	2.45024e+07
P14131	1	1	36.49	40S ribosomal protein S16 OS=Mus musculus GN=Rps16 PE=1 SV=4	Rps16	4.12728e+06	5.25266e+06	4.12723e+06	4.89984e+06	1.13594e+06	1.13594e+06	882026	2.24164e+06
Q9Z2Y8	2	2	116.28	Proline synthase co-transcribed bacterial homolog protein OS=Mus musculus GN=Prosc =1 SV=1	Prosc	4.12677e+06	3.95877e+06	4.30474e+06	3.90353e+06	62993.3	62993.3	105502	42835.3
P70168	6	6	264.18	Importin subunit beta-1 OS=Mus musculus GN=Kpnb1 =1 SV=2	Kpnb1	4.12206e+06	3.6149e+06	3.50967e+06	3.80428e+06	5.26141e+06	5.26141e+06	8.07165e+06	4.03165e+06
P61514	3	3	166.81	60S ribosomal protein L37a OS=Mus musculus GN=Rpl37a PE=1 SV=2	Rpl37a	4.12126e+06	3.49382e+06	4.16977e+06	4.49624e+06	0	0	0	0
Q8QZY1	6	6	362.03	Eukaryotic translation initiation factor 3 subunit L OS=Mus musculus GN=Eif3l =1 SV=1	Eif3l	4.11936e+06	4.07927e+06	3.77874e+06	3.26246e+06	598219	598219	572721	492019
P62869	2	2	95.97	Transcription elongation factor B polypeptide 2 OS=Mus musculus GN=Tceb2 PE=1 SV=1	Tceb2	4.10397e+06	4.63492e+06	3.65876e+06	3.7161e+06	1.84908e+06	1.84908e+06	1.37911e+06	1.65313e+06
Q3UHX2	2	2	167.23	28 kDa heat- and acid-stable phosphoprotein OS=Mus musculus GN=Pdap1 PE=1 SV=1	Pdap1	4.09664e+06	5.56461e+06	3.67045e+06	4.73995e+06	822194	822194	676060	612864
Q9D287	1	1	37.98	Pre-mRNA-splicing factor SPF27 OS=Mus musculus GN=Bcas2 =1 SV=1	Bcas2	4.08336e+06	3.65044e+06	3.29217e+06	4.6963e+06	9.09978e+06	9.09978e+06	7.90441e+06	9.16106e+06
P50516	5	5	264.35	V-type proton ATPase catalytic subunit A OS=Mus musculus GN=Atp6v1a PE=1 SV=2	Atp6v1a	4.07541e+06	4.63165e+06	3.68146e+06	4.42049e+06	0	0	0	0
P63073	3	3	205.18	Eukaryotic translation initiation factor 4E OS=Mus musculus GN=Eif4e =1 SV=1	Eif4e	4.06002e+06	4.10288e+06	3.76248e+06	3.58412e+06	809598	809598	1.01418e+06	917855
Q64010	3	3	138.75	Adapter molecule crk OS=Mus musculus GN=Crk PE=1 SV=1	Crk	4.04966e+06	3.90007e+06	3.00063e+06	3.4462e+06	0	0	0	0
P80313	4	4	195.86	T-complex protein 1 subunit eta OS=Mus musculus GN=Cct7 PE=1 SV=1	Cct7	4.0472e+06	4.01073e+06	5.12185e+06	5.55688e+06	695005	695005	496402	508388
Q9CPR4	5	5	321.66	60S ribosomal protein L17 OS=Mus musculus GN=Rpl17 PE=1 SV=3	Rpl17	4.04619e+06	3.27986e+06	2.50578e+06	3.73391e+06	23143.6	23143.6	55501.8	433222
Q60598	2	2	84.78	Src substrate cortactin OS=Mus musculus GN=Cttn =1 SV=2	Cttn	4.04259e+06	3.62365e+06	3.54199e+06	4.40442e+06	255106	255106	568181	635282
Q8K4Z5	8	8	449.5	Splicing factor 3A subunit 1 OS=Mus musculus GN=Sf3a1 =1 SV=1	Sf3a1	4.01987e+06	3.81043e+06	3.9886e+06	4.16329e+06	1.48897e+07	1.48897e+07	1.51452e+07	1.77979e+07
Q9QZQ8	4	4	233.22	Core histone macro-H2A.1 OS=Mus musculus GN=H2afy =1 SV=3	H2afy	4.0175e+06	3.77598e+06	3.66435e+06	4.18297e+06	5.07214e+07	5.07214e+07	4.50875e+07	2.29101e+07
Q05186	3	3	187.26	Reticulocalbin-1 OS=Mus musculus GN=Rcn1 =1 SV=1	Rcn1	3.98733e+06	4.56261e+06	3.58133e+06	4.01535e+06	347409	347409	397395	322098
Q61189	1	1	101	Methylosome subunit pICln OS=Mus musculus GN=Clns1a PE=1 SV=1	Clns1a	3.95566e+06	3.53936e+06	4.1314e+06	4.30071e+06	0	0	0	0
Q9DCT8	1	1	58.11	Cysteine-rich protein 2 OS=Mus musculus GN=Crip2 =1 SV=1	Crip2	3.94461e+06	3.59093e+06	3.2714e+06	4.56716e+06	0	0	0	0
P62814	3	3	139.64	V-type proton ATPase subunit B, brain isoform OS=Mus musculus GN=Atp6v1b2 PE=1 SV=1	Atp6v1b2	3.93779e+06	2.69591e+06	4.19074e+06	2.93001e+06	0	0	0	0
P56135	1	1	52.61	ATP synthase subunit f, mitochondrial OS=Mus musculus GN=Atp5j2 =1 SV=3	Atp5j2	3.90129e+06	4.61683e+06	4.0182e+06	4.43515e+06	0	0	0	0
Q9QUR6	4	4	207.69	Prolyl endopeptidase OS=Mus musculus GN=Prep PE=1 SV=1	Prep	3.88794e+06	3.80729e+06	3.98962e+06	3.99843e+06	0	0	0	0
Q91YR9	4	4	169.19	Prostaglandin reductase 1 OS=Mus musculus GN=Ptgr1 =1 SV=2	Ptgr1	3.87666e+06	3.90117e+06	3.73042e+06	3.46153e+06	0	0	0	0
Q64727	1	1	50.52	Vinculin OS=Mus musculus GN=Vcl PE=1 SV=4	Vcl	3.86657e+06	3.72611e+06	4.28171e+06	3.47549e+06	575129	575129	450503	412696
Q9WVA2	2	2	187.32	Mitochondrial import inner membrane translocase subunit Tim8 A OS=Mus musculus GN=Timm8a1 =1 SV=1	Timm8a1	3.84576e+06	3.50938e+06	3.57304e+06	4.11202e+06	8.3677e+06	8.3677e+06	9.02244e+06	1.05535e+07
Q9CQU0	2	2	113.81	Thioredoxin domain-containing protein 12 OS=Mus musculus GN=Txndc12 PE=1 SV=1	Txndc12	3.8441e+06	3.70978e+06	3.80584e+06	4.19144e+06	308498	308498	402010	418468
P62774	1	1	46.56	Myotrophin OS=Mus musculus GN=Mtpn =1 SV=2	Mtpn	3.81016e+06	4.54087e+06	3.58054e+06	4.09523e+06	0	0	0	0
Q8BGQ7	10	10	533.61	Alanine--tRNA ligase, cytoplasmic OS=Mus musculus GN=Aars PE=1 SV=1	Aars	3.80955e+06	3.42762e+06	3.28443e+06	3.79847e+06	0	0	0	0
Q9CQ48	4	4	257.87	NudC domain-containing protein 2 OS=Mus musculus GN=Nudcd2 =1 SV=1	Nudcd2	3.80671e+06	3.8002e+06	3.69496e+06	4.13298e+06	0	0	0	0
Q64674	3	3	173.52	Spermidine synthase OS=Mus musculus GN=Srm PE=1 SV=1	Srm	3.79405e+06	3.71675e+06	3.25723e+06	3.67663e+06	0	0	0	0
Q91VJ1	1	1	59.68	Interferon-inducible protein AIM2 OS=Mus musculus GN=Aim2 =1 SV=2	Aim2	3.79081e+06	3.53552e+06	3.0111e+06	4.34149e+06	2.52524e+06	2.52524e+06	2.08085e+06	2.37502e+06
Q8BGS2	2	2	96.3	BolA-like protein 2 OS=Mus musculus GN=Bola2 PE=1 SV=1	Bola2	3.78783e+06	3.52963e+06	2.99983e+06	3.56317e+06	0	0	0	0
Q8BH95	5	5	301.55	Enoyl-CoA hydratase, mitochondrial OS=Mus musculus GN=Echs1 =1 SV=1	Echs1	3.74586e+06	3.31674e+06	3.56891e+06	3.7601e+06	6.01335e+06	6.01335e+06	5.29807e+06	5.92055e+06
Q9CWM4	5	5	228.66	Prefoldin subunit 1 OS=Mus musculus GN=Pfdn1 =1 SV=1	Pfdn1	3.7386e+06	3.25333e+06	4.10107e+06	3.75005e+06	0	0	0	0
Q9D855	3	3	160.31	Cytochrome b-c1 complex subunit 7 OS=Mus musculus GN=Uqcrb =1 SV=3	Uqcrb	3.7363e+06	3.61592e+06	3.50752e+06	4.17925e+06	0	0	0	0
Q9CQ60	4	4	228.37	6-phosphogluconolactonase OS=Mus musculus GN=Pgls PE=1 SV=1	Pgls	3.71188e+06	3.19647e+06	3.19548e+06	2.91636e+06	0	0	0	0
P63330	5	5	232.81	Serine/threonine-protein phosphatase 2A catalytic subunit alpha isoform OS=Mus musculus GN=Ppp2ca =1 SV=1	Ppp2ca	3.70297e+06	3.45515e+06	3.64553e+06	3.91957e+06	0	0	0	0
Q8BTI8	12	12	796.78	Serine/arginine retitive matrix protein 2 OS=Mus musculus GN=Srrm2 =1 SV=3	Srrm2	3.6993e+06	4.06408e+06	3.74448e+06	4.68014e+06	4.48529e+06	4.48529e+06	4.40569e+06	3.71527e+06
P97315	1	1	44.92	Cysteine and glycine-rich protein 1 OS=Mus musculus GN=Csrp1 =1 SV=3	Csrp1	3.68808e+06	4.11729e+06	3.2242e+06	3.55311e+06	0	0	0	0
P23708	1	1	79.36	Nuclear transcription factor Y subunit alpha OS=Mus musculus GN=Nfya =1 SV=2	Nfya	3.67542e+06	3.74808e+06	2.98803e+06	4.38012e+06	1.55858e+07	1.55858e+07	1.3714e+07	2.06956e+07
Q8K354	3	3	235.9	Carbonyl reductase [NADPH] 3 OS=Mus musculus GN=Cbr3 PE=1 SV=1	Cbr3	3.6648e+06	3.60222e+06	3.8373e+06	3.76737e+06	0	0	0	0
Q9CQI7	2	2	113.5	U2 small nuclear ribonucleoprotein B'' OS=Mus musculus GN=Snrpb2 =1 SV=1	Snrpb2	3.65881e+06	3.46249e+06	2.85771e+06	3.11907e+06	1.75103e+07	1.75103e+07	1.79449e+07	1.36315e+07
P14094	1	1	43.54	Sodium/potassium-transporting ATPase subunit beta-1 OS=Mus musculus GN=Atp1b1 PE=1 SV=1	Atp1b1	3.61897e+06	3.50803e+06	3.57093e+06	4.6704e+06	0	0	0	0
Q99MN1	3	3	180.93	Lysine--tRNA ligase OS=Mus musculus GN=Kars PE=1 SV=1	Kars	3.60679e+06	4.21756e+06	3.60103e+06	4.21886e+06	2.42618e+06	2.42618e+06	2.11349e+06	1.30456e+06
P61027	3	2	208.03	Ras-related protein Rab-10 OS=Mus musculus GN=Rab10 =1 SV=1	Rab10	3.60106e+06	3.62728e+06	3.67719e+06	4.16848e+06	0	0	0	0
Q8WTY4	2	2	100.4	Anamorsin OS=Mus musculus GN=Ciapin1 PE=1 SV=1	Ciapin1	3.58878e+06	2.8496e+06	2.30564e+06	3.1945e+06	0	0	0	0
Q60605	1	1	65.54	Myosin light polypeptide 6 OS=Mus musculus GN=Myl6 PE=1 SV=3	Myl6	3.57887e+06	4.17933e+06	3.96384e+06	3.8706e+06	1.89871e+06	1.89871e+06	1.81584e+06	1.62688e+06
Q9CR68	2	2	113.51	Cytochrome b-c1 complex subunit Rieske, mitochondrial OS=Mus musculus GN=Uqcrfs1 =1 SV=1	Uqcrfs1	3.57591e+06	4.06444e+06	3.396e+06	3.34619e+06	0	0	0	0
P97823	2	2	133.86	Acyl-protein thioesterase 1 OS=Mus musculus GN=Lypla1 =1 SV=1	Lypla1	3.57285e+06	3.17705e+06	2.99119e+06	2.49378e+06	0	0	0	0
Q8BL97	3	3	205.37	Serine/arginine-rich splicing factor 7 OS=Mus musculus GN=Srsf7 =1 SV=1	Srsf7	3.54902e+06	2.86252e+06	2.16638e+06	3.10271e+06	4.55447e+07	4.55447e+07	3.26279e+07	3.21012e+07
Q9CQW9	1	1	51.26	Interferon-induced transmembrane protein 3 OS=Mus musculus GN=Ifitm3 =1 SV=1	Ifitm3	3.5365e+06	6.70739e+06	4.16967e+06	6.05678e+06	0	0	0	0
P61079	1	1	45.76	Ubiquitin-conjugating enzyme E2 D3 OS=Mus musculus GN=Ube2d3 PE=1 SV=1	Ube2d3	3.53608e+06	3.02739e+06	3.45654e+06	3.12076e+06	0	0	0	0
Q9CZD3	6	6	410.28	Glycine--tRNA ligase OS=Mus musculus GN=Gars PE=1 SV=1	Gars	3.52686e+06	3.65461e+06	3.90011e+06	3.60707e+06	0	0	0	0
Q78PY7	11	11	555.64	Staphylococcal nuclease domain-containing protein 1 OS=Mus musculus GN=Snd1 =1 SV=1	Snd1	3.52275e+06	3.71281e+06	3.46639e+06	3.77378e+06	4.77736e+07	4.77736e+07	4.9676e+07	3.72967e+07
Q61425	1	1	43.75	Hydroxyacyl-coenzyme A dehydrogenase, mitochondrial OS=Mus musculus GN=Hadh PE=1 SV=2	Hadh	3.52119e+06	3.06324e+06	3.54053e+06	3.17451e+06	2.56124e+06	2.56124e+06	2.73303e+06	2.85669e+06
Q9CQV8	2	2	95.62	14-3-3 protein beta/alpha OS=Mus musculus GN=Ywhab PE=1 SV=3	Ywhab	3.51987e+06	4.27771e+06	5.04845e+06	4.55232e+06	0	0	0	0
Q9CPT4	2	2	112.54	Myeloid-derived growth factor OS=Mus musculus GN=Mydgf PE=1 SV=1	Mydgf	3.51823e+06	4.16355e+06	3.76358e+06	4.34761e+06	192333	192333	178387	197317
P47963	2	2	96.53	60S ribosomal protein L13 OS=Mus musculus GN=Rpl13 PE=1 SV=3	Rpl13	3.51725e+06	3.18948e+06	3.01168e+06	3.51869e+06	69874.4	69874.4	90651.6	77176.5
P97379	5	5	304.77	Ras GTPase-activating protein-binding protein 2 OS=Mus musculus GN=G3bp2 =1 SV=2	G3bp2	3.51131e+06	3.73739e+06	4.01939e+06	3.89874e+06	1.99217e+07	1.99217e+07	1.44764e+07	1.63363e+07
Q9JMA1	5	5	296.14	Ubiquitin carboxyl-terminal hydrolase 14 OS=Mus musculus GN=Usp14 PE=1 SV=3	Usp14	3.50585e+06	3.80642e+06	3.42333e+06	3.95583e+06	0	0	0	0
P47911	3	3	165.26	60S ribosomal protein L6 OS=Mus musculus GN=Rpl6 PE=1 SV=3	Rpl6	3.50116e+06	3.76306e+06	4.02496e+06	4.03351e+06	0	0	0	0
Q9Z1Z2	1	1	54.88	Serine-threonine kinase receptor-associated protein OS=Mus musculus GN=Strap PE=1 SV=2	Strap	3.49017e+06	4.28949e+06	3.72334e+06	5.08275e+06	3.56436e+06	3.56436e+06	3.73328e+06	3.43576e+06
Q6ZWX6	6	6	377.76	Eukaryotic translation initiation factor 2 subunit 1 OS=Mus musculus GN=Eif2s1 =1 SV=3	Eif2s1	3.47071e+06	3.21629e+06	3.63456e+06	4.1306e+06	2.08235e+07	2.08235e+07	2.69043e+07	2.83136e+07
P61924	1	1	46.9	Coatomer subunit zeta-1 OS=Mus musculus GN=Copz1 =1 SV=1	Copz1	3.43461e+06	3.08647e+06	3.28579e+06	3.91684e+06	0	0	0	0
Q6NXN1	1	1	52.56	SUZ domain-containing protein 1 OS=Mus musculus GN=Szrd1 PE=1 SV=1	Szrd1	3.43302e+06	2.69019e+06	3.21321e+06	3.31573e+06	0	0	0	0
P48428	1	1	41.71	Tubulin-specific chaperone A OS=Mus musculus GN=Tbca PE=1 SV=3	Tbca	3.40887e+06	4.64712e+06	3.83204e+06	4.12334e+06	0	0	0	0
P07742	5	5	218.64	Ribonucleoside-diphosphate reductase large subunit OS=Mus musculus GN=Rrm1 =1 SV=2	Rrm1	3.40664e+06	3.17814e+06	3.08192e+06	3.19913e+06	0	0	0	0
Q6ZQI3	2	2	99.6	Malectin OS=Mus musculus GN=Mlec =1 SV=2	Mlec	3.38707e+06	3.43043e+06	2.37536e+06	3.42616e+06	0	0	0	0
P56399	4	4	227.54	Ubiquitin carboxyl-terminal hydrolase 5 OS=Mus musculus GN=Usp5 PE=1 SV=1	Usp5	3.36029e+06	3.25111e+06	3.47089e+06	4.54705e+06	0	0	0	0
P84089	3	3	130.64	Enhancer of rudimentary homolog OS=Mus musculus GN=Erh =1 SV=1	Erh	3.32484e+06	2.82998e+06	2.45562e+06	3.18291e+06	1.84445e+06	1.84445e+06	1.22454e+06	1.74398e+06
Q8BHN3	4	4	217.57	Neutral alpha-glucosidase AB OS=Mus musculus GN=Ganab PE=1 SV=1	Ganab	3.29688e+06	3.2202e+06	2.54447e+06	3.40827e+06	1.22214e+06	1.22214e+06	1.51639e+06	1.6709e+06
Q80XN0	1	1	66.03	D-beta-hydroxybutyrate dehydrogenase, mitochondrial OS=Mus musculus GN=Bdh1 =1 SV=2	Bdh1	3.27032e+06	3.52003e+06	3.81099e+06	3.00185e+06	0	0	0	0
Q9D0B6	1	1	44.21	Protein PBDC1 OS=Mus musculus GN=Pbdc1 PE=1 SV=1	Pbdc1	3.2543e+06	3.27742e+06	3.61491e+06	3.80908e+06	0	0	0	0
Q9Z0J0	4	4	153.18	Epididymal secretory protein E1 OS=Mus musculus GN=Npc2 =1 SV=1	Npc2	3.24376e+06	4.00946e+06	3.98151e+06	4.12097e+06	0	0	0	0
P09055	6	6	338.57	Integrin beta-1 OS=Mus musculus GN=Itgb1 =1 SV=1	Itgb1	3.23639e+06	3.15573e+06	2.81739e+06	3.45807e+06	0	0	0	0
Q9CX34	3	3	156.21	Protein SGT1 homolog OS=Mus musculus GN=Sugt1 PE=1 SV=3	Sugt1	3.21847e+06	3.25542e+06	2.92135e+06	3.64923e+06	147678	147678	145133	181656
O08749	4	4	182.74	Dihydrolipoyl dehydrogenase, mitochondrial OS=Mus musculus GN=Dld =1 SV=2	Dld	3.21102e+06	3.26796e+06	3.40555e+06	3.41365e+06	3.85928e+06	3.85928e+06	3.73845e+06	4.365e+06
P62245	1	1	43.04	40S ribosomal protein S15a OS=Mus musculus GN=Rps15a PE=1 SV=2	Rps15a	3.17922e+06	3.08261e+06	3.31291e+06	3.81594e+06	1.18471e+06	1.18471e+06	1.08964e+06	1.46218e+06
Q9DB77	5	5	252.5	Cytochrome b-c1 complex subunit 2, mitochondrial OS=Mus musculus GN=Uqcrc2 =1 SV=1	Uqcrc2	3.16332e+06	2.60625e+06	2.72348e+06	3.17326e+06	161685	161685	232147	324005
Q3THE2	1	1	41.46	Myosin regulatory light chain 12B OS=Mus musculus GN=Myl12b =1 SV=2	Myl12b	3.16153e+06	2.7996e+06	3.32251e+06	3.43432e+06	576131	576131	738412	686531
Q02819	2	2	100.8	Nucleobindin-1 OS=Mus musculus GN=Nucb1 PE=1 SV=2	Nucb1	3.14642e+06	3.50143e+06	2.44555e+06	3.14046e+06	780871	780871	583479	661515
Q3TXS7	2	2	107.88	26S proteasome non-ATPase regulatory subunit 1 OS=Mus musculus GN=Psmd1 PE=1 SV=1	Psmd1	3.14446e+06	2.82395e+06	3.06244e+06	3.53535e+06	0	0	182511	156174
Q9CWW6	2	2	194.35	ptidyl-prolyl cis-trans isomerase NIMA-interacting 4 OS=Mus musculus GN=Pin4 =1 SV=1	Pin4	3.14027e+06	3.34089e+06	2.39575e+06	3.06933e+06	254652	254652	269479	348174
Q8CIN4	2	2	93.45	Serine/threonine-protein kinase PAK 2 OS=Mus musculus GN=Pak2 =1 SV=1	Pak2	3.11924e+06	3.41016e+06	3.78633e+06	3.13199e+06	0	0	0	0
P57784	2	2	83.04	U2 small nuclear ribonucleoprotein A' OS=Mus musculus GN=Snrpa1 =1 SV=2	Snrpa1	3.11598e+06	3.12654e+06	2.93387e+06	2.72979e+06	2.24231e+07	2.24231e+07	2.10538e+07	2.29204e+07
P61327	4	4	248.49	Protein mago nashi homolog OS=Mus musculus GN=Magoh =2 SV=1	Magoh	3.11042e+06	3.84227e+06	3.46926e+06	3.97444e+06	7.08061e+06	7.08061e+06	9.00527e+06	7.8238e+06
P14115	2	2	139.43	60S ribosomal protein L27a OS=Mus musculus GN=Rpl27a PE=1 SV=5	Rpl27a	3.11028e+06	3.89035e+06	3.65042e+06	4.0042e+06	757313	757313	708428	1.08776e+06
Q9CQE8	4	4	214.66	UPF0568 protein C14orf166 homolog OS=Mus musculus =1 SV=1	1SV	3.08405e+06	3.13797e+06	3.67548e+06	2.81216e+06	3.6268e+06	3.6268e+06	4.4534e+06	5.34198e+06
Q8R3Q6	2	2	290.04	Coiled-coil domain-containing protein 58 OS=Mus musculus GN=Ccdc58 =1 SV=1	Ccdc58	3.08274e+06	3.27083e+06	3.44935e+06	3.21684e+06	3.98677e+06	3.98677e+06	3.76059e+06	3.98787e+06
Q9D0S9	2	2	90.76	Histidine triad nucleotide-binding protein 2, mitochondrial OS=Mus musculus GN=Hint2 PE=1 SV=1	Hint2	3.08167e+06	3.68355e+06	3.85959e+06	4.46986e+06	1.97106e+06	1.97106e+06	1.70917e+06	1.85225e+06
Q03958	3	3	196.67	Prefoldin subunit 6 OS=Mus musculus GN=Pfdn6 PE=1 SV=1	Pfdn6	3.07054e+06	2.88947e+06	3.25651e+06	3.72659e+06	246914	246914	9169.28	0
Q6ZWV7	3	3	170.4	60S ribosomal protein L35 OS=Mus musculus GN=Rpl35 PE=1 SV=1	Rpl35	3.07039e+06	3.34293e+06	3.65657e+06	3.71541e+06	306761	306761	262595	241109
Q9CW46	4	4	219.63	Ribonucleoprotein PTB-binding 1 OS=Mus musculus GN=Raver1 =1 SV=2	Raver1	3.06353e+06	2.75576e+06	3.06097e+06	2.28693e+06	5.49372e+06	5.49372e+06	8.55202e+06	9.94711e+06
Q9CPQ3	3	3	218.14	Mitochondrial import receptor subunit TOM22 homolog OS=Mus musculus GN=Tomm22 =1 SV=3	Tomm22	3.05399e+06	2.73546e+06	2.84667e+06	3.26865e+06	0	0	0	0
Q9CQS7	4	4	167.01	Developmental pluripotency-associated protein 5A OS=Mus musculus GN=Dppa5a =1 SV=2	Dppa5a	3.04641e+06	2.89074e+06	2.96393e+06	3.1217e+06	0	0	0	0
P47791	1	1	68.97	Glutathione reductase, mitochondrial OS=Mus musculus GN=Gsr PE=1 SV=3	Gsr	3.03576e+06	3.36043e+06	3.80938e+06	3.84132e+06	0	0	0	0
P25425	2	2	91.3	POU domain, class 2, transcription factor 1 OS=Mus musculus GN=Pou2f1 =1 SV=3	Pou2f1	3.02257e+06	2.77261e+06	3.45105e+06	3.1425e+06	2.43881e+06	2.43881e+06	1.82933e+06	2.25933e+06
P63024	4	4	308.2	Vesicle-associated membrane protein 3 OS=Mus musculus GN=Vamp3 =1 SV=1	Vamp3	3.01611e+06	2.74146e+06	2.81723e+06	3.69704e+06	733102	733102	578553	826829
Q9CZR8	2	2	116.47	Elongation factor Ts, mitochondrial OS=Mus musculus GN=Tsfm =1 SV=1	Tsfm	3.01126e+06	3.44214e+06	3.36847e+06	4.005e+06	5.19723e+06	5.19723e+06	6.05658e+06	6.99354e+06
Q91WS0	3	3	269.4	CDGSH iron-sulfur domain-containing protein 1 OS=Mus musculus GN=Cisd1 =1 SV=1	Cisd1	3.0071e+06	3.37655e+06	3.21293e+06	3.84144e+06	0	0	0	0
Q64520	1	1	82.27	Guanylate kinase OS=Mus musculus GN=Guk1 PE=1 SV=2	Guk1	3.00648e+06	2.9316e+06	2.6362e+06	2.74092e+06	0	0	0	0
Q9Z0U1	4	4	197.98	Tight junction protein ZO-2 OS=Mus musculus GN=Tjp2 =1 SV=2	Tjp2	3.00554e+06	2.49492e+06	2.03303e+06	2.8821e+06	491944	491944	621361	437628
Q9ERE7	3	3	159.94	LDLR charone MESD OS=Mus musculus GN=Mesdc2 =1 SV=1	Mesdc2	2.99886e+06	2.72712e+06	2.4166e+06	3.03469e+06	0	0	0	0
Q99JI4	2	2	113.16	26S proteasome non-ATPase regulatory subunit 6 OS=Mus musculus GN=Psmd6 PE=1 SV=1	Psmd6	2.98934e+06	2.84615e+06	2.16228e+06	2.62922e+06	0	0	0	0
Q8VEE4	6	6	365.22	Replication protein A 70 kDa DNA-binding subunit OS=Mus musculus GN=Rpa1 =1 SV=1	Rpa1	2.98769e+06	3.05535e+06	3.14992e+06	3.76956e+06	6.60775e+06	6.60775e+06	8.1161e+06	9.7224e+06
Q52KI8	1	1	102.24	Serine/arginine retitive matrix protein 1 OS=Mus musculus GN=Srrm1 =1 SV=2	Srrm1	2.97127e+06	2.34356e+06	2.33368e+06	2.54184e+06	2.96776e+06	2.96776e+06	3.57906e+06	3.33498e+06
P62264	4	4	251.83	40S ribosomal protein S14 OS=Mus musculus GN=Rps14 PE=1 SV=3	Rps14	2.9675e+06	3.57089e+06	2.88612e+06	3.61497e+06	1.34967e+06	1.34967e+06	749648	660150
Q587J6	7	7	344.49	LINE-1 ty transposase domain-containing protein 1 OS=Mus musculus GN=L1td1 =2 SV=1	L1td1	2.9653e+06	2.36483e+06	2.82198e+06	2.79847e+06	7.23639e+06	7.23639e+06	6.96e+06	5.40601e+06
Q9CQQ7	4	4	283.25	ATP synthase F(0) complex subunit B1, mitochondrial OS=Mus musculus GN=Atp5f1 =1 SV=1	Atp5f1	2.96483e+06	2.93702e+06	2.57358e+06	3.52146e+06	0	0	0	0
P54071	4	4	199.41	Isocitrate dehydrogenase [NADP], mitochondrial OS=Mus musculus GN=Idh2 =1 SV=3	Idh2	2.96424e+06	2.63179e+06	2.52836e+06	2.70691e+06	3.52788e+06	3.52788e+06	3.6931e+06	3.87424e+06
Q9CRB9	6	6	325.82	MICOS complex subunit Mic19 OS=Mus musculus GN=Chchd3 =1 SV=1	Chchd3	2.94814e+06	2.986e+06	2.79101e+06	3.58651e+06	0	0	0	0
P27659	4	4	253.96	60S ribosomal protein L3 OS=Mus musculus GN=Rpl3 PE=1 SV=3	Rpl3	2.9369e+06	2.86195e+06	2.61844e+06	2.95325e+06	802415	802415	882189	1.08745e+06
Q3UQA7	1	1	42.73	Selenoprotein H OS=Mus musculus GN=Selh =1 SV=2	Selh	2.92645e+06	3.02352e+06	2.40456e+06	2.93733e+06	6.12291e+06	6.12291e+06	7.96526e+06	6.98094e+06
Q8BIQ5	5	5	247.45	Cleavage stimulation factor subunit 2 OS=Mus musculus GN=Cstf2 =1 SV=2	Cstf2	2.9239e+06	2.91954e+06	2.79994e+06	3.47975e+06	1.06872e+07	1.06872e+07	8.83418e+06	8.35989e+06
Q8BVY0	14	14	827.71	Ribosomal L1 domain-containing protein 1 OS=Mus musculus GN=Rsl1d1 PE=1 SV=1	Rsl1d1	2.91906e+06	3.61904e+06	3.78574e+06	3.65291e+06	1.13679e+06	1.13679e+06	645835	900447
Q501J6	4	4	254.7	Probable ATP-dendent RNA helicase DDX17 OS=Mus musculus GN=Ddx17 =1 SV=1	Ddx17	2.91356e+06	2.95889e+06	2.4601e+06	2.90942e+06	2.4225e+07	2.4225e+07	1.77281e+07	1.69673e+07
Q9Z2N8	6	6	349.39	Actin-like protein 6A OS=Mus musculus GN=Actl6a =1 SV=2	Actl6a	2.89306e+06	3.02956e+06	2.91623e+06	3.5583e+06	3.37497e+07	3.37497e+07	3.25839e+07	2.71097e+07
Q63850	1	1	118.45	Nuclear pore glycoprotein p62 OS=Mus musculus GN=Nup62 =1 SV=2	Nup62	2.88293e+06	2.69771e+06	2.71885e+06	2.71363e+06	7.58109e+06	7.58109e+06	7.83155e+06	6.82464e+06
Q9JMG1	5	5	318.45	Endothelial differentiation-related factor 1 OS=Mus musculus GN=Edf1 =1 SV=1	Edf1	2.87598e+06	2.23659e+06	2.51665e+06	3.00468e+06	1.06409e+07	1.06409e+07	1.06733e+07	9.7865e+06
O08583	2	2	235.84	THO complex subunit 4 OS=Mus musculus GN=Alyref =1 SV=3	Alyref	2.86874e+06	3.72222e+06	2.52072e+06	3.43419e+06	1.95517e+07	1.95517e+07	2.00353e+07	2.10743e+07
Q9WVK4	6	6	439.11	EH domain-containing protein 1 OS=Mus musculus GN=Ehd1 =1 SV=1	Ehd1	2.85852e+06	2.54659e+06	2.90461e+06	2.92832e+06	0	0	0	0
P11440	5	5	230.35	Cyclin-dendent kinase 1 OS=Mus musculus GN=Cdk1 =1 SV=3	Cdk1	2.85801e+06	3.30439e+06	2.40576e+06	2.75107e+06	4.39094e+06	4.39094e+06	3.92482e+06	4.26279e+06
Q9D1P4	1	1	51.86	Cysteine and histidine-rich domain-containing protein 1 OS=Mus musculus GN=Chordc1 PE=1 SV=1	Chordc1	2.85465e+06	2.71094e+06	2.51564e+06	2.40981e+06	0	0	0	0
P52624	2	2	119.51	Uridine phosphorylase 1 OS=Mus musculus GN=Upp1 PE=1 SV=2	Upp1	2.85352e+06	2.2253e+06	3.51804e+06	4.49833e+06	0	0	0	0
Q03173	3	3	248.53	Protein enabled homolog OS=Mus musculus GN=Enah =1 SV=2	Enah	2.84409e+06	2.38757e+06	2.77891e+06	2.10984e+06	253.82	253.82	655.088	1850.61
P61161	5	5	340.17	Actin-related protein 2 OS=Mus musculus GN=Actr2 =1 SV=1	Actr2	2.82448e+06	3.23463e+06	3.06743e+06	3.30771e+06	188229	188229	583568	1.11719e+06
P97930	2	2	112	Thymidylate kinase OS=Mus musculus GN=Dtymk PE=1 SV=2	Dtymk	2.82355e+06	2.35522e+06	2.24806e+06	2.78002e+06	0	0	0	0
Q8BK30	1	1	38.45	NADH dehydrogenase [ubiquinone] flavoprotein 3, mitochondrial OS=Mus musculus GN=Ndufv3 =1 SV=1	Ndufv3	2.82132e+06	4.10434e+06	3.40868e+06	3.34034e+06	0	0	0	0
Q9CQ75	2	2	123.4	NADH dehydrogenase [ubiquinone] 1 alpha subcomplex subunit 2 OS=Mus musculus GN=Ndufa2 =1 SV=3	Ndufa2	2.81521e+06	2.66513e+06	2.42757e+06	3.34888e+06	136234	136234	682733	811369
P59325	4	3	177.8	Eukaryotic translation initiation factor 5 OS=Mus musculus GN=Eif5 =1 SV=1	Eif5	2.81271e+06	2.63614e+06	2.24237e+06	2.60533e+06	4.46751e+06	4.46751e+06	4.19413e+06	4.02891e+06
Q9QYS9	4	4	207.66	Protein quaking OS=Mus musculus GN=Qki =1 SV=1	Qki	2.80744e+06	3.01777e+06	2.54115e+06	3.24169e+06	9.82589e+06	9.82589e+06	9.06033e+06	1.01496e+07
O35127	3	3	148.97	Protein C10 OS=Mus musculus GN=Grcc10 =1 SV=1	Grcc10	2.80117e+06	3.00522e+06	2.96124e+06	3.04288e+06	21561	21561	146727	0
P45952	5	5	342.24	Medium-chain scific acyl-CoA dehydrogenase, mitochondrial OS=Mus musculus GN=Acadm =1 SV=1	Acadm	2.79757e+06	3.04931e+06	2.81938e+06	2.92464e+06	5.10963e+06	5.10963e+06	4.98925e+06	2.97443e+06
P97821	1	1	66.95	Dipeptidyl peptidase 1 OS=Mus musculus GN=Ctsc PE=1 SV=1	Ctsc	2.78826e+06	2.51019e+06	2.0224e+06	2.46879e+06	0	0	0	0
Q91VC3	1	1	61.18	Eukaryotic initiation factor 4A-III OS=Mus musculus GN=Eif4a3 =1 SV=3	Eif4a3	2.78641e+06	2.77289e+06	3.58686e+06	3.03932e+06	6.58772e+06	6.58772e+06	6.26001e+06	6.71051e+06
P61759	2	2	87.71	Prefoldin subunit 3 OS=Mus musculus GN=Vbp1 =1 SV=2	Vbp1	2.78496e+06	2.83488e+06	2.47301e+06	3.22851e+06	0	0	0	0
Q9D7S7	1	1	112.74	60S ribosomal protein L22-like 1 OS=Mus musculus GN=Rpl22l1 PE=1 SV=1	Rpl22l1	2.78457e+06	2.23466e+06	2.04693e+06	2.51488e+06	0	0	0	0
Q9D2M8	3	3	161.52	Ubiquitin-conjugating enzyme E2 variant 2 OS=Mus musculus GN=Ube2v2 PE=1 SV=4	Ube2v2	2.77368e+06	2.71034e+06	2.60584e+06	2.68318e+06	0	0	0	0
Q922D8	8	8	497.97	C-1-tetrahydrofolate synthase, cytoplasmic OS=Mus musculus GN=Mthfd1 =1 SV=4	Mthfd1	2.7712e+06	2.60436e+06	3.15846e+06	2.9333e+06	4.12185e+06	4.12185e+06	8.64984e+06	8.61235e+06
P84104	2	2	156.12	Serine/arginine-rich splicing factor 3 OS=Mus musculus GN=Srsf3 =1 SV=1	Srsf3	2.76749e+06	4.58724e+06	4.59814e+06	2.94785e+06	4.23075e+07	4.23075e+07	3.30115e+07	3.32579e+07
Q9CZ13	1	1	44.53	Cytochrome b-c1 complex subunit 1, mitochondrial OS=Mus musculus GN=Uqcrc1 PE=1 SV=2	Uqcrc1	2.76348e+06	2.18977e+06	2.31502e+06	2.64703e+06	335257	335257	245968	87589.6
P48771	1	1	92.65	Cytochrome c oxidase subunit 7A2, mitochondrial OS=Mus musculus GN=Cox7a2 =1 SV=2	Cox7a2	2.75416e+06	3.08393e+06	2.34773e+06	2.43733e+06	0	0	0	0
P54775	2	2	89.03	26S protease regulatory subunit 6B OS=Mus musculus GN=Psmc4 PE=1 SV=2	Psmc4	2.75312e+06	2.59485e+06	2.67763e+06	2.6517e+06	0	0	86542.3	0
Q9QUI0	2	2	127.5	Transforming protein RhoA OS=Mus musculus GN=Rhoa PE=1 SV=1	Rhoa	2.72047e+06	2.63716e+06	2.04559e+06	2.50295e+06	0	0	0	0
Q8VEE0	1	1	41.13	Ribulose-phosphate 3-epimerase OS=Mus musculus GN=Rpe PE=1 SV=1	Rpe	2.70171e+06	2.20571e+06	2.2287e+06	2.23558e+06	0	0	0	0
Q8BMK4	11	11	591.69	Cytoskeleton-associated protein 4 OS=Mus musculus GN=Ckap4 =1 SV=2	Ckap4	2.67639e+06	2.74447e+06	3.09683e+06	3.29944e+06	0	0	0	0
Q9CR98	6	6	347.54	Protein FAM136A OS=Mus musculus GN=Fam136a =1 SV=1	Fam136a	2.66849e+06	2.38934e+06	2.48342e+06	2.6808e+06	3.52342e+06	3.52342e+06	2.33226e+06	2.22427e+06
Q9D819	1	1	66.16	Inorganic pyrophosphatase OS=Mus musculus GN=Ppa1 PE=1 SV=1	Ppa1	2.66273e+06	2.72493e+06	2.56446e+06	2.81366e+06	0	0	0	0
Q6NZJ6	3	3	188.22	Eukaryotic translation initiation factor 4 gamma 1 OS=Mus musculus GN=Eif4g1 =1 SV=1	Eif4g1	2.64858e+06	2.06259e+06	2.30814e+06	2.33518e+06	2.177e+06	2.177e+06	2.2404e+06	2.44248e+06
P46638	3	3	148.41	Ras-related protein Rab-11B OS=Mus musculus GN=Rab11b PE=1 SV=3	Rab11b	2.64399e+06	2.86688e+06	2.98431e+06	3.32229e+06	197694	197694	156803	11796.9
Q9CQA3	4	4	192.84	Succinate dehydrogenase [ubiquinone] iron-sulfur subunit, mitochondrial OS=Mus musculus GN=Sdhb =1 SV=1	Sdhb	2.63795e+06	2.68442e+06	2.6869e+06	2.56985e+06	269024	269024	318099	138618
P62830	4	4	198.44	60S ribosomal protein L23 OS=Mus musculus GN=Rpl23 =1 SV=1	Rpl23	2.63566e+06	2.87009e+06	3.01956e+06	3.75652e+06	3.79077e+06	3.79077e+06	3.95028e+06	3.38907e+06
Q9CXY6	4	4	327.83	Interleukin enhancer-binding factor 2 OS=Mus musculus GN=Ilf2 =1 SV=1	Ilf2	2.61224e+06	2.61021e+06	2.73626e+06	2.95151e+06	3.61693e+07	3.61693e+07	3.49624e+07	4.40713e+07
P61025	1	1	53.83	Cyclin-dendent kinases regulatory subunit 1 OS=Mus musculus GN=Cks1b =3 SV=1	Cks1b	2.60532e+06	2.83316e+06	2.22048e+06	2.36453e+06	3.48468e+06	3.48468e+06	4.03306e+06	4.87479e+06
O54734	5	5	326.86	Dolichyl-diphosphooligosaccharide--protein glycosyltransferase 48 kDa subunit OS=Mus musculus GN=Ddost =1 SV=2	Ddost	2.59733e+06	2.54023e+06	2.46662e+06	2.7165e+06	0	0	0	0
P51855	4	4	240.51	Glutathione synthetase OS=Mus musculus GN=Gss PE=1 SV=1	Gss	2.58829e+06	2.78636e+06	2.4463e+06	2.76493e+06	0	0	0	0
Q9WV91	6	6	336.97	Prostaglandin F2 receptor negative regulator OS=Mus musculus GN=Ptgfrn =1 SV=2	Ptgfrn	2.57851e+06	2.74991e+06	2.57431e+06	2.61222e+06	0	0	0	0
Q9D1L9	1	1	53.83	Ragulator complex protein LAMTOR5 OS=Mus musculus GN=Lamtor5 =1 SV=1	Lamtor5	2.57696e+06	3.035e+06	2.3271e+06	2.95461e+06	0	0	0	0
Q9R0P4	1	1	30.23	Small acidic protein OS=Mus musculus GN=Smap =1 SV=1	Smap	2.57321e+06	2.34522e+06	1.34703e+06	1.63191e+06	0	0	0	0
P29595	2	2	89.49	NEDD8 OS=Mus musculus GN=Nedd8 PE=1 SV=2	Nedd8	2.5534e+06	2.5296e+06	2.51959e+06	2.59864e+06	52991.4	52991.4	0	74622.8
Q91W90	1	1	40.02	Thioredoxin domain-containing protein 5 OS=Mus musculus GN=Txndc5 PE=1 SV=2	Txndc5	2.55111e+06	2.41379e+06	2.37988e+06	2.187e+06	373598	373598	426277	23322.7
Q9D554	3	3	195.7	Splicing factor 3A subunit 3 OS=Mus musculus GN=Sf3a3 =1 SV=2	Sf3a3	2.55039e+06	2.36301e+06	2.30604e+06	2.7681e+06	1.86269e+07	1.86269e+07	1.20266e+07	7.84691e+06
Q6PDM2	4	4	208.79	Serine/arginine-rich splicing factor 1 OS=Mus musculus GN=Srsf1 =1 SV=3	Srsf1	2.54925e+06	2.32513e+06	2.51505e+06	2.95519e+06	1.0087e+08	1.0087e+08	9.52741e+07	9.87046e+07
P30412	1	1	79.31	ptidyl-prolyl cis-trans isomerase C OS=Mus musculus GN=Ppic =1 SV=1	Ppic	2.52775e+06	2.54703e+06	2.07777e+06	2.62487e+06	0	0	0	0
Q99JF5	1	1	68.48	Diphosphomevalonate decarboxylase OS=Mus musculus GN=Mvd PE=1 SV=2	Mvd	2.5238e+06	2.49655e+06	2.41151e+06	2.45099e+06	0	0	0	0
Q8VDW0	2	2	92.42	ATP-dendent RNA helicase DDX39A OS=Mus musculus GN=Ddx39a =1 SV=1	Ddx39a	2.52197e+06	1.97185e+06	2.4567e+06	2.54515e+06	2.24479e+07	2.24479e+07	1.60452e+07	1.67518e+07
Q9CQP3	1	1	55.95	Coiled-coil-helix-coiled-coil-helix domain-containing protein 5 OS=Mus musculus GN=Chchd5 PE=1 SV=1	Chchd5	2.51855e+06	2.93503e+06	2.82018e+06	2.91091e+06	900370	900370	615356	753485
Q9QZH3	3	3	208.3	ptidyl-prolyl cis-trans isomerase E OS=Mus musculus GN=Ppie =1 SV=2	Ppie	2.51466e+06	2.40521e+06	2.21308e+06	2.50162e+06	3.25587e+06	3.25587e+06	2.96389e+06	2.13989e+06
O54941	6	6	418.76	SWI/SNF-related matrix-associated actin-dendent regulator of chromatin subfamily E member 1 OS=Mus musculus GN=Smarce1 =1 SV=1	Smarce1	2.51239e+06	2.78735e+06	3.10059e+06	3.2391e+06	2.66216e+07	2.66216e+07	2.69679e+07	1.4998e+07
Q8K2B3	8	8	558.04	Succinate dehydrogenase [ubiquinone] flavoprotein subunit, mitochondrial OS=Mus musculus GN=Sdha =1 SV=1	Sdha	2.50982e+06	2.94456e+06	2.77599e+06	2.85797e+06	3.49195e+06	3.49195e+06	3.46598e+06	4.26733e+06
Q9CQZ5	2	2	104.07	NADH dehydrogenase [ubiquinone] 1 alpha subcomplex subunit 6 OS=Mus musculus GN=Ndufa6 =1 SV=1	Ndufa6	2.50967e+06	2.4912e+06	2.42745e+06	2.4772e+06	0	0	0	0
Q62422	2	2	95.98	Osteoclast-stimulating factor 1 OS=Mus musculus GN=Ostf1 PE=1 SV=2	Ostf1	2.50569e+06	2.00586e+06	2.43384e+06	2.30446e+06	0	0	0	0
Q78JW9	1	1	50.72	Ubiquitin domain-containing protein UBFD1 OS=Mus musculus GN=Ubfd1 =1 SV=2	Ubfd1	2.50123e+06	2.71345e+06	1.74977e+06	2.67796e+06	0	0	0	0
P62702	3	3	119.78	40S ribosomal protein S4, X isoform OS=Mus musculus GN=Rps4x PE=1 SV=2	Rps4x	2.49651e+06	2.17949e+06	2.1622e+06	2.46722e+06	173294	173294	350995	131549
P19324	3	3	159.41	Serpin H1 OS=Mus musculus GN=Serpinh1 =1 SV=3	Serpinh1	2.48984e+06	2.32673e+06	2.77933e+06	2.7282e+06	2.036e+06	2.036e+06	2.15723e+06	1.64019e+06
Q91YQ5	5	5	262.01	Dolichyl-diphosphooligosaccharide--protein glycosyltransferase subunit 1 OS=Mus musculus GN=Rpn1 =1 SV=1	Rpn1	2.48979e+06	2.47238e+06	2.55463e+06	2.6047e+06	0	0	0	0
P56390	1	1	40.87	Cyclin-dependent kinases regulatory subunit 2 OS=Mus musculus GN=Cks2 PE=1 SV=1	Cks2	2.48827e+06	2.35837e+06	2.29783e+06	2.55386e+06	2.43577e+06	2.43577e+06	3.73222e+06	459103
Q9DCH4	4	4	217.34	Eukaryotic translation initiation factor 3 subunit F OS=Mus musculus GN=Eif3f =1 SV=2	Eif3f	2.47686e+06	2.44666e+06	2.62548e+06	2.9557e+06	1.16618e+06	1.16618e+06	1.3341e+06	1.35042e+06
Q62384	1	1	49.16	Zinc finger protein ZPR1 OS=Mus musculus GN=Zpr1 PE=1 SV=1	Zpr1	2.46403e+06	2.3221e+06	2.5441e+06	2.82462e+06	0	0	0	0
Q8K183	1	1	38.52	Pyridoxal kinase OS=Mus musculus GN=Pdxk PE=1 SV=1	Pdxk	2.46131e+06	3.54526e+06	3.17944e+06	3.42307e+06	0	0	0	0
P18608	1	1	68.74	Non-histone chromosomal protein HMG-14 OS=Mus musculus GN=Hmgn1 =1 SV=2	Hmgn1	2.45768e+06	2.24323e+06	1.63687e+06	5819.67	7.31906e+07	7.31906e+07	9.47793e+07	6.1778e+07
P50431	6	6	333.31	Serine hydroxymethyltransferase, cytosolic OS=Mus musculus GN=Shmt1 =1 SV=3	Shmt1	2.45271e+06	2.2707e+06	3.08353e+06	2.98908e+06	2.70443e+07	2.70443e+07	3.35384e+07	2.79208e+07
Q9JK81	3	3	197.65	UPF0160 protein MYG1, mitochondrial OS=Mus musculus GN=Myg1 PE=1 SV=1	Myg1	2.45174e+06	2.61352e+06	2.58503e+06	3.04564e+06	0	0	0	0
Q9CQ65	1	1	48.44	S-methyl-5'-thioadenosine phosphorylase OS=Mus musculus GN=Mtap PE=1 SV=1	Mtap	2.44828e+06	2.51308e+06	2.72937e+06	2.31478e+06	0	0	0	0
P09528	1	1	42.66	Ferritin heavy chain OS=Mus musculus GN=Fth1 PE=1 SV=2	Fth1	2.43735e+06	2.07755e+06	2.49864e+06	2.64505e+06	0	0	0	0
Q99J93	2	2	87.19	Interferon-induced transmembrane protein 2 OS=Mus musculus GN=Ifitm2 =1 SV=1	Ifitm2	2.43486e+06	2.58216e+06	2.43653e+06	2.50684e+06	0	0	0	0
Q9D8M4	5	5	278.53	60S ribosomal protein L7-like 1 OS=Mus musculus GN=Rpl7l1 PE=1 SV=1	Rpl7l1	2.41336e+06	2.12199e+06	2.3608e+06	2.06115e+06	0	0	0	0
O70492	2	2	94.72	Sorting nexin-3 OS=Mus musculus GN=Snx3 PE=1 SV=3	Snx3	2.39756e+06	2.66677e+06	2.1779e+06	3.01424e+06	775849	775849	642006	601969
P62073	1	1	44.35	Mitochondrial import inner membrane translocase subunit Tim10 OS=Mus musculus GN=Timm10 PE=1 SV=1	Timm10	2.39676e+06	2.79135e+06	1.96697e+06	2.75737e+06	0	0	0	0
Q91Z38	1	1	56.42	Tetratricoptide reat protein 1 OS=Mus musculus GN=Ttc1 =1 SV=1	Ttc1	2.39598e+06	2.16654e+06	1.65223e+06	1.82301e+06	0	0	0	0
P26039	12	12	594.78	Talin-1 OS=Mus musculus GN=Tln1 =1 SV=2	Tln1	2.39541e+06	2.36786e+06	2.19491e+06	2.38336e+06	0	0	0	0
Q99JY9	1	1	49.13	Actin-related protein 3 OS=Mus musculus GN=Actr3 =1 SV=3	Actr3	2.3942e+06	2.27642e+06	2.33166e+06	2.38949e+06	0	0	0	0
O09167	3	3	258.4	60S ribosomal protein L21 OS=Mus musculus GN=Rpl21 PE=1 SV=3	Rpl21	2.38498e+06	2.56039e+06	2.60087e+06	2.68924e+06	0	0	0	0
Q9ERF3	2	2	83.05	WD reat-containing protein 61 OS=Mus musculus GN=Wdr61 =1 SV=1	Wdr61	2.3828e+06	2.02373e+06	2.18796e+06	2.46937e+06	0	0	0	0
Q9Z2W0	1	1	57.01	Aspartyl aminopeptidase OS=Mus musculus GN=Dnpep PE=1 SV=2	Dnpep	2.3784e+06	2.47668e+06	2.45672e+06	2.28038e+06	0	0	0	0
Q3TLH4	11	11	577.44	Protein PRRC2C OS=Mus musculus GN=Prrc2c =1 SV=3	Prrc2c	2.37536e+06	2.22719e+06	1.78245e+06	2.28827e+06	707772	707772	725872	925638
Q9JIW9	5	5	245.61	Ras-related protein Ral-B OS=Mus musculus GN=Ralb =1 SV=1	Ralb	2.372e+06	2.99218e+06	2.42817e+06	3.22349e+06	0	0	0	0
Q61739	3	3	175.77	Integrin alpha-6 OS=Mus musculus GN=Itga6 =1 SV=3	Itga6	2.36454e+06	2.34973e+06	2.49395e+06	2.13594e+06	0	0	0	0
Q62348	3	3	152.38	Translin OS=Mus musculus GN=Tsn PE=1 SV=1	Tsn	2.36028e+06	2.05574e+06	2.09317e+06	2.08192e+06	0	0	0	0
Q8VI33	1	1	33.82	Transcription initiation factor TFIID subunit 9 OS=Mus musculus GN=Taf9 =1 SV=1	Taf9	2.3537e+06	2.39977e+06	2.67442e+06	2.49324e+06	2.22252e+06	2.22252e+06	2.11944e+06	599177
Q99MI1	1	1	48.11	ELKS/Rab6-interacting/CAST family member 1 OS=Mus musculus GN=Erc1 =1 SV=1	Erc1	2.35335e+06	1.74994e+06	1.88283e+06	1.84004e+06	0	0	0	0
P28658	1	1	49.31	Ataxin-10 OS=Mus musculus GN=Atxn10 PE=1 SV=2	Atxn10	2.34903e+06	2.6221e+06	2.4979e+06	2.10336e+06	0	0	0	0
P67871	2	2	108.67	Casein kinase II subunit beta OS=Mus musculus GN=Csnk2b =1 SV=1	Csnk2b	2.34676e+06	1.79433e+06	1.99754e+06	1.831e+06	1.52792e+06	1.52792e+06	1.64849e+06	1.37117e+06
Q505B7	1	1	68.31	Protein archease OS=Mus musculus GN=Zbtb8os =1 SV=2	Zbtb8os	2.34255e+06	2.82032e+06	2.32371e+06	2.99729e+06	0	0	0	0
Q7TPR4	2	2	103.39	Alpha-actinin-1 OS=Mus musculus GN=Actn1 PE=1 SV=1	Actn1	2.34016e+06	1.99583e+06	2.30049e+06	1.48783e+06	0	0	0	0
Q8BY71	1	1	62.5	Histone acetyltransferase type B catalytic subunit OS=Mus musculus GN=Hat1 PE=1 SV=1	Hat1	2.33338e+06	2.14e+06	2.45808e+06	2.34141e+06	0	0	0	0
Q9CX86	3	2	167.44	Heterogeneous nuclear ribonucleoprotein A0 OS=Mus musculus GN=Hnrnpa0 =1 SV=1	Hnrnpa0	2.3284e+06	2.34848e+06	2.63254e+06	2.34347e+06	2.51245e+08	2.51245e+08	2.69147e+08	1.84306e+08
P32067	3	3	144.27	Lupus La protein homolog OS=Mus musculus GN=Ssb =1 SV=1	Ssb	2.32289e+06	3.02993e+06	2.48134e+06	3.11561e+06	3.31172e+07	3.31172e+07	3.00718e+07	2.65964e+07
Q9Z247	2	2	86.39	ptidyl-prolyl cis-trans isomerase FKBP9 OS=Mus musculus GN=Fkbp9 =1 SV=1	Fkbp9	2.31247e+06	2.31646e+06	2.1352e+06	2.36304e+06	0	0	0	0
Q8BJW6	3	3	198.36	Eukaryotic translation initiation factor 2A OS=Mus musculus GN=Eif2a =1 SV=2	Eif2a	2.3112e+06	3.33246e+06	3.38281e+06	2.63735e+06	6.04865e+06	6.04865e+06	4.83425e+06	7.7692e+06
Q9WVA3	6	6	346.18	Mitotic checkpoint protein BUB3 OS=Mus musculus GN=Bub3 =1 SV=2	Bub3	2.30966e+06	2.32398e+06	2.17055e+06	2.97168e+06	1.47146e+07	1.47146e+07	1.11976e+07	1.30077e+07
Q5XG69	1	1	50.16	Soluble lamin-associated protein of 75 kDa OS=Mus musculus GN=Fam169a PE=1 SV=3	Fam169a	2.30587e+06	2.06144e+06	2.65271e+06	2.10964e+06	443005	443005	446050	428939
Q8BMJ2	1	1	54.05	Leucine--tRNA ligase, cytoplasmic OS=Mus musculus GN=Lars =1 SV=2	Lars	2.30534e+06	1.74305e+06	1.46911e+06	1.05496e+06	353575	353575	328194	270336
Q68FD5	12	12	602.05	Clathrin heavy chain 1 OS=Mus musculus GN=Cltc =1 SV=3	Cltc	2.29514e+06	2.25897e+06	2.23115e+06	2.61353e+06	3.8575e+06	3.8575e+06	3.96978e+06	4.1978e+06
P47753	1	1	78.56	F-actin-capping protein subunit alpha-1 OS=Mus musculus GN=Capza1 PE=1 SV=4	Capza1	2.28866e+06	2.73166e+06	2.64637e+06	2.55609e+06	0	0	0	0
P97807	5	5	272.73	Fumarate hydratase, mitochondrial OS=Mus musculus GN=Fh =1 SV=3	Fh	2.28812e+06	2.24891e+06	2.33414e+06	2.19182e+06	2.73278e+06	2.73278e+06	3.8637e+06	3.8055e+06
Q8VDN2	1	1	52.81	Sodium/potassium-transporting ATPase subunit alpha-1 OS=Mus musculus GN=Atp1a1 PE=1 SV=1	Atp1a1	2.28696e+06	2.1845e+06	2.28917e+06	2.98331e+06	0	0	0	0
Q99JI6	5	5	289.25	Ras-related protein Rap-1b OS=Mus musculus GN=Rap1b =1 SV=2	Rap1b	2.27756e+06	2.26859e+06	2.17985e+06	2.3128e+06	0	0	0	0
Q9D0R2	3	3	150.4	Threonine--tRNA ligase, cytoplasmic OS=Mus musculus GN=Tars PE=1 SV=2	Tars	2.27497e+06	1.96947e+06	2.29918e+06	2.08918e+06	0	0	0	0
Q9CWK8	2	2	122.76	Sorting nexin-2 OS=Mus musculus GN=Snx2 PE=1 SV=2	Snx2	2.26424e+06	2.24345e+06	1.86132e+06	2.40919e+06	0	0	0	0
P60229	10	10	590.51	Eukaryotic translation initiation factor 3 subunit E OS=Mus musculus GN=Eif3e =1 SV=1	Eif3e	2.26222e+06	2.31876e+06	1.9825e+06	2.38149e+06	839098	839098	606773	308462
P28352	3	3	198.66	DNA-(apurinic or apyrimidinic site) lyase OS=Mus musculus GN=Ax1 =1 SV=2	Ax1	2.25236e+06	1.91547e+06	1.90547e+06	1.82372e+06	1.27211e+07	1.27211e+07	1.37481e+07	1.3893e+07
P19096	4	4	293.35	Fatty acid synthase OS=Mus musculus GN=Fasn PE=1 SV=2	Fasn	2.24445e+06	2.2432e+06	1.84166e+06	2.11844e+06	0	0	0	0
Q921F2	2	2	106.55	TAR DNA-binding protein 43 OS=Mus musculus GN=Tardbp =1 SV=1	Tardbp	2.23866e+06	1.2863e+06	2.24189e+06	2.52267e+06	1.1544e+08	1.1544e+08	1.10346e+08	1.02085e+08
Q9QZD9	1	1	47.4	Eukaryotic translation initiation factor 3 subunit I OS=Mus musculus GN=Eif3i PE=1 SV=1	Eif3i	2.23421e+06	2.65908e+06	2.77413e+06	3.00895e+06	292340	292340	302090	286184
Q9DBG6	2	2	235.76	Dolichyl-diphosphooligosaccharide--protein glycosyltransferase subunit 2 OS=Mus musculus GN=Rpn2 =1 SV=1	Rpn2	2.23193e+06	2.07493e+06	3.48811e+06	3.03767e+06	0	0	0	0
P62313	4	4	236.82	U6 snRNA-associated Sm-like protein LSm6 OS=Mus musculus GN=Lsm6 =1 SV=1	Lsm6	2.23082e+06	1.90536e+06	1.86343e+06	1.28133e+06	3.86221e+06	3.86221e+06	4.68248e+06	5.10151e+06
P54276	9	9	522.8	DNA mismatch repair protein Msh6 OS=Mus musculus GN=Msh6 =1 SV=3	Msh6	2.23044e+06	2.46041e+06	1.95943e+06	2.49802e+06	2.10713e+06	2.10713e+06	1.85863e+06	1.52585e+06
Q9Z127	1	1	47.31	Large neutral amino acids transporter small subunit 1 OS=Mus musculus GN=Slc7a5 =1 SV=2	Slc7a5	2.22423e+06	2.23542e+06	2.027e+06	1.92574e+06	1.1297e+06	1.1297e+06	1.33258e+06	1.34192e+06
Q9JIX8	1	1	65.16	Apoptotic chromatin condensation inducer in the nucleus OS=Mus musculus GN=Acin1 PE=1 SV=3	Acin1	2.22043e+06	2.05657e+06	1.60991e+06	1.9141e+06	1.65585e+06	1.65585e+06	1.64444e+06	1.50933e+06
Q9WU28	5	5	311.54	Prefoldin subunit 5 OS=Mus musculus GN=Pfdn5 =1 SV=1	Pfdn5	2.21109e+06	3.34433e+06	2.46775e+06	3.56818e+06	0	0	0	0
Q3TWW8	3	3	193.83	Serine/arginine-rich splicing factor 6 OS=Mus musculus GN=Srsf6 =1 SV=1	Srsf6	2.20325e+06	2.61543e+06	2.35823e+06	2.35073e+06	9.20457e+06	9.20457e+06	8.78102e+06	8.43227e+06
Q8BP47	2	2	132.65	Asparagine--tRNA ligase, cytoplasmic OS=Mus musculus GN=Nars =1 SV=2	Nars	2.20313e+06	1.7539e+06	2.10405e+06	2.08568e+06	0	0	0	0
P36993	1	1	45.33	Protein phosphatase 1B OS=Mus musculus GN=Ppm1b PE=1 SV=1	Ppm1b	2.20152e+06	2.42961e+06	1.79819e+06	2.18035e+06	0	0	0	0
Q9ESU6	4	4	241.41	Bromodomain-containing protein 4 OS=Mus musculus GN=Brd4 =1 SV=2	Brd4	2.20006e+06	2.021e+06	1.91591e+06	2.46998e+06	1.18906e+07	1.18906e+07	1.16622e+07	7.63208e+06
Q6ZWV3	2	2	93.3	60S ribosomal protein L10 OS=Mus musculus GN=Rpl10 PE=1 SV=3	Rpl10	2.18695e+06	2.23809e+06	2.24953e+06	2.42679e+06	816460	816460	1.09351e+06	1.19283e+06
Q9Z1Q9	2	2	131.17	Valine--tRNA ligase OS=Mus musculus GN=Vars PE=1 SV=1	Vars	2.1825e+06	1.99924e+06	2.06133e+06	2.23219e+06	669934	669934	476485	846235
Q8C1A5	2	2	115.16	Thimet oligopeptidase OS=Mus musculus GN=Thop1 PE=1 SV=1	Thop1	2.1773e+06	2.37749e+06	2.38422e+06	2.58928e+06	0	0	0	0
Q9CR29	2	2	96.12	Coiled-coil domain-containing protein 43 OS=Mus musculus GN=Ccdc43 PE=1 SV=1	Ccdc43	2.1626e+06	2.66829e+06	2.09866e+06	2.60906e+06	0	0	0	0
P07607	1	1	58.07	Thymidylate synthase OS=Mus musculus GN=Tyms PE=1 SV=1	Tyms	2.16221e+06	1.98789e+06	1.56693e+06	2.08809e+06	0	0	0	0
Q8BWY3	2	2	168.29	Eukaryotic ptide chain release factor subunit 1 OS=Mus musculus GN=Etf1 =1 SV=4	Etf1	2.15688e+06	1.9185e+06	2.22964e+06	2.08287e+06	949419	949419	1.6265e+06	2.09216e+06
Q8R326	3	3	169.68	Parasckle component 1 OS=Mus musculus GN=Pspc1 =1 SV=1	Pspc1	2.15279e+06	1.39273e+06	2.09024e+06	2.40298e+06	1.82831e+07	1.82831e+07	1.54926e+07	1.87639e+07
Q61035	2	2	128.56	Histidine--tRNA ligase, cytoplasmic OS=Mus musculus GN=Hars PE=1 SV=2	Hars	2.15217e+06	3.81153e+06	2.77065e+06	3.45317e+06	0	0	0	0
P70372	3	3	213.13	ELAV-like protein 1 OS=Mus musculus GN=Elavl1 =1 SV=2	Elavl1	2.14829e+06	1.66734e+06	1.36956e+06	1.83295e+06	6.5564e+07	6.5564e+07	5.90924e+07	7.41135e+07
Q8K003	4	4	183.36	Translation machinery-associated protein 7 OS=Mus musculus GN=Tma7 =3 SV=1	Tma7	2.14688e+06	2.47084e+06	2.43146e+06	2.56477e+06	1.6055e+06	1.6055e+06	1.07808e+06	1.06931e+06
P60766	1	1	47.47	Cell division control protein 42 homolog OS=Mus musculus GN=Cdc42 =1 SV=2	Cdc42	2.14361e+06	2.0739e+06	1.55796e+06	1.94514e+06	0	0	0	0
P47941	4	4	233.36	Crk-like protein OS=Mus musculus GN=Crkl =1 SV=2	Crkl	2.13958e+06	2.19149e+06	2.23641e+06	2.39096e+06	0	0	0	0
Q8C0C7	3	3	236.54	Phenylalanine--tRNA ligase alpha subunit OS=Mus musculus GN=Farsa =1 SV=1	Farsa	2.13745e+06	1.85912e+06	2.23798e+06	2.3621e+06	2.15435e+06	2.15435e+06	2.94751e+06	5.14603e+06
Q9ERS2	3	3	198.1	NADH dehydrogenase [ubiquinone] 1 alpha subcomplex subunit 13 OS=Mus musculus GN=Ndufa13 =1 SV=3	Ndufa13	2.13349e+06	2.44246e+06	2.22004e+06	2.10491e+06	0	0	0	0
P48758	4	4	209.27	Carbonyl reductase [NADPH] 1 OS=Mus musculus GN=Cbr1 PE=1 SV=3	Cbr1	2.12947e+06	2.15423e+06	1.94754e+06	2.2085e+06	0	0	0	0
P97429	3	3	210.7	Annexin A4 OS=Mus musculus GN=Anxa4 PE=1 SV=4	Anxa4	2.12574e+06	1.97958e+06	1.96486e+06	2.19044e+06	0	0	0	0
Q07076	4	4	218.65	Annexin A7 OS=Mus musculus GN=Anxa7 PE=1 SV=2	Anxa7	2.1233e+06	2.28496e+06	2.39008e+06	2.38175e+06	0	0	0	0
Q9CZM2	1	1	47.8	60S ribosomal protein L15 OS=Mus musculus GN=Rpl15 PE=2 SV=4	Rpl15	2.12304e+06	1.62176e+06	1.86979e+06	2.07241e+06	0	0	0	0
Q8R1I1	2	2	89.35	Cytochrome b-c1 complex subunit 9 OS=Mus musculus GN=Uqcr10 =1 SV=1	Uqcr10	2.11087e+06	1.8651e+06	2.47906e+06	2.01495e+06	0	0	0	0
Q91V92	8	8	473.09	ATP-citrate synthase OS=Mus musculus GN=Acly PE=1 SV=1	Acly	2.10919e+06	2.24444e+06	2.33827e+06	2.38658e+06	51835	51835	78783.8	0
Q99KP6	4	4	165.55	Pre-mRNA-processing factor 19 OS=Mus musculus GN=Prpf19 =1 SV=1	Prpf19	2.10783e+06	2.22319e+06	2.36845e+06	2.70707e+06	3.40028e+07	3.40028e+07	2.85113e+07	2.98015e+07
P35486	3	3	161.11	Pyruvate dehydrogenase E1 component subunit alpha, somatic form, mitochondrial OS=Mus musculus GN=Pdha1 PE=1 SV=1	Pdha1	2.10239e+06	1.933e+06	2.19849e+06	2.15493e+06	1.29708e+06	1.29708e+06	1.22252e+06	1.12792e+06
Q6ZPZ3	1	1	41.9	Zinc finger CCCH domain-containing protein 4 OS=Mus musculus GN=Zc3h4 =1 SV=2	Zc3h4	2.10182e+06	2.11648e+06	2.53507e+06	1.87465e+06	0	0	0	0
Q8BPG6	2	2	96.08	Sulfatase-modifying factor 2 OS=Mus musculus GN=Sumf2 PE=1 SV=2	Sumf2	2.09834e+06	1.99827e+06	2.09746e+06	2.50039e+06	0	0	0	0
Q9WV03	3	3	176.55	Protein FAM50A OS=Mus musculus GN=Fam50a =1 SV=1	Fam50a	2.09424e+06	2.01298e+06	1.82924e+06	1.96928e+06	547381	547381	368653	516537
Q9D1M4	1	1	88.64	Eukaryotic translation elongation factor 1 epsilon-1 OS=Mus musculus GN=Eef1e1 =1 SV=1	Eef1e1	2.0938e+06	1.97705e+06	2.20446e+06	2.32986e+06	840002	840002	924977	1.10227e+06
P97377	3	3	143.14	Cyclin-dendent kinase 2 OS=Mus musculus GN=Cdk2 =1 SV=2	Cdk2	2.08779e+06	2.34157e+06	1.9256e+06	2.16044e+06	2.62702e+06	2.62702e+06	2.55788e+06	2.41139e+06
Q8VDM4	2	2	121.4	26S proteasome non-ATPase regulatory subunit 2 OS=Mus musculus GN=Psmd2 PE=1 SV=1	Psmd2	2.06767e+06	1.93023e+06	1.2326e+06	1.94244e+06	0	0	0	0
Q9DAU1	1	1	36.71	Protein canopy homolog 3 OS=Mus musculus GN=Cnpy3 =1 SV=1	Cnpy3	2.06704e+06	2.93897e+06	2.33838e+06	2.48027e+06	0	0	0	0
Q9CQS8	1	1	46.12	Protein transport protein Sec61 subunit beta OS=Mus musculus GN=Sec61b =1 SV=3	Sec61b	2.0658e+06	2.26808e+06	2.15014e+06	3.0407e+06	0	0	0	0
P52760	1	1	66.3	Ribonuclease UK114 OS=Mus musculus GN=Hrsp12 PE=1 SV=3	Hrsp12	2.06383e+06	2.3233e+06	1.63731e+06	2.61668e+06	0	0	0	0
Q9CR86	1	1	45.02	Calcium-regulated heat stable protein 1 OS=Mus musculus GN=Carhsp1 =1 SV=1	Carhsp1	2.05721e+06	1.97627e+06	1.90466e+06	2.42225e+06	0	0	0	0
Q9D6R2	2	2	111.21	Isocitrate dehydrogenase [NAD] subunit alpha, mitochondrial OS=Mus musculus GN=Idh3a PE=1 SV=1	Idh3a	2.05648e+06	2.24478e+06	2.27283e+06	2.53893e+06	492608	492608	1.4739e+06	1.23338e+06
P70195	3	3	257.85	Proteasome subunit beta ty-7 OS=Mus musculus GN=Psmb7 =1 SV=1	Psmb7	2.03942e+06	3.3778e+06	4.88713e+06	4.34925e+06	0	0	0	0
Q9QY93	1	1	39.24	dCTP pyrophosphatase 1 OS=Mus musculus GN=Dctpp1 =1 SV=1	Dctpp1	2.02797e+06	1.53143e+06	1.6293e+06	1.62822e+06	0	0	0	0
P42208	4	4	229.32	Septin-2 OS=Mus musculus GN=Sept2 =1 SV=2	37500	2.02523e+06	1.87086e+06	1.94669e+06	1.78512e+06	0	0	0	0
P11260	1	1	59.64	LINE-1 retrotransposable element ORF1 protein OS=Mus musculus =1 SV=2	1SV	2.02425e+06	1.76813e+06	1.05497e+06	1.32207e+06	4.86451e+06	4.86451e+06	4.786e+06	9.88948e+06
O88487	3	3	134.65	Cytoplasmic dynein 1 intermediate chain 2 OS=Mus musculus GN=Dync1i2 =1 SV=1	Dync1i2	2.01638e+06	2.62756e+06	2.39057e+06	2.69601e+06	0	0	0	0
Q8R1B4	1	1	52.63	Eukaryotic translation initiation factor 3 subunit C OS=Mus musculus GN=Eif3c PE=1 SV=1	Eif3c	2.01016e+06	1.72629e+06	1.81187e+06	1.95596e+06	267717	267717	1.27353e+06	588278
Q91XA2	1	1	43.39	Golgi membrane protein 1 OS=Mus musculus GN=Golm1 =1 SV=2	Golm1	2.00614e+06	1.54136e+06	1.12289e+06	1.57146e+06	0	0	0	0
P62334	4	4	229.83	26S protease regulatory subunit 10B OS=Mus musculus GN=Psmc6 PE=1 SV=1	Psmc6	2.00449e+06	2.12437e+06	2.20176e+06	2.69575e+06	44052	44052	123052	130513
Q8BFQ8	1	1	56.9	Parkinson disease 7 domain-containing protein 1 OS=Mus musculus GN=Pddc1 =1 SV=1	Pddc1	2.00146e+06	1.81576e+06	2.01377e+06	1.68935e+06	0	0	0	0
Q9D967	2	2	84.64	Magnesium-dependent phosphatase 1 OS=Mus musculus GN=Mdp1 PE=1 SV=1	Mdp1	1.99686e+06	1.74531e+06	1.86814e+06	2.524e+06	0	0	0	0
P02468	1	1	62.25	Laminin subunit gamma-1 OS=Mus musculus GN=Lamc1 PE=1 SV=2	Lamc1	1.99464e+06	1.72106e+06	1.82408e+06	1.9273e+06	552371	552371	560703	289002
P70288	1	1	43.71	Histone deacetylase 2 OS=Mus musculus GN=Hdac2 =1 SV=1	Hdac2	1.98947e+06	2.05823e+06	2.40085e+06	2.74569e+06	6.92723e+06	6.92723e+06	6.41201e+06	6.02689e+06
Q8BFR5	2	2	139	Elongation factor Tu, mitochondrial OS=Mus musculus GN=Tufm =1 SV=1	Tufm	1.98942e+06	1.79964e+06	1.92695e+06	1.5664e+06	2.37894e+06	2.37894e+06	2.73316e+06	2.78619e+06
Q8K2K6	1	1	43.47	Arf-GAP domain and FG reat-containing protein 1 OS=Mus musculus GN=Agfg1 =1 SV=2	Agfg1	1.98845e+06	2.28013e+06	2.32268e+06	2.28105e+06	258372	258372	70916.9	356682
Q6ZWN5	1	1	65.38	40S ribosomal protein S9 OS=Mus musculus GN=Rps9 PE=1 SV=3	Rps9	1.9789e+06	2.09234e+06	1.72686e+06	1.85652e+06	952438	952438	789041	791809
P61164	3	3	149.51	Alpha-centractin OS=Mus musculus GN=Actr1a =1 SV=1	Actr1a	1.97427e+06	1.88284e+06	2.13414e+06	1.7157e+06	0	0	0	0
P35279	2	1	98.47	Ras-related protein Rab-6A OS=Mus musculus GN=Rab6a =1 SV=4	Rab6a	1.96128e+06	1.76057e+06	1.6102e+06	2.09663e+06	0	0	0	0
Q64669	1	1	39.26	NAD(P)H dehydrogenase [quinone] 1 OS=Mus musculus GN=Nqo1 PE=1 SV=3	Nqo1	1.93618e+06	2.00795e+06	2.00875e+06	2.19351e+06	0	0	0	0
Q8CCS6	2	2	134.29	Polyadenylate-binding protein 2 OS=Mus musculus GN=Pabpn1 =1 SV=3	Pabpn1	1.93438e+06	1.64028e+06	1.60374e+06	2.12443e+06	2.48336e+07	2.48336e+07	2.79181e+07	4.47161e+07
P47915	3	3	127.43	60S ribosomal protein L29 OS=Mus musculus GN=Rpl29 PE=2 SV=2	Rpl29	1.93075e+06	1.70251e+06	1.69199e+06	1.90924e+06	0	0	0	0
Q80UU9	1	1	66.07	Membrane-associated progesterone receptor component 2 OS=Mus musculus GN=Pgrmc2 =1 SV=2	Pgrmc2	1.92645e+06	1.74192e+06	1.89812e+06	1.8522e+06	0	0	0	0
Q9CQV1	2	2	109.41	Mitochondrial import inner membrane translocase subunit TIM16 OS=Mus musculus GN=Pam16 PE=1 SV=1	Pam16	1.9211e+06	1.88545e+06	1.88273e+06	2.19046e+06	0	0	0	0
Q8CGC7	5	5	284.66	Bifunctional glutamate/proline--tRNA ligase OS=Mus musculus GN=Eprs PE=1 SV=4	Eprs	1.91879e+06	1.90907e+06	1.72099e+06	1.92103e+06	1.56149e+06	1.56149e+06	1.5175e+06	1.01417e+06
Q91VX2	3	3	175.36	Ubiquitin-associated protein 2 OS=Mus musculus GN=Ubap2 =1 SV=1	Ubap2	1.91504e+06	1.7511e+06	1.57982e+06	1.72694e+06	1.07596e+07	1.07596e+07	8.5049e+06	8.27873e+06
O08579	1	1	60.44	Emerin OS=Mus musculus GN=Emd =1 SV=1	Emd	1.90976e+06	1.9638e+06	1.77667e+06	1.84174e+06	1.25054e+06	1.25054e+06	1.22957e+06	1.14242e+06
P56376	2	2	120.39	Acylphosphatase-1 OS=Mus musculus GN=Acyp1 PE=1 SV=2	Acyp1	1.90901e+06	1.39484e+06	3.90711e+06	3.48206e+06	0	0	0	0
Q61753	1	1	45.3	D-3-phosphoglycerate dehydrogenase OS=Mus musculus GN=Phgdh PE=1 SV=3	Phgdh	1.9073e+06	1.94755e+06	2.08911e+06	2.50426e+06	0	0	0	0
P45878	1	1	52.44	Peptidyl-prolyl cis-trans isomerase FKBP2 OS=Mus musculus GN=Fkbp2 PE=1 SV=1	Fkbp2	1.90706e+06	2.03146e+06	2.18352e+06	2.59872e+06	1.40448e+06	1.40448e+06	1.7658e+06	963244
Q9JIF0	2	2	89.85	Protein arginine N-methyltransferase 1 OS=Mus musculus GN=Prmt1 PE=1 SV=1	Prmt1	1.9003e+06	1.88968e+06	1.67259e+06	1.70891e+06	456431	456431	597656	613391
P23116	15	15	786.15	Eukaryotic translation initiation factor 3 subunit A OS=Mus musculus GN=Eif3a =1 SV=5	Eif3a	1.89496e+06	1.98095e+06	2.11361e+06	2.20474e+06	1.32573e+06	1.32573e+06	1.18944e+06	1.21678e+06
Q99KK7	3	3	143.64	Dipeptidyl peptidase 3 OS=Mus musculus GN=Dpp3 PE=1 SV=2	Dpp3	1.89429e+06	1.78857e+06	1.45311e+06	1.70689e+06	0	0	0	0
Q9CPP0	2	2	109.48	Nucleoplasmin-3 OS=Mus musculus GN=Npm3 =1 SV=3	Npm3	1.89078e+06	1.74344e+06	1.4773e+06	1.47196e+06	9.44844e+06	9.44844e+06	9.73901e+06	9.01998e+06
Q69ZQ2	6	6	377.35	Pre-mRNA-splicing factor ISY1 homolog OS=Mus musculus GN=Isy1 =1 SV=2	Isy1	1.88775e+06	1.92721e+06	1.85707e+06	1.83455e+06	2.11797e+06	2.11797e+06	1.93613e+06	1.968e+06
P46935	2	2	87.59	E3 ubiquitin-protein ligase NEDD4 OS=Mus musculus GN=Nedd4 PE=1 SV=3	Nedd4	1.88168e+06	1.70674e+06	1.65348e+06	1.66682e+06	0	0	0	0
Q9CZ04	3	3	224.94	COP9 signalosome complex subunit 7a OS=Mus musculus GN=Cops7a =1 SV=2	Cops7a	1.88002e+06	2.08231e+06	1.87893e+06	1.65077e+06	0	0	0	0
Q9QZE7	1	1	41.42	Translin-associated protein X OS=Mus musculus GN=Tsnax =1 SV=1	Tsnax	1.87871e+06	1.70951e+06	1.79e+06	1.79224e+06	0	0	0	0
Q9ER72	4	4	260.8	Cysteine--tRNA ligase, cytoplasmic OS=Mus musculus GN=Cars PE=1 SV=2	Cars	1.87664e+06	2.17052e+06	1.91105e+06	2.42716e+06	0	0	0	0
Q8R050	1	1	52.29	Eukaryotic ptide chain release factor GTP-binding subunit ERF3A OS=Mus musculus GN=Gspt1 =1 SV=2	Gspt1	1.87137e+06	1.59649e+06	2.02176e+06	1.80068e+06	0	0	0	0
P42125	2	2	98.87	Enoyl-CoA delta isomerase 1, mitochondrial OS=Mus musculus GN=Eci1 =1 SV=2	Eci1	1.87023e+06	1.83901e+06	2.01152e+06	1.6371e+06	1.28534e+06	1.28534e+06	1.25605e+06	7572.75
Q1HFZ0	4	4	216.16	tRNA (cytosine(34)-C(5))-methyltransferase OS=Mus musculus GN=Nsun2 =1 SV=2	Nsun2	1.86353e+06	1.93524e+06	1.66858e+06	1.46655e+06	1.16812e+07	1.16812e+07	1.49096e+07	1.8086e+07
Q91WE2	1	1	39.19	Protein FAM192A OS=Mus musculus GN=Fam192a =1 SV=1	Fam192a	1.86297e+06	1.56734e+06	1.56074e+06	2.00538e+06	0	0	0	0
P46061	4	4	298.23	Ran GTPase-activating protein 1 OS=Mus musculus GN=Rangap1 =1 SV=2	Rangap1	1.86199e+06	1.39536e+06	1.62918e+06	1.46594e+06	2.8678e+06	2.8678e+06	2.4805e+06	1.61757e+06
Q9CRD0	2	2	101.83	OCIA domain-containing protein 1 OS=Mus musculus GN=Ociad1 =1 SV=1	Ociad1	1.85987e+06	1.8266e+06	1.4622e+06	2.42792e+06	0	0	0	0
Q62418	3	3	230.6	Drebrin-like protein OS=Mus musculus GN=Dbnl =1 SV=2	Dbnl	1.85845e+06	1.83869e+06	1.67817e+06	2.25458e+06	0	0	0	0
Q9CR21	1	1	36.35	Acyl carrier protein, mitochondrial OS=Mus musculus GN=Ndufab1 =1 SV=1	Ndufab1	1.85238e+06	2.2115e+06	2.04141e+06	2.82743e+06	216004	216004	182200	190661
P63001	3	3	223.18	Ras-related C3 botulinum toxin substrate 1 OS=Mus musculus GN=Rac1 =1 SV=1	Rac1	1.84126e+06	1.59764e+06	1.44982e+06	1.80353e+06	0	0	0	0
Q9Z0S1	2	2	120.09	3'(2'),5'-bisphosphate nucleotidase 1 OS=Mus musculus GN=Bpnt1 =1 SV=2	Bpnt1	1.83432e+06	1.75713e+06	1.61693e+06	1.84478e+06	0	0	0	0
Q9WUR9	3	3	198.43	Adenylate kinase 4, mitochondrial OS=Mus musculus GN=Ak4 =1 SV=1	Ak4	1.83202e+06	1.95107e+06	1.67164e+06	1.97548e+06	2.2771e+06	2.2771e+06	3.49727e+06	3.16325e+06
P97311	7	7	410.66	DNA replication licensing factor MCM6 OS=Mus musculus GN=Mcm6 =1 SV=1	Mcm6	1.82964e+06	1.81085e+06	1.80132e+06	2.00767e+06	7.86077e+06	7.86077e+06	1.03668e+07	7.56463e+06
Q9R1P3	1	1	47.11	Proteasome subunit beta type-2 OS=Mus musculus GN=Psmb2 PE=1 SV=1	Psmb2	1.81965e+06	1.67452e+06	528889	1.72689e+06	0	0	0	0
Q6NV83	2	2	86.63	U2 snRNP-associated SURP motif-containing protein OS=Mus musculus GN=U2surp =1 SV=3	U2surp	1.81774e+06	2.05099e+06	1.95238e+06	1.99394e+06	8.10616e+06	8.10616e+06	8.02562e+06	8.8955e+06
Q8BJU0	1	1	67.33	Small glutamine-rich tetratricopeptide repeat-containing protein alpha OS=Mus musculus GN=Sgta PE=1 SV=2	Sgta	1.81586e+06	1.78672e+06	1.58707e+06	1.63482e+06	0	0	0	0
Q8VH51	2	2	145.33	RNA-binding protein 39 OS=Mus musculus GN=Rbm39 =1 SV=2	Rbm39	1.81351e+06	1.87555e+06	1.65384e+06	1.55508e+06	1.08311e+07	1.08311e+07	8.56513e+06	9.46611e+06
P20060	4	4	225.63	Beta-hexosaminidase subunit beta OS=Mus musculus GN=Hexb =1 SV=2	Hexb	1.81302e+06	1.79838e+06	1.84744e+06	1.88547e+06	2.97189e+06	2.97189e+06	2.77166e+06	2.35333e+06
Q9D2R6	1	1	71.44	Cytochrome c oxidase assembly factor 3 homolog, mitochondrial OS=Mus musculus GN=Coa3 =1 SV=1	Coa3	1.8116e+06	1.30099e+06	2.56452e+06	2.82003e+06	0	0	0	0
Q9WV80	1	1	46.81	Sorting nexin-1 OS=Mus musculus GN=Snx1 =1 SV=1	Snx1	1.80819e+06	1.94232e+06	1.40683e+06	1.19586e+06	0	0	0	0
Q61699	3	3	197.89	Heat shock protein 105 kDa OS=Mus musculus GN=Hsph1 =1 SV=2	Hsph1	1.80818e+06	1.66164e+06	1.53332e+06	1.92963e+06	2.39582e+06	2.39582e+06	2.17027e+06	2.42006e+06
O09172	1	1	54.08	Glutamate--cysteine ligase regulatory subunit OS=Mus musculus GN=Gclm =1 SV=1	Gclm	1.80701e+06	1.61347e+06	1.72669e+06	1.78145e+06	0	0	0	0
Q9D1R9	3	3	190.88	60S ribosomal protein L34 OS=Mus musculus GN=Rpl34 PE=1 SV=2	Rpl34	1.80534e+06	2.63093e+06	2.99334e+06	2.76429e+06	388595	388595	475259	477880
Q9CPQ1	2	2	115.57	Cytochrome c oxidase subunit 6C OS=Mus musculus GN=Cox6c PE=1 SV=3	Cox6c	1.80519e+06	1.72765e+06	1.63391e+06	1.86787e+06	0	0	0	0
Q80UW8	2	2	96.01	DNA-directed RNA polymerases I, II, and III subunit RPABC1 OS=Mus musculus GN=Polr2e =1 SV=1	Polr2e	1.79944e+06	2.02894e+06	2.09087e+06	2.24879e+06	7.61012e+06	7.61012e+06	8.26842e+06	8.90298e+06
P62267	1	1	54.81	40S ribosomal protein S23 OS=Mus musculus GN=Rps23 PE=1 SV=3	Rps23	1.79879e+06	1.9727e+06	2.52313e+06	2.26502e+06	630497	630497	28675.1	0
P47757	3	3	222.15	F-actin-capping protein subunit beta OS=Mus musculus GN=Capzb PE=1 SV=3	Capzb	1.7971e+06	1.57674e+06	1.44451e+06	1.5585e+06	873237	873237	827130	797473
Q9QYA2	2	2	95.71	Mitochondrial import receptor subunit TOM40 homolog OS=Mus musculus GN=Tomm40 =1 SV=3	Tomm40	1.78693e+06	1.5959e+06	1.84382e+06	2.05056e+06	0	0	0	0
Q7TNE3	1	1	58.14	Sperm-associated antigen 7 OS=Mus musculus GN=Spag7 PE=1 SV=1	Spag7	1.78138e+06	1.95919e+06	1.457e+06	2.16619e+06	0	0	0	0
P97384	2	2	96.76	Annexin A11 OS=Mus musculus GN=Anxa11 PE=1 SV=2	Anxa11	1.78093e+06	1.92469e+06	1.7379e+06	2.22965e+06	0	0	0	0
P00920	3	3	135.24	Carbonic anhydrase 2 OS=Mus musculus GN=Ca2 =1 SV=4	Ca2	1.77727e+06	1.77785e+06	1.87628e+06	2.00792e+06	0	0	0	0
P16045	1	1	125.74	Galectin-1 OS=Mus musculus GN=Lgals1 PE=1 SV=3	Lgals1	1.76424e+06	1.74447e+06	1.4426e+06	1.89903e+06	0	0	0	0
Q99J36	1	1	71.3	THUMP domain-containing protein 1 OS=Mus musculus GN=Thumpd1 PE=1 SV=1	Thumpd1	1.7638e+06	1.96396e+06	1.57608e+06	1.9223e+06	0	0	0	0
Q8JZX4	5	5	214.5	Splicing factor 45 OS=Mus musculus GN=Rbm17 =1 SV=1	Rbm17	1.75585e+06	1.86256e+06	1.5569e+06	1.96377e+06	7.12202e+06	7.12202e+06	7.35639e+06	7.79443e+06
Q6NVF9	1	1	97.67	Cleavage and polyadenylation scificity factor subunit 6 OS=Mus musculus GN=Cpsf6 =1 SV=1	Cpsf6	1.75476e+06	1.62849e+06	1.68372e+06	2.32599e+06	6.13072e+06	6.13072e+06	5.60816e+06	5.81727e+06
Q923D5	4	4	210.29	WW domain-binding protein 11 OS=Mus musculus GN=Wbp11 =1 SV=2	Wbp11	1.75405e+06	1.5448e+06	1.56003e+06	1.65447e+06	2.15543e+06	2.15543e+06	1.37329e+06	2.15602e+06
Q8C1B7	5	4	266.5	Septin-11 OS=Mus musculus GN=Sept11 =1 SV=4	40787	1.75372e+06	1.94504e+06	1.41041e+06	1.80985e+06	0	0	0	0
Q8VBV7	1	1	103.83	COP9 signalosome complex subunit 8 OS=Mus musculus GN=Cops8 PE=1 SV=1	Cops8	1.73591e+06	1.94423e+06	1.67444e+06	2.02482e+06	170781	170781	101462	52455.1
Q8BKC5	4	4	245.98	Importin-5 OS=Mus musculus GN=Ipo5 =1 SV=3	Ipo5	1.7345e+06	1.75595e+06	1.82847e+06	2.1529e+06	0	0	0	0
Q925B0	1	1	65.11	PRKC apoptosis WT1 regulator protein OS=Mus musculus GN=Pawr =1 SV=2	Pawr	1.73242e+06	1.68192e+06	1.39589e+06	1.60912e+06	212208	212208	191294	197449
Q9D8U8	1	1	42.36	Sorting nexin-5 OS=Mus musculus GN=Snx5 PE=1 SV=1	Snx5	1.73153e+06	2.06702e+06	1.84835e+06	1.9521e+06	0	0	0	0
P63005	2	1	104.9	Platelet-activating factor acetylhydrolase IB subunit alpha OS=Mus musculus GN=Pafah1b1 =1 SV=2	Pafah1b1	1.72423e+06	2.69625e+06	1.55192e+06	2.01351e+06	0	0	0	0
Q9CQ80	1	1	113.7	Vacuolar protein-sorting-associated protein 25 OS=Mus musculus GN=Vps25 =1 SV=1	Vps25	1.72188e+06	1.45487e+06	1.74562e+06	1.32039e+06	0	0	0	0
Q8VE37	4	4	199.38	Regulator of chromosome condensation OS=Mus musculus GN=Rcc1 =1 SV=1	Rcc1	1.71729e+06	1.7997e+06	1.92259e+06	2.2107e+06	5.26558e+07	5.26558e+07	4.66511e+07	4.89316e+07
P62082	2	2	73.37	40S ribosomal protein S7 OS=Mus musculus GN=Rps7 =2 SV=1	Rps7	1.7132e+06	1.60019e+06	1.27023e+06	1.20223e+06	2.33181e+07	2.33181e+07	2.704e+07	1.99471e+07
Q9WUM5	4	4	177.98	Succinate--CoA ligase [ADP/GDP-forming] subunit alpha, mitochondrial OS=Mus musculus GN=Suclg1 =1 SV=4	Suclg1	1.71296e+06	1.60818e+06	1.8316e+06	1.60184e+06	3.34215e+06	3.34215e+06	3.82993e+06	3.80934e+06
Q9JIG8	1	1	57.41	PRA1 family protein 2 OS=Mus musculus GN=Praf2 =1 SV=1	Praf2	1.70535e+06	1.70878e+06	1.60168e+06	1.44256e+06	0	0	0	0
Q9R0U0	1	1	49.5	Serine/arginine-rich splicing factor 10 OS=Mus musculus GN=Srsf10 =1 SV=2	Srsf10	1.70494e+06	1.30824e+06	2.07286e+06	1.71344e+06	8.9354e+06	8.9354e+06	1.0316e+07	7.97784e+06
P46471	2	2	96.37	26S protease regulatory subunit 7 OS=Mus musculus GN=Psmc2 PE=1 SV=5	Psmc2	1.70434e+06	2.31e+06	1.83808e+06	1.72316e+06	0	0	0	0
O55131	3	2	136.32	Septin-7 OS=Mus musculus GN=Sept7 =1 SV=1	39326	1.69997e+06	1.79632e+06	1.22023e+06	1.74413e+06	0	0	0	0
Q9D898	1	1	53.82	Actin-related protein 2/3 complex subunit 5-like protein OS=Mus musculus GN=Arpc5l =1 SV=1	Arpc5l	1.699e+06	1.4427e+06	1.44285e+06	1.59426e+06	0	0	0	0
P14901	4	4	193.87	Heme oxygenase 1 OS=Mus musculus GN=Hmox1 =1 SV=1	Hmox1	1.69514e+06	568707	541552	2.02675e+06	1.26492e+06	1.26492e+06	995370	1.04076e+06
P62281	1	1	49.78	40S ribosomal protein S11 OS=Mus musculus GN=Rps11 PE=1 SV=3	Rps11	1.69341e+06	1.33874e+06	1.72367e+06	1.75657e+06	768910	768910	819683	1.16488e+06
P54923	3	3	141.36	[Protein ADP-ribosylarginine] hydrolase OS=Mus musculus GN=Adprh =1 SV=1	Adprh	1.68338e+06	1.60136e+06	1.43999e+06	1.44411e+06	0	0	0	0
Q9D824	1	1	41.91	Pre-mRNA 3'-end-processing factor FIP1 OS=Mus musculus GN=Fip1l1 =1 SV=1	Fip1l1	1.67839e+06	2.00606e+06	1.80715e+06	1.89388e+06	3.17104e+06	3.17104e+06	3.19014e+06	4.255e+06
P23591	2	2	79.08	GDP-L-fucose synthase OS=Mus musculus GN=Tsta3 PE=1 SV=3	Tsta3	1.67479e+06	1.87099e+06	1.35609e+06	1.85073e+06	0	0	0	0
Q91VC9	1	1	69.68	Growth hormone-inducible transmembrane protein OS=Mus musculus GN=Ghitm =1 SV=1	Ghitm	1.67264e+06	1.47987e+06	1.17904e+06	1.28684e+06	0	0	0	0
P32921	2	2	92.27	Tryptophan--tRNA ligase, cytoplasmic OS=Mus musculus GN=Wars =1 SV=2	Wars	1.66574e+06	1.37089e+06	1.28432e+06	1.61833e+06	0	0	0	0
Q9D1M0	1	1	57.51	Protein SEC13 homolog OS=Mus musculus GN=Sec13 =1 SV=3	Sec13	1.6617e+06	1.4218e+06	1.3512e+06	1.62589e+06	0	0	0	0
Q9D1K2	1	1	47.25	V-ty proton ATPase subunit F OS=Mus musculus GN=Atp6v1f =1 SV=2	Atp6v1f	1.66048e+06	2.33291e+06	1.73671e+06	1.89013e+06	0	0	0	0
O09130	1	1	41.61	NFATC2-interacting protein OS=Mus musculus GN=Nfatc2ip =1 SV=1	Nfatc2ip	1.65482e+06	1.88735e+06	1.65975e+06	2.12852e+06	15676.3	15676.3	0	800531
Q8BP40	3	3	178.27	Lysophosphatidic acid phosphatase ty 6 OS=Mus musculus GN=Acp6 =1 SV=1	Acp6	1.64329e+06	1.73213e+06	1.80452e+06	1.78405e+06	2.66083e+06	2.66083e+06	2.21262e+06	2.67702e+06
P62192	1	1	76.32	26S protease regulatory subunit 4 OS=Mus musculus GN=Psmc1 PE=1 SV=1	Psmc1	1.64262e+06	1.75848e+06	1.69134e+06	1.83059e+06	0	0	0	0
Q6PDQ2	3	3	130.74	Chromodomain-helicase-DNA-binding protein 4 OS=Mus musculus GN=Chd4 =1 SV=1	Chd4	1.6392e+06	2.0612e+06	1.33846e+06	1.98137e+06	2.04606e+07	2.04606e+07	1.92907e+07	1.82247e+07
Q60595	3	3	150.33	X-linked lymphocyte-regulated protein 3A OS=Mus musculus GN=Xlr3a =1 SV=1	Xlr3a	1.63347e+06	1.46691e+06	1.61393e+06	1.71351e+06	0	0	0	0
Q8K1Z0	1	1	32.91	Ubiquinone biosynthesis protein COQ9, mitochondrial OS=Mus musculus GN=Coq9 =1 SV=1	Coq9	1.62902e+06	1.53681e+06	1.72432e+06	2.09278e+06	137855	137855	132444	85141.7
Q64737	6	6	308.12	Trifunctional purine biosynthetic protein adenosine-3 OS=Mus musculus GN=Gart PE=1 SV=3	Gart	1.62707e+06	1.1017e+06	1.40639e+06	1.96012e+06	0	0	0	0
Q9DBR7	6	6	289.74	Protein phosphatase 1 regulatory subunit 12A OS=Mus musculus GN=Ppp1r12a =1 SV=2	Ppp1r12a	1.62304e+06	1.60041e+06	1.16539e+06	1.69239e+06	522342	522342	419483	403447
O55201	3	3	142.18	Transcription elongation factor SPT5 OS=Mus musculus GN=Supt5h =1 SV=1	Supt5h	1.62146e+06	1.65949e+06	1.81169e+06	2.14838e+06	734783	734783	936266	955016
P62077	2	2	160.24	Mitochondrial import inner membrane translocase subunit Tim8 B OS=Mus musculus GN=Timm8b =1 SV=1	Timm8b	1.61777e+06	1.67403e+06	1.60835e+06	1.76482e+06	2.54532e+06	2.54532e+06	2.09505e+06	2.85087e+06
Q61656	5	5	303.71	Probable ATP-dendent RNA helicase DDX5 OS=Mus musculus GN=Ddx5 =1 SV=2	Ddx5	1.61651e+06	1.61727e+06	1.32074e+06	1.92858e+06	2.97643e+07	2.97643e+07	2.70265e+07	2.70921e+07
Q0VGB7	2	2	86.15	Serine/threonine-protein phosphatase 4 regulatory subunit 2 OS=Mus musculus GN=Ppp4r2 =1 SV=1	Ppp4r2	1.61641e+06	1.59688e+06	1.26442e+06	1.33019e+06	0	0	0	0
Q9D706	1	1	45.53	RNA polymerase II-associated protein 3 OS=Mus musculus GN=Rpap3 =1 SV=1	Rpap3	1.61588e+06	1.25611e+06	1.34377e+06	1.74833e+06	0	0	0	0
Q99KE1	4	4	193.66	NAD-dendent malic enzyme, mitochondrial OS=Mus musculus GN=Me2 =1 SV=1	Me2	1.61574e+06	2.11813e+06	1.60787e+06	1.77192e+06	287164	287164	584164	750386
O08585	3	3	169.36	Clathrin light chain A OS=Mus musculus GN=Clta =1 SV=2	Clta	1.61555e+06	1.62971e+06	1.42902e+06	1.84572e+06	239895	239895	184656	245322
Q9CS42	2	2	183.97	Ribose-phosphate pyrophosphokinase 2 OS=Mus musculus GN=Prps2 =1 SV=4	Prps2	1.61509e+06	1.70609e+06	1.77985e+06	2.33953e+06	0	0	0	0
Q8BYK6	2	2	106.65	YTH domain-containing family protein 3 OS=Mus musculus GN=Ythdf3 =1 SV=2	Ythdf3	1.6108e+06	1.84161e+06	1.72293e+06	2.04626e+06	982481	982481	1.07865e+06	1.13034e+06
Q9JM76	2	2	127.89	Actin-related protein 2/3 complex subunit 3 OS=Mus musculus GN=Arpc3 =1 SV=3	Arpc3	1.60097e+06	1.42527e+06	1.96693e+06	1.73373e+06	536611	536611	540065	573381
Q91V41	1	1	47.05	Ras-related protein Rab-14 OS=Mus musculus GN=Rab14 =1 SV=3	Rab14	1.60086e+06	1.24504e+06	1.69708e+06	1.70251e+06	708274	708274	672812	802144
Q9CYI4	1	1	47.28	Putative RNA-binding protein Luc7-like 1 OS=Mus musculus GN=Luc7l PE=1 SV=2	Luc7l	1.60045e+06	1.38466e+06	1.56562e+06	1.51262e+06	1.40694e+06	1.40694e+06	1.09978e+06	1.16444e+06
Q921Y2	1	1	49.39	U3 small nucleolar ribonucleoprotein protein IMP3 OS=Mus musculus GN=Imp3 =2 SV=1	Imp3	1.59978e+06	1.63517e+06	1.35611e+06	1.61832e+06	0	0	0	0
O88342	3	3	143.07	WD reat-containing protein 1 OS=Mus musculus GN=Wdr1 =1 SV=3	Wdr1	1.59938e+06	1.83036e+06	1.41804e+06	1.94649e+06	2.67845e+06	2.67845e+06	2.45505e+06	1.86993e+06
Q9Z1F9	2	2	96.81	SUMO-activating enzyme subunit 2 OS=Mus musculus GN=Uba2 PE=1 SV=1	Uba2	1.59498e+06	1.74842e+06	1.75525e+06	1.99957e+06	0	0	0	0
Q9CYA0	1	1	70.87	Cysteine-rich with EGF-like domain protein 2 OS=Mus musculus GN=Creld2 PE=1 SV=1	Creld2	1.58477e+06	1.85071e+06	1.68364e+06	2.14011e+06	512692	512692	699688	255633
Q8K411	3	3	136.21	Presequence protease, mitochondrial OS=Mus musculus GN=Pitrm1 =1 SV=1	Pitrm1	1.58463e+06	1.42502e+06	1.25088e+06	1.49867e+06	192909	192909	208822	1.38423e+06
P17665	1	1	40.79	Cytochrome c oxidase subunit 7C, mitochondrial OS=Mus musculus GN=Cox7c =1 SV=1	Cox7c	1.578e+06	1.38673e+06	1.3506e+06	1.40915e+06	0	0	0	0
Q9WUA3	4	4	182.91	ATP-dendent 6-phosphofructokinase, platelet ty OS=Mus musculus GN=Pfkp =1 SV=1	Pfkp	1.5721e+06	1.55084e+06	1.50164e+06	1.6271e+06	0	0	0	0
Q66JS6	2	2	151.64	Eukaryotic translation initiation factor 3 subunit J-B OS=Mus musculus GN=Eif3j2 =1 SV=1	Eif3j2	1.57004e+06	1.75434e+06	1.69299e+06	2.1117e+06	0	0	0	0
Q3TC93	5	5	306.12	HCLS1-binding protein 3 OS=Mus musculus GN=Hs1bp3 =1 SV=2	Hs1bp3	1.56642e+06	1.58854e+06	1.75904e+06	1.54775e+06	0	0	0	0
Q62193	2	2	115.54	Replication protein A 32 kDa subunit OS=Mus musculus GN=Rpa2 =1 SV=1	Rpa2	1.56501e+06	1.71831e+06	1.59818e+06	1.69765e+06	5.12403e+06	5.12403e+06	4.83475e+06	5.22518e+06
Q9JIX0	1	1	40.48	Transcription and mRNA export factor ENY2 OS=Mus musculus GN=Eny2 =1 SV=1	Eny2	1.56057e+06	1.35884e+06	1.32127e+06	1.40484e+06	1.27309e+06	1.27309e+06	1.34123e+06	5.94758e+06
Q922B2	1	1	51.41	Aspartate--tRNA ligase, cytoplasmic OS=Mus musculus GN=Dars PE=1 SV=2	Dars	1.55702e+06	1.6571e+06	1.24899e+06	1.46627e+06	1.15742e+06	1.15742e+06	1.00868e+06	805708
Q62280	1	1	40.83	Protein SSXT OS=Mus musculus GN=Ss18 =2 SV=2	Ss18	1.55519e+06	1.19488e+06	1.0946e+06	1.1212e+06	4.13105e+06	4.13105e+06	4.08485e+06	4.3809e+06
Q9ERK4	4	3	195.79	Exportin-2 OS=Mus musculus GN=Cse1l =1 SV=1	Cse1l	1.55429e+06	1.72167e+06	1.85652e+06	2.1207e+06	473523	473523	652733	776911
Q61545	1	1	46.5	RNA-binding protein EWS OS=Mus musculus GN=Ewsr1 =1 SV=2	Ewsr1	1.55068e+06	1.45236e+06	1.37624e+06	1.3494e+06	1.4559e+07	1.4559e+07	1.33626e+07	1.43552e+07
Q9JLV1	6	5	300.26	BAG family molecular charone regulator 3 OS=Mus musculus GN=Bag3 =1 SV=2	Bag3	1.54567e+06	1.62531e+06	1.26478e+06	1.4778e+06	1870.33	1870.33	59675.9	48045.5
O08547	2	2	181.92	Vesicle-trafficking protein SEC22b OS=Mus musculus GN=Sec22b =1 SV=3	Sec22b	1.54211e+06	1.24267e+06	1.78486e+06	1.45189e+06	537029	537029	408173	694771
Q07417	3	3	214.39	Short-chain scific acyl-CoA dehydrogenase, mitochondrial OS=Mus musculus GN=Acads =1 SV=2	Acads	1.53876e+06	1.58493e+06	1.88454e+06	1.8253e+06	2.66857e+06	2.66857e+06	2.60929e+06	2.556e+06
Q5SUR0	7	7	425.25	Phosphoribosylformylglycinamidine synthase OS=Mus musculus GN=Pfas PE=1 SV=1	Pfas	1.52953e+06	1.70898e+06	1.56388e+06	1.84201e+06	0	0	0	0
Q922Y1	2	2	97.08	UBX domain-containing protein 1 OS=Mus musculus GN=Ubxn1 PE=1 SV=1	Ubxn1	1.52441e+06	1.20235e+06	1.74389e+06	1.99706e+06	0	0	0	0
P99029	2	2	127.66	roxiredoxin-5, mitochondrial OS=Mus musculus GN=Prdx5 =1 SV=2	Prdx5	1.52285e+06	1.41634e+06	1.36688e+06	1.3511e+06	188046	188046	248085	136293
Q99ME9	2	2	125.15	Nucleolar GTP-binding protein 1 OS=Mus musculus GN=Gtpbp4 =1 SV=3	Gtpbp4	1.52128e+06	2.11467e+06	1.66483e+06	1.74268e+06	0	0	0	0
Q7TPM1	1	1	48.53	Protein PRRC2B OS=Mus musculus GN=Prrc2b =1 SV=1	Prrc2b	1.51528e+06	1.54214e+06	1.96952e+06	1.57518e+06	0	0	0	0
Q9WUD1	1	1	41.28	STIP1 homology and U box-containing protein 1 OS=Mus musculus GN=Stub1 =1 SV=1	Stub1	1.51318e+06	1.19249e+06	1.31983e+06	1.52889e+06	0	0	0	0
Q9DB34	1	1	61.89	Charged multivesicular body protein 2a OS=Mus musculus GN=Chmp2a =1 SV=1	Chmp2a	1.51108e+06	949306	1.64966e+06	1.68362e+06	0	0	0	0
Q9DCD0	3	3	195.61	6-phosphogluconate dehydrogenase, decarboxylating OS=Mus musculus GN=Pgd PE=1 SV=3	Pgd	1.50992e+06	1.47375e+06	1.72439e+06	1.81334e+06	0	0	0	0
Q9CQH7	2	2	109.04	Transcription factor BTF3 homolog 4 OS=Mus musculus GN=Btf3l4 =1 SV=1	Btf3l4	1.50625e+06	1.67129e+06	1.48846e+06	1.89879e+06	2.60265e+06	2.60265e+06	1.85524e+06	2.75878e+06
Q91VJ5	1	1	41.69	Polyglutamine-binding protein 1 OS=Mus musculus GN=Pqbp1 PE=1 SV=1	Pqbp1	1.50464e+06	1.77924e+06	1.23814e+06	1.44931e+06	1.68039e+06	1.68039e+06	939996	950282
Q8R3G1	2	2	132.08	Nuclear inhibitor of protein phosphatase 1 OS=Mus musculus GN=Ppp1r8 =1 SV=1	Ppp1r8	1.50262e+06	1.60835e+06	2.01533e+06	1.8829e+06	5.98611e+06	5.98611e+06	5.16534e+06	3.40886e+06
Q8K0V4	1	1	91.68	CCR4-NOT transcription complex subunit 3 OS=Mus musculus GN=Cnot3 =1 SV=1	Cnot3	1.49993e+06	1.63938e+06	1.41882e+06	1.58024e+06	3.93624e+06	3.93624e+06	1.33129e+06	1.06448e+06
P47877	3	3	163.37	Insulin-like growth factor-binding protein 2 OS=Mus musculus GN=Igfbp2 =2 SV=2	Igfbp2	1.49904e+06	1.4574e+06	1.56759e+06	1.59997e+06	0	0	0	0
Q6NZB0	2	2	126.78	DnaJ homolog subfamily C member 8 OS=Mus musculus GN=Dnajc8 =1 SV=2	Dnajc8	1.49415e+06	1.45666e+06	1.46745e+06	1.28781e+06	8.81757e+06	8.81757e+06	8.12385e+06	4.86868e+06
Q08943	2	2	111.69	FACT complex subunit SSRP1 OS=Mus musculus GN=Ssrp1 =1 SV=2	Ssrp1	1.49349e+06	1.32479e+06	1.56012e+06	1.50478e+06	9.96788e+06	9.96788e+06	9.77261e+06	1.05078e+07
Q60631	3	3	279.05	Growth factor receptor-bound protein 2 OS=Mus musculus GN=Grb2 =1 SV=1	Grb2	1.4853e+06	1.37679e+06	1.68378e+06	1.62837e+06	120833	120833	86417.2	164416
Q8K3X4	1	1	104.31	Interferon regulatory factor 2-binding protein-like OS=Mus musculus GN=Irf2bpl =1 SV=1	Irf2bpl	1.48504e+06	1.62152e+06	1.84276e+06	1.82975e+06	2.7409e+06	2.7409e+06	2.45637e+06	1.09639e+06
Q91Z53	2	2	87.73	Glyoxylate reductase/hydroxypyruvate reductase OS=Mus musculus GN=Grhpr PE=1 SV=1	Grhpr	1.48493e+06	1.70717e+06	1.43473e+06	1.49769e+06	0	0	0	0
Q80U93	3	3	209.16	Nuclear pore complex protein Nup214 OS=Mus musculus GN=Nup214 =1 SV=2	Nup214	1.48079e+06	1.22806e+06	1.08663e+06	940748	1.73287e+06	1.73287e+06	1.53572e+06	1.63355e+06
Q9CX00	1	1	38.67	IST1 homolog OS=Mus musculus GN=Ist1 =1 SV=1	Ist1	1.476e+06	1.40555e+06	1.14688e+06	1.29485e+06	188086	188086	184091	149008
Q99MR6	7	7	305.85	Serrate RNA effector molecule homolog OS=Mus musculus GN=Srrt =1 SV=1	Srrt	1.47087e+06	1.31672e+06	1.41969e+06	1.49915e+06	1.08199e+07	1.08199e+07	9.97048e+06	1.17333e+07
P21619	5	5	267.23	Lamin-B2 OS=Mus musculus GN=Lmnb2 =1 SV=2	Lmnb2	1.46925e+06	1.73597e+06	1.74138e+06	1.81407e+06	0	0	0	0
P13439	1	1	50.28	Uridine 5'-monophosphate synthase OS=Mus musculus GN=Umps PE=1 SV=3	Umps	1.46418e+06	1.72617e+06	1.82683e+06	1.71586e+06	0	0	0	0
Q5SUC9	1	1	115.32	Protein SCO1 homolog, mitochondrial OS=Mus musculus GN=Sco1 =1 SV=1	Sco1	1.46391e+06	1.96786e+06	1.64537e+06	2.67019e+06	0	0	0	0
Q99K51	1	1	41.98	Plastin-3 OS=Mus musculus GN=Pls3 =1 SV=3	Pls3	1.46353e+06	1.67445e+06	1.39378e+06	1.33237e+06	0	0	0	0
Q8VE70	2	2	115.06	Programmed cell death protein 10 OS=Mus musculus GN=Pdcd10 =1 SV=1	Pdcd10	1.4619e+06	1.71641e+06	2.00599e+06	1.94304e+06	0	0	0	0
Q9CQM9	1	1	43.67	Glutaredoxin-3 OS=Mus musculus GN=Glrx3 =1 SV=1	Glrx3	1.4514e+06	1.5482e+06	1.59387e+06	1.80384e+06	0	0	0	0
Q9JHJ0	3	3	145.66	Tropomodulin-3 OS=Mus musculus GN=Tmod3 =1 SV=1	Tmod3	1.44662e+06	1.4457e+06	1.35897e+06	1.57121e+06	1.76842e+06	1.76842e+06	1.47588e+06	1.68147e+06
P23475	7	6	351.98	X-ray repair cross-complementing protein 6 OS=Mus musculus GN=Xrcc6 =1 SV=5	Xrcc6	1.43895e+06	1.48754e+06	1.38421e+06	1.65013e+06	1.02044e+06	1.02044e+06	821205	778475
Q7TMK9	3	3	165.76	Heterogeneous nuclear ribonucleoprotein Q OS=Mus musculus GN=Syncrip =1 SV=2	Syncrip	1.43719e+06	1.24041e+06	1.14942e+06	1.29443e+06	5.51508e+07	5.51508e+07	5.84353e+07	3.71594e+07
Q8BJ71	5	5	262.24	Nuclear pore complex protein Nup93 OS=Mus musculus GN=Nup93 =1 SV=1	Nup93	1.43479e+06	1.25249e+06	1.76832e+06	1.75874e+06	1.89628e+06	1.89628e+06	1.79345e+06	1.98194e+06
Q7TNG5	2	2	94.5	Echinoderm microtubule-associated protein-like 2 OS=Mus musculus GN=Eml2 PE=1 SV=1	Eml2	1.41873e+06	1.63184e+06	1.39749e+06	1.41762e+06	0	0	0	0
Q80X90	4	4	220.21	Filamin-B OS=Mus musculus GN=Flnb =1 SV=3	Flnb	1.40845e+06	1.3952e+06	1.27742e+06	1.4103e+06	117332	117332	158416	117926
Q99K48	3	3	209.05	Non-POU domain-containing octamer-binding protein OS=Mus musculus GN=Nono =1 SV=3	Nono	1.40515e+06	1.60622e+06	1.64515e+06	1.56151e+06	1.16793e+08	1.16793e+08	1.14553e+08	1.3598e+08
P53994	5	5	297.02	Ras-related protein Rab-2A OS=Mus musculus GN=Rab2a =1 SV=1	Rab2a	1.40472e+06	1.23629e+06	1.43139e+06	1.81719e+06	797276	797276	928154	998822
P47199	2	2	82.73	Quinone oxidoreductase OS=Mus musculus GN=Cryz =1 SV=1	Cryz	1.40321e+06	1.39106e+06	1.62441e+06	1.73066e+06	0	0	0	0
O35459	3	3	153.4	Delta(3,5)-Delta(2,4)-dienoyl-CoA isomerase, mitochondrial OS=Mus musculus GN=Ech1 =1 SV=1	Ech1	1.40053e+06	1.65094e+06	1.40374e+06	1.70306e+06	274565	274565	376691	51096.3
Q11136	2	2	86.46	Xaa-Pro diptidase OS=Mus musculus GN=pd =1 SV=3	pd	1.39744e+06	1.16816e+06	1.36475e+06	1.30505e+06	0	0	0	0
P97300	1	1	59.73	Neuroplastin OS=Mus musculus GN=Nptn =1 SV=3	Nptn	1.39454e+06	1.47949e+06	1.64953e+06	1.81358e+06	0	0	0	0
Q60597	1	1	53.36	2-oxoglutarate dehydrogenase, mitochondrial OS=Mus musculus GN=Ogdh PE=1 SV=3	Ogdh	1.38938e+06	1.24515e+06	1.23258e+06	1.44454e+06	721194	721194	532307	560656
Q8BFY9	1	1	75.11	Transportin-1 OS=Mus musculus GN=Tnpo1 PE=1 SV=2	Tnpo1	1.38889e+06	1.36275e+06	1.09147e+06	1.20361e+06	1.31947e+06	1.31947e+06	1.04623e+06	1.09817e+06
P14576	4	4	184.19	Signal recognition particle 54 kDa protein OS=Mus musculus GN=Srp54 =1 SV=2	Srp54	1.38879e+06	1.47792e+06	1.55888e+06	1.64205e+06	601657	601657	1.0306e+06	1.25166e+06
O35593	1	1	46.36	26S proteasome non-ATPase regulatory subunit 14 OS=Mus musculus GN=Psmd14 PE=1 SV=2	Psmd14	1.3875e+06	1.14048e+06	1.14843e+06	1.31644e+06	0	0	0	0
Q3UPL0	1	1	42.42	Protein transport protein Sec31A OS=Mus musculus GN=Sec31a =1 SV=2	Sec31a	1.38553e+06	1.76444e+06	1.62124e+06	1.5833e+06	0	0	0	0
Q9Z0N1	5	5	292.18	Eukaryotic translation initiation factor 2 subunit 3, X-linked OS=Mus musculus GN=Eif2s3x =1 SV=2	Eif2s3x	1.38323e+06	1.17617e+06	1.71205e+06	1.80159e+06	3.01834e+07	3.01834e+07	2.15884e+07	2.84147e+07
P70444	2	2	125.39	BH3-interacting domain death agonist OS=Mus musculus GN=Bid =1 SV=2	Bid	1.38319e+06	1.58422e+06	832721	1.19083e+06	0	0	0	0
Q61550	2	2	102.56	Double-strand-break repair protein rad21 homolog OS=Mus musculus GN=Rad21 =1 SV=3	Rad21	1.38153e+06	1.3774e+06	1.44565e+06	1.41035e+06	5.79294e+06	5.79294e+06	5.5885e+06	6.01733e+06
P39749	2	2	86.13	Flap endonuclease 1 OS=Mus musculus GN=Fen1 =1 SV=1	Fen1	1.38095e+06	1.3796e+06	1.51614e+06	510666	4.94257e+06	4.94257e+06	5.18793e+06	5.14177e+06
Q9CX56	1	1	33.48	26S proteasome non-ATPase regulatory subunit 8 OS=Mus musculus GN=Psmd8 =1 SV=2	Psmd8	1.37668e+06	1.34427e+06	1.37579e+06	1.95352e+06	0	0	0	0
O70493	3	3	131.37	Sorting nexin-12 OS=Mus musculus GN=Snx12 =1 SV=1	Snx12	1.37348e+06	1.21835e+06	1.13148e+06	1.30255e+06	0	0	0	0
P49718	4	4	207.98	DNA replication licensing factor MCM5 OS=Mus musculus GN=Mcm5 =1 SV=1	Mcm5	1.37127e+06	1.38019e+06	1.33847e+06	1.72308e+06	1.65851e+07	1.65851e+07	1.67701e+07	1.62079e+07
P14685	1	1	45.31	26S proteasome non-ATPase regulatory subunit 3 OS=Mus musculus GN=Psmd3 PE=1 SV=3	Psmd3	1.36624e+06	1.40922e+06	1.37536e+06	1.60743e+06	0	0	0	0
Q9JKX4	2	2	115.87	Protein AATF OS=Mus musculus GN=Aatf =1 SV=1	Aatf	1.36018e+06	1.51634e+06	1.2862e+06	1.6545e+06	0	0	0	0
P46938	1	1	45.48	Transcriptional coactivator YAP1 OS=Mus musculus GN=Yap1 PE=1 SV=2	Yap1	1.35707e+06	1.4392e+06	1.37253e+06	1.45292e+06	787987	787987	400516	326709
Q9JKX6	2	2	84.03	ADP-sugar pyrophosphatase OS=Mus musculus GN=Nudt5 PE=1 SV=1	Nudt5	1.35301e+06	1.53537e+06	1.29687e+06	1.62773e+06	0	0	0	0
P85094	1	1	37.5	Isochorismatase domain-containing protein 2A OS=Mus musculus GN=Isoc2a =1 SV=1	Isoc2a	1.34971e+06	1.3451e+06	1.30722e+06	1.14764e+06	417295	417295	348200	417179
Q9CQ69	3	3	158.39	Cytochrome b-c1 complex subunit 8 OS=Mus musculus GN=Uqcrq =1 SV=3	Uqcrq	1.34774e+06	1.29288e+06	1.49231e+06	1.36705e+06	0	0	0	0
Q6PR54	4	4	268.49	Telomere-associated protein RIF1 OS=Mus musculus GN=Rif1 =1 SV=2	Rif1	1.34694e+06	1.76169e+06	1.42375e+06	1.86899e+06	1.32803e+07	1.32803e+07	1.4847e+07	1.35193e+07
Q9CPW4	1	1	48.76	Actin-related protein 2/3 complex subunit 5 OS=Mus musculus GN=Arpc5 PE=1 SV=3	Arpc5	1.33876e+06	1.58587e+06	1.67057e+06	1.95732e+06	229316	229316	288911	75146.4
P16546	16	15	981.83	Sctrin alpha chain, non-erythrocytic 1 OS=Mus musculus GN=Sptan1 =1 SV=4	Sptan1	1.33818e+06	1.65726e+06	1.02171e+06	1.3684e+06	2.58363e+07	2.58363e+07	2.75784e+07	3.08347e+07
Q8BGS0	1	1	70.18	Protein MAK16 homolog OS=Mus musculus GN=Mak16 =1 SV=1	Mak16	1.33406e+06	1.00161e+06	651394	1.22871e+06	0	0	0	0
Q9QZ06	1	1	51.36	Toll-interacting protein OS=Mus musculus GN=Tollip PE=1 SV=1	Tollip	1.32752e+06	1.23704e+06	1.09545e+06	1.34667e+06	0	0	0	0
P06801	1	1	59.14	NADP-dendent malic enzyme OS=Mus musculus GN=Me1 =1 SV=2	Me1	1.32742e+06	1.26114e+06	1.32208e+06	1.3216e+06	0	0	0	0
P62911	5	5	255.28	60S ribosomal protein L32 OS=Mus musculus GN=Rpl32 PE=1 SV=2	Rpl32	1.32575e+06	2.00485e+06	1.61154e+06	1.8289e+06	0	0	0	0
Q505F5	2	2	104.91	Leucine-rich reat-containing protein 47 OS=Mus musculus GN=Lrrc47 =1 SV=1	Lrrc47	1.32529e+06	1.20698e+06	1.08771e+06	1.18265e+06	368218	368218	560817	143264
Q7TNC4	1	1	62.76	Putative RNA-binding protein Luc7-like 2 OS=Mus musculus GN=Luc7l2 =1 SV=1	Luc7l2	1.32495e+06	1.5017e+06	1.67701e+06	1.95753e+06	989756	989756	1.20011e+06	752757
Q9CRB2	3	3	161.44	H/ACA ribonucleoprotein complex subunit 2 OS=Mus musculus GN=Nhp2 PE=1 SV=1	Nhp2	1.32381e+06	1.11348e+06	1.01165e+06	1.20702e+06	807376	807376	916645	805557
P23506	2	2	172.45	Protein-L-isoaspartate(D-aspartate) O-methyltransferase OS=Mus musculus GN=Pcmt1 =1 SV=3	Pcmt1	1.31647e+06	1.4462e+06	1.34974e+06	1.99604e+06	0	0	0	0
P21126	1	1	44.59	Ubiquitin-like protein 4A OS=Mus musculus GN=Ubl4a PE=1 SV=1	Ubl4a	1.31412e+06	1.54448e+06	1.35947e+06	1.49044e+06	0	0	0	0
Q9D8T7	1	1	83.51	SRA stem-loop-interacting RNA-binding protein, mitochondrial OS=Mus musculus GN=Slirp =1 SV=2	Slirp	1.31124e+06	1.22403e+06	1.13151e+06	1.03053e+06	4.09138e+06	4.09138e+06	3.96797e+06	236209
Q9CPN8	4	4	195.34	Insulin-like growth factor 2 mRNA-binding protein 3 OS=Mus musculus GN=Igf2bp3 =1 SV=1	Igf2bp3	1.30229e+06	1.3252e+06	934226	1.08306e+06	1.92171e+07	1.92171e+07	2.27124e+07	2.4118e+07
Q9JKB3	2	2	84.29	Y-box-binding protein 3 OS=Mus musculus GN=Ybx3 =1 SV=2	Ybx3	1.30215e+06	1.2428e+06	1.10243e+06	1.32608e+06	1.9032e+07	1.9032e+07	1.98411e+07	1.68584e+07
P63168	2	2	160.99	Dynein light chain 1, cytoplasmic OS=Mus musculus GN=Dynll1 =1 SV=1	Dynll1	1.3012e+06	1.62979e+06	1.56001e+06	1.6047e+06	3.4126e+06	3.4126e+06	2.39011e+06	4.22895e+06
Q6PFD9	3	3	190.74	Nuclear pore complex protein Nup98-Nup96 OS=Mus musculus GN=Nup98 =1 SV=2	Nup98	1.29998e+06	1.69612e+06	1.26543e+06	1.49641e+06	3.40671e+06	3.40671e+06	2.85743e+06	2.81728e+06
Q9D8W5	4	4	207.24	26S proteasome non-ATPase regulatory subunit 12 OS=Mus musculus GN=Psmd12 =1 SV=4	Psmd12	1.29407e+06	1.18546e+06	1.25273e+06	1.09679e+06	0	0	0	0
Q9D0F3	1	1	83.28	Protein ERGIC-53 OS=Mus musculus GN=Lman1 =1 SV=1	Lman1	1.29405e+06	1.54951e+06	1.06093e+06	1.98908e+06	0	0	0	0
O35465	1	1	73.23	ptidyl-prolyl cis-trans isomerase FKBP8 OS=Mus musculus GN=Fkbp8 =1 SV=2	Fkbp8	1.29383e+06	1.42399e+06	1.41001e+06	1.58608e+06	413154	413154	244577	245849
Q810A7	4	4	191.65	ATP-dendent RNA helicase DDX42 OS=Mus musculus GN=Ddx42 =1 SV=3	Ddx42	1.2855e+06	1.28821e+06	1.20894e+06	1.29186e+06	1.35186e+07	1.35186e+07	1.27382e+07	1.40607e+07
Q6ZQ88	3	3	171.49	Lysine-scific histone demethylase 1A OS=Mus musculus GN=Kdm1a =1 SV=2	Kdm1a	1.28452e+06	1.36209e+06	1.38766e+06	1.37464e+06	5.84497e+06	5.84497e+06	8.22823e+06	4.63608e+06
Q8BTM8	1	1	51.74	Filamin-A OS=Mus musculus GN=Flna PE=1 SV=5	Flna	1.28394e+06	1.12083e+06	1.04753e+06	1.38013e+06	362102	362102	401746	420795
O88983	1	1	37.38	Syntaxin-8 OS=Mus musculus GN=Stx8 =1 SV=1	Stx8	1.27703e+06	1.16522e+06	1.47424e+06	1.26541e+06	0	0	0	0
Q6PDG5	1	1	42.68	SWI/SNF complex subunit SMARCC2 OS=Mus musculus GN=Smarcc2 =1 SV=2	Smarcc2	1.27409e+06	956516	340544	298445	2.94025e+06	2.94025e+06	2.13681e+06	1.9053e+06
Q9JHW2	3	3	127.67	Omega-amidase NIT2 OS=Mus musculus GN=Nit2 =1 SV=1	Nit2	1.27332e+06	1.31202e+06	1.28903e+06	1.33214e+06	0	0	0	0
Q91YR1	3	3	133.3	Twinfilin-1 OS=Mus musculus GN=Twf1 =1 SV=2	Twf1	1.26856e+06	1.22339e+06	1.58982e+06	1.65224e+06	0	0	0	0
P62137	2	2	101.17	Serine/threonine-protein phosphatase PP1-alpha catalytic subunit OS=Mus musculus GN=Ppp1ca =1 SV=1	Ppp1ca	1.26581e+06	961324	980842	1.18047e+06	3.06959e+06	3.06959e+06	3.45678e+06	2.86567e+06
Q9DAW6	1	1	63.78	U4/U6 small nuclear ribonucleoprotein Prp4 OS=Mus musculus GN=Prpf4 =1 SV=1	Prpf4	1.26304e+06	1.09779e+06	966199	946618	4.37658e+06	4.37658e+06	4.67524e+06	5.48975e+06
P32020	1	1	38.11	Non-scific lipid-transfer protein OS=Mus musculus GN=Scp2 =1 SV=3	Scp2	1.26119e+06	1.00084e+06	1.29765e+06	1.46412e+06	225817	225817	351942	278200
Q91VR2	2	2	105.07	ATP synthase subunit gamma, mitochondrial OS=Mus musculus GN=Atp5c1 =1 SV=1	Atp5c1	1.25915e+06	1.41178e+06	905576	1.15437e+06	0	0	0	0
Q61069	1	1	60.19	Upstream stimulatory factor 1 OS=Mus musculus GN=Usf1 =1 SV=1	Usf1	1.2564e+06	1.04748e+06	1.30049e+06	1.38167e+06	5.12584e+06	5.12584e+06	5.47762e+06	5.38731e+06
Q9ERG0	8	8	471.65	LIM domain and actin-binding protein 1 OS=Mus musculus GN=Lima1 =1 SV=3	Lima1	1.25554e+06	1.22375e+06	1.05017e+06	1.20722e+06	1.43789e+06	1.43789e+06	1.19532e+06	1.34937e+06
Q3THJ3	1	1	47.93	Probable RNA-binding protein EIF1AD OS=Mus musculus GN=Eif1ad =1 SV=2	Eif1ad	1.24953e+06	970024	1.16061e+06	1.26078e+06	0	0	0	0
Q8BH69	1	1	36.9	Selenide, water dikinase 1 OS=Mus musculus GN=Sephs1 =1 SV=1	Sephs1	1.24885e+06	1.12554e+06	1.52566e+06	1.39887e+06	167062	167062	86866.1	21195.1
Q91VM5	3	3	128.09	RNA binding motif protein, X-linked-like-1 OS=Mus musculus GN=Rbmxl1 =1 SV=1	Rbmxl1	1.24417e+06	825270	905935	418731	1.93654e+07	1.93654e+07	1.79543e+07	1.80419e+07
Q99L45	6	6	298.72	Eukaryotic translation initiation factor 2 subunit 2 OS=Mus musculus GN=Eif2s2 =1 SV=1	Eif2s2	1.23603e+06	1.5868e+06	1.6406e+06	1.931e+06	1.58302e+07	1.58302e+07	1.37906e+07	1.50561e+07
Q9D0K2	1	1	57.83	Succinyl-CoA:3-ketoacid coenzyme A transferase 1, mitochondrial OS=Mus musculus GN=Oxct1 PE=1 SV=1	Oxct1	1.23446e+06	1.78659e+06	1.70937e+06	2.02903e+06	587774	587774	802607	809420
Q9CYH6	3	3	284.32	Ribosome biogenesis regulatory protein homolog OS=Mus musculus GN=Rrs1 PE=1 SV=1	Rrs1	1.23131e+06	1.46862e+06	1.45028e+06	893751	0	0	0	0
Q9DCG9	1	1	56.08	Multifunctional methyltransferase subunit TRM112-like protein OS=Mus musculus GN=Trmt112 PE=1 SV=1	Trmt112	1.22199e+06	1.23443e+06	1.062e+06	1.36916e+06	1.44811e+06	1.44811e+06	910145	1.03313e+06
P63087	3	3	162.54	Serine/threonine-protein phosphatase PP1-gamma catalytic subunit OS=Mus musculus GN=Ppp1cc =1 SV=1	Ppp1cc	1.22046e+06	1.10445e+06	1.00987e+06	1.08457e+06	2.40367e+06	2.40367e+06	3.35694e+06	3.45111e+06
P97371	1	1	46.12	Proteasome activator complex subunit 1 OS=Mus musculus GN=Psme1 PE=1 SV=2	Psme1	1.21909e+06	1.23321e+06	1.10009e+06	1.34461e+06	0	0	0	0
Q9CQU1	3	3	136.9	Microfibrillar-associated protein 1 OS=Mus musculus GN=Mfap1 =1 SV=1	Mfap1	1.21873e+06	1.24195e+06	1.62673e+06	1.44805e+06	1.42505e+06	1.42505e+06	917899	902159
O08915	2	2	92.82	AH receptor-interacting protein OS=Mus musculus GN=Aip =1 SV=1	Aip	1.21785e+06	1.09934e+06	973758	1.11259e+06	0	0	0	0
Q91VR8	1	1	46.7	Protein BRICK1 OS=Mus musculus GN=Brk1 =1 SV=1	Brk1	1.21521e+06	720970	734193	84392	0	0	0	0
Q99LF4	7	7	358.35	tRNA-splicing ligase RtcB homolog OS=Mus musculus GN=Rtcb =1 SV=1	Rtcb	1.21203e+06	1.02408e+06	1.30495e+06	1.35359e+06	7.41343e+06	7.41343e+06	6.52091e+06	8.919e+06
P35550	11	11	880.17	rRNA 2'-O-methyltransferase fibrillarin OS=Mus musculus GN=Fbl PE=1 SV=2	Fbl	1.20858e+06	1.22662e+06	1.07176e+06	1.41538e+06	2.04408e+06	2.04408e+06	2.03369e+06	1.01726e+06
O35435	5	5	215.41	Dihydroorotate dehydrogenase (quinone), mitochondrial OS=Mus musculus GN=Dhodh =1 SV=2	Dhodh	1.20818e+06	1.19918e+06	1.35143e+06	1.33807e+06	0	0	0	0
Q91WK2	3	3	141	Eukaryotic translation initiation factor 3 subunit H OS=Mus musculus GN=Eif3h =1 SV=1	Eif3h	1.20735e+06	1.3983e+06	1.19388e+06	1.45147e+06	696283	696283	535942	728537
Q9JJT9	1	1	36.37	Phosphorylated adapter RNA export protein OS=Mus musculus GN=Phax =1 SV=1	Phax	1.20693e+06	1.14238e+06	1.2773e+06	1.14935e+06	0	0	0	0
O88952	3	3	203.28	Protein lin-7 homolog C OS=Mus musculus GN=Lin7c =1 SV=2	Lin7c	1.20654e+06	1.13158e+06	989032	919090	1.69328e+06	1.69328e+06	1.88245e+06	2.14438e+06
P62274	1	1	58.2	40S ribosomal protein S29 OS=Mus musculus GN=Rps29 =3 SV=2	Rps29	1.20385e+06	1.10135e+06	970971	1.05799e+06	1.91445e+06	1.91445e+06	1.47713e+06	1.90192e+06
Q9JMA2	1	1	78.22	Queuine tRNA-ribosyltransferase catalytic subunit 1 OS=Mus musculus GN=Qtrt1 =1 SV=2	Qtrt1	1.19325e+06	810299	1.12225e+06	1.18612e+06	0	0	0	0
P13597	3	3	200.17	Intercellular adhesion molecule 1 OS=Mus musculus GN=Icam1 =1 SV=1	Icam1	1.18884e+06	1.06963e+06	1.12076e+06	1.32343e+06	0	0	0	0
P47738	3	3	187.08	Aldehyde dehydrogenase, mitochondrial OS=Mus musculus GN=Aldh2 =1 SV=1	Aldh2	1.18357e+06	1.48419e+06	1.29821e+06	1.42657e+06	6.52618e+06	6.52618e+06	6.70249e+06	6.08898e+06
P61965	1	1	61.73	WD repeat-containing protein 5 OS=Mus musculus GN=Wdr5 PE=1 SV=1	Wdr5	1.18226e+06	1.56802e+06	1.26227e+06	1.47135e+06	1.82248e+07	1.82248e+07	1.75266e+07	1.5803e+07
Q9D7F7	1	1	52.17	Charged multivesicular body protein 4c OS=Mus musculus GN=Chmp4c PE=2 SV=1	Chmp4c	1.17713e+06	902024	769960	922705	88466.3	88466.3	515202	16800.2
Q3U7R1	1	1	38.17	Extended synaptotagmin-1 OS=Mus musculus GN=Esyt1 =1 SV=2	Esyt1	1.17588e+06	925032	926109	828615	13099.2	13099.2	105792	142782
Q9JLJ2	2	2	95.29	4-trimethylaminobutyraldehyde dehydrogenase OS=Mus musculus GN=Aldh9a1 PE=1 SV=1	Aldh9a1	1.17124e+06	1.69315e+06	1.11325e+06	1.58325e+06	0	0	0	0
Q6A068	1	1	46.63	Cell division cycle 5-like protein OS=Mus musculus GN=Cdc5l PE=1 SV=2	Cdc5l	1.16634e+06	1.26777e+06	1.11232e+06	1.21726e+06	9.83518e+06	9.83518e+06	8.59319e+06	8.30626e+06
Q9JHU9	2	2	92.24	Inositol-3-phosphate synthase 1 OS=Mus musculus GN=Isyna1 =1 SV=1	Isyna1	1.16622e+06	1.13798e+06	1.32603e+06	1.12206e+06	0	0	0	0
Q78IK4	2	2	86.87	MICOS complex subunit Mic27 OS=Mus musculus GN=Apool =1 SV=1	Apool	1.1583e+06	1.02539e+06	1.15054e+06	1.14238e+06	0	0	0	0
Q8R146	4	4	244.71	Acylamino-acid-releasing enzyme OS=Mus musculus GN=Ah =1 SV=3	Ah	1.15074e+06	1.32001e+06	1.07024e+06	1.118e+06	0	0	0	0
Q9CR09	1	1	47.15	Ubiquitin-fold modifier-conjugating enzyme 1 OS=Mus musculus GN=Ufc1 PE=1 SV=1	Ufc1	1.14432e+06	844746	750878	1.14467e+06	0	0	0	0
P82343	2	1	97.57	N-acylglucosamine 2-epimerase OS=Mus musculus GN=Renbp PE=1 SV=3	Renbp	1.14321e+06	1.21097e+06	1.19932e+06	1.52801e+06	0	0	0	0
Q9JKF1	4	4	197.57	Ras GTPase-activating-like protein IQGAP1 OS=Mus musculus GN=Iqgap1 PE=1 SV=2	Iqgap1	1.14124e+06	1.17765e+06	1.13955e+06	1.186e+06	207543	207543	410605	953505
Q9WVE8	3	3	151.92	Protein kinase C and casein kinase substrate in neurons protein 2 OS=Mus musculus GN=Pacsin2 =1 SV=1	Pacsin2	1.14069e+06	1.10382e+06	1.27485e+06	1.60106e+06	802725	802725	961422	1.00482e+06
Q8BP92	1	1	42.97	Reticulocalbin-2 OS=Mus musculus GN=Rcn2 =1 SV=1	Rcn2	1.13764e+06	1.22503e+06	1.06399e+06	1.37671e+06	0	0	0	0
Q91YP2	1	1	62.04	Neurolysin, mitochondrial OS=Mus musculus GN=Nln PE=1 SV=1	Nln	1.12877e+06	1.13035e+06	1.13327e+06	1.20168e+06	0	0	0	0
Q9CWK3	2	2	115.33	CD2 antigen cytoplasmic tail-binding protein 2 OS=Mus musculus GN=Cd2bp2 =1 SV=1	Cd2bp2	1.12604e+06	1.08886e+06	1.16351e+06	1.36318e+06	940271	940271	300287	304532
Q9Z2I8	1	1	46.48	Succinate--CoA ligase [GDP-forming] subunit beta, mitochondrial OS=Mus musculus GN=Suclg2 PE=1 SV=3	Suclg2	1.11491e+06	1.13787e+06	1.25963e+06	1.55933e+06	912968	912968	1.14232e+06	1.03433e+06
Q8VBT9	2	2	106.79	Tether containing UBX domain for GLUT4 OS=Mus musculus GN=Aspscr1 =1 SV=1	Aspscr1	1.11442e+06	1.04098e+06	963942	994898	0	0	0	0
P10649	3	3	155.04	Glutathione S-transferase Mu 1 OS=Mus musculus GN=Gstm1 PE=1 SV=2	Gstm1	1.11358e+06	1.32872e+06	1.03178e+06	1.24485e+06	0	0	0	0
Q8CI12	6	6	334.58	Smoothelin-like protein 2 OS=Mus musculus GN=Smtnl2 =1 SV=1	Smtnl2	1.11342e+06	943481	928512	1.0678e+06	0	0	0	0
Q09143	1	1	42.28	High affinity cationic amino acid transporter 1 OS=Mus musculus GN=Slc7a1 =1 SV=1	Slc7a1	1.11341e+06	1.23949e+06	1.3382e+06	1.54837e+06	0	0	0	0
Q9QUH0	1	1	36.74	Glutaredoxin-1 OS=Mus musculus GN=Glrx =1 SV=3	Glrx	1.11101e+06	1.06122e+06	1.17449e+06	1.35531e+06	0	0	0	0
Q8CAQ8	8	8	391.49	MICOS complex subunit Mic60 OS=Mus musculus GN=Immt =1 SV=1	Immt	1.10924e+06	1.12018e+06	1.06426e+06	1.21304e+06	0	0	0	0
Q923G2	1	1	43.23	DNA-directed RNA polymerases I, II, and III subunit RPABC3 OS=Mus musculus GN=Polr2h =1 SV=3	Polr2h	1.10576e+06	1.46706e+06	1.21113e+06	1.51946e+06	388294	388294	395175	323244
P59328	1	1	53.74	WD reat and HMG-box DNA-binding protein 1 OS=Mus musculus GN=Wdhd1 =1 SV=2	Wdhd1	1.10427e+06	1.33144e+06	976641	1.26974e+06	0	0	0	0
Q64521	6	6	288.59	Glycerol-3-phosphate dehydrogenase, mitochondrial OS=Mus musculus GN=Gpd2 =1 SV=2	Gpd2	1.10331e+06	1.02769e+06	1.10207e+06	1.11328e+06	0	0	0	0
Q9D6Z1	4	4	231.84	Nucleolar protein 56 OS=Mus musculus GN=Nop56 =1 SV=2	Nop56	1.1015e+06	1.06986e+06	1.04961e+06	1.34653e+06	187258	187258	1.98033e+06	1.30218e+06
Q64327	1	1	49.45	Male-enhanced antigen 1 OS=Mus musculus GN=Mea1 =1 SV=1	Mea1	1.09753e+06	872734	920051	1.14561e+06	0	0	0	0
P59999	3	3	152.59	Actin-related protein 2/3 complex subunit 4 OS=Mus musculus GN=Arpc4 =1 SV=3	Arpc4	1.09613e+06	979798	1.14857e+06	1.05021e+06	297563	297563	313982	319397
Q9QZ23	2	2	91.18	NFU1 iron-sulfur cluster scaffold homolog, mitochondrial OS=Mus musculus GN=Nfu1 =1 SV=2	Nfu1	1.09366e+06	907206	1.09373e+06	1.08616e+06	531781	531781	561021	534191
Q9WTX5	3	3	151.79	S-phase kinase-associated protein 1 OS=Mus musculus GN=Skp1 =1 SV=3	Skp1	1.09116e+06	1.14985e+06	1.17772e+06	1.28396e+06	1.12432e+06	1.12432e+06	1.18445e+06	959595
Q91V12	1	1	55.62	Cytosolic acyl coenzyme A thioester hydrolase OS=Mus musculus GN=Acot7 PE=1 SV=2	Acot7	1.08954e+06	983591	1.11576e+06	1.00986e+06	195985	195985	173689	0
P83870	1	1	40.46	PHD finger-like domain-containing protein 5A OS=Mus musculus GN=Phf5a =1 SV=1	Phf5a	1.08887e+06	1.15438e+06	1.12513e+06	1.10927e+06	3.2304e+06	3.2304e+06	2.33749e+06	647324
P61967	1	1	50.32	AP-1 complex subunit sigma-1A OS=Mus musculus GN=Ap1s1 =1 SV=1	Ap1s1	1.08619e+06	1.10561e+06	731595	981515	0	0	0	0
Q61391	2	2	88.57	Neprilysin OS=Mus musculus GN=Mme =1 SV=3	Mme	1.08598e+06	1.00438e+06	1.11201e+06	1.06401e+06	0	0	0	0
Q9DD02	1	1	42.58	Protein Hikeshi OS=Mus musculus GN=Hikeshi =1 SV=1	Hikeshi	1.07765e+06	913952	949454	1.16213e+06	0	0	0	0
P26645	1	1	28.79	Myristoylated alanine-rich C-kinase substrate OS=Mus musculus GN=Marcks =1 SV=2	Marcks	1.07597e+06	1.55719e+06	0	23885.7	85013.3	85013.3	95972.8	83543.5
Q8BT60	3	3	139.02	Copine-3 OS=Mus musculus GN=Cpne3 =1 SV=2	Cpne3	1.0707e+06	1.24206e+06	1.17438e+06	1.28439e+06	0	0	0	0
Q80XU3	3	3	139.35	Nuclear ubiquitous casein and cyclin-dendent kinase substrate 1 OS=Mus musculus GN=Nucks1 =1 SV=1	Nucks1	1.06694e+06	1.20502e+06	972208	1.0913e+06	153833	153833	162771	139746
O35841	3	3	164.04	Apoptosis inhibitor 5 OS=Mus musculus GN=Api5 =1 SV=2	Api5	1.06498e+06	1.17327e+06	1.08725e+06	1.24882e+06	8.63235e+06	8.63235e+06	6.48837e+06	5.78767e+06
P10518	3	3	209.31	Delta-aminolevulinic acid dehydratase OS=Mus musculus GN=Alad =1 SV=1	Alad	1.06468e+06	1.06667e+06	932925	1.76736e+06	0	0	0	0
Q9D8S4	3	3	156.81	Oligoribonuclease, mitochondrial OS=Mus musculus GN=Rexo2 =1 SV=2	Rexo2	1.06421e+06	1.03802e+06	1.15106e+06	1.30712e+06	0	0	0	0
O55023	1	1	52.46	Inositol monophosphatase 1 OS=Mus musculus GN=Impa1 PE=1 SV=1	Impa1	1.0588e+06	1.07678e+06	992705	1.16722e+06	0	0	0	0
Q61081	2	2	91.33	Hsp90 co-chaperone Cdc37 OS=Mus musculus GN=Cdc37 PE=1 SV=1	Cdc37	1.05873e+06	1.1718e+06	913378	1.02432e+06	0	0	0	0
P35505	1	1	57.89	Fumarylacetoacetase OS=Mus musculus GN=Fah =1 SV=2	Fah	1.05631e+06	715838	756871	1.16204e+06	0	0	0	0
Q9CWU9	1	1	107.02	Nucleoporin Nup37 OS=Mus musculus GN=Nup37 =1 SV=2	Nup37	1.0533e+06	991020	867301	1.01064e+06	0	0	0	0
Q8C2Q3	2	2	129.06	RNA-binding protein 14 OS=Mus musculus GN=Rbm14 =1 SV=1	Rbm14	1.05099e+06	942287	1.01595e+06	963159	1.09684e+07	1.09684e+07	1.15787e+07	1.22937e+07
Q9DBH5	5	5	223.91	Vesicular integral-membrane protein VIP36 OS=Mus musculus GN=Lman2 =1 SV=2	Lman2	1.04896e+06	910956	889859	1.02017e+06	120775	120775	157593	564029
Q9CXI5	1	1	74.74	Mesencephalic astrocyte-derived neurotrophic factor OS=Mus musculus GN=Manf =1 SV=1	Manf	1.044e+06	1.03942e+06	1.05435e+06	1.30994e+06	1.08814e+06	1.08814e+06	1.5102e+06	1.22498e+06
P10605	3	3	131.77	Cathepsin B OS=Mus musculus GN=Ctsb =1 SV=2	Ctsb	1.04158e+06	1.10284e+06	802161	703487	1.84543e+06	1.84543e+06	1.67576e+06	1.75629e+06
Q8JZK9	1	1	46.24	Hydroxymethylglutaryl-CoA synthase, cytoplasmic OS=Mus musculus GN=Hmgcs1 PE=1 SV=1	Hmgcs1	1.04148e+06	1.02461e+06	994348	1.00805e+06	0	0	0	0
Q6P5E6	1	1	77.62	ADP-ribosylation factor-binding protein GGA2 OS=Mus musculus GN=Gga2 =1 SV=1	Gga2	1.04011e+06	2991.07	0	99.4767	0	0	0	0
Q8C0L6	1	1	40.44	Peroxisomal N(1)-acetyl-spermine/spermidine oxidase OS=Mus musculus GN=Paox PE=1 SV=3	Paox	1.03939e+06	1.0929e+06	880854	1.00347e+06	0	0	0	0
P61205	1	1	45.6	ADP-ribosylation factor 3 OS=Mus musculus GN=Arf3 =2 SV=2	Arf3	1.03516e+06	1.04011e+06	1.14936e+06	1.10413e+06	316002	316002	332856	345873
P08226	3	3	239.4	Apolipoprotein E OS=Mus musculus GN=Apoe =1 SV=2	Apoe	1.03491e+06	1.25542e+06	1.06925e+06	1.60479e+06	0	0	0	0
Q9WV98	1	1	68.66	Mitochondrial import inner membrane translocase subunit Tim9 OS=Mus musculus GN=Timm9 =1 SV=1	Timm9	1.03328e+06	1.15628e+06	1.21896e+06	1.50265e+06	1.38356e+06	1.38356e+06	734084	1.27331e+06
Q99LI7	1	1	74.24	Cleavage stimulation factor subunit 3 OS=Mus musculus GN=Cstf3 =1 SV=1	Cstf3	1.03105e+06	730124	955004	1.17057e+06	5.15876e+06	5.15876e+06	4.784e+06	4.72461e+06
Q9CQW1	2	2	112.18	Synaptobrevin homolog YKT6 OS=Mus musculus GN=Ykt6 =1 SV=1	Ykt6	1.02977e+06	1.05203e+06	588138	989831	0	0	0	0
Q9DBD5	2	2	191.01	Proline-, glutamic acid- and leucine-rich protein 1 OS=Mus musculus GN=lp1 =1 SV=2	lp1	1.02663e+06	893311	825369	885694	867524	867524	958640	1.09307e+06
Q9D8X2	2	2	127.64	Coiled-coil domain-containing protein 124 OS=Mus musculus GN=Ccdc124 =1 SV=1	Ccdc124	1.02512e+06	978272	1.11606e+06	1.03387e+06	1.27341e+06	1.27341e+06	1.1973e+06	1.44448e+06
Q3UL36	2	2	101.21	Arginine and glutamate-rich protein 1 OS=Mus musculus GN=Arglu1 =1 SV=2	Arglu1	1.02095e+06	1.0779e+06	993930	1.14191e+06	2.23634e+06	2.23634e+06	1.37359e+06	1.60615e+06
Q8BH04	3	3	169.85	Phosphoenolpyruvate carboxykinase [GTP], mitochondrial OS=Mus musculus GN=Pck2 =1 SV=1	Pck2	1.01872e+06	993852	1.08412e+06	1.03154e+06	1.63674e+06	1.63674e+06	1.92926e+06	2.04551e+06
Q9CQS2	1	1	46.26	H/ACA ribonucleoprotein complex subunit 3 OS=Mus musculus GN=Nop10 =3 SV=1	Nop10	1.01506e+06	895604	784933	935949	1.04879e+06	1.04879e+06	873716	853602
O35691	4	4	204.22	Pinin OS=Mus musculus GN=Pnn =1 SV=4	Pnn	1.01308e+06	1.20733e+06	1.02024e+06	1.33116e+06	1.12202e+06	1.12202e+06	2.23992e+06	2.10469e+06
Q61103	1	1	48.45	Zinc finger protein ubi-d4 OS=Mus musculus GN=Dpf2 =1 SV=1	Dpf2	1.00472e+06	896751	1.18417e+06	1.06285e+06	1.56414e+07	1.56414e+07	1.39564e+07	1.33227e+07
Q8VCI5	2	2	88.75	roxisomal biogenesis factor 19 OS=Mus musculus GN=x19 =1 SV=1	x19	1.00387e+06	1.13628e+06	772063	1.06369e+06	0	0	0	0
Q6NXI6	1	1	36.46	Regulation of nuclear pre-mRNA domain-containing protein 2 OS=Mus musculus GN=Rprd2 =1 SV=1	Rprd2	1.00226e+06	874190	1.54616e+06	1.67861e+06	192140	192140	198129	4684.97
Q9DCZ4	1	1	64.17	MICOS complex subunit Mic26 OS=Mus musculus GN=Apoo =1 SV=2	Apoo	1.00025e+06	1.36858e+06	1.05351e+06	1.21357e+06	0	0	0	0
Q9Z0X1	2	2	80.43	Apoptosis-inducing factor 1, mitochondrial OS=Mus musculus GN=Aifm1 =1 SV=1	Aifm1	989436	985671	883137	1.10256e+06	2.20893e+06	2.20893e+06	2.31185e+06	1.92145e+06
Q8JZQ9	3	3	159.91	Eukaryotic translation initiation factor 3 subunit B OS=Mus musculus GN=Eif3b =1 SV=1	Eif3b	982628	1.3453e+06	1.16335e+06	1.15884e+06	855046	855046	651612	669384
Q62241	2	2	98.79	U1 small nuclear ribonucleoprotein C OS=Mus musculus GN=Snrpc =1 SV=1	Snrpc	979901	1.1498e+06	1.1677e+06	1.3592e+06	3.2919e+07	3.2919e+07	2.97427e+07	3.12263e+07
Q91VU0	3	3	203.21	Protein FAM3C OS=Mus musculus GN=Fam3c =1 SV=1	Fam3c	979138	1.00468e+06	936682	1.0455e+06	0	0	0	0
P62874	2	2	110.61	Guanine nucleotide-binding protein G(I)/G(S)/G(T) subunit beta-1 OS=Mus musculus GN=Gnb1 =1 SV=3	Gnb1	978662	919568	959504	1.04056e+06	0	0	0	0
P39447	5	5	247.91	Tight junction protein ZO-1 OS=Mus musculus GN=Tjp1 =1 SV=2	Tjp1	978483	722150	726007	820144	845904	845904	688198	572769
P36552	1	1	49.95	Oxygen-dependent coproporphyrinogen-III oxidase, mitochondrial OS=Mus musculus GN=Cpox PE=1 SV=2	Cpox	978229	974892	1.2334e+06	1.24045e+06	688014	688014	385684	77864.4
Q3TCN2	3	3	185.57	Putative phospholipase B-like 2 OS=Mus musculus GN=Plbd2 =1 SV=2	Plbd2	976923	863420	1.06383e+06	930578	153287	153287	185546	10465.3
Q61584	3	3	229	Fragile X mental retardation syndrome-related protein 1 OS=Mus musculus GN=Fxr1 =1 SV=2	Fxr1	976732	1.37561e+06	1.09775e+06	1.66999e+06	1.3825e+06	1.3825e+06	1.56093e+06	1.73107e+06
O54825	7	7	359.92	Bystin OS=Mus musculus GN=Bysl =1 SV=3	Bysl	973018	1.01037e+06	919530	1.09905e+06	274837	274837	353606	327539
Q6ZQ38	3	3	130.24	Cullin-associated NEDD8-dissociated protein 1 OS=Mus musculus GN=Cand1 =1 SV=2	Cand1	971745	910094	1.01954e+06	1.15274e+06	0	0	0	0
Q9Z1Q5	3	3	153.98	Chloride intracellular channel protein 1 OS=Mus musculus GN=Clic1 =1 SV=3	Clic1	971510	976076	938528	965569	0	0	0	0
Q9JKY0	1	1	46.39	Cell differentiation protein RCD1 homolog OS=Mus musculus GN=Rqcd1 =1 SV=1	Rqcd1	971403	1.19901e+06	980540	933935	1.05534e+06	1.05534e+06	1.25185e+06	142310
P46460	2	1	84.89	Vesicle-fusing ATPase OS=Mus musculus GN=Nsf =1 SV=2	Nsf	970953	1.00131e+06	784241	40777.1	9.9564e+06	9.9564e+06	8.70391e+06	9.79002e+06
Q9CR26	1	1	45.86	Vacuolar protein sorting-associated protein VTA1 homolog OS=Mus musculus GN=Vta1 =1 SV=1	Vta1	969738	897170	887083	1.07941e+06	0	0	0	0
P40336	1	1	46.47	Vacuolar protein sorting-associated protein 26A OS=Mus musculus GN=Vps26a =1 SV=1	Vps26a	969451	901971	865296	1.17037e+06	181422	181422	8713.32	0
P63085	1	1	50.04	Mitogen-activated protein kinase 1 OS=Mus musculus GN=Mapk1 PE=1 SV=3	Mapk1	965939	1.34392e+06	1.14692e+06	1.47551e+06	394623	394623	395141	353269
P60521	2	2	108.74	Gamma-aminobutyric acid receptor-associated protein-like 2 OS=Mus musculus GN=Gabarapl2 =1 SV=1	Gabarapl2	963650	946195	982541	1.24423e+06	396672	396672	344741	399332
Q61191	2	2	116.22	Host cell factor 1 OS=Mus musculus GN=Hcfc1 =1 SV=2	Hcfc1	960982	957299	1.17828e+06	1.1349e+06	8.16727e+06	8.16727e+06	6.87781e+06	6.78786e+06
O54879	1	1	47.43	High mobility group protein B3 OS=Mus musculus GN=Hmgb3 =1 SV=3	Hmgb3	960330	1.0119e+06	987857	1.09379e+06	3.37793e+06	3.37793e+06	3.02898e+06	2.92208e+06
O55029	5	5	220.5	Coatomer subunit beta' OS=Mus musculus GN=Copb2 =1 SV=2	Copb2	957263	929773	1.05903e+06	1.22255e+06	337424	337424	378962	230131
Q9CQE0	1	1	45.97	E3 ubiquitin-protein ligase RNF138 OS=Mus musculus GN=Rnf138 =2 SV=1	Rnf138	957046	911596	772183	786149	0	0	0	316608
Q8R4X3	2	2	120.96	RNA-binding protein 12 OS=Mus musculus GN=Rbm12 =1 SV=3	Rbm12	954796	1.02705e+06	953871	1.08011e+06	0	0	0	0
Q91VM9	1	1	48.89	Inorganic pyrophosphatase 2, mitochondrial OS=Mus musculus GN=Ppa2 PE=1 SV=1	Ppa2	951881	862979	838101	923222	51346.9	51346.9	202773	274712
P54822	1	1	49.91	Adenylosuccinate lyase OS=Mus musculus GN=Adsl PE=1 SV=2	Adsl	951298	908227	660174	920125	0	0	0	0
Q9CQR6	1	1	56.56	Serine/threonine-protein phosphatase 6 catalytic subunit OS=Mus musculus GN=Ppp6c PE=1 SV=1	Ppp6c	949703	1.08205e+06	942885	1.09153e+06	0	0	0	0
O70252	1	1	38.14	Heme oxygenase 2 OS=Mus musculus GN=Hmox2 =1 SV=1	Hmox2	945925	1.00128e+06	1.5008e+06	1.73913e+06	0	0	0	0
Q9CQV7	1	1	60.34	Mitochondrial import inner membrane translocase subunit TIM14 OS=Mus musculus GN=Dnajc19 =1 SV=3	Dnajc19	941527	966028	692148	1.20347e+06	0	0	0	0
Q9D187	1	1	54.86	Mitotic spindle-associated MMXD complex subunit MIP18 OS=Mus musculus GN=Fam96b =1 SV=1	Fam96b	935447	1.40251e+06	2.16162e+06	2.14633e+06	0	0	0	0
P63216	1	1	39.21	Guanine nucleotide-binding protein G(I)/G(S)/G(O) subunit gamma-3 OS=Mus musculus GN=Gng3 =1 SV=1	Gng3	934501	839868	115770	19486.7	0	0	0	0
P51569	1	1	54.49	Alpha-galactosidase A OS=Mus musculus GN=Gla =1 SV=1	Gla	933400	890364	880433	900869	0	0	0	0
Q9JKF7	2	2	137.11	39S ribosomal protein L39, mitochondrial OS=Mus musculus GN=Mrpl39 =1 SV=4	Mrpl39	932591	902127	995257	829173	491173	491173	152067	306342
P56873	2	2	105.6	Sjoegren syndrome/scleroderma autoantigen 1 homolog OS=Mus musculus GN=Sssca1 =1 SV=1	Sssca1	931280	1.02529e+06	791635	948066	0	0	0	0
Q02248	1	1	56.13	Catenin beta-1 OS=Mus musculus GN=Ctnnb1 PE=1 SV=1	Ctnnb1	929710	982593	845152	972998	88970.5	88970.5	169381	32805.8
Q61539	1	1	40.51	Steroid hormone receptor ERR2 OS=Mus musculus GN=Esrrb =1 SV=2	Esrrb	928691	749749	921905	796322	4.24105e+06	4.24105e+06	7.17391e+06	1.01875e+07
Q01730	1	1	39.58	Ras suppressor protein 1 OS=Mus musculus GN=Rsu1 =1 SV=3	Rsu1	925184	462373	510310	335007	0	0	0	0
Q8C0I1	1	1	44.89	Alkyldihydroxyacetonephosphate synthase, roxisomal OS=Mus musculus GN=Agps =1 SV=1	Agps	918679	858930	539232	595622	0	0	0	0
P61804	2	2	106.09	Dolichyl-diphosphooligosaccharide--protein glycosyltransferase subunit DAD1 OS=Mus musculus GN=Dad1 =1 SV=3	Dad1	916541	820710	799479	908538	0	0	0	0
Q8BMF4	3	3	195.89	Dihydrolipoyllysine-residue acetyltransferase component of pyruvate dehydrogenase complex, mitochondrial OS=Mus musculus GN=Dlat =1 SV=2	Dlat	915776	1.00995e+06	739256	848538	1.28156e+06	1.28156e+06	973215	1.09197e+06
Q4VBE8	1	1	61.71	WD reat-containing protein 18 OS=Mus musculus GN=Wdr18 =1 SV=1	Wdr18	915242	969712	1.08735e+06	1.17056e+06	1.69856e+06	1.69856e+06	1.06328e+06	1.05986e+06
P19426	2	2	116.67	Negative elongation factor E OS=Mus musculus GN=Nelfe =1 SV=2	Nelfe	910985	758295	865372	829354	833537	833537	911677	551289
Q9D8Y0	1	1	50.14	EF-hand domain-containing protein D2 OS=Mus musculus GN=Efhd2 PE=1 SV=1	Efhd2	908037	464698	790585	794986	0	0	0	0
P11688	4	4	207.73	Integrin alpha-5 OS=Mus musculus GN=Itga5 =1 SV=3	Itga5	907955	887070	772186	736922	0	0	0	0
P62196	1	1	43.2	26S protease regulatory subunit 8 OS=Mus musculus GN=Psmc5 PE=1 SV=1	Psmc5	905502	849618	853569	855878	0	0	0	0
Q64012	3	3	146.98	RNA-binding protein Raly OS=Mus musculus GN=Raly =1 SV=3	Raly	904399	1.08978e+06	864726	1.01824e+06	7.40589e+07	7.40589e+07	6.50724e+07	6.35544e+07
Q6GQT9	4	4	228.79	Nodal modulator 1 OS=Mus musculus GN=Nomo1 =1 SV=1	Nomo1	901924	840543	973554	1.01607e+06	0	0	0	0
Q8BGC0	1	1	41.96	HIV Tat-scific factor 1 homolog OS=Mus musculus GN=Htatsf1 =1 SV=1	Htatsf1	897594	668182	757340	810580	640269	640269	584190	490637
P15626	2	2	70.03	Glutathione S-transferase Mu 2 OS=Mus musculus GN=Gstm2 =1 SV=2	Gstm2	897408	736179	724112	827918	0	0	0	0
Q7TMY4	2	2	92.95	THO complex subunit 7 homolog OS=Mus musculus GN=Thoc7 =1 SV=2	Thoc7	894975	918610	1.06524e+06	1.14738e+06	719039	719039	539416	464353
Q91ZR2	1	1	51.74	Sorting nexin-18 OS=Mus musculus GN=Snx18 =1 SV=1	Snx18	894700	992466	838783	796402	0	0	0	0
Q64191	2	2	128.47	N(4)-(beta-N-acetylglucosaminyl)-L-asparaginase OS=Mus musculus GN=Aga =1 SV=1	Aga	891686	1.24462e+06	1.20448e+06	1.17946e+06	0	0	0	0
Q8BK58	1	1	44.43	HSPB1-associated protein 1 OS=Mus musculus GN=Hspbap1 =1 SV=2	Hspbap1	890367	1.54833e+06	821622	1.23987e+06	0	0	0	0
Q8BP48	1	1	89.15	Methionine aminoptidase 1 OS=Mus musculus GN=Metap1 =1 SV=1	Metap1	890020	773911	699552	934905	899211	899211	1.12678e+06	574217
Q91ZW3	2	2	79.84	SWI/SNF-related matrix-associated actin-dendent regulator of chromatin subfamily A member 5 OS=Mus musculus GN=Smarca5 =1 SV=1	Smarca5	887513	835152	820311	934791	1.01051e+07	1.01051e+07	1.62464e+07	1.6878e+07
Q61074	1	1	49.93	Protein phosphatase 1G OS=Mus musculus GN=Ppm1g PE=1 SV=3	Ppm1g	882767	980618	932221	941421	0	0	0	0
D3YZP9	1	1	46.63	Coiled-coil domain-containing protein 6 OS=Mus musculus GN=Ccdc6 =1 SV=1	Ccdc6	879745	772490	704754	1.02155e+06	0	0	0	0
Q8CG72	2	2	75.96	Poly(ADP-ribose) glycohydrolase ARH3 OS=Mus musculus GN=Adprhl2 =1 SV=1	Adprhl2	878892	953923	761832	990739	0	0	0	0
Q9DB05	2	2	110.35	Alpha-soluble NSF attachment protein OS=Mus musculus GN=Napa =1 SV=1	Napa	878745	1.04346e+06	724469	818594	445228	445228	552117	652336
P37913	4	4	178.62	DNA ligase 1 OS=Mus musculus GN=Lig1 =1 SV=2	Lig1	875221	862433	787097	900338	178240	178240	186127	246814
Q9CSN1	7	7	445.41	SNW domain-containing protein 1 OS=Mus musculus GN=Snw1 =1 SV=3	Snw1	874062	821623	791311	740157	4.91094e+06	4.91094e+06	5.16792e+06	6.52858e+06
Q6ZWU9	1	1	72.4	40S ribosomal protein S27 OS=Mus musculus GN=Rps27 =1 SV=3	Rps27	873175	1.51015e+06	1.23674e+06	1.5255e+06	4.47298e+06	4.47298e+06	2.27582e+06	2.26201e+06
Q8VE80	1	1	56.13	THO complex subunit 3 OS=Mus musculus GN=Thoc3 =2 SV=1	Thoc3	870856	807224	950627	947922	0	0	0	0
Q8CCI5	1	1	56.3	RING1 and YY1-binding protein OS=Mus musculus GN=Rybp =1 SV=1	Rybp	867841	1.37657e+06	1.59267e+06	2.1189e+06	3.72984e+07	3.72984e+07	3.22717e+07	3.02735e+07
Q99K28	2	2	129.16	ADP-ribosylation factor GTPase-activating protein 2 OS=Mus musculus GN=Arfgap2 =1 SV=1	Arfgap2	867029	843535	565340	784228	0	0	0	0
Q9D892	2	2	103.65	Inosine triphosphate pyrophosphatase OS=Mus musculus GN=Itpa PE=1 SV=2	Itpa	866649	1.11179e+06	1.03035e+06	740949	0	0	0	0
Q62376	2	2	78.14	U1 small nuclear ribonucleoprotein 70 kDa OS=Mus musculus GN=Snrnp70 =1 SV=2	Snrnp70	864072	883551	933526	887716	3.3862e+07	3.3862e+07	2.49567e+07	3.1948e+07
Q8BVU5	3	3	129.65	ADP-ribose pyrophosphatase, mitochondrial OS=Mus musculus GN=Nudt9 =1 SV=1	Nudt9	862896	773256	868458	1.21055e+06	0	0	0	0
Q9CQH3	1	1	75.39	NADH dehydrogenase [ubiquinone] 1 beta subcomplex subunit 5, mitochondrial OS=Mus musculus GN=Ndufb5 =1 SV=1	Ndufb5	862787	1.17357e+06	1.27095e+06	1.2079e+06	0	0	0	0
Q791V5	1	1	47.31	Mitochondrial carrier homolog 2 OS=Mus musculus GN=Mtch2 =1 SV=1	Mtch2	861748	956791	842991	892650	0	0	0	0
Q8CBW3	1	1	40.53	Abl interactor 1 OS=Mus musculus GN=Abi1 =1 SV=3	Abi1	860727	784927	830191	885502	0	0	0	0
Q9R0I7	1	1	51.47	YLP motif-containing protein 1 OS=Mus musculus GN=Ylpm1 =2 SV=2	Ylpm1	850113	829975	627955	808425	0	0	0	0
Q9JKV1	1	1	43.68	Proteasomal ubiquitin receptor ADRM1 OS=Mus musculus GN=Adrm1 PE=1 SV=2	Adrm1	847567	900602	620566	794837	0	0	0	0
Q91UZ5	2	2	111.31	Inositol monophosphatase 2 OS=Mus musculus GN=Impa2 PE=1 SV=1	Impa2	847507	1.07573e+06	919382	1.17342e+06	0	0	0	0
Q2L4X1	4	4	159.76	Basic leucine zipr and W2 domain-containing protein 2 OS=Mus musculus molossinus GN=Bzw2 =2 SV=1	Bzw2	844320	733583	878789	828326	481278	481278	394218	435814
Q99KH8	2	2	101.59	Serine/threonine-protein kinase 24 OS=Mus musculus GN=Stk24 =1 SV=1	Stk24	842213	778189	723169	788731	440114	440114	387911	26348.9
Q8VDL4	2	2	99.38	ADP-dendent glucokinase OS=Mus musculus GN=Adpgk =1 SV=2	Adpgk	841842	807602	761661	916602	0	0	0	0
O35855	4	4	221.46	Branched-chain-amino-acid aminotransferase, mitochondrial OS=Mus musculus GN=Bcat2 =1 SV=2	Bcat2	839839	875846	1.03622e+06	1.19566e+06	432319	432319	433692	382390
Q3UPH1	2	2	122.27	Protein PRRC1 OS=Mus musculus GN=Prrc1 =1 SV=1	Prrc1	835826	878141	729482	885539	1.16465e+06	1.16465e+06	1.30109e+06	1.14459e+06
Q9CQZ6	1	1	42.43	NADH dehydrogenase [ubiquinone] 1 beta subcomplex subunit 3 OS=Mus musculus GN=Ndufb3 =1 SV=1	Ndufb3	834745	805768	668071	739294	0	0	0	0
O54818	1	1	59.19	Tumor protein D53 OS=Mus musculus GN=Tpd52l1 =1 SV=1	Tpd52l1	830373	790451	568419	4473.33	0	0	0	0
Q3TKY6	2	2	107.65	ptidyl-prolyl cis-trans isomerase CWC27 homolog OS=Mus musculus GN=Cwc27 =1 SV=1	Cwc27	815397	807019	1.16694e+06	1.05894e+06	1.08737e+06	1.08737e+06	1.09327e+06	1.15691e+06
Q61335	2	2	120.18	B-cell receptor-associated protein 31 OS=Mus musculus GN=Bcap31 =1 SV=4	Bcap31	814308	1.594e+06	1.82952e+06	1.57661e+06	0	0	0	0
Q9EPL8	1	1	43.26	Importin-7 OS=Mus musculus GN=Ipo7 =1 SV=2	Ipo7	813220	1.09647e+06	1.02683e+06	1.0801e+06	0	0	0	0
Q8CJ53	1	1	65.4	Cdc42-interacting protein 4 OS=Mus musculus GN=Trip10 =1 SV=2	Trip10	808693	952015	786474	1.18398e+06	0	0	0	0
Q8R1N4	2	2	138.81	NudC domain-containing protein 3 OS=Mus musculus GN=Nudcd3 =1 SV=3	Nudcd3	801361	742519	887408	1.07073e+06	0	0	0	0
Q9R0Q3	1	1	45.83	Transmembrane emp24 domain-containing protein 2 OS=Mus musculus GN=Tmed2 =1 SV=1	Tmed2	801199	669741	756327	810701	0	0	0	0
Q80U78	2	2	79.88	Pumilio homolog 1 OS=Mus musculus GN=Pum1 =1 SV=2	Pum1	798508	833722	767512	912403	1.28039e+06	1.28039e+06	1.04185e+06	723815
Q921J4	1	1	45.07	Ubiquitin-conjugating enzyme E2 S OS=Mus musculus GN=Ube2s =1 SV=1	Ube2s	797539	905019	1.03036e+06	819084	0	0	0	0
Q9CQ54	2	2	105.14	NADH dehydrogenase [ubiquinone] 1 subunit C2 OS=Mus musculus GN=Ndufc2 =1 SV=1	Ndufc2	793641	1.01033e+06	870137	890573	0	0	0	0
Q9CWI3	1	1	45.21	BRCA2 and CDKN1A-interacting protein OS=Mus musculus GN=Bccip PE=1 SV=1	Bccip	791317	908455	852387	857854	0	0	0	0
Q9Z0G0	2	2	112.21	PDZ domain-containing protein GIPC1 OS=Mus musculus GN=Gipc1 =1 SV=1	Gipc1	790923	703168	758737	700391	0	0	0	0
Q60931	2	1	123.97	Voltage-dendent anion-selective channel protein 3 OS=Mus musculus GN=Vdac3 =1 SV=1	Vdac3	789873	806718	667715	831162	0	0	0	0
P51660	4	4	222	roxisomal multifunctional enzyme ty 2 OS=Mus musculus GN=Hsd17b4 =1 SV=3	Hsd17b4	789181	850705	685967	816694	187514	187514	198732	220432
O35129	5	5	252.46	Prohibitin-2 OS=Mus musculus GN=Phb2 =1 SV=1	Phb2	787696	987324	1.0661e+06	1.12059e+06	0	0	0	0
O70318	2	2	117.11	Band 4.1-like protein 2 OS=Mus musculus GN=Epb41l2 =1 SV=2	Epb41l2	786638	802729	780098	926415	2.70247e+06	2.70247e+06	3.07885e+06	2.70041e+06
Q9Z1M8	2	2	78.67	Protein Red OS=Mus musculus GN=Ik =1 SV=2	Ik	785918	266600	319062	789943	2.5772e+06	2.5772e+06	2.44299e+06	1.4329e+06
Q9R0Y5	2	2	97.2	Adenylate kinase isoenzyme 1 OS=Mus musculus GN=Ak1 PE=1 SV=1	Ak1	782483	903691	755287	885402	0	0	0	0
Q8BG30	2	2	137	Negative elongation factor A OS=Mus musculus GN=Nelfa =1 SV=1	Nelfa	782308	773922	864817	903432	0	0	0	0
Q9QYJ0	2	2	104.46	DnaJ homolog subfamily A member 2 OS=Mus musculus GN=Dnaja2 =1 SV=1	Dnaja2	781820	613898	593542	749031	527447	527447	520421	492475
O88544	2	2	121.26	COP9 signalosome complex subunit 4 OS=Mus musculus GN=Cops4 PE=1 SV=1	Cops4	775350	832656	838331	957392	0	0	0	0
Q5SWD9	1	1	65.3	Pre-rRNA-processing protein TSR1 homolog OS=Mus musculus GN=Tsr1 =1 SV=1	Tsr1	774159	852371	557699	895999	0	0	0	0
Q8VE99	2	2	97.88	Coiled-coil domain-containing protein 115 OS=Mus musculus GN=Ccdc115 =1 SV=1	Ccdc115	774097	781624	873028	920053	0	0	0	0
Q8K297	4	4	246.2	Procollagen galactosyltransferase 1 OS=Mus musculus GN=Colgalt1 =1 SV=2	Colgalt1	773717	656396	588459	638588	2.45287e+06	2.45287e+06	1.26717e+06	434099
O08810	6	6	277.66	116 kDa U5 small nuclear ribonucleoprotein component OS=Mus musculus GN=Eftud2 =1 SV=1	Eftud2	772692	889358	691659	850883	8.67059e+06	8.67059e+06	7.42572e+06	7.38245e+06
Q9WU84	1	1	50.37	Copper chaperone for superoxide dismutase OS=Mus musculus GN=Ccs PE=1 SV=1	Ccs	771579	757013	650511	713184	0	0	0	0
Q61387	2	2	150.85	Cytochrome c oxidase subunit 7A-related protein, mitochondrial OS=Mus musculus GN=Cox7a2l =1 SV=1	Cox7a2l	770222	594212	555486	768372	0	0	0	0
P83882	1	1	41.19	60S ribosomal protein L36a OS=Mus musculus GN=Rpl36a =1 SV=2	Rpl36a	766278	786118	714187	726247	0	0	0	0
Q9CR95	2	2	108.64	Adaptin ear-binding coat-associated protein 1 OS=Mus musculus GN=Necap1 =1 SV=2	Necap1	766032	783747	673839	767232	0	0	0	0
Q920B9	1	1	97.17	FACT complex subunit SPT16 OS=Mus musculus GN=Supt16h =1 SV=2	Supt16h	764139	692375	541366	798989	1.34499e+07	1.34499e+07	1.29342e+07	8.41522e+06
Q6PB93	2	2	87.04	Polyptide N-acetylgalactosaminyltransferase 2 OS=Mus musculus GN=Galnt2 =1 SV=1	Galnt2	763872	801662	800423	860668	0	0	0	0
P00375	1	1	50.17	Dihydrofolate reductase OS=Mus musculus GN=Dhfr PE=1 SV=3	Dhfr	761559	630856	629191	786720	0	0	0	0
Q99PL5	1	1	54.72	Ribosome-binding protein 1 OS=Mus musculus GN=Rrbp1 =1 SV=2	Rrbp1	760629	706442	743603	1.13129e+06	2.3316e+06	2.3316e+06	1.70907e+06	3.01648e+06
Q8BH43	2	2	110.5	Wiskott-Aldrich syndrome protein family member 2 OS=Mus musculus GN=Wasf2 =1 SV=1	Wasf2	760611	685614	717202	956597	0	0	0	0
O55143	2	2	94.87	Sarcoplasmic/endoplasmic reticulum calcium ATPase 2 OS=Mus musculus GN=Atp2a2 =1 SV=2	Atp2a2	757071	760477	684593	787029	0	0	0	0
B2RY56	1	1	38.36	RNA-binding protein 25 OS=Mus musculus GN=Rbm25 =1 SV=2	Rbm25	756418	513631	574966	674757	8.7627e+06	8.7627e+06	6.65578e+06	6.02612e+06
Q61881	5	5	269.64	DNA replication licensing factor MCM7 OS=Mus musculus GN=Mcm7 =1 SV=1	Mcm7	755823	917390	838915	974096	1.54415e+07	1.54415e+07	1.37047e+07	1.44718e+07
Q9CQJ6	1	1	51	Density-regulated protein OS=Mus musculus GN=Denr =1 SV=1	Denr	754231	820176	747615	949695	0	0	0	0
Q9Z1X4	3	3	164.41	Interleukin enhancer-binding factor 3 OS=Mus musculus GN=Ilf3 =1 SV=2	Ilf3	751379	762404	648540	1.07358e+06	3.77602e+07	3.77602e+07	3.56204e+07	4.38657e+07
Q3TYX3	2	2	97.06	SET and MYND domain-containing protein 5 OS=Mus musculus GN=Smyd5 =1 SV=2	Smyd5	750109	665474	526478	671125	0	0	0	0
P57746	4	4	215.9	V-ty proton ATPase subunit D OS=Mus musculus GN=Atp6v1d =1 SV=1	Atp6v1d	749888	778494	667611	854704	0	0	0	0
Q9D0L8	1	1	52.11	mRNA cap guanine-N7 methyltransferase OS=Mus musculus GN=Rnmt =1 SV=1	Rnmt	748519	853167	636485	897189	487374	487374	281683	816979
O55142	2	2	85.52	60S ribosomal protein L35a OS=Mus musculus GN=Rpl35a PE=1 SV=2	Rpl35a	748263	817551	592820	594331	0	0	0	0
Q9JJA4	1	1	102.43	Ribosome biogenesis protein WDR12 OS=Mus musculus GN=Wdr12 =1 SV=1	Wdr12	747834	389324	375613	579806	0	0	0	0
Q8BPB0	2	2	87.16	MOB kinase activator 1B OS=Mus musculus GN=Mob1b =1 SV=3	Mob1b	746067	753251	894649	883158	0	0	0	0
Q8R344	3	3	126.03	Coiled-coil domain-containing protein 12 OS=Mus musculus GN=Ccdc12 =1 SV=2	Ccdc12	746010	662901	760013	745983	1.69332e+06	1.69332e+06	1.38841e+06	1.43488e+06
Q6P5E4	3	3	189.01	UDP-glucose:glycoprotein glucosyltransferase 1 OS=Mus musculus GN=Uggt1 =1 SV=4	Uggt1	745097	751549	697096	943171	91423.6	91423.6	127898	231877
P57716	1	1	70.84	Nicastrin OS=Mus musculus GN=Ncstn =1 SV=3	Ncstn	744626	805416	887090	981680	0	0	0	0
P29416	1	1	52.49	Beta-hexosaminidase subunit alpha OS=Mus musculus GN=Hexa =1 SV=2	Hexa	742901	693264	720575	803473	1.17483e+06	1.17483e+06	1.22251e+06	1.114e+06
P26350	1	1	58.88	Prothymosin alpha OS=Mus musculus GN=Ptma PE=1 SV=2	Ptma	740517	1.40417e+06	933692	1.19957e+06	0	0	0	0
Q8CGZ0	3	3	190.98	Calcium homeostasis endoplasmic reticulum protein OS=Mus musculus GN=Cherp =1 SV=1	Cherp	738719	741556	776274	725628	1.16208e+07	1.16208e+07	1.14221e+07	1.05485e+07
Q9D154	2	2	117.52	Leukocyte elastase inhibitor A OS=Mus musculus GN=Serpinb1a PE=1 SV=1	Serpinb1a	737843	633269	608779	564836	0	0	0	0
P62960	1	1	54.46	Nuclease-sensitive element-binding protein 1 OS=Mus musculus GN=Ybx1 =1 SV=3	Ybx1	735093	1.21718e+06	1.01777e+06	1.16967e+06	1.02778e+08	1.02778e+08	9.15383e+07	8.93489e+07
Q9JHS9	2	2	95.59	Spliceosome-associated protein CWC15 homolog OS=Mus musculus GN=Cwc15 =1 SV=1	Cwc15	734728	901531	900181	976340	4.17482e+06	4.17482e+06	3.70793e+06	3.7321e+06
Q9DBF1	2	2	93.6	Alpha-aminoadipic semialdehyde dehydrogenase OS=Mus musculus GN=Aldh7a1 PE=1 SV=4	Aldh7a1	734318	735818	678559	786415	0	0	0	0
Q99KB8	2	2	74.78	Hydroxyacylglutathione hydrolase, mitochondrial OS=Mus musculus GN=Hagh =1 SV=2	Hagh	731738	663213	659012	869240	0	0	0	0
O08664	1	1	56.24	B-cell CLL/lymphoma 7 protein family member C OS=Mus musculus GN=Bcl7c =1 SV=1	Bcl7c	726487	392929	1.09463e+06	1.18855e+06	4.44552e+06	4.44552e+06	3.68245e+06	4.0138e+06
P21956	2	2	103.96	Lactadherin OS=Mus musculus GN=Mfge8 =1 SV=3	Mfge8	725979	691058	624901	621364	0	0	0	0
Q5FWK3	3	3	183.01	Rho GTPase-activating protein 1 OS=Mus musculus GN=Arhgap1 =1 SV=1	Arhgap1	724144	846962	552093	635126	0	0	0	0
P35278	1	1	56.02	Ras-related protein Rab-5C OS=Mus musculus GN=Rab5c PE=1 SV=2	Rab5c	723458	740510	731674	893940	0	0	0	0
O55125	3	3	142.07	Protein NipSnap homolog 1 OS=Mus musculus GN=Nipsnap1 =1 SV=1	Nipsnap1	722836	872942	834189	856907	712009	712009	790868	521178
Q61543	3	3	185.82	Golgi apparatus protein 1 OS=Mus musculus GN=Glg1 =1 SV=1	Glg1	721699	949814	871004	628581	0	0	0	0
Q80WW9	2	2	90.22	DDRGK domain-containing protein 1 OS=Mus musculus GN=Ddrgk1 =1 SV=2	Ddrgk1	721040	725628	850311	957708	2.02123e+06	2.02123e+06	1.86756e+06	1.75621e+06
Q9Z315	1	1	55.62	U4/U6.U5 tri-snRNP-associated protein 1 OS=Mus musculus GN=Sart1 =1 SV=1	Sart1	720461	912178	756291	846075	2.50838e+06	2.50838e+06	3.61589e+06	3.67404e+06
Q8R3D1	1	1	44.27	TBC1 domain family member 13 OS=Mus musculus GN=Tbc1d13 =1 SV=1	Tbc1d13	718286	609953	820611	772976	0	0	0	0
Q6P9R2	1	1	49.34	Serine/threonine-protein kinase OSR1 OS=Mus musculus GN=Oxsr1 =1 SV=1	Oxsr1	714796	793358	930349	1.08176e+06	0	0	0	0
Q9R0A0	2	2	78.72	roxisomal membrane protein X14 OS=Mus musculus GN=x14 =1 SV=1	x14	713369	674171	557334	368171	0	0	0	0
Q9CZW5	2	2	118.48	Mitochondrial import receptor subunit TOM70 OS=Mus musculus GN=Tomm70 =1 SV=2	Tomm70	710268	533416	492724	601285	0	0	0	0
Q9CR51	2	2	113.47	V-ty proton ATPase subunit G 1 OS=Mus musculus GN=Atp6v1g1 =1 SV=3	Atp6v1g1	706328	748973	732166	672762	0	0	0	0
O09111	1	1	45.05	NADH dehydrogenase [ubiquinone] 1 beta subcomplex subunit 11, mitochondrial OS=Mus musculus GN=Ndufb11 =1 SV=2	Ndufb11	705443	817401	887382	875342	0	0	0	0
Q99J09	3	3	178.42	Methylosome protein 50 OS=Mus musculus GN=Wdr77 PE=1 SV=1	Wdr77	705331	759921	895324	856238	75648.2	75648.2	111471	79398.5
Q9D2G2	2	2	135.57	Dihydrolipoyllysine-residue succinyltransferase component of 2-oxoglutarate dehydrogenase complex, mitochondrial OS=Mus musculus GN=Dlst =1 SV=1	Dlst	703228	844091	548128	689361	1.3291e+06	1.3291e+06	1.01496e+06	639952
Q9QYI3	2	2	85.97	DnaJ homolog subfamily C member 7 OS=Mus musculus GN=Dnajc7 =1 SV=2	Dnajc7	700233	635145	648951	881008	0	0	0	0
Q62167	6	6	310.46	ATP-dendent RNA helicase DDX3X OS=Mus musculus GN=Ddx3x =1 SV=3	Ddx3x	698523	721226	766866	737453	1.88774e+06	1.88774e+06	1.8899e+06	2.17152e+06
Q9CQU5	1	1	37.14	ZW10 interactor OS=Mus musculus GN=Zwint =1 SV=1	Zwint	697106	519873	411396	550869	0	0	0	0
Q99J99	2	2	109.46	3-mercaptopyruvate sulfurtransferase OS=Mus musculus GN=Mpst PE=1 SV=3	Mpst	696969	750775	822825	895493	47092.4	47092.4	79399.1	679379
Q6P5F9	3	3	186.67	Exportin-1 OS=Mus musculus GN=Xpo1 =1 SV=1	Xpo1	696422	809625	804831	1.03215e+06	1.07835e+06	1.07835e+06	1.19701e+06	1.35532e+06
Q922V4	1	1	39.21	Pleiotropic regulator 1 OS=Mus musculus GN=Plrg1 =1 SV=1	Plrg1	695261	608614	817825	942561	4.15198e+06	4.15198e+06	4.43581e+06	3.1338e+06
P08556	1	1	51.95	GTPase NRas OS=Mus musculus GN=Nras PE=1 SV=1	Nras	691842	739930	706725	890131	0	0	208278	158619
Q63871	1	1	53.29	DNA-directed RNA polymerases I, II, and III subunit RPABC4 OS=Mus musculus GN=Polr2k =3 SV=2	Polr2k	691398	850086	832330	1.03585e+06	1.40973e+06	1.40973e+06	1.1186e+06	1.15339e+06
Q62448	4	4	204.46	Eukaryotic translation initiation factor 4 gamma 2 OS=Mus musculus GN=Eif4g2 =1 SV=2	Eif4g2	691242	911961	723868	932098	624723	624723	473083	557936
Q922U1	2	2	85.37	U4/U6 small nuclear ribonucleoprotein Prp3 OS=Mus musculus GN=Prpf3 =1 SV=1	Prpf3	690872	531880	570022	709165	2.85316e+06	2.85316e+06	5.21383e+06	4.6731e+06
O88545	4	4	183.02	COP9 signalosome complex subunit 6 OS=Mus musculus GN=Cops6 =1 SV=1	Cops6	689714	681820	552763	589371	0	0	0	0
P11103	4	4	255.62	Poly [ADP-ribose] polymerase 1 OS=Mus musculus GN=Parp1 =1 SV=3	Parp1	688601	646356	641870	755585	3.69245e+07	3.69245e+07	4.01824e+07	3.96155e+07
Q8CCK0	1	1	52.6	Core histone macro-H2A.2 OS=Mus musculus GN=H2afy2 =1 SV=3	H2afy2	684497	720944	1.09327e+06	770071	5.32044e+06	5.32044e+06	4.53081e+06	4.76599e+06
Q9CX97	2	2	74.29	WD reat-containing protein 55 OS=Mus musculus GN=Wdr55 =1 SV=2	Wdr55	681836	640632	631165	728489	0	0	0	0
Q8K4Z3	1	1	37.25	NAD(P)H-hydrate epimerase OS=Mus musculus GN=Naxe =1 SV=1	Naxe	680522	650106	752423	756418	0	0	0	0
P56371	2	2	90.25	Ras-related protein Rab-4A OS=Mus musculus GN=Rab4a =1 SV=2	Rab4a	680280	676089	593661	637523	0	0	0	0
Q8R464	1	1	50.26	Cell adhesion molecule 4 OS=Mus musculus GN=Cadm4 =1 SV=1	Cadm4	678361	874395	575979	816515	1.51274e+06	1.51274e+06	1.46337e+06	635945
Q9EPB4	1	1	44.04	Apoptosis-associated speck-like protein containing a CARD OS=Mus musculus GN=Pycard PE=1 SV=1	Pycard	678015	710840	712477	797455	0	0	0	0
P35293	2	2	119.03	Ras-related protein Rab-18 OS=Mus musculus GN=Rab18 =1 SV=2	Rab18	676722	632806	558785	596152	197295	197295	37213.3	151443
Q8CHP5	2	2	198.22	Partner of Y14 and mago OS=Mus musculus GN=Pym1 =1 SV=2	Pym1	673032	540308	588906	599742	1.26245e+06	1.26245e+06	1.38506e+06	1.33312e+06
O35857	2	2	127.34	Mitochondrial import inner membrane translocase subunit TIM44 OS=Mus musculus GN=Timm44 =1 SV=2	Timm44	668995	707016	732229	717670	18911	18911	0	69514.5
Q99JR1	3	3	196.01	Sideroflexin-1 OS=Mus musculus GN=Sfxn1 =1 SV=3	Sfxn1	668695	641438	553444	827194	0	0	0	0
O35344	2	2	91.44	Importin subunit alpha-4 OS=Mus musculus GN=Kpna3 =1 SV=1	Kpna3	667459	649441	701688	819272	1.65338e+06	1.65338e+06	1.75978e+06	1.28581e+06
P47740	2	2	95.4	Fatty aldehyde dehydrogenase OS=Mus musculus GN=Aldh3a2 =1 SV=2	Aldh3a2	666205	766897	680169	923614	0	0	0	0
Q6IRU5	4	4	185.26	Clathrin light chain B OS=Mus musculus GN=Cltb =1 SV=1	Cltb	666143	1.20294e+06	1.00685e+06	1.08627e+06	0	0	0	0
Q8BTZ7	2	2	88.3	Mannose-1-phosphate guanyltransferase beta OS=Mus musculus GN=Gmppb =1 SV=1	Gmppb	666137	770524	632120	765810	0	0	0	0
Q91XF0	1	1	58.08	Pyridoxine-5'-phosphate oxidase OS=Mus musculus GN=Pnpo =1 SV=1	Pnpo	665391	944541	976652	866029	0	0	0	0
Q9QYB1	1	1	44.03	Chloride intracellular channel protein 4 OS=Mus musculus GN=Clic4 PE=1 SV=3	Clic4	661829	767375	697346	864121	0	0	0	0
Q6Y7W8	4	4	210.59	RQ amino acid-rich with GYF domain-containing protein 2 OS=Mus musculus GN=Gigyf2 =1 SV=2	Gigyf2	653265	815025	611459	734567	0	0	0	0
Q9R210	3	3	138.65	Transcription factor EB OS=Mus musculus GN=Tfeb =1 SV=2	Tfeb	650775	738850	585636	562288	4.58669e+06	4.58669e+06	4.15431e+06	3.61461e+06
P28659	4	4	202.84	CUGBP Elav-like family member 1 OS=Mus musculus GN=Celf1 =1 SV=2	Celf1	648686	679885	1.10085e+06	1.554e+06	2.09605e+07	2.09605e+07	2.18201e+07	2.32409e+07
B2RQC6	1	1	35.62	CAD protein OS=Mus musculus GN=Cad PE=1 SV=1	Cad	647715	656258	701903	741055	0	0	0	0
Q9D902	1	1	50.18	General transcription factor IIE subunit 2 OS=Mus musculus GN=Gtf2e2 =1 SV=2	Gtf2e2	647399	479612	502905	596150	150994	150994	136642	111269
Q9CQ40	1	1	60.66	39S ribosomal protein L49, mitochondrial OS=Mus musculus GN=Mrpl49 =1 SV=1	Mrpl49	646913	577092	640368	545929	494290	494290	481944	570107
P15532	1	1	54.29	Nucleoside diphosphate kinase A OS=Mus musculus GN=Nme1 =1 SV=1	Nme1	646862	771289	509952	916297	2.19383e+06	2.19383e+06	1.68779e+06	1.64542e+06
P61222	1	1	44.64	ATP-binding cassette sub-family E member 1 OS=Mus musculus GN=Abce1 =1 SV=1	Abce1	645703	659687	530579	756736	114843	114843	106435	75353.4
B1AXP6	2	2	84.45	Mitochondrial import receptor subunit TOM5 homolog OS=Mus musculus GN=Tomm5 =3 SV=1	Tomm5	645101	839172	678418	895346	0	0	0	0
Q9WVJ2	2	2	119.01	26S proteasome non-ATPase regulatory subunit 13 OS=Mus musculus GN=Psmd13 =1 SV=1	Psmd13	644642	607517	721524	767529	0	0	0	0
Q922Q4	1	1	57.65	Pyrroline-5-carboxylate reductase 2 OS=Mus musculus GN=Pycr2 =1 SV=1	Pycr2	644014	783960	555442	713294	2.11771e+06	2.11771e+06	2.17211e+06	1.12645e+06
P62876	1	1	47.04	DNA-directed RNA polymerases I, II, and III subunit RPABC5 OS=Mus musculus GN=Polr2l =3 SV=1	Polr2l	642364	644749	508970	554419	2.20065e+06	2.20065e+06	1.96035e+06	1.6626e+06
Q8R0A0	2	2	97.16	General transcription factor IIF subunit 2 OS=Mus musculus GN=Gtf2f2 =1 SV=1	Gtf2f2	641305	716380	716214	590912	4163.25	4163.25	406929	0
Q7TMX5	1	1	47.98	Protein SHQ1 homolog OS=Mus musculus GN=Shq1 =1 SV=2	Shq1	639396	593160	565432	801171	0	0	0	0
Q9CQ10	1	1	49.13	Charged multivesicular body protein 3 OS=Mus musculus GN=Chmp3 PE=1 SV=3	Chmp3	638776	814315	943625	1.34641e+06	0	0	0	0
Q8CIB6	1	1	68.32	Transmembrane protein 230 OS=Mus musculus GN=Tmem230 =1 SV=1	Tmem230	637713	545664	459842	552805	0	0	0	0
Q9D6U8	2	2	93.81	Protein FAM162A OS=Mus musculus GN=Fam162a =1 SV=1	Fam162a	634441	567835	610387	728789	0	0	0	0
Q9EQ06	1	1	63.4	Estradiol 17-beta-dehydrogenase 11 OS=Mus musculus GN=Hsd17b11 =1 SV=1	Hsd17b11	632869	635383	529184	705989	0	0	0	0
Q8K019	3	3	156.92	Bcl-2-associated transcription factor 1 OS=Mus musculus GN=Bclaf1 =1 SV=2	Bclaf1	631588	569677	630404	702277	103711	103711	187681	189935
P40630	1	1	43.02	Transcription factor A, mitochondrial OS=Mus musculus GN=Tfam =1 SV=2	Tfam	630286	674547	552593	698384	7.66612e+06	7.66612e+06	7.42757e+06	5.64472e+06
Q60848	1	1	38.98	Lymphocyte-scific helicase OS=Mus musculus GN=Hells =1 SV=2	Hells	626257	595379	568334	588116	7.01095e+06	7.01095e+06	6.95559e+06	7.34226e+06
Q9CRA8	4	4	213.78	Exosome complex component RRP46 OS=Mus musculus GN=Exosc5 =1 SV=1	Exosc5	626209	638835	619339	710370	1.08004e+06	1.08004e+06	1.26508e+06	1.18869e+06
Q3V3R1	2	2	108.41	Monofunctional C1-tetrahydrofolate synthase, mitochondrial OS=Mus musculus GN=Mthfd1l =1 SV=2	Mthfd1l	623527	607564	643483	690161	2.91812e+06	2.91812e+06	2.80333e+06	2.55474e+06
Q9D6J5	1	1	45.94	NADH dehydrogenase [ubiquinone] 1 beta subcomplex subunit 8, mitochondrial OS=Mus musculus GN=Ndufb8 =1 SV=1	Ndufb8	622931	495202	651760	569307	0	0	0	0
P62717	3	3	177.82	60S ribosomal protein L18a OS=Mus musculus GN=Rpl18a PE=1 SV=1	Rpl18a	618587	727041	613376	731058	0	0	0	0
P97470	2	2	120.39	Serine/threonine-protein phosphatase 4 catalytic subunit OS=Mus musculus GN=Ppp4c =1 SV=2	Ppp4c	617858	625274	611701	847773	0	0	0	0
Q8BJF9	1	1	65.81	Charged multivesicular body protein 2b OS=Mus musculus GN=Chmp2b =1 SV=1	Chmp2b	615487	442048	495053	662284	0	0	0	0
Q810A3	2	2	87.19	Tetratricoptide reat protein 9C OS=Mus musculus GN=Ttc9c =1 SV=1	Ttc9c	615325	682043	735664	778807	0	0	0	0
O70475	3	3	181.25	UDP-glucose 6-dehydrogenase OS=Mus musculus GN=Ugdh PE=1 SV=1	Ugdh	615273	510505	527008	746809	0	0	0	0
Q99LE6	1	1	45.82	ATP-binding cassette sub-family F member 2 OS=Mus musculus GN=Abcf2 =1 SV=1	Abcf2	614456	566231	577073	559846	2.82865e+06	2.82865e+06	2.6913e+06	2.82982e+06
Q8CI51	1	1	41.26	PDZ and LIM domain protein 5 OS=Mus musculus GN=Pdlim5 =1 SV=4	Pdlim5	613259	546774	512489	571392	0	0	0	0
Q9DCM0	2	2	106.46	rsulfide dioxygenase ETHE1, mitochondrial OS=Mus musculus GN=Ethe1 =1 SV=2	Ethe1	611886	718360	574469	637893	0	0	0	0
P70677	4	4	211.34	Caspase-3 OS=Mus musculus GN=Casp3 =1 SV=1	Casp3	609010	553853	473343	586929	0	0	0	0
Q924H2	1	1	56.89	Mediator of RNA polymerase II transcription subunit 15 OS=Mus musculus GN=Med15 =1 SV=2	Med15	608520	464967	223996	381017	0	0	0	0
Q9QYJ3	2	2	104.42	DnaJ homolog subfamily B member 1 OS=Mus musculus GN=Dnajb1 =1 SV=3	Dnajb1	606200	544485	592520	574369	34645	34645	73313.4	82318.1
Q8R0X7	1	1	40.36	Sphingosine-1-phosphate lyase 1 OS=Mus musculus GN=Sgpl1 =1 SV=1	Sgpl1	605888	530284	548378	542876	0	0	0	0
P97352	1	1	47.77	Protein S100-A13 OS=Mus musculus GN=S100a13 PE=1 SV=1	S100a13	604981	669877	704804	798492	0	0	0	0
O35654	2	2	106.65	DNA polymerase delta subunit 2 OS=Mus musculus GN=Pold2 =1 SV=2	Pold2	603976	645278	583216	795255	267943	267943	9679.68	0
Q9JHR7	1	1	45.48	Insulin-degrading enzyme OS=Mus musculus GN=Ide PE=1 SV=1	Ide	603235	538730	517139	524500	0	0	0	0
P49962	2	2	126.35	Signal recognition particle 9 kDa protein OS=Mus musculus GN=Srp9 =1 SV=2	Srp9	602638	733325	518187	655778	870113	870113	1.01166e+06	771453
Q9D103	1	1	66.13	Interferon-induced transmembrane protein 1 OS=Mus musculus GN=Ifitm1 =2 SV=1	Ifitm1	601884	572880	549333	556992	0	0	0	0
Q8C7K6	1	1	47.66	Prenylcysteine oxidase-like OS=Mus musculus GN=Pcyox1l =1 SV=1	Pcyox1l	600058	528570	539951	431336	0	0	0	0
Q9QYH6	1	1	39.08	Melanoma-associated antigen D1 OS=Mus musculus GN=Maged1 =1 SV=1	Maged1	595215	522267	546102	544210	0	0	0	0
Q9CY62	1	1	49.94	E3 ubiquitin-protein ligase RNF181 OS=Mus musculus GN=Rnf181 PE=1 SV=1	Rnf181	590907	504791	489925	527884	0	0	0	0
Q9D710	1	1	54.77	Thioredoxin-related transmembrane protein 2 OS=Mus musculus GN=Tmx2 =1 SV=1	Tmx2	587796	598391	527655	602537	0	0	0	0
Q91W67	2	2	87.78	Ubiquitin-like protein 7 OS=Mus musculus GN=Ubl7 =1 SV=2	Ubl7	587385	640591	523169	611759	0	0	0	0
Q9CQN1	5	4	303.65	Heat shock protein 75 kDa, mitochondrial OS=Mus musculus GN=Trap1 =1 SV=1	Trap1	585901	586969	455065	592221	4.64534e+06	4.64534e+06	4.61475e+06	2.83334e+06
Q9JIY5	1	1	36.32	Serine protease HTRA2, mitochondrial OS=Mus musculus GN=Htra2 =1 SV=2	Htra2	585545	684178	710725	703837	1.73e+06	1.73e+06	913736	936256
Q9R190	1	1	67.25	Metastasis-associated protein MTA2 OS=Mus musculus GN=Mta2 =1 SV=1	Mta2	583874	434284	519116	254739	7.84281e+06	7.84281e+06	7.03759e+06	8.81048e+06
Q80YD1	1	1	60.9	ATP-dendent RNA helicase SUPV3L1, mitochondrial OS=Mus musculus GN=Supv3l1 =1 SV=1	Supv3l1	583387	556704	631065	639391	490259	490259	277581	265806
Q91YP3	1	1	71.58	Deoxyribose-phosphate aldolase OS=Mus musculus GN=Dera =1 SV=1	Dera	574805	505385	511632	577524	0	0	0	0
Q99LN9	2	2	118.52	Deoxyhypusine hydroxylase OS=Mus musculus GN=Dohh PE=1 SV=2	Dohh	571058	657337	597063	567869	0	0	0	0
P55821	2	1	133.38	Stathmin-2 OS=Mus musculus GN=Stmn2 =1 SV=1	Stmn2	568782	750056	729232	666615	0	0	0	0
Q8R180	2	2	92.91	ERO1-like protein alpha OS=Mus musculus GN=Ero1a =1 SV=2	Ero1a	567064	630366	714158	606248	0	0	0	0
Q9D1E6	1	1	72.09	Tubulin-folding cofactor B OS=Mus musculus GN=Tbcb PE=1 SV=2	Tbcb	566926	616269	663390	700627	0	0	0	0
Q8R2U0	1	1	86.25	Nucleoporin SEH1 OS=Mus musculus GN=Seh1l =2 SV=1	Seh1l	564491	626901	389282	661250	32821.8	32821.8	144191	17155.1
Q60749	3	3	136.68	KH domain-containing, RNA-binding, signal transduction-associated protein 1 OS=Mus musculus GN=Khdrbs1 =1 SV=2	Khdrbs1	564299	464932	493603	519732	1.13062e+07	1.13062e+07	1.03395e+07	1.40248e+07
Q9CWX9	1	1	32.03	Probable ATP-dendent RNA helicase DDX47 OS=Mus musculus GN=Ddx47 =2 SV=2	Ddx47	563721	534761	532839	384748	684297	684297	578550	659648
Q62425	1	1	42.09	Cytochrome c oxidase subunit NDUFA4 OS=Mus musculus GN=Ndufa4 =1 SV=2	Ndufa4	563306	507202	439097	617242	0	0	0	0
Q9Z1D1	1	1	41.97	Eukaryotic translation initiation factor 3 subunit G OS=Mus musculus GN=Eif3g =1 SV=2	Eif3g	561617	619728	698084	695731	0	0	0	0
Q8BWM0	1	1	47.93	Prostaglandin E synthase 2 OS=Mus musculus GN=Ptges2 =1 SV=3	Ptges2	560452	584858	597351	578916	0	0	0	0
Q3TV70	2	2	103.83	Nuclear receptor 2C2-associated protein OS=Mus musculus GN=Nr2c2ap =1 SV=1	Nr2c2ap	558087	528389	579492	530935	0	0	0	0
Q9DB73	4	4	181.66	NADH-cytochrome b5 reductase 1 OS=Mus musculus GN=Cyb5r1 =1 SV=1	Cyb5r1	557536	841381	595847	662544	0	0	0	0
Q9JHP7	1	1	40.02	KDEL motif-containing protein 1 OS=Mus musculus GN=Kdelc1 =1 SV=1	Kdelc1	557097	35856.7	501982	23555.5	0	0	0	0
Q62433	1	1	48.62	Protein NDRG1 OS=Mus musculus GN=Ndrg1 =1 SV=1	Ndrg1	554894	431095	434699	449092	0	0	0	0
P62900	1	1	65.85	60S ribosomal protein L31 OS=Mus musculus GN=Rpl31 PE=1 SV=1	Rpl31	550753	2.47607e+06	2.53736e+06	2.16196e+06	0	0	0	0
Q9JHU4	4	4	187.7	Cytoplasmic dynein 1 heavy chain 1 OS=Mus musculus GN=Dync1h1 =1 SV=2	Dync1h1	548668	617309	456189	667867	667098	667098	649549	425946
Q9D1G2	1	1	46.26	Phosphomevalonate kinase OS=Mus musculus GN=Pmvk PE=1 SV=3	Pmvk	548038	515273	380975	436593	0	0	0	0
Q6P1B1	1	1	46.41	Xaa-Pro aminopeptidase 1 OS=Mus musculus GN=Xpnpep1 PE=1 SV=1	Xpnpep1	547636	544065	499772	520679	0	0	0	0
Q99JX3	1	1	58.21	Golgi reassembly-stacking protein 2 OS=Mus musculus GN=Gorasp2 =1 SV=3	Gorasp2	546753	898057	724505	766438	0	0	0	0
Q78PG9	1	1	57.4	Coiled-coil domain-containing protein 25 OS=Mus musculus GN=Ccdc25 PE=1 SV=1	Ccdc25	545503	1.04457e+06	566293	1.2549e+06	0	0	0	0
P52825	1	1	73.63	Carnitine O-palmitoyltransferase 2, mitochondrial OS=Mus musculus GN=Cpt2 =1 SV=2	Cpt2	544630	524807	608529	706445	0	0	0	0
Q61206	2	2	102.22	Platelet-activating factor acetylhydrolase IB subunit beta OS=Mus musculus GN=Pafah1b2 PE=1 SV=2	Pafah1b2	543173	494096	589308	530142	0	0	0	0
Q9DBR1	1	1	46.68	5'-3' exoribonuclease 2 OS=Mus musculus GN=Xrn2 =1 SV=1	Xrn2	543092	628252	2.38417e+06	1.21309e+06	6.76099e+06	6.76099e+06	7.36758e+06	8.58608e+06
P50096	1	1	56.38	Inosine-5'-monophosphate dehydrogenase 1 OS=Mus musculus GN=Impdh1 =1 SV=2	Impdh1	542483	407392	364617	414175	0	0	0	0
Q8R5J9	1	1	50.26	PRA1 family protein 3 OS=Mus musculus GN=Arl6ip5 =1 SV=2	Arl6ip5	542474	466520	324203	375864	0	0	0	0
O89079	1	1	53.93	Coatomer subunit epsilon OS=Mus musculus GN=Co =1 SV=3	Co	535069	484549	448651	314887	0	0	0	0
Q8BTW9	2	2	90.41	Serine/threonine-protein kinase PAK 4 OS=Mus musculus GN=Pak4 =1 SV=1	Pak4	533884	556380	480514	555595	176529	176529	4904.06	186626
Q8BJY1	2	2	116.61	26S proteasome non-ATPase regulatory subunit 5 OS=Mus musculus GN=Psmd5 PE=1 SV=4	Psmd5	533149	526409	557600	664000	0	0	0	0
Q8R2Y8	2	2	90.66	ptidyl-tRNA hydrolase 2, mitochondrial OS=Mus musculus GN=Ptrh2 =1 SV=1	Ptrh2	533130	431508	498579	558461	0	0	0	0
P32233	1	1	69.67	Developmentally-regulated GTP-binding protein 1 OS=Mus musculus GN=Drg1 =1 SV=1	Drg1	532286	692730	766697	856096	1.69355e+06	1.69355e+06	2.18072e+06	1.57426e+06
Q99LS3	1	1	41.27	Phosphoserine phosphatase OS=Mus musculus GN=Psph PE=1 SV=1	Psph	529616	609292	485344	438633	0	0	0	0
P54726	1	1	36.47	UV excision repair protein RAD23 homolog A OS=Mus musculus GN=Rad23a =1 SV=2	Rad23a	526823	542263	512696	547300	0	0	0	0
Q9CQ49	2	2	101.4	Nuclear cap-binding protein subunit 2 OS=Mus musculus GN=Ncbp2 =1 SV=1	Ncbp2	526416	612494	536866	488615	3.22091e+06	3.22091e+06	2.03358e+06	1.73493e+06
Q9D8S9	2	2	97.29	BolA-like protein 1 OS=Mus musculus GN=Bola1 =1 SV=1	Bola1	526367	491100	345578	464821	0	0	0	0
P26369	2	2	124.36	Splicing factor U2AF 65 kDa subunit OS=Mus musculus GN=U2af2 =1 SV=3	U2af2	524398	541707	654545	637698	4.32955e+07	4.32955e+07	3.69189e+07	4.4847e+07
Q9JLQ0	2	2	87.51	CD2-associated protein OS=Mus musculus GN=Cd2ap =1 SV=3	Cd2ap	522332	420193	544156	520983	0	0	0	0
Q91W50	4	4	208.69	Cold shock domain-containing protein E1 OS=Mus musculus GN=Csde1 =1 SV=1	Csde1	521921	432290	372451	528875	2.61387e+06	2.61387e+06	2.17889e+06	2.09062e+06
Q9CQF3	1	1	62.47	Cleavage and polyadenylation scificity factor subunit 5 OS=Mus musculus GN=Nudt21 =1 SV=1	Nudt21	521732	908773	272240	798830	1.98577e+07	1.98577e+07	1.50299e+07	1.48657e+07
P13864	2	2	107.91	DNA (cytosine-5)-methyltransferase 1 OS=Mus musculus GN=Dnmt1 =1 SV=5	Dnmt1	520566	574506	479575	559582	1.54531e+07	1.54531e+07	1.79187e+07	1.91089e+07
Q9D1Q4	1	1	56.25	Dolichol-phosphate mannosyltransferase subunit 3 OS=Mus musculus GN=Dpm3 =1 SV=1	Dpm3	520542	612586	410536	467461	0	0	0	0
O88491	1	1	42.43	Histone-lysine N-methyltransferase, H3 lysine-36 and H4 lysine-20 scific OS=Mus musculus GN=Nsd1 =1 SV=1	Nsd1	520303	572655	503464	600889	1.51545e+06	1.51545e+06	1.37592e+06	1.52206e+06
P62965	1	1	41.58	Cellular retinoic acid-binding protein 1 OS=Mus musculus GN=Crabp1 PE=1 SV=2	Crabp1	520144	773128	458831	912449	0	0	0	0
Q8R0F6	2	2	85.02	Integrin-linked kinase-associated serine/threonine phosphatase 2C OS=Mus musculus GN=Ilkap =1 SV=1	Ilkap	517606	549623	481399	548747	1.84135e+06	1.84135e+06	1.52585e+06	1.74903e+06
Q8VDD5	1	1	38.73	Myosin-9 OS=Mus musculus GN=Myh9 =1 SV=4	Myh9	516285	504242	500729	626210	0	0	0	0
Q9CYX7	2	2	100.77	RRP15-like protein OS=Mus musculus GN=Rrp15 PE=1 SV=2	Rrp15	515671	656119	618253	580418	0	0	0	0
Q9JJ94	1	1	39.45	Sjoegren syndrome nuclear autoantigen 1 homolog OS=Mus musculus GN=Ssna1 =1 SV=1	Ssna1	510178	373078	473534	629882	0	0	0	0
P97478	1	1	70.97	5-demethoxyubiquinone hydroxylase, mitochondrial OS=Mus musculus GN=Coq7 =1 SV=3	Coq7	509981	660879	357208	588884	0	0	0	0
Q8VCH0	1	1	101.92	3-ketoacyl-CoA thiolase B, roxisomal OS=Mus musculus GN=Acaa1b =1 SV=1	Acaa1b	507922	470519	471626	422386	0	0	0	0
Q91WM3	2	2	104.71	U3 small nucleolar RNA-interacting protein 2 OS=Mus musculus GN=Rrp9 =1 SV=1	Rrp9	505266	419351	406501	436723	2.78831e+06	2.78831e+06	2.93267e+06	2.48833e+06
Q8R3H9	1	1	43.04	Tetratricoptide reat protein 4 OS=Mus musculus GN=Ttc4 =1 SV=1	Ttc4	504817	590834	447298	682657	0	0	0	0
Q811Q9	1	1	82.32	Choline-phosphate cytidylyltransferase B OS=Mus musculus GN=Pcyt1b =1 SV=2	Pcyt1b	502484	679373	661178	659574	0	0	0	0
Q9CQV6	1	1	37.8	Microtubule-associated proteins 1A/1B light chain 3B OS=Mus musculus GN=Map1lc3b =1 SV=3	Map1lc3b	498475	607025	544834	725201	574958	574958	526866	367750
Q99N96	1	1	44.48	39S ribosomal protein L1, mitochondrial OS=Mus musculus GN=Mrpl1 =1 SV=2	Mrpl1	496852	367102	670215	778541	0	0	0	0
Q9ERN0	1	1	63.13	Secretory carrier-associated membrane protein 2 OS=Mus musculus GN=Scamp2 =1 SV=1	Scamp2	495896	456479	413707	334765	0	0	0	0
Q9CXU0	1	1	55.26	Mediator of RNA polymerase II transcription subunit 10 OS=Mus musculus GN=Med10 =1 SV=1	Med10	494978	611583	457147	524338	297666	297666	259627	236723
P97452	1	1	65.69	Ribosome biogenesis protein BOP1 OS=Mus musculus GN=Bop1 =1 SV=1	Bop1	492410	422293	389148	307705	0	0	0	0
Q9WU78	1	1	48.77	Programmed cell death 6-interacting protein OS=Mus musculus GN=Pdcd6ip =1 SV=3	Pdcd6ip	492387	444051	434520	479227	0	0	0	0
O70133	2	2	82.18	ATP-dendent RNA helicase A OS=Mus musculus GN=Dhx9 =1 SV=2	Dhx9	490994	509747	415468	471257	5.41685e+07	5.41685e+07	5.17395e+07	6.14533e+07
Q64310	2	2	96.06	Surfeit locus protein 4 OS=Mus musculus GN=Surf4 =1 SV=1	Surf4	490683	683555	399146	403438	0	0	0	0
Q61205	3	3	140.31	Platelet-activating factor acetylhydrolase IB subunit gamma OS=Mus musculus GN=Pafah1b3 PE=1 SV=1	Pafah1b3	489515	506742	436799	467878	0	0	0	0
Q920A5	1	1	55.81	Retinoid-inducible serine carboxyptidase OS=Mus musculus GN=Scp1 =1 SV=2	Scp1	486517	618886	538024	601161	0	0	0	0
Q61510	1	1	45.34	E3 ubiquitin/ISG15 ligase TRIM25 OS=Mus musculus GN=Trim25 =1 SV=2	Trim25	486315	550261	506870	524314	1.29767e+06	1.29767e+06	654039	780406
A2AR02	1	1	58.48	ptidyl-prolyl cis-trans isomerase G OS=Mus musculus GN=Ppig =1 SV=1	Ppig	485917	560817	650982	649555	2.91426e+06	2.91426e+06	2.62988e+06	1.41697e+06
Q4KML4	1	1	51.15	Costars family protein ABRACL OS=Mus musculus GN=Abracl =1 SV=1	Abracl	484894	469375	344400	354901	0	0	0	0
Q91VI7	2	2	87.87	Ribonuclease inhibitor OS=Mus musculus GN=Rnh1 =1 SV=1	Rnh1	483495	564163	414581	562364	0	0	0	0
O89112	1	1	60.21	LanC-like protein 1 OS=Mus musculus GN=Lancl1 =1 SV=1	Lancl1	482586	453782	364574	546114	0	0	0	0
Q08481	2	2	115.23	Platelet endothelial cell adhesion molecule OS=Mus musculus GN=cam1 =1 SV=1	cam1	481801	469157	490912	559455	0	0	0	0
Q6X893	1	1	33.1	Choline transporter-like protein 1 OS=Mus musculus GN=Slc44a1 =1 SV=3	Slc44a1	481796	791439	754896	961380	0	0	0	0
P23780	1	1	42.3	Beta-galactosidase OS=Mus musculus GN=Glb1 PE=1 SV=1	Glb1	480997	505339	622948	564294	167.469	167.469	105209	18919.7
Q3UA16	1	1	38.48	Kinetochore protein Spc25 OS=Mus musculus GN=Spc25 =2 SV=1	Spc25	480980	595324	543869	577464	0	0	0	0
Q8BZA9	1	1	41.93	Fructose-2,6-bisphosphatase TIGAR OS=Mus musculus GN=Tigar =1 SV=1	Tigar	477470	540645	478695	522234	0	0	0	0
Q9CYL5	2	2	155.81	Golgi-associated plant pathogenesis-related protein 1 OS=Mus musculus GN=Glipr2 =1 SV=3	Glipr2	472304	536269	495573	541805	0	0	0	0
G5E870	4	3	194.72	E3 ubiquitin-protein ligase TRIP12 OS=Mus musculus GN=Trip12 =1 SV=1	Trip12	470929	500631	467595	517036	5.57414e+06	5.57414e+06	3.93231e+06	3.16892e+06
P49443	2	2	96.31	Protein phosphatase 1A OS=Mus musculus GN=Ppm1a =1 SV=1	Ppm1a	469939	508337	383866	458803	0	0	0	0
Q9DBP5	1	1	43.54	UMP-CMP kinase OS=Mus musculus GN=Cmpk1 PE=1 SV=1	Cmpk1	468582	442441	421490	657574	0	0	0	0
Q9CYZ6	1	1	58.5	Uncharacterized protein C19orf60 homolog OS=Mus musculus =1 SV=1	1SV	466918	622605	607890	536406	0	0	0	0
Q9QYE6	1	1	69.48	Golgin subfamily A member 5 OS=Mus musculus GN=Golga5 =1 SV=2	Golga5	461865	392633	395903	437491	0	0	0	0
Q9DCT1	1	1	40.51	1,5-anhydro-D-fructose reductase OS=Mus musculus GN=Akr1e2 =1 SV=1	Akr1e2	460883	596593	423601	463040	0	0	0	0
Q8BFS6	1	1	35.2	Serine/threonine-protein phosphatase CPD1 OS=Mus musculus GN=Cpd1 =1 SV=1	Cpd1	460314	551193	396675	563810	0	0	0	0
Q6PB66	2	2	83.73	Leucine-rich PPR motif-containing protein, mitochondrial OS=Mus musculus GN=Lrpprc =1 SV=2	Lrpprc	460064	622888	585912	624265	2.92724e+06	2.92724e+06	2.69902e+06	2.30662e+06
Q3U9G9	2	2	79.29	Lamin-B receptor OS=Mus musculus GN=Lbr =1 SV=2	Lbr	459936	551605	633604	853572	278930	278930	234473	232429
Q8VDG5	1	1	73.66	Phosphopantothenate--cysteine ligase OS=Mus musculus GN=Ppcs =1 SV=1	Ppcs	459111	380550	297880	366504	0	0	0	0
Q99M31	1	1	53.45	Heat shock 70 kDa protein 14 OS=Mus musculus GN=Hspa14 =1 SV=2	Hspa14	457307	764498	662149	338788	1.92806e+06	1.92806e+06	2.29207e+06	2.16943e+06
Q3TW96	2	2	109.41	UDP-N-acetylhexosamine pyrophosphorylase-like protein 1 OS=Mus musculus GN=Uap1l1 PE=1 SV=1	Uap1l1	456247	521343	442222	497046	0	0	0	0
O09159	2	2	113.46	Lysosomal alpha-mannosidase OS=Mus musculus GN=Man2b1 =1 SV=4	Man2b1	453750	453322	491603	519504	0	0	0	0
Q3V1T4	3	3	178.42	Prolyl 3-hydroxylase 1 OS=Mus musculus GN=P3h1 =1 SV=2	P3h1	452532	376592	348245	478934	0	0	0	0
Q9CQJ4	2	2	96.1	E3 ubiquitin-protein ligase RING2 OS=Mus musculus GN=Rnf2 =1 SV=1	Rnf2	451257	570251	479456	580741	5.8985e+06	5.8985e+06	7.35186e+06	4.56207e+06
Q8VC52	1	1	89.85	RNA-binding protein with multiple splicing 2 OS=Mus musculus GN=Rbpms2 =1 SV=1	Rbpms2	449568	620909	545799	674069	1.16567e+07	1.16567e+07	1.00019e+07	1.0883e+07
Q8BXZ1	1	1	37.22	Protein disulfide-isomerase TMX3 OS=Mus musculus GN=Tmx3 =1 SV=2	Tmx3	449352	425727	549809	502996	0	0	0	0
Q9JJ80	6	6	330.05	Ribosome production factor 2 homolog OS=Mus musculus GN=Rpf2 PE=2 SV=2	Rpf2	449335	426561	590686	468169	0	0	0	0
Q60520	2	2	84.04	Paired amphipathic helix protein Sin3a OS=Mus musculus GN=Sin3a =1 SV=3	Sin3a	448522	518418	585697	561496	6.76424e+06	6.76424e+06	6.28282e+06	6.89929e+06
Q9D0R9	1	1	53.26	WD reat-containing protein 89 OS=Mus musculus GN=Wdr89 =2 SV=1	Wdr89	446818	424499	50156.2	6232.15	206853	206853	184776	288680
P16460	2	2	92.87	Argininosuccinate synthase OS=Mus musculus GN=Ass1 =1 SV=1	Ass1	446742	660145	788267	678801	0	0	0	0
Q8BJL1	1	1	54.43	F-box only protein 30 OS=Mus musculus GN=Fbxo30 PE=1 SV=2	Fbxo30	446716	521106	701733	579519	0	0	0	0
Q00612	1	1	43.63	Glucose-6-phosphate 1-dehydrogenase X OS=Mus musculus GN=G6pdx PE=1 SV=3	G6pdx	446087	282454	259917	372791	0	0	0	0
Q8R1Q8	1	1	54.79	Cytoplasmic dynein 1 light intermediate chain 1 OS=Mus musculus GN=Dync1li1 =1 SV=1	Dync1li1	445391	485548	367082	440867	0	0	0	0
Q9WV69	1	1	51.65	Dematin OS=Mus musculus GN=Dmtn =1 SV=1	Dmtn	444742	270273	283990	340074	669344	669344	712754	433106
P24860	1	1	41.87	G2/mitotic-scific cyclin-B1 OS=Mus musculus GN=Ccnb1 =1 SV=3	Ccnb1	441501	534151	750021	511293	3.39172e+06	3.39172e+06	3.16155e+06	3.30537e+06
Q7TQI3	1	1	68.72	Ubiquitin thioesterase OTUB1 OS=Mus musculus GN=Otub1 PE=1 SV=2	Otub1	441374	469459	509105	612863	0	0	0	0
Q9CXV9	1	1	52.72	DCN1-like protein 5 OS=Mus musculus GN=Dcun1d5 =1 SV=1	Dcun1d5	439647	345071	305857	493605	103718	103718	118429	0
Q99JY0	6	6	375.99	Trifunctional enzyme subunit beta, mitochondrial OS=Mus musculus GN=Hadhb =1 SV=1	Hadhb	437611	446850	444918	406620	1.38334e+06	1.38334e+06	1.79628e+06	1.89228e+06
O35405	1	1	57.8	Phospholipase D3 OS=Mus musculus GN=Pld3 =1 SV=1	Pld3	436706	535988	425438	88645.5	246663	246663	212978	168465
Q05D44	2	2	105.41	Eukaryotic translation initiation factor 5B OS=Mus musculus GN=Eif5b =1 SV=2	Eif5b	436345	624268	524891	609496	4.28494e+06	4.28494e+06	3.52272e+06	4.89582e+06
Q8VCN9	1	1	53	Tubulin-scific charone C OS=Mus musculus GN=Tbcc =1 SV=1	Tbcc	436160	378012	306024	332153	0	0	0	0
P13595	1	1	48.51	Neural cell adhesion molecule 1 OS=Mus musculus GN=Ncam1 =1 SV=3	Ncam1	431523	404501	318702	381622	253868	253868	19547.3	213142
P12815	2	2	79.52	Programmed cell death protein 6 OS=Mus musculus GN=Pdcd6 =1 SV=2	Pdcd6	431502	368120	377795	454069	566947	566947	693987	633361
Q9QZQ1	2	2	142.85	Afadin OS=Mus musculus GN=Afdn =1 SV=3	Afdn	427998	525114	501940	561463	1.41044e+06	1.41044e+06	1.76111e+06	1.63736e+06
Q9ERB0	1	1	55.02	Synaptosomal-associated protein 29 OS=Mus musculus GN=Snap29 =1 SV=1	Snap29	427171	533009	475248	425836	0	0	0	0
Q8CFA2	1	1	42.94	Aminomethyltransferase, mitochondrial OS=Mus musculus GN=Amt =1 SV=1	Amt	427111	453030	510884	608541	2.31061e+06	2.31061e+06	2.12263e+06	2.20461e+06
Q3TXU5	1	1	38.03	Deoxyhypusine synthase OS=Mus musculus GN=Dhps =1 SV=2	Dhps	424210	551376	427859	355337	0	0	0	0
Q9R0L6	2	2	107.15	ricentriolar material 1 protein OS=Mus musculus GN=Pcm1 =1 SV=2	Pcm1	422820	380073	378801	475277	0	0	0	0
Q9CY97	1	1	47.19	RNA polymerase II subunit A C-terminal domain phosphatase SSU72 OS=Mus musculus GN=Ssu72 =1 SV=1	Ssu72	422145	490126	285982	348152	0	0	0	0
Q99J62	2	2	97.37	Replication factor C subunit 4 OS=Mus musculus GN=Rfc4 =1 SV=1	Rfc4	422009	434948	413839	315075	2.41723e+06	2.41723e+06	1.95454e+06	1.95821e+06
Q8CHW4	1	1	48.29	Translation initiation factor eIF-2B subunit epsilon OS=Mus musculus GN=Eif2b5 =1 SV=1	Eif2b5	419509	155961	331510	370828	0	0	0	0
Q9ESZ8	1	1	45.95	General transcription factor II-I OS=Mus musculus GN=Gtf2i =1 SV=3	Gtf2i	418816	457181	466738	669308	4.70151e+06	4.70151e+06	5.20693e+06	4.87355e+06
Q9CWL8	2	2	110.05	Beta-catenin-like protein 1 OS=Mus musculus GN=Ctnnbl1 =1 SV=1	Ctnnbl1	416878	355146	308609	322402	1.24549e+06	1.24549e+06	1.31796e+06	1.37561e+06
Q9DCS3	2	2	112.09	Trans-2-enoyl-CoA reductase, mitochondrial OS=Mus musculus GN=Mecr =1 SV=2	Mecr	415277	419711	395909	483274	59695.5	59695.5	68377.4	42060.9
P58389	1	1	48.48	Serine/threonine-protein phosphatase 2A activator OS=Mus musculus GN=Ppp2r4 =1 SV=1	Ppp2r4	414868	484713	489630	508225	0	0	0	0
Q3THG9	3	3	164.86	Alanyl-tRNA editing protein Aarsd1 OS=Mus musculus GN=Aarsd1 =1 SV=2	Aarsd1	414449	314745	436604	462984	0	0	0	0
O55060	1	1	38.95	Thiopurine S-methyltransferase OS=Mus musculus GN=Tpmt =1 SV=1	Tpmt	413927	443640	354089	416863	0	0	0	0
Q80U87	1	1	37.56	Ubiquitin carboxyl-terminal hydrolase 8 OS=Mus musculus GN=Usp8 =1 SV=2	Usp8	413770	353088	324903	21362.5	0	0	0	0
P81069	1	1	41.07	GA-binding protein subunit beta-2 OS=Mus musculus GN=Gabpb2 =1 SV=2	Gabpb2	413472	0	288588	0	0	0	0	0
Q00915	1	1	78.51	Retinol-binding protein 1 OS=Mus musculus GN=Rbp1 =1 SV=2	Rbp1	408944	396926	391430	448456	0	0	0	0
Q80WJ7	1	1	69.36	Protein LYRIC OS=Mus musculus GN=Mtdh =1 SV=1	Mtdh	408129	410610	326440	1.0812e+06	0	0	0	0
Q91VD9	2	2	100.61	NADH-ubiquinone oxidoreductase 75 kDa subunit, mitochondrial OS=Mus musculus GN=Ndufs1 =1 SV=2	Ndufs1	406867	411786	412196	439831	0	0	0	0
Q9CPP6	2	2	80.58	NADH dehydrogenase [ubiquinone] 1 alpha subcomplex subunit 5 OS=Mus musculus GN=Ndufa5 =1 SV=3	Ndufa5	404187	405853	402188	507162	0	0	0	0
P27601	1	1	38.78	Guanine nucleotide-binding protein subunit alpha-13 OS=Mus musculus GN=Gna13 =1 SV=1	Gna13	403706	352137	421407	416180	0	0	0	0
P16675	1	1	43.23	Lysosomal protective protein OS=Mus musculus GN=Ctsa PE=1 SV=1	Ctsa	401584	260075	368404	356964	0	0	0	0
Q9D9Z5	1	1	54.76	DET1- and DDB1-associated protein 1 OS=Mus musculus GN=Dda1 =1 SV=1	Dda1	400998	285825	272673	363243	0	0	0	0
Q9DBT9	1	1	48.24	Dimethylglycine dehydrogenase, mitochondrial OS=Mus musculus GN=Dmgdh =1 SV=1	Dmgdh	395978	332031	275358	336598	0	0	0	0
P97372	1	1	41.25	Proteasome activator complex subunit 2 OS=Mus musculus GN=Psme2 =1 SV=4	Psme2	395365	471236	405537	491384	0	0	0	0
Q91YN5	1	1	62.79	UDP-N-acetylhexosamine pyrophosphorylase OS=Mus musculus GN=Uap1 =1 SV=1	Uap1	394652	450761	432292	448976	0	0	0	0
Q9D2V7	2	2	97.6	Coronin-7 OS=Mus musculus GN=Coro7 =1 SV=2	Coro7	390564	477142	362092	443223	0	0	0	0
Q9WV54	1	1	57.3	Acid ceramidase OS=Mus musculus GN=Asah1 =1 SV=1	Asah1	387402	132201	168454	532945	410866	410866	398981	575401
Q9DCB8	2	2	102.59	Iron-sulfur cluster assembly 2 homolog, mitochondrial OS=Mus musculus GN=Isca2 =1 SV=2	Isca2	387123	427734	406350	438782	226426	226426	280750	242279
Q9QY15	1	1	55.92	ATP-dendent RNA helicase DDX25 OS=Mus musculus GN=Ddx25 =1 SV=2	Ddx25	387120	402012	422158	399546	0	0	0	0
Q9D868	1	1	45.86	ptidyl-prolyl cis-trans isomerase H OS=Mus musculus GN=Ppih =1 SV=1	Ppih	385244	454919	451507	606115	2.62998e+06	2.62998e+06	2.68632e+06	2.67199e+06
P70122	1	1	40.78	Ribosome maturation protein SBDS OS=Mus musculus GN=Sbds =1 SV=4	Sbds	383566	304758	371359	275268	118917	118917	442005	425977
Q6IRU2	3	3	192.46	Tropomyosin alpha-4 chain OS=Mus musculus GN=Tpm4 PE=1 SV=3	Tpm4	381959	366778	480972	424489	38838.9	38838.9	157380	159498
Q99LD4	2	2	126.88	COP9 signalosome complex subunit 1 OS=Mus musculus GN=Gps1 =1 SV=1	Gps1	379648	435130	364181	468003	0	0	0	0
Q62186	1	1	44.98	Translocon-associated protein subunit delta OS=Mus musculus GN=Ssr4 =1 SV=1	Ssr4	373601	403924	351197	439089	0	0	0	0
P43247	2	2	102.29	DNA mismatch repair protein Msh2 OS=Mus musculus GN=Msh2 =1 SV=1	Msh2	372271	579246	428454	643010	2.15758e+06	2.15758e+06	2.06451e+06	2.29824e+06
Q99MZ7	1	1	60.64	roxisomal trans-2-enoyl-CoA reductase OS=Mus musculus GN=cr =1 SV=1	cr	371012	495073	573440	1.30018e+06	0	0	0	0
Q8BU30	3	3	133.91	Isoleucine--tRNA ligase, cytoplasmic OS=Mus musculus GN=Iars =1 SV=2	Iars	370806	403207	354644	396126	436131	436131	429449	318630
Q9WVB0	1	1	75.46	RNA-binding protein with multiple splicing OS=Mus musculus GN=Rbpms =1 SV=2	Rbpms	369911	407299	307511	476404	7.18709e+06	7.18709e+06	6.80739e+06	6.6557e+06
Q8BIH0	4	4	171.43	Histone deacetylase complex subunit SAP130 OS=Mus musculus GN=Sap130 =1 SV=2	Sap130	369265	410621	380976	296028	2.25754e+06	2.25754e+06	3.66401e+06	3.8665e+06
Q8K2Z4	3	3	130.48	Condensin complex subunit 1 OS=Mus musculus GN=Ncapd2 =1 SV=2	Ncapd2	368882	333536	281053	280244	640856	640856	552459	532945
Q9EPU0	2	2	77.4	Regulator of nonsense transcripts 1 OS=Mus musculus GN=Upf1 =1 SV=2	Upf1	368758	379443	311608	382664	3.69469e+06	3.69469e+06	3.62489e+06	3.99107e+06
A2A8Z1	1	1	41.23	Oxysterol-binding protein-related protein 9 OS=Mus musculus GN=Osbpl9 =1 SV=1	Osbpl9	368589	359648	315194	473365	0	0	0	0
Q62470	2	2	90.95	Integrin alpha-3 OS=Mus musculus GN=Itga3 =1 SV=1	Itga3	365825	403598	339918	444406	0	0	0	0
Q08331	1	1	59.9	Calretinin OS=Mus musculus GN=Calb2 =1 SV=3	Calb2	362833	521073	353216	750483	0	0	0	0
Q8K1M6	2	2	121.85	Dynamin-1-like protein OS=Mus musculus GN=Dnm1l =1 SV=2	Dnm1l	362392	322281	360900	344670	0	0	0	0
Q569Z5	4	4	198.1	Probable ATP-dendent RNA helicase DDX46 OS=Mus musculus GN=Ddx46 =1 SV=2	Ddx46	362021	369157	452135	410272	3.38411e+06	3.38411e+06	2.12792e+06	2.14937e+06
Q9Z110	1	1	63.76	Delta-1-pyrroline-5-carboxylate synthase OS=Mus musculus GN=Aldh18a1 =1 SV=2	Aldh18a1	361098	349177	216264	288180	1.76235e+06	1.76235e+06	1.62745e+06	1.7779e+06
Q3UVK0	2	2	78.51	Endoplasmic reticulum metalloptidase 1 OS=Mus musculus GN=Ermp1 =1 SV=2	Ermp1	360373	387076	359689	422333	0	0	0	0
Q8VBT0	1	1	37.12	Thioredoxin-related transmembrane protein 1 OS=Mus musculus GN=Tmx1 =1 SV=1	Tmx1	357986	455094	339825	491097	0	0	0	0
A2BH40	4	4	193.7	AT-rich interactive domain-containing protein 1A OS=Mus musculus GN=Arid1a =1 SV=1	Arid1a	357244	177852	376887	428499	1.07693e+07	1.07693e+07	1.10827e+07	1.13666e+07
Q9Z0Y1	1	1	63.01	Dynactin subunit 3 OS=Mus musculus GN=Dctn3 =1 SV=2	Dctn3	354055	422650	383500	622202	0	0	0	0
Q6A026	1	1	61.15	Sister chromatid cohesion protein PDS5 homolog A OS=Mus musculus GN=Pds5a =1 SV=3	Pds5a	352484	280639	367260	335945	5.10583e+06	5.10583e+06	4.60668e+06	3.10889e+06
P28574	2	2	103.33	Protein max OS=Mus musculus GN=Max =1 SV=1	Max	350333	624691	437315	586479	3.96346e+06	3.96346e+06	2.87769e+06	2.8449e+06
O88455	1	1	42.77	7-dehydrocholesterol reductase OS=Mus musculus GN=Dhcr7 =1 SV=1	Dhcr7	350258	310297	349350	317149	0	0	0	0
Q8CGF7	2	2	94.39	Transcription elongation regulator 1 OS=Mus musculus GN=Tcerg1 =1 SV=2	Tcerg1	350255	426380	370480	445586	6.77408e+06	6.77408e+06	5.81374e+06	6.89179e+06
Q91WE3	3	3	138.56	Ribonuclease P protein subunit p25 OS=Mus musculus GN=Rpp25 =2 SV=1	Rpp25	349012	323293	291152	303205	1.21581e+06	1.21581e+06	1.51719e+06	897688
Q9WUP7	2	2	100.22	Ubiquitin carboxyl-terminal hydrolase isozyme L5 OS=Mus musculus GN=Uchl5 PE=1 SV=2	Uchl5	348276	585964	426226	591177	582218	582218	190490	0
Q9D2R0	2	2	99.23	Acetoacetyl-CoA synthetase OS=Mus musculus GN=Aacs =1 SV=1	Aacs	346338	280320	376299	307476	0	0	0	0
Q91WU5	2	2	98.28	Arsenite methyltransferase OS=Mus musculus GN=As3mt =1 SV=2	As3mt	344245	295980	272259	337146	0	0	0	0
P17710	2	2	95.89	Hexokinase-1 OS=Mus musculus GN=Hk1 =1 SV=3	Hk1	344075	350754	305846	341028	1.54138e+06	1.54138e+06	1.86697e+06	1.94715e+06
Q9CYA6	2	2	109.51	Zinc finger CCHC domain-containing protein 8 OS=Mus musculus GN=Zcchc8 =1 SV=3	Zcchc8	341533	601847	514187	406755	1.40983e+07	1.40983e+07	1.08145e+07	1.12697e+07
Q8BGH2	3	2	176.02	Sorting and assembly machinery component 50 homolog OS=Mus musculus GN=Samm50 =1 SV=1	Samm50	341505	290424	343649	550982	0	0	0	0
Q8K298	2	2	176.64	Anillin OS=Mus musculus GN=Anln =1 SV=2	Anln	340539	412266	514070	605290	792621	792621	849428	928131
Q8JZN5	1	1	73.21	Acyl-CoA dehydrogenase family member 9, mitochondrial OS=Mus musculus GN=Acad9 =1 SV=2	Acad9	340364	435477	474292	469224	0	0	0	0
Q3THK3	2	2	90.19	General transcription factor IIF subunit 1 OS=Mus musculus GN=Gtf2f1 =1 SV=2	Gtf2f1	337220	319099	900522	1.3409e+06	906409	906409	944136	755289
Q7TML3	1	1	76.69	Solute carrier family 35 member F2 OS=Mus musculus GN=Slc35f2 =1 SV=2	Slc35f2	335873	309371	397749	430566	0	0	0	0
Q62419	3	3	151.73	Endophilin-A2 OS=Mus musculus GN=Sh3gl1 =1 SV=1	Sh3gl1	335538	334200	297487	315796	0	0	0	0
Q8CGK3	3	3	159.98	Lon protease homolog, mitochondrial OS=Mus musculus GN=Lonp1 =1 SV=2	Lonp1	333895	432187	499351	605862	572495	572495	520716	458585
Q64514	1	1	41.52	Triptidyl-ptidase 2 OS=Mus musculus GN=Tpp2 =1 SV=3	Tpp2	331875	368020	280275	278383	1.72918e+06	1.72918e+06	2.26562e+06	1.36966e+06
Q9D0J4	1	1	39.41	ADP-ribosylation factor-like protein 2 OS=Mus musculus GN=Arl2 =1 SV=1	Arl2	330756	395842	329915	322912	0	0	0	0
Q8CEC6	2	2	84.54	ptidylprolyl isomerase domain and WD reat-containing protein 1 OS=Mus musculus GN=Ppwd1 =1 SV=2	Ppwd1	329715	250595	286788	290722	1.37082e+06	1.37082e+06	1.32029e+06	1.82389e+06
Q06138	1	1	40.08	Calcium-binding protein 39 OS=Mus musculus GN=Cab39 =1 SV=2	Cab39	326250	312104	359248	392432	0	0	0	0
Q921I9	2	2	106.47	Exosome complex component RRP41 OS=Mus musculus GN=Exosc4 =1 SV=3	Exosc4	324157	294004	290086	327769	309814	309814	618846	687958
Q9Z1P7	1	1	52.51	KN motif and ankyrin reat domain-containing protein 3 OS=Mus musculus GN=Kank3 =1 SV=1	Kank3	322348	324503	318014	262128	0	0	0	0
Q8BI84	1	1	45.39	Melanoma inhibitory activity protein 3 OS=Mus musculus GN=Mia3 =1 SV=2	Mia3	320979	323060	465626	374110	0	0	0	0
P32507	1	1	55.48	Nectin-2 OS=Mus musculus GN=Nectin2 =1 SV=2	Nectin2	320243	284775	281257	354114	1.41298e+06	1.41298e+06	1.28593e+06	1.37886e+06
Q8VE22	1	1	58.5	28S ribosomal protein S23, mitochondrial OS=Mus musculus GN=Mrps23 =1 SV=1	Mrps23	319474	388547	184334	275759	423316	423316	390041	497850
Q61187	1	1	44.07	Tumor susceptibility gene 101 protein OS=Mus musculus GN=Tsg101 =1 SV=2	Tsg101	318963	381382	328474	321385	0	0	0	0
Q6ZQL4	3	3	162.02	WD reat-containing protein 43 OS=Mus musculus GN=Wdr43 =2 SV=2	Wdr43	317780	629769	428334	495680	634123	634123	541438	540254
Q91X91	2	2	90.07	Nicotinate-nucleotide pyrophosphorylase [carboxylating] OS=Mus musculus GN=Qprt =1 SV=1	Qprt	316132	262118	202857	295540	0	0	0	0
Q11011	3	3	157.29	Puromycin-sensitive aminopeptidase OS=Mus musculus GN=Npepps PE=1 SV=2	Npepps	315370	305453	310227	322181	0	0	0	0
Q8CEC0	1	1	62.62	Nuclear pore complex protein Nup88 OS=Mus musculus GN=Nup88 =1 SV=1	Nup88	308610	337372	278968	330985	486511	486511	1.19145e+06	1.16591e+06
Q9CZ28	2	2	99.32	Vacuolar-sorting protein SNF8 OS=Mus musculus GN=Snf8 =1 SV=1	Snf8	308268	280058	201082	313615	0	0	0	0
Q8BUR4	1	1	43.32	Dedicator of cytokinesis protein 1 OS=Mus musculus GN=Dock1 =1 SV=3	Dock1	306608	445980	396037	373350	0	0	0	0
P30275	2	2	93.89	Creatine kinase U-ty, mitochondrial OS=Mus musculus GN=Ckmt1 =1 SV=1	Ckmt1	305542	2.4677e+06	3.2039e+06	2.54591e+06	2.43956e+06	2.43956e+06	2.23395e+06	1.72709e+06
P47758	1	1	36.52	Signal recognition particle receptor subunit beta OS=Mus musculus GN=Srprb =1 SV=1	Srprb	304089	184321	437756	415307	0	0	0	0
Q922H4	1	1	34.58	Mannose-1-phosphate guanyltransferase alpha OS=Mus musculus GN=Gmppa =1 SV=1	Gmppa	302602	263961	284214	252884	0	0	0	0
Q9CQ79	2	2	72.95	Thioredoxin domain-containing protein 9 OS=Mus musculus GN=Txndc9 PE=1 SV=1	Txndc9	300583	289448	312001	284814	0	0	0	0
Q8K4B0	1	1	40.47	Metastasis-associated protein MTA1 OS=Mus musculus GN=Mta1 =1 SV=1	Mta1	299045	293096	286497	306084	7.67805e+06	7.67805e+06	7.41054e+06	6.72952e+06
A2ABV5	1	1	47.66	Mediator of RNA polymerase II transcription subunit 14 OS=Mus musculus GN=Med14 =1 SV=1	Med14	298929	330306	320971	314994	0	0	0	51662.5
Q9CT10	2	2	94.97	Ran-binding protein 3 OS=Mus musculus GN=Ranbp3 =1 SV=2	Ranbp3	296613	475427	382287	680304	0	0	0	0
O88520	1	1	44.75	Leucine-rich reat protein SHOC-2 OS=Mus musculus GN=Shoc2 =1 SV=2	Shoc2	296554	317808	226400	532017	39420.8	39420.8	52595.6	13446.2
Q9D753	1	1	41.45	Exosome complex component RRP43 OS=Mus musculus GN=Exosc8 =1 SV=1	Exosc8	295906	224454	242065	169955	3.80572e+06	3.80572e+06	2.19628e+06	3.03608e+06
P42859	1	1	39.59	Huntingtin OS=Mus musculus GN=Htt =1 SV=2	Htt	295116	285405	204027	299364	4.90221e+06	4.90221e+06	523248	29980.6
P46718	1	1	43.45	Programmed cell death protein 2 OS=Mus musculus GN=Pdcd2 =2 SV=2	Pdcd2	294839	293230	261955	292374	0	0	0	0
Q9JHS3	2	2	90.84	Ragulator complex protein LAMTOR2 OS=Mus musculus GN=Lamtor2 =1 SV=1	Lamtor2	293787	292627	295256	380534	0	0	0	0
O09174	2	2	90.87	Alpha-methylacyl-CoA racemase OS=Mus musculus GN=Amacr =1 SV=4	Amacr	293718	267373	287728	370533	0	0	0	0
Q9CPV5	2	2	97.51	Polyamine-modulated factor 1 OS=Mus musculus GN=Pmf1 =1 SV=1	Pmf1	293127	292592	345864	312908	60258.9	60258.9	187133	49630.2
Q9CQX8	2	2	68.61	28S ribosomal protein S36, mitochondrial OS=Mus musculus GN=Mrps36 =1 SV=1	Mrps36	293027	371357	397127	432893	114406	114406	537757	503822
Q9WUA2	3	3	165.44	Phenylalanine--tRNA ligase beta subunit OS=Mus musculus GN=Farsb =1 SV=2	Farsb	291009	295579	332928	355113	2.53902e+06	2.53902e+06	2.15417e+06	1.71142e+06
Q99J47	1	1	40.02	Dehydrogenase/reductase SDR family member 7B OS=Mus musculus GN=Dhrs7b =1 SV=1	Dhrs7b	290072	311615	305574	324253	0	0	0	0
Q8R5M8	1	1	46.93	Cell adhesion molecule 1 OS=Mus musculus GN=Cadm1 =1 SV=2	Cadm1	289463	193168	206289	229432	0	0	0	0
A2RTL5	1	1	51.58	Arginine/serine-rich coiled-coil protein 2 OS=Mus musculus GN=Rsrc2 PE=2 SV=1	Rsrc2	289339	231748	478948	368890	0	0	0	0
P54823	2	2	89.35	Probable ATP-dendent RNA helicase DDX6 OS=Mus musculus GN=Ddx6 =1 SV=1	Ddx6	288657	366683	313165	384440	1.95243e+06	1.95243e+06	1.67858e+06	1.92021e+06
P21278	1	1	49.71	Guanine nucleotide-binding protein subunit alpha-11 OS=Mus musculus GN=Gna11 =1 SV=1	Gna11	288287	238953	281041	287643	0	0	0	0
P58468	1	1	45.76	Protein FAM207A OS=Mus musculus GN=Fam207a =1 SV=1	Fam207a	287551	357808	318453	406062	0	0	0	0
P17426	1	1	43.95	AP-2 complex subunit alpha-1 OS=Mus musculus GN=Ap2a1 =1 SV=1	Ap2a1	285807	223729	264910	294023	385253	385253	310045	278223
Q8BP27	1	1	40.65	Swi5-dendent recombination DNA repair protein 1 homolog OS=Mus musculus GN=Sfr1 =1 SV=2	Sfr1	281771	293540	282545	361620	0	0	0	0
Q8K4F5	1	1	72.71	Protein ABHD11 OS=Mus musculus GN=Abhd11 =1 SV=1	Abhd11	281377	275006	371807	319916	0	0	0	0
Q8VHN8	2	2	119.59	Protein syndesmos OS=Mus musculus GN=Nudt16l1 =1 SV=2	Nudt16l1	280104	227382	218676	299633	4.96922e+06	4.96922e+06	4.28131e+06	3.03875e+06
P51432	1	1	63.08	1-phosphatidylinositol 4,5-bisphosphate phosphodiesterase beta-3 OS=Mus musculus GN=Plcb3 =1 SV=2	Plcb3	280060	301402	283875	382830	250201	250201	237928	158996
Q9JM62	1	1	52.96	Receptor expression-enhancing protein 6 OS=Mus musculus GN=Reep6 =1 SV=1	Reep6	279533	254601	246859	319986	0	0	0	0
Q9R1C0	2	2	82.87	Transcription initiation factor TFIID subunit 7 OS=Mus musculus GN=Taf7 =1 SV=1	Taf7	278232	308387	285974	291126	0	0	0	0
P70698	1	1	42.14	CTP synthase 1 OS=Mus musculus GN=Ctps1 =1 SV=2	Ctps1	276447	272311	418773	386862	0	0	0	0
Q9D7I5	1	1	40.64	Phospholysine phosphohistidine inorganic pyrophosphate phosphatase OS=Mus musculus GN=Lhpp =1 SV=1	Lhpp	276447	195243	301940	271737	0	0	0	0
P53810	1	1	41.78	Phosphatidylinositol transfer protein alpha isoform OS=Mus musculus GN=Pitpna =1 SV=2	Pitpna	275792	322789	285534	337968	0	0	0	0
Q9Z120	2	2	86.51	tRNA (guanine-N(7)-)-methyltransferase OS=Mus musculus GN=Mettl1 =1 SV=1	Mettl1	273891	73293.5	207377	253616	0	0	0	0
Q8BI72	1	1	58.63	CDKN2A-interacting protein OS=Mus musculus GN=Cdkn2aip =1 SV=1	Cdkn2aip	272811	294207	214668	303634	988080	988080	1.14997e+06	686780
Q05CL8	2	2	82.75	La-related protein 7 OS=Mus musculus GN=Larp7 =1 SV=2	Larp7	272346	219420	288467	325120	1.61833e+06	1.61833e+06	1.19779e+06	852853
Q80VJ2	1	1	41.03	Steroid receptor RNA activator 1 OS=Mus musculus GN=Sra1 =1 SV=3	Sra1	271448	187079	174804	241544	0	0	0	0
Q80UM3	1	1	66.71	N-alpha-acetyltransferase 15, NatA auxiliary subunit OS=Mus musculus GN=Naa15 PE=1 SV=1	Naa15	269862	254793	241628	247515	21326.1	21326.1	137866	221282
Q8R2K1	1	1	55.95	Fucose mutarotase OS=Mus musculus GN=Fuom =1 SV=1	Fuom	268089	402420	410263	371149	0	0	0	0
Q8C3P7	1	1	57.65	N6-adenosine-methyltransferase subunit METTL3 OS=Mus musculus GN=Mettl3 =1 SV=2	Mettl3	266017	273339	250432	268389	0	0	0	0
Q62351	2	2	98.7	Transferrin receptor protein 1 OS=Mus musculus GN=Tfrc =1 SV=1	Tfrc	265977	372620	86191.8	41618.7	0	0	236864	363534
O35166	2	2	89.06	Golgi SNAP receptor complex member 2 OS=Mus musculus GN=Gosr2 =1 SV=2	Gosr2	264902	96154.6	240766	101013	0	0	0	0
Q6P5H2	2	2	139.22	Nestin OS=Mus musculus GN=Nes =1 SV=1	Nes	263753	363400	403607	508591	0	0	0	0
Q99PP7	1	1	60.88	E3 ubiquitin-protein ligase TRIM33 OS=Mus musculus GN=Trim33 =1 SV=2	Trim33	260185	247946	214892	249449	609902	609902	448230	269198
P48432	1	1	44.45	Transcription factor SOX-2 OS=Mus musculus GN=Sox2 =1 SV=2	Sox2	258939	424628	832609	717120	9.58546e+06	9.58546e+06	9.55146e+06	1.23027e+07
Q8CFI2	1	1	39	Ubiquitin-conjugating enzyme E2 R1 OS=Mus musculus GN=Cdc34 =1 SV=1	Cdc34	258376	251435	183087	241735	0	0	0	0
Q9D0F9	2	2	105.19	Phosphoglucomutase-1 OS=Mus musculus GN=Pgm1 =1 SV=4	Pgm1	258130	315337	277770	268759	0	0	0	0
Q9D620	1	1	46.04	Rab11 family-interacting protein 1 OS=Mus musculus GN=Rab11fip1 =1 SV=2	Rab11fip1	255325	163149	100435	188161	0	0	0	0
Q7TMR0	1	1	50.91	Lysosomal Pro-X carboxypeptidase OS=Mus musculus GN=Prcp PE=1 SV=2	Prcp	253849	219073	206156	532095	0	0	0	0
Q8BH74	1	1	46.16	Nuclear pore complex protein Nup107 OS=Mus musculus GN=Nup107 =1 SV=1	Nup107	252167	222959	271081	271034	486398	486398	319502	467221
Q8C4B4	1	1	43.53	Protein unc-119 homolog B OS=Mus musculus GN=Unc119b =1 SV=1	Unc119b	251015	300536	324963	296775	0	0	0	0
Q7TNP2	1	1	57.48	Serine/threonine-protein phosphatase 2A 65 kDa regulatory subunit A beta isoform OS=Mus musculus GN=Ppp2r1b =1 SV=2	Ppp2r1b	251014	248438	206854	279874	0	0	0	0
P49717	1	1	47.83	DNA replication licensing factor MCM4 OS=Mus musculus GN=Mcm4 =1 SV=1	Mcm4	250858	276113	259735	227076	9.56688e+06	9.56688e+06	1.06274e+07	1.01951e+07
Q9DC50	1	1	38.04	roxisomal carnitine O-octanoyltransferase OS=Mus musculus GN=Crot =1 SV=1	Crot	249137	218035	175946	179050	0	0	0	0
Q8BTS4	3	3	146.8	Nuclear pore complex protein Nup54 OS=Mus musculus GN=Nup54 =1 SV=1	Nup54	248669	402287	248805	346349	2.27198e+06	2.27198e+06	2.16403e+06	2.14107e+06
Q9WV96	1	1	33.18	Mitochondrial import inner membrane translocase subunit Tim10 B OS=Mus musculus GN=Timm10b =1 SV=1	Timm10b	246013	296274	203231	331899	55062.4	55062.4	146839	0
Q3V3R4	1	1	55.19	Integrin alpha-1 OS=Mus musculus GN=Itga1 =1 SV=2	Itga1	244422	232604	132135	175346	0	0	0	0
Q9D720	1	1	53.05	Non-structural maintenance of chromosomes element 1 homolog OS=Mus musculus GN=Nsmce1 =1 SV=1	Nsmce1	241173	217667	270304	322277	1.85173e+06	1.85173e+06	1.99421e+06	1.89455e+06
P0CG14	1	1	44.26	Chromosome transmission fidelity protein 8 homolog isoform 2 OS=Mus musculus GN=Chtf8 =1 SV=1	Chtf8	240339	216271	241895	249139	0	0	0	0
Q9ET26	2	2	99.03	E3 ubiquitin-protein ligase RNF114 OS=Mus musculus GN=Rnf114 =1 SV=2	Rnf114	239735	348260	309701	371945	0	0	0	0
Q8R361	1	1	50.1	Rab11 family-interacting protein 5 OS=Mus musculus GN=Rab11fip5 =1 SV=2	Rab11fip5	239386	175436	273642	256724	0	0	0	0
Q3UGS4	1	1	59.85	Mapk-regulated corepressor-interacting protein 1 OS=Mus musculus GN=Mcrip1 =1 SV=1	Mcrip1	237452	208382	126295	267320	0	0	0	0
Q62276	1	1	34.45	Mediator of RNA polymerase II transcription subunit 22 OS=Mus musculus GN=Med22 =1 SV=2	Med22	237120	195042	188146	209697	139276	139276	247259	164516
Q9DC61	1	1	59.64	Mitochondrial-processing ptidase subunit alpha OS=Mus musculus GN=Pmpca =1 SV=1	Pmpca	235239	324192	205194	308145	1.53748e+06	1.53748e+06	859553	622524
Q7TSC1	1	1	37.45	Protein PRRC2A OS=Mus musculus GN=Prrc2a =1 SV=1	Prrc2a	234189	294753	276539	270972	0	0	0	0
Q9JK92	2	2	111.78	Heat shock protein beta-8 OS=Mus musculus GN=Hspb8 =1 SV=1	Hspb8	232392	254783	212082	250150	0	0	0	0
O88746	1	1	50.72	Target of Myb protein 1 OS=Mus musculus GN=Tom1 =1 SV=1	Tom1	231951	243954	166411	246024	256611	256611	299345	312561
Q91VR5	2	2	81.47	ATP-dendent RNA helicase DDX1 OS=Mus musculus GN=Ddx1 =1 SV=1	Ddx1	231476	232787	230334	257691	2.02366e+06	2.02366e+06	2.11138e+06	2.41347e+06
O55111	1	1	38.84	Desmoglein-2 OS=Mus musculus GN=Dsg2 =1 SV=3	Dsg2	229981	228446	160922	7341.64	0	0	0	0
Q99KQ4	1	1	31.97	Nicotinamide phosphoribosyltransferase OS=Mus musculus GN=Nampt =1 SV=1	Nampt	228812	214308	242985	235220	0	0	0	0
Q9D211	1	1	39.66	CDKN2AIP N-terminal-like protein OS=Mus musculus GN=Cdkn2aipnl =3 SV=1	Cdkn2aipnl	228405	214089	213348	269960	561237	561237	516931	405864
Q9CYD3	1	1	40.4	Cartilage-associated protein OS=Mus musculus GN=Crtap =1 SV=3	Crtap	227318	209573	153092	204714	0	0	0	0
P63037	2	2	155.95	DnaJ homolog subfamily A member 1 OS=Mus musculus GN=Dnaja1 =1 SV=1	Dnaja1	227226	290017	566587	510584	474342	474342	712314	423815
Q9D0I9	2	2	79.79	Arginine--tRNA ligase, cytoplasmic OS=Mus musculus GN=Rars =1 SV=2	Rars	225688	187841	196908	250109	854367	854367	1.22262e+06	944022
P41216	1	1	49.98	Long-chain-fatty-acid--CoA ligase 1 OS=Mus musculus GN=Acsl1 =1 SV=2	Acsl1	224944	206841	195036	209536	0	0	0	0
O35286	1	1	43.34	Pre-mRNA-splicing factor ATP-dendent RNA helicase DHX15 OS=Mus musculus GN=Dhx15 =1 SV=2	Dhx15	224122	204389	219251	187955	6.84872e+06	6.84872e+06	6.87452e+06	6.55155e+06
Q9WUD8	1	1	42.97	Fas apoptotic inhibitory molecule 1 OS=Mus musculus GN=Faim =1 SV=1	Faim	221991	288716	186722	199973	0	0	0	0
Q9ER69	1	1	38.02	Pre-mRNA-splicing regulator WTAP OS=Mus musculus GN=Wtap =1 SV=3	Wtap	219443	346375	287762	200972	818052	818052	957095	731408
Q9DCC4	1	1	49.96	Pyrroline-5-carboxylate reductase 3 OS=Mus musculus GN=Pycrl =1 SV=2	Pycrl	217264	197749	224543	241180	0	0	0	0
P31324	2	2	93.83	cAMP-dendent protein kinase ty II-beta regulatory subunit OS=Mus musculus GN=Prkar2b =1 SV=3	Prkar2b	216866	225995	212664	235984	312717	312717	317386	355588
Q61749	1	1	67.61	Translation initiation factor eIF-2B subunit delta OS=Mus musculus GN=Eif2b4 =1 SV=2	Eif2b4	216843	266341	185198	263267	0	0	0	0
P98083	1	1	43.55	SHC-transforming protein 1 OS=Mus musculus GN=Shc1 =1 SV=3	Shc1	213575	253418	264013	196334	0	0	0	0
Q8R2U4	1	1	29.79	N-terminal Xaa-Pro-Lys N-methyltransferase 1 OS=Mus musculus GN=Ntmt1 =1 SV=3	Ntmt1	213426	176136	238037	191334	821469	821469	1.32087e+06	1.35757e+06
Q5SSI6	1	1	57.43	U3 small nucleolar RNA-associated protein 18 homolog OS=Mus musculus GN=Utp18 =1 SV=1	Utp18	212821	154952	135192	182821	0	0	0	0
Q6DFW4	2	2	90.92	Nucleolar protein 58 OS=Mus musculus GN=Nop58 =1 SV=1	Nop58	211738	142054	311631	220234	577441	577441	540494	443340
Q6A4J8	2	2	79.52	Ubiquitin carboxyl-terminal hydrolase 7 OS=Mus musculus GN=Usp7 =1 SV=1	Usp7	211004	228451	217022	240003	1.37387e+06	1.37387e+06	2.14896e+06	1.45023e+06
P62838	1	1	46.49	Ubiquitin-conjugating enzyme E2 D2 OS=Mus musculus GN=Ube2d2 =1 SV=1	Ube2d2	209117	145081	72714.9	118204	0	0	0	0
D3Z7P3	1	1	45.87	Glutaminase kidney isoform, mitochondrial OS=Mus musculus GN=Gls =1 SV=1	Gls	208766	201051	135141	162966	540987	540987	336399	290089
Q9R1C7	1	1	41.46	Pre-mRNA-processing factor 40 homolog A OS=Mus musculus GN=Prpf40a =1 SV=1	Prpf40a	207713	289768	208036	206010	1.10857e+07	1.10857e+07	9.16893e+06	9.06942e+06
Q8K0G5	1	1	52.82	Protein TSSC1 OS=Mus musculus GN=Eipr1 =1 SV=2	Eipr1	207713	192833	183595	303922	0	0	0	0
Q9CXG3	1	1	42.84	ptidyl-prolyl cis-trans isomerase-like 4 OS=Mus musculus GN=Ppil4 =1 SV=2	Ppil4	206264	263107	267020	267031	1.19668e+06	1.19668e+06	1.24507e+06	1.285e+06
Q4FK66	1	1	41.21	Pre-mRNA-splicing factor 38A OS=Mus musculus GN=Prpf38a =1 SV=1	Prpf38a	204670	188178	154030	187177	8428.09	8428.09	121956	134830
Q810V0	1	1	46.49	U3 small nucleolar ribonucleoprotein protein MPP10 OS=Mus musculus GN=Mphosph10 =1 SV=2	Mphosph10	204301	192849	230694	220581	0	0	0	0
Q921V5	1	1	32.08	Alpha-1,6-mannosyl-glycoprotein 2-beta-N-acetylglucosaminyltransferase OS=Mus musculus GN=Mgat2 =1 SV=1	Mgat2	201311	313182	192854	168623	0	0	0	0
Q811D0	2	2	136.44	Disks large homolog 1 OS=Mus musculus GN=Dlg1 =1 SV=1	Dlg1	200283	211660	254715	187116	1.69706e+06	1.69706e+06	2.23023e+06	1.995e+06
Q06180	1	1	42.04	Tyrosine-protein phosphatase non-receptor ty 2 OS=Mus musculus GN=Ptpn2 =1 SV=2	Ptpn2	199760	167547	177498	179731	0	0	0	0
Q8R127	1	1	43.24	Saccharopine dehydrogenase-like oxidoreductase OS=Mus musculus GN=Sccpdh =1 SV=1	Sccpdh	198374	247991	214963	233442	0	0	0	0
P24527	1	1	49.09	Leukotriene A-4 hydrolase OS=Mus musculus GN=Lta4h =1 SV=4	Lta4h	197511	166329	150863	180759	0	0	0	0
P0C0A3	1	1	51.46	Charged multivesicular body protein 6 OS=Mus musculus GN=Chmp6 =1 SV=2	Chmp6	194457	281213	291035	298373	0	0	0	0
O35621	1	1	38.58	Phosphomannomutase 1 OS=Mus musculus GN=Pmm1 =1 SV=1	Pmm1	192667	127993	127594	135617	0	0	0	0
Q8K1J6	1	1	55.22	CCA tRNA nucleotidyltransferase 1, mitochondrial OS=Mus musculus GN=Trnt1 PE=1 SV=1	Trnt1	192153	183772	189634	160943	96885.9	96885.9	86719.8	0
Q9D0A3	2	2	107.4	Arpin OS=Mus musculus GN=Arpin =1 SV=1	Arpin	191991	61596.9	68145.1	327981	0	0	0	0
Q8R5F3	1	1	43.57	O-acetyl-ADP-ribose deacetylase 1 OS=Mus musculus GN=Oard1 =1 SV=2	Oard1	191349	192127	184223	188737	510471	510471	470127	448816
Q7TQ95	1	1	45.11	Protein lunapark OS=Mus musculus GN=Lnp =1 SV=1	Lnp	189245	237550	246835	263058	0	0	0	0
Q9D338	1	1	38.27	39S ribosomal protein L19, mitochondrial OS=Mus musculus GN=Mrpl19 =1 SV=1	Mrpl19	183035	199150	204230	245970	0	0	0	0
P68037	1	1	91.3	Ubiquitin-conjugating enzyme E2 L3 OS=Mus musculus GN=Ube2l3 PE=1 SV=1	Ube2l3	182302	2857.55	165864	169269	0	0	0	0
Q9EQQ9	2	2	92.81	Protein O-GlcNAcase OS=Mus musculus GN=Mgea5 PE=1 SV=2	Mgea5	181328	181536	0	0	0	0	0	0
A2AGT5	3	3	126.78	Cytoskeleton-associated protein 5 OS=Mus musculus GN=Ckap5 =1 SV=1	Ckap5	180761	227985	128097	208353	5.039e+06	5.039e+06	4.67289e+06	3.62199e+06
P55194	1	1	42.65	SH3 domain-binding protein 1 OS=Mus musculus GN=Sh3bp1 =1 SV=2	Sh3bp1	178952	29716.7	180930	22955.9	352444	352444	404138	423680
P12265	1	1	49.15	Beta-glucuronidase OS=Mus musculus GN=Gusb =1 SV=2	Gusb	178384	197699	175350	217586	0	0	0	0
P50136	1	1	41.49	2-oxoisovalerate dehydrogenase subunit alpha, mitochondrial OS=Mus musculus GN=Bckdha =1 SV=1	Bckdha	177108	163457	133961	114974	0	0	0	0
Q6PIJ4	1	1	37.19	Nuclear factor related to kappa-B-binding protein OS=Mus musculus GN=Nfrkb =1 SV=1	Nfrkb	176387	134801	168236	216779	953295	953295	688098	621560
Q69ZN7	1	1	45.93	Myoferlin OS=Mus musculus GN=Myof =1 SV=2	Myof	176100	211775	249111	204244	0	0	0	0
Q8CHY6	1	1	43.73	Transcriptional repressor p66 alpha OS=Mus musculus GN=Gatad2a =1 SV=2	Gatad2a	175584	214618	156953	192503	9.1365e+06	9.1365e+06	1.01053e+07	1.15736e+07
Q9Z2D8	2	2	89.96	Methyl-CpG-binding domain protein 3 OS=Mus musculus GN=Mbd3 =1 SV=1	Mbd3	175555	100502	144791	171267	4.7961e+06	4.7961e+06	4.3499e+06	9.25481e+06
Q8BWT1	1	1	57.8	3-ketoacyl-CoA thiolase, mitochondrial OS=Mus musculus GN=Acaa2 =1 SV=3	Acaa2	173780	203135	239708	182003	1.79043e+06	1.79043e+06	2.24188e+06	1.99078e+06
Q2VPQ9	1	1	43.82	Chromatin modification-related protein MEAF6 OS=Mus musculus GN=Meaf6 =1 SV=1	Meaf6	173651	113835	204091	122443	307305	307305	386382	229225
Q64373	1	1	44.98	Bcl-2-like protein 1 OS=Mus musculus GN=Bcl2l1 =1 SV=1	Bcl2l1	172910	184800	183833	248529	0	0	0	0
Q8R3N6	1	1	46.01	THO complex subunit 1 OS=Mus musculus GN=Thoc1 =1 SV=1	Thoc1	172876	236188	195674	278772	658973	658973	497369	436361
Q8VHR5	4	4	193.54	Transcriptional repressor p66-beta OS=Mus musculus GN=Gatad2b =1 SV=1	Gatad2b	171972	93290.9	129285	163831	6.67687e+06	6.67687e+06	7.97608e+06	1.27544e+07
Q8BG81	1	1	40.61	Polymerase delta-interacting protein 3 OS=Mus musculus GN=Poldip3 =1 SV=1	Poldip3	171270	274969	385823	316308	2.39806e+06	2.39806e+06	2.22924e+06	2.10828e+06
P97355	1	1	38.08	Srmine synthase OS=Mus musculus GN=Sms =1 SV=1	Sms	170619	156651	157814	196124	0	0	0	0
Q8BX22	4	4	207.65	Sal-like protein 4 OS=Mus musculus GN=Sall4 =1 SV=2	Sall4	169912	183677	174222	681428	2.47912e+07	2.47912e+07	2.20022e+07	2.1775e+07
Q60767	3	3	126.18	Lymphocyte antigen 75 OS=Mus musculus GN=Ly75 =1 SV=2	Ly75	165718	169521	132552	169906	0	0	0	0
O88712	1	1	42.49	C-terminal-binding protein 1 OS=Mus musculus GN=Ctbp1 =1 SV=2	Ctbp1	165406	169138	129393	117273	450946	450946	564311	484826
P97792	1	1	53.58	Coxsackievirus and adenovirus receptor homolog OS=Mus musculus GN=Cxadr =1 SV=1	Cxadr	163942	1954.06	145792	187584	0	0	0	0
P97364	1	1	41.02	Selenide, water dikinase 2 OS=Mus musculus GN=Sephs2 =1 SV=3	Sephs2	162680	157555	162479	173393	0	0	0	0
Q7TT37	2	2	98.89	Elongator complex protein 1 OS=Mus musculus GN=Ikbkap =1 SV=2	Ikbkap	162678	170103	170289	198963	6958.27	6958.27	10202.1	0
Q8R3N1	1	1	41.35	Nucleolar protein 14 OS=Mus musculus GN=Nop14 =1 SV=2	Nop14	161206	161259	161560	157623	0	0	0	0
Q9D1R2	1	1	43.78	Protein KTI12 homolog OS=Mus musculus GN=Kti12 =1 SV=1	Kti12	159633	304461	371725	450877	0	0	0	0
Q9ERR1	2	2	112.55	Nuclear distribution protein nudE-like 1 OS=Mus musculus GN=Ndel1 =1 SV=2	Ndel1	159455	108424	131244	152874	79220.2	79220.2	68195.9	81190.5
Q9D495	1	1	47.54	Synaptonemal complex central element protein 1 OS=Mus musculus GN=Syce1 =1 SV=1	Syce1	157519	136378	152450	137059	0	0	0	0
Q615	1	1	71.28	Mycophenolic acid acyl-glucuronide esterase, mitochondrial OS=Mus musculus GN=Abhd10 =1 SV=1	Abhd10	154093	127395	120189	200585	0	0	0	0
Q9Z1T1	1	1	45.95	AP-3 complex subunit beta-1 OS=Mus musculus GN=Ap3b1 =1 SV=2	Ap3b1	153785	216065	140897	196028	0	0	0	0
Q9CZG9	1	1	56.46	PDZ domain-containing protein 11 OS=Mus musculus GN=Pdzd11 =1 SV=1	Pdzd11	153154	206719	142024	158990	0	0	0	0
Q9CR23	1	1	41.26	Transmembrane protein 9 OS=Mus musculus GN=Tmem9 =1 SV=1	Tmem9	152082	185058	227643	331907	0	0	0	0
Q9DC33	1	1	42.25	High mobility group protein 20A OS=Mus musculus GN=Hmg20a =1 SV=1	Hmg20a	151422	138139	233154	255147	603450	603450	668115	1.1135e+06
Q5PSV9	1	1	32.71	Mediator of DNA damage checkpoint protein 1 OS=Mus musculus GN=Mdc1 =1 SV=1	Mdc1	151405	108010	124096	92901.1	2.46456e+07	2.46456e+07	1.85057e+07	1.39266e+07
O08553	1	1	48.32	Dihydropyrimidinase-related protein 2 OS=Mus musculus GN=Dpysl2 =1 SV=2	Dpysl2	150721	152603	137659	213428	0	0	0	0
Q8K0D5	1	1	49.68	Elongation factor G, mitochondrial OS=Mus musculus GN=Gfm1 =1 SV=1	Gfm1	148924	110406	91186.5	224328	983727	983727	737788	686040
Q9QZ88	1	1	40.38	Vacuolar protein sorting-associated protein 29 OS=Mus musculus GN=Vps29 =1 SV=1	Vps29	147554	200805	183100	202766	344449	344449	623848	506243
Q91X20	1	1	39.74	Set1/Ash2 histone methyltransferase complex subunit ASH2 OS=Mus musculus GN=Ash2l =1 SV=1	Ash2l	147446	180389	167070	157568	2.55695e+06	2.55695e+06	2.09404e+06	2.78245e+06
P17809	1	1	43.86	Solute carrier family 2, facilitated glucose transporter member 1 OS=Mus musculus GN=Slc2a1 =1 SV=4	Slc2a1	147050	103414	163202	4138.31	0	0	0	0
Q8C5H8	1	1	35.58	NAD kinase 2, mitochondrial OS=Mus musculus GN=Nadk2 =1 SV=2	Nadk2	146438	156142	65774.9	0	164953	164953	246767	201083
P11930	2	2	100.1	Nucleoside diphosphate-linked moiety X motif 19 OS=Mus musculus GN=Nudt19 =1 SV=2	Nudt19	145129	170518	124252	46111.7	0	0	0	0
Q9CRT8	1	1	47.01	Exportin-T OS=Mus musculus GN=Xpot =1 SV=3	Xpot	144430	149355	156057	192910	0	0	0	0
Q9D5R4	1	1	48.42	Srmatogenesis-associated protein 1 OS=Mus musculus GN=Spata1 =2 SV=1	Spata1	144059	144754	163524	132550	80904.4	80904.4	46473	68651.3
Q9DBE9	1	1	56.22	pre-rRNA processing protein FTSJ3 OS=Mus musculus GN=Ftsj3 =1 SV=1	Ftsj3	143681	160529	153085	174284	0	0	0	0
Q3TIX9	1	1	41.46	U4/U6.U5 tri-snRNP-associated protein 2 OS=Mus musculus GN=Usp39 =1 SV=2	Usp39	142518	122339	102556	133206	4.26616e+06	4.26616e+06	4.1832e+06	2.29698e+06
Q5XJY5	1	1	48.16	Coatomer subunit delta OS=Mus musculus GN=Arcn1 =1 SV=2	Arcn1	141882	537861	917512	600900	383079	383079	859476	154637
P48678	3	3	142.45	Prelamin-A/C OS=Mus musculus GN=Lmna =1 SV=2	Lmna	140847	133187	166839	120734	66979.7	66979.7	38057.3	54493.5
Q80Y81	1	1	51.69	Zinc phosphodiesterase ELAC protein 2 OS=Mus musculus GN=Elac2 =1 SV=1	Elac2	140361	160106	126123	130096	0	0	0	0
Q8JZM7	1	1	52.52	Parafibromin OS=Mus musculus GN=Cdc73 =1 SV=1	Cdc73	139385	444551	17034.2	12427.2	67914.5	67914.5	512584	555668
P28843	1	1	39.53	Diptidyl ptidase 4 OS=Mus musculus GN=Dpp4 =1 SV=3	Dpp4	138191	80430.5	109838	19425.4	0	0	0	0
Q8K3Y3	1	1	46.67	Protein lin-28 homolog A OS=Mus musculus GN=Lin28a =1 SV=1	Lin28a	137682	86298.9	59249.3	27994.5	4.44719e+06	4.44719e+06	4.30258e+06	7.05992e+06
O88531	1	1	39.63	Palmitoyl-protein thioesterase 1 OS=Mus musculus GN=Ppt1 =1 SV=2	Ppt1	137321	249731	172691	249495	0	0	0	0
Q9D4H8	3	3	125.97	Cullin-2 OS=Mus musculus GN=Cul2 =1 SV=2	Cul2	137169	149459	262973	283885	0	0	0	0
Q8BU03	1	1	45.29	riodic tryptophan protein 2 homolog OS=Mus musculus GN=Pwp2 =1 SV=1	Pwp2	136514	94002.1	129917	109395	0	0	0	0
Q91YR7	1	1	50.45	Pre-mRNA-processing factor 6 OS=Mus musculus GN=Prpf6 =1 SV=1	Prpf6	136421	133995	219215	300285	3.04515e+06	3.04515e+06	3.08247e+06	2.39673e+06
Q925I1	1	1	66.95	ATPase family AAA domain-containing protein 3 OS=Mus musculus GN=Atad3 =1 SV=1	Atad3	135698	150130	140879	157305	0	0	0	0
Q9D7N9	1	1	60.06	Adipocyte plasma membrane-associated protein OS=Mus musculus GN=Apmap =1 SV=1	Apmap	134127	124639	76067.5	79989.9	0	0	0	0
Q8K409	1	1	43.89	DNA polymerase beta OS=Mus musculus GN=Polb =1 SV=3	Polb	133660	274343	368110	70397.7	1.62787e+06	1.62787e+06	1.4776e+06	1.36875e+06
Q7JJ13	1	1	29.22	Bromodomain-containing protein 2 OS=Mus musculus GN=Brd2 =1 SV=1	Brd2	131596	27055.9	131256	180225	679619	679619	1.06604e+06	1.46192e+06
Q60838	1	1	37.31	Segment polarity protein dishevelled homolog DVL-2 OS=Mus musculus GN=Dvl2 =1 SV=2	Dvl2	131287	69079.9	60593.6	28773.2	0	0	0	0
Q9EQ61	2	2	81.66	scadillo homolog OS=Mus musculus GN=s1 =1 SV=1	s1	130476	146856	138800	146183	2.37763e+06	2.37763e+06	1.89752e+06	1.34898e+06
Q8BNU0	1	1	48.31	Armadillo reat-containing protein 6 OS=Mus musculus GN=Armc6 =1 SV=1	Armc6	127162	131773	111341	159667	0	0	0	0
Q61334	1	1	46.32	B-cell receptor-associated protein 29 OS=Mus musculus GN=Bcap29 =1 SV=1	Bcap29	123784	112093	138142	140803	0	0	0	0
Q8VC85	2	2	82.51	U6 snRNA-associated Sm-like protein LSm1 OS=Mus musculus GN=Lsm1 =1 SV=1	Lsm1	123074	211705	79337.3	99451.8	10423.4	10423.4	302107	715993
B7ZMP1	1	1	43.98	Probable Xaa-Pro aminoptidase 3 OS=Mus musculus GN=Xpnp3 =1 SV=1	Xpnp3	122862	97975.9	188293	164287	104785	104785	85540.1	74994.3
Q9DBC7	1	1	38.47	cAMP-dendent protein kinase ty I-alpha regulatory subunit OS=Mus musculus GN=Prkar1a =1 SV=3	Prkar1a	122367	114111	92063.2	126749	0	0	0	0
Q8JZQ2	1	1	39.28	AFG3-like protein 2 OS=Mus musculus GN=Afg3l2 =1 SV=1	Afg3l2	119407	78802.6	570.162	62750.6	0	0	0	0
P58059	1	1	42.95	28S ribosomal protein S21, mitochondrial OS=Mus musculus GN=Mrps21 =1 SV=1	Mrps21	117936	167886	118310	111846	0	0	0	0
Q8R3V5	1	1	40.18	Endophilin-B2 OS=Mus musculus GN=Sh3glb2 =1 SV=2	Sh3glb2	117664	130882	78967.9	104781	0	0	0	0
Q3UMU9	2	2	80.7	Hepatoma-derived growth factor-related protein 2 OS=Mus musculus GN=Hdgfrp2 =1 SV=1	Hdgfrp2	116472	125583	264712	113970	994971	994971	1.05392e+06	1.04838e+06
Q8R1S0	1	1	30.43	Ubiquinone biosynthesis monooxygenase COQ6, mitochondrial OS=Mus musculus GN=Coq6 =1 SV=3	Coq6	114402	57282.2	169416	230754	31619.7	31619.7	1.22795e+06	1.37533e+06
Q91VN4	1	1	36.9	MICOS complex subunit Mic25 OS=Mus musculus GN=Chchd6 =1 SV=2	Chchd6	113340	135127	95710.3	208129	0	0	0	0
Q63739	1	1	39.83	Protein tyrosine phosphatase ty IVA 1 OS=Mus musculus GN=Ptp4a1 =1 SV=1	Ptp4a1	111420	186399	165795	208872	0	0	0	0
Q9D6T0	1	1	41.67	Nitric oxide synthase-interacting protein OS=Mus musculus GN=Nosip =1 SV=1	Nosip	111273	123282	75979.1	123882	49630.2	49630.2	112527	146292
Q9CQI6	1	1	30.76	Coactosin-like protein OS=Mus musculus GN=Cotl1 =1 SV=3	Cotl1	110387	100862	0	0	0	0	0	0
Q9D1M7	1	1	41.82	ptidyl-prolyl cis-trans isomerase FKBP11 OS=Mus musculus GN=Fkbp11 =1 SV=1	Fkbp11	108940	127924	116739	24234.8	0	0	0	0
O35136	1	1	36.5	Neural cell adhesion molecule 2 OS=Mus musculus GN=Ncam2 =1 SV=1	Ncam2	108937	149197	123965	109834	130644	130644	102219	64174
Q8BU04	1	1	49.78	Putative E3 ubiquitin-protein ligase UBR7 OS=Mus musculus GN=Ubr7 =1 SV=1	Ubr7	108843	139452	118356	141552	0	0	0	0
Q9CPR8	1	1	44.63	Non-structural maintenance of chromosomes element 3 homolog OS=Mus musculus GN=Nsmce3 =1 SV=1	Nsmce3	106244	65409.4	69907	68093.5	565575	565575	626527	643601
Q922E4	1	1	41.34	Ethanolamine-phosphate cytidylyltransferase OS=Mus musculus GN=Pcyt2 =1 SV=1	Pcyt2	105734	86141.7	95590.2	133657	0	0	0	0
B1ARW8	1	1	52.52	Uncharacterized protein C1orf122 homolog OS=Mus musculus =4 SV=1	4SV	105419	130652	46568.4	152036	0	0	0	0
Q9QXS1	3	3	174.9	Plectin OS=Mus musculus GN=Plec =1 SV=3	Plec	103371	246367	195072	262858	496463	496463	659977	698769
Q8CE96	1	1	44.43	tRNA (adenine(58)-N(1))-methyltransferase non-catalytic subunit TRM6 OS=Mus musculus GN=Trmt6 =1 SV=1	Trmt6	102905	132293	152477	177022	0	0	0	0
Q148V7	1	1	46.8	LisH domain and HEAT reat-containing protein KIAA1468 OS=Mus musculus GN=Kiaa1468 =1 SV=1	Kiaa1468	102655	149033	99790	89029.3	0	0	0	0
P48036	1	1	63.77	Annexin A5 OS=Mus musculus GN=Anxa5 =1 SV=1	Anxa5	102102	106507	94736	107516	0	0	0	0
Q99LM2	1	1	50.68	CDK5 regulatory subunit-associated protein 3 OS=Mus musculus GN=Cdk5rap3 =1 SV=1	Cdk5rap3	102087	256.76	76039.7	82449.6	18588.4	18588.4	74094.7	11844.7
Q9CR59	1	1	45.65	Growth arrest and DNA damage-inducible proteins-interacting protein 1 OS=Mus musculus GN=Gadd45gip1 =1 SV=1	Gadd45gip1	101353	197896	204467	226570	0	0	0	0
Q9CQA5	2	2	89.45	Mediator of RNA polymerase II transcription subunit 4 OS=Mus musculus GN=Med4 =2 SV=1	Med4	97938.6	118896	81197.9	112177	319596	319596	261105	291978
Q920Q2	1	1	48.85	DNA repair protein REV1 OS=Mus musculus GN=Rev1 =1 SV=1	Rev1	96766.8	67018.2	5134.32	103547	0	0	0	0
P62915	1	1	45.08	Transcription initiation factor IIB OS=Mus musculus GN=Gtf2b =1 SV=1	Gtf2b	95531	95973.9	82740.2	105020	1.0117e+06	1.0117e+06	1.00957e+06	1.18971e+06
Q9QX47	1	1	41.16	Protein SON OS=Mus musculus GN=Son =1 SV=2	Son	92697.8	136788	107985	4848.49	423034	423034	375102	872027
P97386	1	1	37.22	DNA ligase 3 OS=Mus musculus GN=Lig3 =1 SV=2	Lig3	90064.2	86515.6	1453.48	935.738	3.06136e+06	3.06136e+06	2.56684e+06	2.86677e+06
Q61136	1	1	49.67	Serine/threonine-protein kinase PRP4 homolog OS=Mus musculus GN=Prpf4b =1 SV=3	Prpf4b	84498.3	72915.5	89668.6	89249	885953	885953	809280	748485
Q9WV35	1	1	41.62	C->U-editing enzyme APOBEC-2 OS=Mus musculus GN=Apobec2 PE=1 SV=1	Apobec2	83114.3	88442.9	96975.9	103446	0	0	0	0
Q9CXT8	1	1	41.24	Mitochondrial-processing ptidase subunit beta OS=Mus musculus GN=Pmpcb =1 SV=1	Pmpcb	83050.9	57594.1	0	0	273733	273733	423440	291825
Q80UY1	1	1	48.01	Carnosine N-methyltransferase OS=Mus musculus GN=Carnmt1 =1 SV=1	Carnmt1	80870	161458	354542	549993	0	0	0	0
Q3TFQ1	1	1	38.17	SPRY domain-containing protein 7 OS=Mus musculus GN=Spryd7 =1 SV=2	Spryd7	78121.4	32830.1	54170	12717.8	0	0	0	0
Q9ESX5	2	2	83.69	H/ACA ribonucleoprotein complex subunit 4 OS=Mus musculus GN=Dkc1 =1 SV=4	Dkc1	77337.5	448981	429864	364378	2.06917e+06	2.06917e+06	2.26536e+06	2.15279e+06
Q5SQX6	1	1	41.31	Cytoplasmic FMR1-interacting protein 2 OS=Mus musculus GN=Cyfip2 =1 SV=2	Cyfip2	76809.3	122241	102355	117691	0	0	0	145366
P09803	1	1	33.1	Cadherin-1 OS=Mus musculus GN=Cdh1 =1 SV=1	Cdh1	74995	290745	410412	343744	7.93084e+06	7.93084e+06	6.63912e+06	5.41582e+06
Q61879	2	2	119.9	Myosin-10 OS=Mus musculus GN=Myh10 =1 SV=2	Myh10	73982	254061	236394	277606	0	0	0	0
Q9CW03	1	1	38.76	Structural maintenance of chromosomes protein 3 OS=Mus musculus GN=Smc3 =1 SV=2	Smc3	67341.6	36988.7	65477	95727.3	1.45632e+07	1.45632e+07	1.5126e+07	1.73625e+07
Q8R507	1	1	36.8	Fukutin OS=Mus musculus GN=Fktn =2 SV=1	Fktn	66101.9	106444	2360.94	129.167	0	0	0	0
Q9JKP7	1	1	51.64	DNA polymerase epsilon subunit 3 OS=Mus musculus GN=Pole3 =1 SV=1	Pole3	64388.7	1.27878e+06	864874	113328	456588	456588	377726	367084
Q9WV32	1	1	39.09	Actin-related protein 2/3 complex subunit 1B OS=Mus musculus GN=Arpc1b =1 SV=4	Arpc1b	63822.5	78216.5	99047.4	94688.7	663154	663154	479721	230967
Q8CCP0	1	1	40.09	Nuclear export mediator factor Nemf OS=Mus musculus GN=Nemf =1 SV=2	Nemf	63421.4	154883	175188	117868	164902	164902	244348	225114
Q9D0D4	1	1	58.63	Probable dimethyladenosine transferase OS=Mus musculus GN=Dimt1 =2 SV=1	Dimt1	62670	58683.7	33121.3	45694.4	184094	184094	179532	152461
Q9CZH3	1	1	35.55	Proteasome assembly charone 3 OS=Mus musculus GN=Psmg3 =1 SV=1	Psmg3	61892.4	85843.5	2562.15	6094.73	2.54239e+06	2.54239e+06	1.2379e+06	0
Q3TLS3	2	2	78.37	GDP-D-glucose phosphorylase 1 OS=Mus musculus GN=Gdpgp1 =1 SV=2	Gdpgp1	60876.6	93688.3	115873	87410.9	0	0	0	0
Q9D8Z2	1	1	38.75	TP53-regulated inhibitor of apoptosis 1 OS=Mus musculus GN=Triap1 =1 SV=1	Triap1	60716.7	237655	286716	342446	677435	677435	614013	637469
Q920D3	1	1	42.23	Mediator of RNA polymerase II transcription subunit 28 OS=Mus musculus GN=Med28 =1 SV=2	Med28	60190.3	74394.2	63547.6	65436	0	0	0	0
Q9CZU3	1	1	51.72	Surkiller viralicidic activity 2-like 2 OS=Mus musculus GN=Skiv2l2 =1 SV=1	Skiv2l2	54705.5	0	39674.1	0	4.16722e+06	4.16722e+06	3.19032e+06	3.52818e+06
Q9QXZ0	2	2	94.18	Microtubule-actin cross-linking factor 1 OS=Mus musculus GN=Macf1 =1 SV=2	Macf1	51290.1	48499.3	60002	81726.7	200501	200501	369718	392347
Q8VBV3	1	1	44.97	Exosome complex component RRP4 OS=Mus musculus GN=Exosc2 =1 SV=1	Exosc2	50530.1	16346.5	12164.8	48533.5	403489	403489	273207	716485
Q9ERU9	1	1	58.07	E3 SUMO-protein ligase RanBP2 OS=Mus musculus GN=Ranbp2 =1 SV=2	Ranbp2	50281.4	67940.8	8531.53	104512	1.20454e+06	1.20454e+06	1.08283e+06	1.06146e+06
Q9ERG2	1	1	45.16	Striatin-3 OS=Mus musculus GN=Strn3 =1 SV=1	Strn3	49882.9	76646	32230.9	63456.6	0	0	0	0
Q5U4C3	1	1	47.04	Splicing factor, arginine/serine-rich 19 OS=Mus musculus GN=Scaf1 =1 SV=1	Scaf1	46477.8	67733.7	55852.5	54679.3	0	0	0	0
Q80X41	1	1	41	Serine/threonine-protein kinase VRK1 OS=Mus musculus GN=Vrk1 =1 SV=2	Vrk1	44122.8	44523.3	21746	60922.8	6.07785e+06	6.07785e+06	5.88096e+06	1.06188e+07
Q9DBR3	1	1	39.98	Armadillo reat-containing protein 8 OS=Mus musculus GN=Armc8 =1 SV=2	Armc8	38095.6	38003.2	4502.22	33042.7	0	0	0	0
Q9Z2X2	1	1	45.48	26S proteasome non-ATPase regulatory subunit 10 OS=Mus musculus GN=Psmd10 PE=1 SV=3	Psmd10	36424.2	46381.1	48358.8	53448.2	0	0	0	0
Q99JW2	1	1	39.83	Aminoacylase-1 OS=Mus musculus GN=Acy1 =1 SV=1	Acy1	34598.6	41342.2	44674.7	65840.9	0	0	0	0
Q9EQ80	1	1	41.64	NIF3-like protein 1 OS=Mus musculus GN=Nif3l1 =1 SV=4	Nif3l1	32356	59005.3	20476.1	65752.1	0	0	0	0
Q91VW3	1	1	55.48	SH3 domain-binding glutamic acid-rich-like protein 3 OS=Mus musculus GN=Sh3bgrl3 =1 SV=1	Sh3bgrl3	31252.2	774751	1.92608e+06	687253	0	0	0	0
P83510	1	1	33.08	Traf2 and NCK-interacting protein kinase OS=Mus musculus GN=Tnik =1 SV=2	Tnik	27582.3	71139.5	33451.9	33166.4	0	0	0	0
P36536	1	1	50.38	GTP-binding protein SAR1a OS=Mus musculus GN=Sar1a =1 SV=1	Sar1a	25896.1	64601.2	57156.4	102471	0	0	0	0
Q9D1Q6	2	1	109.92	Endoplasmic reticulum resident protein 44 OS=Mus musculus GN=Erp44 =1 SV=1	Erp44	24335.4	169918	255114	121958	84081.3	84081.3	148708	178704
P41105	1	1	50.11	60S ribosomal protein L28 OS=Mus musculus GN=Rpl28 PE=1 SV=2	Rpl28	23959.2	54832.9	229996	48778.9	0	0	0	0
Q6ZQ08	1	1	53.2	CCR4-NOT transcription complex subunit 1 OS=Mus musculus GN=Cnot1 =1 SV=2	Cnot1	19649.7	78377	31231.3	94894.2	1.30755e+06	1.30755e+06	1.35211e+06	1.34807e+06
Q9CY16	1	1	39.43	28S ribosomal protein S28, mitochondrial OS=Mus musculus GN=Mrps28 =1 SV=1	Mrps28	16930.9	76689	67068.7	3362.38	614944	614944	412603	671915
Q923X4	1	1	39.04	Glutaredoxin-2, mitochondrial OS=Mus musculus GN=Glrx2 =1 SV=1	Glrx2	16221.5	29361.2	36291.5	17225.9	0	0	0	0
Q8BKX1	1	1	40.54	Brain-scific angiogenesis inhibitor 1-associated protein 2 OS=Mus musculus GN=Baiap2 =1 SV=2	Baiap2	16127.9	38436.8	52408.3	6775.13	0	0	0	0
Q8BMS1	1	1	30.19	Trifunctional enzyme subunit alpha, mitochondrial OS=Mus musculus GN=Hadha =1 SV=1	Hadha	9967.07	648256	776023	20762.1	849800	849800	707709	758422
Q61941	1	1	46.85	NAD(P) transhydrogenase, mitochondrial OS=Mus musculus GN=Nnt =1 SV=2	Nnt	9819.65	93213.5	84850.9	78251.1	0	0	0	0
Q64127	1	1	38.85	Transcription intermediary factor 1-alpha OS=Mus musculus GN=Trim24 =1 SV=1	Trim24	9580.31	55331	48020.8	23488.3	9.32244e+06	9.32244e+06	1.09418e+07	1.1783e+07
Q9EQI8	1	1	38.46	39S ribosomal protein L46, mitochondrial OS=Mus musculus GN=Mrpl46 =1 SV=1	Mrpl46	6405.5	0	53505.8	80501.3	715182	715182	658581	691342
Q8VDI7	1	1	66.45	Ubiquitin-associated domain-containing protein 1 OS=Mus musculus GN=Ubac1 =1 SV=2	Ubac1	5243.73	56585.6	85288.5	155820	0	0	0	0
Q5NBX1	1	1	46.56	Protein cordon-bleu OS=Mus musculus GN=Cobl =1 SV=1	Cobl	2746.55	9148.37	123164	193214	1.26986e+06	1.26986e+06	1.16848e+06	1.26524e+06
Q8VCM8	1	1	45.69	Nicalin OS=Mus musculus GN=Ncln =1 SV=2	Ncln	2325.99	79890.7	97334.9	4601.44	0	0	0	0
Q9DBS1	1	1	32.6	Transmembrane protein 43 OS=Mus musculus GN=Tmem43 =1 SV=1	Tmem43	1960.82	0	147088	162870	0	0	0	0
Q0P678	1	1	50.1	Zinc finger CCCH domain-containing protein 18 OS=Mus musculus GN=Zc3h18 =1 SV=1	Zc3h18	1225.14	198203	233923	184934	689401	689401	603834	698739
Q9D820	1	1	42.3	Prolyl-tRNA synthetase associated domain-containing protein 1 OS=Mus musculus GN=Prorsd1 =1 SV=1	Prorsd1	693.455	3201.34	192750	165603	0	0	0	0
Q9CU62	51	51	3465.44	Structural maintenance of chromosomes protein 1A OS=Mus musculus GN=Smc1a PE=1 SV=4	Smc1a	0	0	0	0	8.87663e+06	8.87663e+06	8.88765e+06	9.51419e+06
Q01320	47	47	3281.37	DNA topoisomerase 2-alpha OS=Mus musculus GN=Top2a PE=1 SV=2	Top2a	0	0	0	0	1.87957e+07	1.87957e+07	1.88521e+07	1.64414e+07
Q3TKT4	36	36	2894.34	Transcription activator BRG1 OS=Mus musculus GN=Smarca4 PE=1 SV=1	Smarca4	0	0	0	0	1.53611e+07	1.53611e+07	1.32016e+07	1.65156e+07
Q61033	21	21	1928.5	Lamina-associated polypeptide 2, isoforms alpha/zeta OS=Mus musculus GN=Tmpo PE=1 SV=4	Tmpo	0	0	0	0	1.55323e+07	1.55323e+07	2.2065e+07	1.95397e+07
A2AWL7	32	32	1836.64	MAX gene-associated protein OS=Mus musculus GN=Mga PE=2 SV=1	Mga	0	0	0	0	1.91153e+06	1.91153e+06	3.14598e+06	3.64227e+06
Q91YE5	31	31	1833.07	Bromodomain adjacent to zinc finger domain protein 2A OS=Mus musculus GN=Baz2a PE=1 SV=2	Baz2a	0	0	0	0	5.91919e+06	5.91919e+06	7.22935e+06	7.67993e+06
Q4VA53	26	24	1728.89	Sister chromatid cohesion protein PDS5 homolog B OS=Mus musculus GN=Pds5b PE=1 SV=1	Pds5b	0	0	0	0	1.02553e+07	1.02553e+07	9.32406e+06	1.07664e+07
P97496	27	27	1687.27	SWI/SNF complex subunit SMARCC1 OS=Mus musculus GN=Smarcc1 PE=1 SV=2	Smarcc1	0	0	0	0	2.0307e+07	2.0307e+07	3.02981e+07	3.5466e+07
Q8C854	21	21	1648.95	Myelin expression factor 2 OS=Mus musculus GN=Myef2 PE=1 SV=1	Myef2	0	0	0	0	3.04408e+07	3.04408e+07	3.04443e+07	3.35939e+07
Q61466	26	26	1646.51	SWI/SNF-related matrix-associated actin-dependent regulator of chromatin subfamily D member 1 OS=Mus musculus GN=Smarcd1 PE=1 SV=3	Smarcd1	0	0	0	0	1.71269e+07	1.71269e+07	1.4013e+07	1.43758e+07
Q80U70	23	23	1569.71	Polycomb protein Suz12 OS=Mus musculus GN=Suz12 PE=1 SV=2	Suz12	0	0	0	0	1.48979e+07	1.48979e+07	1.62969e+07	1.4585e+07
Q8VDJ3	24	24	1563.54	Vigilin OS=Mus musculus GN=Hdlbp PE=1 SV=1	Hdlbp	0	0	0	0	8.60849e+06	8.60849e+06	6.50911e+06	7.70369e+06
Q04750	23	23	1424.44	DNA topoisomerase 1 OS=Mus musculus GN=Top1 PE=1 SV=2	Top1	0	0	0	0	1.25103e+07	1.25103e+07	1.38188e+07	7.75257e+06
Q5SF07	19	18	1313.53	Insulin-like growth factor 2 mRNA-binding protein 2 OS=Mus musculus GN=Igf2bp2 PE=1 SV=1	Igf2bp2	0	0	0	0	1.20325e+07	1.20325e+07	1.1326e+07	1.01662e+07
O88532	19	19	1302.44	Zinc finger RNA-binding protein OS=Mus musculus GN=Zfr PE=1 SV=2	Zfr	0	0	0	0	8.11839e+06	8.11839e+06	7.01769e+06	7.01515e+06
Q3V300	19	19	1294.17	Kinesin-like protein KIF22 OS=Mus musculus GN=Kif22 PE=2 SV=2	Kif22	0	0	0	0	3.68385e+06	3.68385e+06	3.91001e+06	4.87483e+06
Q8BSQ9	24	24	1263.5	Protein polybromo-1 OS=Mus musculus GN=Pbrm1 PE=1 SV=4	Pbrm1	0	0	0	0	3.12043e+06	3.12043e+06	3.07907e+06	1.77741e+06
Q62095	18	16	1221.19	ATP-dependent RNA helicase DDX3Y OS=Mus musculus GN=Ddx3y PE=1 SV=2	Ddx3y	0	0	0	0	1.25407e+07	1.25407e+07	1.34407e+07	1.95937e+07
A2APB8	18	18	1181.49	Targeting protein for Xklp2 OS=Mus musculus GN=Tpx2 PE=1 SV=1	Tpx2	0	0	0	0	4.34202e+06	4.34202e+06	4.70022e+06	3.14582e+06
P08775	20	20	1152.04	DNA-directed RNA polymerase II subunit RPB1 OS=Mus musculus GN=Polr2a PE=1 SV=3	Polr2a	0	0	0	0	4.63001e+06	4.63001e+06	3.69786e+06	4.23309e+06
Q9D3E6	21	19	1149.43	Cohesin subunit SA-1 OS=Mus musculus GN=Stag1 PE=1 SV=3	Stag1	0	0	0	0	3.9113e+06	3.9113e+06	4.85062e+06	5.24702e+06
Q9ER74	18	17	1109.07	Sal-like protein 1 OS=Mus musculus GN=Sall1 PE=1 SV=1	Sall1	0	0	0	0	9.55721e+06	9.55721e+06	8.86106e+06	8.47824e+06
Q61990	14	14	1088.89	Poly(rC)-binding protein 2 OS=Mus musculus GN=Pcbp2 PE=1 SV=1	Pcbp2	0	0	0	0	8.79288e+07	8.79288e+07	7.11885e+07	7.28668e+07
Q91WM1	16	15	1025.79	Spermatid perinuclear RNA-binding protein OS=Mus musculus GN=Strbp PE=1 SV=1	Strbp	0	0	0	0	4.96734e+06	4.96734e+06	5.05148e+06	5.14613e+06
Q9JLV6	15	15	966.97	Bifunctional polynucleotide phosphatase/kinase OS=Mus musculus GN=Pnkp PE=1 SV=2	Pnkp	0	0	0	0	2.33308e+06	2.33308e+06	2.418e+06	3.35593e+06
Q9Z130	12	11	950.14	Heterogeneous nuclear ribonucleoprotein D-like OS=Mus musculus GN=Hnrnpdl PE=1 SV=1	Hnrnpdl	0	0	0	0	3.12183e+07	3.12183e+07	3.32005e+07	1.64621e+07
Q8CH18	17	17	939.68	Cell division cycle and apoptosis regulator protein 1 OS=Mus musculus GN=Ccar1 PE=1 SV=1	Ccar1	0	0	0	0	7.52819e+06	7.52819e+06	7.1719e+06	8.66194e+06
Q6PE01	14	14	938.78	U5 small nuclear ribonucleoprotein 40 kDa protein OS=Mus musculus GN=Snrnp40 PE=1 SV=1	Snrnp40	0	0	0	0	1.47304e+07	1.47304e+07	1.3797e+07	1.75092e+07
Q8CGP2	11	11	929.96	Histone H2B type 1-P OS=Mus musculus GN=Hist1h2bp PE=1 SV=3	Hist1h2bp	0	0	0	0	0	0	0	0
P27048	11	11	926.73	Small nuclear ribonucleoprotein-associated protein B OS=Mus musculus GN=Snrpb PE=1 SV=1	Snrpb	0	0	0	0	6.33004e+07	6.33004e+07	7.95819e+07	7.55907e+07
P70388	17	16	912.72	DNA repair protein RAD50 OS=Mus musculus GN=Rad50 PE=1 SV=1	Rad50	0	0	0	0	1.65479e+06	1.65479e+06	1.59199e+06	1.81357e+06
Q8K327	14	14	886.72	Chromosome alignment-maintaining phosphoprotein 1 OS=Mus musculus GN=Champ1 PE=1 SV=1	Champ1	0	0	0	0	3.41143e+06	3.41143e+06	2.9988e+06	3.30632e+06
Q9EPU4	15	15	877.1	Cleavage and polyadenylation specificity factor subunit 1 OS=Mus musculus GN=Cpsf1 PE=1 SV=1	Cpsf1	0	0	0	0	1.55163e+06	1.55163e+06	1.70359e+06	1.78466e+06
P23249	15	15	865.01	Putative helicase MOV-10 OS=Mus musculus GN=Mov10 PE=1 SV=2	Mov10	0	0	0	0	2.3074e+06	2.3074e+06	2.59536e+06	2.39814e+06
Q921E6	13	13	848.66	Polycomb protein EED OS=Mus musculus GN=Eed PE=1 SV=1	Eed	0	0	0	0	3.29893e+06	3.29893e+06	3.43025e+06	4.29591e+06
P70399	13	13	821.85	Tumor suppressor p53-binding protein 1 OS=Mus musculus GN=Tp53bp1 PE=1 SV=2	Tp53bp1	0	0	0	0	3.84654e+06	3.84654e+06	3.04762e+06	1.64535e+06
Q99KG3	10	10	813.26	RNA-binding protein 10 OS=Mus musculus GN=Rbm10 PE=1 SV=1	Rbm10	0	0	0	0	4.27867e+06	4.27867e+06	3.11068e+06	1.66475e+06
Q91Z31	14	12	811.7	Polypyrimidine tract-binding protein 2 OS=Mus musculus GN=Ptbp2 PE=1 SV=2	Ptbp2	0	0	0	0	8.14057e+06	8.14057e+06	7.29404e+06	7.27271e+06
Q922S8	14	14	805.74	Kinesin-like protein KIF2C OS=Mus musculus GN=Kif2c PE=1 SV=1	Kif2c	0	0	0	0	6.65003e+06	6.65003e+06	8.74246e+06	1.11593e+07
P56959	9	9	801.89	RNA-binding protein FUS OS=Mus musculus GN=Fus PE=1 SV=1	Fus	0	0	0	0	1.01042e+08	1.01042e+08	1.07799e+08	8.98527e+07
Q6P5D8	16	16	794.38	Structural maintenance of chromosomes flexible hinge domain-containing protein 1 OS=Mus musculus GN=Smchd1 PE=1 SV=2	Smchd1	0	0	0	0	2.2494e+06	2.2494e+06	2.32148e+06	2.11487e+06
Q3UH06	15	15	789.73	Ras-responsive element-binding protein 1 OS=Mus musculus GN=Rreb1 PE=1 SV=2	Rreb1	0	0	0	0	2.88759e+06	2.88759e+06	3.45346e+06	1.98615e+06
Q8BHD7	7	7	748.37	Polypyrimidine tract-binding protein 3 OS=Mus musculus GN=Ptbp3 PE=1 SV=1	Ptbp3	0	0	0	0	9.63197e+06	9.63197e+06	8.10778e+06	4.69998e+06
Q61188	12	12	747.77	Histone-lysine N-methyltransferase EZH2 OS=Mus musculus GN=Ezh2 PE=1 SV=2	Ezh2	0	0	0	0	5.23265e+06	5.23265e+06	4.90848e+06	5.82786e+06
Q3V0C5	14	13	747.27	Ubiquitin carboxyl-terminal hydrolase 48 OS=Mus musculus GN=Usp48 PE=1 SV=2	Usp48	0	0	0	0	3.21528e+06	3.21528e+06	4.08909e+06	4.04428e+06
Q6NZN0	14	14	725.3	RNA-binding protein 26 OS=Mus musculus GN=Rbm26 PE=1 SV=2	Rbm26	0	0	0	0	1.85496e+06	1.85496e+06	1.72838e+06	1.74429e+06
D3YXK2	11	11	708.6	Scaffold attachment factor B1 OS=Mus musculus GN=Safb PE=1 SV=2	Safb	0	0	0	0	9.24537e+06	9.24537e+06	7.65364e+06	8.88184e+06
Q64524	9	9	708.37	Histone H2B type 2-E OS=Mus musculus GN=Hist2h2be PE=1 SV=3	Hist2h2be	0	0	0	0	2.23141e+09	2.23141e+09	2.03022e+09	2.14227e+09
O35638	12	10	705.11	Cohesin subunit SA-2 OS=Mus musculus GN=Stag2 PE=1 SV=3	Stag2	0	0	0	0	3.0131e+06	3.0131e+06	2.89111e+06	2.28163e+06
Q8CHI8	13	13	692.76	E1A-binding protein p400 OS=Mus musculus GN=Ep400 PE=1 SV=3	Ep400	0	0	0	0	956579	956579	1.05094e+06	1.12746e+06
P68433	9	9	691.59	Histone H3.1 OS=Mus musculus GN=Hist1h3a PE=1 SV=2	Hist1h3a	0	0	0	0	9.05624e+08	9.05624e+08	7.44605e+08	8.03453e+08
Q8CGY8	14	14	688.22	UDP-N-acetylglucosamine--peptide N-acetylglucosaminyltransferase 110 kDa subunit OS=Mus musculus GN=Ogt PE=1 SV=2	Ogt	0	0	0	0	999792	999792	1.28915e+06	1.08113e+06
Q8BZH4	13	13	675.12	Pogo transposable element with ZNF domain OS=Mus musculus GN=Pogz PE=1 SV=2	Pogz	0	0	0	0	2.46299e+06	2.46299e+06	2.40681e+06	1.55805e+06
Q6ZQ58	12	11	658.9	La-related protein 1 OS=Mus musculus GN=Larp1 PE=1 SV=3	Larp1	0	0	0	0	2.12774e+06	2.12774e+06	1.93871e+06	1.97877e+06
Q6P542	10	10	655.09	ATP-binding cassette sub-family F member 1 OS=Mus musculus GN=Abcf1 PE=1 SV=1	Abcf1	0	0	0	0	1.08137e+07	1.08137e+07	1.06837e+07	9.43352e+06
Q8C5Q4	9	9	653.01	G-rich sequence factor 1 OS=Mus musculus GN=Grsf1 PE=1 SV=2	Grsf1	0	0	0	0	3.66184e+06	3.66184e+06	3.94874e+06	2.17355e+06
Q6NZF1	12	12	648.37	Zinc finger CCCH domain-containing protein 11A OS=Mus musculus GN=Zc3h11a PE=1 SV=1	Zc3h11a	0	0	0	0	4.63999e+06	4.63999e+06	4.7514e+06	3.89737e+06
Q8C9B9	12	12	644.65	Death-inducer obliterator 1 OS=Mus musculus GN=Dido1 PE=1 SV=4	Dido1	0	0	0	0	1.80633e+06	1.80633e+06	1.62146e+06	1.59005e+06
Q921F4	9	9	642.49	Heterogeneous nuclear ribonucleoprotein L-like OS=Mus musculus GN=Hnrnpll PE=1 SV=3	Hnrnpll	0	0	0	0	3.38699e+06	3.38699e+06	2.43809e+06	2.4892e+06
Q8C5L7	9	9	639.08	RNA-binding protein 34 OS=Mus musculus GN=Rbm34 PE=1 SV=1	Rbm34	0	0	0	0	0	0	0	0
Q80Y84	12	12	637.24	Lysine-specific demethylase 5B OS=Mus musculus GN=Kdm5b PE=1 SV=1	Kdm5b	0	0	0	0	829553	829553	817011	906738
P48377	8	8	633.21	MHC class II regulatory factor RFX1 OS=Mus musculus GN=Rfx1 PE=1 SV=2	Rfx1	0	0	0	0	1.78757e+06	1.78757e+06	1.47384e+06	1.31294e+06
Q9Z0H3	10	10	629.35	SWI/SNF-related matrix-associated actin-dependent regulator of chromatin subfamily B member 1 OS=Mus musculus GN=Smarcb1 PE=1 SV=1	Smarcb1	0	0	0	0	1.31225e+07	1.31225e+07	1.21283e+07	1.06871e+07
P59997	11	11	609.85	Lysine-specific demethylase 2A OS=Mus musculus GN=Kdm2a PE=1 SV=2	Kdm2a	0	0	0	0	2.17515e+06	2.17515e+06	2.44078e+06	2.47841e+06
Q3UYV9	11	11	601.25	Nuclear cap-binding protein subunit 1 OS=Mus musculus GN=Ncbp1 PE=1 SV=2	Ncbp1	0	0	0	0	4.60269e+06	4.60269e+06	3.94973e+06	4.88164e+06
O35134	11	11	598.59	DNA-directed RNA polymerase I subunit RPA1 OS=Mus musculus GN=Polr1a PE=1 SV=2	Polr1a	0	0	0	0	2.49175e+06	2.49175e+06	2.28021e+06	2.21067e+06
O35295	9	9	597.88	Transcriptional activator protein Pur-beta OS=Mus musculus GN=Purb PE=1 SV=3	Purb	0	0	0	0	1.73628e+06	1.73628e+06	1.74899e+06	2.26421e+06
Q8K2F0	9	9	589.88	Bromodomain-containing protein 3 OS=Mus musculus GN=Brd3 PE=1 SV=2	Brd3	0	0	0	0	8.8689e+06	8.8689e+06	7.77607e+06	5.9852e+06
Q9QWT9	10	10	589.8	Kinesin-like protein KIFC1 OS=Mus musculus GN=Kifc1 PE=1 SV=2	Kifc1	0	0	0	0	2.96207e+06	2.96207e+06	1.94577e+06	1.22856e+06
P33174	10	10	585.65	Chromosome-associated kinesin KIF4 OS=Mus musculus GN=Kif4 PE=1 SV=3	Kif4	0	0	0	0	1.22839e+06	1.22839e+06	1.06113e+06	1.21717e+06
Q9WTX8	9	9	583.85	Mitotic spindle assembly checkpoint protein MAD1 OS=Mus musculus GN=Mad1l1 PE=1 SV=1	Mad1l1	0	0	0	0	2.29488e+06	2.29488e+06	2.26811e+06	1.1163e+06
Q9Z103	8	8	557.9	Activity-dependent neuroprotector homeobox protein OS=Mus musculus GN=Adnp PE=1 SV=2	Adnp	0	0	0	0	1.57141e+06	1.57141e+06	1.46761e+06	1.47165e+06
Q8CG48	10	10	554.85	Structural maintenance of chromosomes protein 2 OS=Mus musculus GN=Smc2 PE=1 SV=2	Smc2	0	0	0	0	1.33093e+06	1.33093e+06	1.65387e+06	1.94588e+06
Q3V1H1	9	9	550.75	Cytoskeleton-associated protein 2 OS=Mus musculus GN=Ckap2 PE=1 SV=1	Ckap2	0	0	0	0	1.60442e+06	1.60442e+06	1.61597e+06	1.47476e+06
Q9JI44	11	11	550.31	DNA methyltransferase 1-associated protein 1 OS=Mus musculus GN=Dmap1 PE=1 SV=1	Dmap1	0	0	0	0	2.6514e+06	2.6514e+06	2.81513e+06	536847
Q8VDP4	10	10	533.97	Cell cycle and apoptosis regulator protein 2 OS=Mus musculus GN=Ccar2 PE=1 SV=2	Ccar2	0	0	0	0	3.36704e+06	3.36704e+06	4.43558e+06	5.14289e+06
Q8BR65	9	9	530.09	Sin3 histone deacetylase corepressor complex component SDS3 OS=Mus musculus GN=Suds3 PE=1 SV=1	Suds3	0	0	0	0	1.81742e+06	1.81742e+06	1.68659e+06	2.23303e+06
Q80WE4	8	8	525.56	Kinesin-like protein KIF20B OS=Mus musculus GN=Kif20b PE=1 SV=3	Kif20b	0	0	0	0	905753	905753	797475	845697
Q8BFQ4	7	7	521.43	WD repeat-containing protein 82 OS=Mus musculus GN=Wdr82 PE=1 SV=1	Wdr82	0	0	0	0	3.69738e+06	3.69738e+06	4.3403e+06	4.22105e+06
Q9QYB5	9	9	514.32	Gamma-adducin OS=Mus musculus GN=Add3 PE=1 SV=2	Add3	0	0	0	0	3.04059e+06	3.04059e+06	2.0711e+06	2.41755e+06
Q7TPD0	8	8	506.19	Integrator complex subunit 3 OS=Mus musculus GN=Ints3 PE=1 SV=2	Ints3	0	0	0	0	1.88059e+06	1.88059e+06	1.80369e+06	4.21351e+06
Q8CFI7	9	9	504.28	DNA-directed RNA polymerase II subunit RPB2 OS=Mus musculus GN=Polr2b PE=1 SV=2	Polr2b	0	0	0	0	1.39185e+06	1.39185e+06	1.4052e+06	1.26659e+06
P35601	9	9	490.41	Replication factor C subunit 1 OS=Mus musculus GN=Rfc1 PE=1 SV=2	Rfc1	0	0	0	0	962279	962279	904845	1.71064e+06
Q65Z40	9	9	488.94	Wings apart-like protein homolog OS=Mus musculus GN=Wapl PE=1 SV=2	Wapl	0	0	0	0	2.49611e+06	2.49611e+06	2.43106e+06	2.63375e+06
P15864	5	5	488.66	Histone H1.2 OS=Mus musculus GN=Hist1h1c PE=1 SV=2	Hist1h1c	0	0	0	0	0	0	0	0
Q69ZR9	10	10	487.98	Protein TASOR OS=Mus musculus GN=Fam208a PE=1 SV=2	Fam208a	0	0	0	0	1.33595e+06	1.33595e+06	1.17393e+06	1.09757e+06
Q61655	8	8	483.96	ATP-dependent RNA helicase DDX19A OS=Mus musculus GN=Ddx19a PE=1 SV=2	Ddx19a	0	0	0	0	1.56701e+06	1.56701e+06	1.83542e+06	1.89123e+06
Q6P4S8	9	9	482.72	Integrator complex subunit 1 OS=Mus musculus GN=Ints1 PE=1 SV=2	Ints1	0	0	0	0	1.41767e+06	1.41767e+06	389139	519767
Q8K284	9	8	481.68	General transcription factor 3C polypeptide 1 OS=Mus musculus GN=Gtf3c1 PE=1 SV=2	Gtf3c1	0	0	0	0	724465	724465	642040	744217
Q80YV3	10	10	472.09	Transformation/transcription domain-associated protein OS=Mus musculus GN=Trrap PE=1 SV=2	Trrap	0	0	0	0	1.59022e+06	1.59022e+06	1.60464e+06	1.66566e+06
P42669	5	5	466.95	Transcriptional activator protein Pur-alpha OS=Mus musculus GN=Pura PE=1 SV=1	Pura	0	0	0	0	4.55067e+06	4.55067e+06	4.62341e+06	5.01316e+06
Q64705	5	5	466.14	Upstream stimulatory factor 2 OS=Mus musculus GN=Usf2 PE=1 SV=1	Usf2	0	0	0	0	5.43545e+06	5.43545e+06	5.12822e+06	4.55922e+06
P70318	7	7	462.97	Nucleolysin TIAR OS=Mus musculus GN=Tial1 PE=1 SV=1	Tial1	0	0	0	0	1.09221e+07	1.09221e+07	6.86558e+06	7.40435e+06
Q6KCD5	9	9	458.82	Nipped-B-like protein OS=Mus musculus GN=Nipbl PE=1 SV=1	Nipbl	0	0	0	0	583177	583177	1.03941e+06	709548
Q8BX09	8	8	456.91	Retinoblastoma-binding protein 5 OS=Mus musculus GN=Rbbp5 PE=1 SV=2	Rbbp5	0	0	0	0	1.47421e+06	1.47421e+06	2.00013e+06	1.43019e+06
Q8C796	8	8	451.01	REST corepressor 2 OS=Mus musculus GN=Rcor2 PE=1 SV=1	Rcor2	0	0	0	0	2.93328e+06	2.93328e+06	3.49708e+06	3.47891e+06
Q8BGT7	7	7	450.07	Survival of motor neuron-related-splicing factor 30 OS=Mus musculus GN=Smndc1 PE=1 SV=1	Smndc1	0	0	0	0	5.33672e+06	5.33672e+06	4.55911e+06	4.22761e+06
Q8BZX4	6	6	446.7	Splicing regulatory glutamine/lysine-rich protein 1 OS=Mus musculus GN=Srek1 PE=2 SV=1	Srek1	0	0	0	0	7.12913e+06	7.12913e+06	5.85893e+06	5.66575e+06
P30051	6	6	442.18	Transcriptional enhancer factor TEF-1 OS=Mus musculus GN=Tead1 PE=1 SV=2	Tead1	0	0	0	0	1.65143e+06	1.65143e+06	3.40707e+06	3.89253e+06
P70700	10	9	439.28	DNA-directed RNA polymerase I subunit RPA2 OS=Mus musculus GN=Polr1b PE=1 SV=2	Polr1b	0	0	0	0	1.21646e+06	1.21646e+06	1.08697e+06	1.19805e+06
Q8CG46	9	9	438.54	Structural maintenance of chromosomes protein 5 OS=Mus musculus GN=Smc5 PE=1 SV=1	Smc5	0	0	0	0	860693	860693	838339	478106
Q9QYC0	8	8	434.25	Alpha-adducin OS=Mus musculus GN=Add1 PE=1 SV=2	Add1	0	0	0	0	3.93041e+06	3.93041e+06	2.71557e+06	2.18819e+06
P28740	8	8	432.11	Kinesin-like protein KIF2A OS=Mus musculus GN=Kif2a PE=1 SV=2	Kif2a	0	0	0	0	1.27207e+06	1.27207e+06	1.13306e+06	866641
P56546	6	6	431.54	C-terminal-binding protein 2 OS=Mus musculus GN=Ctbp2 PE=1 SV=2	Ctbp2	0	0	0	0	2.20525e+06	2.20525e+06	2.12572e+06	1.30028e+06
Q80X82	9	9	424.71	Symplekin OS=Mus musculus GN=Sympk PE=1 SV=1	Sympk	0	0	0	0	1.23471e+06	1.23471e+06	1.35702e+06	1.51838e+06
Q60596	7	7	423.45	DNA repair protein XRCC1 OS=Mus musculus GN=Xrcc1 PE=1 SV=2	Xrcc1	0	0	0	0	2.2022e+06	2.2022e+06	2.1578e+06	1.12153e+06
Q8BHG9	7	7	422.84	CGG triplet repeat-binding protein 1 OS=Mus musculus GN=Cggbp1 PE=1 SV=1	Cggbp1	0	0	0	0	4.0025e+06	4.0025e+06	4.03855e+06	4.80656e+06
Q3TYA6	9	9	421.57	M-phase phosphoprotein 8 OS=Mus musculus GN=Mphosph8 PE=1 SV=1	Mphosph8	0	0	0	0	1.09807e+06	1.09807e+06	988724	1.06055e+06
O35218	7	7	419.44	Cleavage and polyadenylation specificity factor subunit 2 OS=Mus musculus GN=Cpsf2 PE=1 SV=1	Cpsf2	0	0	0	0	1.44346e+06	1.44346e+06	1.27528e+06	1.10493e+06
P31266	8	8	419.03	Recombining binding protein suppressor of hairless OS=Mus musculus GN=Rbpj PE=1 SV=1	Rbpj	0	0	0	0	3.44198e+06	3.44198e+06	3.21406e+06	4.10452e+06
Q9EPQ8	9	9	412.08	Transcription factor 20 OS=Mus musculus GN=Tcf20 PE=1 SV=3	Tcf20	0	0	0	0	1.37861e+06	1.37861e+06	1.45629e+06	1.28619e+06
Q62203	7	7	410.08	Splicing factor 3A subunit 2 OS=Mus musculus GN=Sf3a2 PE=1 SV=2	Sf3a2	0	0	0	0	1.0304e+07	1.0304e+07	1.11527e+07	1.16831e+07
O88291	6	6	406.73	DBIRD complex subunit ZNF326 OS=Mus musculus GN=Znf326 PE=1 SV=1	Znf326	0	0	0	0	917139	917139	3.44992e+06	2.87858e+06
A2AJK6	7	7	406.25	Chromodomain-helicase-DNA-binding protein 7 OS=Mus musculus GN=Chd7 PE=1 SV=1	Chd7	0	0	0	0	1.01539e+06	1.01539e+06	1.021e+06	764832
Q9D0I8	8	8	405.44	mRNA turnover protein 4 homolog OS=Mus musculus GN=Mrto4 PE=1 SV=1	Mrto4	0	0	0	0	3.06586e+06	3.06586e+06	2.43686e+06	2.98026e+06
Q8BJ05	8	7	405.43	Zinc finger CCCH domain-containing protein 14 OS=Mus musculus GN=Zc3h14 PE=1 SV=1	Zc3h14	0	0	0	0	635339	635339	857733	682199
O70310	7	7	403.97	Glycylpeptide N-tetradecanoyltransferase 1 OS=Mus musculus GN=Nmt1 PE=1 SV=1	Nmt1	0	0	0	0	4.12569e+06	4.12569e+06	3.78225e+06	3.22706e+06
F7BJB9	8	8	402.12	MORC family CW-type zinc finger protein 3 OS=Mus musculus GN=Morc3 PE=1 SV=1	Morc3	0	0	0	0	4.84314e+06	4.84314e+06	5.11151e+06	5.50045e+06
Q99LC2	7	7	399.92	Cleavage stimulation factor subunit 1 OS=Mus musculus GN=Cstf1 PE=1 SV=1	Cstf1	0	0	0	0	6.2494e+06	6.2494e+06	6.34093e+06	5.4961e+06
Q8BUI3	7	7	399.85	Leucine-rich repeat and WD repeat-containing protein 1 OS=Mus musculus GN=LRWD1 PE=2 SV=1	LRWD1	0	0	0	0	1.58437e+06	1.58437e+06	1.31848e+06	3.09957e+06
Q61312	7	7	398.95	Transcription factor AP-2 gamma OS=Mus musculus GN=Tfap2c PE=1 SV=2	Tfap2c	0	0	0	0	1.2206e+06	1.2206e+06	958527	1.27775e+06
Q9WUK4	8	8	398.78	Replication factor C subunit 2 OS=Mus musculus GN=Rfc2 PE=1 SV=1	Rfc2	0	0	0	0	2.56485e+06	2.56485e+06	2.05337e+06	3.25582e+06
Q3UNW5	7	7	398.78	Transcription factor CP2-like protein 1 OS=Mus musculus GN=Tfcp2l1 PE=1 SV=2	Tfcp2l1	0	0	0	0	5.97335e+06	5.97335e+06	5.77323e+06	5.63852e+06
Q80U72	7	7	397.64	Protein scribble homolog OS=Mus musculus GN=Scrib PE=1 SV=2	Scrib	0	0	0	0	608779	608779	833569	1.83751e+06
O35643	8	8	396.19	AP-1 complex subunit beta-1 OS=Mus musculus GN=Ap1b1 PE=1 SV=2	Ap1b1	0	0	0	0	3.4659e+06	3.4659e+06	3.08746e+06	2.03624e+06
Q8VDM6	8	8	392.03	Heterogeneous nuclear ribonucleoprotein U-like protein 1 OS=Mus musculus GN=Hnrnpul1 PE=1 SV=1	Hnrnpul1	0	0	0	0	1.71902e+06	1.71902e+06	2.52699e+06	3.35682e+06
O35326	4	4	390.89	Serine/arginine-rich splicing factor 5 OS=Mus musculus GN=Srsf5 PE=1 SV=2	Srsf5	0	0	0	0	1.15006e+07	1.15006e+07	1.08016e+07	1.25541e+07
Q9CR11	5	5	388.74	YEATS domain-containing protein 4 OS=Mus musculus GN=Yeats4 PE=2 SV=1	Yeats4	0	0	0	0	1.01369e+06	1.01369e+06	766494	1.38783e+06
P17427	8	8	387.78	AP-2 complex subunit alpha-2 OS=Mus musculus GN=Ap2a2 PE=1 SV=2	Ap2a2	0	0	0	0	940870	940870	961798	1.25869e+06
Q9D0F6	8	8	387.43	Replication factor C subunit 5 OS=Mus musculus GN=Rfc5 PE=1 SV=1	Rfc5	0	0	0	0	2.19447e+06	2.19447e+06	1.64411e+06	1.43721e+06
Q6PGC1	8	8	385.7	ATP-dependent RNA helicase DHX29 OS=Mus musculus GN=Dhx29 PE=1 SV=1	Dhx29	0	0	0	0	539329	539329	472810	530263
G5E8K5	7	7	383.42	Ankyrin-3 OS=Mus musculus GN=Ank3 PE=1 SV=1	Ank3	0	0	0	0	1.13605e+06	1.13605e+06	919404	955311
Q9D0P7	8	8	382.53	Proline/serine-rich coiled-coil protein 1 OS=Mus musculus GN=Psrc1 PE=1 SV=2	Psrc1	0	0	0	0	1.71565e+06	1.71565e+06	1.5512e+06	1.98708e+06
Q62296	4	4	380.11	Transcriptional enhancer factor TEF-3 OS=Mus musculus GN=Tead4 PE=1 SV=2	Tead4	0	0	0	0	2.1575e+06	2.1575e+06	2.181e+06	2.00952e+06
P52479	8	8	379.95	Ubiquitin carboxyl-terminal hydrolase 10 OS=Mus musculus GN=Usp10 PE=1 SV=3	Usp10	0	0	0	0	1.12803e+06	1.12803e+06	2.53289e+06	1.91548e+06
Q9D0B0	8	7	377.08	Serine/arginine-rich splicing factor 9 OS=Mus musculus GN=Srsf9 PE=1 SV=1	Srsf9	0	0	0	0	1.1351e+07	1.1351e+07	9.40625e+06	1.10664e+07
Q8CHT3	6	6	372.37	Integrator complex subunit 5 OS=Mus musculus GN=Ints5 PE=2 SV=1	Ints5	0	0	0	0	533107	533107	807722	734371
Q80W00	7	7	370.13	Serine/threonine-protein phosphatase 1 regulatory subunit 10 OS=Mus musculus GN=Ppp1r10 PE=1 SV=1	Ppp1r10	0	0	0	0	1.74962e+06	1.74962e+06	1.57581e+06	2.84946e+06
Q80US4	4	4	368.97	Actin-related protein 5 OS=Mus musculus GN=Actr5 PE=1 SV=3	Actr5	0	0	0	0	1.0285e+06	1.0285e+06	831575	793424
Q8CFE3	5	5	368.34	REST corepressor 1 OS=Mus musculus GN=Rcor1 PE=1 SV=2	Rcor1	0	0	0	0	2.85578e+06	2.85578e+06	1.74053e+06	1.40636e+06
Q61687	7	7	367.18	Transcriptional regulator ATRX OS=Mus musculus GN=Atrx PE=1 SV=3	Atrx	0	0	0	0	1.08749e+06	1.08749e+06	972897	1.35109e+06
A2A791	6	6	364.29	Zinc finger MYM-type protein 4 OS=Mus musculus GN=Zmym4 PE=1 SV=1	Zmym4	0	0	0	0	1.31462e+06	1.31462e+06	1.24316e+06	1.11139e+06
Q61464	7	6	364.16	Zinc finger protein 638 OS=Mus musculus GN=Znf638 PE=1 SV=2	Znf638	0	0	0	0	806806	806806	460432	410155
Q8C052	6	6	363.72	Microtubule-associated protein 1S OS=Mus musculus GN=Map1s PE=1 SV=2	Map1s	0	0	0	0	1.16775e+06	1.16775e+06	1.19437e+06	1.16467e+06
A6PWY4	5	5	363.18	WD repeat-containing protein 76 OS=Mus musculus GN=Wdr76 PE=1 SV=1	Wdr76	0	0	0	0	1.47838e+06	1.47838e+06	1.31528e+06	782784
Q9EP97	5	5	361.85	Sentrin-specific protease 3 OS=Mus musculus GN=Senp3 PE=1 SV=1	Senp3	0	0	0	0	2.93335e+06	2.93335e+06	2.23764e+06	1.99359e+06
Q5SUF2	5	5	361.24	Luc7-like protein 3 OS=Mus musculus GN=Luc7l3 PE=1 SV=1	Luc7l3	0	0	0	0	4.04735e+06	4.04735e+06	3.52585e+06	1.58709e+06
Q8VDF2	6	6	360.76	E3 ubiquitin-protein ligase UHRF1 OS=Mus musculus GN=Uhrf1 PE=1 SV=2	Uhrf1	0	0	0	0	876475	876475	1.01543e+06	1.48437e+06
Q9R069	7	7	358.87	Basal cell adhesion molecule OS=Mus musculus GN=Bcam PE=1 SV=1	Bcam	0	0	0	0	1.09599e+06	1.09599e+06	999776	639660
Q9JHC9	6	6	358.48	ETS-related transcription factor Elf-2 OS=Mus musculus GN=Elf2 PE=1 SV=1	Elf2	0	0	0	0	453541	453541	832414	838409
Q61624	6	6	356.04	Zinc finger protein 148 OS=Mus musculus GN=Znf148 PE=1 SV=2	Znf148	0	0	0	0	1.7528e+06	1.7528e+06	1.03602e+06	1.09615e+06
Q9Z1N7	5	5	352.81	AT-rich interactive domain-containing protein 3B OS=Mus musculus GN=Arid3b PE=1 SV=1	Arid3b	0	0	0	0	2.10334e+06	2.10334e+06	1.90073e+06	2.73754e+06
Q61686	6	6	349.94	Chromobox protein homolog 5 OS=Mus musculus GN=Cbx5 PE=1 SV=1	Cbx5	0	0	0	0	8.0613e+06	8.0613e+06	7.03056e+06	5.85992e+06
Q8BTV2	6	6	347.79	Cleavage and polyadenylation specificity factor subunit 7 OS=Mus musculus GN=Cpsf7 PE=1 SV=2	Cpsf7	0	0	0	0	4.33556e+06	4.33556e+06	3.31249e+06	2.91798e+06
Q61164	7	7	344.65	Transcriptional repressor CTCF OS=Mus musculus GN=Ctcf PE=1 SV=2	Ctcf	0	0	0	0	5.27409e+06	5.27409e+06	4.64558e+06	2.10942e+06
Q8CG47	7	7	344.15	Structural maintenance of chromosomes protein 4 OS=Mus musculus GN=Smc4 PE=1 SV=1	Smc4	0	0	0	0	1.40269e+06	1.40269e+06	1.27554e+06	2.04321e+06
P52432	5	5	344.02	DNA-directed RNA polymerases I and III subunit RPAC1 OS=Mus musculus GN=Polr1c PE=1 SV=3	Polr1c	0	0	0	0	7.73581e+06	7.73581e+06	7.85875e+06	7.01307e+06
Q9CPT5	6	6	343.68	Nucleolar protein 16 OS=Mus musculus GN=Nop16 PE=1 SV=1	Nop16	0	0	0	0	0	0	0	0
P68033	3	3	343.55	Actin, alpha cardiac muscle 1 OS=Mus musculus GN=Actc1 PE=1 SV=1	Actc1	0	0	0	0	1.94075e+08	1.94075e+08	1.84711e+08	2.0923e+08
A2BE28	7	7	343.4	Ribosomal biogenesis protein LAS1L OS=Mus musculus GN=Las1l PE=1 SV=1	Las1l	0	0	0	0	764823	764823	667027	389563
Q3TIV5	7	7	341.65	Zinc finger CCCH domain-containing protein 15 OS=Mus musculus GN=Zc3h15 PE=1 SV=2	Zc3h15	0	0	0	0	2.53777e+06	2.53777e+06	2.0772e+06	892117
Q924K8	8	8	339.61	Metastasis-associated protein MTA3 OS=Mus musculus GN=Mta3 PE=1 SV=1	Mta3	0	0	0	0	1.24848e+06	1.24848e+06	1.34192e+06	1.35465e+06
Q3URK3	7	7	335.17	Methylcytosine dioxygenase TET1 OS=Mus musculus GN=Tet1 PE=1 SV=2	Tet1	0	0	0	0	1.04472e+06	1.04472e+06	778371	695417
Q8R323	6	6	334.04	Replication factor C subunit 3 OS=Mus musculus GN=Rfc3 PE=1 SV=1	Rfc3	0	0	0	0	1.42859e+06	1.42859e+06	1.14655e+06	1.11603e+06
P20263	6	6	333.58	POU domain, class 5, transcription factor 1 OS=Mus musculus GN=Pou5f1 PE=1 SV=1	Pou5f1	0	0	0	0	2.85071e+06	2.85071e+06	3.22908e+06	2.79409e+06
Q9DCD2	6	6	328.04	Pre-mRNA-splicing factor SYF1 OS=Mus musculus GN=Xab2 PE=1 SV=1	Xab2	0	0	0	0	581783	581783	445863	592562
Q3UCQ1	6	6	327	Forkhead box protein K2 OS=Mus musculus GN=Foxk2 PE=1 SV=3	Foxk2	0	0	0	0	1.0483e+06	1.0483e+06	1.39972e+06	1.40726e+06
O70305	4	4	326.93	Ataxin-2 OS=Mus musculus GN=Atxn2 PE=1 SV=1	Atxn2	0	0	0	0	623336	623336	651232	530174
Q62176	5	5	326.11	RNA-binding protein 38 OS=Mus musculus GN=Rbm38 PE=1 SV=2	Rbm38	0	0	0	0	2.76002e+06	2.76002e+06	2.51718e+06	2.878e+06
Q61216	7	7	324.83	Double-strand break repair protein MRE11A OS=Mus musculus GN=Mre11a PE=1 SV=1	Mre11a	0	0	0	0	840656	840656	712716	317902
Q8CIE6	7	7	324.74	Coatomer subunit alpha OS=Mus musculus GN=Copa PE=1 SV=2	Copa	0	0	0	0	525377	525377	550213	91622.5
P70353	7	7	321.53	Nuclear transcription factor Y subunit gamma OS=Mus musculus GN=Nfyc PE=1 SV=2	Nfyc	0	0	0	0	5.3496e+06	5.3496e+06	4.57656e+06	1.27827e+06
Q91VL8	4	4	320.06	Telomeric repeat-binding factor 2-interacting protein 1 OS=Mus musculus GN=Terf2ip PE=1 SV=1	Terf2ip	0	0	0	0	2.14088e+06	2.14088e+06	2.51101e+06	1.51541e+06
Q9CSU0	5	5	320.02	Regulation of nuclear pre-mRNA domain-containing protein 1B OS=Mus musculus GN=Rprd1b PE=1 SV=2	Rprd1b	0	0	0	0	2.2667e+06	2.2667e+06	2.08665e+06	2.33177e+06
Q9Z2D6	5	5	319.76	Methyl-CpG-binding protein 2 OS=Mus musculus GN=Mecp2 PE=1 SV=1	Mecp2	0	0	0	0	1.00485e+06	1.00485e+06	1.38655e+06	1.28447e+06
P62996	5	5	319.54	Transformer-2 protein homolog beta OS=Mus musculus GN=Tra2b PE=1 SV=1	Tra2b	0	0	0	0	1.36901e+07	1.36901e+07	1.05233e+07	9.18173e+06
Q8BHN5	6	6	318.41	RNA-binding protein 45 OS=Mus musculus GN=Rbm45 PE=1 SV=1	Rbm45	0	0	0	0	2.38506e+06	2.38506e+06	2.12835e+06	1.9323e+06
P59708	3	3	318.05	Splicing factor 3B subunit 6 OS=Mus musculus GN=Sf3b6 PE=1 SV=1	Sf3b6	0	0	0	0	6.47488e+06	6.47488e+06	6.97836e+06	1.32552e+07
Q91YE7	5	5	317.3	RNA-binding protein 5 OS=Mus musculus GN=Rbm5 PE=1 SV=1	Rbm5	0	0	0	0	539599	539599	623700	385205
Q8K1R3	6	6	315.3	Polyribonucleotide nucleotidyltransferase 1, mitochondrial OS=Mus musculus GN=Pnpt1 PE=1 SV=1	Pnpt1	0	0	0	0	1.07348e+06	1.07348e+06	1.07475e+06	1.23847e+06
Q8VHK9	6	6	313.38	ATP-dependent RNA helicase DHX36 OS=Mus musculus GN=Dhx36 PE=1 SV=2	Dhx36	0	0	0	0	802444	802444	718164	633572
Q8BP71	5	5	312.69	RNA binding protein fox-1 homolog 2 OS=Mus musculus GN=Rbfox2 PE=1 SV=2	Rbfox2	0	0	0	0	4.77645e+06	4.77645e+06	4.59371e+06	4.80125e+06
Q8CCF0	5	5	311.55	U4/U6 small nuclear ribonucleoprotein Prp31 OS=Mus musculus GN=Prpf31 PE=1 SV=3	Prpf31	0	0	0	0	2.86941e+06	2.86941e+06	2.77591e+06	2.84781e+06
Q810D6	6	6	311.34	Glutamate-rich WD repeat-containing protein 1 OS=Mus musculus GN=Grwd1 PE=1 SV=2	Grwd1	0	0	0	0	4.64741e+06	4.64741e+06	3.1618e+06	2.94088e+06
Q7TQH0	5	5	309.18	Ataxin-2-like protein OS=Mus musculus GN=Atxn2l PE=1 SV=1	Atxn2l	0	0	0	0	3.40453e+06	3.40453e+06	3.00402e+06	1.8061e+06
O70311	6	6	308.38	Glycylpeptide N-tetradecanoyltransferase 2 OS=Mus musculus GN=Nmt2 PE=1 SV=1	Nmt2	0	0	0	0	657495	657495	786256	592337
Q9CWS4	4	4	305.33	Integrator complex subunit 11 OS=Mus musculus GN=Cpsf3l PE=1 SV=1	Cpsf3l	0	0	0	0	788383	788383	966506	957026
P48193	5	5	302.73	Protein 4.1 OS=Mus musculus GN=Epb41 PE=1 SV=2	Epb41	0	0	0	0	699214	699214	638251	1.00057e+06
Q64092	5	5	301.14	Transcription factor E3 OS=Mus musculus GN=Tfe3 PE=1 SV=2	Tfe3	0	0	0	0	4.12066e+06	4.12066e+06	3.98297e+06	3.71168e+06
Q6ZQF0	6	6	300.8	DNA topoisomerase 2-binding protein 1 OS=Mus musculus GN=Topbp1 PE=1 SV=2	Topbp1	0	0	0	0	198300	198300	371362	291039
Q9CPY3	6	6	299.19	Sororin OS=Mus musculus GN=Cdca5 PE=1 SV=1	Cdca5	0	0	0	0	1.9405e+06	1.9405e+06	1.78388e+06	1.49147e+06
Q6P3Y5	6	6	297.52	Zinc finger protein 280C OS=Mus musculus GN=Znf280c PE=1 SV=1	Znf280c	0	0	0	0	888192	888192	856560	848935
P70324	4	4	296.4	T-box transcription factor TBX3 OS=Mus musculus GN=Tbx3 PE=1 SV=3	Tbx3	0	0	0	0	711901	711901	562245	559242
O35345	5	5	295.16	Importin subunit alpha-7 OS=Mus musculus GN=Kpna6 PE=1 SV=2	Kpna6	0	0	0	0	433599	433599	433973	1.2772e+06
P56960	6	6	294.27	Exosome component 10 OS=Mus musculus GN=Exosc10 PE=1 SV=2	Exosc10	0	0	0	0	462396	462396	500876	445858
Q6PAL0	6	6	294.21	BEN domain-containing protein 3 OS=Mus musculus GN=Bend3 PE=1 SV=1	Bend3	0	0	0	0	3.58057e+06	3.58057e+06	2.2321e+06	1.91153e+06
Q99JR8	6	6	292.79	SWI/SNF-related matrix-associated actin-dependent regulator of chromatin subfamily D member 2 OS=Mus musculus GN=Smarcd2 PE=1 SV=2	Smarcd2	0	0	0	0	1.71919e+06	1.71919e+06	1.38178e+06	940957
Q9R207	5	5	290.52	Nibrin OS=Mus musculus GN=Nbn PE=1 SV=1	Nbn	0	0	0	0	655954	655954	680675	489967
Q9DBG3	6	5	289.21	AP-2 complex subunit beta OS=Mus musculus GN=Ap2b1 PE=1 SV=1	Ap2b1	0	0	0	0	1.44881e+06	1.44881e+06	1.15411e+06	793985
Q6PAL7	5	5	287.48	AT-hook DNA-binding motif-containing protein 1 OS=Mus musculus GN=Ahdc1 PE=1 SV=1	Ahdc1	0	0	0	0	354432	354432	608773	707844
P70279	5	5	286.33	Surfeit locus protein 6 OS=Mus musculus GN=Surf6 PE=1 SV=1	Surf6	0	0	0	0	0	0	0	0
O35613	5	5	285.99	Death domain-associated protein 6 OS=Mus musculus GN=Daxx PE=1 SV=1	Daxx	0	0	0	0	260804	260804	291678	776716
P48379	4	4	284.82	DNA-binding protein RFX2 OS=Mus musculus GN=Rfx2 PE=1 SV=2	Rfx2	0	0	0	0	1.35922e+06	1.35922e+06	1.26468e+06	1.05876e+06
Q8VIG1	5	5	283.38	RE1-silencing transcription factor OS=Mus musculus GN=Rest PE=1 SV=2	Rest	0	0	0	0	651784	651784	598815	569023
Q921X9	5	5	282.31	Protein disulfide-isomerase A5 OS=Mus musculus GN=Pdia5 PE=1 SV=1	Pdia5	0	0	0	0	527681	527681	696482	619442
Q9QXK7	6	6	280.81	Cleavage and polyadenylation specificity factor subunit 3 OS=Mus musculus GN=Cpsf3 PE=1 SV=2	Cpsf3	0	0	0	0	672389	672389	822974	915072
Q99KK2	6	6	280.39	N-acylneuraminate cytidylyltransferase OS=Mus musculus GN=Cmas PE=1 SV=2	Cmas	0	0	0	0	2.0254e+06	2.0254e+06	1.57996e+06	998818
Q9Z1Z0	5	5	279.63	General vesicular transport factor p115 OS=Mus musculus GN=Uso1 PE=1 SV=2	Uso1	0	0	0	0	570849	570849	693829	684347
Q8BGA5	5	5	278.85	KRR1 small subunit processome component homolog OS=Mus musculus GN=Krr1 PE=2 SV=1	Krr1	0	0	0	0	0	0	0	0
Q91V81	6	6	277.72	RNA-binding protein 42 OS=Mus musculus GN=Rbm42 PE=1 SV=1	Rbm42	0	0	0	0	1.09512e+06	1.09512e+06	1.94803e+06	2.45082e+06
Q9WU00	6	6	274.79	Nuclear respiratory factor 1 OS=Mus musculus GN=Nrf1 PE=1 SV=2	Nrf1	0	0	0	0	1.67149e+06	1.67149e+06	2.07324e+06	2.30904e+06
Q9D0N7	4	4	271.62	Chromatin assembly factor 1 subunit B OS=Mus musculus GN=Chaf1b PE=1 SV=1	Chaf1b	0	0	0	0	586445	586445	595447	1.8919e+06
Q8CFQ3	6	6	270.4	Intron-binding protein aquarius OS=Mus musculus GN=Aqr PE=1 SV=2	Aqr	0	0	0	0	2.0868e+06	2.0868e+06	1.56717e+06	1.69352e+06
Q5DW34	6	6	269.03	Histone-lysine N-methyltransferase EHMT1 OS=Mus musculus GN=Ehmt1 PE=1 SV=2	Ehmt1	0	0	0	0	149963	149963	345643	1.68642e+06
Q8BMQ2	6	6	268.8	General transcription factor 3C polypeptide 4 OS=Mus musculus GN=Gtf3c4 PE=1 SV=2	Gtf3c4	0	0	0	0	651869	651869	423121	602938
O54790	4	4	266.88	Transcription factor MafG OS=Mus musculus GN=Mafg PE=1 SV=1	Mafg	0	0	0	0	3.16378e+06	3.16378e+06	2.60139e+06	3.00729e+06
P48754	5	4	266.72	Breast cancer type 1 susceptibility protein homolog OS=Mus musculus GN=Brca1 PE=1 SV=3	Brca1	0	0	0	0	530925	530925	435224	636990
P70371	4	4	266.49	Telomeric repeat-binding factor 1 OS=Mus musculus GN=Terf1 PE=1 SV=1	Terf1	0	0	0	0	506164	506164	1.02851e+06	905961
Q8CIM8	5	5	265.97	Integrator complex subunit 4 OS=Mus musculus GN=Ints4 PE=1 SV=1	Ints4	0	0	0	0	144259	144259	92519.3	449631
Q99NA9	6	6	264.99	Polycomb group RING finger protein 6 OS=Mus musculus GN=Pcgf6 PE=1 SV=1	Pcgf6	0	0	0	0	1.43861e+06	1.43861e+06	1.20381e+06	1.26247e+06
Q922P9	5	5	260.96	Putative oxidoreductase GLYR1 OS=Mus musculus GN=Glyr1 PE=1 SV=1	Glyr1	0	0	0	0	0	0	0	0
O35144	5	5	259.38	Telomeric repeat-binding factor 2 OS=Mus musculus GN=Terf2 PE=1 SV=3	Terf2	0	0	0	0	2.18125e+06	2.18125e+06	2.13265e+06	3.04921e+06
Q60793	5	5	259.06	Krueppel-like factor 4 OS=Mus musculus GN=Klf4 PE=1 SV=3	Klf4	0	0	0	0	1.85189e+06	1.85189e+06	1.86697e+06	2.04295e+06
Q68FL6	5	4	258.3	Methionine--tRNA ligase, cytoplasmic OS=Mus musculus GN=Mars PE=1 SV=1	Mars	0	0	0	0	1.38608e+06	1.38608e+06	1.43897e+06	1.4705e+06
Q9DCE5	4	4	255.5	p21-activated protein kinase-interacting protein 1 OS=Mus musculus GN=Pak1ip1 PE=1 SV=2	Pak1ip1	0	0	0	0	890962	890962	881486	967761
Q9DBR0	4	4	254.77	A-kinase anchor protein 8 OS=Mus musculus GN=Akap8 PE=1 SV=1	Akap8	0	0	0	0	663860	663860	731575	1.83462e+06
Q02395	4	4	254.27	Metal-response element-binding transcription factor 2 OS=Mus musculus GN=Mtf2 PE=1 SV=2	Mtf2	0	0	0	0	4.07373e+06	4.07373e+06	2.93405e+06	3.717e+06
Q8BWW4	3	3	253.06	La-related protein 4 OS=Mus musculus GN=Larp4 PE=1 SV=2	Larp4	0	0	0	0	2.05323e+06	2.05323e+06	2.11045e+06	1.85419e+06
Q9CSH3	5	5	252.07	Exosome complex exonuclease RRP44 OS=Mus musculus GN=Dis3 PE=1 SV=4	Dis3	0	0	0	0	931882	931882	911792	925252
Q8BMC4	3	3	251.47	Nucleolar protein 9 OS=Mus musculus GN=Nop9 PE=1 SV=1	Nop9	0	0	0	0	107361	107361	273696	345287
Q8CI11	4	4	251.36	Guanine nucleotide-binding protein-like 3 OS=Mus musculus GN=Gnl3 PE=1 SV=2	Gnl3	0	0	0	0	1.02399e+06	1.02399e+06	772415	861953
P84091	5	4	251.35	AP-2 complex subunit mu OS=Mus musculus GN=Ap2m1 PE=1 SV=1	Ap2m1	0	0	0	0	2.34591e+06	2.34591e+06	2.35052e+06	2.71913e+06
P60762	5	5	249.59	Mortality factor 4-like protein 1 OS=Mus musculus GN=Morf4l1 PE=1 SV=2	Morf4l1	0	0	0	0	1.63559e+06	1.63559e+06	1.62281e+06	1.49658e+06
Q8QZY9	4	4	249.51	Splicing factor 3B subunit 4 OS=Mus musculus GN=Sf3b4 PE=1 SV=1	Sf3b4	0	0	0	0	9.34458e+06	9.34458e+06	7.9202e+06	8.02637e+06
Q9R1K9	3	3	247.16	Centrin-2 OS=Mus musculus GN=Cetn2 PE=1 SV=1	Cetn2	0	0	0	0	987153	987153	1.00703e+06	788542
Q5SFM8	5	5	246.52	RNA-binding protein 27 OS=Mus musculus GN=Rbm27 PE=1 SV=3	Rbm27	0	0	0	0	976768	976768	699760	763131
Q00899	3	3	246.17	Transcriptional repressor protein YY1 OS=Mus musculus GN=Yy1 PE=1 SV=1	Yy1	0	0	0	0	2.3941e+06	2.3941e+06	2.48215e+06	2.29873e+06
Q7TSZ8	5	5	245.99	Nucleus accumbens-associated protein 1 OS=Mus musculus GN=Nacc1 PE=1 SV=1	Nacc1	0	0	0	0	871823	871823	938227	1.20757e+06
O88986	4	4	245.08	2-amino-3-ketobutyrate coenzyme A ligase, mitochondrial OS=Mus musculus GN=Gcat PE=1 SV=2	Gcat	0	0	0	0	1.55592e+06	1.55592e+06	1.17134e+06	1.50548e+06
Q923D4	3	3	244.15	Splicing factor 3B subunit 5 OS=Mus musculus GN=Sf3b5 PE=1 SV=1	Sf3b5	0	0	0	0	9.54193e+06	9.54193e+06	1.62311e+07	1.20569e+07
Q60759	4	4	243.17	Glutaryl-CoA dehydrogenase, mitochondrial OS=Mus musculus GN=Gcdh PE=1 SV=2	Gcdh	0	0	0	0	586955	586955	711279	968674
Q9QXV3	3	3	240.85	Inhibitor of growth protein 1 OS=Mus musculus GN=Ing1 PE=2 SV=1	Ing1	0	0	0	0	558316	558316	846654	778414
Q61474	3	3	240.73	RNA-binding protein Musashi homolog 1 OS=Mus musculus GN=Msi1 PE=1 SV=1	Msi1	0	0	0	0	1.1906e+06	1.1906e+06	1.36881e+06	1.48549e+06
Q9D6N5	4	4	240.57	Dr1-associated corepressor OS=Mus musculus GN=Drap1 PE=1 SV=3	Drap1	0	0	0	0	610446	610446	568249	880238
P52912	4	4	240.55	Nucleolysin TIA-1 OS=Mus musculus GN=Tia1 PE=1 SV=1	Tia1	0	0	0	0	5.16477e+06	5.16477e+06	4.78477e+06	4.86622e+06
Q922W5	4	4	240.06	Pyrroline-5-carboxylate reductase 1, mitochondrial OS=Mus musculus GN=Pycr1 PE=1 SV=1	Pycr1	0	0	0	0	2.10102e+06	2.10102e+06	2.72044e+06	2.14759e+06
Q9QWF0	5	5	240.02	Chromatin assembly factor 1 subunit A OS=Mus musculus GN=Chaf1a PE=1 SV=1	Chaf1a	0	0	0	0	1.01762e+06	1.01762e+06	1.5646e+06	1.73812e+06
O70230	5	4	239.51	Zinc finger protein 143 OS=Mus musculus GN=Znf143 PE=1 SV=2	Znf143	0	0	0	0	321956	321956	816798	903819
Q60899	4	4	238.85	ELAV-like protein 2 OS=Mus musculus GN=Elavl2 PE=2 SV=1	Elavl2	0	0	0	0	793477	793477	876297	1.24934e+06
Q8BMJ3	3	3	238.82	Eukaryotic translation initiation factor 1A, X-chromosomal OS=Mus musculus GN=Eif1ax PE=2 SV=3	Eif1ax	0	0	0	0	3.6096e+06	3.6096e+06	3.98142e+06	3.27774e+06
Q6ZPV2	5	5	237.11	DNA helicase INO80 OS=Mus musculus GN=Ino80 PE=1 SV=2	Ino80	0	0	0	0	1.51533e+06	1.51533e+06	159567	319677
O88665	4	4	236.79	Bromodomain-containing protein 7 OS=Mus musculus GN=Brd7 PE=1 SV=1	Brd7	0	0	0	0	1.04419e+06	1.04419e+06	1.14003e+06	1.05201e+06
Q62255	4	4	236.69	Sal-like protein 3 OS=Mus musculus GN=Sall3 PE=1 SV=2	Sall3	0	0	0	0	295615	295615	685945	850563
Q8BL74	4	4	236.23	General transcription factor 3C polypeptide 2 OS=Mus musculus GN=Gtf3c2 PE=2 SV=2	Gtf3c2	0	0	0	0	261264	261264	105189	102427
Q9Z2I9	4	4	235.76	Succinate--CoA ligase [ADP-forming] subunit beta, mitochondrial OS=Mus musculus GN=Sucla2 PE=1 SV=2	Sucla2	0	0	0	0	729241	729241	667013	539295
Q8K4P0	5	5	232.61	pre-mRNA 3' end processing protein WDR33 OS=Mus musculus GN=Wdr33 PE=1 SV=1	Wdr33	0	0	0	0	2.74813e+06	2.74813e+06	2.2739e+06	2.13581e+06
Q8BX10	4	4	231.29	Serine/threonine-protein phosphatase PGAM5, mitochondrial OS=Mus musculus GN=Pgam5 PE=1 SV=1	Pgam5	0	0	0	0	886729	886729	1.05356e+06	873522
P62631	3	3	230.61	Elongation factor 1-alpha 2 OS=Mus musculus GN=Eef1a2 PE=1 SV=1	Eef1a2	0	0	0	0	0	0	0	0
Q9JLZ6	4	4	230.32	Hypermethylated in cancer 2 protein OS=Mus musculus GN=Hic2 PE=2 SV=4	Hic2	0	0	0	0	788987	788987	837045	698392
P18155	4	4	229.69	Bifunctional methylenetetrahydrofolate dehydrogenase/cyclohydrolase, mitochondrial OS=Mus musculus GN=Mthfd2 PE=1 SV=1	Mthfd2	0	0	0	0	3.05507e+06	3.05507e+06	2.98112e+06	3.60765e+06
Q9D883	2	2	229.18	Splicing factor U2AF 35 kDa subunit OS=Mus musculus GN=U2af1 PE=1 SV=4	U2af1	0	0	0	0	6.72302e+06	6.72302e+06	5.07029e+06	2.9958e+06
Q921H9	4	4	228.82	Cytochrome c oxidase assembly factor 7 OS=Mus musculus GN=Coa7 PE=1 SV=1	Coa7	0	0	0	0	1.97129e+06	1.97129e+06	1.64524e+06	2.04995e+06
P63154	5	5	228.18	Crooked neck-like protein 1 OS=Mus musculus GN=Crnkl1 PE=1 SV=1	Crnkl1	0	0	0	0	430144	430144	370302	152184
Q8BU11	4	4	225.79	TOX high mobility group box family member 4 OS=Mus musculus GN=Tox4 PE=1 SV=3	Tox4	0	0	0	0	2.29292e+06	2.29292e+06	1.58289e+06	2.09551e+06
Q91Z49	5	5	225.45	UAP56-interacting factor OS=Mus musculus GN=Fyttd1 PE=1 SV=1	Fyttd1	0	0	0	0	0	0	0	0
Q64368	4	4	224.84	Deleted in azoospermia-like OS=Mus musculus GN=Dazl PE=1 SV=1	Dazl	0	0	0	0	1.70861e+06	1.70861e+06	1.93726e+06	2.02181e+06
D3YXK1	3	3	223.92	Atherin OS=Mus musculus GN=Samd1 PE=1 SV=1	Samd1	0	0	0	0	405656	405656	368459	309531
O88286	4	4	222.74	Protein Wiz OS=Mus musculus GN=Wiz PE=1 SV=2	Wiz	0	0	0	0	535432	535432	615468	1.1647e+06
Q8CHC8	5	5	221.11	ADNP homeobox protein 2 OS=Mus musculus GN=Adnp2 PE=2 SV=2	Adnp2	0	0	0	0	487403	487403	747851	1.86864e+06
Q6PCM1	3	3	220.83	Lysine-specific demethylase 3A OS=Mus musculus GN=Kdm3a PE=1 SV=1	Kdm3a	0	0	0	0	846320	846320	753315	593708
Q9Z148	5	5	220.27	Histone-lysine N-methyltransferase EHMT2 OS=Mus musculus GN=Ehmt2 PE=1 SV=2	Ehmt2	0	0	0	0	762467	762467	473136	422223
Q9JK30	4	4	220.24	Origin recognition complex subunit 3 OS=Mus musculus GN=Orc3 PE=1 SV=1	Orc3	0	0	0	0	8452.4	8452.4	87327.4	274766
P15066	3	3	219.55	Transcription factor jun-D OS=Mus musculus GN=Jund PE=1 SV=1	Jund	0	0	0	0	2.86613e+06	2.86613e+06	2.20099e+06	2.15473e+06
O89090	2	2	216.69	Transcription factor Sp1 OS=Mus musculus GN=Sp1 PE=1 SV=2	Sp1	0	0	0	0	1.7309e+06	1.7309e+06	4.41919e+06	4.87499e+06
E9Q6W4	4	4	213.85	Zinc finger protein 296 OS=Mus musculus GN=Znf296 PE=1 SV=1	Znf296	0	0	0	0	661619	661619	773573	693864
P16332	5	5	213.34	Methylmalonyl-CoA mutase, mitochondrial OS=Mus musculus GN=Mut PE=1 SV=2	Mut	0	0	0	0	579024	579024	327364	509747
O88379	5	5	213.31	Bromodomain adjacent to zinc finger domain protein 1A OS=Mus musculus GN=Baz1a PE=1 SV=3	Baz1a	0	0	0	0	1.0985e+06	1.0985e+06	883566	822569
Q8BHS3	4	4	213.09	Pre-mRNA-splicing factor RBM22 OS=Mus musculus GN=Rbm22 PE=1 SV=1	Rbm22	0	0	0	0	1.20893e+06	1.20893e+06	1.16679e+06	1.17235e+06
P54103	4	4	213.08	DnaJ homolog subfamily C member 2 OS=Mus musculus GN=Dnajc2 PE=1 SV=2	Dnajc2	0	0	0	0	681264	681264	769982	823763
Q07133	4	4	212.69	Histone H1t OS=Mus musculus GN=Hist1h1t PE=1 SV=4	Hist1h1t	0	0	0	0	0	0	0	0
Q8QZV7	4	4	210.76	Protein asunder homolog OS=Mus musculus GN=Asun PE=1 SV=2	Asun	0	0	0	0	1.22122e+06	1.22122e+06	1.53043e+06	1.55522e+06
O08550	4	4	209.29	Histone-lysine N-methyltransferase 2B OS=Mus musculus GN=Kmt2b PE=1 SV=3	Kmt2b	0	0	0	0	496446	496446	420795	403986
Q8BP67	3	3	209.29	60S ribosomal protein L24 OS=Mus musculus GN=Rpl24 PE=1 SV=2	Rpl24	0	0	0	0	1.07741e+06	1.07741e+06	1.43158e+06	1.27307e+06
Q9D7H3	3	3	208.62	RNA 3'-terminal phosphate cyclase OS=Mus musculus GN=RtcA PE=1 SV=2	RtcA	0	0	0	0	148691	148691	213732	355505
Q7TNS8	4	4	206.88	Uncharacterized protein C17orf96 homolog OS=Mus musculus PE=2 SV=1	2SV	0	0	0	0	474824	474824	335784	246171
Q9QXA5	4	4	205.82	U6 snRNA-associated Sm-like protein LSm4 OS=Mus musculus GN=Lsm4 PE=1 SV=1	Lsm4	0	0	0	0	6.91684e+06	6.91684e+06	5.95595e+06	6.01187e+06
Q8BRB7	3	3	205.38	Histone acetyltransferase KAT6B OS=Mus musculus GN=Kat6b PE=1 SV=3	Kat6b	0	0	0	0	822767	822767	715644	721591
Q8BQR4	4	4	202.86	KAT8 regulatory NSL complex subunit 2 OS=Mus musculus GN=Kansl2 PE=1 SV=1	Kansl2	0	0	0	0	620913	620913	513412	563992
O70445	4	4	202.5	BRCA1-associated RING domain protein 1 OS=Mus musculus GN=Bard1 PE=2 SV=1	Bard1	0	0	0	0	2.44672e+06	2.44672e+06	2.15573e+06	2.32606e+06
Q5F2E7	4	4	202.33	Nuclear fragile X mental retardation-interacting protein 2 OS=Mus musculus GN=Nufip2 PE=1 SV=1	Nufip2	0	0	0	0	1.47142e+06	1.47142e+06	986327	1.06453e+06
Q8K202	4	4	201.71	DNA-directed RNA polymerase I subunit RPA49 OS=Mus musculus GN=Polr1e PE=1 SV=2	Polr1e	0	0	0	0	798214	798214	1.09212e+06	910967
Q61321	3	3	200.9	Homeobox protein SIX4 OS=Mus musculus GN=Six4 PE=1 SV=1	Six4	0	0	0	0	1.57135e+06	1.57135e+06	1.56077e+06	684030
A2A4P0	5	5	200.54	ATP-dependent RNA helicase DHX8 OS=Mus musculus GN=Dhx8 PE=2 SV=1	Dhx8	0	0	0	0	897765	897765	915076	829409
P97376	2	2	199.99	Protein FRG1 OS=Mus musculus GN=Frg1 PE=1 SV=2	Frg1	0	0	0	0	2.31953e+06	2.31953e+06	2.34216e+06	2.52436e+06
Q14AX6	4	4	199.75	Cyclin-dependent kinase 12 OS=Mus musculus GN=Cdk12 PE=1 SV=2	Cdk12	0	0	0	0	779918	779918	799568	361528
Q3URQ0	4	4	198.39	Testis-expressed sequence 10 protein OS=Mus musculus GN=Tex10 PE=1 SV=1	Tex10	0	0	0	0	523967	523967	486334	633017
Q3U1T3	3	3	197.46	Breast cancer metastasis-suppressor 1-like protein OS=Mus musculus GN=Brms1l PE=2 SV=1	Brms1l	0	0	0	0	1.44502e+06	1.44502e+06	1.50938e+06	757834
Q8BHJ5	3	3	196.03	F-box-like/WD repeat-containing protein TBL1XR1 OS=Mus musculus GN=Tbl1xr1 PE=1 SV=1	Tbl1xr1	0	0	0	0	544381	544381	516352	485271
Q8BZR9	3	3	195.6	Nuclear cap-binding protein subunit 3 OS=Mus musculus GN=Ncbp3 PE=1 SV=1	Ncbp3	0	0	0	0	423335	423335	260848	402742
Q8CJG0	3	3	195.23	Protein argonaute-2 OS=Mus musculus GN=Ago2 PE=1 SV=3	Ago2	0	0	0	0	406217	406217	517377	455843
Q9JLB0	3	3	193.17	MAGUK p55 subfamily member 6 OS=Mus musculus GN=Mpp6 PE=1 SV=1	Mpp6	0	0	0	0	483070	483070	483284	574614
[truncated: 601 more rows]
