# Supplementary material for: Distinct and diverse chromatin proteomes of ageing mouse organs reveal protein signatures that correlate with physiological functions
Source: eLife journal article supplement (doi:10.7554/elife.73524), 2022-03-08
Supplement: supp [file elife-73524-supp-v1.zip › elife_poa_e73524_Supplementary_file_2.xlsx]

## Sheet: Sheet2
						REPLICATES BRAIN TOTAL LYSATE
						3.1		3.2		3.3		5.1		5.2		5.3		10.1		10.2		10.3		15.1		15.2		15.3
Accession	Peptide count	Unique peptides	Confidence score	Description	name	QEHF2_03821_GO	QEHF2_03822_GO	QEHF2_03823_GO	QEHF2_03824_GO	QEHF2_03825_GO	QEHF2_03826_GO	QEHF2_03827_GO	QEHF2_03828_GO	QEHF2_03830_GO	QEHF2_03831_GO	QEHF2_03832_GO	QEHF2_03833_GO	QEHF2_03834_GO	QEHF2_03835_GO	QEHF2_03836_GO	QEHF2_03837_GO	QEHF2_03839_GO	QEHF2_03840_GO	QEHF2_03841_GO	QEHF2_03842_GO	QEHF2_03843_GO	QEHF2_03844_GO	QEHF2_03845_GO	QEHF2_03846_GO
Q8C878	2	2	122.66	NEDD8-activating enzyme E1 catalytic subunit OS=Mus musculus GN=Uba3 PE=1 SV=2	Uba3	16554.7	34940.4	16554.7	684106	28507.2	32694.5	312446	293908	762182	775270	661378	725689	483317	488112	647614	614115	481451	753211	1.19129e+06	1.38055e+06	633826	512280	1.99458e+06	1.85785e+06
Q9EQQ9	2	2	65.93	Protein O-GlcNAcase OS=Mus musculus GN=Mgea5 PE=1 SV=2	Mgea5	34303.3	48276.8	34303.3	12636.3	288314	25199.7	744488	648898	808484	1.29507e+06	344626	649643	379490	540468	489974	201354	407103	603766	375473	974409	674119	869638	514185	356284
Q9Z172	1	1	63	Small ubiquitin-related modifier 3 OS=Mus musculus GN=Sumo3 PE=1 SV=1	Sumo3	2.47887e+06	3.29146e+06	2.47887e+06	295929	667314	403284	0	0	0	0	0	0	0	0	0	0	0	0	0	0	0	0	0	0
P32067	2	2	126.11	Lupus La protein homolog OS=Mus musculus GN=Ssb PE=1 SV=1	Ssb	200222	277689	200222	501462	46937.6	46035.4	92423.4	160197	609632	831311	647521	618842	1.0466e+06	1.09379e+06	1.13973e+06	2.00328e+06	720629	1.16405e+06	1.92293e+06	2.61082e+06	1.40184e+06	1.77747e+06	2.92868e+06	4.0995e+06
Q9ESJ4	2	2	141.97	NCK-interacting protein with SH3 domain OS=Mus musculus GN=Nckipsd PE=1 SV=2	Nckipsd	549078	524366	549078	87657.6	12637.4	34960.8	0	0	0	0	0	0	0	0	0	0	0	0	0	0	0	0	0	0
Q61656	2	2	148.42	Probable ATP-dependent RNA helicase DDX5 OS=Mus musculus GN=Ddx5 PE=1 SV=2	Ddx5	547890	735310	547890	1.70651e+06	477452	581478	590595	627439	1.08977e+06	1.8068e+06	866113	777323	754918	702515	701074	890127	703269	1.05286e+06	1.76672e+06	2.15187e+06	1.47889e+06	1.14102e+06	1.93732e+06	2.30226e+06
Q9QYS9	2	2	97.99	Protein quaking OS=Mus musculus GN=Qki PE=1 SV=1	Qki	265172	511072	265172	537328	233156	221242	69829.3	322687	779936	1.04156e+06	950650	863329	295172	274176	395306	378569	243782	489561	669133	964729	472447	542236	1.7248e+06	1.72168e+06
Q61205	2	2	73.39	Platelet-activating factor acetylhydrolase IB subunit gamma OS=Mus musculus GN=Pafah1b3 PE=1 SV=1	Pafah1b3	29857.7	1090.1	29857.7	96021.3	124020	116356	220652	223870	2611.57	4074.71	26469.8	154951	115863	122079	168236	240232	24139.2	62832.1	32751	112669	1123.18	21797.3	410960	449390
Q501J6	2	2	65.56	Probable ATP-dependent RNA helicase DDX17 OS=Mus musculus GN=Ddx17 PE=1 SV=1	Ddx17	157759	173742	157759	4986.33	107181	94136.5	16480.7	54360.8	641358	880260	7656.14	33567.5	205550	134691	124274	162155	120742	309747	347752	890011	180596	159699	1.10471e+06	917994
P62500	1	1	53.27	TSC22 domain family protein 1 OS=Mus musculus GN=Tsc22d1 PE=1 SV=2	Tsc22d1	1.00092e+06	1.34777e+06	1.00092e+06	949186	1.30713e+06	1.23508e+06	0	0	0	0	0	0	0	0	0	0	0	0	0	0	0	0	0	0
P54728	1	1	34.59	UV excision repair protein RAD23 homolog B OS=Mus musculus GN=Rad23b PE=1 SV=2	Rad23b	1.10301e+06	1.58203e+06	1.10301e+06	4.38639e+06	3.3078e+06	2.70648e+06	702156	1.17935e+06	1.45869e+06	2.14315e+06	1.17562e+06	1.46959e+06	1.23442e+06	1.62495e+06	2.38478e+06	3.27263e+06	1.20062e+06	2.44108e+06	1.10291e+06	2.0261e+06	1.01235e+06	1.0247e+06	1.83872e+06	2.60197e+06
P62137	1	1	61.88	Serine/threonine-protein phosphatase PP1-alpha catalytic subunit OS=Mus musculus GN=Ppp1ca PE=1 SV=1	Ppp1ca	1.30522e+06	1.55033e+06	1.30522e+06	3.01292e+06	1.73226e+06	2.06351e+06	1.69211e+06	2.54047e+06	3.5836e+06	5.47446e+06	2.6748e+06	4.05525e+06	1.41537e+06	859029	2.79665e+06	3.88194e+06	1.43175e+06	2.42452e+06	3.23604e+06	3.46892e+06	3.19254e+06	3.54436e+06	6.14752e+06	6.53746e+06
Q9WUD1	1	1	42.32	STIP1 homology and U box-containing protein 1 OS=Mus musculus GN=Stub1 PE=1 SV=1	Stub1	670641	835934	670641	967353	928509	1.76393e+06	392881	65906.6	3893.5	2553.49	692155	612153	340733	339833	135451	16123.3	447925	378242	139254	21305.3	643270	305263	1.15678e+06	61186.3
P99026	1	1	70.17	Proteasome subunit beta type-4 OS=Mus musculus GN=Psmb4 PE=1 SV=1	Psmb4	109803	242459	109803	73455	248604	6053.28	174896	40926.1	975.248	4052.32	38580.8	73514	0	0	0	0	0	0	10.8297	0	346014	5330.51	2404.84	11907
Q9WUB4	1	1	25.06	Dynactin subunit 6 OS=Mus musculus GN=Dctn6 PE=1 SV=1	Dctn6	460388	448190	460388	1.13783e+06	1.06964e+06	1.10635e+06	0	0	0	0	0	0	620558	600262	465466	428759	622913	821394	943625	1.62929e+06	248300	514383	965785	1.05259e+06
P20444	1	1	40.8	Protein kinase C alpha type OS=Mus musculus GN=Prkca PE=1 SV=3	Prkca	225902	408861	225902	384090	222497	222783	251181	187753	120608	257942	406218	368691	137693	68839.9	107295	206705	112487	287042	298139	520376	118170	237816	294437	364469
P62869	1	1	50.99	Transcription elongation factor B polypeptide 2 OS=Mus musculus GN=Tceb2 PE=1 SV=1	Tceb2	1.801e+06	1.98489e+06	1.801e+06	3.58291e+06	2.0384e+06	1.89118e+06	51301.2	63332.2	1424.12	1985.36	2.01109e+06	1.89252e+06	419172	611887	118974	405594	1.08607e+06	704720	572015	540123	1.36715e+06	918877	349671	448177
Q06890	1	1	106.21	Clusterin OS=Mus musculus GN=Clu PE=1 SV=1	Clu	1.56117e+06	2.03439e+06	1.56117e+06	2.64252e+06	1.96133e+06	2.37855e+06	1.67863e+06	2.21171e+06	536024	638497	700270	1.04547e+06	1.47405e+06	1.2955e+06	2.79602e+06	3.63257e+06	1.65144e+06	2.53352e+06	1.55029e+06	1.58604e+06	1.4062e+06	1.11869e+06	3.20885e+06	2.73671e+06
Q9WV60	1	1	42.77	Glycogen synthase kinase-3 beta OS=Mus musculus GN=Gsk3b PE=1 SV=2	Gsk3b	845981	1.13818e+06	845981	302792	662002	380347	298526	421592	59594.9	94750.5	814556	1.06526e+06	829462	425156	343829	420186	1.10515e+06	1.79819e+06	0	0	0	0	0	0
Q9CQV6	1	1	31.97	Microtubule-associated proteins 1A/1B light chain 3B OS=Mus musculus GN=Map1lc3b PE=1 SV=3	Map1lc3b	1.60202e+06	1.88128e+06	1.60202e+06	467132	1.01443e+06	1.02442e+06	0	0	0	0	0	0	0	0	0	0	0	0	163108	220298	182929	140423	154324	151891
P84104	1	1	28.57	Serine/arginine-rich splicing factor 3 OS=Mus musculus GN=Srsf3 PE=1 SV=1	Srsf3	1.54311e+06	1.99286e+06	1.54311e+06	3.19826e+06	652631	1.17918e+06	1.79927e+06	1.25502e+06	574585	840921	649316	895637	825747	903891	865916	1.74644e+06	1.55641e+06	1.89843e+06	519878	681107	1.48055e+06	967413	1.06293e+06	1.38553e+06
P22752	2	2	72.34	Histone H2A type 1 OS=Mus musculus GN=Hist1h2ab PE=1 SV=3	Hist1h2ab	1.34555e+06	1.82668e+06	1.34555e+06	2.05859e+06	936419	1.21073e+06	1.7991e+06	2.33533e+06	4.19306e+06	4.73867e+06	2.55543e+06	2.64097e+06	2.47027e+06	2.74543e+06	2.65848e+06	416903	2.92803e+06	2.91259e+06	3.62595e+06	3.92869e+06	5.10648e+06	4.33634e+06	2.83985e+06	6.9346e+06
Q8VHL1	2	2	166.96	Histone-lysine N-methyltransferase SETD7 OS=Mus musculus GN=Setd7 PE=1 SV=2	Setd7	1.38532e+06	1.9012e+06	1.38532e+06	1.64221e+06	1.00833e+06	907435	450612	368402	504277	826368	740386	441452	1.60901e+06	1.91337e+06	1.68585e+06	1.18419e+06	617507	1.81379e+06	1.16133e+06	1.91534e+06	2.65368e+06	1.90428e+06	997929	2.74215e+06
P10853	2	1	108.53	Histone H2B type 1-F/J/L OS=Mus musculus GN=Hist1h2bf PE=1 SV=2	Hist1h2bf	44766.8	62967.7	44766.8	411140	48869.5	21729	77024.4	77677.4	9784.17	51299.6	380647	395176	484109	696306	289425	57118.6	176764	378577	727474	1.30869e+06	661545	976455	1.27609e+06	1.00286e+06
Q9WTX5	2	2	88.32	S-phase kinase-associated protein 1 OS=Mus musculus GN=Skp1 PE=1 SV=3	Skp1	216040	342368	216040	6.91065e+06	4.3977e+06	419593	0	0	0	0	0	0	0	0	0	0	0	0	0	0	0	0	0	0
P60766	2	2	104.17	Cell division control protein 42 homolog OS=Mus musculus GN=Cdc42 PE=1 SV=2	Cdc42	717684	691365	717684	154692	39887.5	19117.9	3.78326e+06	3.55012e+06	3.35834e+06	6.04623e+06	4.88547e+06	5.99842e+06	5.18252e+06	5.82399e+06	1.05761e+07	8.84215e+06	5.93724e+06	9.81194e+06	826.828	1269.94	336638	230079	728.964	1528.98
P62141	2	2	109.9	Serine/threonine-protein phosphatase PP1-beta catalytic subunit OS=Mus musculus GN=Ppp1cb PE=1 SV=3	Ppp1cb	481638	748196	481638	1.54348e+06	624944	1.02488e+06	773004	809212	625399	1.32017e+06	689086	885696	550006	357961	965848	1.47244e+06	470762	809297	406392	549974	249221	353843	1.0259e+06	777079
Q9CPX6	2	2	148.13	Ubiquitin-like-conjugating enzyme ATG3 OS=Mus musculus GN=Atg3 PE=1 SV=1	Atg3	982606	1.31686e+06	982606	1.40027e+06	1.02298e+06	1.04606e+06	250482	680317	1.31485e+06	1.93868e+06	1.18677e+06	1.28821e+06	602184	644480	631341	936819	332677	661007	792580	1.34947e+06	790691	876044	2.43179e+06	2.7336e+06
Q9CWK8	2	2	134.37	Sorting nexin-2 OS=Mus musculus GN=Snx2 PE=1 SV=2	Snx2	433807	673309	433807	474236	525138	430484	678139	605548	327033	550085	399992	677358	372041	446415	393788	601778	410940	527468	624379	736431	457308	486748	681960	689007
P68181	2	2	103.79	cAMP-dependent protein kinase catalytic subunit beta OS=Mus musculus GN=Prkacb PE=1 SV=2	Prkacb	365772	434042	365772	1.50149e+06	217997	581213	409220	467468	588160	832666	774702	1.04441e+06	332336	289919	482961	298867	623369	989548	367538	1.19765e+06	616306	600296	2.12254e+06	2.78379e+06
Q8VBW6	2	2	103.02	NEDD8-activating enzyme E1 regulatory subunit OS=Mus musculus GN=Nae1 PE=1 SV=1	Nae1	520003	886461	520003	1.70899e+06	754891	1.38008e+06	1.96195e+06	2.6082e+06	2.28816e+06	3.82616e+06	1.86524e+06	2.11144e+06	1.13748e+06	1.03902e+06	1.11e+06	1.50063e+06	886566	1.49937e+06	2.00967e+06	2.70617e+06	1.93434e+06	2.59568e+06	2.30682e+06	3.17854e+06
Q8BGD9	2	2	150.18	Eukaryotic translation initiation factor 4B OS=Mus musculus GN=Eif4b PE=1 SV=1	Eif4b	2.06913e+06	2.78946e+06	2.06913e+06	3.22469e+06	1.89857e+06	2.06334e+06	3.56471e+06	700629	1.1577e+06	1.88029e+06	3.75389e+06	2.26192e+06	1.00073e+06	1.37909e+06	975466	716573	756734	1.01114e+06	1.37596e+06	1.63928e+06	3.45773e+06	2.75286e+06	883425	1.26224e+06
P83940	2	2	251.39	Transcription elongation factor B polypeptide 1 OS=Mus musculus GN=Tceb1 PE=1 SV=1	Tceb1	546079	1.04295e+06	546079	1.73681e+06	853134	870157	2.25755e+06	1.67824e+06	190898	159806	77737.8	828113	558673	830428	293792	264392	940727	1.03762e+06	1.248e+06	1.9525e+06	2.18236e+06	1.6329e+06	945681	1.02974e+06
Q69Z98	2	2	87.72	Serine/threonine-protein kinase BRSK2 OS=Mus musculus GN=Brsk2 PE=1 SV=2	Brsk2	1.70566e+06	2.10502e+06	1.70566e+06	1.90804e+06	575662	708945	417545	606453	2.1874e+06	4.20151e+06	898249	1.16528e+06	56325	87361.8	23835.9	18812.9	164423	191447	357240	428810	363212	118807	208217	255226
Q60692	2	2	64.76	Proteasome subunit beta type-6 OS=Mus musculus GN=Psmb6 PE=1 SV=3	Psmb6	672269	973157	672269	2.43437e+06	974439	1.02512e+06	3.52852e+06	3.16329e+06	1.25742e+06	1.41149e+06	3.03207e+06	1.02811e+06	1.52303e+06	1.30856e+06	3.07103e+06	4.03088e+06	1.11966e+06	1.9101e+06	2.12743e+06	2.36123e+06	2.48702e+06	2.33729e+06	4.62006e+06	4.38052e+06
P70670	2	2	143.24	Nascent polypeptide-associated complex subunit alpha, muscle-specific form OS=Mus musculus GN=Naca PE=1 SV=2	Naca	246348	319736	246348	364846	234141	243782	731619	435119	270284	448998	386435	760085	646889	993417	332556	497177	378335	680665	982082	1.28179e+06	1.41946e+06	1.13911e+06	652060	52752.7
P43277	2	2	189.8	Histone H1.3 OS=Mus musculus GN=Hist1h1d PE=1 SV=2	Hist1h1d	1.1189e+06	1.46519e+06	1.1189e+06	5742.79	103714	30817.1	0	0	0	0	0	0	0	0	0	0	0	0	0	0	0	0	0	0
P29595	2	2	63.46	NEDD8 OS=Mus musculus GN=Nedd8 PE=1 SV=2	Nedd8	188251	271052	188251	952680	320021	361744	1.28279e+06	1.39191e+06	306968	578133	1.01065e+06	1.34504e+06	697093	819815	730030	1.42104e+06	197161	535807	1.30959e+06	2.038e+06	2.0818e+06	1.98703e+06	3.1403e+06	4.16519e+06
Q8WTY4	2	2	92.96	Anamorsin OS=Mus musculus GN=Ciapin1 PE=1 SV=1	Ciapin1	382671	328871	382671	44880.1	33013.1	111450	1.88108e+06	808719	1.4114e+06	2.54772e+06	1.99729e+06	2.43654e+06	1.18301e+06	1.15669e+06	840670	3.15194e+06	1.43695e+06	2.06201e+06	1.34977e+06	2.48757e+06	2.09497e+06	2.03881e+06	2.40457e+06	2.16264e+06
Q9R1P0	2	2	92.27	Proteasome subunit alpha type-4 OS=Mus musculus GN=Psma4 PE=1 SV=1	Psma4	176922	222072	176922	193217	59540	36936.4	170005	190097	17306.4	17034.7	168545	233067	55376.3	14368	461664	720566	13978	105741	231192	329105	132003	318377	1.02583e+06	1.02068e+06
Q9Z0Y1	2	2	167.49	Dynactin subunit 3 OS=Mus musculus GN=Dctn3 PE=1 SV=2	Dctn3	122958	114951	122958	102280	35337.8	101297	583962	396647	370868	622997	248760	308246	425393	395014	640246	941886	372962	821225	835092	1.06459e+06	694203	945078	758493	840013
Q8CBW3	2	2	83.77	Abl interactor 1 OS=Mus musculus GN=Abi1 PE=1 SV=3	Abi1	525896	649921	525896	532686	684809	778506	1.30923e+06	1.53351e+06	976249	1.48716e+06	935557	943005	416504	254801	1.08769e+06	1.84756e+06	311794	609865	858415	771854	785649	1.08521e+06	1.00624e+06	937339
Q9DBC7	2	2	165.75	cAMP-dependent protein kinase type I-alpha regulatory subunit OS=Mus musculus GN=Prkar1a PE=1 SV=3	Prkar1a	268755	335229	268755	569478	362088	467046	192866	724865	197065	266442	418301	444784	255878	259455	177607	337560	205308	371529	807216	823320	853048	693952	1.16665e+06	1.3219e+06
P63280	2	2	94.34	SUMO-conjugating enzyme UBC9 OS=Mus musculus GN=Ube2i PE=1 SV=1	Ube2i	236449	358116	236449	1.13196e+06	401793	427628	327710	538580	40359	80859.1	324693	284955	709511	404735	556738	1.24504e+06	666828	1.21569e+06	193180	423015	245431	281179	202668	301104
Q8K2B3	2	2	109.89	Succinate dehydrogenase [ubiquinone] flavoprotein subunit, mitochondrial OS=Mus musculus GN=Sdha PE=1 SV=1	Sdha	1.73194e+06	1.93355e+06	1.73194e+06	1.46668e+06	993375	544717	264037	285552	1.00293e+06	1.40149e+06	2.00624e+06	2.53615e+06	710527	998373	720849	993191	563799	703550	1.42289e+06	1.86319e+06	1.26579e+06	1.29627e+06	1.00141e+06	1.04493e+06
Q9CZY3	2	2	87.34	Ubiquitin-conjugating enzyme E2 variant 1 OS=Mus musculus GN=Ube2v1 PE=1 SV=1	Ube2v1	447319	416840	447319	503445	1.18388e+06	1.33551e+06	1.53417e+06	1.19842e+06	244749	279922	38096.5	37396.3	481244	457471	41287	17557.3	478131	728607	203459	161753	1.13721e+06	690949	58221.3	62915.3
Q9Z0J4	1	1	70.69	Nitric oxide synthase, brain OS=Mus musculus GN=Nos1 PE=1 SV=1	Nos1	228283	367027	228283	1.54592e+06	179000	157854	519446	220337	1.3604e+06	1.65657e+06	737082	198706	698760	851220	1.40262e+06	968093	638328	874268	1.89516e+06	1.7261e+06	4.1856e+06	2.87927e+06	936498	124161
Q60780	1	1	46.45	Growth arrest-specific protein 7 OS=Mus musculus GN=Gas7 PE=1 SV=1	Gas7	224471	132395	224471	12187.4	94824.3	15333.9	784968	1.01046e+06	1.08804e+06	1.90351e+06	1.10649e+06	874184	1.06911e+06	1.124e+06	1.4106e+06	2.02403e+06	842822	1.65471e+06	951021	1.52185e+06	1.86912e+06	1.87393e+06	1.48525e+06	2.63005e+06
Q3TXS7	1	1	30.94	26S proteasome non-ATPase regulatory subunit 1 OS=Mus musculus GN=Psmd1 PE=1 SV=1	Psmd1	1.10267e+06	1.61998e+06	1.10267e+06	55073.1	53772.6	93597.8	32643.1	49757.2	36420.3	102049	148077	267436	324923	368463	474494	680947	166122	268516	413219	593900	876338	543470	91188.4	11695
P58871	1	1	34.02	182 kDa tankyrase-1-binding protein OS=Mus musculus GN=Tnks1bp1 PE=1 SV=2	Tnks1bp1	66950.5	66486.6	66950.5	208790	85926	47154	5483.28	6090.1	285615	532957	250921	129923	217630	219536	120684	187080	144959	215269	0	0	0	0	0	0
Q9R1P3	1	1	35.48	Proteasome subunit beta type-2 OS=Mus musculus GN=Psmb2 PE=1 SV=1	Psmb2	61334.2	52823.6	61334.2	229535	9277.02	29880.2	854071	487124	560267	975794	1.13222e+06	1.2802e+06	784538	529369	1.03342e+06	1.16987e+06	667803	1.43512e+06	153654	469356	24258.5	44123.3	1.00243e+06	1.19618e+06
Q99LD4	1	1	59.68	COP9 signalosome complex subunit 1 OS=Mus musculus GN=Gps1 PE=1 SV=1	Gps1	2624	1013.33	2624	954693	17981.6	29.1727	1.13574e+06	859284	1.47175e+06	1.80851e+06	2.42133e+06	1.833e+06	1.92739e+06	1.14632e+06	1.08107e+06	1.3996e+06	1.12414e+06	1.33137e+06	1.90408e+06	2.64308e+06	2.40823e+06	1.47458e+06	1.76914e+06	1.37058e+06
Q91VF2	1	1	49.95	Histamine N-methyltransferase OS=Mus musculus GN=Hnmt PE=1 SV=1	Hnmt	5104.18	5850.28	5104.18	25787.5	61078	305.533	1.86156e+06	1.53337e+06	873914	1.33542e+06	22683.7	57897.4	1.17389e+06	2.01923e+06	1.94927e+06	2.58966e+06	1.26239e+06	2.20049e+06	0	0	0	0	0	0
P97822	1	1	34.34	Acidic leucine-rich nuclear phosphoprotein 32 family member E OS=Mus musculus GN=Anp32e PE=1 SV=2	Anp32e	5351.93	14308.3	5351.93	790498	258566	55092.4	3.74629e+06	3.6658e+06	2.09075e+06	2.9137e+06	1.85157e+06	1.88721e+06	1.95186e+06	2.70921e+06	3.03769e+06	7.6651e+06	1.53778e+06	2.28308e+06	2.31377e+06	3.64882e+06	3.12758e+06	4.18867e+06	4.60064e+06	6.11973e+06
P14685	1	1	40.96	26S proteasome non-ATPase regulatory subunit 3 OS=Mus musculus GN=Psmd3 PE=1 SV=3	Psmd3	74944	256811	74944	317131	77810.2	79818.7	17592.4	24088.5	10036.6	0	233885	265791	40335	62561.3	31756.8	77969.2	144608	148558	0	0	0	0	0	0
P70444	1	1	31.35	BH3-interacting domain death agonist OS=Mus musculus GN=Bid PE=1 SV=2	Bid	258471	147237	258471	242796	46685.3	243330	349679	274221	496527	733863	170296	281651	201380	181697	162042	252041	88620	209127	167882	280429	225843	368875	541613	334430
O08583	1	1	28.65	THO complex subunit 4 OS=Mus musculus GN=Alyref PE=1 SV=3	Alyref	75062.5	82191.6	75062.5	6248.77	93544.1	25936.4	1.06637e+06	4.7863e+06	899745	1.54786e+06	1.18177e+06	1.68491e+06	0	0	0	0	0	0	1.20205e+06	1.52517e+06	2.67707e+06	2.33226e+06	797279	162722
Q8CGA0	1	1	49.9	Protein phosphatase 1F OS=Mus musculus GN=Ppm1f PE=1 SV=1	Ppm1f	4139.15	20493	4139.15	66495.7	309607	364161	468885	441107	122927	193580	256486	269277	220094	285000	256346	728748	134007	192175	387431	393520	184246	534697	377660	601647
P0C0S6	1	1	48.31	Histone H2A.Z OS=Mus musculus GN=H2afz PE=1 SV=2	H2afz	145718	213543	145718	1.48866e+06	84728.5	94514.1	840808	272491	2.09536e+06	1.72277e+06	1.59911e+06	1.23182e+06	554645	362010	573101	304392	639917	686166	1.55901e+06	1.0208e+06	1.44014e+06	1.23505e+06	3.32907e+06	37630.8
Q99LT0	1	1	82.5	Protein dpy-30 homolog OS=Mus musculus GN=Dpy30 PE=1 SV=1	Dpy30	76286.1	126317	76286.1	786833	93710.1	185819	1.04528e+06	2.02303e+06	2.23116e+06	2.54137e+06	1.3491e+06	1.41254e+06	1.32364e+06	1.70711e+06	3.52694e+06	3.58854e+06	724827	677403	1.50164e+06	1.49063e+06	3.99059e+06	3.16506e+06	3.78531e+06	2.17816e+06
P47934	1	1	27.92	Carnitine O-acetyltransferase OS=Mus musculus GN=Crat PE=1 SV=3	Crat	2506.54	0	2506.54	1700.33	8231.79	0	0	0	0	0	0	0	39839.8	31781.1	100751	170996	43495.2	68073.4	25800.9	0	0	0	6035.11	0
P97372	1	1	32.22	Proteasome activator complex subunit 2 OS=Mus musculus GN=Psme2 PE=1 SV=4	Psme2	0	0	0	0	97134.7	0	999023	1.04688e+06	1.31351e+06	1.55738e+06	1.71185e+06	1.83817e+06	27910.9	21832.5	250.83	515.314	90958.1	24897.1	0	0	0	0	0	0
P63325	1	1	57.25	40S ribosomal protein S10 OS=Mus musculus GN=Rps10 PE=1 SV=1	Rps10	22.4864	0	22.4864	307994	924.178	1084.06	30502.1	225218	348423	563445	568453	38234.2	225363	309118	239158	39124.6	143586	190953	528169	634330	702659	782121	689953	908357
Q08642	1	1	41.04	Protein-arginine deiminase type-2 OS=Mus musculus GN=Padi2 PE=1 SV=2	Padi2	6569.59	16434.1	6569.59	221372	7116.67	58795.4	160307	133362	153790	310885	238188	654498	0	0	0	0	0	0	414393	575908	797726	960200	203887	19992.4
P60122	1	1	26.09	RuvB-like 1 OS=Mus musculus GN=Ruvbl1 PE=1 SV=1	Ruvbl1	0	0	0	209811	4552.93	3949.15	0	0	0	0	0	0	512475	602015	210737	717968	281115	400973	1.06587e+06	1.57572e+06	1.13451e+06	1.27749e+06	1.79393e+06	1.84576e+06
P62320	1	1	46.38	Small nuclear ribonucleoprotein Sm D3 OS=Mus musculus GN=Snrpd3 PE=1 SV=1	Snrpd3	10111	22018.8	10111	317080	6856.7	24832.5	212600	194448	5658.31	1564	269891	199883	127091	103608	119877	220814	218367	291711	199877	145596	84902	184830	123398	219850
Q9WTX6	1	1	29.35	Cullin-1 OS=Mus musculus GN=Cul1 PE=1 SV=1	Cul1	2987.22	11802.4	2987.22	178996	46598.4	37867	9173.47	15577.3	253637	311090	68954.2	81443.1	301256	317297	759996	98790.6	236029	299363	124133	213768	100751	77012.9	215476	299171
O35593	1	1	31.68	26S proteasome non-ATPase regulatory subunit 14 OS=Mus musculus GN=Psmd14 PE=1 SV=2	Psmd14	53880.1	33469	53880.1	20339.4	148035	154563	0	0	0	0	0	0	594016	893470	529758	206347	406794	533391	1.29903e+06	1.66284e+06	1.20446e+06	1.15422e+06	719399	108023
Q8BL97	1	1	65.32	Serine/arginine-rich splicing factor 7 OS=Mus musculus GN=Srsf7 PE=1 SV=1	Srsf7	112435	94498.6	112435	405870	22870.1	29933.7	460975	0	0	0	14340.6	22927	533815	388861	421293	607238	826868	978936	749993	965151	1.7756e+06	1.19883e+06	766549	1.09714e+06
P70175	1	1	73.21	Disks large homolog 3 OS=Mus musculus GN=Dlg3 PE=1 SV=1	Dlg3	325762	455937	325762	37877.8	241693	5293.62	0	0	16796.8	29547.4	0	0	0	0	0	0	0	0	114432	209536	280500	408859	131985	299230
Q9D4H8	1	1	83.88	Cullin-2 OS=Mus musculus GN=Cul2 PE=1 SV=2	Cul2	511581	669937	511581	12592.8	402777	106450	0	0	0	0	0	0	292560	297197	405072	819441	195340	414698	0	0	0	0	0	0
Q9JMG7	1	1	39.72	Hepatoma-derived growth factor-related protein 3 OS=Mus musculus GN=Hdgfrp3 PE=1 SV=2	Hdgfrp3	200751	416211	200751	355850	248267	405483	0	0	0	0	0	0	0	0	0	0	0	0	0	0	0	0	0	0
P46935	1	1	27.1	E3 ubiquitin-protein ligase NEDD4 OS=Mus musculus GN=Nedd4 PE=1 SV=3	Nedd4	825812	1.00966e+06	825812	818746	316982	633933	136827	472275	98697.3	573750	414232	583114	0	0	0	0	0	0	0	0	0	0	0	0
P50580	1	1	32.62	Proliferation-associated protein 2G4 OS=Mus musculus GN=Pa2g4 PE=1 SV=3	Pa2g4	192777	230863	192777	294385	175708	208416	0	0	0	0	0	0	22568.7	20632	219.399	2243.76	47887.2	43352	0	0	0	0	0	0
Q9Z1X4	1	1	29.6	Interleukin enhancer-binding factor 3 OS=Mus musculus GN=Ilf3 PE=1 SV=2	Ilf3	478682	647126	478682	967765	714131	897779	1.22224e+06	650401	1.43255e+06	1.81741e+06	468030	928337	0	0	0	0	0	0	230038	1.51793e+06	652640	716277	2.07209e+06	1.34376e+06
Q91VR7	1	1	39.36	Microtubule-associated proteins 1A/1B light chain 3A OS=Mus musculus GN=Map1lc3a PE=1 SV=1	Map1lc3a	173403	281017	173403	659597	546046	923154	1.34363e+06	1.12724e+06	1.16496e+06	1.91549e+06	853325	1.35998e+06	410319	510990	554827	1.00614e+06	209194	377575	2.73501e+06	5.00333e+06	2.21715e+06	2.39499e+06	9.35017e+06	7.43728e+06
Q9DCG9	1	1	61.11	Multifunctional methyltransferase subunit TRM112-like protein OS=Mus musculus GN=Trmt112 PE=1 SV=1	Trmt112	919855	1.39694e+06	919855	1.61572e+06	671837	854972	0	0	0	0	0	0	0	0	0	0	0	0	0	0	0	0	0	0
O88543	1	1	46.93	COP9 signalosome complex subunit 3 OS=Mus musculus GN=Cops3 PE=1 SV=3	Cops3	1.13414e+06	363043	1.13414e+06	2.35903e+06	62860.5	1.321e+06	0	0	0	0	0	0	627236	537638	354921	394829	528233	950650	270815	601983	327992	339309	723313	783973
P68037	1	1	24.3	Ubiquitin-conjugating enzyme E2 L3 OS=Mus musculus GN=Ube2l3 PE=1 SV=1	Ube2l3	327617	447078	327617	1.56686e+06	852971	1.01883e+06	1.72255e+06	1.28878e+06	2.36434e+06	4.12654e+06	2.44002e+06	2.53993e+06	3.89954e+06	3.52732e+06	3.93055e+06	8.0486e+06	2.05554e+06	4.68809e+06	4.03638e+06	5.15965e+06	4.04074e+06	4.85064e+06	7.64871e+06	7.52504e+06
Q61831	1	1	41.9	Mitogen-activated protein kinase 10 OS=Mus musculus GN=Mapk10 PE=1 SV=2	Mapk10	197539	263698	197539	265575	196149	186949	201763	198192	3101.12	22000.8	184779	249342	60625.3	33142.5	14525.6	53966.2	114252	144433	19704.9	120602	33042.9	118312	36358.5	124101
Q9WVJ2	1	1	28.61	26S proteasome non-ATPase regulatory subunit 13 OS=Mus musculus GN=Psmd13 PE=1 SV=1	Psmd13	150332	323549	150332	858050	504523	708342	1.41118e+06	1.29534e+06	1.54986e+06	2.08592e+06	1.75865e+06	1.90894e+06	833519	967186	701440	822353	626263	890697	691583	1.17108e+06	289972	608330	1.03793e+06	1.5061e+06
Q6A4J8	1	1	35.4	Ubiquitin carboxyl-terminal hydrolase 7 OS=Mus musculus GN=Usp7 PE=1 SV=1	Usp7	113022	220311	113022	199362	120224	134059	0	0	0	0	0	0	328597	251864	277468	257470	294086	434851	109151	217149	8223.08	50051	105254	120166
Q8C7M3	1	1	54.42	E3 ubiquitin-protein ligase TRIM9 OS=Mus musculus GN=Trim9 PE=1 SV=2	Trim9	429979	681535	429979	57486.7	319875	291079	0	0	0	0	0	0	0	0	0	0	0	0	0	0	0	0	0	0
Q9CQF3	1	1	64.41	Cleavage and polyadenylation specificity factor subunit 5 OS=Mus musculus GN=Nudt21 PE=1 SV=1	Nudt21	26016.2	150582	26016.2	839405	122780	325785	1.01318e+06	121236	873452	1.09249e+06	362828	440805	694213	233635	643123	1.02578e+06	810347	1.46363e+06	1.01443e+06	1.36752e+06	622922	1.29261e+06	1.49678e+06	1.6234e+06
Q3UYG8	1	1	21.58	O-acetyl-ADP-ribose deacetylase MACROD2 OS=Mus musculus GN=Macrod2 PE=1 SV=1	Macrod2	345419	479761	345419	200404	493001	4.73407e+06	0	0	0	0	0	0	466985	493870	161303	415484	453124	587195	897337	1.41424e+06	3.69747e+06	3.56146e+06	795106	26406.7
Q2TBE6	1	1	28.62	Phosphatidylinositol 4-kinase type 2-alpha OS=Mus musculus GN=Pi4k2a PE=1 SV=1	Pi4k2a	328425	129192	328425	37816.6	36801.6	3761.13	0	0	0	0	0	0	1.34705e+07	1.25152e+07	1.44458e+07	69410.5	1.00521e+07	1.45099e+07	0	0	0	0	0	0
Q8BK67	1	1	108.41	Protein RCC2 OS=Mus musculus GN=Rcc2 PE=1 SV=1	Rcc2	331319	509283	331319	13406.7	277105	444638	0	0	0	0	0	0	0	0	0	0	0	0	0	0	0	0	0	0
Q8R1Q8	7	7	459.56	Cytoplasmic dynein 1 light intermediate chain 1 OS=Mus musculus GN=Dync1li1 PE=1 SV=1	Dync1li1	416619	696589	416619	1.16601e+06	692469	961693	1.44454e+06	1.32228e+06	834333	1.33397e+06	953397	1.23086e+06	1.97194e+06	2.17495e+06	2.13152e+06	4.8233e+06	761230	1.51398e+06	3.51007e+06	3.90872e+06	4.53934e+06	3.95671e+06	3.07832e+06	3.42335e+06
P35486	7	7	348.22	Pyruvate dehydrogenase E1 component subunit alpha, somatic form, mitochondrial OS=Mus musculus GN=Pdha1 PE=1 SV=1	Pdha1	1.24373e+06	1.74271e+06	1.24373e+06	3.6752e+06	1.95792e+06	2.23146e+06	3.15706e+06	2.52405e+06	4.06723e+06	6.55482e+06	5.11361e+06	5.35876e+06	2.13358e+06	2.64682e+06	2.18728e+06	3.78163e+06	2.01481e+06	3.42381e+06	3.95138e+06	5.84898e+06	3.91773e+06	3.6806e+06	5.0932e+06	6.10331e+06
Q3THK7	7	7	354.8	GMP synthase [glutamine-hydrolyzing] OS=Mus musculus GN=Gmps PE=1 SV=2	Gmps	1.82718e+06	2.0156e+06	1.82718e+06	3.15385e+06	1.52681e+06	1.88263e+06	1.6312e+06	1.32708e+06	3.34136e+06	5.21611e+06	2.6745e+06	3.11004e+06	1.947e+06	2.36318e+06	1.9629e+06	3.20179e+06	1.63364e+06	2.81938e+06	3.09931e+06	4.28515e+06	2.85634e+06	3.52799e+06	6.01986e+06	5.22773e+06
Q63844	8	8	449.09	Mitogen-activated protein kinase 3 OS=Mus musculus GN=Mapk3 PE=1 SV=5	Mapk3	1.96173e+06	2.9388e+06	1.96173e+06	4.06741e+06	2.45966e+06	2.37432e+06	2.06729e+06	4.18537e+06	4.99483e+06	6.43514e+06	5.5375e+06	5.84435e+06	2.70635e+06	2.45177e+06	4.82143e+06	5.50671e+06	2.6791e+06	4.92024e+06	3.78402e+06	6.00199e+06	3.48489e+06	4.23882e+06	7.91621e+06	7.40509e+06
P63001	8	8	669.34	Ras-related C3 botulinum toxin substrate 1 OS=Mus musculus GN=Rac1 PE=1 SV=1	Rac1	5.01079e+06	6.14886e+06	5.01079e+06	1.24049e+07	5.82968e+06	6.5034e+06	5.50477e+06	8.4419e+06	4.3424e+06	6.91728e+06	6.58608e+06	6.04551e+06	4.61311e+06	4.23879e+06	3.74383e+06	5.21805e+06	3.20548e+06	5.69009e+06	6.86929e+06	8.73809e+06	9.27751e+06	8.21869e+06	1.01532e+07	1.18345e+07
P20029	8	8	567.97	78 kDa glucose-regulated protein OS=Mus musculus GN=Hspa5 PE=1 SV=3	Hspa5	3.68638e+06	4.60943e+06	3.68638e+06	6.09354e+06	3.61629e+06	4.67534e+06	5.99965e+06	4.52082e+06	5.87045e+06	9.61668e+06	9.9134e+06	9.7824e+06	4.31725e+06	4.81812e+06	4.97382e+06	5.83445e+06	2.75988e+06	4.32731e+06	4.77633e+06	8.51285e+06	5.30888e+06	5.01205e+06	1.12004e+07	1.18667e+07
P45591	8	8	493.43	Cofilin-2 OS=Mus musculus GN=Cfl2 PE=1 SV=1	Cfl2	1.49194e+07	1.91317e+07	1.49194e+07	1.53194e+07	1.10356e+07	1.45948e+07	1.91796e+07	2.16941e+07	2.73279e+06	4.14743e+06	1.21944e+07	1.62648e+07	2.74814e+06	3.66245e+06	2.09861e+06	3.10361e+06	4.15904e+06	4.13959e+06	4.41485e+06	7.28937e+06	1.81944e+07	1.16743e+07	4.36915e+06	6.80787e+06
P70296	8	8	700.1	Phosphatidylethanolamine-binding protein 1 OS=Mus musculus GN=Pebp1 PE=1 SV=3	Pebp1	5.5918e+07	7.71887e+07	5.5918e+07	7.54912e+07	3.35992e+07	5.07743e+07	5.2568e+07	5.5868e+07	5.75233e+07	8.55433e+07	9.43704e+07	9.18163e+07	3.11719e+07	4.42406e+07	3.7741e+07	4.09134e+07	3.73014e+07	5.89165e+07	3.26285e+07	8.0366e+07	5.18947e+07	4.01009e+07	6.59275e+07	8.88822e+07
Q9D051	8	8	530.06	Pyruvate dehydrogenase E1 component subunit beta, mitochondrial OS=Mus musculus GN=Pdhb PE=1 SV=1	Pdhb	7.23288e+06	9.59524e+06	7.23288e+06	1.10785e+07	8.88068e+06	1.01497e+07	8.68387e+06	7.22008e+06	1.13046e+07	1.73476e+07	1.16391e+07	1.43627e+07	8.2867e+06	1.14276e+07	8.1514e+06	6.48521e+06	6.64477e+06	1.01615e+07	1.1406e+07	1.36327e+07	1.01378e+07	8.34102e+06	2.0453e+07	2.6669e+07
O55042	7	7	846.34	Alpha-synuclein OS=Mus musculus GN=Snca PE=1 SV=2	Snca	2.23836e+07	2.98287e+07	2.23836e+07	4.636e+07	2.05483e+07	1.92478e+07	5.85325e+07	6.24352e+07	5.0264e+07	9.44793e+07	2.45382e+07	3.3914e+07	2.05069e+07	1.85677e+07	2.68927e+07	5.47529e+07	2.15891e+07	4.86777e+07	3.22834e+07	5.40956e+07	3.43467e+07	4.64943e+07	5.08546e+07	6.26792e+07
P23506	7	7	528.07	Protein-L-isoaspartate(D-aspartate) O-methyltransferase OS=Mus musculus GN=Pcmt1 PE=1 SV=3	Pcmt1	2.44252e+07	3.20367e+07	2.44252e+07	2.54113e+07	1.96524e+07	2.32809e+07	8.93603e+06	6.53293e+06	9.3118e+06	1.66796e+07	1.50447e+07	2.0281e+07	1.69043e+07	1.90837e+07	1.31321e+07	8.51769e+06	1.1571e+07	1.89686e+07	2.44972e+07	3.18053e+07	2.18768e+07	1.96951e+07	3.82106e+07	3.80182e+07
P63101	8	8	457.84	14-3-3 protein zeta/delta OS=Mus musculus GN=Ywhaz PE=1 SV=1	Ywhaz	5.43682e+07	7.54696e+07	5.43682e+07	1.28314e+08	6.78235e+07	1.04942e+08	1.24923e+08	1.11242e+08	1.56712e+08	2.12308e+08	1.52096e+08	1.47077e+08	8.26033e+07	7.87546e+07	1.3621e+08	1.68228e+08	6.03525e+07	8.20688e+07	1.1266e+08	1.6751e+08	1.21703e+08	1.01278e+08	2.27051e+08	1.84699e+08
Q7TMK9	8	8	414.48	Heterogeneous nuclear ribonucleoprotein Q OS=Mus musculus GN=Syncrip PE=1 SV=2	Syncrip	760599	989722	760599	1.64076e+06	1.00212e+06	945405	207072	193354	61339.4	89807.6	134451	259163	966800	1.19371e+06	1.41763e+06	1.25877e+06	1.09298e+06	1.48565e+06	1.10705e+06	2.71456e+06	1.67013e+06	1.57587e+06	4.154e+06	3.78875e+06
O08749	8	8	449.79	Dihydrolipoyl dehydrogenase, mitochondrial OS=Mus musculus GN=Dld PE=1 SV=2	Dld	1.36295e+06	1.72731e+06	1.36295e+06	5.01034e+06	3.37311e+06	3.0461e+06	3.31788e+06	5.41104e+06	7.00684e+06	9.77737e+06	7.65466e+06	9.4238e+06	2.66084e+06	3.13906e+06	2.74206e+06	1.22567e+06	3.19414e+06	4.18331e+06	6.79496e+06	6.82513e+06	3.1979e+06	2.61969e+06	8.86166e+06	8.15439e+06
O88544	8	8	371.1	COP9 signalosome complex subunit 4 OS=Mus musculus GN=Cops4 PE=1 SV=1	Cops4	660935	1.35761e+06	660935	1.55655e+06	1.3633e+06	1.45119e+06	1.9454e+06	1.68411e+06	3.77575e+06	5.2975e+06	2.64921e+06	3.12856e+06	1.9848e+06	2.23135e+06	2.35662e+06	3.51995e+06	1.28533e+06	2.34635e+06	2.66818e+06	3.42777e+06	2.97048e+06	3.23821e+06	3.32861e+06	3.26104e+06
Q6ZPJ3	5	5	351.45	(E3-independent) E2 ubiquitin-conjugating enzyme UBE2O OS=Mus musculus GN=Ube2o PE=1 SV=3	Ube2o	2.52429e+06	3.22036e+06	2.52429e+06	4.19254e+06	2.20815e+06	2.50564e+06	4.42004e+06	4.42668e+06	1.25285e+06	1.959e+06	3.46269e+06	5.1781e+06	2.16536e+06	1.62575e+06	2.16118e+06	3.14507e+06	2.35146e+06	3.87819e+06	3.97266e+06	5.4333e+06	2.82472e+06	3.79896e+06	3.60566e+06	4.69297e+06
Q9CZ13	5	5	392.7	Cytochrome b-c1 complex subunit 1, mitochondrial OS=Mus musculus GN=Uqcrc1 PE=1 SV=2	Uqcrc1	1.11831e+06	1.6085e+06	1.11831e+06	3.63161e+06	6.0215e+06	6.30183e+06	7.29346e+06	8.31863e+06	5.17296e+06	9.29401e+06	5.40239e+06	5.77423e+06	6.08265e+06	7.33697e+06	5.87049e+06	1.22052e+07	2.8365e+06	5.16687e+06	5.65973e+06	1.0675e+07	6.98701e+06	1.03848e+07	1.02817e+07	1.21262e+07
Q9Z2U1	5	5	373.76	Proteasome subunit alpha type-5 OS=Mus musculus GN=Psma5 PE=1 SV=1	Psma5	3.91523e+06	5.51881e+06	3.91523e+06	5.56555e+06	2.33069e+06	3.87688e+06	4.32435e+06	5.70837e+06	498497	522219	3.34694e+06	4.08064e+06	2.5292e+06	3.86504e+06	2.7995e+06	3.12927e+06	2.33522e+06	3.38385e+06	3.0844e+06	3.42656e+06	5.60917e+06	4.11448e+06	4.59445e+06	6.62861e+06
P46638	5	5	318.51	Ras-related protein Rab-11B OS=Mus musculus GN=Rab11b PE=1 SV=3	Rab11b	922921	1.72283e+06	922921	1.16485e+06	1.33646e+06	1.50696e+06	1.45048e+06	2.02237e+06	548958	1.04165e+06	505518	928105	502304	901084	772977	1.29153e+06	325915	500812	374997	808484	1.27206e+06	1.55933e+06	1.77073e+06	2.15546e+06
O88685	5	4	343.74	26S protease regulatory subunit 6A OS=Mus musculus GN=Psmc3 PE=1 SV=2	Psmc3	1.08757e+06	1.54731e+06	1.08757e+06	3.43505e+06	1.68933e+06	2.23531e+06	2.66926e+06	2.31204e+06	2.30976e+06	3.58061e+06	2.47634e+06	2.95112e+06	2.68431e+06	2.4918e+06	2.94965e+06	4.21951e+06	1.51407e+06	2.94689e+06	2.93954e+06	5.08717e+06	3.85218e+06	3.1309e+06	8.29093e+06	9.69808e+06
Q8K3H0	5	5	322.43	DCC-interacting protein 13-alpha OS=Mus musculus GN=Appl1 PE=1 SV=1	Appl1	2.1459e+06	2.72479e+06	2.1459e+06	3.98247e+06	2.46768e+06	2.68407e+06	2.95808e+06	3.60056e+06	4.19028e+06	6.236e+06	4.36989e+06	3.16477e+06	3.35244e+06	3.6525e+06	3.53075e+06	4.45967e+06	2.3745e+06	3.49581e+06	4.2097e+06	7.27727e+06	4.16476e+06	3.38321e+06	6.57344e+06	8.0218e+06
Q9D2M8	5	5	241.59	Ubiquitin-conjugating enzyme E2 variant 2 OS=Mus musculus GN=Ube2v2 PE=1 SV=4	Ube2v2	3.16354e+06	3.94755e+06	3.16354e+06	2.12917e+06	1.82195e+06	1.98237e+06	966831	1.18103e+06	683566	1.10378e+06	1.8696e+06	1.98517e+06	1.42227e+06	1.3411e+06	928772	1.05953e+06	838185	1.70355e+06	950360	1.4298e+06	312765	236131	302562	997467
Q9EQH3	5	5	255.34	Vacuolar protein sorting-associated protein 35 OS=Mus musculus GN=Vps35 PE=1 SV=1	Vps35	2.68415e+06	3.36932e+06	2.68415e+06	4.82275e+06	2.29033e+06	3.18327e+06	3.81247e+06	4.3104e+06	3.47547e+06	5.78099e+06	4.47656e+06	4.62949e+06	3.21686e+06	3.1185e+06	4.01517e+06	5.20169e+06	2.57194e+06	4.34989e+06	5.0284e+06	8.04182e+06	4.99411e+06	4.22382e+06	7.3756e+06	9.32651e+06
Q9CZ44	5	5	244.41	NSFL1 cofactor p47 OS=Mus musculus GN=Nsfl1c PE=1 SV=1	Nsfl1c	2.47001e+06	3.14841e+06	2.47001e+06	2.81025e+06	1.17645e+06	1.25178e+06	3.02799e+06	3.44916e+06	2.7405e+06	4.51845e+06	2.54419e+06	4.48905e+06	2.84011e+06	3.15704e+06	2.67517e+06	3.59629e+06	2.55323e+06	4.14423e+06	1.65748e+06	2.7269e+06	4.16485e+06	2.84674e+06	2.59564e+06	4.00847e+06
O88485	6	6	361.98	Cytoplasmic dynein 1 intermediate chain 1 OS=Mus musculus GN=Dync1i1 PE=1 SV=2	Dync1i1	2.92656e+06	4.26872e+06	2.92656e+06	2.05043e+06	883863	1.67902e+06	3.23181e+06	3.15686e+06	1.55718e+06	2.33565e+06	2.4002e+06	3.066e+06	1.29436e+06	1.40021e+06	849353	1.69007e+06	1.76245e+06	2.22195e+06	2.19069e+06	3.27946e+06	3.54391e+06	4.63109e+06	4.4106e+06	6.48906e+06
Q8CAY6	6	6	348.06	Acetyl-CoA acetyltransferase, cytosolic OS=Mus musculus GN=Acat2 PE=1 SV=2	Acat2	7.10933e+06	9.35845e+06	7.10933e+06	8.1076e+06	8.96875e+06	1.10711e+07	2.4971e+06	4.38834e+06	7.53739e+06	1.09205e+07	8.4888e+06	8.65436e+06	7.55159e+06	9.19451e+06	7.82591e+06	7.08373e+06	4.63908e+06	8.73865e+06	1.07275e+07	1.29269e+07	1.05311e+07	8.54034e+06	1.44064e+07	1.79509e+07
Q8VEK3	6	6	341.3	Heterogeneous nuclear ribonucleoprotein U OS=Mus musculus GN=Hnrnpu PE=1 SV=1	Hnrnpu	2.74974e+06	3.55946e+06	2.74974e+06	8.98362e+06	3.22869e+06	3.65567e+06	4.93444e+06	5.2162e+06	6.13759e+06	8.66979e+06	6.19817e+06	8.53347e+06	2.71568e+06	2.7322e+06	2.43581e+06	3.85622e+06	2.05522e+06	3.59608e+06	6.7611e+06	8.81901e+06	5.48432e+06	5.24386e+06	1.1332e+07	1.22327e+07
P46471	6	6	395.53	26S protease regulatory subunit 7 OS=Mus musculus GN=Psmc2 PE=1 SV=5	Psmc2	2.01706e+06	2.94959e+06	2.01706e+06	2.17315e+06	1.07613e+06	1.12313e+06	2.0071e+06	1.54051e+06	3.33506e+06	4.53714e+06	2.87581e+06	2.64167e+06	3.02273e+06	3.52714e+06	2.01045e+06	2.91876e+06	2.29508e+06	3.55974e+06	2.98371e+06	5.23464e+06	3.0068e+06	3.17013e+06	6.4235e+06	5.45884e+06
P18760	5	5	466.19	Cofilin-1 OS=Mus musculus GN=Cfl1 PE=1 SV=3	Cfl1	3.60897e+07	5.0019e+07	3.60897e+07	6.96068e+07	3.54382e+07	4.54122e+07	4.99355e+07	6.20407e+07	6.54769e+07	9.74877e+07	6.64152e+07	7.67217e+07	3.82192e+07	5.49018e+07	5.07053e+07	5.14186e+07	3.8403e+07	6.7592e+07	7.1615e+07	9.28883e+07	6.82757e+07	6.12755e+07	9.65355e+07	9.94226e+07
Q8BRT1	6	6	348.83	CLIP-associating protein 2 OS=Mus musculus GN=Clasp2 PE=1 SV=1	Clasp2	387396	442344	387396	1.28117e+06	260347	751395	1.6641e+06	1.66592e+06	1.45109e+06	1.83186e+06	1.32248e+06	2.00672e+06	1.86343e+06	2.09455e+06	1.87919e+06	1.72733e+06	1.18899e+06	1.90273e+06	2.06893e+06	2.61861e+06	3.52997e+06	3.3978e+06	3.53028e+06	3.63447e+06
Q9D892	6	6	370.34	Inosine triphosphate pyrophosphatase OS=Mus musculus GN=Itpa PE=1 SV=2	Itpa	955593	1.6066e+06	955593	92934.7	362455	316902	158488	13718.5	5263.83	0	705233	865871	1.78509e+06	2.49185e+06	1.78472e+06	2.75708e+06	816718	1.32451e+06	1.41806e+06	2.13867e+06	4.36588e+06	4.44425e+06	794313	225844
P70168	6	6	266.39	Importin subunit beta-1 OS=Mus musculus GN=Kpnb1 PE=1 SV=2	Kpnb1	579761	769816	579761	2.25157e+06	206048	2.26112e+06	1.68421e+06	2.46669e+06	5.03599e+06	5.87438e+06	3.84197e+06	3.21992e+06	2.36526e+06	2.82817e+06	3.44998e+06	1.63653e+06	1.88199e+06	2.15148e+06	3.38745e+06	3.80232e+06	5.52729e+06	4.22028e+06	3.58728e+06	771856
Q76MZ3	17	17	1260.72	Serine/threonine-protein phosphatase 2A 65 kDa regulatory subunit A alpha isoform OS=Mus musculus GN=Ppp2r1a PE=1 SV=3	Ppp2r1a	9.5319e+06	1.18905e+07	9.5319e+06	2.35806e+07	1.52463e+07	1.84912e+07	1.20276e+07	1.54727e+07	2.55725e+07	4.29582e+07	1.55381e+07	2.18392e+07	1.54453e+07	1.68809e+07	1.91146e+07	2.2084e+07	1.49077e+07	2.37568e+07	2.36033e+07	3.49619e+07	2.49245e+07	2.512e+07	4.65037e+07	4.87001e+07
P80314	14	14	871.93	T-complex protein 1 subunit beta OS=Mus musculus GN=Cct2 PE=1 SV=4	Cct2	2.04375e+06	3.06806e+06	2.04375e+06	4.12805e+06	2.42177e+06	3.47921e+06	2.10962e+06	2.67944e+06	3.18839e+06	4.86068e+06	3.95558e+06	4.44087e+06	4.12765e+06	4.19345e+06	6.45724e+06	6.74326e+06	2.27632e+06	4.22975e+06	5.61132e+06	9.35677e+06	6.73859e+06	5.4433e+06	9.75353e+06	1.41204e+07
P68404	13	13	852.44	Protein kinase C beta type OS=Mus musculus GN=Prkcb PE=1 SV=4	Prkcb	1.17233e+07	1.42986e+07	1.17233e+07	1.12133e+07	7.9402e+06	9.37777e+06	5.92693e+06	5.18647e+06	5.86696e+06	9.30548e+06	9.47052e+06	8.81321e+06	3.84412e+06	5.12827e+06	7.28315e+06	5.88654e+06	2.3639e+06	5.98606e+06	7.82489e+06	1.33384e+07	1.44063e+07	9.33797e+06	7.44529e+06	1.21726e+07
Q91V92	14	14	1021.42	ATP-citrate synthase OS=Mus musculus GN=Acly PE=1 SV=1	Acly	1.62515e+06	2.38403e+06	1.62515e+06	4.50736e+06	3.11298e+06	4.06268e+06	6.41154e+06	5.91861e+06	6.17936e+06	8.55884e+06	9.22536e+06	8.89717e+06	8.13007e+06	8.53177e+06	9.90328e+06	8.12403e+06	4.73471e+06	6.55218e+06	8.77613e+06	1.28119e+07	1.275e+07	1.03357e+07	1.5086e+07	1.02757e+07
O08709	14	14	1201.86	Peroxiredoxin-6 OS=Mus musculus GN=Prdx6 PE=1 SV=3	Prdx6	3.07411e+07	3.76039e+07	3.07411e+07	4.67418e+07	1.90095e+07	2.87779e+07	2.91481e+07	2.52108e+07	5.81541e+07	6.88002e+07	4.87122e+07	5.60111e+07	2.84448e+07	3.27248e+07	3.74512e+07	5.5819e+07	2.89149e+07	3.75522e+07	4.73731e+07	6.54247e+07	6.26067e+07	4.14056e+07	9.41985e+07	8.91889e+07
P63038	29	29	2555.21	60 kDa heat shock protein, mitochondrial OS=Mus musculus GN=Hspd1 PE=1 SV=1	Hspd1	2.91069e+07	4.02772e+07	2.91069e+07	2.79857e+07	2.49003e+07	3.05853e+07	3.36542e+07	2.90409e+07	3.08713e+07	3.91878e+07	2.88071e+07	4.50335e+07	2.27186e+07	3.05663e+07	2.14352e+07	2.40215e+07	1.68118e+07	3.30738e+07	2.53691e+07	4.46815e+07	4.27805e+07	3.87574e+07	5.56734e+07	4.83983e+07
P63017	33	33	2876.42	Heat shock cognate 71 kDa protein OS=Mus musculus GN=Hspa8 PE=1 SV=1	Hspa8	7.55937e+07	1.18233e+08	7.55937e+07	1.32122e+08	7.31663e+07	8.71379e+07	1.32186e+08	1.06845e+08	1.10286e+08	1.93325e+08	1.17254e+08	1.52745e+08	8.15442e+07	8.79856e+07	9.91262e+07	1.37549e+08	6.55084e+07	1.13775e+08	1.11666e+08	1.50473e+08	1.09047e+08	1.18354e+08	2.24404e+08	2.33364e+08
Q02053	38	38	2707.9	Ubiquitin-like modifier-activating enzyme 1 OS=Mus musculus GN=Uba1 PE=1 SV=1	Uba1	2.53724e+07	3.06333e+07	2.53724e+07	2.68184e+07	1.50296e+07	2.50854e+07	2.16783e+07	2.60493e+07	3.43917e+07	4.75166e+07	3.34191e+07	3.72699e+07	1.71415e+07	2.1008e+07	2.414e+07	2.3322e+07	1.6693e+07	2.32114e+07	2.73721e+07	3.82957e+07	4.18015e+07	3.12599e+07	5.54839e+07	8.0254e+07
P17751	20	20	1938.78	Triosephosphate isomerase OS=Mus musculus GN=Tpi1 PE=1 SV=4	Tpi1	8.00103e+07	1.11176e+08	8.00103e+07	9.69965e+07	6.65106e+07	8.64785e+07	6.64698e+07	7.79001e+07	1.28149e+08	1.66269e+08	1.07387e+08	1.3668e+08	8.26354e+07	1.32745e+08	8.42457e+07	4.15158e+07	6.68486e+07	1.02362e+08	1.06485e+08	1.3759e+08	1.96443e+08	1.55952e+08	1.94903e+08	2.10963e+08
P19096	21	21	1296.79	Fatty acid synthase OS=Mus musculus GN=Fasn PE=1 SV=2	Fasn	3.80947e+06	4.78237e+06	3.80947e+06	4.86951e+06	3.13332e+06	4.31281e+06	4.81385e+06	4.12071e+06	4.82089e+06	7.94802e+06	5.40203e+06	7.10378e+06	5.3109e+06	7.39714e+06	6.45966e+06	5.33981e+06	3.7936e+06	5.63171e+06	6.01955e+06	9.02296e+06	1.03712e+07	8.43938e+06	1.0434e+07	9.10863e+06
P06745	19	19	1198.07	Glucose-6-phosphate isomerase OS=Mus musculus GN=Gpi PE=1 SV=4	Gpi	3.48677e+07	5.76255e+07	3.48677e+07	9.18174e+07	4.59213e+07	5.94605e+07	5.56269e+07	6.59997e+07	7.61947e+07	1.18445e+08	6.93365e+07	8.70008e+07	3.87667e+07	7.11482e+07	6.69098e+07	8.25279e+07	3.65697e+07	6.42554e+07	6.64049e+07	7.59624e+07	6.63746e+07	7.38572e+07	1.06306e+08	1.24503e+08
P60710	26	25	2366.76	Actin, cytoplasmic 1 OS=Mus musculus GN=Actb PE=1 SV=1	Actb	6.294e+07	1.00677e+08	6.294e+07	2.53626e+08	6.41994e+07	2.09007e+08	1.26613e+08	1.25407e+08	7.43885e+07	1.14281e+08	1.70943e+08	2.11653e+08	1.38301e+08	1.77226e+08	7.65326e+07	1.72302e+08	9.92057e+07	1.3672e+08	2.12285e+08	2.97183e+08	1.3934e+08	9.01552e+07	2.95474e+08	3.15825e+08
P09405	10	10	817.2	Nucleolin OS=Mus musculus GN=Ncl PE=1 SV=2	Ncl	2.3274e+06	3.73673e+06	2.3274e+06	6.04784e+06	3.48635e+06	4.79161e+06	2.89313e+06	4.02371e+06	2.91927e+06	4.17595e+06	3.47977e+06	5.22522e+06	4.69303e+06	6.53603e+06	3.2599e+06	5.8611e+06	2.13531e+06	3.60822e+06	2.60374e+06	4.30864e+06	5.68653e+06	6.06025e+06	8.2623e+06	1.05204e+07
Q8C8R3	10	10	529.13	Ankyrin-2 OS=Mus musculus GN=Ank2 PE=1 SV=2	Ank2	1.42249e+06	1.822e+06	1.42249e+06	2.3389e+06	2.22037e+06	2.9409e+06	2.8702e+06	3.23231e+06	2.33323e+06	3.8019e+06	1.11463e+06	1.40957e+06	1.8085e+06	1.59108e+06	2.62603e+06	3.13697e+06	872503	1.83096e+06	2.18854e+06	2.55457e+06	2.52873e+06	2.60684e+06	4.12904e+06	4.46883e+06
Q6ZQ38	9	9	511.88	Cullin-associated NEDD8-dissociated protein 1 OS=Mus musculus GN=Cand1 PE=1 SV=2	Cand1	4.1169e+06	4.95384e+06	4.1169e+06	5.35783e+06	4.43386e+06	5.09837e+06	9.33486e+06	1.13004e+07	1.02718e+07	1.63033e+07	5.95586e+06	8.22632e+06	7.57687e+06	9.54553e+06	6.62694e+06	1.01233e+07	3.86271e+06	7.06597e+06	5.80091e+06	7.70896e+06	1.25359e+07	9.75236e+06	1.28768e+07	1.48109e+07
P11983	9	9	437.34	T-complex protein 1 subunit alpha OS=Mus musculus GN=Tcp1 PE=1 SV=3	Tcp1	4.27065e+06	4.94287e+06	4.27065e+06	7.76128e+06	3.69071e+06	4.32495e+06	4.18346e+06	5.19176e+06	6.44897e+06	7.42791e+06	6.16189e+06	6.9368e+06	4.46718e+06	8.83673e+06	4.56598e+06	5.1812e+06	3.82666e+06	5.41271e+06	8.96417e+06	1.09891e+07	1.32197e+07	1.02307e+07	1.40238e+07	1.61912e+07
Q9R1P4	9	9	571.55	Proteasome subunit alpha type-1 OS=Mus musculus GN=Psma1 PE=1 SV=1	Psma1	2.05559e+06	3.16305e+06	2.05559e+06	1.6242e+06	1.04124e+06	1.30292e+06	1.96878e+06	1.49871e+06	1.35871e+06	2.42413e+06	2.58293e+06	2.9643e+06	1.46928e+06	1.12598e+06	1.64281e+06	3.2743e+06	1.00911e+06	1.64616e+06	1.72336e+06	3.23456e+06	1.93526e+06	2.54287e+06	3.65606e+06	4.8231e+06
Q8BGQ7	12	12	935.58	Alanine--tRNA ligase, cytoplasmic OS=Mus musculus GN=Aars PE=1 SV=1	Aars	3.00621e+06	4.08784e+06	3.00621e+06	5.97161e+06	4.32476e+06	5.11383e+06	4.28125e+06	3.23347e+06	4.17836e+06	6.0638e+06	4.88015e+06	7.04562e+06	5.90159e+06	6.17175e+06	4.28842e+06	6.43013e+06	1.60839e+06	5.03205e+06	8.77586e+06	1.08888e+07	7.07692e+06	6.94961e+06	1.11834e+07	7.47095e+06
Q61206	10	10	859	Platelet-activating factor acetylhydrolase IB subunit beta OS=Mus musculus GN=Pafah1b2 PE=1 SV=2	Pafah1b2	4.12942e+06	5.55186e+06	4.12942e+06	1.56668e+07	1.7949e+07	2.81776e+07	1.54751e+07	7.68733e+06	1.61748e+07	2.04945e+07	1.42977e+07	1.8472e+07	3.61689e+07	4.37468e+07	1.98789e+07	1.19404e+07	1.37248e+07	2.333e+07	4.18997e+07	5.75549e+07	3.98829e+07	3.45114e+07	4.58244e+07	4.65698e+07
P61202	3	3	104.55	COP9 signalosome complex subunit 2 OS=Mus musculus GN=Cops2 PE=1 SV=1	Cops2	768432	1.06868e+06	768432	1.56163e+06	997691	1.20075e+06	684085	332631	686057	910848	919906	843778	2.11834e+06	2.06034e+06	2.3772e+06	1.1117e+06	1.09607e+06	2.43101e+06	1.80731e+06	2.21227e+06	2.48729e+06	1.40423e+06	1.48163e+06	2.31009e+06
Q9JLV5	3	3	205.88	Cullin-3 OS=Mus musculus GN=Cul3 PE=1 SV=1	Cul3	371102	446283	371102	813248	293155	638553	503972	496353	295596	532980	555064	767636	450843	403094	387311	495913	583674	765983	845032	1.16376e+06	810756	807039	1.33597e+06	1.33424e+06
P97494	3	3	103.59	Glutamate--cysteine ligase catalytic subunit OS=Mus musculus GN=Gclc PE=1 SV=4	Gclc	1.05251e+06	1.33465e+06	1.05251e+06	1.82584e+06	1.03929e+06	1.13659e+06	405125	486995	597939	967941	674459	775207	1.02295e+06	1.09272e+06	1.26447e+06	1.85177e+06	1.08543e+06	2.01417e+06	918518	1.41995e+06	632912	921374	1.93692e+06	2.02776e+06
P61079	3	3	192.92	Ubiquitin-conjugating enzyme E2 D3 OS=Mus musculus GN=Ube2d3 PE=1 SV=1	Ube2d3	977591	1.2087e+06	977591	4.57187e+06	1.55522e+06	3.52615e+06	4.63624e+06	4.44814e+06	4.17923e+06	6.418e+06	4.61934e+06	5.87355e+06	3.17039e+06	4.3002e+06	3.82481e+06	6.92058e+06	2.27285e+06	3.83037e+06	9.37256e+06	1.00964e+07	9.8385e+06	9.46718e+06	9.60528e+06	1.02337e+07
Q9Z2U0	3	3	180.92	Proteasome subunit alpha type-7 OS=Mus musculus GN=Psma7 PE=1 SV=1	Psma7	797767	1.11373e+06	797767	1.8452e+06	853404	1.40019e+06	1.88126e+06	1.39042e+06	3.2306e+06	4.84593e+06	3.33935e+06	4.09241e+06	1.36155e+06	1.577e+06	2.80705e+06	2.65378e+06	527215	1.3846e+06	1.92644e+06	2.62082e+06	1.12979e+06	1.1663e+06	4.3664e+06	5.46561e+06
Q8VBV7	3	3	261.45	COP9 signalosome complex subunit 8 OS=Mus musculus GN=Cops8 PE=1 SV=1	Cops8	326021	751984	326021	741625	632319	458001	3.09408e+06	3.0096e+06	5.20728e+06	7.27457e+06	3.81765e+06	4.43149e+06	2.28016e+06	3.36593e+06	2.62792e+06	2.96687e+06	1.99587e+06	2.87979e+06	0	0	0	0	0	0
P63037	3	3	168.92	DnaJ homolog subfamily A member 1 OS=Mus musculus GN=Dnaja1 PE=1 SV=1	Dnaja1	597109	665320	597109	1.0183e+06	588931	658400	1.51461e+06	2.13526e+06	529668	988063	218835	276048	1.87168e+06	1.78823e+06	1.42733e+06	1.99736e+06	1.29902e+06	2.38396e+06	1.36879e+06	1.50934e+06	2.48245e+06	2.51504e+06	2.26717e+06	2.91447e+06
Q91V09	3	3	218.2	WD repeat-containing protein 13 OS=Mus musculus GN=Wdr13 PE=1 SV=1	Wdr13	664592	970679	664592	352727	261873	213215	832846	928360	368839	489056	715115	752807	327496	331309	357909	517883	319717	639124	418290	747714	380435	495581	1.07242e+06	1.22507e+06
Q9QVP9	3	3	152.68	Protein-tyrosine kinase 2-beta OS=Mus musculus GN=Ptk2b PE=1 SV=2	Ptk2b	751108	920577	751108	636852	866330	765201	1.13202e+06	698372	821253	1.04449e+06	1.03155e+06	936603	613650	634410	605612	512344	455350	660887	1.7111e+06	1.89663e+06	2.25909e+06	2.01791e+06	1.7986e+06	2.5194e+06
Q8VDM4	3	3	301.38	26S proteasome non-ATPase regulatory subunit 2 OS=Mus musculus GN=Psmd2 PE=1 SV=1	Psmd2	1.26879e+06	2.05372e+06	1.26879e+06	1.36088e+06	209173	748784	1.37623e+06	1.11575e+06	2.5191e+06	3.84995e+06	2.56718e+06	2.08358e+06	1.62871e+06	2.06395e+06	1.90103e+06	2.69063e+06	988344	1.42903e+06	2.47326e+06	3.32748e+06	3.70984e+06	3.36207e+06	3.72976e+06	2.80055e+06
O35381	3	3	205.98	Acidic leucine-rich nuclear phosphoprotein 32 family member A OS=Mus musculus GN=Anp32a PE=1 SV=1	Anp32a	7.59783e+06	9.81943e+06	7.59783e+06	2.01346e+07	9.28556e+06	1.29977e+07	1.02407e+07	1.17819e+07	9.01771e+06	1.35429e+07	1.42477e+07	1.66053e+07	1.2124e+07	1.73907e+07	1.44363e+07	1.30615e+07	5.14248e+06	1.21313e+07	1.53023e+07	2.33204e+07	3.3238e+07	2.92693e+07	2.03443e+07	3.52812e+07
P63158	3	3	282.34	High mobility group protein B1 OS=Mus musculus GN=Hmgb1 PE=1 SV=2	Hmgb1	1.92855e+06	2.57685e+06	1.92855e+06	8.21487e+06	2.39934e+06	2.51712e+06	4.29609e+06	4.06988e+06	1.58956e+06	2.95686e+06	6.25876e+06	4.35234e+06	3.17686e+06	2.7862e+06	1.5755e+06	2.61722e+06	1.17507e+06	2.55365e+06	4.21179e+06	5.04317e+06	8.51037e+06	7.43028e+06	6.39972e+06	6.76244e+06
P62259	3	3	249.15	14-3-3 protein epsilon OS=Mus musculus GN=Ywhae PE=1 SV=1	Ywhae	2.23275e+06	3.78517e+06	2.23275e+06	1.56688e+07	7.74251e+06	9.40891e+06	2.82059e+06	1.69205e+07	2.77224e+07	3.37752e+07	2.51626e+07	2.11431e+07	9.15552e+06	1.08855e+07	3.76956e+07	4.59578e+07	9.09666e+06	1.07942e+07	1.09381e+07	1.14139e+07	1.10328e+07	1.06191e+07	5.02595e+07	5.57331e+07
Q8BKZ9	3	3	259.36	Pyruvate dehydrogenase protein X component, mitochondrial OS=Mus musculus GN=Pdhx PE=1 SV=1	Pdhx	1.58685e+06	1.91764e+06	1.58685e+06	1.90367e+06	1.72674e+06	1.26395e+06	2.44956e+06	2.2254e+06	1.33499e+06	2.6652e+06	1.72902e+06	1.8663e+06	1.20983e+06	1.39125e+06	1.0297e+06	1.75136e+06	894141	1.7231e+06	2.40853e+06	3.20105e+06	2.41442e+06	2.29152e+06	3.46318e+06	3.92602e+06
P61082	3	3	168.99	NEDD8-conjugating enzyme Ubc12 OS=Mus musculus GN=Ube2m PE=1 SV=1	Ube2m	697178	958887	697178	1.9216e+06	763616	874693	438210	425092	336674	511793	1.95509e+06	1.68187e+06	338477	298931	322645	406221	297399	614996	1.20294e+06	1.60958e+06	1.55256e+06	1.44174e+06	1.07431e+06	1.28933e+06
P51859	3	3	214.93	Hepatoma-derived growth factor OS=Mus musculus GN=Hdgf PE=1 SV=2	Hdgf	1.11741e+06	1.59834e+06	1.11741e+06	5.28085e+06	889638	1.42091e+06	1.52569e+06	1.48052e+06	2.88848e+06	4.98276e+06	2.52005e+06	3.17281e+06	3.86236e+06	3.38467e+06	3.95317e+06	5.25952e+06	3.42177e+06	6.33636e+06	4.4288e+06	6.26229e+06	3.53663e+06	3.81278e+06	6.33231e+06	6.12888e+06
P56812	3	3	265.18	Programmed cell death protein 5 OS=Mus musculus GN=Pdcd5 PE=1 SV=3	Pdcd5	522517	686983	522517	1.44203e+06	1.33555e+06	1.32796e+06	1.84466e+06	1.56963e+06	1.06025e+06	1.49038e+06	244872	1.05675e+06	786942	1.27584e+06	792597	652820	637557	901227	2.11363e+06	3.52212e+06	2.31013e+06	2.17498e+06	4.46998e+06	5.36659e+06
Q9QUI0	3	3	258.27	Transforming protein RhoA OS=Mus musculus GN=Rhoa PE=1 SV=1	Rhoa	1.50796e+06	1.97783e+06	1.50796e+06	4.89591e+06	2.05815e+06	2.36583e+06	5.44474e+06	5.8642e+06	3.7111e+06	6.95309e+06	5.15642e+06	6.22303e+06	2.94775e+06	2.27318e+06	2.73414e+06	6.41009e+06	1.85457e+06	4.78564e+06	2.87894e+06	4.72115e+06	3.90066e+06	4.53664e+06	7.5787e+06	7.06263e+06
Q9R1T2	3	3	119.71	SUMO-activating enzyme subunit 1 OS=Mus musculus GN=Sae1 PE=1 SV=1	Sae1	110951	147991	110951	242928	21730.6	38372.4	310493	46092.5	329654	640642	487092	409660	256156	651775	123514	415165	72537.9	132199	277404	489220	1.26043e+06	1.07611e+06	291019	3038.13
Q99J09	3	3	124.37	Methylosome protein 50 OS=Mus musculus GN=Wdr77 PE=1 SV=1	Wdr77	102391	176148	102391	715421	268451	109023	1.87209e+06	230453	2.7592e+06	3.93868e+06	3.34986e+06	3.57939e+06	895170	1.07393e+06	703815	95784.9	840633	990531	1.24675e+06	1.14181e+06	3.56107e+06	1.98616e+06	622927	342871
Q8K310	3	3	86.24	Matrin-3 OS=Mus musculus GN=Matr3 PE=1 SV=1	Matr3	82311.7	84767.7	82311.7	847506	100144	91851.2	1.06487e+06	1.26283e+06	1.62024e+06	2.62282e+06	757737	870264	884806	894550	1.17521e+06	2.37737e+06	909348	1.4453e+06	1.01163e+06	1.24348e+06	749262	1.27619e+06	1.47317e+06	1.39017e+06
P62192	3	3	121.07	26S protease regulatory subunit 4 OS=Mus musculus GN=Psmc1 PE=1 SV=1	Psmc1	218056	242077	218056	306808	358495	340099	155597	8509.6	287281	400815	256798	335179	885666	513168	781181	577917	613812	1.07003e+06	1.02609e+06	1.43198e+06	935983	697176	1.75956e+06	1.90324e+06
P62751	2	2	95.04	60S ribosomal protein L23a OS=Mus musculus GN=Rpl23a PE=1 SV=1	Rpl23a	3.24572e+06	4.27899e+06	3.24572e+06	368821	1.32355e+06	2.48924e+06	375385	490770	2079.98	5037.88	9683.34	50067.6	0	0	0	0	0	0	0	0	0	0	0	0
Q80UW2	2	2	91.62	F-box only protein 2 OS=Mus musculus GN=Fbxo2 PE=1 SV=1	Fbxo2	2.56642e+06	3.15637e+06	2.56642e+06	2.6145e+06	2.72834e+06	3.69454e+06	3.0837e+06	2.00909e+06	2.90347e+06	3.86919e+06	4.02747e+06	5.96145e+06	3.5028e+06	3.86788e+06	3.33124e+06	2.9443e+06	2.17184e+06	2.31631e+06	3.20128e+06	5.4364e+06	4.5749e+06	3.80689e+06	8.58472e+06	8.68705e+06
P49615	3	3	113.12	Cyclin-dependent-like kinase 5 OS=Mus musculus GN=Cdk5 PE=1 SV=1	Cdk5	403683	457240	403683	996274	481110	213540	1.19961e+06	1.63891e+06	2.62076e+06	3.02737e+06	4.22593e+06	3.84529e+06	2.1178e+06	2.65401e+06	2.01496e+06	4.06893e+06	2.35255e+06	2.93186e+06	3.18724e+06	4.80503e+06	5.55337e+06	4.55372e+06	5.40698e+06	7.2629e+06
P62983	3	3	107.76	Ubiquitin-40S ribosomal protein S27a OS=Mus musculus GN=Rps27a PE=1 SV=2	Rps27a	519860	704691	519860	729728	349496	427838	510876	634487	344650	460133	494703	585505	435935	316034	189661	275084	430324	756890	183134	55949.7	20727.3	31428.8	149946	148353
Q9ES28	3	3	114.13	Rho guanine nucleotide exchange factor 7 OS=Mus musculus GN=Arhgef7 PE=1 SV=2	Arhgef7	304942	435670	304942	395005	98009	327588	52967.8	30636.2	34851.2	47851.4	0	11859.5	321261	218655	213940	395530	336531	511329	97161.6	101677	183356	89971.9	92613.9	159216
Q8VDQ8	3	3	182.71	NAD-dependent protein deacetylase sirtuin-2 OS=Mus musculus GN=Sirt2 PE=1 SV=2	Sirt2	235523	492098	235523	1.12914e+06	681515	701346	653054	578344	898521	1.73294e+06	1.36447e+06	1.25527e+06	743538	1.09468e+06	995649	1.82369e+06	709323	1.06179e+06	1.47552e+06	2.64145e+06	1.3094e+06	1.29963e+06	2.17532e+06	2.24878e+06
Q60676	4	4	272.77	Serine/threonine-protein phosphatase 5 OS=Mus musculus GN=Ppp5c PE=1 SV=3	Ppp5c	2.1971e+06	2.6819e+06	2.1971e+06	2.61748e+06	1.37409e+06	1.48435e+06	966258	847984	1.2151e+06	1.87822e+06	1.78204e+06	1.74406e+06	937700	1.02319e+06	990739	1.45219e+06	682869	1.33568e+06	1.92663e+06	2.17674e+06	1.7418e+06	1.59598e+06	2.49775e+06	3.33259e+06
P63087	4	4	244.26	Serine/threonine-protein phosphatase PP1-gamma catalytic subunit OS=Mus musculus GN=Ppp1cc PE=1 SV=1	Ppp1cc	773683	1.16279e+06	773683	2.10091e+06	793886	1.00678e+06	0	0	0	0	0	0	0	0	0	0	0	0	0	0	0	0	0	0
P31324	4	4	224.49	cAMP-dependent protein kinase type II-beta regulatory subunit OS=Mus musculus GN=Prkar2b PE=1 SV=3	Prkar2b	928013	1.23549e+06	928013	2.69891e+06	2.36506e+06	3.67432e+06	4.65851e+06	2.30391e+06	2.79592e+06	4.78228e+06	3.53391e+06	4.04905e+06	2.98108e+06	3.71639e+06	4.06336e+06	4.37438e+06	1.9581e+06	3.55335e+06	4.29706e+06	5.77019e+06	6.27022e+06	5.98134e+06	8.60696e+06	9.74689e+06
Q8BMF4	4	4	265.94	Dihydrolipoyllysine-residue acetyltransferase component of pyruvate dehydrogenase complex, mitochondrial OS=Mus musculus GN=Dlat PE=1 SV=2	Dlat	1.3196e+06	1.66859e+06	1.3196e+06	1.94525e+06	665246	1.76119e+06	2.20028e+06	1.53483e+06	4.44102e+06	6.2807e+06	3.62722e+06	3.8356e+06	2.86039e+06	4.01043e+06	2.99762e+06	2.64727e+06	2.22369e+06	3.30374e+06	2.4023e+06	3.14439e+06	3.73288e+06	2.61922e+06	5.07303e+06	5.61211e+06
Q61937	4	4	258.71	Nucleophosmin OS=Mus musculus GN=Npm1 PE=1 SV=1	Npm1	2.55873e+06	3.67169e+06	2.55873e+06	1.13996e+06	2.66458e+06	4.48259e+06	428530	3.49726e+06	2.94025e+06	4.05186e+06	1.167e+06	1.10292e+06	3.41536e+06	6.39638e+06	3.5983e+06	4.87346e+06	2.8902e+06	4.193e+06	1.30784e+06	1.53054e+06	2.54221e+06	1.76766e+06	3.29069e+06	4.04392e+06
O88545	4	4	133.18	COP9 signalosome complex subunit 6 OS=Mus musculus GN=Cops6 PE=1 SV=1	Cops6	1.31775e+06	1.92696e+06	1.31775e+06	2.95674e+06	2.09237e+06	2.51707e+06	185591	174896	303806	455331	286000	379253	2.40805e+06	1.69372e+06	2.63123e+06	4.0708e+06	1.48814e+06	2.37018e+06	3.27066e+06	4.16574e+06	2.71584e+06	2.9782e+06	4.92232e+06	5.00429e+06
Q9QUM9	5	5	324.48	Proteasome subunit alpha type-6 OS=Mus musculus GN=Psma6 PE=1 SV=1	Psma6	624224	960847	624224	2.0183e+06	749526	826160	3.48455e+06	3.47675e+06	1.23327e+06	2.24417e+06	2.34895e+06	3.48606e+06	867814	530834	864106	1.69213e+06	794118	1.18951e+06	871316	1.63515e+06	686664	884725	1.90979e+06	2.92527e+06
P62334	5	5	255.2	26S protease regulatory subunit 10B OS=Mus musculus GN=Psmc6 PE=1 SV=1	Psmc6	814781	1.13059e+06	814781	1.79483e+06	1.07339e+06	1.14438e+06	1.57895e+06	1.62838e+06	1.29747e+06	2.15994e+06	1.67385e+06	1.82017e+06	865034	892975	752538	1.63453e+06	795423	1.33862e+06	1.22395e+06	2.46229e+06	1.38702e+06	1.76358e+06	2.46326e+06	2.55625e+06
Q8VDP4	5	5	180.83	Cell cycle and apoptosis regulator protein 2 OS=Mus musculus GN=Ccar2 PE=1 SV=2	Ccar2	581689	741599	581689	1.35289e+06	481242	869336	539416	472753	659139	982985	226952	756513	1.02496e+06	1.36997e+06	795765	2.02e+06	768121	984835	1.15966e+06	2.2474e+06	1.79144e+06	2.06018e+06	1.74874e+06	2.48969e+06
P54775	5	5	291.79	26S protease regulatory subunit 6B OS=Mus musculus GN=Psmc4 PE=1 SV=2	Psmc4	466109	660636	466109	1.81725e+06	757663	872843	3.80037e+06	4.25672e+06	3.81873e+06	4.62037e+06	2.86329e+06	1.31282e+06	1.93671e+06	2.51797e+06	4.02656e+06	4.33703e+06	1.33607e+06	1.9098e+06	5.41569e+06	4.22355e+06	6.90889e+06	6.44832e+06	6.61927e+06	3.21037e+06
Q9ESN6	5	5	439.01	Tripartite motif-containing protein 2 OS=Mus musculus GN=Trim2 PE=1 SV=1	Trim2	1.8576e+06	2.45922e+06	1.8576e+06	3.73807e+06	1.79869e+06	2.14387e+06	3.20216e+06	1.51153e+06	1.37174e+06	2.31041e+06	3.10788e+06	2.37613e+06	2.14545e+06	1.99629e+06	1.82441e+06	3.19767e+06	1.62255e+06	2.73117e+06	1.95064e+06	2.95188e+06	2.93266e+06	2.80051e+06	2.61419e+06	3.9887e+06
O88712	5	5	234.5	C-terminal-binding protein 1 OS=Mus musculus GN=Ctbp1 PE=1 SV=2	Ctbp1	389047	470445	389047	1.8768e+06	1.55478e+06	2.0838e+06	3.16061e+06	1.83241e+06	1.03453e+06	1.60501e+06	1.89329e+06	2.41721e+06	930516	2.29309e+06	2.04712e+06	2.16098e+06	1.30101e+06	687377	942366	1.35685e+06	1.77102e+06	2.03162e+06	937870	728886
Q9CQV8	4	4	212.5	14-3-3 protein beta/alpha OS=Mus musculus GN=Ywhab PE=1 SV=3	Ywhab	9.27429e+06	1.53054e+07	9.27429e+06	2.9487e+07	2.2282e+07	2.20069e+07	4.10829e+07	3.67958e+07	4.47636e+07	6.15479e+07	4.41805e+07	2.42035e+07	2.45011e+07	3.27915e+07	3.55916e+07	4.30568e+07	1.9466e+07	3.32749e+07	3.94739e+07	4.28508e+07	4.87599e+07	4.71849e+07	5.25315e+07	4.49098e+07
P61089	4	4	263.98	Ubiquitin-conjugating enzyme E2 N OS=Mus musculus GN=Ube2n PE=1 SV=1	Ube2n	2.63144e+06	3.12405e+06	2.63144e+06	1.24156e+07	2.50556e+06	3.14892e+06	1.10528e+07	1.2085e+07	8.65716e+06	1.25903e+07	1.182e+07	2.02463e+07	5.3431e+06	7.02376e+06	6.1741e+06	1.28244e+07	4.98254e+06	8.89884e+06	8.08249e+06	1.49199e+07	1.38206e+07	1.23744e+07	1.07936e+07	1.18462e+07
P17879	5	5	261.6	Heat shock 70 kDa protein 1B OS=Mus musculus GN=Hspa1b PE=1 SV=3	Hspa1b	708613	1.14459e+06	708613	1.31284e+06	541465	899663	818410	1.12398e+06	1.05567e+06	1.70919e+06	2.11002e+06	2.40594e+06	742879	483724	605847	728478	411316	792477	671632	1.09169e+06	570788	564743	1.1182e+06	989802
Q8CIN4	5	5	230.11	Serine/threonine-protein kinase PAK 2 OS=Mus musculus GN=Pak2 PE=1 SV=1	Pak2	978144	1.24974e+06	978144	1.36378e+06	962749	1.18512e+06	2.56219e+06	3.31824e+06	1.32491e+06	1.88687e+06	1.0106e+06	1.37267e+06	1.26448e+06	1.32335e+06	1.80737e+06	2.56986e+06	826118	1.3858e+06	1.86682e+06	2.42162e+06	2.90418e+06	2.50201e+06	4.0084e+06	4.76443e+06
Q91VR5	5	5	296.07	ATP-dependent RNA helicase DDX1 OS=Mus musculus GN=Ddx1 PE=1 SV=1	Ddx1	203749	313078	203749	924913	283878	241620	2.60993e+06	2.42265e+06	1.96812e+06	3.41733e+06	1.97906e+06	2.18133e+06	2.04537e+06	3.24445e+06	1.9759e+06	3.9687e+06	1.21601e+06	2.35232e+06	2.49233e+06	3.02309e+06	2.90672e+06	3.20108e+06	2.31343e+06	1.69602e+06
Q3UM45	5	5	359.89	Protein phosphatase 1 regulatory subunit 7 OS=Mus musculus GN=Ppp1r7 PE=1 SV=2	Ppp1r7	787814	1.0253e+06	787814	1.50757e+06	1.36659e+06	3.53309e+06	1.57049e+06	1.86978e+06	2.02183e+06	2.94096e+06	1.83907e+06	2.20609e+06	1.61255e+06	2.27825e+06	2.56385e+06	4.41094e+06	1.53463e+06	2.40082e+06	2.23641e+06	3.80094e+06	3.34084e+06	2.97679e+06	5.52787e+06	7.63317e+06
P49722	4	4	220.26	Proteasome subunit alpha type-2 OS=Mus musculus GN=Psma2 PE=1 SV=3	Psma2	751566	1.01158e+06	751566	1.46464e+06	1.06701e+06	1.13351e+06	807988	1.06014e+06	4.34758e+06	4.70319e+06	469158	673523	2.65687e+06	3.38964e+06	5.23783e+06	2.82501e+06	1.6895e+06	3.43118e+06	2.0114e+06	2.01883e+06	1.44456e+06	1.41181e+06	4.90653e+06	3.7194e+06
Q9CR00	4	4	195.71	26S proteasome non-ATPase regulatory subunit 9 OS=Mus musculus GN=Psmd9 PE=1 SV=1	Psmd9	629876	917699	629876	529951	364957	552208	0	0	0	0	0	0	250963	597613	288758	331694	224212	399593	544695	564217	261524	429704	465771	1.02577e+06
Q60737	4	4	193.99	Casein kinase II subunit alpha OS=Mus musculus GN=Csnk2a1 PE=1 SV=2	Csnk2a1	911935	986761	911935	1.9763e+06	782579	639326	731544	1.21257e+06	2.07383e+06	3.01674e+06	1.94313e+06	2.24074e+06	3.32642e+06	3.58088e+06	2.69201e+06	3.27109e+06	1.17183e+06	1.86523e+06	2.07213e+06	3.3718e+06	3.01097e+06	3.05569e+06	5.06945e+06	5.22515e+06
Q7TMY8	4	4	183.64	E3 ubiquitin-protein ligase HUWE1 OS=Mus musculus GN=Huwe1 PE=1 SV=5	Huwe1	549005	709242	549005	908446	438262	504955	3.19472e+06	5.16157e+06	912747	1.30981e+06	2.67629e+06	3.55305e+06	1.51655e+06	1.91137e+06	1.80788e+06	3.50069e+06	1.54877e+06	2.50521e+06	730845	1.20948e+06	1.04689e+06	1.17924e+06	958828	681963
P62196	4	4	219.53	26S protease regulatory subunit 8 OS=Mus musculus GN=Psmc5 PE=1 SV=1	Psmc5	1.00445e+06	1.64025e+06	1.00445e+06	651413	681519	567961	1.53273e+06	1.23139e+06	3.38888e+06	4.45418e+06	1.88825e+06	1.94857e+06	2.41892e+06	3.2865e+06	1.83181e+06	2.67787e+06	2.13194e+06	3.12257e+06	4.29742e+06	7.89392e+06	6.83857e+06	4.58268e+06	9.0807e+06	9.34423e+06
P12367	4	4	209.39	cAMP-dependent protein kinase type II-alpha regulatory subunit OS=Mus musculus GN=Prkar2a PE=1 SV=2	Prkar2a	735557	1.04502e+06	735557	956874	627834	907296	545869	598492	448256	494438	764161	493847	347237	602114	196856	144444	289727	494572	554602	963924	689279	748933	369778	209254
Q9R1R2	4	4	269.39	Tripartite motif-containing protein 3 OS=Mus musculus GN=Trim3 PE=1 SV=1	Trim3	191066	250418	191066	390490	126292	414870	254504	543074	616280	886326	398007	624227	1.10551e+06	1.08364e+06	1.05561e+06	1.72911e+06	920047	1.93904e+06	697979	1.14706e+06	1.07214e+06	1.1811e+06	760873	798254
Q3U1J4	4	4	151.53	DNA damage-binding protein 1 OS=Mus musculus GN=Ddb1 PE=1 SV=2	Ddb1	63186.7	135859	63186.7	629924	38412.2	40191.7	547180	578197	866759	1.41078e+06	730676	1.00387e+06	841942	917011	711212	856916	436750	864695	954060	1.34261e+06	1.3891e+06	1.4474e+06	1.34448e+06	1.10107e+06
Q62318	4	4	151.75	Transcription intermediary factor 1-beta OS=Mus musculus GN=Trim28 PE=1 SV=3	Trim28	669011	822019	669011	1.86274e+06	334990	1.23798e+06	1.47163e+06	699142	1.99278e+06	3.38709e+06	1.33661e+06	1.70309e+06	1.24698e+06	1.92548e+06	1.87998e+06	1.89952e+06	1.40814e+06	1.7525e+06	1.76741e+06	2.46808e+06	1.51263e+06	1.20108e+06	2.6354e+06	2.9702e+06
Q8VIJ6	4	4	217.79	Splicing factor, proline- and glutamine-rich OS=Mus musculus GN=Sfpq PE=1 SV=1	Sfpq	319399	292122	319399	366401	8830.98	7611.5	13169	291809	355875	448553	109998	282582	0	0	0	0	0	0	0	0	0	0	0	0
Q9JMA1	4	4	252.56	Ubiquitin carboxyl-terminal hydrolase 14 OS=Mus musculus GN=Usp14 PE=1 SV=3	Usp14	770735	1.17139e+06	770735	1.25639e+06	631352	538211	153127	284992	92716.5	196114	462737	491438	797130	1.81362e+06	1.23444e+06	1.71682e+06	848171	1.73206e+06	917366	1.35375e+06	872260	960490	1.82126e+06	1.63856e+06
Q8CGY8	4	4	188.59	UDP-N-acetylglucosamine--peptide N-acetylglucosaminyltransferase 110 kDa subunit OS=Mus musculus GN=Ogt PE=1 SV=2	Ogt	815865	1.23109e+06	815865	1.23383e+06	1.28785e+06	1.46918e+06	1.30644e+06	1.59542e+06	1.81027e+06	2.38092e+06	896160	1.16524e+06	948811	1.3534e+06	1.19524e+06	1.37204e+06	912661	1.69104e+06	1.34676e+06	1.84355e+06	1.42849e+06	1.76891e+06	1.94804e+06	2.3253e+06
Q78ZA7	4	4	205.92	Nucleosome assembly protein 1-like 4 OS=Mus musculus GN=Nap1l4 PE=1 SV=1	Nap1l4	441875	738351	441875	1.16664e+06	733503	954652	1.09922e+06	1.39489e+06	1.74736e+06	2.41858e+06	1.44425e+06	2.28295e+06	1.00111e+06	1.74913e+06	862898	824092	867188	1.45343e+06	1.60208e+06	2.76348e+06	2.19911e+06	2.04759e+06	1.87796e+06	601990
P23198	4	4	269.04	Chromobox protein homolog 3 OS=Mus musculus GN=Cbx3 PE=1 SV=2	Cbx3	708260	1.18833e+06	708260	1.50677e+06	597851	638858	777384	1.28727e+06	89497.6	135502	1.2718e+06	1.16747e+06	381140	273217	205969	528769	407904	611883	595304	954465	840067	1.42271e+06	651655	1.33248e+06
P26516	4	4	148.24	26S proteasome non-ATPase regulatory subunit 7 OS=Mus musculus GN=Psmd7 PE=1 SV=2	Psmd7	170438	186979	170438	525230	734664	653855	551292	478696	678613	1.23332e+06	501621	660616	980494	1.17964e+06	1.54144e+06	1.75988e+06	526203	1.17358e+06	1.30894e+06	2.14252e+06	1.72533e+06	1.56627e+06	3.50396e+06	3.90619e+06
Q62419	2	2	77.03	Endophilin-A2 OS=Mus musculus GN=Sh3gl1 PE=1 SV=1	Sh3gl1	0	0	0	0	0	0	19386	22233.5	116116	151828	27036.3	42821.7	163192	196134	104468	177861	126966	224901	203821	234398	133922	69768.2	261729	309053
Q8CH72	2	2	110.43	E3 ubiquitin-protein ligase TRIM32 OS=Mus musculus GN=Trim32 PE=1 SV=2	Trim32	0	0	0	0	0	0	100975	63775.6	360466	447623	5027.13	22702.3	344283	344563	226865	95328.7	190989	348071	452280	797561	504990	467467	634902	463127
Q61584	2	2	138.54	Fragile X mental retardation syndrome-related protein 1 OS=Mus musculus GN=Fxr1 PE=1 SV=2	Fxr1	0	0	0	0	0	0	115219	183057	119678	91563.4	205381	13952.4	252610	218943	408313	699199	57851.3	242451	0	0	0	0	0	0
P62281	2	2	58.87	40S ribosomal protein S11 OS=Mus musculus GN=Rps11 PE=1 SV=3	Rps11	0	0	0	0	0	0	326111	15354.3	10293.9	19577.4	39235.1	7405.12	435485	480284	545452	605940	58335.5	412440	1.02259e+06	1.90308e+06	1.47784e+06	1.57589e+06	2.2989e+06	2.83898e+06
Q9DCH4	2	2	86.12	Eukaryotic translation initiation factor 3 subunit F OS=Mus musculus GN=Eif3f PE=1 SV=2	Eif3f	0	0	0	0	0	0	205853	217620	440184	651260	271626	101733	314961	339651	478355	449794	198703	248173	474743	195927	938760	432309	417222	129513
O54833	2	2	91.57	Casein kinase II subunit alpha' OS=Mus musculus GN=Csnk2a2 PE=1 SV=1	Csnk2a2	0	0	0	0	0	0	5621.73	60219	300144	392814	231162	202317	679962	999657	331230	638554	393996	776050	0	0	0	0	0	0
Q8VE47	2	2	68.3	Ubiquitin-like modifier-activating enzyme 5 OS=Mus musculus GN=Uba5 PE=1 SV=2	Uba5	0	0	0	0	0	0	76183.5	84229.6	117198	133551	190526	120192	104062	61149.3	97913.5	78782	75303.3	145921	170221	466608	140442	66384.9	359349	79653.8
Q68ED7	1	1	47.49	CREB-regulated transcription coactivator 1 OS=Mus musculus GN=Crtc1 PE=1 SV=1	Crtc1	0	0	0	0	0	0	647646	342220	2.23904e+06	2.92193e+06	1.58127e+06	2.21993e+06	8449.24	17037.3	18721.9	1100.46	48898.8	59762.5	246748	36017.9	23914.7	6076.74	16635.9	18701.1
Q9EQU5	1	1	33.01	Protein SET OS=Mus musculus GN=Set PE=1 SV=1	Set	0	0	0	0	0	0	2.96632e+06	779420	1.03379e+06	1.97723e+06	615663	3.72546e+06	2.06665e+06	3.28253e+06	2.88437e+06	4.34165e+06	1.14812e+06	1.4015e+06	3.27183e+06	5.44759e+06	9.56396e+06	1.01186e+07	2.39008e+06	444890
Q99KP6	1	1	16.04	Pre-mRNA-processing factor 19 OS=Mus musculus GN=Prpf19 PE=1 SV=1	Prpf19	0	0	0	0	0	0	1.38379e+06	2.02431e+06	2.16747e+06	4.1968e+06	735240	987150	171225	180731	170068	269298	152201	257257	594011	615625	607887	587415	1.29929e+06	1.12489e+06
P61087	1	1	95.04	Ubiquitin-conjugating enzyme E2 K OS=Mus musculus GN=Ube2k PE=1 SV=3	Ube2k	0	0	0	0	0	0	914716	405833	2.09595e+06	3.09949e+06	2.62533e+06	2.06706e+06	534202	385342	586113	1.58417e+06	650379	1.61275e+06	837144	1.53341e+06	591704	801672	2.84931e+06	2.45208e+06
Q9EPU0	1	1	23.4	Regulator of nonsense transcripts 1 OS=Mus musculus GN=Upf1 PE=1 SV=2	Upf1	0	0	0	0	0	0	4.41268e+06	4.21283e+06	2.07769e+06	3.29741e+06	3.01493e+06	3.12468e+06	651580	1.36524e+06	914402	2.16974e+06	619497	1.16352e+06	0	0	0	0	0	0
P05132	2	2	67.47	cAMP-dependent protein kinase catalytic subunit alpha OS=Mus musculus GN=Prkaca PE=1 SV=3	Prkaca	0	0	0	0	0	0	519306	55418	4396.84	5717.01	277231	302854	2062.09	3740.99	4238.69	9655.14	63776.4	6593.96	0	0	0	0	0	0
Q9Z1R2	2	2	88.37	Large proline-rich protein BAG6 OS=Mus musculus GN=Bag6 PE=1 SV=1	Bag6	0	0	0	0	0	0	274605	237099	896712	1.78506e+06	419964	602670	87181.1	84104.9	144306	205917	121668	254985	86644.7	111039	158155	152245	44649.9	101709
Q6ZPE2	2	2	99.4	Myotubularin-related protein 5 OS=Mus musculus GN=Sbf1 PE=1 SV=2	Sbf1	0	0	0	0	0	0	133028	109738	951534	1.40895e+06	486394	455977	734060	698910	706080	572397	476433	676448	1.43556e+06	1.88085e+06	2.38871e+06	1.89234e+06	2.44537e+06	2.43815e+06
Q8K2C6	2	2	87.6	NAD-dependent protein deacylase sirtuin-5, mitochondrial OS=Mus musculus GN=Sirt5 PE=1 SV=1	Sirt5	0	0	0	0	0	0	189140	117720	257501	276635	106768	130988	96509.7	156582	240625	693696	102189	176389	0	0	0	0	0	0
Q9D0R2	2	2	79.61	Threonine--tRNA ligase, cytoplasmic OS=Mus musculus GN=Tars PE=1 SV=2	Tars	0	0	0	0	0	0	370118	670232	1.39833e+06	1.79321e+06	741205	718658	1.19428e+06	1.30838e+06	957580	1.7561e+06	695198	1.2274e+06	1.13707e+06	1.2585e+06	1.92041e+06	1.67418e+06	2.16217e+06	3.95662e+06
Q9JI90	2	2	161.15	E3 ubiquitin-protein ligase RNF14 OS=Mus musculus GN=Rnf14 PE=1 SV=2	Rnf14	0	0	0	0	0	0	129708	217996	605649	790021	1.34493e+06	356069	858122	620853	1.96316e+06	1.76515e+06	817094	609788	1.88071e+06	1.54573e+06	2.20728e+06	1.16048e+06	2.2458e+06	326976
Q921H8	2	2	126.83	3-ketoacyl-CoA thiolase A, peroxisomal OS=Mus musculus GN=Acaa1a PE=1 SV=1	Acaa1a	0	0	0	0	0	0	429744	429186	251444	302754	498752	437747	424132	518613	1.05727e+06	808487	111052	471407	389833	280680	592631	246099	850286	104078
Q9R1P1	2	2	86.29	Proteasome subunit beta type-3 OS=Mus musculus GN=Psmb3 PE=1 SV=1	Psmb3	0	0	0	0	0	0	201055	456012	1.25381e+06	1.66522e+06	942227	1.04418e+06	241747	307866	1.29582e+06	1.87412e+06	274332	496082	0	0	0	0	0	0
P54823	1	1	39.6	Probable ATP-dependent RNA helicase DDX6 OS=Mus musculus GN=Ddx6 PE=1 SV=1	Ddx6	0	0	0	0	0	0	124700	113776	32916.2	95400.2	80187.9	121850	65510.5	90045.3	116780	77243.3	63471.6	84418	45343.1	17800.2	1735.49	16312.2	36332.2	106478
Q8BWG8	1	1	23.16	Beta-arrestin-1 OS=Mus musculus GN=Arrb1 PE=1 SV=1	Arrb1	0	0	0	0	0	0	575883	189489	337724	577814	37223.9	61165.5	487617	337249	102437	389851	320308	655842	0	0	0	0	0	0
O55234	1	1	50.91	Proteasome subunit beta type-5 OS=Mus musculus GN=Psmb5 PE=1 SV=3	Psmb5	0	0	0	0	0	0	122072	209997	3908.08	362.715	108267	101504	0	0	0	0	0	0	0	0	0	0	0	0
Q8K3G9	1	1	45.42	DCC-interacting protein 13-beta OS=Mus musculus GN=Appl2 PE=1 SV=1	Appl2	0	0	0	0	0	0	281020	369793	367304	372083	808187	196020	0	0	0	0	0	0	0	0	0	0	0	0
Q9JIF0	1	1	33.45	Protein arginine N-methyltransferase 1 OS=Mus musculus GN=Prmt1 PE=1 SV=1	Prmt1	0	0	0	0	0	0	32734.4	25673.7	178730	396073	414393	379166	37874	35078.5	109546	181649	52280.9	50733.8	0	0	0	0	0	0
Q91WC0	1	1	65.1	Histone-lysine N-methyltransferase setd3 OS=Mus musculus GN=Setd3 PE=1 SV=1	Setd3	0	0	0	0	0	0	264213	2266.51	202686	342953	157596	174807	0	0	0	0	0	0	561798	922408	761554	649353	1.20507e+06	1.408e+06
Q8R5H1	1	1	21.66	Ubiquitin carboxyl-terminal hydrolase 15 OS=Mus musculus GN=Usp15 PE=1 SV=1	Usp15	0	0	0	0	0	0	29513	5974	75304.3	108451	134200	113307	335613	468791	344438	555942	110615	233855	376345	721568	519948	491470	660435	833430
A2AN08	1	1	55.05	E3 ubiquitin-protein ligase UBR4 OS=Mus musculus GN=Ubr4 PE=1 SV=1	Ubr4	0	0	0	0	0	0	28913.8	14341.7	87651.8	164718	0	39332.2	217533	397433	169380	169147	145322	336400	253386	446986	110639	129197	453503	429604
Q9JLN9	1	1	27.34	Serine/threonine-protein kinase mTOR OS=Mus musculus GN=Mtor PE=1 SV=2	Mtor	0	0	0	0	0	0	101504	41404.6	204044	238814	14536.8	20392.5	0	0	0	0	0	0	0	0	0	0	0	0
Q922B1	1	1	68.69	O-acetyl-ADP-ribose deacetylase MACROD1 OS=Mus musculus GN=Macrod1 PE=1 SV=2	Macrod1	0	0	0	0	0	0	1951.17	787.901	27128.2	55004.5	114236	0	964763	1.42471e+06	1.293e+06	1.6914e+06	570915	881934	1.59145e+06	2.09208e+06	1.41665e+06	1.48066e+06	3.31555e+06	3.5211e+06
Q61191	1	1	20.56	Host cell factor 1 OS=Mus musculus GN=Hcfc1 PE=1 SV=2	Hcfc1	0	0	0	0	0	0	21747.4	44119.2	123772	146213	4862.07	15959.4	528140	502729	857044	807945	569660	1.0336e+06	0	0	0	0	0	0
E9Q555	1	1	18.29	E3 ubiquitin-protein ligase RNF213 OS=Mus musculus GN=Rnf213 PE=1 SV=2	Rnf213	0	0	0	0	0	0	0	0	0	0	56147.6	0	0	0	0	0	0	0	0	0	0	0	0	0
O35344	1	1	39.17	Importin subunit alpha-4 OS=Mus musculus GN=Kpna3 PE=1 SV=1	Kpna3	0	0	0	0	0	0	13467.3	26453.3	0	0	16284.8	45675.9	36657.9	36442.2	76255.3	76863.8	0	25812	21240	95490.2	665.771	36205.7	147115	195884
Q91VH2	1	1	23.29	Sorting nexin-9 OS=Mus musculus GN=Snx9 PE=1 SV=1	Snx9	0	0	0	0	0	0	88915.8	343116	72309.1	15634.1	30843.2	625064	0	0	0	0	0	0	0	0	0	0	0	0
Q91WA4	1	1	23.46	CXXC-type zinc finger protein 5 OS=Mus musculus GN=Cxxc5 PE=2 SV=1	Cxxc5	0	0	0	0	0	0	88302.7	66885.5	33985.3	59578.1	264716	331594	0	0	0	0	0	0	0	0	0	0	0	0
O70481	1	1	42.49	E3 ubiquitin-protein ligase UBR1 OS=Mus musculus GN=Ubr1 PE=1 SV=2	Ubr1	0	0	0	0	0	0	27490.4	24001.5	107176	243265	40360.4	40842.3	0	0	0	0	0	0	0	0	0	0	0	0
O35658	1	1	27.98	Complement component 1 Q subcomponent-binding protein, mitochondrial OS=Mus musculus GN=C1qbp PE=1 SV=1	C1qbp	0	0	0	0	0	0	442159	790520	1.50685e+06	1.68221e+06	2.33928e+06	218114	0	0	0	0	0	0	0	0	0	0	0	0
Q99K48	1	1	53.34	Non-POU domain-containing octamer-binding protein OS=Mus musculus GN=Nono PE=1 SV=3	Nono	0	0	0	0	0	0	414283	273989	1.29528e+06	1.30314e+06	1.60738e+06	5.30702e+06	816361	987550	1.21139e+06	699589	748172	758871	459775	509770	578415	251818	791493	410010
Q8BLF1	1	1	18.64	Neutral cholesterol ester hydrolase 1 OS=Mus musculus GN=Nceh1 PE=1 SV=1	Nceh1	0	0	0	0	0	0	1.09479e+06	1.23045e+06	1.38227e+06	1.75018e+06	1.10492e+06	172787	0	0	0	0	0	0	1.20622e+06	888526	2.50826e+06	974900	1.0683e+06	358657
Q9WUP7	1	1	26.13	Ubiquitin carboxyl-terminal hydrolase isozyme L5 OS=Mus musculus GN=Uchl5 PE=1 SV=2	Uchl5	0	0	0	0	0	0	27859.5	359178	619756	1.09569e+06	2239.12	89096.8	57688.6	131111	97996	310648	16488.6	28498.6	684132	528949	2.6893e+06	2.08226e+06	1.18415e+06	1.12143e+06
Q80UY2	1	1	18.77	E3 ubiquitin-protein ligase KCMF1 OS=Mus musculus GN=Kcmf1 PE=1 SV=1	Kcmf1	0	0	0	0	0	0	647784	471466	410796	781533	484491	425395	0	0	0	0	0	0	0	0	0	0	0	0
P34152	1	1	69.56	Focal adhesion kinase 1 OS=Mus musculus GN=Ptk2 PE=1 SV=3	Ptk2	0	0	0	0	0	0	109408	62717.4	241998	341863	64857.4	168422	36996.6	38897.8	123907	192528	80741.5	178370	236448	279418	95689.7	187437	146689	89304.4
P97371	1	1	142.61	Proteasome activator complex subunit 1 OS=Mus musculus GN=Psme1 PE=1 SV=2	Psme1	0	0	0	0	0	0	403876	338349	949297	1.67232e+06	713282	945942	486356	1.06818e+06	468310	787337	224851	394962	898267	1.3524e+06	4.50542e+06	4.05094e+06	978479	34292.7
F6ZDS4	1	1	48.24	Nucleoprotein TPR OS=Mus musculus GN=Tpr PE=1 SV=1	Tpr	0	0	0	0	0	0	721358	100039	562242	1.02714e+06	187957	134947	584955	734684	581726	1.00446e+06	742541	691644	0	0	0	0	0	0
Q9ESZ8	1	1	13.24	General transcription factor II-I OS=Mus musculus GN=Gtf2i PE=1 SV=3	Gtf2i	0	0	0	0	0	0	745490	699697	164760	390574	158285	164510	0	0	0	0	0	0	0	0	0	0	0	0
P70195	1	1	22.12	Proteasome subunit beta type-7 OS=Mus musculus GN=Psmb7 PE=1 SV=1	Psmb7	0	0	0	0	0	0	80086.4	70493.2	1.16664e+06	1.16817e+06	1.07374e+06	1.41194e+06	0	0	0	0	0	0	0	0	0	0	0	0
Q9D0L8	1	1	35.78	mRNA cap guanine-N7 methyltransferase OS=Mus musculus GN=Rnmt PE=1 SV=1	Rnmt	0	0	0	0	0	0	138946	446787	387425	647699	189542	223651	117043	94216.4	87138.7	29083.8	119243	317065	0	0	0	0	0	0
A2A935	1	1	26.73	PR domain zinc finger protein 16 OS=Mus musculus GN=Prdm16 PE=1 SV=1	Prdm16	0	0	0	0	0	0	126411	72523.8	0	0	295976	397791	0	0	0	0	0	0	55225.3	141435	8439.38	24951.5	946.828	18555.9
P61290	1	1	38.76	Proteasome activator complex subunit 3 OS=Mus musculus GN=Psme3 PE=1 SV=1	Psme3	0	0	0	0	0	0	544104	912679	1.3353e+06	2.1607e+06	1.03045e+06	1.14395e+06	444007	640148	563824	108968	785709	886160	0	0	0	0	0	0
Q9CZ04	3	3	145.49	COP9 signalosome complex subunit 7a OS=Mus musculus GN=Cops7a PE=1 SV=2	Cops7a	0	0	0	0	0	0	180056	318417	752620	1.23102e+06	364139	65974.3	0	0	0	0	0	0	170156	249838	460402	510649	155766	40678.4
Q922Y1	3	3	223.4	UBX domain-containing protein 1 OS=Mus musculus GN=Ubxn1 PE=1 SV=1	Ubxn1	0	0	0	0	0	0	904971	1.2862e+06	2.48771e+06	3.65504e+06	2.24916e+06	2.13814e+06	1.80429e+06	2.06017e+06	1.52957e+06	1.21782e+06	1.48976e+06	2.23871e+06	4.16449e+06	5.34309e+06	2.25459e+06	1.97555e+06	3.70245e+06	4.82381e+06
O08529	3	3	164.26	Calpain-2 catalytic subunit OS=Mus musculus GN=Capn2 PE=1 SV=4	Capn2	0	0	0	0	0	0	204951	142961	232167	402823	767117	317493	502276	558786	512368	676133	480657	804550	684503	1.04057e+06	580937	817574	924276	1.23291e+06
O09061	3	3	192.97	Proteasome subunit beta type-1 OS=Mus musculus GN=Psmb1 PE=1 SV=1	Psmb1	0	0	0	0	0	0	692429	839941	953036	1.72923e+06	938442	1.04786e+06	339354	297998	292278	801799	182043	305494	645582	1.05829e+06	475264	374327	2.2525e+06	3.22629e+06
P70398	3	3	142.79	Probable ubiquitin carboxyl-terminal hydrolase FAF-X OS=Mus musculus GN=Usp9x PE=1 SV=2	Usp9x	0	0	0	0	0	0	258114	219830	237974	242617	367447	128370	145255	253004	190349	385890	139881	253369	313439	253338	233632	323087	329407	645789
O70435	3	3	180.72	Proteasome subunit alpha type-3 OS=Mus musculus GN=Psma3 PE=1 SV=3	Psma3	0	0	0	0	0	0	144457	71886.6	296542	325179	155126	164502	3267.58	118917	140989	137599	18141.6	42061.1	0	0	0	0	0	0
P51881	4	4	295.45	ADP/ATP translocase 2 OS=Mus musculus GN=Slc25a5 PE=1 SV=3	Slc25a5	0	0	0	0	0	0	1.83462e+06	1.95651e+06	124611	279733	702371	222795	248915	283247	29803.7	49615.8	219094	261716	594559	469809	1.54649e+06	1.16482e+06	652852	965212
A2AGT5	4	4	194.28	Cytoskeleton-associated protein 5 OS=Mus musculus GN=Ckap5 PE=1 SV=1	Ckap5	0	0	0	0	0	0	779913	635449	656874	1.18845e+06	462762	448230	367053	464994	546981	747404	302389	577719	0	0	0	0	0	0
Q922H2	1	1	25.08	[Pyruvate dehydrogenase (acetyl-transferring)] kinase isozyme 3, mitochondrial OS=Mus musculus GN=Pdk3 PE=1 SV=1	Pdk3	0	0	0	0	0	0	0	0	0	0	0	0	311904	379556	356543	602815	384334	471668	0	0	0	0	0	0
O88986	1	1	22.39	2-amino-3-ketobutyrate coenzyme A ligase, mitochondrial OS=Mus musculus GN=Gcat PE=1 SV=2	Gcat	0	0	0	0	0	0	0	0	0	0	0	0	16372.7	39044	8996.54	14786.8	53988.3	73877.6	0	0	0	0	0	0
Q9EST5	1	1	66.98	Acidic leucine-rich nuclear phosphoprotein 32 family member B OS=Mus musculus GN=Anp32b PE=1 SV=1	Anp32b	0	0	0	0	0	0	0	0	0	0	0	0	692482	1.04322e+06	767735	1.03165e+06	1.5198e+06	604574	615728	1.28837e+06	528321	856537	1.28015e+06	921830
Q8K019	1	1	23.63	Bcl-2-associated transcription factor 1 OS=Mus musculus GN=Bclaf1 PE=1 SV=2	Bclaf1	0	0	0	0	0	0	0	0	0	0	0	0	3409.18	3296.87	9437.05	176471	1057.14	3578.68	0	0	0	0	0	0
Q8CCN5	1	1	32.35	Breast carcinoma-amplified sequence 3 homolog OS=Mus musculus GN=Bcas3 PE=1 SV=2	Bcas3	0	0	0	0	0	0	0	0	0	0	0	0	295488	213856	255119	414899	258160	586255	0	0	0	0	0	0
Q9JMD0	1	1	27.42	BUB3-interacting and GLEBS motif-containing protein ZNF207 OS=Mus musculus GN=Znf207 PE=1 SV=1	Znf207	0	0	0	0	0	0	0	0	0	0	0	0	25956.2	8711.11	55989.5	119550	0	112836	69825.8	129748	8841.37	44738.3	53055.4	48791.8
Q8C196	1	1	22.04	Carbamoyl-phosphate synthase [ammonia], mitochondrial OS=Mus musculus GN=Cps1 PE=1 SV=2	Cps1	0	0	0	0	0	0	0	0	0	0	0	0	572785	533958	1.19362e+06	1.63859e+06	209990	704252	0	0	0	0	0	0
Q6PDQ2	1	1	19.26	Chromodomain-helicase-DNA-binding protein 4 OS=Mus musculus GN=Chd4 PE=1 SV=1	Chd4	0	0	0	0	0	0	0	0	0	0	0	0	1.32438e+07	1.34218e+07	1.32788e+07	1.57862e+07	5.59042e+06	1.03233e+07	0	0	0	0	0	0
Q91YQ3	1	1	17.62	Cold shock domain-containing protein C2 OS=Mus musculus GN=Csdc2 PE=1 SV=2	Csdc2	0	0	0	0	0	0	0	0	0	0	0	0	4.53269e+06	3.97658e+06	3.41213e+06	3.71476e+06	3.63972e+06	5.0293e+06	0	0	0	0	0	0
Q8JZY2	1	1	24.04	COMM domain-containing protein 10 OS=Mus musculus GN=Commd10 PE=1 SV=1	Commd10	0	0	0	0	0	0	0	0	0	0	0	0	41899.8	28810.5	31435.9	90538.8	41181.9	52301.1	0	0	0	0	0	0
Q91WT9	1	1	14.21	Cystathionine beta-synthase OS=Mus musculus GN=Cbs PE=1 SV=3	Cbs	0	0	0	0	0	0	0	0	0	0	0	0	146613	316282	198314	78956.5	150968	187380	0	0	0	0	0	0
Q9D6N5	1	1	39.5	Dr1-associated corepressor OS=Mus musculus GN=Drap1 PE=1 SV=3	Drap1	0	0	0	0	0	0	0	0	0	0	0	0	297891	822.152	156611	23287.9	31749	83680.9	0	0	0	0	0	0
Q7TPM6	2	2	100.26	Fibronectin type III and SPRY domain-containing protein 1 OS=Mus musculus GN=Fsd1 PE=1 SV=1	Fsd1	0	0	0	0	0	0	0	0	0	0	0	0	523957	495353	408815	258719	451072	529008	0	0	0	0	0	0
Q61249	1	1	25.88	Immunoglobulin-binding protein 1 OS=Mus musculus GN=Igbp1 PE=1 SV=1	Igbp1	0	0	0	0	0	0	0	0	0	0	0	0	748556	941192	310186	12330.9	634357	842259	0	0	0	0	0	0
P53395	1	1	92.71	Lipoamide acyltransferase component of branched-chain alpha-keto acid dehydrogenase complex, mitochondrial OS=Mus musculus GN=Dbt PE=1 SV=2	Dbt	0	0	0	0	0	0	0	0	0	0	0	0	536173	520563	753899	707745	317118	405058	658167	749192	676464	516512	1.57089e+06	1.38048e+06
Q8BP48	1	1	26.63	Methionine aminopeptidase 1 OS=Mus musculus GN=Metap1 PE=1 SV=1	Metap1	0	0	0	0	0	0	0	0	0	0	0	0	71915.9	82714	114033	224498	30188.4	34644.4	63609.2	123571	39216.1	70915.9	107569	24360.7
Q8JZV7	1	1	72.6	N-acetylglucosamine-6-phosphate deacetylase OS=Mus musculus GN=Amdhd2 PE=1 SV=1	Amdhd2	0	0	0	0	0	0	0	0	0	0	0	0	515700	533314	606124	1.67331e+06	243354	526670	728828	1.058e+06	506639	720423	1.19446e+06	801831
P67778	1	1	55.85	Prohibitin OS=Mus musculus GN=Phb PE=1 SV=1	Phb	0	0	0	0	0	0	0	0	0	0	0	0	311373	684309	236447	588159	239352	381363	95623.4	72016.8	16916.3	98468	83413.4	153942
P62305	1	1	21.19	Small nuclear ribonucleoprotein E OS=Mus musculus GN=Snrpe PE=1 SV=1	Snrpe	0	0	0	0	0	0	0	0	0	0	0	0	679713	1.10003e+06	707781	671806	764728	1.0338e+06	0	0	0	0	0	0
P62309	1	1	55.76	Small nuclear ribonucleoprotein G OS=Mus musculus GN=Snrpg PE=1 SV=1	Snrpg	0	0	0	0	0	0	0	0	0	0	0	0	10021.9	2209.33	6310.96	4060.32	67115.8	2668.75	0	0	0	0	0	0
Q8BMS4	1	1	76.45	Ubiquinone biosynthesis O-methyltransferase, mitochondrial OS=Mus musculus GN=Coq3 PE=1 SV=1	Coq3	0	0	0	0	0	0	0	0	0	0	0	0	455041	470626	622100	535864	462945	380335	643760	717461	360136	329991	1.02187e+06	990461
Q9D906	1	1	17.08	Ubiquitin-like modifier-activating enzyme ATG7 OS=Mus musculus GN=Atg7 PE=1 SV=1	Atg7	0	0	0	0	0	0	0	0	0	0	0	0	79156.3	97439.3	110954	174776	6184.03	14847.2	73382.1	146510	51099.9	64093.3	218078	261477
Q8R395	1	1	40.69	COMM domain-containing protein 5 OS=Mus musculus GN=Commd5 PE=1 SV=1	Commd5	0	0	0	0	0	0	0	0	0	0	0	0	0	0	0	0	0	0	1.26911e+06	1.68592e+06	1.9162e+06	2.02364e+06	4.18233e+06	5.12783e+06
A2A432	1	1	35.9	Cullin-4B OS=Mus musculus GN=Cul4b PE=1 SV=1	Cul4b	0	0	0	0	0	0	0	0	0	0	0	0	0	0	0	0	0	0	47723.8	113544	70183.9	240884	255688	192841
P49718	1	1	18.53	DNA replication licensing factor MCM5 OS=Mus musculus GN=Mcm5 PE=1 SV=1	Mcm5	0	0	0	0	0	0	0	0	0	0	0	0	0	0	0	0	0	0	1902.03	207397	1.55344e+06	950526	35964.7	75691.7
P28352	1	1	68.44	DNA-(apurinic or apyrimidinic site) lyase OS=Mus musculus GN=Apex1 PE=1 SV=2	Apex1	0	0	0	0	0	0	0	0	0	0	0	0	0	0	0	0	0	0	286364	410158	232386	259612	294469	307104
Q9JLI8	2	2	67.36	Squamous cell carcinoma antigen recognized by T-cells 3 OS=Mus musculus GN=Sart3 PE=1 SV=1	Sart3	31330	16736	31330	383102	39383.2	82697.1	77078.8	217366	110552	248414	119518	176277	747704	864568	825121	869785	363091	692817	1.56726e+06	2.52945e+06	1.7751e+06	1.11663e+06	2.92924e+06	2.69476e+06
Q9JKX6	2	2	77.79	ADP-sugar pyrophosphatase OS=Mus musculus GN=Nudt5 PE=1 SV=1	Nudt5	326701	230594	326701	261456	114104	202323	17245.4	76553.4	0	3260.3	58986.6	76789.7	253434	121686	312146	327644	321689	504465	697907	833977	472173	478615	399046	535293
Q8C1M2	1	1	25.74	Zinc finger protein 428 OS=Mus musculus GN=Znf428 PE=1 SV=1	Znf428	552358	733040	552358	480819	11406.2	30417.5	0	0	0	0	0	0	0	0	0	0	0	0	0	0	0	0	0	0
Q8BGW1	1	1	45.15	Alpha-ketoglutarate-dependent dioxygenase FTO OS=Mus musculus GN=Fto PE=1 SV=1	Fto	131250	154463	131250	32949.8	28488.3	45064	0	0	0	0	0	0	118675	170720	83500.9	1485.06	31232.6	61578.2	0	0	0	0	0	0
Q62077	1	1	22.96	1-phosphatidylinositol 4,5-bisphosphate phosphodiesterase gamma-1 OS=Mus musculus GN=Plcg1 PE=1 SV=2	Plcg1	671174	790088	671174	729980	174743	437719	123122	106791	369411	479386	86399.3	276375	169298	171706	170869	339175	132026	220693	338004	374241	246505	177380	360607	569957
P61963	1	1	26.45	DDB1- and CUL4-associated factor 7 OS=Mus musculus GN=Dcaf7 PE=1 SV=1	Dcaf7	669.696	0	669.696	69421.1	6505.99	14318.8	0	0	0	0	0	0	191675	193316	377953	536680	149676	229029	294968	169823	214008	284513	418344	436279
Q91YS8	1	1	30.4	Calcium/calmodulin-dependent protein kinase type 1 OS=Mus musculus GN=Camk1 PE=1 SV=1	Camk1	0	0	0	274833	12748	58.4489	0	0	0	0	0	0	182946	135386	133970	255146	136304	350801	212276	412159	146606	186087	175782	104286
Q6P8I4	1	1	35.16	PEST proteolytic signal-containing nuclear protein OS=Mus musculus GN=Pcnp PE=1 SV=1	Pcnp	28935.5	2840.5	28935.5	391.934	0	90.1084	0	0	0	0	0	0	0	0	0	0	0	0	0	0	0	0	0	0
O08759	1	1	55.19	Ubiquitin-protein ligase E3A OS=Mus musculus GN=Ube3a PE=1 SV=2	Ube3a	1.3075e+06	1.94782e+06	1.3075e+06	1.43918e+06	377426	730856	23548.3	95926	419141	492719	725604	768945	515929	735447	163148	109960	451550	725144	557803	480147	157904	151473	158114	143897
Q69ZR2	1	1	32.76	E3 ubiquitin-protein ligase HECTD1 OS=Mus musculus GN=Hectd1 PE=1 SV=2	Hectd1	103976	76648.6	103976	206080	124212	95363	0	0	0	0	0	0	149057	127376	116717	1919.82	203652	264505	0	0	0	0	0	0
P19785	1	1	24.32	Estrogen receptor OS=Mus musculus GN=Esr1 PE=1 SV=1	Esr1	91709.4	688036	91709.4	298057	651803	898205	0	0	0	0	0	0	0	0	0	0	0	0	0	0	0	0	0	0
P97783	1	1	36.54	Protein AF1q OS=Mus musculus GN=Mllt11 PE=1 SV=1	Mllt11	522543	761876	522543	506652	210691	687705	10994.2	14527.2	298870	585254	373086	345888	718079	860204	553425	1.2748e+06	268634	534489	540932	951486	1.13116e+06	1.00363e+06	1.96678e+06	2.44378e+06
P63330	6	6	404.53	Serine/threonine-protein phosphatase 2A catalytic subunit alpha isoform OS=Mus musculus GN=Ppp2ca PE=1 SV=1	Ppp2ca	5.59442e+06	7.72961e+06	5.59442e+06	7.65786e+06	4.87825e+06	5.75963e+06	5.31864e+06	4.22593e+06	7.11574e+06	9.96723e+06	7.24175e+06	1.0126e+07	5.20473e+06	6.32169e+06	6.01432e+06	8.00669e+06	3.93652e+06	7.22603e+06	7.64498e+06	1.23226e+07	6.96234e+06	6.87996e+06	1.41039e+07	1.50406e+07
Q9Z1F9	4	4	182.12	SUMO-activating enzyme subunit 2 OS=Mus musculus GN=Uba2 PE=1 SV=1	Uba2	1.14152e+06	1.56943e+06	1.14152e+06	2.56721e+06	3.07331e+06	1.88385e+06	2.29245e+06	1.58174e+06	1.12616e+06	1.66335e+06	2.35861e+06	1.51996e+06	1.77974e+06	2.43698e+06	1.8346e+06	1.1445e+06	1.28137e+06	2.85732e+06	1.52917e+06	3.08775e+06	3.08207e+06	3.09964e+06	3.11215e+06	3.50813e+06
Q3U7U3	2	2	63.16	F-box only protein 7 OS=Mus musculus GN=Fbxo7 PE=1 SV=2	Fbxo7	0	0	0	0	0	0	49559.3	228967	805565	1.01627e+06	58496.1	306224	456810	644833	536969	678812	327788	510153	587450	899106	405840	217247	75768.8	29490.2
Q9QXM1	1	1	22.12	Junction-mediating and -regulatory protein OS=Mus musculus GN=Jmy PE=1 SV=1	Jmy	0	0	0	0	0	0	1.34416e+06	1.00071e+06	1.27517e+06	2.53833e+06	1.63784e+06	2.07757e+06	0	0	0	0	0	0	0	0	0	0	0	0
Q6I6G8	1	1	38.72	E3 ubiquitin-protein ligase HECW2 OS=Mus musculus GN=Hecw2 PE=1 SV=1	Hecw2	0	0	0	0	0	0	40927.2	14651.7	255327	453127	152511	163123	57148.4	20268.5	35173.7	140758	120235	182189	0	0	0	0	0	0
Q8BY87	1	1	27.71	Ubiquitin carboxyl-terminal hydrolase 47 OS=Mus musculus GN=Usp47 PE=1 SV=2	Usp47	0	0	0	0	0	0	86021.7	217144	150002	242080	58738.6	38555	166732	320792	355540	862507	153291	305621	0	0	0	0	0	0
Q99MP8	1	1	49.66	BRCA1-associated protein OS=Mus musculus GN=Brap PE=1 SV=1	Brap	0	0	0	0	0	0	343683	74637	104584	181195	89495	130927	28597	71410.4	60129.1	151606	67759.1	97707.9	0	0	0	0	0	0
Q3TYX3	1	1	31.32	SET and MYND domain-containing protein 5 OS=Mus musculus GN=Smyd5 PE=1 SV=2	Smyd5	0	0	0	0	0	0	207105	87851.3	113256	144351	145992	298320	0	0	0	0	0	0	0	0	0	0	0	0
Q9Z1K5	1	1	60.51	E3 ubiquitin-protein ligase ARIH1 OS=Mus musculus GN=Arih1 PE=1 SV=3	Arih1	0	0	0	0	0	0	20554.3	15024.7	760686	921571	10633	2548.31	0	0	0	0	0	0	0	0	0	0	0	0
Q8BV13	1	1	64.02	COP9 signalosome complex subunit 7b OS=Mus musculus GN=Cops7b PE=1 SV=1	Cops7b	0	0	0	0	0	0	79738.1	84850	200050	246074	328502	26393.6	0	0	0	0	0	0	159977	10416.7	122401	53156.9	190879	21185.8
Q8CIG8	1	1	48.31	Protein arginine N-methyltransferase 5 OS=Mus musculus GN=Prmt5 PE=1 SV=3	Prmt5	0	0	0	0	0	0	2.03614e+06	1.04593e+06	1.31939e+06	2.47002e+06	1.68016e+06	1.63855e+06	433052	408187	693955	708458	230940	330182	766164	982095	984119	809290	2.24201e+06	2.59145e+06
Q8C7R4	1	1	27.63	Ubiquitin-like modifier-activating enzyme 6 OS=Mus musculus GN=Uba6 PE=1 SV=1	Uba6	0	0	0	0	0	0	112789	121733	211864	298579	189298	180543	93201.2	58250	78708	205899	92962.2	251399	0	0	0	0	0	0
P59759	1	1	20.16	MKL/myocardin-like protein 2 OS=Mus musculus GN=Mkl2 PE=1 SV=1	Mkl2	0	0	0	0	0	0	28493.6	3734.8	727366	779063	9806.65	19905.9	9298.78	16339.5	36104.8	10342.4	96510.3	139241	0	0	0	0	0	0
Q91WU5	1	1	33.86	Arsenite methyltransferase OS=Mus musculus GN=As3mt PE=1 SV=2	As3mt	0	0	0	0	0	0	0	0	0	0	0	0	500806	949326	488714	679660	300612	430571	505551	794917	1.02409e+06	883743	563679	240387
Q3U827	1	1	17.48	E3 ubiquitin-protein ligase RNF180 OS=Mus musculus GN=Rnf180 PE=1 SV=2	Rnf180	0	0	0	0	0	0	0	0	0	0	0	0	1.91998e+07	1.76928e+07	2.73312e+07	3.69429e+07	1.21271e+07	1.51357e+07	2.46655e+07	3.89892e+07	1.90441e+07	1.71108e+07	6.52199e+07	7.40888e+07
Q91W61	2	2	87.78	F-box/LRR-repeat protein 15 OS=Mus musculus GN=Fbxl15 PE=1 SV=2	Fbxl15	0	0	0	0	0	0	0	0	0	0	0	0	341869	397400	322741	511208	209832	329657	232236	301964	525183	194310	94762.9	17700.1
Q9QY36	1	1	21.77	N-alpha-acetyltransferase 10 OS=Mus musculus GN=Naa10 PE=1 SV=1	Naa10	0	0	0	0	0	0	0	0	0	0	0	0	142927	178974	227758	181478	171999	218577	170770	380921	44908.2	103478	264721	309513
Q80ZJ6	1	1	41.6	Protein zer-1 homolog OS=Mus musculus GN=Zer1 PE=1 SV=1	Zer1	0	0	0	0	0	0	0	0	0	0	0	0	22489.8	48590.2	4763.64	0	0	7177.26	23172.3	93809.1	54944.1	46240.3	52182	74184.2
Q9JM13	1	1	19.8	Rab5 GDP/GTP exchange factor OS=Mus musculus GN=Rabgef1 PE=1 SV=1	Rabgef1	0	0	0	0	0	0	0	0	0	0	0	0	525028	570304	644767	1.13588e+06	409252	662186	0	0	0	0	0	0
Q8K1R7	1	1	50.62	Serine/threonine-protein kinase Nek9 OS=Mus musculus GN=Nek9 PE=1 SV=2	Nek9	0	0	0	0	0	0	0	0	0	0	0	0	8540.09	3390.43	20133.5	10013.3	54623.8	3525.45	0	0	0	0	0	0
Q6PDS3	1	1	89.65	Sterile alpha and TIR motif-containing protein 1 OS=Mus musculus GN=Sarm1 PE=1 SV=1	Sarm1	0	0	0	0	0	0	0	0	0	0	0	0	292033	242367	194932	403881	170767	431701	316513	478445	424653	414831	623547	531502
Q8BYH3	1	1	15.38	tRNA:m(4)X modification enzyme TRM13 homolog OS=Mus musculus GN=Trmt13 PE=2 SV=1	Trmt13	0	0	0	0	0	0	0	0	0	0	0	0	1.43435e+06	1.52601e+06	4.44078e+06	9.97619e+06	586992	1.38235e+06	0	0	0	0	0	0
Q9ES00	1	1	50.53	Ubiquitin conjugation factor E4 B OS=Mus musculus GN=Ube4b PE=1 SV=3	Ube4b	0	0	0	0	0	0	0	0	0	0	0	0	1.40436e+06	1.63639e+06	965068	229387	2.18481e+06	1.92858e+06	809545	52870.8	33649.5	64382.8	232308	685666
Q9QXJ1	1	1	28.8	Amyloid beta A4 precursor protein-binding family B member 1 OS=Mus musculus GN=Apbb1 PE=1 SV=3	Apbb1	0	0	0	0	0	0	0	0	0	0	0	0	0	0	0	0	0	0	170787	670450	94312.7	139286	116245	144678
Q8BZM1	1	1	15.04	Glomulin OS=Mus musculus GN=Glmn PE=1 SV=1	Glmn	0	0	0	0	0	0	0	0	0	0	0	0	0	0	0	0	0	0	14419.2	18565.9	990.754	1398.66	8768.76	3561.59
Q6NZM9	1	1	24.69	Histone deacetylase 4 OS=Mus musculus GN=Hdac4 PE=1 SV=1	Hdac4	0	0	0	0	0	0	0	0	0	0	0	0	0	0	0	0	0	0	191919	291549	156120	277434	0	0
O08586	1	1	15.76	Phosphatidylinositol 3,4,5-trisphosphate 3-phosphatase and dual-specificity protein phosphatase PTEN OS=Mus musculus GN=Pten PE=1 SV=1	Pten	0	0	0	0	0	0	0	0	0	0	0	0	0	0	0	0	0	0	4.66115e+06	3.04983e+06	4.9935e+06	3.94106e+06	3.86438e+06	2.90431e+06
P63168	1	1	114.99	Dynein light chain 1, cytoplasmic OS=Mus musculus GN=Dynll1 PE=1 SV=1	Dynll1	617194	855667	617194	3.73691e+06	751343	1.05645e+06	2.02895e+06	2.70039e+06	55147.7	129600	2.25503e+06	3.04332e+06	822862	680376	645394	1.49225e+06	1.37444e+06	2.3404e+06	1.56892e+06	2.21451e+06	1.32375e+06	1.78351e+06	1.34836e+06	2.03912e+06
Q8C0C7	2	2	216.39	Phenylalanine--tRNA ligase alpha subunit OS=Mus musculus GN=Farsa PE=1 SV=1	Farsa	761029	1.03665e+06	761029	1.66237e+06	1.86795e+06	2.63938e+06	3.74783e+06	2.18028e+06	2.55152e+06	3.50582e+06	2.21173e+06	1.83803e+06	2.64819e+06	2.59863e+06	2.372e+06	2.34506e+06	2.43105e+06	2.09158e+06	4.03638e+06	7.02729e+06	5.83721e+06	5.82545e+06	9.44167e+06	1.10684e+07
Q61166	2	2	121.76	Microtubule-associated protein RP/EB family member 1 OS=Mus musculus GN=Mapre1 PE=1 SV=3	Mapre1	1.26075e+06	1.4853e+06	1.26075e+06	1.64725e+06	1.07367e+06	1.14053e+06	1.61561e+06	1.65863e+06	1.53311e+06	2.54297e+06	1.73682e+06	2.04547e+06	1.17303e+06	1.24668e+06	1.30058e+06	1.79645e+06	826063	1.78941e+06	1.36451e+06	2.98635e+06	1.73812e+06	1.77335e+06	2.52575e+06	3.05446e+06
Q9DCM0	2	2	110.12	Persulfide dioxygenase ETHE1, mitochondrial OS=Mus musculus GN=Ethe1 PE=1 SV=2	Ethe1	299011	537491	299011	527942	439876	490339	337179	462749	1.02317e+06	1.06281e+06	1.32508e+06	1.05259e+06	424505	353715	586706	1.44962e+06	333395	684240	1.44008e+06	1.38623e+06	1.10105e+06	1.11123e+06	2.41395e+06	2.09312e+06
Q9D0I9	2	2	75.87	Arginine--tRNA ligase, cytoplasmic OS=Mus musculus GN=Rars PE=1 SV=2	Rars	903778	1.66507e+06	903778	1.35294e+06	386547	402862	344243	659086	1.32261e+06	1.68758e+06	784338	1.10981e+06	396969	463039	589121	649897	439092	857957	798869	1.10883e+06	608604	471562	1.66698e+06	1.75709e+06
Q922B2	2	2	95.83	Aspartate--tRNA ligase, cytoplasmic OS=Mus musculus GN=Dars PE=1 SV=2	Dars	234928	403301	234928	518498	404591	345925	16190.1	344395	958616	1.50872e+06	548792	672914	404653	544291	585163	1.17325e+06	229033	454442	469348	795781	613461	552638	1.44011e+06	1.03141e+06
P62311	1	1	25.73	U6 snRNA-associated Sm-like protein LSm3 OS=Mus musculus GN=Lsm3 PE=1 SV=2	Lsm3	11903.1	14258.8	11903.1	543934	75133.7	21117.9	2593.91	3335.14	19292.7	20198.2	402600	9206.15	207558	396454	266790	390477	226555	357775	406450	747320	189215	264798	843660	752610
Q9D6Y7	1	1	25.12	Mitochondrial peptide methionine sulfoxide reductase OS=Mus musculus GN=Msra PE=1 SV=1	Msra	83360.7	64513	83360.7	822188	103890	245813	425375	310371	555620	865834	538263	493766	314568	363004	502112	772888	398178	718859	558751	1.06315e+06	151773	359784	1.67511e+06	1.45332e+06
P31230	1	1	78.64	Aminoacyl tRNA synthase complex-interacting multifunctional protein 1 OS=Mus musculus GN=Aimp1 PE=1 SV=2	Aimp1	1.0206e+06	1.24735e+06	1.0206e+06	1.35389e+06	253064	394971	2.69395e+06	1.96839e+06	2.39104e+06	4.06249e+06	1.60737e+06	1.72864e+06	730418	598559	593896	1.15384e+06	757530	1.21966e+06	1.36826e+06	1.81029e+06	632753	693286	1.85575e+06	1.91466e+06
Q9CWS0	7	7	531.19	N(G),N(G)-dimethylarginine dimethylaminohydrolase 1 OS=Mus musculus GN=Ddah1 PE=1 SV=3	Ddah1	1.152e+07	1.5363e+07	1.152e+07	1.86153e+07	2.78196e+06	2.06879e+07	1.29353e+07	9.55436e+06	1.21693e+07	1.79376e+07	1.55465e+07	2.05523e+07	1.70281e+07	2.00797e+07	1.84055e+07	8.31095e+06	1.13108e+07	1.84711e+07	2.36786e+07	3.35079e+07	3.11978e+07	2.77851e+07	5.13088e+07	5.63441e+07
Q8BVI4	7	7	527.13	Dihydropteridine reductase OS=Mus musculus GN=Qdpr PE=1 SV=2	Qdpr	5.03422e+06	6.67522e+06	5.03422e+06	5.26838e+06	2.72444e+06	3.96336e+06	9.57188e+06	9.08699e+06	2.81209e+06	3.52756e+06	5.66426e+06	6.30914e+06	5.6385e+06	6.348e+06	6.02403e+06	7.63476e+06	2.80709e+06	4.87596e+06	1.11527e+07	1.34326e+07	6.84562e+06	5.3111e+06	1.86519e+07	1.87806e+07
Q99LF4	8	8	529.31	tRNA-splicing ligase RtcB homolog OS=Mus musculus GN=Rtcb PE=1 SV=1	Rtcb	567688	799567	567688	1.87152e+06	620374	921621	1.23542e+06	1.04067e+06	1.19892e+06	2.04189e+06	1.52296e+06	1.59444e+06	1.47862e+06	1.9002e+06	1.40395e+06	1.4948e+06	772207	1.5368e+06	1.74588e+06	2.70943e+06	2.66856e+06	2.44781e+06	2.80728e+06	2.52388e+06
P47754	5	5	302.96	F-actin-capping protein subunit alpha-2 OS=Mus musculus GN=Capza2 PE=1 SV=3	Capza2	3.48915e+06	5.13563e+06	3.48915e+06	8.24739e+06	4.26992e+06	4.83337e+06	6.88372e+06	5.23944e+06	7.06742e+06	1.08519e+07	6.79853e+06	7.38681e+06	4.67223e+06	4.41887e+06	5.04852e+06	6.61697e+06	4.46807e+06	5.68747e+06	6.59482e+06	9.29723e+06	6.72006e+06	5.47176e+06	1.25257e+07	1.34144e+07
Q9WUA3	13	13	752.46	ATP-dependent 6-phosphofructokinase, platelet type OS=Mus musculus GN=Pfkp PE=1 SV=1	Pfkp	4.41528e+06	5.61621e+06	4.41528e+06	8.81296e+06	4.62992e+06	5.56931e+06	7.5177e+06	3.79946e+06	4.85671e+06	7.73958e+06	8.04861e+06	8.71705e+06	4.73279e+06	6.11537e+06	3.72691e+06	6.71746e+06	3.28588e+06	4.89197e+06	6.55277e+06	1.05663e+07	1.29345e+07	8.71371e+06	9.89344e+06	8.9354e+06
P38647	15	15	1369.29	Stress-70 protein, mitochondrial OS=Mus musculus GN=Hspa9 PE=1 SV=3	Hspa9	6.3241e+06	7.91142e+06	6.3241e+06	5.88251e+06	3.13929e+06	6.60782e+06	4.05168e+06	3.4918e+06	6.1803e+06	1.01652e+07	9.16502e+06	6.96698e+06	4.75441e+06	6.51318e+06	6.8291e+06	7.81629e+06	4.30007e+06	5.81745e+06	5.37632e+06	9.22704e+06	7.28069e+06	6.639e+06	1.43376e+07	1.62415e+07
P46460	29	29	2151.1	Vesicle-fusing ATPase OS=Mus musculus GN=Nsf PE=1 SV=2	Nsf	1.33921e+07	1.74781e+07	1.33921e+07	2.66409e+07	2.10859e+07	2.25545e+07	2.6664e+07	2.37063e+07	2.72991e+07	4.28655e+07	1.91291e+07	2.04907e+07	1.9084e+07	2.47042e+07	2.1316e+07	3.67986e+07	1.45312e+07	2.29521e+07	2.06038e+07	3.39458e+07	2.45985e+07	3.38458e+07	4.24926e+07	4.12619e+07
Q9JHU4	46	46	2528.16	Cytoplasmic dynein 1 heavy chain 1 OS=Mus musculus GN=Dync1h1 PE=1 SV=2	Dync1h1	2.51745e+06	3.52513e+06	2.51745e+06	6.85973e+06	6.12849e+06	9.0879e+06	8.82623e+06	5.78685e+06	1.15466e+07	1.69007e+07	6.76301e+06	8.18288e+06	1.12465e+07	1.17391e+07	8.23404e+06	6.15477e+06	6.42063e+06	9.80003e+06	7.41742e+06	1.13815e+07	1.74431e+07	1.47848e+07	1.68642e+07	2.25551e+07
P47857	22	22	1511.58	ATP-dependent 6-phosphofructokinase, muscle type OS=Mus musculus GN=Pfkm PE=1 SV=3	Pfkm	5.20826e+06	7.94357e+06	5.20826e+06	1.19427e+07	9.28883e+06	1.14846e+07	2.23006e+07	2.16458e+07	1.0792e+07	1.50953e+07	1.20308e+07	1.69726e+07	1.02538e+07	8.93206e+06	1.50031e+07	2.99656e+07	4.76513e+06	1.03812e+07	2.0206e+07	2.68834e+07	1.6517e+07	2.70993e+07	2.24154e+07	2.2815e+07
P16858	24	24	2576.7	Glyceraldehyde-3-phosphate dehydrogenase OS=Mus musculus GN=Gapdh PE=1 SV=2	Gapdh	1.74162e+08	2.81933e+08	1.74162e+08	5.50258e+08	5.74291e+08	7.43587e+08	5.62453e+08	7.06737e+08	4.19253e+08	6.79488e+08	5.6489e+08	7.75087e+08	8.5219e+08	9.83968e+08	4.72326e+08	2.18331e+08	3.22743e+08	4.71214e+08	1.1069e+09	1.30462e+09	1.0926e+09	9.72122e+08	8.686e+08	1.39701e+09
Q9DBF1	9	9	402.11	Alpha-aminoadipic semialdehyde dehydrogenase OS=Mus musculus GN=Aldh7a1 PE=1 SV=4	Aldh7a1	952282	1.26246e+06	952282	1.78114e+06	694515	995594	2.7854e+06	2.33108e+06	3.8903e+06	5.79249e+06	3.82625e+06	4.58487e+06	1.98682e+06	2.32383e+06	2.85804e+06	3.56675e+06	1.86951e+06	3.09318e+06	3.77414e+06	4.89604e+06	3.90869e+06	3.61832e+06	5.04274e+06	6.0679e+06
Q6PDL0	3	3	234.41	Cytoplasmic dynein 1 light intermediate chain 2 OS=Mus musculus GN=Dync1li2 PE=1 SV=2	Dync1li2	192939	189842	192939	1.06448e+06	485798	372352	580600	257184	1.54038e+06	1.94956e+06	1.20045e+06	610067	1.10038e+06	1.32005e+06	983988	1.6261e+06	890465	1.23104e+06	1.9841e+06	2.73001e+06	2.27586e+06	2.05108e+06	1.03451e+06	1.2797e+06
P62852	2	1	98.47	40S ribosomal protein S25 OS=Mus musculus GN=Rps25 PE=1 SV=1	Rps25	236423	222419	236423	888231	673447	478014	2.16207e+06	1.93061e+06	58887.3	34335.7	602451	955201	548749	479817	528591	1.34178e+06	346557	658732	400030	711674	709920	922133	958483	1.33446e+06
P85094	3	3	114.99	Isochorismatase domain-containing protein 2A OS=Mus musculus GN=Isoc2a PE=1 SV=1	Isoc2a	314910	450800	314910	1.74526e+06	219675	1.79441e+06	2.09472e+06	1.73101e+06	3.21756e+06	4.37938e+06	4.92172e+06	3.71953e+06	2.35372e+06	3.64455e+06	3.33837e+06	2.31145e+06	2.18668e+06	2.86653e+06	4.20339e+06	6.00745e+06	5.69728e+06	5.24086e+06	4.9675e+06	4.54788e+06
Q62167	3	3	204.81	ATP-dependent RNA helicase DDX3X OS=Mus musculus GN=Ddx3x PE=1 SV=3	Ddx3x	158953	265413	158953	917211	146539	216157	855518	613924	1.53352e+06	2.14438e+06	1.60031e+06	679533	842707	830253	1.06643e+06	689972	602479	762787	887439	1.12003e+06	2.02472e+06	1.64624e+06	1.01034e+06	671011
Q5SQX6	4	4	310.14	Cytoplasmic FMR1-interacting protein 2 OS=Mus musculus GN=Cyfip2 PE=1 SV=2	Cyfip2	1.00939e+06	1.17963e+06	1.00939e+06	1.47188e+06	1.10198e+06	1.39505e+06	2.05621e+06	1.76646e+06	756940	1.48122e+06	1.4071e+06	1.63766e+06	914335	1.27421e+06	1.10009e+06	2.24988e+06	596259	1.27298e+06	776154	1.65003e+06	1.4868e+06	1.52877e+06	1.90249e+06	2.71456e+06
Q8CGC7	5	5	273.95	Bifunctional glutamate/proline--tRNA ligase OS=Mus musculus GN=Eprs PE=1 SV=4	Eprs	512357	516449	512357	545227	217881	358754	618127	689850	1.18554e+06	1.90257e+06	681116	853386	1.09843e+06	1.01308e+06	1.03338e+06	1.26942e+06	826715	1.34756e+06	1.52036e+06	2.30948e+06	1.22624e+06	1.00437e+06	2.39102e+06	2.34649e+06
Q9CZ30	4	4	288.02	Obg-like ATPase 1 OS=Mus musculus GN=Ola1 PE=1 SV=1	Ola1	996097	1.56464e+06	996097	2.30866e+06	1.99328e+06	2.38287e+06	2.43001e+06	2.09204e+06	2.32538e+06	3.63463e+06	2.17505e+06	2.71951e+06	2.42461e+06	3.09272e+06	1.14174e+06	2.97476e+06	1.56213e+06	2.31331e+06	3.48176e+06	4.36751e+06	4.77841e+06	4.81181e+06	5.08223e+06	6.13278e+06
P25444	4	4	179.47	40S ribosomal protein S2 OS=Mus musculus GN=Rps2 PE=1 SV=3	Rps2	541159	811311	541159	344982	284577	283182	911076	681916	957953	1.62756e+06	1.10915e+06	1.42877e+06	1.04399e+06	563901	802844	1.71385e+06	821524	2.18958e+06	515365	1.02592e+06	297129	327480	1.29751e+06	1.62588e+06
Q9JLJ2	4	4	218.33	4-trimethylaminobutyraldehyde dehydrogenase OS=Mus musculus GN=Aldh9a1 PE=1 SV=1	Aldh9a1	547321	702403	547321	1.23805e+06	588244	922725	1.65448e+06	936814	1.10932e+06	1.93499e+06	1.95149e+06	2.37553e+06	1.17796e+06	1.56464e+06	1.56465e+06	2.44373e+06	991272	1.69465e+06	1.51519e+06	2.52599e+06	1.48307e+06	1.3843e+06	2.81147e+06	2.56011e+06
Q68FL6	2	2	109.35	Methionine--tRNA ligase, cytoplasmic OS=Mus musculus GN=Mars PE=1 SV=1	Mars	0	0	0	0	0	0	550301	204799	467266	821440	198628	204421	195284	188237	308059	260205	125451	188077	108082	147464	118571	116049	269466	317504
Q9CQW2	2	2	101.75	ADP-ribosylation factor-like protein 8B OS=Mus musculus GN=Arl8b PE=1 SV=1	Arl8b	0	0	0	0	0	0	656339	616091	1.25202e+06	1.53276e+06	475592	518819	595629	717948	791790	1.51179e+06	522835	875956	709132	1.1454e+06	674858	760412	1.33628e+06	1.69034e+06
Q6PB66	1	1	23.98	Leucine-rich PPR motif-containing protein, mitochondrial OS=Mus musculus GN=Lrpprc PE=1 SV=2	Lrpprc	0	0	0	0	0	0	0	22280.3	9508.26	10311.5	0	0	331693	372174	409017	734300	210588	296251	0	0	0	0	0	0
Q8BU30	1	1	55.95	Isoleucine--tRNA ligase, cytoplasmic OS=Mus musculus GN=Iars PE=1 SV=2	Iars	0	0	0	0	0	0	2739.72	4817.33	117175	128214	10546.5	26213.5	38629.4	21196.7	11663	143421	33883.3	81117.5	0	0	0	0	0	0
Q8C052	1	1	32.79	Microtubule-associated protein 1S OS=Mus musculus GN=Map1s PE=1 SV=2	Map1s	0	0	0	0	0	0	0	11161.3	150177	214344	179053	105765	115483	162679	107709	133914	95120	162200	132135	267159	56927.7	134066	267217	453336
Q9Z1J3	1	1	47.83	Cysteine desulfurase, mitochondrial OS=Mus musculus GN=Nfs1 PE=1 SV=3	Nfs1	0	0	0	0	0	0	1.07229e+06	1.58083e+06	937838	1.17312e+06	793707	858293	1.03238e+06	1.28716e+06	436095	770863	376116	725982	0	0	0	0	0	0
P47753	2	2	117.01	F-actin-capping protein subunit alpha-1 OS=Mus musculus GN=Capza1 PE=1 SV=4	Capza1	0	0	0	0	0	0	0	0	0	0	0	0	1.27573e+06	1.96008e+06	2.01211e+06	3.28468e+06	908879	1.73434e+06	1.49854e+06	3.06871e+06	1.61426e+06	2.21578e+06	2.80592e+06	3.30094e+06
P50096	1	1	45.88	Inosine-5'-monophosphate dehydrogenase 1 OS=Mus musculus GN=Impdh1 PE=1 SV=2	Impdh1	0	0	0	0	0	0	0	0	0	0	0	0	123330	120896	241646	107377	70360.6	135101	0	0	0	0	0	0
Q9Z1Z0	2	2	106.78	General vesicular transport factor p115 OS=Mus musculus GN=Uso1 PE=1 SV=2	Uso1	849.403	3220.5	849.403	202907	22739.9	56483	713367	1.13107e+06	38759.3	71339.8	200967	161610	558449	465816	488298	1.54754e+06	141098	331540	548215	1.06741e+06	609551	645938	573295	579342
Q9D8W5	2	2	104.44	26S proteasome non-ATPase regulatory subunit 12 OS=Mus musculus GN=Psmd12 PE=1 SV=4	Psmd12	35939.6	85118.7	35939.6	292251	135292	188220	175676	93364.6	526954	895107	190964	201321	357184	473661	583415	303444	392660	706570	416864	507713	1.014e+06	609800	868651	699912
Q9Z0H4	2	2	94.2	CUGBP Elav-like family member 2 OS=Mus musculus GN=Celf2 PE=1 SV=1	Celf2	11846.2	25226.3	11846.2	511394	30420.5	57015.5	0	0	0	0	0	0	179510	325542	232956	539559	248550	477289	198924	149679	1.45065e+06	776096	44347.4	99638
Q9CR09	2	2	61.28	Ubiquitin-fold modifier-conjugating enzyme 1 OS=Mus musculus GN=Ufc1 PE=1 SV=1	Ufc1	665.179	841.051	665.179	154741	7485.03	10092.7	400102	107172	158777	175985	754524	308576	130281	118019	113901	297480	141301	209246	176965	317349	372266	321728	166380	234142
P21279	2	2	83.37	Guanine nucleotide-binding protein G(q) subunit alpha OS=Mus musculus GN=Gnaq PE=1 SV=4	Gnaq	13462.2	27922.5	13462.2	118397	101494	14683.7	292338	129243	233143	376104	240290	356802	234844	496416	382904	322013	114453	265677	321973	508515	792266	654711	781777	499895
Q6P5F9	2	2	73.59	Exportin-1 OS=Mus musculus GN=Xpo1 PE=1 SV=1	Xpo1	30797.2	31461.7	30797.2	261176	50497.2	194243	123742	61888.1	48028.3	80033.1	33890.9	43389	118953	131508	184078	441429	44801.6	91600.5	298189	403716	328836	405008	165146	386177
Q9D967	2	2	93.02	Magnesium-dependent phosphatase 1 OS=Mus musculus GN=Mdp1 PE=1 SV=1	Mdp1	67024.1	96201.7	67024.1	331033	272561	140087	520642	577755	274684	459780	740149	604989	419826	689615	382118	319117	262833	498300	859341	987765	1.94048e+06	1.66487e+06	908883	571294
Q9CR26	1	1	42.93	Vacuolar protein sorting-associated protein VTA1 homolog OS=Mus musculus GN=Vta1 PE=1 SV=1	Vta1	4.81729e+06	7.16597e+06	4.81729e+06	6.0175e+06	3.66184e+06	5.88381e+06	1.09617e+07	9.38136e+06	8.69162e+06	1.11872e+07	6.67137e+06	8.68943e+06	5.31431e+06	6.44376e+06	4.6841e+06	6.01e+06	2.95573e+06	4.9049e+06	6.24641e+06	7.45766e+06	7.65078e+06	5.53294e+06	9.74449e+06	1.06119e+07
Q9D0J8	1	1	154.21	Parathymosin OS=Mus musculus GN=Ptms PE=1 SV=3	Ptms	2.61571e+06	2.98498e+06	2.61571e+06	312886	3.93416e+06	3.78159e+06	3.68927e+06	4.01038e+06	1.06017e+06	432232	2.51481e+06	701012	1.75529e+06	1.79719e+06	2.31258e+06	3.48418e+06	2.78572e+06	3.22691e+06	2.68672e+06	3.82126e+06	5.96174e+06	3.97837e+06	4.81269e+06	5.34534e+06
Q3THE2	1	1	51.29	Myosin regulatory light chain 12B OS=Mus musculus GN=Myl12b PE=1 SV=2	Myl12b	1.23547e+06	2.1267e+06	1.23547e+06	2.73225e+06	1.22564e+06	1.62399e+06	1.68851e+06	1.82033e+06	1.77533e+06	2.84692e+06	2.88292e+06	2.67879e+06	1.02917e+06	2.18546e+06	936809	749126	1.21782e+06	2.19998e+06	1.30446e+06	2.65885e+06	808024	1.62421e+06	2.04781e+06	2.30875e+06
P50114	1	1	136.56	Protein S100-B OS=Mus musculus GN=S100b PE=1 SV=2	S100b	2.34462e+06	3.12564e+06	2.34462e+06	1.66255e+07	4.02968e+06	4.71306e+06	4.37759e+06	3.79183e+06	7.66437e+06	1.12365e+07	1.108e+07	1.53497e+07	2.1811e+07	2.30639e+07	3.45443e+07	2.01691e+07	1.41039e+07	2.1138e+07	3.45947e+07	4.03473e+07	2.10299e+07	1.76649e+07	1.03043e+08	9.75418e+07
Q4VAA2	1	1	64.8	Protein CDV3 OS=Mus musculus GN=Cdv3 PE=1 SV=2	Cdv3	7.31773e+06	8.06768e+06	7.31773e+06	1.05897e+07	3.7159e+06	5.07614e+06	6.29166e+06	3.87275e+06	9.27275e+06	1.7077e+07	1.19196e+07	1.10216e+07	4.56616e+06	4.47402e+06	3.32721e+06	3.59893e+06	4.35564e+06	6.5053e+06	4.63435e+06	7.77769e+06	3.04322e+06	3.25717e+06	6.22766e+06	6.59398e+06
Q6IR34	2	2	116.76	G-protein-signaling modulator 1 OS=Mus musculus GN=Gpsm1 PE=1 SV=3	Gpsm1	116262	195461	116262	79773.3	106401	76856	353490	332244	210664	332529	107893	117512	240090	245866	205763	664042	156866	224481	0	0	0	0	0	0
Q3UJB9	2	2	64.92	Enhancer of mRNA-decapping protein 4 OS=Mus musculus GN=Edc4 PE=1 SV=2	Edc4	157468	134102	157468	405753	151957	97818.8	0	0	0	0	0	0	264632	408018	332245	748823	255379	477905	353624	224696	206536	233555	272576	300888
Q8K2H2	2	2	77.46	OTU domain-containing protein 6B OS=Mus musculus GN=Otud6b PE=1 SV=1	Otud6b	135707	169795	135707	90271.4	145267	114983	536145	612766	3858.14	3715.4	109760	62899.6	120583	212758	383533	828854	69067.3	125539	488535	315280	342140	473931	360530	444469
Q9Z130	2	1	86.02	Heterogeneous nuclear ribonucleoprotein D-like OS=Mus musculus GN=Hnrnpdl PE=1 SV=1	Hnrnpdl	327565	432717	327565	652568	110966	185964	324026	336156	440552	734166	565157	624276	252423	253974	186739	288728	334142	473099	501958	773903	700074	719991	1.48208e+06	1.71374e+06
Q8R0F8	2	2	47.18	Acylpyruvase FAHD1, mitochondrial OS=Mus musculus GN=Fahd1 PE=1 SV=2	Fahd1	1.01843e+06	1.16714e+06	1.01843e+06	1.25981e+06	645644	1.02688e+06	923104	1.05802e+06	717524	1.40063e+06	1.65454e+06	1.95634e+06	1.07678e+06	903724	1.80843e+06	2.83317e+06	452553	1.14379e+06	2.87116e+06	3.10975e+06	2.19606e+06	2.54927e+06	2.72013e+06	3.42882e+06
Q9CX86	2	2	142.25	Heterogeneous nuclear ribonucleoprotein A0 OS=Mus musculus GN=Hnrnpa0 PE=1 SV=1	Hnrnpa0	114976	217827	114976	1.13183e+06	235806	414517	18753.3	98766.1	71121.9	77623.5	832593	42531.6	632729	669097	739279	1.04597e+06	627342	882679	400161	342749	166360	215021	584439	275488
P15327	2	2	101.37	Bisphosphoglycerate mutase OS=Mus musculus GN=Bpgm PE=1 SV=2	Bpgm	153305	158166	153305	287178	133820	85852.2	380357	254898	243221	349474	477200	703252	0	0	0	0	0	0	66385.2	160571	155417	163116	115603	93440
Q9QZE7	2	2	76.05	Translin-associated protein X OS=Mus musculus GN=Tsnax PE=1 SV=1	Tsnax	34541.2	117768	34541.2	663590	413493	332685	1.44955e+06	1.24072e+06	832239	1.39983e+06	1.16778e+06	1.68832e+06	1.67264e+06	2.67255e+06	1.59958e+06	1.6745e+06	888423	1.42832e+06	861931	1.33454e+06	2.06721e+06	1.37991e+06	1.39042e+06	1.41889e+06
P08752	2	2	75.06	Guanine nucleotide-binding protein G(i) subunit alpha-2 OS=Mus musculus GN=Gnai2 PE=1 SV=5	Gnai2	85765.1	79565.9	85765.1	146185	152821	291655	617677	106376	351893	884581	623397	521663	407568	686120	737707	967027	1.14273e+06	631964	226727	13275.2	255182	219918	308025	390457
Q8CGK3	2	2	66.73	Lon protease homolog, mitochondrial OS=Mus musculus GN=Lonp1 PE=1 SV=2	Lonp1	55629.2	74177.7	55629.2	3435.89	59507.4	48919.7	772760	571694	2.24831e+06	3.45808e+06	2.43459e+06	2.1783e+06	2.06499e+06	2.28601e+06	964412	1.34723e+06	1.6851e+06	1.9353e+06	2.05342e+06	3.02125e+06	2.25597e+06	1.97186e+06	2.12427e+06	2.84172e+06
P58389	2	2	79.07	Serine/threonine-protein phosphatase 2A activator OS=Mus musculus GN=Ppp2r4 PE=1 SV=1	Ppp2r4	84604.7	172307	84604.7	1.44828e+06	47365.7	174706	278460	188933	1.35851e+06	1.9604e+06	932679	1.34173e+06	1.76411e+06	1.63026e+06	2.43986e+06	2.55364e+06	1.36915e+06	2.09473e+06	2.25073e+06	3.32688e+06	1.89554e+06	1.93776e+06	5.17336e+06	5.91932e+06
Q91Z67	2	2	128.36	SLIT-ROBO Rho GTPase-activating protein 2 OS=Mus musculus GN=Srgap2 PE=1 SV=2	Srgap2	110355	105315	110355	431941	26403.8	45067.6	0	0	0	0	0	0	145424	74305.2	143732	207310	193091	344486	0	0	0	0	0	0
Q9DBL7	2	2	142.24	Bifunctional coenzyme A synthase OS=Mus musculus GN=Coasy PE=1 SV=2	Coasy	123511	172221	123511	184479	159863	139377	385443	332996	169082	328532	108834	141148	385886	141010	833092	1.58692e+06	204461	445073	649697	763090	607651	1.09901e+06	611709	617593
Q6PAJ1	2	2	56.08	Breakpoint cluster region protein OS=Mus musculus GN=Bcr PE=1 SV=3	Bcr	1858.13	11865.4	1858.13	276496	121890	0	0	0	0	0	0	0	0	0	0	0	0	0	0	0	0	0	0	0
Q8CIE6	2	2	63.69	Coatomer subunit alpha OS=Mus musculus GN=Copa PE=1 SV=2	Copa	88847.4	123625	88847.4	338726	140709	57427.1	74000.2	120798	134200	117332	52155.7	125139	504466	758923	493424	814427	227408	366062	326533	643067	593122	601934	1.14915e+06	987858
P49312	1	1	123.8	Heterogeneous nuclear ribonucleoprotein A1 OS=Mus musculus GN=Hnrnpa1 PE=1 SV=2	Hnrnpa1	1.01244e+06	2.13029e+06	1.01244e+06	430393	455893	0	0	0	0	0	0	0	554331	596221	710870	1.01644e+06	621181	1.03577e+06	0	0	0	0	0	0
Q9QZD9	1	1	66.53	Eukaryotic translation initiation factor 3 subunit I OS=Mus musculus GN=Eif3i PE=1 SV=1	Eif3i	506394	739777	506394	0	26671.1	23495.5	0	0	0	0	0	0	108993	85241.8	190570	245177	62023.4	114149	0	0	0	0	0	0
Q8CBY8	1	1	46.4	Dynactin subunit 4 OS=Mus musculus GN=Dctn4 PE=1 SV=1	Dctn4	1.9822e+06	3.03245e+06	1.9822e+06	2.45418e+06	1.2141e+06	1.2026e+06	852643	1.03081e+06	2.16715e+06	2.7704e+06	845946	1.20875e+06	705932	897928	1.04865e+06	1.13677e+06	764601	1.44652e+06	1.27941e+06	1.80956e+06	1.3014e+06	1.15577e+06	2.95389e+06	3.37335e+06
Q9DCL8	1	1	112.94	Protein phosphatase inhibitor 2 OS=Mus musculus GN=Ppp1r2 PE=1 SV=3	Ppp1r2	611172	867741	611172	162884	1.16611e+06	1.02189e+06	0	0	0	0	0	0	631319	329052	498175	772571	858941	1.21349e+06	0	0	0	0	0	0
P10852	1	1	44.42	4F2 cell-surface antigen heavy chain OS=Mus musculus GN=Slc3a2 PE=1 SV=1	Slc3a2	1.29514e+06	1.82398e+06	1.29514e+06	125815	1.08643e+06	654080	2.02607e+06	2.16715e+06	1.4175e+06	2.25868e+06	1.58066e+06	1.87917e+06	1.46968e+06	2.3376e+06	1.96159e+06	2.67772e+06	1.11409e+06	1.86295e+06	1.99568e+06	2.17392e+06	2.23567e+06	2.2404e+06	3.23815e+06	4.10051e+06
Q9R0Q7	1	1	33.26	Prostaglandin E synthase 3 OS=Mus musculus GN=Ptges3 PE=1 SV=1	Ptges3	490761	678533	490761	1.83388e+06	570000	558398	1.35053e+06	1.2284e+06	470202	729055	1.13996e+06	1.47432e+06	671157	834898	946231	1.28486e+06	632719	1.22849e+06	1.40424e+06	2.24527e+06	998674	1.29695e+06	2.06325e+06	2.13472e+06
Q8BW96	1	1	86.84	Calcium/calmodulin-dependent protein kinase type 1D OS=Mus musculus GN=Camk1d PE=1 SV=2	Camk1d	457744	444374	457744	1.07515e+06	508801	533696	1.20526e+06	1.28048e+06	1.12507e+06	2.05994e+06	789363	876918	675108	563180	902305	1.78208e+06	531999	1.06662e+06	355303	576528	326595	448679	592793	698839
O55135	1	1	74.31	Eukaryotic translation initiation factor 6 OS=Mus musculus GN=Eif6 PE=1 SV=2	Eif6	509851	1.14395e+06	509851	892128	621255	760537	998960	1.10913e+06	2998.74	67.3068	701247	741424	532485	456697	1.00464e+06	1.48706e+06	303092	699324	2.37651e+06	3.11002e+06	2.19399e+06	2.97839e+06	4.29727e+06	3.58931e+06
Q9CXW3	1	1	44.08	Calcyclin-binding protein OS=Mus musculus GN=Cacybp PE=1 SV=1	Cacybp	918156	1.58103e+06	918156	62975.9	181456	52316.5	0	0	0	0	0	0	0	0	0	0	0	0	0	0	0	0	0	0
Q8BTG7	1	1	42.43	Protein NDRG4 OS=Mus musculus GN=Ndrg4 PE=1 SV=1	Ndrg4	1.23361e+06	1.58519e+06	1.23361e+06	207913	585974	724560	0	0	0	0	0	0	111750	109831	72487.6	86073.4	36566.9	96955.5	0	0	0	0	0	0
Q8R0P4	1	1	102.11	Mth938 domain-containing protein OS=Mus musculus GN=Aamdc PE=1 SV=1	Aamdc	2.05386e+06	3.42618e+06	2.05386e+06	2.84213e+06	2.08777e+06	2.29587e+06	481972	766561	1.06377e+06	1.94673e+06	1.42772e+06	1.71905e+06	915543	1.65324e+06	1.01888e+06	1.00994e+06	669629	1.3924e+06	1.85924e+06	3.36529e+06	1.86897e+06	2.09548e+06	4.11886e+06	5.08652e+06
F8VQB6	1	1	37.03	Unconventional myosin-X OS=Mus musculus GN=Myo10 PE=1 SV=1	Myo10	315735	411076	315735	161.927	109789	198988	0	0	0	0	0	0	0	0	0	0	0	0	0	0	0	0	0	0
P14148	1	1	76.4	60S ribosomal protein L7 OS=Mus musculus GN=Rpl7 PE=1 SV=2	Rpl7	283840	415286	283840	836629	379604	297866	254032	49662.9	61561.8	69212.5	135411	174983	288349	336905	493955	453001	270247	407907	314346	261152	309923	259620	558614	332957
Q9CWM4	1	1	71.32	Prefoldin subunit 1 OS=Mus musculus GN=Pfdn1 PE=1 SV=1	Pfdn1	541355	619178	541355	1.82625e+06	1.03053e+06	963126	2.03883e+06	1.92933e+06	832949	775994	920559	973559	1.43312e+06	1.49709e+06	1.35564e+06	3.59739e+06	1.21798e+06	2.41819e+06	1.75772e+06	3.10109e+06	2.06059e+06	3.01736e+06	2.50591e+06	2.97597e+06
Q62093	1	1	80.75	Serine/arginine-rich splicing factor 2 OS=Mus musculus GN=Srsf2 PE=1 SV=4	Srsf2	869539	891135	869539	0	300348	242705	257231	308771	0	0	968.526	1406.37	0	0	0	0	0	0	0	0	0	0	0	0
Q62426	1	1	132.61	Cystatin-B OS=Mus musculus GN=Cstb PE=1 SV=1	Cstb	1.31281e+06	1.21417e+06	1.31281e+06	0	70099.3	25809.7	1.05929e+06	1.68277e+06	2.94546e+06	4.00724e+06	2.02861e+06	2.11369e+06	933375	531551	1.5978e+06	1.97514e+06	618139	1.10999e+06	1.73553e+06	2.38886e+06	1.10558e+06	1.35941e+06	4.30934e+06	3.39571e+06
Q9QZ23	1	1	33.37	NFU1 iron-sulfur cluster scaffold homolog, mitochondrial OS=Mus musculus GN=Nfu1 PE=1 SV=2	Nfu1	1.01917e+06	1.78835e+06	1.01917e+06	993946	751378	937511	890246	1.10842e+06	1.14893e+06	1.97303e+06	1.57401e+06	1.64635e+06	485063	997978	501676	974005	541286	1.03232e+06	0	0	0	0	0	0
Q8K274	1	1	146.84	Ketosamine-3-kinase OS=Mus musculus GN=Fn3krp PE=1 SV=2	Fn3krp	198964	228454	198964	873059	333448	399689	965072	1.10135e+06	1491.28	6145.64	225454	219665	362757	384616	628421	1.02368e+06	260531	369947	2.07873e+06	2.36666e+06	2.81961e+06	2.3291e+06	3.37756e+06	2.93891e+06
Q80XI4	1	1	71.22	Phosphatidylinositol 5-phosphate 4-kinase type-2 beta OS=Mus musculus GN=Pip4k2b PE=1 SV=1	Pip4k2b	1.38251e+06	1.70366e+06	1.38251e+06	1.91636e+06	1.31059e+06	1.4307e+06	1.84585e+06	1.54241e+06	149172	238636	1.24038e+06	1.30079e+06	268743	486570	612559	605297	647070	856363	1.00667e+06	1.1126e+06	1.13474e+06	956356	1.12003e+06	1.46411e+06
Q9WTS6	1	1	21.24	Teneurin-3 OS=Mus musculus GN=Tenm3 PE=1 SV=1	Tenm3	1.39892e+06	2.18544e+06	1.39892e+06	14200.1	41911	34591	5128.27	8947.41	926.44	489.732	2.15328e+06	1.90369e+06	351686	476581	48414.2	539.495	654980	450542	688418	777787	4.11775e+06	144047	82260.9	7450.53
P62862	1	1	64.72	40S ribosomal protein S30 OS=Mus musculus GN=Fau PE=1 SV=1	Fau	576994	1.13521e+06	576994	1.04942e+06	544508	678746	560381	1.42324e+06	903302	1.65542e+06	1.01351e+06	1.22562e+06	585052	1.29511e+06	606872	880192	428049	662434	674633	1.30559e+06	163780	581046	1.13405e+06	1.41283e+06
Q8BKC5	1	1	84.47	Importin-5 OS=Mus musculus GN=Ipo5 PE=1 SV=3	Ipo5	2.6292e+06	2.57345e+06	2.6292e+06	49018.9	267143	29605.6	310696	436588	944648	1.30967e+06	758750	1.29166e+06	270306	314619	281611	358097	227065	370201	484426	991097	388891	381950	899658	909434
Q9CXY6	1	1	123.45	Interleukin enhancer-binding factor 2 OS=Mus musculus GN=Ilf2 PE=1 SV=1	Ilf2	375229	958009	375229	1.30329e+06	691336	781092	1.5913e+06	3.40146e+06	1.8361e+06	3.10828e+06	1.58351e+06	2.33125e+06	798881	388763	689667	1.73451e+06	741898	1.3409e+06	652853	796558	325629	833017	795106	1.16066e+06
Q9D1R9	1	1	87.55	60S ribosomal protein L34 OS=Mus musculus GN=Rpl34 PE=1 SV=2	Rpl34	787914	918256	787914	2.33367e+06	1.42583e+06	1.31546e+06	2.86459e+06	2.61635e+06	1.17527e+06	2.60641e+06	1.19685e+06	1.73279e+06	1.51657e+06	1.23889e+06	1.36432e+06	2.96764e+06	799982	1.82206e+06	863967	2.09528e+06	2.01048e+06	2.59402e+06	3.60015e+06	4.10028e+06
A2AG50	2	2	96.2	MAP7 domain-containing protein 2 OS=Mus musculus GN=Map7d2 PE=1 SV=1	Map7d2	453443	525602	453443	1.24288e+06	976144	943270	1.97335e+06	2.13818e+06	1.11341e+06	2.28044e+06	595737	960113	1.20127e+06	1.17407e+06	1.53368e+06	2.62574e+06	655433	1.20658e+06	2.02671e+06	3.088e+06	2.15117e+06	2.51115e+06	2.26196e+06	2.80171e+06
Q505F5	2	2	133.56	Leucine-rich repeat-containing protein 47 OS=Mus musculus GN=Lrrc47 PE=1 SV=1	Lrrc47	1.04336e+06	1.29848e+06	1.04336e+06	856773	825902	1.02711e+06	633571	730869	215414	362382	435191	605754	778533	1.01164e+06	1.11099e+06	2.21063e+06	795082	1.26105e+06	475254	518713	401958	477495	1.09779e+06	886573
O35737	2	2	128.13	Heterogeneous nuclear ribonucleoprotein H OS=Mus musculus GN=Hnrnph1 PE=1 SV=3	Hnrnph1	430400	530403	430400	1.12764e+06	196283	308450	323302	232957	589763	775914	776694	657325	472114	340839	284129	489464	507776	983789	611724	1.22274e+06	797259	1.06348e+06	1.36438e+06	1.34334e+06
P62717	2	2	107.97	60S ribosomal protein L18a OS=Mus musculus GN=Rpl18a PE=1 SV=1	Rpl18a	439498	565167	439498	665945	311529	399152	529740	743542	342458	639009	517757	829129	646436	483953	557555	867293	402599	909316	1.51389e+06	2.1438e+06	1.60414e+06	2.22542e+06	1.75118e+06	1.85212e+06
Q6P069	2	2	188.85	Sorcin OS=Mus musculus GN=Sri PE=1 SV=1	Sri	1.45343e+06	1.65791e+06	1.45343e+06	1.81421e+06	346672	376243	218160	367520	980798	1.52151e+06	612347	913681	530817	504198	590765	709497	616587	1.24473e+06	252683	1.28167e+06	388554	499841	1.08403e+06	1.22204e+06
P51855	2	2	103.53	Glutathione synthetase OS=Mus musculus GN=Gss PE=1 SV=1	Gss	2.16353e+06	2.65146e+06	2.16353e+06	1.94601e+06	2.12714e+06	2.1591e+06	311363	261008	2.64107e+06	2.9262e+06	1.89451e+06	2.1981e+06	2.2318e+06	2.65814e+06	1.78833e+06	1.41806e+06	1.29691e+06	2.21199e+06	2.64778e+06	4.0724e+06	3.25424e+06	2.96787e+06	5.62847e+06	4.99474e+06
P63254	2	2	94.11	Cysteine-rich protein 1 OS=Mus musculus GN=Crip1 PE=1 SV=2	Crip1	1.61202e+06	1.91299e+06	1.61202e+06	4.33141e+06	3.7454e+06	4.10264e+06	2.29976e+06	2.32672e+06	30236.5	42463.7	2.48418e+06	1.03992e+06	4.04265e+06	3.40396e+06	2.93012e+06	103590	6.56295e+06	6.40179e+06	5.41906e+06	3.03456e+06	3.61063e+06	2.43406e+06	6.29567e+06	7.05509e+06
Q9JHI5	2	2	61.44	Isovaleryl-CoA dehydrogenase, mitochondrial OS=Mus musculus GN=Ivd PE=1 SV=1	Ivd	129640	197302	129640	458027	316083	280647	635368	263476	228226	292669	606127	724291	298384	308843	481697	858547	161333	405512	236664	571319	136933	231275	446900	537188
Q8R016	2	2	68.91	Bleomycin hydrolase OS=Mus musculus GN=Blmh PE=1 SV=1	Blmh	1.13438e+06	1.35123e+06	1.13438e+06	2.66349e+06	2.26063e+06	2.93152e+06	3.74494e+06	3.04553e+06	3.94441e+06	6.09622e+06	3.32328e+06	4.25147e+06	8.80235e+06	8.53549e+06	1.05732e+07	9.96449e+06	6.33453e+06	7.34862e+06	8.35309e+06	1.14819e+07	8.99028e+06	6.72958e+06	1.18525e+07	1.40985e+07
Q07076	2	2	135.31	Annexin A7 OS=Mus musculus GN=Anxa7 PE=1 SV=2	Anxa7	730676	1.25948e+06	730676	1.50121e+06	968609	1.2166e+06	1.00277e+06	903415	2.19879e+06	2.99336e+06	2.21274e+06	2.321e+06	1.04356e+06	1.07647e+06	1.81039e+06	1.44842e+06	1.1027e+06	1.65893e+06	2.01433e+06	2.64283e+06	1.17249e+06	1.34567e+06	3.40665e+06	3.72978e+06
Q9JM76	2	2	99.91	Actin-related protein 2/3 complex subunit 3 OS=Mus musculus GN=Arpc3 PE=1 SV=3	Arpc3	469101	650948	469101	1.0216e+06	1.92041e+06	2.03689e+06	1.85924e+06	2.02297e+06	1.81109e+06	3.2997e+06	1.39098e+06	1.8627e+06	1.59878e+06	1.73045e+06	2.25939e+06	4.0583e+06	1.1162e+06	1.92385e+06	3.07684e+06	3.98924e+06	1.3402e+06	1.51921e+06	3.86998e+06	4.94154e+06
P29758	2	2	166.69	Ornithine aminotransferase, mitochondrial OS=Mus musculus GN=Oat PE=1 SV=1	Oat	197434	150226	197434	904638	412250	580513	965212	818558	6449.08	10847	1.07507e+06	46844.7	530888	362547	1.26137e+06	2.57584e+06	391089	665772	1.44295e+06	1.53024e+06	1.78801e+06	1.48252e+06	3.45004e+06	3.5468e+06
Q91VM9	2	2	130.78	Inorganic pyrophosphatase 2, mitochondrial OS=Mus musculus GN=Ppa2 PE=1 SV=1	Ppa2	607720	779138	607720	713017	557030	487212	1.72553e+06	1.44745e+06	931295	1.1876e+06	2.70588e+06	1.62225e+06	757567	530146	1.05142e+06	2.14166e+06	537864	1.01946e+06	951543	1.48474e+06	1.06383e+06	1.41053e+06	2.03474e+06	2.11241e+06
Q921F4	2	2	154.49	Heterogeneous nuclear ribonucleoprotein L-like OS=Mus musculus GN=Hnrnpll PE=1 SV=3	Hnrnpll	310404	385852	310404	1.18393e+06	479087	674739	392999	465669	426244	822673	161168	189787	259126	158732	377692	518331	242922	407833	0	0	0	0	0	0
Q9CQH7	2	2	113.4	Transcription factor BTF3 homolog 4 OS=Mus musculus GN=Btf3l4 PE=1 SV=1	Btf3l4	1.03106e+06	1.61173e+06	1.03106e+06	3.15375e+06	2.36649e+06	3.56586e+06	3.65654e+06	3.91978e+06	3.1538e+06	4.74172e+06	3.15244e+06	3.80765e+06	4.03952e+06	4.60797e+06	4.36615e+06	1.77986e+06	1.8338e+06	3.64562e+06	6.2649e+06	8.09554e+06	5.36529e+06	6.02433e+06	9.23975e+06	7.38191e+06
Q9QYB8	2	2	94.99	Beta-adducin OS=Mus musculus GN=Add2 PE=1 SV=4	Add2	1.59206e+06	2.06777e+06	1.59206e+06	2.81347e+06	1.66737e+06	3.08557e+06	42382.2	38322	356955	431342	134167	12751.2	2.32355e+06	2.42766e+06	2.33416e+06	3.38505e+06	1.30341e+06	2.72094e+06	1.39561e+06	2.69881e+06	2.79035e+06	2.17876e+06	2.67563e+06	3.83082e+06
Q920E5	2	2	168.06	Farnesyl pyrophosphate synthase OS=Mus musculus GN=Fdps PE=1 SV=1	Fdps	453692	615453	453692	1.08937e+06	762545	965279	2.11074e+06	2.72874e+06	1.27433e+06	1.97973e+06	1.06937e+06	1.33149e+06	659131	376904	1.24743e+06	1.87985e+06	682859	1.17621e+06	1.41506e+06	1.7581e+06	1.18765e+06	1.72366e+06	2.23946e+06	1.98556e+06
O35326	2	2	96.94	Serine/arginine-rich splicing factor 5 OS=Mus musculus GN=Srsf5 PE=1 SV=2	Srsf5	408669	666008	408669	636436	400998	390067	548103	559289	324337	490536	389496	598733	451529	424270	594682	957592	474914	705972	564092	1.04096e+06	981434	707601	1.78431e+06	2.16045e+06
P57746	2	2	272.44	V-type proton ATPase subunit D OS=Mus musculus GN=Atp6v1d PE=1 SV=1	Atp6v1d	494736	739738	494736	1.70473e+06	929989	1.00265e+06	1.35501e+06	2.01838e+06	11518.4	16890	362247	1.25211e+06	1.14386e+06	922402	2.21973e+06	3.00166e+06	748145	1.9114e+06	2.31228e+06	2.78006e+06	1.94975e+06	2.42265e+06	3.90119e+06	4.45599e+06
Q62048	2	2	240.89	Astrocytic phosphoprotein PEA-15 OS=Mus musculus GN=Pea15 PE=1 SV=1	Pea15	1.30005e+06	1.81114e+06	1.30005e+06	3.18878e+06	2.2991e+06	2.68974e+06	1.56525e+06	1.25185e+06	1.87255e+06	2.76442e+06	2.95237e+06	3.45992e+06	2.87805e+06	2.97394e+06	3.71549e+06	4.11446e+06	2.54514e+06	3.59858e+06	2.89513e+06	3.76688e+06	4.13379e+06	2.89314e+06	5.10491e+06	5.15452e+06
Q8VCT3	2	2	181.87	Aminopeptidase B OS=Mus musculus GN=Rnpep PE=1 SV=2	Rnpep	875720	1.00031e+06	875720	3.72211e+06	597784	659015	1.34719e+06	1.40747e+06	52159.2	43661.5	1.40065e+06	603870	787728	718512	861302	371388	2.15165e+06	2.05176e+06	1.23296e+06	1.15243e+06	1.74039e+06	1.17078e+06	1.80687e+06	1.85009e+06
P26645	2	2	105.49	Myristoylated alanine-rich C-kinase substrate OS=Mus musculus GN=Marcks PE=1 SV=2	Marcks	120642	237494	120642	21013.1	145618	115777	35417.3	1618.52	0	0	32627.4	44331.9	0	0	0	0	0	0	0	0	0	0	0	0
O88569	2	2	91.51	Heterogeneous nuclear ribonucleoproteins A2/B1 OS=Mus musculus GN=Hnrnpa2b1 PE=1 SV=2	Hnrnpa2b1	1.11374e+06	1.57545e+06	1.11374e+06	1.31353e+06	692498	1.15546e+06	667185	580317	1.50897e+06	3.28958e+06	1.03128e+06	1.10176e+06	1.50419e+06	2.62604e+06	2.6816e+06	1.2954e+06	1.71376e+06	2.96391e+06	4.2811e+06	5.82984e+06	4.65605e+06	5.03036e+06	9.6534e+06	1.17177e+07
O88456	2	2	118.06	Calpain small subunit 1 OS=Mus musculus GN=Capns1 PE=1 SV=1	Capns1	1.11225e+06	1.29452e+06	1.11225e+06	1.62011e+06	705857	772653	69569.4	205346	55260.1	127609	2.95206e+06	1.79454e+06	1.23134e+06	1.51632e+06	1.08547e+06	1.30418e+06	1.29125e+06	1.80621e+06	1.61587e+06	1.93152e+06	1.96622e+06	1.8596e+06	2.02551e+06	1.79927e+06
Q8R317	2	2	86.79	Ubiquilin-1 OS=Mus musculus GN=Ubqln1 PE=1 SV=1	Ubqln1	1.48086e+06	1.88609e+06	1.48086e+06	1.22193e+06	1.50559e+06	939883	154480	226260	6.64486e+06	9.83082e+06	221751	483744	2.07479e+06	3.11664e+06	2.38658e+06	3.84585e+06	2.10232e+06	3.00826e+06	2.01271e+06	4.05488e+06	2.45964e+06	2.88733e+06	5.21406e+06	5.77138e+06
Q640L5	2	2	60.13	Coiled-coil domain-containing protein 18 OS=Mus musculus GN=Ccdc18 PE=1 SV=1	Ccdc18	1.04502e+06	1.0717e+06	1.04502e+06	24689.2	549762	17608.5	0	0	0	0	0	0	0	0	0	0	0	0	0	0	0	0	0	0
Q9JHK4	2	2	101.56	Geranylgeranyl transferase type-2 subunit alpha OS=Mus musculus GN=Rabggta PE=1 SV=1	Rabggta	1.10593e+06	1.61838e+06	1.10593e+06	3.68378e+06	1.63099e+06	1.62286e+06	2.3254e+06	2.40373e+06	2.30341e+06	3.45271e+06	3.08348e+06	3.56669e+06	1.37486e+06	984789	1.23212e+06	2.22047e+06	897806	1.70737e+06	1.713e+06	3.0432e+06	2.15064e+06	2.44757e+06	3.3828e+06	4.30722e+06
Q8CCT4	2	2	64.96	Transcription elongation factor A protein-like 5 OS=Mus musculus GN=Tceal5 PE=1 SV=1	Tceal5	426138	177165	426138	192934	117544	173035	290027	337229	202105	297095	427980	409310	786811	590841	584552	738480	570141	697086	1.08034e+06	1.70644e+06	709755	949120	1.39099e+06	1.57881e+06
Q64520	2	2	146.1	Guanylate kinase OS=Mus musculus GN=Guk1 PE=1 SV=2	Guk1	730621	969174	730621	1.08544e+06	1.45275e+06	2.04987e+06	783658	795340	690400	811692	1.03873e+06	1.09976e+06	2.19718e+06	2.57141e+06	1.93324e+06	1.19313e+06	842240	2.52125e+06	2.34419e+06	4.18382e+06	3.87611e+06	2.88722e+06	3.28311e+06	3.85433e+06
Q99KQ4	2	2	111.65	Nicotinamide phosphoribosyltransferase OS=Mus musculus GN=Nampt PE=1 SV=1	Nampt	466294	689990	466294	657815	258859	354309	49467.8	12875.2	212855	392624	59294.6	192425	583516	737727	399930	448304	424588	726778	506234	841279	541804	463598	803069	1.67694e+06
P10711	2	2	135	Transcription elongation factor A protein 1 OS=Mus musculus GN=Tcea1 PE=1 SV=2	Tcea1	229491	341268	229491	592104	363751	457711	1.0729e+06	754624	717802	1.14309e+06	800451	713981	866983	1.01274e+06	1.91109e+06	2.0484e+06	622658	849724	424421	714719	613735	638949	1.90216e+06	2.15316e+06
Q3UVL4	2	2	135.53	Vacuolar protein sorting-associated protein 51 homolog OS=Mus musculus GN=Vps51 PE=1 SV=2	Vps51	373486	474437	373486	336894	177305	305800	15301.9	23662.2	990958	1.1851e+06	263405	13499.8	276605	237314	299332	285718	184381	348104	753002	1.01735e+06	565946	367068	995665	883368
Q9QYJ0	2	2	113.49	DnaJ homolog subfamily A member 2 OS=Mus musculus GN=Dnaja2 PE=1 SV=1	Dnaja2	189565	338558	189565	539919	596176	241965	1.41512e+06	1.43956e+06	1.27469e+06	1.6577e+06	1.15106e+06	2.31085e+06	1.61029e+06	2.08636e+06	1.17465e+06	324779	1.13016e+06	1.32462e+06	1.5248e+06	2.51167e+06	4.14616e+06	3.39595e+06	1.47563e+06	243675
P10605	2	2	97.15	Cathepsin B OS=Mus musculus GN=Ctsb PE=1 SV=2	Ctsb	317159	291022	317159	1.18202e+06	619741	250273	737152	719511	929955	1.45123e+06	1.99808e+06	1.20454e+06	1.03416e+06	817288	1.56524e+06	3.3206e+06	1.211e+06	2.41577e+06	1.68078e+06	2.34762e+06	1.44255e+06	2.18855e+06	1.6172e+06	1.50204e+06
Q9Z1Z2	2	2	79.19	Serine-threonine kinase receptor-associated protein OS=Mus musculus GN=Strap PE=1 SV=2	Strap	648269	710048	648269	142138	291325	729817	76850.5	60063.2	497903	762986	714746	272038	885790	1.23819e+06	1.07025e+06	1.03685e+06	1.0906e+06	1.50229e+06	4.15432e+06	6.39881e+06	4.23114e+06	4.0157e+06	1.05522e+07	1.17796e+07
Q6ZWX6	2	2	58.16	Eukaryotic translation initiation factor 2 subunit 1 OS=Mus musculus GN=Eif2s1 PE=1 SV=3	Eif2s1	361255	429223	361255	1.42338e+06	954352	1.26437e+06	2.56034e+06	1.29944e+06	1.75046e+06	3.13862e+06	2.28566e+06	2.09783e+06	980787	935859	868581	1.04145e+06	625809	1.02695e+06	2.59757e+06	4.62558e+06	2.92556e+06	2.5689e+06	4.46963e+06	5.08103e+06
Q99J77	2	2	99.12	Sialic acid synthase OS=Mus musculus GN=Nans PE=1 SV=1	Nans	283225	426394	283225	860193	748750	691268	114289	437935	560929	912016	689103	782497	977718	1.13726e+06	979645	1.35121e+06	519705	914546	962331	1.52245e+06	795373	765873	2.52112e+06	2.56107e+06
O88447	2	2	59.32	Kinesin light chain 1 OS=Mus musculus GN=Klc1 PE=1 SV=3	Klc1	553542	840659	553542	561477	298943	754300	31065	18676.8	76497.7	80385.2	204051	178190	348988	373960	357226	737294	350973	525576	414478	515338	111924	117681	195247	200566
Q8R0S2	2	2	111.36	IQ motif and SEC7 domain-containing protein 1 OS=Mus musculus GN=Iqsec1 PE=1 SV=2	Iqsec1	582620	650412	582620	332436	46520.5	97294.9	737435	510420	576489	821792	198101	223719	502889	711025	536070	1.12412e+06	397947	584228	325308	627514	689411	695049	784901	1.02595e+06
P08414	2	2	131.34	Calcium/calmodulin-dependent protein kinase type IV OS=Mus musculus GN=Camk4 PE=1 SV=2	Camk4	215968	323755	215968	1.81932e+06	186388	307361	123415	394434	1.23421e+06	1.75072e+06	711182	1.2731e+06	892599	1.48962e+06	1.20837e+06	1.46692e+06	1.30338e+06	1.7315e+06	1.29493e+06	1.63077e+06	592147	749604	1.94362e+06	2.0555e+06
Q3B7Z2	2	2	120.77	Oxysterol-binding protein 1 OS=Mus musculus GN=Osbp PE=1 SV=3	Osbp	282838	315824	282838	894057	746204	843442	3.47647e+06	3.52061e+06	2.27821e+06	4.42731e+06	1.42571e+06	1.88944e+06	1.2525e+06	1.09415e+06	1.39981e+06	3.41358e+06	475037	1.08102e+06	2.23125e+06	2.89847e+06	2.97471e+06	3.36694e+06	3.99983e+06	4.65721e+06
Q03958	2	2	82.55	Prefoldin subunit 6 OS=Mus musculus GN=Pfdn6 PE=1 SV=1	Pfdn6	244145	310251	244145	466063	3327.38	462529	1.44993e+06	827879	803963	1.68806e+06	984540	1.34101e+06	1.27933e+06	2.0434e+06	2.66844e+06	5.41406e+06	892767	1.63063e+06	1.85148e+06	3.0592e+06	2.91996e+06	3.16368e+06	5.67504e+06	5.14136e+06
Q64674	2	2	93.16	Spermidine synthase OS=Mus musculus GN=Srm PE=1 SV=1	Srm	143539	184997	143539	269689	114506	106169	228104	176981	160987	240263	286492	339406	394047	463255	546860	659856	385458	597401	1.17575e+06	1.80698e+06	800667	753038	1.30839e+06	1.40442e+06
Q5SUR0	2	2	147.61	Phosphoribosylformylglycinamidine synthase OS=Mus musculus GN=Pfas PE=1 SV=1	Pfas	349596	564317	349596	1.50104e+06	551010	608665	1.03379e+06	1.18545e+06	1.61399e+06	2.17155e+06	2.33803e+06	2.2074e+06	3.51162e+06	3.41991e+06	4.10897e+06	2.73655e+06	2.40158e+06	3.45686e+06	4.93352e+06	6.65057e+06	6.41846e+06	5.67071e+06	8.64316e+06	5.9306e+06
Q3UHD6	2	2	81.38	Sorting nexin-27 OS=Mus musculus GN=Snx27 PE=1 SV=2	Snx27	620639	854215	620639	1.22902e+06	1.36331e+06	1.87807e+06	794165	527707	36863.9	150053	118327	99203	596350	662813	583608	1.16231e+06	331372	585222	388173	807521	1.04287e+06	619967	2.79584e+06	2.82637e+06
Q8BHZ0	2	2	94.3	Protein FAM49A OS=Mus musculus GN=Fam49a PE=1 SV=1	Fam49a	379066	514428	379066	1.26572e+06	808393	1.33045e+06	809757	1.06962e+06	1.41805e+06	2.06238e+06	727392	829251	1.4899e+06	1.66256e+06	1.90975e+06	1.77848e+06	994707	1.4897e+06	2.16429e+06	2.95179e+06	1.97195e+06	1.15769e+06	3.24055e+06	3.23221e+06
O35927	1	1	41.67	Catenin delta-2 OS=Mus musculus GN=Ctnnd2 PE=1 SV=1	Ctnnd2	57934.3	105501	57934.3	0	7727.3	1475.19	0	0	0	0	0	0	0	0	0	0	0	0	0	0	0	0	0	0
P19246	1	1	34.62	Neurofilament heavy polypeptide OS=Mus musculus GN=Nefh PE=1 SV=3	Nefh	6907	9870.92	6907	49338	303909	297218	27500.5	61448.6	259171	432023	11100	16892.2	309791	398346	140871	319170	25785.8	66579.9	77253.2	306609	138815	505172	442780	320399
Q62241	1	1	21.24	U1 small nuclear ribonucleoprotein C OS=Mus musculus GN=Snrpc PE=1 SV=1	Snrpc	356346	374934	356346	344232	77570.9	81940.9	10321.2	10737.8	683638	1.15614e+06	9106.4	42236.8	288310	153672	196464	236120	481267	802590	191895	524639	141525	224787	570569	624288
P54923	1	1	31.28	[Protein ADP-ribosylarginine] hydrolase OS=Mus musculus GN=Adprh PE=1 SV=1	Adprh	12214.5	7502.46	12214.5	94667.4	29820.9	76768.7	1.57682e+06	941011	653472	1.18394e+06	762571	852533	0	0	0	0	0	0	0	0	0	0	0	0
Q9WVL0	1	1	47.9	Maleylacetoacetate isomerase OS=Mus musculus GN=Gstz1 PE=1 SV=1	Gstz1	88704.1	115476	88704.1	541279	129871	47545.9	371205	377257	259016	323963	451608	715586	355675	556868	344631	253572	316112	503539	750961	1.32472e+06	1.76198e+06	985644	1.23327e+06	148364
P70414	1	1	47.38	Sodium/calcium exchanger 1 OS=Mus musculus GN=Slc8a1 PE=1 SV=1	Slc8a1	45588.3	78347.5	45588.3	18142.2	98899.3	373467	0	0	0	0	0	0	0	0	0	0	0	0	0	0	0	0	0	0
P54726	1	1	64.33	UV excision repair protein RAD23 homolog A OS=Mus musculus GN=Rad23a PE=1 SV=2	Rad23a	186447	218709	186447	106186	526468	1.07612e+06	0	0	0	0	0	0	0	0	0	0	0	0	0	0	0	0	0	0
O55022	1	1	27.35	Membrane-associated progesterone receptor component 1 OS=Mus musculus GN=Pgrmc1 PE=1 SV=4	Pgrmc1	138749	127198	138749	327084	62359.8	94767.1	647351	524589	1.14308e+06	1.78878e+06	1.01205e+06	862472	422184	563658	786863	748640	534836	753693	629294	1.09982e+06	511716	448515	1.15688e+06	1.26646e+06
Q9D8X1	1	1	34.36	Copper homeostasis protein cutC homolog OS=Mus musculus GN=Cutc PE=1 SV=1	Cutc	120297	154570	120297	0	134780	80734.4	0	0	0	0	0	0	0	0	0	0	0	0	0	0	0	0	0	0
Q8BGB7	1	1	48.18	Enolase-phosphatase E1 OS=Mus musculus GN=Enoph1 PE=1 SV=1	Enoph1	3118.89	5075.93	3118.89	681386	1.38967e+06	1.85595e+06	1.04092e+06	1.2211e+06	1.0413e+06	1.44218e+06	436429	894371	1.44963e+06	1.28093e+06	1.35389e+06	1.88463e+06	566581	845213	3.08037e+06	4.49454e+06	4.85771e+06	3.09812e+06	3.99267e+06	4.13627e+06
Q6P9K8	1	1	41.21	Caskin-1 OS=Mus musculus GN=Caskin1 PE=1 SV=2	Caskin1	173765	212699	173765	273441	266847	16119.1	8981.91	12641.9	55330.5	99054.6	2217.25	3690.14	46880.7	61683	76565.7	157373	27405.1	46778	0	0	0	0	0	0
Q9Z2X1	1	1	114.04	Heterogeneous nuclear ribonucleoprotein F OS=Mus musculus GN=Hnrnpf PE=1 SV=3	Hnrnpf	71306.7	92630.2	71306.7	336139	52133.8	89781.4	119452	56562.7	309401	356762	283125	279736	375505	330479	277415	61371.2	183381	241732	450044	679522	1.28844e+06	456182	259914	9058.22
P63084	1	1	41.19	Protein S100-A5 OS=Mus musculus GN=S100a5 PE=3 SV=1	S100a5	55823.8	40137.2	55823.8	1.02413e+06	39824.5	74688.7	7.28454e+06	7.69523e+06	235459	296918	52031.5	117595	2.33432e+06	2.02974e+06	1.23356e+06	2.02165e+06	93711.4	137668	3.90481e+06	5.76874e+06	5.50703e+06	6.69717e+06	4.08373e+06	5.58642e+06
P01831	1	1	27.99	Thy-1 membrane glycoprotein OS=Mus musculus GN=Thy1 PE=1 SV=1	Thy1	37150.6	99583.4	37150.6	2275.97	0	0	6488.76	5939.11	103.95	417.35	185022	280.577	378497	348739	570172	1.26316e+06	251859	483233	1.0866e+06	1.4933e+06	1.83307e+06	1.63203e+06	2.86081e+06	2.21406e+06
Q91ZX7	1	1	23.77	Prolow-density lipoprotein receptor-related protein 1 OS=Mus musculus GN=Lrp1 PE=1 SV=1	Lrp1	151168	265261	151168	3327.76	60841.9	26438	55763.5	15194	8619.7	16485.8	206096	278364	0	0	0	0	0	0	192374	234312	36240.3	25329.4	173618	34499.3
Q9D061	1	1	45.33	Acyl-CoA-binding domain-containing protein 6 OS=Mus musculus GN=Acbd6 PE=1 SV=2	Acbd6	156174	226205	156174	864914	26419.8	369161	930.808	45694.4	248102	287768	297.384	423.917	36854.6	41986.4	44877.2	59669.3	43885.6	91428.3	93568.4	202824	120963	134949	143371	137382
Q8JZK9	1	1	59.94	Hydroxymethylglutaryl-CoA synthase, cytoplasmic OS=Mus musculus GN=Hmgcs1 PE=1 SV=1	Hmgcs1	548678	528947	548678	168919	98221.3	11006.5	0	0	0	0	0	0	70908.8	150154	37897.9	21288.1	108058	189901	126426	11060.3	12224.7	1627.09	49461.3	586.508
Q9WUA2	1	1	39.94	Phenylalanine--tRNA ligase beta subunit OS=Mus musculus GN=Farsb PE=1 SV=2	Farsb	135295	29041	135295	6453.09	0	2251.03	579635	885630	1.21719e+06	1.60322e+06	1.28197e+06	1.26407e+06	929590	989927	1.17689e+06	1.61076e+06	784495	1.27876e+06	0	0	0	0	0	0
Q9JJK2	1	1	34.52	LanC-like protein 2 OS=Mus musculus GN=Lancl2 PE=1 SV=1	Lancl2	434617	690762	434617	484622	673754	953513	784597	602767	762398	1.31896e+06	1.16703e+06	1.32439e+06	453072	545547	815842	841103	464762	770693	933430	1.51405e+06	1.01329e+06	814520	1.41172e+06	1.46509e+06
P11627	1	1	35.69	Neural cell adhesion molecule L1 OS=Mus musculus GN=L1cam PE=1 SV=1	L1cam	70233.9	61380.8	70233.9	73347.4	157851	201875	746971	849257	172.288	0	100801	311235	83219.5	60788.4	107661	157526	81363.9	114897	90109.5	145737	160345	195188	140978	93173.6
Q61771	1	1	20.71	Kinesin-like protein KIF3B OS=Mus musculus GN=Kif3b PE=1 SV=1	Kif3b	562419	509782	562419	136.548	1101.44	2033.83	491675	639593	454085	654146	233998	187940	405149	444488	625317	973204	208133	434336	416473	483247	784384	592496	883965	687604
Q9D8S4	1	1	40.72	Oligoribonuclease, mitochondrial OS=Mus musculus GN=Rexo2 PE=1 SV=2	Rexo2	219968	245342	219968	1113.18	193657	269467	178955	499156	173737	183332	537649	768284	188300	360455	350852	42140.7	49578.5	158576	121617	176922	768524	565195	212308	305160
O35900	1	1	33.53	U6 snRNA-associated Sm-like protein LSm2 OS=Mus musculus GN=Lsm2 PE=1 SV=1	Lsm2	12162.4	6205.93	12162.4	114324	0	34996.9	189088	342323	305759	470026	265535	45848.5	0	0	0	0	0	0	0	0	0	0	0	0
Q9D7I5	1	1	39.07	Phospholysine phosphohistidine inorganic pyrophosphate phosphatase OS=Mus musculus GN=Lhpp PE=1 SV=1	Lhpp	3616.04	7100.15	3616.04	96603.4	67828.7	3013.23	268002	250260	108895	146379	115350	32264.4	192246	242083	143890	124487	149572	204335	276269	208504	235551	204615	474879	497291
Q9Z1W9	1	1	54.08	STE20/SPS1-related proline-alanine-rich protein kinase OS=Mus musculus GN=Stk39 PE=1 SV=1	Stk39	37222	91206.1	37222	48764.3	142685	51988.9	775019	2.90858e+06	774775	1.27782e+06	678076	1.35108e+06	4.49159e+06	5.43812e+06	3.71121e+06	4.65112e+06	3.31109e+06	4.86713e+06	1.21855e+06	1.73673e+06	2.05471e+06	2.17598e+06	1.62003e+06	1.41389e+06
Q91XI1	1	1	50.7	tRNA-dihydrouridine(47) synthase [NAD(P)(+)]-like OS=Mus musculus GN=Dus3l PE=1 SV=1	Dus3l	81659.1	26502.1	81659.1	939556	38632.6	304654	126158	108974	384120	453044	270362	381631	0	0	0	0	0	0	305123	597882	186209	322135	147776	240004
Q11136	1	1	27.22	Xaa-Pro dipeptidase OS=Mus musculus GN=Pepd PE=1 SV=3	Pepd	219034	292476	219034	1.15805e+06	151852	64075.8	750413	409776	2.13134e+06	2.00256e+06	3.95575e+06	198107	187638	99043.9	578653	872761	62036.3	125731	2.0307e+06	1.75715e+06	3.38967e+06	944724	1.03956e+06	656455
Q6PDM2	1	1	28.15	Serine/arginine-rich splicing factor 1 OS=Mus musculus GN=Srsf1 PE=1 SV=3	Srsf1	0	0	0	158262	226.912	37335.7	276009	258201	52430.5	103742	273357	312468	274529	303272	245184	422824	354098	577586	0	0	0	0	0	0
P28740	1	1	23.99	Kinesin-like protein KIF2A OS=Mus musculus GN=Kif2a PE=1 SV=2	Kif2a	0	1809.94	0	0	26737.7	0	119465	61416.8	130360	233725	30516.8	52811.8	348283	378025	584062	584762	173552	427634	504342	553429	730907	590938	1.30552e+06	1.20915e+06
Q8BG93	1	1	35.4	Nucleotide triphosphate diphosphatase NUDT15 OS=Mus musculus GN=Nudt15 PE=1 SV=1	Nudt15	16979	25433.5	16979	0	242586	559.598	0	0	0	0	0	0	2575.35	2424.7	7400.61	522516	2.64691	2238.76	405387	463084	404315	422810	1.01455e+06	822145
Q8BK26	1	1	31.21	F-box only protein 44 OS=Mus musculus GN=Fbxo44 PE=1 SV=1	Fbxo44	39679.7	28790.8	39679.7	322439	36181.1	37513.4	346929	176194	415786	487701	822530	39218.4	0	0	0	0	0	0	385242	476615	1.55921e+06	870183	485969	28312
Q9D187	1	1	29.34	Mitotic spindle-associated MMXD complex subunit MIP18 OS=Mus musculus GN=Fam96b PE=1 SV=1	Fam96b	3166.24	76675.5	3166.24	167126	72042.6	113147	0	0	0	0	0	0	477794	551652	311647	86968	73438.4	466560	0	0	0	0	0	0
Q78YZ6	1	1	30.25	Short coiled-coil protein OS=Mus musculus GN=Scoc PE=1 SV=1	Scoc	2268.66	504.917	2268.66	1748.4	273511	37325.8	10033.3	2607.89	507253	719298	273221	298794	583875	42003.2	301059	29944.9	251557	517918	1.08957e+06	1.27545e+06	1.03178e+06	779098	1.21627e+06	1.53605e+06
Q9QZB7	1	1	58.07	Actin-related protein 10 OS=Mus musculus GN=Actr10 PE=1 SV=2	Actr10	80756.9	98548.2	80756.9	414671	72753.9	63853.1	733561	780790	1.07135e+06	1.81731e+06	1.09878e+06	1.103e+06	1.06735e+06	907529	1.95193e+06	2.82383e+06	874370	1.1545e+06	1.4187e+06	1.56786e+06	2.01061e+06	1.56546e+06	1.97323e+06	1.21447e+06
Q9ER00	1	1	28.86	Syntaxin-12 OS=Mus musculus GN=Stx12 PE=1 SV=1	Stx12	21181.3	23772.4	21181.3	10371.2	158469	19975.8	15453.4	8247.43	2780.8	180000	178814	57899.9	877645	1.19327e+06	513541	32884.3	734707	918427	638628	770559	725112	466477	203099	983071
O09167	1	1	24.6	60S ribosomal protein L21 OS=Mus musculus GN=Rpl21 PE=1 SV=3	Rpl21	297.741	4663.31	297.741	456592	18123.4	0	17849.5	16150.4	160634	95072.6	3470.54	2016.9	0	0	0	0	0	0	0	0	0	0	0	0
P84089	1	1	15.65	Enhancer of rudimentary homolog OS=Mus musculus GN=Erh PE=1 SV=1	Erh	91430.5	289394	91430.5	464253	113742	124066	0	0	0	0	0	0	710769	624778	291374	426364	249353	694314	404110	995034	314288	316438	1.22045e+06	1.24299e+06
Q9R111	1	1	31.32	Guanine deaminase OS=Mus musculus GN=Gda PE=1 SV=1	Gda	80718	64856.4	80718	140012	247152	59912.6	639162	294363	1.56096e+06	2.24202e+06	514066	854927	822613	1.07144e+06	3.02872e+06	3.84019e+06	1.01334e+06	1.51906e+06	1.54077e+06	1.78065e+06	1.38115e+06	1.40027e+06	3.61137e+06	4.05754e+06
P62301	1	1	38.17	40S ribosomal protein S13 OS=Mus musculus GN=Rps13 PE=1 SV=2	Rps13	0	2966.26	0	82575.1	0	33036.2	969805	729800	840776	1.63545e+06	683715	818186	735880	1.01616e+06	1.11123e+06	2.34219e+06	654994	1.26526e+06	846457	1.48334e+06	1.39385e+06	1.33592e+06	2.89931e+06	3.46504e+06
O89086	1	1	28.85	RNA-binding protein 3 OS=Mus musculus GN=Rbm3 PE=1 SV=1	Rbm3	140636	154835	140636	741683	136231	42035.8	52587.1	27988.1	202117	328598	596037	506359	225735	250053	272400	80803.9	288806	530112	184117	286174	87824.8	65794	373609	377433
Q8R1T1	1	1	35.13	Charged multivesicular body protein 7 OS=Mus musculus GN=Chmp7 PE=1 SV=1	Chmp7	141337	177627	141337	75578.4	585350	77382.8	386743	230670	626363	903700	432267	539506	259640	541202	300847	395312	212692	386134	707837	1.11731e+06	1.84309e+06	1.82023e+06	959853	29688.3
Q01063	1	1	67.12	cAMP-specific 3',5'-cyclic phosphodiesterase 4D OS=Mus musculus GN=Pde4d PE=1 SV=2	Pde4d	47484.8	97857.1	47484.8	227343	104858	67336	234799	264123	531844	607699	317117	476821	361362	486395	149130	205491	210969	243253	472141	525397	1.00688e+06	861391	107864	163864
Q9D8U8	1	1	32.3	Sorting nexin-5 OS=Mus musculus GN=Snx5 PE=1 SV=1	Snx5	23707.8	22109.8	23707.8	100451	162532	68885.5	594335	857535	1.45645e+06	1.72863e+06	1.5436e+06	1.5541e+06	462217	885076	733402	1.223e+06	546140	948862	23387.8	309434	52420.1	66775.3	54246	360884
P63163	1	1	39.02	Small nuclear ribonucleoprotein-associated protein N OS=Mus musculus GN=Snrpn PE=1 SV=1	Snrpn	538.71	22869.7	538.71	51230.3	15785.6	3603.29	49799.3	32417.7	0	0	58996.3	60645.9	24590.6	27384.7	3874.59	76827.9	9080.16	91177.1	32616.2	66304.6	1092.85	6696.23	21352.7	58569
O54984	1	1	31.7	ATPase Asna1 OS=Mus musculus GN=Asna1 PE=1 SV=2	Asna1	1662.5	442.704	1662.5	329502	1371.98	1.02064e+06	662711	706173	1.34217e+06	2.32907e+06	1.1608e+06	1.36985e+06	1.34151e+06	1.46164e+06	1.44573e+06	2.27149e+06	830527	1.52975e+06	1.6707e+06	2.49918e+06	1.32449e+06	1.19278e+06	2.89582e+06	3.06303e+06
Q80U57	1	1	33.41	Regulating synaptic membrane exocytosis protein 3 OS=Mus musculus GN=Rims3 PE=1 SV=2	Rims3	12127.2	16274.6	12127.2	85520.4	24294.6	48320.4	213830	217388	469588	524644	280305	291059	303150	397758	644090	827657	334975	614049	0	0	0	0	0	0
Q921F2	1	1	25.21	TAR DNA-binding protein 43 OS=Mus musculus GN=Tardbp PE=1 SV=1	Tardbp	80086.3	93932.3	80086.3	573570	44677.7	102972	0	0	0	0	0	0	0	0	0	0	0	0	0	0	0	0	0	0
P28741	1	1	51.42	Kinesin-like protein KIF3A OS=Mus musculus GN=Kif3a PE=1 SV=2	Kif3a	73538.8	130985	73538.8	790311	128307	65702.6	507774	798345	712135	778903	290685	740463	879519	1.21278e+06	1.30478e+06	735649	373307	513769	505196	376021	1.41563e+06	764659	766247	1.39192e+06
Q8BG05	1	1	99.63	Heterogeneous nuclear ribonucleoprotein A3 OS=Mus musculus GN=Hnrnpa3 PE=1 SV=1	Hnrnpa3	7265.88	218660	7265.88	549851	25420.3	32993.8	536775	1.21415e+06	1.45083e+06	2.36708e+06	451569	2.71834e+06	1.2354e+06	1.59195e+06	1.80799e+06	2.57961e+06	1.48173e+06	2.43216e+06	1.84119e+06	3.15763e+06	1.56203e+06	1.67623e+06	4.39003e+06	4.96578e+06
Q8K4R4	1	1	43.77	Cytoplasmic phosphatidylinositol transfer protein 1 OS=Mus musculus GN=Pitpnc1 PE=1 SV=1	Pitpnc1	0	0	0	272817	0	0	304330	211850	1.17006e+06	1.60923e+06	614805	1.16725e+06	424549	503527	748733	1.29538e+06	733885	976599	1.31283e+06	1.57406e+06	1.04595e+06	1.23255e+06	1.26089e+06	547205
Q61189	1	1	74.42	Methylosome subunit pICln OS=Mus musculus GN=Clns1a PE=1 SV=1	Clns1a	195741	342400	195741	562835	365657	351789	546707	231058	297668	333497	593458	468550	317595	299426	213445	504425	317351	494229	0	0	0	0	0	0
Q9JKN6	1	1	59.36	RNA-binding protein Nova-1 OS=Mus musculus GN=Nova1 PE=1 SV=2	Nova1	207030	205068	207030	521510	353979	465616	67441.7	43969.4	455835	607309	170284	267680	190512	269638	140995	194520	166097	270276	0	0	0	0	0	0
Q6P5F6	1	1	33.22	Zinc transporter ZIP10 OS=Mus musculus GN=Slc39a10 PE=1 SV=1	Slc39a10	370896	503534	370896	19019.8	109117	100576	0	0	0	0	0	0	0	0	0	0	0	0	0	0	0	0	0	0
O88851	1	1	49.69	Putative hydrolase RBBP9 OS=Mus musculus GN=Rbbp9 PE=1 SV=2	Rbbp9	786135	853389	786135	2.40607e+06	669179	1.52592e+06	1.95469e+06	1.30381e+06	2.42948e+06	3.95774e+06	1.57879e+06	2.64305e+06	1.5209e+06	1.97972e+06	2.65105e+06	3.72256e+06	1.31875e+06	2.35363e+06	1.76678e+06	2.55472e+06	2.08888e+06	1.98796e+06	4.61703e+06	4.00965e+06
P06801	1	1	55.85	NADP-dependent malic enzyme OS=Mus musculus GN=Me1 PE=1 SV=2	Me1	2.00699e+06	2.7163e+06	2.00699e+06	2.34973e+06	220431	2.33229e+06	489333	545165	889379	1.17654e+06	1.45005e+06	1.19989e+06	779622	1.36066e+06	1.4359e+06	3.28455e+06	1.19541e+06	1.80728e+06	1.41666e+06	1.43039e+06	1.82225e+06	899697	4.98044e+06	6.48072e+06
Q91VC7	1	1	36.53	Protein phosphatase 1 regulatory subunit 14A OS=Mus musculus GN=Ppp1r14a PE=1 SV=1	Ppp1r14a	170365	391460	170365	2.14187e+06	1.33709e+06	5.43372e+06	476423	541514	4.23699e+06	5.78575e+06	3.19841e+06	4.38264e+06	2.50782e+06	3.0609e+06	2.03512e+06	1.00355e+06	840929	1.36014e+06	4.10933e+06	4.98661e+06	3.23887e+06	2.98264e+06	3.27311e+06	4.75527e+06
P62881	1	1	77.38	Guanine nucleotide-binding protein subunit beta-5 OS=Mus musculus GN=Gnb5 PE=1 SV=1	Gnb5	115043	95105.9	115043	2.94662e+06	485300	24793.1	432988	499798	62074.5	67878.7	616099	613218	200212	266425	32122.2	133109	734807	590465	448073	681128	1.03582e+06	646632	34048.3	52629
P56375	1	1	32.16	Acylphosphatase-2 OS=Mus musculus GN=Acyp2 PE=1 SV=2	Acyp2	35359.6	83658.4	35359.6	139702	60602.1	52805.2	274573	331329	0	0	310176	2131.18	752343	855007	989729	1.78049e+06	1.02041e+06	1.58356e+06	1.24777e+06	1.76696e+06	1.27583e+06	1.10746e+06	2.99895e+06	3.21775e+06
Q6RHR9	1	1	34.22	Membrane-associated guanylate kinase, WW and PDZ domain-containing protein 1 OS=Mus musculus GN=Magi1 PE=1 SV=1	Magi1	138537	168421	138537	0	218915	160432	211223	275498	0	0	4351.03	3516.22	0	0	0	0	0	0	0	0	0	0	0	0
Q9EPJ9	1	1	26.83	ADP-ribosylation factor GTPase-activating protein 1 OS=Mus musculus GN=Arfgap1 PE=1 SV=2	Arfgap1	792926	999848	792926	349229	238089	415363	12799.3	17598.6	442853	499845	1847.73	14920.7	189398	119935	34774.8	74131.8	118403	452365	0	0	0	0	0	0
O55106	1	1	49.05	Striatin OS=Mus musculus GN=Strn PE=1 SV=2	Strn	1.3287e+06	1.65436e+06	1.3287e+06	2.16096e+06	561779	1.07413e+06	501282	592931	902308	1.48437e+06	808056	989933	0	0	0	0	0	0	1.62125e+06	1.96086e+06	1.32569e+06	1.03043e+06	1.429e+06	1.4654e+06
P62075	1	1	91.58	Mitochondrial import inner membrane translocase subunit Tim13 OS=Mus musculus GN=Timm13 PE=1 SV=1	Timm13	113241	183683	113241	1.07461e+06	151587	536807	1.2822e+06	1.63253e+06	909858	1.8485e+06	1.55398e+06	1.74979e+06	649620	1.06808e+06	1.31603e+06	2.03085e+06	718323	970255	978366	2.05395e+06	1.21815e+06	1.32268e+06	2.95596e+06	3.08981e+06
Q3UHL1	1	1	34.47	CaM kinase-like vesicle-associated protein OS=Mus musculus GN=Camkv PE=1 SV=2	Camkv	398644	453946	398644	87458.9	473133	344703	847025	128913	2.32371e+06	3.5987e+06	1.34563e+06	1.6554e+06	563415	736969	777303	150665	699594	866443	1.49059e+06	1.61501e+06	2.08542e+06	2.08928e+06	748813	404950
Q9CZR8	1	1	24.11	Elongation factor Ts, mitochondrial OS=Mus musculus GN=Tsfm PE=1 SV=1	Tsfm	1.11685e+06	1.37195e+06	1.11685e+06	1.77826e+06	1.30918e+06	1.36036e+06	224793	985984	1.17063e+06	1.80797e+06	2.09795e+06	2.28904e+06	625701	1.06119e+06	856151	1.05323e+06	694968	1.21104e+06	8944.37	1.64664e+06	177.511	4263.02	1333.97	13947
Q99KX1	1	1	25.14	Myeloid leukemia factor 2 OS=Mus musculus GN=Mlf2 PE=1 SV=1	Mlf2	595999	692504	595999	0	4809.19	5742.59	0	0	0	0	0	0	0	0	0	0	0	0	0	0	0	0	0	0
Q9DB60	1	1	23.81	Prostamide/prostaglandin F synthase OS=Mus musculus GN=Fam213b PE=1 SV=1	Fam213b	258158	388586	258158	1.4634e+06	1.0689e+06	1.2844e+06	1.19213e+06	1.29269e+06	487144	942212	698387	672783	855940	1.70853e+06	1.4147e+06	3.35308e+06	734688	1.37143e+06	1.86439e+06	1.58296e+06	1.84098e+06	3.1252e+06	2.02107e+06	2.09091e+06
Q6PEV3	1	1	21.17	WAS/WASL-interacting protein family member 2 OS=Mus musculus GN=Wipf2 PE=1 SV=1	Wipf2	489082	750883	489082	587176	359511	418482	55784.7	1184.79	2881.61	5602.71	374649	1807.07	743225	600712	948964	10567.9	1.08631e+06	1.24627e+06	1.03825e+06	791456	1.08354e+06	916790	2.73504e+06	2.55495e+06
Q8K2U2	1	1	30.12	Alpha-ketoglutarate-dependent dioxygenase alkB homolog 6 OS=Mus musculus GN=Alkbh6 PE=2 SV=3	Alkbh6	168609	197768	168609	0	0	0	0	0	0	0	0	0	0	0	0	0	0	0	0	0	0	0	0	0
O09172	1	1	45.66	Glutamate--cysteine ligase regulatory subunit OS=Mus musculus GN=Gclm PE=1 SV=1	Gclm	471695	540317	471695	1.32545e+06	987994	1.52571e+06	1.3052e+06	422993	1.48128e+06	2.85e+06	2.10974e+06	3.26209e+06	3.25783e+06	3.31809e+06	2.78135e+06	4.99591e+06	1.60179e+06	2.50459e+06	2.14978e+06	5.35422e+06	3.18247e+06	3.49337e+06	5.57753e+06	7.27442e+06
Q9CT10	1	1	34.1	Ran-binding protein 3 OS=Mus musculus GN=Ranbp3 PE=1 SV=2	Ranbp3	293336	461943	293336	1.42939e+06	631361	705661	604686	742037	978130	912829	92819.7	611974	676170	606360	1.29188e+06	1.27413e+06	430804	1.19159e+06	2.34454e+06	1.98283e+06	1.97665e+06	2.17084e+06	4.71119e+06	4.20755e+06
Q4VAE3	1	1	20.26	Transmembrane protein 65 OS=Mus musculus GN=Tmem65 PE=1 SV=1	Tmem65	5823.98	751.067	5823.98	1.17107e+06	714450	712140	861630	883416	1345.44	364.651	15944.2	880485	343733	482420	294627	666966	422411	630215	440235	451406	1.57866e+06	1.24785e+06	386027	961681
P70202	1	1	34.84	Latexin OS=Mus musculus GN=Lxn PE=1 SV=2	Lxn	67799.3	170810	67799.3	592732	333806	516927	0	0	0	0	0	0	51158.3	548058	566515	1.14427e+06	107284	259776	0	0	0	0	0	0
Q6P4S6	1	1	38.79	Serine/threonine-protein kinase SIK3 OS=Mus musculus GN=Sik3 PE=1 SV=3	Sik3	168558	177802	168558	490478	353553	341957	545244	726128	14942.4	27645.9	154602	146023	350559	258242	669325	1.26147e+06	280203	474289	668406	753609	405640	400112	976302	593567
Q9DD18	1	1	86.7	D-tyrosyl-tRNA(Tyr) deacylase 1 OS=Mus musculus GN=Dtd1 PE=1 SV=2	Dtd1	319449	483398	319449	562286	304816	413658	1.71541e+06	1.80151e+06	1.04405e+06	1.67623e+06	1.01516e+06	1.13109e+06	0	0	0	0	0	0	714712	848345	537882	390350	425593	558717
Q9CQQ7	1	1	53.45	ATP synthase F(0) complex subunit B1, mitochondrial OS=Mus musculus GN=Atp5f1 PE=1 SV=1	Atp5f1	770934	1.11891e+06	770934	1136.9	223582	21338.5	0	0	0	0	0	0	54938.5	9216.03	57170.3	214718	8513.81	50504.5	71414.9	92381.5	29125.8	75973.6	37420.7	66750.8
Q5SSL4	1	1	36.57	Active breakpoint cluster region-related protein OS=Mus musculus GN=Abr PE=1 SV=1	Abr	790492	1.29616e+06	790492	930332	3.85746e+06	5.32327e+06	2.74451e+06	1.53363e+06	1.53896e+06	2.72702e+06	1.54482e+06	1.65726e+06	1.86332e+06	1.87534e+06	2.34858e+06	3.47424e+06	965400	2.46054e+06	3.09389e+06	4.36495e+06	2.47174e+06	3.0136e+06	5.90978e+06	6.30778e+06
Q91XF0	1	1	20.56	Pyridoxine-5'-phosphate oxidase OS=Mus musculus GN=Pnpo PE=1 SV=1	Pnpo	530607	1.22538e+06	530607	1.75666e+06	709654	763570	212971	139647	474466	746982	620136	840912	827847	692431	321252	638283	784347	1.07526e+06	738046	797916	291894	457099	650787	594445
Q9DCJ1	1	1	26.64	Target of rapamycin complex subunit LST8 OS=Mus musculus GN=Mlst8 PE=1 SV=1	Mlst8	76528.8	101408	76528.8	0	100851	72275	0	0	0	0	0	0	0	0	0	0	0	0	0	0	0	0	0	0
Q91VR8	1	1	38.38	Protein BRICK1 OS=Mus musculus GN=Brk1 PE=1 SV=1	Brk1	224820	388606	224820	477833	423902	393616	538378	718993	322990	674803	110603	393521	312923	314407	815613	1.53124e+06	179632	432891	1.36478e+06	1.91698e+06	1.62373e+06	2.19018e+06	1.88141e+06	2.16269e+06
Q8VBT9	1	1	40.86	Tether containing UBX domain for GLUT4 OS=Mus musculus GN=Aspscr1 PE=1 SV=1	Aspscr1	321535	459191	321535	584001	486744	424101	193158	17876.4	20320.7	30393.8	682954	14305.1	2.07162e+06	3.47772e+06	2.25074e+06	3.28086e+06	1.36731e+06	1.77339e+06	614572	1.12509e+06	848679	649807	2.75903e+06	2.69407e+06
P27612	1	1	47.11	Phospholipase A-2-activating protein OS=Mus musculus GN=Plaa PE=1 SV=4	Plaa	477085	525545	477085	156676	64784	7591.32	46568.9	9717.79	648166	1.13115e+06	70117.1	20214.1	113356	185021	236098	186419	189091	372607	488090	640101	280157	395487	962884	396890
Q00PI9	1	1	80.77	Heterogeneous nuclear ribonucleoprotein U-like protein 2 OS=Mus musculus GN=Hnrnpul2 PE=1 SV=2	Hnrnpul2	91803.3	120242	91803.3	408816	167349	219392	54568.6	91148.4	231787	313060	300797	265594	414063	338949	308749	410189	318290	685377	451306	657944	403353	429037	858996	948456
Q9JME5	1	1	42.95	AP-3 complex subunit beta-2 OS=Mus musculus GN=Ap3b2 PE=1 SV=2	Ap3b2	1.59786e+06	1.95896e+06	1.59786e+06	1.23946e+06	527142	499783	429235	381149	1.03072e+06	1.71868e+06	951561	1.07182e+06	238960	238275	687831	265017	541808	735108	958506	988257	217199	208629	1.36339e+06	1.15623e+06
Q99KN9	1	1	34.88	Clathrin interactor 1 OS=Mus musculus GN=Clint1 PE=1 SV=2	Clint1	416053	553644	416053	1421.68	10263.7	7914.11	0	0	0	0	0	0	0	0	0	0	0	0	0	0	0	0	0	0
Q9Z2A5	1	1	32.42	Arginyl-tRNA--protein transferase 1 OS=Mus musculus GN=Ate1 PE=1 SV=2	Ate1	112771	244210	112771	110556	449971	344198	0	0	0	0	0	0	250345	462435	392137	277586	45066.7	97931.1	127337	268195	305471	331164	481233	786133
Q80VC9	1	1	26.25	Calmodulin-regulated spectrin-associated protein 3 OS=Mus musculus GN=Camsap3 PE=1 SV=1	Camsap3	930008	851829	930008	228032	477618	110036	0	0	0	0	0	0	0	0	0	0	0	0	0	0	0	0	0	0
Q9JJF0	1	1	37.28	Nucleosome assembly protein 1-like 5 OS=Mus musculus GN=Nap1l5 PE=1 SV=1	Nap1l5	142710	213767	142710	236565	215388	202552	67178.3	55237	22897.7	25880.8	237511	523675	189198	107368	237202	388279	247759	364600	233780	435577	977562	673933	413260	590546
Q91WJ8	1	1	40.01	Far upstream element-binding protein 1 OS=Mus musculus GN=Fubp1 PE=1 SV=1	Fubp1	204636	210002	204636	819244	148454	211621	100459	96.9797	0	208.04	0	19637.9	0	0	0	0	0	0	255519	468364	366563	341365	93071.2	216856
Q9R257	1	1	37.11	Heme-binding protein 1 OS=Mus musculus GN=Hebp1 PE=1 SV=2	Hebp1	278526	490254	278526	34923.5	56535.8	172735	0	0	0	0	0	0	0	0	0	0	0	0	0	0	0	0	0	0
Q5XG71	1	1	29.05	Small subunit processome component 20 homolog OS=Mus musculus GN=Utp20 PE=1 SV=2	Utp20	479950	612947	479950	465652	188247	271466	294782	618620	0	0	102571	140192	4.25964e+06	3.78751e+06	3.92076e+06	4.98679e+06	6.67286e+06	8.36583e+06	1.05604e+07	7.40462e+06	1.21601e+07	9.10158e+06	9.72112e+06	1.07556e+07
P23591	1	1	56.57	GDP-L-fucose synthase OS=Mus musculus GN=Tsta3 PE=1 SV=3	Tsta3	272413	7227.89	272413	276778	1408.1	2540.82	163809	129594	26685.8	9467.17	298852	366069	161177	114491	140130	410113	133567	258400	214882	482610	412948	336470	186022	447566
Q7TT50	1	1	45.25	Serine/threonine-protein kinase MRCK beta OS=Mus musculus GN=Cdc42bpb PE=1 SV=2	Cdc42bpb	227565	287768	227565	6.86205	1041.47	2671.14	0	0	0	0	0	0	0	0	0	0	0	0	0	0	0	0	0	0
P61255	1	1	25.46	60S ribosomal protein L26 OS=Mus musculus GN=Rpl26 PE=1 SV=1	Rpl26	133455	149096	133455	755278	789680	792897	1.65952e+06	1.83268e+06	54331.6	45255	64833.8	123201	193782	150571	372469	232579	203545	210449	0	0	0	0	0	0
Q8CIB5	1	1	37.99	Fermitin family homolog 2 OS=Mus musculus GN=Fermt2 PE=1 SV=1	Fermt2	2.16213e+06	2.35358e+06	2.16213e+06	88325	291169	1.62581e+06	0	0	0	0	0	0	0	0	0	0	0	0	142202	334281	192563	293903	63342.2	98612.6
Q8C166	1	1	37.11	Copine-1 OS=Mus musculus GN=Cpne1 PE=1 SV=1	Cpne1	135989	142481	135989	404263	372477	146279	3.25214e+06	695178	383539	740253	741418	409193	532662	809112	582641	906744	328906	726961	579471	648794	423740	866008	828758	898976
A2ADY9	1	1	62.68	Protein DDI1 homolog 2 OS=Mus musculus GN=Ddi2 PE=1 SV=1	Ddi2	142444	225944	142444	216833	317351	255849	635308	239325	750013	1.10615e+06	893123	1.06455e+06	634952	786956	858690	930576	513792	795200	70197.8	221143	38410.7	116208	171051	182858
Q9CYR6	1	1	34.59	Phosphoacetylglucosamine mutase OS=Mus musculus GN=Pgm3 PE=1 SV=1	Pgm3	81859.4	241408	81859.4	2.01617e+06	698910	572833	920791	1.14284e+06	1.51151e+06	1.74073e+06	1.86965e+06	1.22596e+06	903876	875091	1.432e+06	1.07097e+06	797924	1.14874e+06	654696	1.05826e+06	1.19532e+06	852790	1.60313e+06	801243
Q9QXG4	1	1	25.83	Acetyl-coenzyme A synthetase, cytoplasmic OS=Mus musculus GN=Acss2 PE=1 SV=2	Acss2	184170	320611	184170	253397	815570	654935	315471	4515.97	428587	587164	347460	221324	715349	755253	441387	805089	389276	845896	486772	625247	227163	261443	414346	510612
Q9Z2S7	1	1	46.77	TSC22 domain family protein 3 OS=Mus musculus GN=Tsc22d3 PE=1 SV=2	Tsc22d3	195447	357021	195447	75975.6	139254	194783	37975.8	107611	580.778	917.254	12777	95415.9	76769.1	20174.5	74809.5	133646	5722.19	83022.9	0	0	0	0	0	0
P30415	1	1	37.62	NK-tumor recognition protein OS=Mus musculus GN=Nktr PE=1 SV=4	Nktr	338360	497666	338360	1020.46	294592	76014.2	0	0	0	0	0	0	0	0	0	0	0	0	0	0	0	0	0	0
Q9Z1G4	7	6	324.74	V-type proton ATPase 116 kDa subunit a isoform 1 OS=Mus musculus GN=Atp6v0a1 PE=1 SV=3	Atp6v0a1	375993	546071	375993	467066	603234	727406	1.27914e+06	1.67249e+06	2.25511e+06	3.94287e+06	1.85604e+06	1.66603e+06	1.0096e+06	994760	1.51214e+06	2.40628e+06	731350	1.12503e+06	1.01473e+06	2.07942e+06	1.7645e+06	1.79798e+06	3.39047e+06	4.43247e+06
Q61990	7	7	485.27	Poly(rC)-binding protein 2 OS=Mus musculus GN=Pcbp2 PE=1 SV=1	Pcbp2	3.84574e+06	4.6477e+06	3.84574e+06	1.05511e+07	5.19765e+06	5.31595e+06	8.00127e+06	8.98313e+06	3.23359e+06	4.37094e+06	5.95231e+06	7.55645e+06	5.97487e+06	5.28527e+06	6.46872e+06	9.36485e+06	3.96765e+06	7.57275e+06	7.51335e+06	9.92883e+06	9.09393e+06	8.10885e+06	1.90097e+07	1.96964e+07
Q9QYG0	7	7	451.68	Protein NDRG2 OS=Mus musculus GN=Ndrg2 PE=1 SV=1	Ndrg2	3.21475e+06	4.35251e+06	3.21475e+06	1.04859e+07	4.34569e+06	5.52214e+06	6.70891e+06	6.51365e+06	1.89125e+07	2.90392e+07	8.31084e+06	9.09237e+06	4.00061e+06	4.00512e+06	5.44973e+06	7.42129e+06	4.23544e+06	6.22743e+06	6.11202e+06	1.02787e+07	4.44883e+06	5.69722e+06	1.32903e+07	1.37388e+07
P47963	7	7	249.03	60S ribosomal protein L13 OS=Mus musculus GN=Rpl13 PE=1 SV=3	Rpl13	1.10582e+06	1.52219e+06	1.10582e+06	3.24554e+06	1.67868e+06	1.43536e+06	2.70448e+06	2.66431e+06	6583.74	2450.93	515916	477658	1.81058e+06	1.81225e+06	1.05607e+06	116088	3.03758e+06	2.77406e+06	1.59482e+06	1.30488e+06	2.3549e+06	1.91178e+06	1.86347e+06	2.14515e+06
P62918	6	6	473.4	60S ribosomal protein L8 OS=Mus musculus GN=Rpl8 PE=1 SV=2	Rpl8	3.80878e+06	4.9885e+06	3.80878e+06	150335	3.06305e+06	2.9068e+06	8.96128e+06	1.05516e+07	5.11751e+06	8.94949e+06	2.90998e+06	3.16952e+06	2.37353e+06	1.94204e+06	4.05821e+06	6.73772e+06	1.39148e+06	2.78723e+06	2.21867e+06	3.56662e+06	6.26161e+06	5.88809e+06	1.00416e+07	1.0014e+07
P48036	6	6	359.51	Annexin A5 OS=Mus musculus GN=Anxa5 PE=1 SV=1	Anxa5	3.4569e+06	4.55638e+06	3.4569e+06	2.28919e+06	284522	4.74285e+06	3.29925e+06	2.24372e+06	7.70849e+06	1.13471e+07	4.81341e+06	5.62248e+06	4.02717e+06	6.42634e+06	4.57687e+06	5.48498e+06	4.62036e+06	6.95579e+06	5.998e+06	8.67847e+06	6.77067e+06	5.97912e+06	7.48963e+06	6.55962e+06
Q93092	6	6	489.95	Transaldolase OS=Mus musculus GN=Taldo1 PE=1 SV=2	Taldo1	1.44416e+06	2.16334e+06	1.44416e+06	2.59132e+06	2.53032e+06	2.8213e+06	7.21785e+06	7.56772e+06	1.04079e+06	1.3981e+06	3.02561e+06	3.33821e+06	2.57145e+06	2.16506e+06	6.70154e+06	1.04608e+07	1.70762e+06	2.98653e+06	5.23138e+06	7.26474e+06	5.17809e+06	6.98026e+06	5.96485e+06	5.65185e+06
O55023	6	6	475.91	Inositol monophosphatase 1 OS=Mus musculus GN=Impa1 PE=1 SV=1	Impa1	3.391e+06	5.92738e+06	3.391e+06	9.90523e+06	6.11506e+06	7.93783e+06	1.54721e+07	1.78361e+07	6.58894e+06	1.18396e+07	8.10384e+06	1.18543e+07	3.38374e+06	2.44057e+06	6.78318e+06	1.14132e+07	2.43831e+06	4.13998e+06	5.3926e+06	7.36087e+06	5.3164e+06	7.09016e+06	1.10796e+07	1.02105e+07
Q9DBP5	8	8	612.07	UMP-CMP kinase OS=Mus musculus GN=Cmpk1 PE=1 SV=1	Cmpk1	4.96539e+06	6.22043e+06	4.96539e+06	7.85958e+06	4.50119e+06	8.17004e+06	9.57398e+06	7.4102e+06	4.782e+06	7.8825e+06	4.99444e+06	7.6992e+06	7.41448e+06	9.84088e+06	7.26082e+06	9.49787e+06	2.86141e+06	5.10262e+06	8.63618e+06	1.20883e+07	1.34583e+07	1.08424e+07	1.5768e+07	1.52607e+07
P55264	8	8	586.58	Adenosine kinase OS=Mus musculus GN=Adk PE=1 SV=2	Adk	2.40598e+06	3.2912e+06	2.40598e+06	5.60157e+06	621137	830608	2.81793e+06	3.79451e+06	1.18184e+06	1.44069e+06	3.88986e+06	4.91833e+06	2.33157e+06	2.09421e+06	2.19369e+06	2.88552e+06	2.7509e+06	4.17668e+06	3.6299e+06	4.75495e+06	5.76978e+06	5.25079e+06	6.24572e+06	7.00045e+06
P16330	8	7	522.47	2',3'-cyclic-nucleotide 3'-phosphodiesterase OS=Mus musculus GN=Cnp PE=1 SV=3	Cnp	2.15784e+06	3.48831e+06	2.15784e+06	3.85021e+06	2.98293e+06	3.68938e+06	3.44594e+06	3.7876e+06	8.12664e+06	1.01587e+07	9.05969e+06	1.07753e+07	3.53484e+06	4.30016e+06	5.18752e+06	6.44391e+06	3.43591e+06	6.05951e+06	7.46532e+06	1.06808e+07	7.13466e+06	6.64169e+06	8.8502e+06	7.15057e+06
Q9CPV4	8	8	504.52	Glyoxalase domain-containing protein 4 OS=Mus musculus GN=Glod4 PE=1 SV=1	Glod4	5.99802e+06	8.39549e+06	5.99802e+06	1.1561e+07	8.73031e+06	1.39391e+07	8.77498e+06	1.00172e+07	6.55981e+06	1.31812e+07	1.0273e+07	1.26799e+07	9.45561e+06	1.11635e+07	1.15993e+07	8.10153e+06	5.72979e+06	9.71571e+06	1.31048e+07	2.06535e+07	1.82866e+07	1.24722e+07	2.34524e+07	2.86319e+07
P50518	8	8	706.27	V-type proton ATPase subunit E 1 OS=Mus musculus GN=Atp6v1e1 PE=1 SV=2	Atp6v1e1	7.33382e+06	9.30911e+06	7.33382e+06	2.22551e+07	1.61252e+07	2.28339e+07	1.90889e+07	1.92584e+07	2.58038e+07	3.5478e+07	2.81299e+07	1.53978e+07	2.24712e+07	2.38042e+07	3.73082e+07	3.35101e+07	1.68542e+07	2.20114e+07	3.60061e+07	4.66302e+07	4.17436e+07	2.74595e+07	6.61635e+07	4.90607e+07
Q64105	8	8	486.05	Sepiapterin reductase OS=Mus musculus GN=Spr PE=1 SV=1	Spr	3.11293e+06	2.41866e+06	3.11293e+06	1.71452e+06	992932	4.15735e+06	3.13217e+06	2.82275e+06	4.35878e+06	6.1955e+06	1.34566e+06	1.69163e+06	3.02913e+06	3.52629e+06	3.52724e+06	3.84411e+06	2.45329e+06	3.45051e+06	4.53179e+06	6.42452e+06	4.33797e+06	4.12365e+06	1.09535e+07	1.3038e+07
Q8R001	5	5	350.34	Microtubule-associated protein RP/EB family member 2 OS=Mus musculus GN=Mapre2 PE=1 SV=1	Mapre2	1.5267e+06	2.45338e+06	1.5267e+06	4.1336e+06	3.02262e+06	3.1925e+06	9.0127e+06	8.73968e+06	6.02715e+06	1.08733e+07	6.12595e+06	7.18016e+06	3.76851e+06	3.90032e+06	5.92064e+06	1.24314e+07	2.97455e+06	5.76337e+06	7.16846e+06	8.0359e+06	5.11009e+06	7.97899e+06	6.30151e+06	6.60785e+06
Q9QUR7	5	5	432.4	Peptidyl-prolyl cis-trans isomerase NIMA-interacting 1 OS=Mus musculus GN=Pin1 PE=1 SV=1	Pin1	3.83872e+06	5.82721e+06	3.83872e+06	4.6824e+06	3.80832e+06	5.06344e+06	4.66294e+06	4.13481e+06	5.0668e+06	8.42424e+06	4.66654e+06	6.67604e+06	3.84355e+06	5.74913e+06	4.22148e+06	4.33827e+06	3.52436e+06	5.54994e+06	4.73634e+06	7.63311e+06	3.06921e+06	3.97354e+06	8.61027e+06	9.08582e+06
Q9DCT8	5	5	256.57	Cysteine-rich protein 2 OS=Mus musculus GN=Crip2 PE=1 SV=1	Crip2	2.28706e+07	2.94615e+07	2.28706e+07	3.66415e+07	1.36707e+07	1.672e+07	1.24696e+07	1.36965e+07	3.95377e+07	5.02878e+07	2.08512e+07	2.85748e+07	1.10369e+07	8.85874e+06	1.70541e+07	2.15167e+07	1.89649e+07	2.63718e+07	2.46679e+07	2.74325e+07	2.4335e+07	2.18711e+07	2.98546e+07	2.94562e+07
Q921M7	5	5	508.72	Protein FAM49B OS=Mus musculus GN=Fam49b PE=1 SV=1	Fam49b	6.67236e+06	9.99894e+06	6.67236e+06	1.15883e+07	7.04576e+06	1.03082e+07	5.82869e+06	6.76058e+06	6.16801e+06	9.94142e+06	5.8984e+06	8.81137e+06	8.24401e+06	7.86806e+06	6.88417e+06	8.77552e+06	6.66418e+06	8.60876e+06	1.05993e+07	1.62973e+07	1.04606e+07	9.98365e+06	1.83773e+07	1.908e+07
Q9Z1G3	5	5	632.32	V-type proton ATPase subunit C 1 OS=Mus musculus GN=Atp6v1c1 PE=1 SV=4	Atp6v1c1	1.323e+07	1.67883e+07	1.323e+07	1.1665e+07	4.37838e+06	1.2843e+07	1.17984e+07	1.26072e+07	1.34046e+07	1.973e+07	1.18751e+07	1.33463e+07	9.00887e+06	1.01197e+07	1.62772e+07	2.17606e+07	9.15019e+06	1.29376e+07	1.52663e+07	2.16351e+07	1.66919e+07	1.57456e+07	2.81121e+07	2.9534e+07
Q8BGS2	5	5	283.86	BolA-like protein 2 OS=Mus musculus GN=Bola2 PE=1 SV=1	Bola2	2.57035e+06	3.13933e+06	2.57035e+06	1.22563e+06	2.45265e+06	2.1134e+06	3.2698e+06	3.74345e+06	707265	1.16729e+06	2.14848e+06	1.54126e+06	2.95813e+06	2.35807e+06	3.50046e+06	9.25096e+06	1.50293e+06	3.18794e+06	6.02968e+06	7.23636e+06	7.69523e+06	1.00866e+07	7.9653e+06	8.81464e+06
Q91Z53	5	5	299.15	Glyoxylate reductase/hydroxypyruvate reductase OS=Mus musculus GN=Grhpr PE=1 SV=1	Grhpr	1.2703e+06	1.62237e+06	1.2703e+06	2.55437e+06	1.70455e+06	2.02416e+06	4.20635e+06	5.01201e+06	1.34053e+06	2.31068e+06	2.2623e+06	3.11382e+06	2.03062e+06	1.93986e+06	3.35117e+06	5.63122e+06	1.53083e+06	2.55822e+06	2.86972e+06	4.87502e+06	3.43244e+06	4.2835e+06	6.2445e+06	7.07151e+06
O35226	5	5	186.59	26S proteasome non-ATPase regulatory subunit 4 OS=Mus musculus GN=Psmd4 PE=1 SV=1	Psmd4	3.12297e+06	4.15957e+06	3.12297e+06	3.40773e+06	2.11422e+06	2.59715e+06	2.474e+06	2.18258e+06	3.49464e+06	5.77505e+06	2.89481e+06	2.93995e+06	1.73332e+06	2.48049e+06	1.31848e+06	2.63753e+06	1.92973e+06	2.6889e+06	2.83828e+06	4.26274e+06	3.07074e+06	3.61358e+06	3.61044e+06	3.97743e+06
P48758	5	5	282.2	Carbonyl reductase [NADPH] 1 OS=Mus musculus GN=Cbr1 PE=1 SV=3	Cbr1	517379	922596	517379	2.8462e+06	999044	2.23426e+06	3.71565e+06	3.75683e+06	1.87182e+06	3.22747e+06	3.89545e+06	3.31588e+06	1.9006e+06	2.42746e+06	3.06221e+06	5.01971e+06	1.90936e+06	3.00562e+06	724430	1.05937e+06	738193	994572	1.07178e+06	922894
Q3U0V1	6	6	351.65	Far upstream element-binding protein 2 OS=Mus musculus GN=Khsrp PE=1 SV=2	Khsrp	1.62035e+06	2.01065e+06	1.62035e+06	2.20135e+06	971655	1.16353e+06	1.97176e+06	1.89586e+06	1.41151e+06	2.56625e+06	2.26731e+06	2.32818e+06	1.1636e+06	783411	1.10279e+06	1.66528e+06	1.4311e+06	2.73261e+06	1.70865e+06	2.67914e+06	1.28363e+06	1.6938e+06	1.9556e+06	2.34613e+06
Q3UYC0	6	6	405.91	Protein phosphatase 1H OS=Mus musculus GN=Ppm1h PE=1 SV=1	Ppm1h	1.42181e+06	2.10524e+06	1.42181e+06	3.1776e+06	2.75627e+06	2.96998e+06	1.9644e+06	2.1435e+06	3.356e+06	5.30865e+06	2.49831e+06	2.50432e+06	3.64369e+06	3.92938e+06	2.96372e+06	3.26721e+06	2.03031e+06	2.55952e+06	2.39473e+06	3.92322e+06	3.82329e+06	3.59126e+06	5.95017e+06	5.73549e+06
P80316	6	5	473.26	T-complex protein 1 subunit epsilon OS=Mus musculus GN=Cct5 PE=1 SV=1	Cct5	1.80423e+06	2.50956e+06	1.80423e+06	4.13178e+06	1.97644e+06	2.55923e+06	2.81554e+06	3.5718e+06	3.93649e+06	4.83504e+06	4.71588e+06	4.53122e+06	2.14554e+06	2.74511e+06	2.42791e+06	3.41601e+06	1.99712e+06	2.58718e+06	4.00996e+06	4.50664e+06	4.87187e+06	4.28749e+06	7.65258e+06	3.49602e+06
P62484	6	6	314.4	Abl interactor 2 OS=Mus musculus GN=Abi2 PE=1 SV=1	Abi2	1.14019e+06	1.60207e+06	1.14019e+06	446194	417756	506940	1.08732e+06	729831	538070	881420	659515	853386	832340	897226	1.07647e+06	1.94301e+06	643859	1.18195e+06	1.02152e+06	1.2983e+06	655821	1.22383e+06	1.01257e+06	872539
Q64737	6	6	318.91	Trifunctional purine biosynthetic protein adenosine-3 OS=Mus musculus GN=Gart PE=1 SV=3	Gart	1.03305e+06	1.27483e+06	1.03305e+06	1.0559e+06	751200	1.04333e+06	667671	799691	475757	846763	1.05345e+06	1.13246e+06	769378	829313	1.13019e+06	1.49041e+06	564466	1.16945e+06	1.35937e+06	2.25968e+06	1.40692e+06	1.48284e+06	2.34109e+06	2.23074e+06
Q9JLM8	6	6	354.63	Serine/threonine-protein kinase DCLK1 OS=Mus musculus GN=Dclk1 PE=1 SV=1	Dclk1	1.41952e+06	1.66936e+06	1.41952e+06	2.16817e+06	1.23138e+06	1.92109e+06	4.08217e+06	4.08099e+06	3.0647e+06	5.74748e+06	1.67462e+06	2.43726e+06	1.61666e+06	1.15573e+06	1.80469e+06	3.50872e+06	979135	1.71093e+06	2.47469e+06	3.0113e+06	3.74913e+06	3.52603e+06	3.21315e+06	4.70423e+06
P47757	6	6	505.59	F-actin-capping protein subunit beta OS=Mus musculus GN=Capzb PE=1 SV=3	Capzb	1.57803e+06	2.33633e+06	1.57803e+06	6.02622e+06	1.33507e+06	1.38376e+06	6.90768e+06	9.29056e+06	1.2725e+07	1.35939e+07	8.3647e+06	6.77503e+06	8.18104e+06	1.04271e+07	1.18615e+07	9.9723e+06	4.72e+06	5.87244e+06	9.5605e+06	6.75302e+06	2.39928e+07	1.14426e+07	1.23554e+07	7.27619e+06
Q8BVQ5	6	6	373.96	Protein phosphatase methylesterase 1 OS=Mus musculus GN=Ppme1 PE=1 SV=5	Ppme1	2.82361e+06	3.93971e+06	2.82361e+06	8.28661e+06	3.99379e+06	5.60996e+06	5.87429e+06	7.05321e+06	6.51856e+06	1.0159e+07	7.90702e+06	9.3745e+06	5.97336e+06	7.40632e+06	5.51553e+06	5.9432e+06	4.48049e+06	7.33547e+06	8.88049e+06	1.31794e+07	9.06972e+06	7.4636e+06	1.26958e+07	1.66925e+07
Q8CHP8	6	6	380.65	Glycerol-3-phosphate phosphatase OS=Mus musculus GN=Pgp PE=1 SV=1	Pgp	1.41312e+06	1.76961e+06	1.41312e+06	807652	978199	1.42875e+06	1.58619e+06	1.97669e+06	1.88974e+06	2.83744e+06	3.17523e+06	3.96007e+06	1.48626e+06	2.35589e+06	1.14307e+06	1.81166e+06	1.17828e+06	1.67058e+06	1.70566e+06	2.54518e+06	4.22337e+06	3.38134e+06	1.74939e+06	337979
P28738	6	6	255.61	Kinesin heavy chain isoform 5C OS=Mus musculus GN=Kif5c PE=1 SV=3	Kif5c	685617	782190	685617	574252	398403	188641	1.14267e+06	1.26882e+06	2.72557e+06	3.93199e+06	1.93917e+06	1.5758e+06	1.23567e+06	1.06389e+06	1.79542e+06	2.23457e+06	960238	1.56622e+06	1.57616e+06	2.0376e+06	2.40136e+06	1.67577e+06	1.87957e+06	1.98904e+06
O88844	6	6	301.14	Isocitrate dehydrogenase [NADP] cytoplasmic OS=Mus musculus GN=Idh1 PE=1 SV=2	Idh1	456159	718452	456159	751047	923341	733500	1.82297e+06	3.11872e+06	3.33286e+06	5.45512e+06	4.03438e+06	4.39123e+06	2.35071e+06	3.48195e+06	3.00153e+06	4.14829e+06	1.56746e+06	3.27119e+06	2.86582e+06	4.72413e+06	3.38102e+06	3.38119e+06	6.97309e+06	7.38624e+06
P57780	6	6	283.9	Alpha-actinin-4 OS=Mus musculus GN=Actn4 PE=1 SV=1	Actn4	704283	797833	704283	1.90846e+06	398801	627356	3.40739e+06	3.76904e+06	2.02476e+06	3.3415e+06	2.32054e+06	3.23758e+06	1.33984e+06	1.47472e+06	1.84231e+06	2.70263e+06	1.64574e+06	2.17969e+06	1.60629e+06	2.36362e+06	2.03519e+06	1.44867e+06	2.64063e+06	2.90914e+06
P68254	5	5	390.42	14-3-3 protein theta OS=Mus musculus GN=Ywhaq PE=1 SV=1	Ywhaq	1.93055e+07	2.16712e+07	1.93055e+07	4.47581e+07	2.28859e+07	2.91173e+07	4.08713e+07	2.81249e+07	4.05813e+07	6.14168e+07	5.30183e+07	4.08723e+07	3.31612e+07	3.50328e+07	4.38898e+07	5.34364e+07	2.27806e+07	4.08338e+07	5.082e+07	5.66234e+07	5.80973e+07	4.52925e+07	6.91009e+07	6.84844e+07
P32848	5	5	361.08	Parvalbumin alpha OS=Mus musculus GN=Pvalb PE=1 SV=3	Pvalb	4.29887e+06	5.60147e+06	4.29887e+06	4.4116e+07	5.5282e+06	5.88326e+06	1.8585e+06	1.26408e+06	4.87524e+06	7.30585e+06	9.59442e+06	1.04917e+07	1.21779e+07	1.43279e+07	1.31483e+07	8.50219e+06	1.17192e+07	1.89631e+07	1.62737e+07	2.29848e+07	1.47873e+07	1.12913e+07	2.84225e+07	3.22452e+07
Q920I9	6	6	200.41	WD repeat-containing protein 7 OS=Mus musculus GN=Wdr7 PE=1 SV=3	Wdr7	1.06248e+06	1.40571e+06	1.06248e+06	1.76309e+06	746853	938825	1.73953e+06	1.61697e+06	2.09942e+06	3.0605e+06	1.80078e+06	1.79388e+06	1.15125e+06	1.789e+06	1.80751e+06	2.7857e+06	1.04494e+06	1.76913e+06	1.81625e+06	2.39652e+06	1.55176e+06	2.09102e+06	3.37178e+06	3.59699e+06
Q9QYC0	6	6	232.63	Alpha-adducin OS=Mus musculus GN=Add1 PE=1 SV=2	Add1	693536	1.11637e+06	693536	2.28674e+06	1.02362e+06	1.11764e+06	296239	670861	1.4032e+06	2.51967e+06	1.42145e+06	1.63502e+06	657975	1.05174e+06	774712	1.07075e+06	674793	1.18343e+06	1.47865e+06	2.70967e+06	1.18422e+06	1.25879e+06	3.02483e+06	3.23586e+06
Q80TZ3	6	6	338.14	Putative tyrosine-protein phosphatase auxilin OS=Mus musculus GN=Dnajc6 PE=1 SV=2	Dnajc6	1.70588e+06	2.63351e+06	1.70588e+06	2.81983e+06	1.39967e+06	1.6076e+06	1.66381e+06	1.42257e+06	681553	1.07636e+06	1.45485e+06	2.04762e+06	1.54479e+06	1.85094e+06	1.63512e+06	767946	1.78301e+06	2.37416e+06	1.0385e+06	1.88515e+06	883094	1.24493e+06	1.96095e+06	2.24288e+06
Q61753	16	16	1134.25	D-3-phosphoglycerate dehydrogenase OS=Mus musculus GN=Phgdh PE=1 SV=3	Phgdh	9.85959e+06	1.35751e+07	9.85959e+06	1.67717e+07	1.05249e+07	1.47389e+07	5.13329e+06	6.05207e+06	6.57839e+06	9.32202e+06	1.11492e+07	1.40885e+07	9.81363e+06	1.08021e+07	1.05964e+07	1.37686e+07	7.73874e+06	1.19929e+07	1.28102e+07	1.8103e+07	1.5144e+07	1.38378e+07	1.96762e+07	2.07117e+07
Q61316	17	17	1181.81	Heat shock 70 kDa protein 4 OS=Mus musculus GN=Hspa4 PE=1 SV=1	Hspa4	7.49025e+06	1.00881e+07	7.49025e+06	1.15595e+07	4.66914e+06	6.28431e+06	1.19529e+07	1.61734e+07	5.11066e+06	9.09104e+06	5.91034e+06	7.99446e+06	8.4071e+06	1.05924e+07	1.2273e+07	1.19173e+07	6.16222e+06	9.47861e+06	1.31768e+07	1.49186e+07	1.96365e+07	1.5799e+07	2.59008e+07	3.24961e+07
P63328	13	12	976.17	Serine/threonine-protein phosphatase 2B catalytic subunit alpha isoform OS=Mus musculus GN=Ppp3ca PE=1 SV=1	Ppp3ca	7.87086e+06	1.06392e+07	7.87086e+06	1.82775e+07	1.14702e+07	1.70669e+07	1.63455e+07	1.44336e+07	1.59256e+07	2.63746e+07	1.64075e+07	2.29054e+07	1.11072e+07	1.40772e+07	1.53937e+07	2.53935e+07	8.38055e+06	1.66212e+07	1.91754e+07	3.12412e+07	2.455e+07	2.40276e+07	3.24885e+07	3.49918e+07
P40142	27	27	2151.38	Transketolase OS=Mus musculus GN=Tkt PE=1 SV=1	Tkt	2.99331e+07	3.68983e+07	2.99331e+07	3.61364e+07	1.84731e+07	2.38321e+07	2.23485e+07	2.19639e+07	2.54464e+07	3.93445e+07	3.01004e+07	3.25984e+07	1.74701e+07	1.3903e+07	1.78048e+07	2.18795e+07	1.34413e+07	2.4369e+07	2.58029e+07	4.22662e+07	2.62181e+07	2.47034e+07	3.70646e+07	5.02554e+07
P05063	27	27	2300.11	Fructose-bisphosphate aldolase C OS=Mus musculus GN=Aldoc PE=1 SV=4	Aldoc	1.45794e+08	2.14075e+08	1.45794e+08	2.32183e+08	1.43728e+08	1.69127e+08	1.44351e+08	1.19055e+08	1.89888e+08	2.63544e+08	2.01548e+08	2.77015e+08	1.4174e+08	1.70373e+08	1.53852e+08	1.40815e+08	1.22211e+08	1.82653e+08	2.11556e+08	2.5197e+08	1.95284e+08	1.82151e+08	3.73139e+08	3.78409e+08
P50516	24	23	2373.84	V-type proton ATPase catalytic subunit A OS=Mus musculus GN=Atp6v1a PE=1 SV=2	Atp6v1a	2.38609e+07	3.03498e+07	2.38609e+07	3.10786e+07	1.95751e+07	2.71205e+07	3.81409e+07	4.00212e+07	6.35397e+07	7.48327e+07	4.55584e+07	5.20764e+07	3.35329e+07	3.82376e+07	4.11897e+07	5.57459e+07	2.87189e+07	3.92169e+07	5.29294e+07	7.20255e+07	5.07528e+07	4.12513e+07	8.18555e+07	8.35392e+07
P17183	25	25	2263.94	Gamma-enolase OS=Mus musculus GN=Eno2 PE=1 SV=2	Eno2	8.34614e+07	1.08853e+08	8.34614e+07	1.63187e+08	1.01199e+08	1.32311e+08	1.76172e+08	1.62809e+08	1.36084e+08	2.02427e+08	1.72996e+08	1.90815e+08	1.09275e+08	1.19276e+08	1.19627e+08	1.33785e+08	9.19698e+07	1.387e+08	1.54787e+08	2.16745e+08	1.71449e+08	1.82488e+08	2.01979e+08	2.30863e+08
P17182	39	39	3658.77	Alpha-enolase OS=Mus musculus GN=Eno1 PE=1 SV=3	Eno1	1.10472e+08	1.67723e+08	1.10472e+08	1.97009e+08	1.79592e+08	1.95725e+08	2.55137e+08	2.36248e+08	1.3077e+08	1.85294e+08	1.84102e+08	2.2707e+08	1.29342e+08	1.77635e+08	1.55233e+08	2.8444e+08	6.9858e+07	1.3558e+08	1.90881e+08	2.97041e+08	2.44012e+08	2.91229e+08	2.46575e+08	3.29023e+08
P20357	36	36	2456.43	Microtubule-associated protein 2 OS=Mus musculus GN=Map2 PE=1 SV=2	Map2	2.11011e+07	2.8548e+07	2.11011e+07	2.48011e+07	1.38835e+07	1.8016e+07	1.51577e+07	1.1373e+07	2.86201e+07	4.61015e+07	2.71118e+07	2.64983e+07	1.48274e+07	2.15231e+07	8.26945e+06	1.43498e+07	1.21416e+07	2.0491e+07	2.19378e+07	2.77884e+07	4.51486e+07	3.86012e+07	1.92668e+07	2.12412e+07
P39053	36	34	2607.36	Dynamin-1 OS=Mus musculus GN=Dnm1 PE=1 SV=2	Dnm1	1.69367e+07	2.27675e+07	1.69367e+07	3.72746e+07	3.95615e+07	3.2524e+07	6.05589e+07	5.97233e+07	5.19074e+07	8.00026e+07	4.61389e+07	5.4189e+07	4.23991e+07	4.96474e+07	5.57466e+07	9.3773e+07	3.04777e+07	4.41545e+07	6.81341e+07	8.72697e+07	7.71992e+07	7.8571e+07	1.19736e+08	1.22373e+08
Q9DBJ1	20	20	1892.45	Phosphoglycerate mutase 1 OS=Mus musculus GN=Pgam1 PE=1 SV=3	Pgam1	1.7448e+08	2.35968e+08	1.7448e+08	2.249e+08	1.36016e+08	1.60244e+08	1.3776e+08	1.99636e+08	1.98944e+08	3.1965e+08	2.13259e+08	2.45877e+08	1.09328e+08	1.94273e+08	1.3341e+08	1.43483e+08	1.09443e+08	1.68661e+08	1.60859e+08	2.28086e+08	1.58264e+08	1.57278e+08	2.32252e+08	2.46351e+08
Q61644	19	19	1347.89	Protein kinase C and casein kinase substrate in neurons protein 1 OS=Mus musculus GN=Pacsin1 PE=1 SV=1	Pacsin1	2.73174e+07	3.50969e+07	2.73174e+07	2.98703e+07	2.40179e+07	2.82008e+07	2.24917e+07	1.86091e+07	2.57022e+07	3.60974e+07	2.62657e+07	3.2743e+07	2.11679e+07	2.4859e+07	2.24822e+07	2.45839e+07	1.6733e+07	2.70115e+07	3.21292e+07	3.96065e+07	3.383e+07	2.40057e+07	5.01198e+07	6.26098e+07
Q8CHC4	22	22	1543.09	Synaptojanin-1 OS=Mus musculus GN=Synj1 PE=1 SV=3	Synj1	1.59552e+07	1.89811e+07	1.59552e+07	3.09346e+07	1.01445e+07	8.88829e+06	1.08472e+07	9.61697e+06	2.70582e+06	4.04824e+06	1.07515e+07	9.15721e+06	1.00092e+07	7.5798e+06	6.87778e+06	1.07465e+07	1.314e+07	1.60283e+07	1.49634e+07	2.0141e+07	1.91932e+07	1.6456e+07	1.89524e+07	2.16756e+07
O08599	21	21	1900.66	Syntaxin-binding protein 1 OS=Mus musculus GN=Stxbp1 PE=1 SV=2	Stxbp1	1.99536e+07	2.91213e+07	1.99536e+07	4.30573e+07	3.2205e+07	4.20294e+07	5.08546e+07	4.78926e+07	4.30202e+07	5.98731e+07	2.40248e+07	5.28785e+07	2.6902e+07	3.0928e+07	4.09933e+07	5.17188e+07	2.23495e+07	3.77624e+07	3.64591e+07	5.26894e+07	5.72038e+07	5.92332e+07	9.79028e+07	1.11632e+08
P60335	9	9	582.88	Poly(rC)-binding protein 1 OS=Mus musculus GN=Pcbp1 PE=1 SV=1	Pcbp1	5.8731e+06	7.93637e+06	5.8731e+06	8.85876e+06	5.55805e+06	7.227e+06	1.34817e+07	1.06138e+07	8.36736e+06	1.30805e+07	1.40427e+07	1.40878e+07	1.61465e+07	1.80987e+07	9.03889e+06	9.1398e+06	6.72267e+06	1.19646e+07	1.88199e+07	2.58039e+07	1.67613e+07	1.46887e+07	1.89863e+07	2.34191e+07
P63011	9	8	561.41	Ras-related protein Rab-3A OS=Mus musculus GN=Rab3a PE=1 SV=1	Rab3a	1.33341e+07	1.91297e+07	1.33341e+07	5.55419e+06	1.14924e+07	1.42365e+07	1.14341e+07	9.50313e+06	4.60021e+06	7.70176e+06	7.52652e+06	8.07326e+06	6.48257e+06	7.55901e+06	7.29015e+06	6.92812e+06	4.41898e+06	6.81006e+06	6.65947e+06	1.07889e+07	8.28686e+06	6.79378e+06	1.50695e+07	1.43841e+07
Q62418	9	8	566.7	Drebrin-like protein OS=Mus musculus GN=Dbnl PE=1 SV=2	Dbnl	3.01726e+06	3.9558e+06	3.01726e+06	4.38188e+06	1.87627e+06	2.43485e+06	1.75418e+06	2.44192e+06	5.65578e+06	8.40287e+06	3.34096e+06	3.95544e+06	3.30009e+06	3.39538e+06	2.87324e+06	4.23349e+06	2.86625e+06	4.83228e+06	4.99139e+06	6.98058e+06	5.75791e+06	4.86635e+06	7.42534e+06	6.93528e+06
Q8R3V5	10	10	761.61	Endophilin-B2 OS=Mus musculus GN=Sh3glb2 PE=1 SV=2	Sh3glb2	2.28964e+06	3.80769e+06	2.28964e+06	5.46732e+06	5.54764e+06	7.59782e+06	9.38979e+06	9.68963e+06	8.63354e+06	1.17664e+07	8.80753e+06	8.72821e+06	6.19522e+06	5.85427e+06	1.0045e+07	1.2551e+07	4.70238e+06	7.41068e+06	1.04234e+07	1.32248e+07	1.00308e+07	9.92251e+06	1.73496e+07	1.92076e+07
Q9D1A2	10	10	485.65	Cytosolic non-specific dipeptidase OS=Mus musculus GN=Cndp2 PE=1 SV=1	Cndp2	2.29338e+06	3.22966e+06	2.29338e+06	4.21478e+06	2.65502e+06	4.32079e+06	5.29081e+06	3.76812e+06	6.05383e+06	9.88044e+06	4.60854e+06	5.73236e+06	3.69905e+06	3.95816e+06	4.26766e+06	6.14556e+06	2.51404e+06	3.94935e+06	5.01089e+06	7.99481e+06	4.85263e+06	4.3966e+06	1.05354e+07	1.16314e+07
P80315	9	8	633.69	T-complex protein 1 subunit delta OS=Mus musculus GN=Cct4 PE=1 SV=3	Cct4	831581	1.33811e+06	831581	2.19298e+06	1.35824e+06	1.87441e+06	4.33034e+06	5.62651e+06	4.39489e+06	4.99301e+06	4.75995e+06	4.26354e+06	3.91468e+06	3.30028e+06	5.14406e+06	8.39402e+06	2.20569e+06	3.31783e+06	7.89443e+06	8.32727e+06	7.90033e+06	6.36807e+06	1.22567e+07	5.83995e+06
O35295	9	8	413.55	Transcriptional activator protein Pur-beta OS=Mus musculus GN=Purb PE=1 SV=3	Purb	908796	1.12668e+06	908796	1.96608e+06	808733	721806	1.09356e+06	1.74661e+06	4.29966e+06	5.46301e+06	4.55889e+06	5.02251e+06	1.43032e+06	2.09371e+06	2.02976e+06	2.44571e+06	2.26603e+06	2.72057e+06	81590.1	113026	288853	296130	78221.9	99040.8
P17427	9	9	642.73	AP-2 complex subunit alpha-2 OS=Mus musculus GN=Ap2a2 PE=1 SV=2	Ap2a2	1.79417e+06	2.43956e+06	1.79417e+06	3.64427e+06	2.12161e+06	2.97359e+06	4.74178e+06	3.40234e+06	4.87946e+06	7.78338e+06	4.33078e+06	5.23993e+06	4.21096e+06	5.57264e+06	7.08523e+06	1.00927e+07	3.15958e+06	5.37599e+06	4.32352e+06	6.58923e+06	6.23617e+06	6.66228e+06	5.66869e+06	6.57092e+06
P24527	9	9	496.33	Leukotriene A-4 hydrolase OS=Mus musculus GN=Lta4h PE=1 SV=4	Lta4h	1.61912e+06	2.8887e+06	1.61912e+06	6.17828e+06	1.23555e+07	2.37424e+06	3.48934e+06	4.03512e+06	3.18639e+06	4.89518e+06	1.91676e+06	2.48303e+06	1.7602e+06	2.20153e+06	1.89294e+06	3.0053e+06	2.44192e+06	1.87256e+06	3.85872e+06	4.3522e+06	3.2695e+06	3.86203e+06	4.92904e+06	5.06385e+06
Q91ZJ5	9	9	542.74	UTP--glucose-1-phosphate uridylyltransferase OS=Mus musculus GN=Ugp2 PE=1 SV=3	Ugp2	684211	899736	684211	619431	28350.5	1.61653e+06	1.43864e+06	1.45999e+06	1.75424e+06	2.46706e+06	1.20176e+06	1.64296e+06	2.47259e+06	3.42837e+06	1.38624e+06	1.0092e+06	737236	1.45291e+06	1.78449e+06	3.12735e+06	3.78971e+06	3.48625e+06	5.13782e+06	4.38113e+06
P14824	9	9	764.08	Annexin A6 OS=Mus musculus GN=Anxa6 PE=1 SV=3	Anxa6	722243	1.40414e+06	722243	3.88244e+06	1.71954e+06	2.54053e+06	2.8e+06	3.0376e+06	5.45647e+06	7.6638e+06	6.92391e+06	7.76182e+06	6.18487e+06	6.84136e+06	7.14222e+06	7.67692e+06	3.88732e+06	5.15802e+06	9.0353e+06	1.09677e+07	7.97418e+06	6.14206e+06	1.75394e+07	1.87707e+07
P12382	9	9	610.07	ATP-dependent 6-phosphofructokinase, liver type OS=Mus musculus GN=Pfkl PE=1 SV=4	Pfkl	1.76635e+06	3.30917e+06	1.76635e+06	6.896e+06	3.27263e+06	2.92939e+06	7.00096e+06	7.38371e+06	1.09121e+07	1.75784e+07	5.93334e+06	9.42535e+06	4.97522e+06	4.16887e+06	5.64465e+06	8.78009e+06	4.37937e+06	8.83387e+06	3.93203e+06	6.97717e+06	3.03569e+06	3.3618e+06	5.37492e+06	7.85679e+06
Q9EQF6	9	9	408.26	Dihydropyrimidinase-related protein 5 OS=Mus musculus GN=Dpysl5 PE=1 SV=1	Dpysl5	7.01577e+06	9.09495e+06	7.01577e+06	9.71549e+06	6.43425e+06	1.06752e+07	1.3592e+07	1.27926e+07	1.1915e+07	1.5891e+07	1.00645e+07	1.12532e+07	9.06444e+06	9.39384e+06	1.14821e+07	5.05157e+06	7.42516e+06	9.71618e+06	1.53734e+07	1.97414e+07	1.83444e+07	1.71211e+07	2.98615e+07	3.10106e+07
P61979	9	9	774.9	Heterogeneous nuclear ribonucleoprotein K OS=Mus musculus GN=Hnrnpk PE=1 SV=1	Hnrnpk	3.10695e+06	3.67473e+06	3.10695e+06	6.80559e+06	2.23466e+06	2.72544e+06	4.72448e+06	3.84886e+06	4.70724e+06	6.67863e+06	7.07958e+06	7.41006e+06	4.66825e+06	5.81514e+06	4.69709e+06	9.82323e+06	3.16603e+06	5.49538e+06	6.55725e+06	1.07131e+07	7.27193e+06	7.24659e+06	1.46118e+07	1.52174e+07
Q60864	11	11	744.56	Stress-induced-phosphoprotein 1 OS=Mus musculus GN=Stip1 PE=1 SV=1	Stip1	1.75112e+07	2.13833e+07	1.75112e+07	2.80563e+07	1.84664e+07	2.08848e+07	2.26115e+07	1.79049e+07	2.88761e+07	4.59424e+07	2.82718e+07	2.94746e+07	2.42746e+07	2.39959e+07	2.47502e+07	2.48896e+07	1.96135e+07	2.65184e+07	3.76529e+07	4.7719e+07	3.20719e+07	2.44675e+07	5.5804e+07	5.66545e+07
Q8C0M9	11	11	692.25	Isoaspartyl peptidase/L-asparaginase OS=Mus musculus GN=Asrgl1 PE=1 SV=1	Asrgl1	3.82072e+06	5.2746e+06	3.82072e+06	8.35746e+06	4.97344e+06	6.18961e+06	5.59905e+06	6.85274e+06	5.28948e+06	8.1671e+06	5.7326e+06	9.10465e+06	4.95551e+06	5.85748e+06	5.15412e+06	6.09425e+06	3.50828e+06	5.43202e+06	1.00988e+07	1.39382e+07	1.06933e+07	1.11096e+07	2.06512e+07	1.94318e+07
P10637	12	12	920.73	Microtubule-associated protein tau OS=Mus musculus GN=Mapt PE=1 SV=3	Mapt	6.839e+06	9.06153e+06	6.839e+06	1.39067e+07	6.17301e+06	9.93465e+06	1.50684e+07	1.94191e+07	1.79179e+07	2.89664e+07	1.24469e+07	1.56032e+07	8.89401e+06	6.99144e+06	1.19024e+07	2.06604e+07	9.55863e+06	1.55932e+07	1.69652e+07	1.9689e+07	1.63297e+07	1.73547e+07	2.08541e+07	2.81058e+07
Q91V12	12	12	933.67	Cytosolic acyl coenzyme A thioester hydrolase OS=Mus musculus GN=Acot7 PE=1 SV=2	Acot7	8.09887e+06	1.0088e+07	8.09887e+06	2.19691e+07	1.16811e+07	1.32661e+07	1.04241e+07	9.31013e+06	1.09131e+07	1.46997e+07	2.06258e+07	1.88037e+07	1.22321e+07	1.06262e+07	1.0273e+07	2.17341e+07	7.366e+06	1.67146e+07	1.68269e+07	2.34475e+07	1.40479e+07	1.49295e+07	3.41052e+07	3.0292e+07
Q9CPY7	12	12	735.39	Cytosol aminopeptidase OS=Mus musculus GN=Lap3 PE=1 SV=3	Lap3	2.65225e+06	3.9525e+06	2.65225e+06	2.50748e+06	1.72948e+06	2.08997e+06	2.17696e+06	2.54196e+06	3.68843e+06	5.20557e+06	2.75234e+06	5.66751e+06	2.69157e+06	3.31243e+06	3.89413e+06	3.63742e+06	2.00037e+06	3.23457e+06	3.69155e+06	5.68568e+06	2.68581e+06	3.39963e+06	8.63107e+06	8.83853e+06
Q61699	12	12	862.33	Heat shock protein 105 kDa OS=Mus musculus GN=Hsph1 PE=1 SV=2	Hsph1	9.47902e+06	1.20777e+07	9.47902e+06	1.29231e+07	7.26541e+06	8.51392e+06	8.3116e+06	5.47922e+06	8.98227e+06	1.15908e+07	1.47959e+07	1.36344e+07	7.74026e+06	8.89068e+06	7.90734e+06	7.31666e+06	6.3434e+06	8.39717e+06	1.27495e+07	1.72976e+07	1.19341e+07	1.00466e+07	1.8074e+07	1.97289e+07
Q64332	10	10	931.82	Synapsin-2 OS=Mus musculus GN=Syn2 PE=1 SV=2	Syn2	9.94274e+06	1.37187e+07	9.94274e+06	5.82898e+06	8.04882e+06	1.11226e+07	1.14943e+07	9.31366e+06	1.90692e+07	2.86897e+07	3.41735e+06	3.38088e+06	5.90943e+06	6.31974e+06	1.04051e+07	6.13392e+06	8.05134e+06	1.09215e+07	9.88643e+06	1.2015e+07	1.05506e+07	1.14656e+07	1.4749e+07	1.27859e+07
Q99LX0	10	10	899.53	Protein deglycase DJ-1 OS=Mus musculus GN=Park7 PE=1 SV=1	Park7	1.09624e+07	1.49125e+07	1.09624e+07	3.65291e+07	2.34384e+07	3.75758e+07	3.84632e+07	4.40315e+07	2.26788e+07	3.70591e+07	3.69457e+07	3.36295e+07	4.51613e+07	5.31407e+07	4.80855e+07	4.67767e+07	1.75145e+07	2.96955e+07	5.7791e+07	8.05769e+07	9.35206e+07	5.90036e+07	1.09049e+08	9.85943e+07
Q9CPU0	10	10	563.27	Lactoylglutathione lyase OS=Mus musculus GN=Glo1 PE=1 SV=3	Glo1	1.12444e+06	1.43916e+06	1.12444e+06	2.01644e+06	2.71324e+06	3.64549e+06	7.34707e+06	8.08088e+06	5.20618e+06	7.40375e+06	8.52008e+06	4.76548e+06	7.41867e+06	7.58229e+06	5.75635e+06	6.13638e+06	3.88513e+06	6.17983e+06	8.31483e+06	8.93181e+06	9.44631e+06	7.96915e+06	1.15461e+07	9.41493e+06
P42932	10	10	666.72	T-complex protein 1 subunit theta OS=Mus musculus GN=Cct8 PE=1 SV=3	Cct8	2.37286e+06	3.39718e+06	2.37286e+06	2.43333e+06	1.50768e+06	1.49314e+06	7.34543e+06	4.56622e+06	2.73089e+06	4.46185e+06	3.8948e+06	5.70812e+06	4.16665e+06	3.30341e+06	4.12014e+06	7.5411e+06	3.16886e+06	5.7998e+06	2.78152e+06	5.53325e+06	3.36915e+06	3.93223e+06	4.93242e+06	5.53695e+06
Q9JII6	11	10	659.98	Alcohol dehydrogenase [NADP(+)] OS=Mus musculus GN=Akr1a1 PE=1 SV=3	Akr1a1	3.65726e+06	5.11993e+06	3.65726e+06	9.62658e+06	6.5057e+06	8.4859e+06	8.37873e+06	7.29921e+06	7.97938e+06	1.32184e+07	1.06175e+07	1.04499e+07	6.37197e+06	9.27493e+06	6.87292e+06	1.09116e+07	5.72103e+06	1.0108e+07	9.75025e+06	1.3108e+07	8.43998e+06	9.27967e+06	1.54656e+07	1.43149e+07
Q9DCX2	3	3	118.86	ATP synthase subunit d, mitochondrial OS=Mus musculus GN=Atp5h PE=1 SV=3	Atp5h	263840	361084	263840	753223	549849	573096	1.03233e+06	836599	2.20521e+06	3.35151e+06	2.51421e+06	3.69102e+06	1.80836e+06	2.11048e+06	1.90451e+06	2.12838e+06	1.49018e+06	2.15906e+06	1.13897e+06	2.09221e+06	1.28209e+06	1.32453e+06	3.2948e+06	3.86447e+06
Q8R164	3	3	107.98	Valacyclovir hydrolase OS=Mus musculus GN=Bphl PE=1 SV=1	Bphl	599904	858889	599904	1.33819e+06	2.25608e+06	2.51936e+06	658331	815553	535368	829797	1.03083e+06	1.46732e+06	1.97046e+06	2.47078e+06	2.0133e+06	3.28331e+06	1.09543e+06	1.7786e+06	2.24954e+06	2.50581e+06	1.49011e+06	1.68287e+06	1.72748e+06	1.19487e+06
Q8BG32	3	3	190.52	26S proteasome non-ATPase regulatory subunit 11 OS=Mus musculus GN=Psmd11 PE=1 SV=3	Psmd11	667932	927152	667932	1.66206e+06	1.02957e+06	1.42192e+06	2.56212e+06	2.55928e+06	1.10522e+06	1.59644e+06	1.47725e+06	1.87045e+06	936952	993706	1.60729e+06	2.34354e+06	622006	1.12963e+06	2.58429e+06	3.65176e+06	2.70434e+06	3.49253e+06	3.50465e+06	4.22604e+06
Q8BJU0	3	3	220.34	Small glutamine-rich tetratricopeptide repeat-containing protein alpha OS=Mus musculus GN=Sgta PE=1 SV=2	Sgta	1.49639e+06	2.124e+06	1.49639e+06	1.58003e+06	1.26633e+06	1.3514e+06	2.6756e+06	3.05641e+06	91270.4	155203	1.55262e+06	1.90669e+06	1.54895e+06	1.02729e+06	1.50132e+06	2.188e+06	1.54264e+06	2.29771e+06	975623	1.62857e+06	1.9447e+06	1.70203e+06	1.17463e+06	1.5047e+06
Q8CHG7	3	3	127.03	Rap guanine nucleotide exchange factor 2 OS=Mus musculus GN=Rapgef2 PE=1 SV=2	Rapgef2	718360	1.00655e+06	718360	822131	802828	692888	965390	584997	534699	867042	157708	181098	624053	566823	878241	1.67097e+06	470608	778053	599668	785732	432961	843271	468692	387282
Q8QZS1	3	3	97.23	3-hydroxyisobutyryl-CoA hydrolase, mitochondrial OS=Mus musculus GN=Hibch PE=1 SV=1	Hibch	396712	584664	396712	363182	255638	383339	401138	463727	829616	1.17588e+06	1.13757e+06	1.27152e+06	315059	421679	389750	285269	178417	344513	1.14992e+06	1.38943e+06	1.13471e+06	1.08815e+06	1.56327e+06	1.80909e+06
Q9D1X0	3	3	139.17	Nucleolar protein 3 OS=Mus musculus GN=Nol3 PE=1 SV=1	Nol3	1.38164e+06	1.84464e+06	1.38164e+06	1.52613e+06	1.37702e+06	1.74291e+06	353925	235258	557980	861757	825748	809055	1.3523e+06	1.75137e+06	1.9272e+06	1.8443e+06	1.13753e+06	1.50599e+06	574829	1.01247e+06	452026	555686	704002	616953
Q3THS6	3	3	184.66	S-adenosylmethionine synthase isoform type-2 OS=Mus musculus GN=Mat2a PE=1 SV=2	Mat2a	819673	1.15201e+06	819673	1.31107e+06	866232	681125	809910	440301	912757	1.58667e+06	1.36584e+06	1.47612e+06	1.19737e+06	1.1584e+06	1.20393e+06	1.99463e+06	1.15844e+06	1.79269e+06	1.42903e+06	2.60322e+06	1.24556e+06	1.69204e+06	2.28626e+06	2.61001e+06
Q9ERK4	3	2	104.55	Exportin-2 OS=Mus musculus GN=Cse1l PE=1 SV=1	Cse1l	13402.6	7956.87	13402.6	323260	160218	82369	372385	301737	498818	645721	842132	540373	383352	341917	521345	623581	219019	324562	594695	553619	531172	520340	554908	416139
P47809	3	3	241.53	Dual specificity mitogen-activated protein kinase kinase 4 OS=Mus musculus GN=Map2k4 PE=1 SV=2	Map2k4	1.93508e+06	2.11153e+06	1.93508e+06	2.32836e+06	1.20998e+06	1.55415e+06	2.39827e+06	3.2593e+06	2.55995e+06	3.74489e+06	3.50185e+06	3.47136e+06	1.96328e+06	1.6586e+06	2.14325e+06	2.65313e+06	1.63859e+06	3.33873e+06	1.96673e+06	2.36377e+06	2.68534e+06	2.11787e+06	3.67993e+06	5.12721e+06
P08228	3	3	153.41	Superoxide dismutase [Cu-Zn] OS=Mus musculus GN=Sod1 PE=1 SV=2	Sod1	2.9598e+06	3.71336e+06	2.9598e+06	7.92873e+06	3.47196e+06	4.25222e+06	1.34325e+07	1.46173e+07	6.85552e+06	1.33969e+07	6.7647e+06	1.2876e+07	6.29137e+06	3.74776e+06	9.63169e+06	1.56013e+07	4.33344e+06	7.56528e+06	1.15557e+07	1.45023e+07	8.83569e+06	1.17475e+07	1.31722e+07	1.62889e+07
P30416	3	3	281.03	Peptidyl-prolyl cis-trans isomerase FKBP4 OS=Mus musculus GN=Fkbp4 PE=1 SV=5	Fkbp4	858029	968093	858029	2.38672e+06	956212	988846	1.64397e+06	1.83489e+06	337189	625075	1.51587e+06	1.87934e+06	879880	769654	1.78116e+06	2.46947e+06	948110	2.26628e+06	1.98096e+06	3.33029e+06	2.35785e+06	3.07494e+06	5.07855e+06	4.74382e+06
Q9CYT6	3	3	280.2	Adenylyl cyclase-associated protein 2 OS=Mus musculus GN=Cap2 PE=1 SV=1	Cap2	2.91153e+06	4.09791e+06	2.91153e+06	6.48531e+06	4.0435e+06	4.29461e+06	5.68335e+06	5.76158e+06	5.85164e+06	9.71932e+06	4.86245e+06	6.1861e+06	3.51306e+06	4.23542e+06	4.02023e+06	6.3509e+06	2.96353e+06	5.92674e+06	3.67638e+06	8.77891e+06	2.36353e+06	3.40089e+06	8.18036e+06	8.49642e+06
Q9CQI3	3	3	217.18	Glia maturation factor beta OS=Mus musculus GN=Gmfb PE=1 SV=3	Gmfb	3.71622e+06	5.10623e+06	3.71622e+06	8.5506e+06	4.97132e+06	4.91421e+06	1.18477e+07	7.01938e+06	5.26018e+06	9.55952e+06	1.19367e+07	1.316e+07	7.35837e+06	6.93089e+06	5.44244e+06	9.89406e+06	3.87935e+06	7.71193e+06	7.27108e+06	1.47334e+07	6.37937e+06	5.96293e+06	1.31515e+07	1.59569e+07
O88448	3	3	131.14	Kinesin light chain 2 OS=Mus musculus GN=Klc2 PE=1 SV=1	Klc2	832040	1.26717e+06	832040	1.15709e+06	604932	757516	1.40235e+06	1.6464e+06	631217	707007	1.4845e+06	1.4428e+06	1.48022e+06	1.17814e+06	1.67348e+06	2.74395e+06	1.13752e+06	1.78631e+06	1.90593e+06	2.99064e+06	1.45724e+06	2.00484e+06	3.04759e+06	3.53122e+06
P12660	3	3	98.19	Purkinje cell protein 2 OS=Mus musculus GN=Pcp2 PE=1 SV=2	Pcp2	128142	146565	128142	7.08344e+06	199990	209775	382615	1.01723e+06	795686	1.48318e+06	3.40886e+06	3.61863e+06	1.90851e+06	2.02744e+06	4.06599e+06	5.76437e+06	2.11925e+06	4.13192e+06	2.99595e+06	4.07339e+06	578362	825017	7.89353e+06	8.30716e+06
P51880	3	3	248.53	Fatty acid-binding protein, brain OS=Mus musculus GN=Fabp7 PE=1 SV=2	Fabp7	1.18906e+06	1.55654e+06	1.18906e+06	3.86061e+06	2.21533e+06	2.50049e+06	8.12494e+06	8.42461e+06	1.76041e+06	3.17073e+06	1.39257e+06	1.59063e+06	3.59476e+06	3.48863e+06	2.81626e+06	5.08005e+06	1.56459e+06	2.57466e+06	5.39774e+06	6.87942e+06	8.70914e+06	9.23881e+06	6.24625e+06	7.34017e+06
P27659	3	3	225.83	60S ribosomal protein L3 OS=Mus musculus GN=Rpl3 PE=1 SV=3	Rpl3	382439	477283	382439	833340	421229	477398	872264	176847	476509	623639	1.01586e+06	455888	221079	289168	45012.8	218237	288757	264585	465912	856398	2.11904e+06	1.60319e+06	290693	513401
Q2PFD7	3	3	109.55	PH and SEC7 domain-containing protein 3 OS=Mus musculus GN=Psd3 PE=1 SV=2	Psd3	1.51466e+06	1.98041e+06	1.51466e+06	1.98227e+06	820540	940440	1.84841e+06	1.20115e+06	1.80529e+06	2.7223e+06	872059	1.61079e+06	218804	163982	408608	616654	216179	289634	534243	504720	1.49828e+06	1.13543e+06	1.34506e+06	1.00269e+06
P47915	3	3	101.37	60S ribosomal protein L29 OS=Mus musculus GN=Rpl29 PE=2 SV=2	Rpl29	723734	828441	723734	20684.6	10275	18813.2	0	0	0	0	0	0	0	0	0	0	0	0	0	0	0	0	0	0
Q01065	3	3	175.28	Calcium/calmodulin-dependent 3',5'-cyclic nucleotide phosphodiesterase 1B OS=Mus musculus GN=Pde1b PE=1 SV=2	Pde1b	1.3859e+06	1.93708e+06	1.3859e+06	3.24601e+06	2.02355e+06	1.87766e+06	1.64496e+06	1.33807e+06	1.61817e+06	2.25263e+06	2.04555e+06	1.98529e+06	665830	1.13296e+06	1.7843e+06	2.16469e+06	1.77902e+06	2.5216e+06	1.77813e+06	2.46855e+06	873003	965878	2.21857e+06	2.02793e+06
Q9DAR7	3	3	105.1	m7GpppX diphosphatase OS=Mus musculus GN=Dcps PE=1 SV=1	Dcps	32949.9	49145.9	32949.9	371378	148244	179350	105837	46257.5	178218	302839	154444	189178	474666	559212	483597	1.11282e+06	205764	418140	475995	832979	368462	657503	808167	680342
Q91VW3	2	2	122.99	SH3 domain-binding glutamic acid-rich-like protein 3 OS=Mus musculus GN=Sh3bgrl3 PE=1 SV=1	Sh3bgrl3	7.46261e+06	9.16713e+06	7.46261e+06	1.13462e+07	9.14136e+06	1.1962e+07	2.03887e+07	1.91713e+07	1.60274e+07	2.86558e+07	2.10001e+07	2.51679e+07	8.57342e+06	1.10666e+07	7.80222e+06	1.3921e+07	5.76882e+06	9.98248e+06	2.51526e+07	3.50295e+07	1.06523e+07	1.18364e+07	4.07828e+07	4.09242e+07
Q8BHN3	3	3	118.24	Neutral alpha-glucosidase AB OS=Mus musculus GN=Ganab PE=1 SV=1	Ganab	188577	251013	188577	333989	203725	169912	1.3687e+06	917468	550158	921176	946024	1.15813e+06	826082	1.12089e+06	1.02664e+06	1.03287e+06	441284	723793	1.46482e+06	1.52644e+06	1.08878e+06	1.12117e+06	2.23635e+06	1.38353e+06
Q148V7	3	3	128.92	LisH domain and HEAT repeat-containing protein KIAA1468 OS=Mus musculus GN=Kiaa1468 PE=1 SV=1	Kiaa1468	334338	378753	334338	657090	243866	281500	695030	699947	468860	911268	294014	520511	372881	328305	485818	920488	296916	491631	393620	688285	600442	689467	867109	692840
P63276	2	2	88.17	40S ribosomal protein S17 OS=Mus musculus GN=Rps17 PE=1 SV=2	Rps17	5.14201e+06	6.44898e+06	5.14201e+06	4.86684e+06	4.82025e+06	5.94015e+06	2.67577e+06	1.97286e+06	2.5758e+06	3.34883e+06	2.45893e+06	2.88695e+06	4.10928e+06	5.78263e+06	2.6985e+06	3.90803e+06	2.85434e+06	3.85895e+06	3.33158e+06	4.87376e+06	3.76166e+06	2.80116e+06	5.8159e+06	9.24082e+06
P15532	2	2	111.18	Nucleoside diphosphate kinase A OS=Mus musculus GN=Nme1 PE=1 SV=1	Nme1	4.17512e+06	5.19738e+06	4.17512e+06	2.54155e+07	1.13294e+07	1.45923e+07	1.14952e+07	9.67506e+06	1.92691e+07	2.66687e+07	1.6506e+07	2.11464e+07	1.68513e+07	2.34175e+07	1.4823e+07	1.89374e+07	1.20157e+07	2.13085e+07	2.78233e+07	3.58815e+07	3.32475e+07	2.67364e+07	4.89154e+07	7.39648e+07
O70161	2	2	117.03	Phosphatidylinositol 4-phosphate 5-kinase type-1 gamma OS=Mus musculus GN=Pip5k1c PE=1 SV=2	Pip5k1c	3.21843e+06	5.70461e+06	3.21843e+06	6.20727e+06	2.99703e+06	3.47307e+06	5.42845e+06	5.27673e+06	4.39979e+06	5.94307e+06	3.51519e+06	5.69198e+06	4.01542e+06	3.90515e+06	6.28404e+06	5.04094e+06	4.32578e+06	5.66574e+06	1.54737e+07	1.51978e+07	1.09689e+07	1.42643e+07	2.56534e+07	2.374e+07
P34884	2	2	198.03	Macrophage migration inhibitory factor OS=Mus musculus GN=Mif PE=1 SV=2	Mif	4.89107e+06	7.73297e+06	4.89107e+06	9.73825e+06	1.09235e+07	1.39547e+07	9.9754e+06	8.58629e+06	3.71576e+06	7.1347e+06	5.98919e+06	5.99173e+06	6.19499e+06	1.00751e+07	9.40507e+06	2.8298e+07	2.96262e+06	6.42362e+06	6.67344e+06	1.13447e+07	7.94205e+06	1.24336e+07	1.59495e+07	1.38257e+07
P16045	2	2	192.44	Galectin-1 OS=Mus musculus GN=Lgals1 PE=1 SV=3	Lgals1	1.20636e+06	1.86673e+06	1.20636e+06	4.44301e+06	6.41564e+06	9.16676e+06	3.23514e+06	324457	1.66454e+06	3.25246e+06	2.25251e+06	3.25626e+06	7.12381e+06	7.321e+06	5.64156e+06	9.47695e+06	2.89297e+06	4.27735e+06	3.66518e+06	1.00477e+07	6.45799e+06	7.40109e+06	1.17951e+07	1.26545e+07
P97825	2	2	116.71	Hematological and neurological expressed 1 protein OS=Mus musculus GN=Hn1 PE=1 SV=3	Hn1	6.17345e+06	8.26497e+06	6.17345e+06	5.35287e+06	5.11293e+06	5.46297e+06	5.02167e+06	3.31493e+06	6.71607e+06	9.76603e+06	5.29596e+06	5.90167e+06	2.97887e+06	3.25626e+06	2.77448e+06	4.58059e+06	3.01857e+06	4.68414e+06	3.90217e+06	5.33004e+06	2.98585e+06	3.41405e+06	5.01928e+06	5.41428e+06
Q9WUK2	2	2	77.98	Eukaryotic translation initiation factor 4H OS=Mus musculus GN=Eif4h PE=1 SV=3	Eif4h	1.80533e+06	3.61677e+06	1.80533e+06	4.00056e+06	1.98033e+06	1.99312e+06	1.89509e+06	1.37742e+06	4.08544e+06	5.2225e+06	5.9514e+06	5.09496e+06	1.38086e+06	2.09897e+06	1.40164e+06	2.05799e+06	1.31657e+06	2.05111e+06	2.79007e+06	3.48179e+06	2.01927e+06	2.70742e+06	3.4047e+06	3.85379e+06
P10639	3	3	119.73	Thioredoxin OS=Mus musculus GN=Txn PE=1 SV=3	Txn	448012	580569	448012	2.09167e+06	192714	2.60197e+06	255111	782509	107238	143858	372828	442927	165809	109957	127759	281648	106500	446339	0	0	0	0	0	0
P35235	3	3	248.62	Tyrosine-protein phosphatase non-receptor type 11 OS=Mus musculus GN=Ptpn11 PE=1 SV=2	Ptpn11	563762	762101	563762	1.09228e+06	627075	416565	462894	389721	1.76353e+06	2.36217e+06	2.45631e+06	2.57819e+06	1.63978e+06	1.69279e+06	1.61287e+06	2.29713e+06	1.81684e+06	2.54341e+06	2.76988e+06	3.20041e+06	1.76508e+06	1.14488e+06	2.87966e+06	3.40866e+06
Q61074	3	3	155.12	Protein phosphatase 1G OS=Mus musculus GN=Ppm1g PE=1 SV=3	Ppm1g	747404	1.20349e+06	747404	353816	471175	257331	14024.6	19803.2	154397	230273	13517.8	167534	169233	257395	193623	103312	81289.5	533998	904130	883098	797970	653459	1.48188e+06	1.22858e+06
Q9DAK9	3	3	227.22	14 kDa phosphohistidine phosphatase OS=Mus musculus GN=Phpt1 PE=1 SV=1	Phpt1	505728	751949	505728	1.69021e+06	707794	671943	810141	673026	779536	1.43373e+06	1.10324e+06	1.55169e+06	1.16512e+06	1.29796e+06	893080	2.07373e+06	1.26862e+06	1.73244e+06	1.73003e+06	2.22954e+06	919493	1.03689e+06	2.35151e+06	2.44423e+06
P53026	3	3	138.73	60S ribosomal protein L10a OS=Mus musculus GN=Rpl10a PE=1 SV=3	Rpl10a	227585	286354	227585	298769	870564	852307	1.2939e+06	1.55673e+06	1.14148e+06	2.21116e+06	1.59924e+06	1.53562e+06	2.03631e+06	2.2687e+06	1.6445e+06	2.30447e+06	1.06189e+06	2.0295e+06	514580	907301	558161	816822	1.38638e+06	1.35103e+06
O70318	3	3	116.52	Band 4.1-like protein 2 OS=Mus musculus GN=Epb41l2 PE=1 SV=2	Epb41l2	529205	583274	529205	496056	456263	547201	162762	201830	333554	345397	362698	263778	425396	471408	364883	566693	448251	806343	473630	1.00069e+06	782709	940059	793829	995746
Q8BJY1	3	3	141.3	26S proteasome non-ATPase regulatory subunit 5 OS=Mus musculus GN=Psmd5 PE=1 SV=4	Psmd5	257913	305352	257913	1.00758e+06	316852	483005	809550	1.12855e+06	1.31241e+06	1.76938e+06	850853	1.01674e+06	1.04203e+06	951138	1.1616e+06	1.26493e+06	538043	1.18251e+06	1.92136e+06	2.95052e+06	2.63935e+06	2.5482e+06	4.03317e+06	3.99616e+06
P16460	3	3	190.54	Argininosuccinate synthase OS=Mus musculus GN=Ass1 PE=1 SV=1	Ass1	239879	419852	239879	899920	466096	627207	1.05453e+06	866112	622518	1.08729e+06	1.09747e+06	1.11967e+06	716745	999820	869397	2.17946e+06	578757	822449	617007	943015	683253	846084	1.09948e+06	966133
Q9DCT1	3	2	143.64	1,5-anhydro-D-fructose reductase OS=Mus musculus GN=Akr1e2 PE=1 SV=1	Akr1e2	42328	3765.04	42328	158655	1057.24	2542.36	0	0	0	0	0	0	122305	113242	147677	155278	224604	311287	0	0	0	0	0	0
Q9Z1N5	3	3	166.26	Spliceosome RNA helicase Ddx39b OS=Mus musculus GN=Ddx39b PE=1 SV=1	Ddx39b	273156	343632	273156	810616	402006	360839	3.35134e+06	1.83889e+06	2.00277e+06	3.28873e+06	1.67262e+06	2.42417e+06	2.33764e+06	2.6347e+06	2.89876e+06	5.39231e+06	1.58462e+06	2.66803e+06	2.37348e+06	4.57545e+06	2.57318e+06	3.21056e+06	6.3132e+06	5.727e+06
Q00915	3	3	185.85	Retinol-binding protein 1 OS=Mus musculus GN=Rbp1 PE=1 SV=2	Rbp1	345361	492467	345361	425522	274982	214811	1.8376e+06	2.35186e+06	1.13737e+06	1.62195e+06	425934	1.02359e+06	1.27855e+06	1.39743e+06	1.30973e+06	2.75417e+06	864958	1.46173e+06	373215	690421	677620	545898	1.35178e+06	1.38343e+06
Q80UP3	3	3	206.57	Diacylglycerol kinase zeta OS=Mus musculus GN=Dgkz PE=1 SV=2	Dgkz	964638	1.07519e+06	964638	1.12482e+06	330534	398042	434597	454127	146671	244406	407942	497083	791438	759559	625720	433820	400555	1.01349e+06	1.33949e+06	1.70565e+06	2.25865e+06	2.03306e+06	1.40437e+06	2.87262e+06
Q00493	3	3	242.16	Carboxypeptidase E OS=Mus musculus GN=Cpe PE=1 SV=2	Cpe	493209	636011	493209	764487	572720	690385	706486	920586	423673	658804	668998	979975	502264	479580	631326	813571	554708	919132	1.42746e+06	2.21328e+06	926691	1.04954e+06	1.89429e+06	1.57996e+06
Q9D8E6	4	4	254.17	60S ribosomal protein L4 OS=Mus musculus GN=Rpl4 PE=1 SV=3	Rpl4	3.43244e+06	3.81849e+06	3.43244e+06	5.6795e+06	2.43994e+06	3.95379e+06	3.72387e+06	4.2807e+06	4.28618e+06	7.20064e+06	4.66301e+06	4.99353e+06	3.35742e+06	3.07312e+06	3.19751e+06	3.5893e+06	2.71573e+06	5.2481e+06	4.35263e+06	6.43678e+06	5.18908e+06	5.79237e+06	5.49026e+06	7.51965e+06
Q9CR16	4	4	241.2	Peptidyl-prolyl cis-trans isomerase D OS=Mus musculus GN=Ppid PE=1 SV=3	Ppid	2.54838e+06	3.13302e+06	2.54838e+06	4.63304e+06	2.22759e+06	3.28164e+06	7.53722e+06	4.36088e+06	4.66599e+06	7.2661e+06	3.93713e+06	4.65168e+06	3.61755e+06	4.35874e+06	3.63448e+06	4.4832e+06	2.41107e+06	4.40423e+06	3.99592e+06	6.10729e+06	5.27383e+06	6.3341e+06	1.16695e+07	1.12784e+07
Q80TL0	4	4	271.12	Protein phosphatase 1E OS=Mus musculus GN=Ppm1e PE=1 SV=2	Ppm1e	5.67725e+06	7.15072e+06	5.67725e+06	6.64749e+06	6.94439e+06	8.97119e+06	9.35502e+06	7.69045e+06	9.38765e+06	1.34121e+07	5.01395e+06	9.42907e+06	8.52865e+06	8.56591e+06	7.89543e+06	9.4186e+06	6.45532e+06	9.25783e+06	1.21734e+07	1.84432e+07	1.18478e+07	1.48339e+07	1.3778e+07	1.36788e+07
O08997	4	4	273.11	Copper transport protein ATOX1 OS=Mus musculus GN=Atox1 PE=1 SV=1	Atox1	2.41263e+06	3.51416e+06	2.41263e+06	3.70371e+06	3.43454e+06	3.75899e+06	1.12357e+07	1.02984e+07	4.64334e+06	8.59027e+06	4.85369e+06	5.66979e+06	4.56579e+06	4.6395e+06	5.67652e+06	1.49555e+07	2.96744e+06	5.99042e+06	5.78605e+06	7.77636e+06	7.18688e+06	9.11149e+06	9.63105e+06	8.47762e+06
P56376	4	4	175.02	Acylphosphatase-1 OS=Mus musculus GN=Acyp1 PE=1 SV=2	Acyp1	1.68332e+06	2.39844e+06	1.68332e+06	2.31077e+06	1.52048e+06	1.80257e+06	1.8127e+06	2.01075e+06	2.47283e+06	3.71508e+06	3.90228e+06	3.5387e+06	1.78204e+06	2.18347e+06	1.92022e+06	2.02214e+06	535482	2.29211e+06	432514	653287	583216	387024	1.09981e+06	1.50037e+06
P70333	4	4	130.65	Heterogeneous nuclear ribonucleoprotein H2 OS=Mus musculus GN=Hnrnph2 PE=1 SV=1	Hnrnph2	2.56858e+06	3.53738e+06	2.56858e+06	3.7721e+06	1.69744e+06	2.09031e+06	2.20293e+06	2.37245e+06	3.43082e+06	4.65676e+06	3.71686e+06	3.76901e+06	1.84146e+06	1.88178e+06	2.40784e+06	2.0111e+06	1.74469e+06	3.00327e+06	2.89249e+06	3.72862e+06	2.69999e+06	2.59189e+06	4.77378e+06	5.5933e+06
Q68FL4	4	4	261.78	Putative adenosylhomocysteinase 3 OS=Mus musculus GN=Ahcyl2 PE=1 SV=1	Ahcyl2	967707	1.14361e+06	967707	1.70097e+06	984100	1.27286e+06	292656	144309	600.028	0	46647.3	70376.9	464939	1.01461e+06	183693	57859.4	395132	446722	697666	928810	612170	382655	995370	1.86783e+06
P62827	4	4	261.91	GTP-binding nuclear protein Ran OS=Mus musculus GN=Ran PE=1 SV=3	Ran	1.63519e+06	2.27669e+06	1.63519e+06	1.53662e+06	1.7494e+06	2.50685e+06	2.86429e+06	2.7498e+06	1.68399e+06	3.30665e+06	815792	876625	1.45421e+06	1.82857e+06	2.60141e+06	4.26085e+06	1.24205e+06	2.14352e+06	4.92616e+06	7.23436e+06	5.30802e+06	4.87981e+06	8.76338e+06	1.149e+07
P57776	4	4	325.41	Elongation factor 1-delta OS=Mus musculus GN=Eef1d PE=1 SV=3	Eef1d	1.74487e+06	1.92384e+06	1.74487e+06	1.99504e+06	1.29277e+06	1.67839e+06	1.68036e+06	2.16827e+06	264903	319218	1.49306e+06	2.33228e+06	1.61746e+06	1.32625e+06	1.01328e+06	916082	1.3104e+06	1.85747e+06	1.57773e+06	2.19141e+06	2.27511e+06	2.00732e+06	2.44317e+06	3.42643e+06
Q9CRB6	4	4	305.8	Tubulin polymerization-promoting protein family member 3 OS=Mus musculus GN=Tppp3 PE=1 SV=1	Tppp3	1.17159e+06	1.62592e+06	1.17159e+06	1.94653e+06	1.19352e+06	1.20115e+06	2.41063e+06	2.52848e+06	2.46684e+06	3.35082e+06	2.36e+06	2.77189e+06	1.55551e+06	1.80338e+06	1.27739e+06	2.30308e+06	1.40524e+06	2.45077e+06	1.59235e+06	2.59308e+06	1.67594e+06	2.17511e+06	3.83346e+06	4.26348e+06
P63242	4	4	258.17	Eukaryotic translation initiation factor 5A-1 OS=Mus musculus GN=Eif5a PE=1 SV=2	Eif5a	708590	908960	708590	960273	868716	1.30122e+06	1.46175e+06	1.0751e+06	659715	1.26399e+06	1.10523e+06	1.01297e+06	1.32579e+06	1.4792e+06	1.82282e+06	1.91421e+06	724944	1.07806e+06	961651	1.52282e+06	959752	892083	2.1284e+06	2.36676e+06
Q8VED9	4	4	367.39	Galectin-related protein OS=Mus musculus GN=Lgalsl PE=1 SV=1	Lgalsl	637419	862039	637419	1.34346e+06	1.11332e+06	1.37813e+06	1.7393e+06	1.37349e+06	751810	1.30243e+06	856714	1.4645e+06	1.25411e+06	1.34728e+06	1.60472e+06	3.34225e+06	639207	1.22335e+06	1.28691e+06	2.47921e+06	1.23364e+06	1.84075e+06	2.29842e+06	2.50391e+06
Q9D358	4	4	273.83	Low molecular weight phosphotyrosine protein phosphatase OS=Mus musculus GN=Acp1 PE=1 SV=3	Acp1	1.01017e+06	1.40922e+06	1.01017e+06	1.82339e+06	1.09665e+06	1.64017e+06	715802	517196	149278	264250	953272	1.46579e+06	547969	399236	464086	314536	444918	729345	1.00447e+06	1.25683e+06	756733	1.03591e+06	712437	1.19908e+06
P84099	4	4	234.48	60S ribosomal protein L19 OS=Mus musculus GN=Rpl19 PE=1 SV=1	Rpl19	1.63159e+06	2.42007e+06	1.63159e+06	1.79917e+06	1.27017e+06	1.80625e+06	1.07415e+06	1.91095e+06	1.18261e+06	1.4874e+06	1.6723e+06	2.08504e+06	1.33752e+06	1.64339e+06	687460	760123	1.10985e+06	1.63473e+06	993592	1.44395e+06	1.99868e+06	1.70614e+06	1.90565e+06	2.12208e+06
Q99J08	5	5	201.91	SEC14-like protein 2 OS=Mus musculus GN=Sec14l2 PE=1 SV=1	Sec14l2	1.14228e+06	1.5215e+06	1.14228e+06	628170	920396	990030	1.10005e+06	693710	1.76865e+06	2.26595e+06	925849	2.12973e+06	1.98157e+06	2.19567e+06	1.69893e+06	641889	1.72484e+06	2.14749e+06	1.34504e+06	2.0293e+06	960262	900782	2.30959e+06	2.72969e+06
Q8K2T1	5	4	172.5	NmrA-like family domain-containing protein 1 OS=Mus musculus GN=Nmral1 PE=1 SV=1	Nmral1	299120	285471	299120	654422	426111	485619	773205	968283	104719	206712	943417	1.10814e+06	336332	293552	443126	531664	196233	383898	160252	205729	105522	147500	73370.1	29804.5
Q9CX34	5	5	278.2	Protein SGT1 homolog OS=Mus musculus GN=Sugt1 PE=1 SV=3	Sugt1	989046	1.51525e+06	989046	1.2157e+06	1.06029e+06	1.06484e+06	2.29566e+06	2.0748e+06	2.15284e+06	2.89525e+06	2.51471e+06	1.69296e+06	1.15503e+06	1.77796e+06	1.28576e+06	2.42497e+06	902307	1.9283e+06	1.68689e+06	2.36295e+06	1.91089e+06	2.63119e+06	2.60334e+06	3.1176e+06
Q9Z0S1	5	5	404.19	3'(2'),5'-bisphosphate nucleotidase 1 OS=Mus musculus GN=Bpnt1 PE=1 SV=2	Bpnt1	1.30655e+06	1.99835e+06	1.30655e+06	4.64537e+06	3.02639e+06	3.2686e+06	2.04227e+06	3.03012e+06	1.98768e+06	3.65456e+06	2.61826e+06	3.25221e+06	2.32989e+06	3.92352e+06	2.92624e+06	5.54237e+06	1.895e+06	3.49422e+06	3.66124e+06	3.80268e+06	2.84e+06	2.70636e+06	5.12791e+06	6.21076e+06
Q8R0A7	5	5	224.28	Uncharacterized protein KIAA0513 OS=Mus musculus GN=Kiaa0513 PE=1 SV=1	Kiaa0513	840392	1.1333e+06	840392	784136	752856	696178	1.42131e+06	1.44645e+06	380302	444621	645297	1.08906e+06	397261	463414	539064	663204	263771	576724	214066	615587	807094	709083	747192	850937
Q8K354	5	5	318.99	Carbonyl reductase [NADPH] 3 OS=Mus musculus GN=Cbr3 PE=1 SV=1	Cbr3	667743	1.07296e+06	667743	1.33916e+06	764671	822757	1.8407e+06	2.12331e+06	1.63704e+06	2.32033e+06	2.38618e+06	2.90844e+06	479718	578199	542451	1.10268e+06	594197	1.00462e+06	646103	1.30327e+06	1.35774e+06	1.17658e+06	655734	1.0722e+06
Q64467	4	4	262.2	Glyceraldehyde-3-phosphate dehydrogenase, testis-specific OS=Mus musculus GN=Gapdhs PE=1 SV=1	Gapdhs	5.29367e+06	7.00669e+06	5.29367e+06	2.96051e+07	7.03866e+06	9.03605e+06	1.87428e+07	1.96172e+07	2.62615e+07	4.00247e+07	3.33549e+07	4.31963e+07	0	0	0	0	0	0	3.37342e+07	4.10966e+07	1.67095e+07	1.58024e+07	3.58495e+07	3.95517e+07
Q8K010	5	5	271.16	5-oxoprolinase OS=Mus musculus GN=Oplah PE=1 SV=1	Oplah	243958	257643	243958	804584	309658	280922	766331	823881	1.5902e+06	2.25891e+06	742556	1.4219e+06	334168	464016	673081	880345	371305	844312	360131	353571	233527	251314	683845	728519
Q9D7X3	4	4	375.77	Dual specificity protein phosphatase 3 OS=Mus musculus GN=Dusp3 PE=1 SV=1	Dusp3	3.72886e+06	5.42892e+06	3.72886e+06	5.83999e+06	4.99614e+06	6.41852e+06	1.00609e+07	1.02493e+07	5.32977e+06	7.94948e+06	7.00498e+06	7.07608e+06	4.62403e+06	5.81042e+06	7.66221e+06	1.07903e+07	2.84649e+06	6.03473e+06	8.06025e+06	1.33629e+07	8.8566e+06	9.8467e+06	1.01138e+07	1.05909e+07
P62631	4	4	378.94	Elongation factor 1-alpha 2 OS=Mus musculus GN=Eef1a2 PE=1 SV=1	Eef1a2	2.20268e+07	2.8118e+07	2.20268e+07	1.20746e+07	2.49237e+07	2.6546e+07	2.51003e+07	2.61518e+07	3.83025e+07	4.67864e+07	4.39731e+07	4.51488e+07	2.92932e+07	3.89356e+07	2.26338e+07	3.72444e+07	2.22894e+07	3.57138e+07	3.83727e+07	5.21582e+07	3.15542e+07	3.35052e+07	7.93484e+07	1.18137e+08
Q8K183	5	5	261.75	Pyridoxal kinase OS=Mus musculus GN=Pdxk PE=1 SV=1	Pdxk	634543	1.20613e+06	634543	266635	857653	1.00257e+06	477446	585652	1.15535e+06	1.98338e+06	775839	1.04193e+06	493982	764645	955488	1.22652e+06	497769	834691	822219	1.34578e+06	1.23324e+06	1.31555e+06	1.64343e+06	1.69391e+06
Q91VI7	5	5	282.95	Ribonuclease inhibitor OS=Mus musculus GN=Rnh1 PE=1 SV=1	Rnh1	3.86032e+06	4.76798e+06	3.86032e+06	3.08916e+06	1.33771e+06	4.487e+06	98158.4	635541	2.2635e+06	2.75857e+06	4.18953e+06	3.2681e+06	2.82973e+06	3.7468e+06	2.45661e+06	4.18943e+06	2.10235e+06	3.54246e+06	4.21473e+06	6.15967e+06	6.17484e+06	4.59008e+06	5.45245e+06	6.11236e+06
P05201	5	5	340.95	Aspartate aminotransferase, cytoplasmic OS=Mus musculus GN=Got1 PE=1 SV=3	Got1	2.47554e+06	3.14098e+06	2.47554e+06	4.65077e+06	2.88277e+06	2.79096e+06	2.6476e+06	3.49845e+06	1.09354e+07	1.50578e+07	6.94798e+06	7.62667e+06	3.55263e+06	4.62888e+06	1.42184e+07	1.26435e+07	3.29164e+06	4.58979e+06	4.82237e+06	6.39292e+06	5.87129e+06	5.08358e+06	2.55925e+07	2.35289e+07
P17156	5	5	291.03	Heat shock-related 70 kDa protein 2 OS=Mus musculus GN=Hspa2 PE=1 SV=2	Hspa2	1.35659e+06	1.61555e+06	1.35659e+06	1.23373e+06	1.02409e+06	1.32163e+06	1.59387e+06	701401	1.49752e+06	2.1557e+06	1.22176e+06	1.35495e+06	619870	465764	645757	1.2584e+06	611242	849918	565875	711735	694738	745676	1.04436e+06	1.1654e+06
Q8VCW8	4	4	223.56	Acyl-CoA synthetase family member 2, mitochondrial OS=Mus musculus GN=Acsf2 PE=1 SV=1	Acsf2	2.53771e+06	3.0109e+06	2.53771e+06	2.04177e+06	2.40273e+06	2.51001e+06	2.70357e+06	2.53997e+06	1.5559e+06	2.4161e+06	2.79641e+06	3.52572e+06	2.83894e+06	2.81778e+06	2.68619e+06	1.12921e+06	2.04043e+06	3.36617e+06	2.45044e+06	4.13665e+06	1.8927e+06	1.80226e+06	4.42731e+06	3.69124e+06
P97355	4	4	136.46	Spermine synthase OS=Mus musculus GN=Sms PE=1 SV=1	Sms	883408	1.15649e+06	883408	426991	241471	347411	0	0	0	0	0	0	850640	1.65691e+06	1.56406e+06	309094	1.02625e+06	1.58098e+06	1.06968e+06	1.16904e+06	1.35323e+06	847811	931811	234190
O55143	4	4	165.46	Sarcoplasmic/endoplasmic reticulum calcium ATPase 2 OS=Mus musculus GN=Atp2a2 PE=1 SV=2	Atp2a2	671169	850284	671169	2.57536e+06	1.61852e+06	3.12526e+06	5.08209e+06	4.60698e+06	1.9666e+06	3.61275e+06	1.59976e+06	2.46034e+06	2.28305e+06	2.73846e+06	2.57101e+06	4.29594e+06	1.27026e+06	2.16697e+06	3.44227e+06	5.88691e+06	5.07509e+06	5.01393e+06	6.65582e+06	7.94967e+06
P63054	3	3	302.78	Purkinje cell protein 4 OS=Mus musculus GN=Pcp4 PE=3 SV=2	Pcp4	3.72016e+06	4.75859e+06	3.72016e+06	3.638e+06	1.00326e+06	619553	964897	1.14156e+06	1.28565e+06	1.93827e+06	1.42497e+06	2.12501e+06	753592	1.34147e+06	989907	1.04915e+06	1.4904e+06	2.5474e+06	2.36747e+06	3.42275e+06	612022	922881	1.89396e+06	2.69537e+06
Q9EPW0	4	4	147.58	Type I inositol 3,4-bisphosphate 4-phosphatase OS=Mus musculus GN=Inpp4a PE=1 SV=1	Inpp4a	135090	196331	135090	750642	292100	336683	916378	1.59764e+06	627424	1.26448e+06	609420	721463	484889	318616	692145	1.76616e+06	398187	772111	991641	1.29113e+06	669470	1.24773e+06	1.08281e+06	1.3857e+06
Q8R0H9	4	4	169.82	ADP-ribosylation factor-binding protein GGA1 OS=Mus musculus GN=Gga1 PE=1 SV=1	Gga1	357812	483911	357812	420974	72790.2	154189	816361	699977	1.59094e+06	2.51315e+06	798138	984028	519876	683581	473771	136392	585488	709701	1.21821e+06	1.559e+06	1.8569e+06	1.64028e+06	457452	81741.8
Q9JKB1	4	4	269.24	Ubiquitin carboxyl-terminal hydrolase isozyme L3 OS=Mus musculus GN=Uchl3 PE=1 SV=2	Uchl3	359787	508206	359787	859483	1.14747e+06	488348	2.31112e+06	1.99089e+06	2.56075e+06	4.44493e+06	2.95688e+06	3.5432e+06	1.38847e+06	2.03063e+06	1.87913e+06	2.59982e+06	1.251e+06	2.26791e+06	2.2541e+06	2.67783e+06	2.9815e+06	1.913e+06	4.56962e+06	6.09692e+06
Q9EPN1	4	4	158.24	Neurobeachin OS=Mus musculus GN=Nbea PE=1 SV=1	Nbea	2.33046e+06	3.109e+06	2.33046e+06	1.55689e+06	1.0859e+06	794882	2.41454e+06	1.8306e+06	4.5875e+06	6.37813e+06	3.10002e+06	3.93633e+06	1.81923e+06	1.64635e+06	2.5826e+06	3.04738e+06	2.17628e+06	3.25357e+06	3.6975e+06	4.55612e+06	2.466e+06	1.92605e+06	4.92343e+06	4.94596e+06
P23116	4	4	162.08	Eukaryotic translation initiation factor 3 subunit A OS=Mus musculus GN=Eif3a PE=1 SV=5	Eif3a	505002	598605	505002	1.25998e+06	1.66481e+06	1.23042e+06	232939	242776	187490	264978	297820	335162	1.24834e+06	2.30797e+06	1.679e+06	3.43998e+06	658627	885641	1.23587e+06	2.00611e+06	2.78828e+06	3.58231e+06	2.90548e+06	3.43134e+06
P45376	4	4	148.01	Aldose reductase OS=Mus musculus GN=Akr1b1 PE=1 SV=3	Akr1b1	705795	818724	705795	3.17372e+06	1.13658e+06	1.19278e+06	2.80829e+06	3.26202e+06	4.39357e+06	7.11677e+06	3.46897e+06	4.17765e+06	1.59128e+06	1.19717e+06	2.38909e+06	4.43197e+06	1.55136e+06	2.71671e+06	2.42528e+06	2.94781e+06	1.68714e+06	2.30867e+06	3.21568e+06	3.96771e+06
Q9CQ60	4	4	235.77	6-phosphogluconolactonase OS=Mus musculus GN=Pgls PE=1 SV=1	Pgls	2.50128e+06	3.4963e+06	2.50128e+06	3.99389e+06	1.87295e+06	2.27802e+06	4.64267e+06	3.88275e+06	4.01985e+06	5.42264e+06	3.98033e+06	2.83473e+06	3.06948e+06	3.01226e+06	3.65567e+06	3.66934e+06	1.8464e+06	3.13675e+06	3.00038e+06	4.09384e+06	7.11228e+06	4.04403e+06	5.4346e+06	5.80117e+06
Q923D2	4	4	316.76	Flavin reductase (NADPH) OS=Mus musculus GN=Blvrb PE=1 SV=3	Blvrb	560919	659016	560919	5.03862e+06	428366	562527	752680	897554	108602	130019	1.77651e+06	1.74823e+06	5.70635e+06	1.0401e+07	9.62015e+06	1.57494e+07	5.26902e+06	7.58904e+06	5.56627e+06	5.96574e+06	1.44339e+07	1.51077e+07	3.18524e+06	2.53707e+06
P60469	4	4	225.9	Liprin-alpha-3 OS=Mus musculus GN=Ppfia3 PE=1 SV=2	Ppfia3	1.11217e+06	1.55719e+06	1.11217e+06	1.63658e+06	1.46735e+06	2.18368e+06	4.48417e+06	4.27689e+06	2.75511e+06	3.57397e+06	3.19228e+06	3.37099e+06	2.09534e+06	2.69319e+06	2.07077e+06	2.43858e+06	1.62568e+06	2.86426e+06	2.23908e+06	3.59169e+06	2.79827e+06	2.75082e+06	3.86196e+06	6.19379e+06
P35980	4	4	310.07	60S ribosomal protein L18 OS=Mus musculus GN=Rpl18 PE=1 SV=3	Rpl18	1.81884e+06	1.8917e+06	1.81884e+06	836909	357684	742156	1.10409e+06	1.57612e+06	951151	1.4367e+06	1.43058e+06	1.50134e+06	876314	1.31631e+06	1.35782e+06	1.49964e+06	711307	946338	601886	1.19908e+06	1.18117e+06	1.40711e+06	1.76356e+06	2.68054e+06
Q60668	4	3	290.34	Heterogeneous nuclear ribonucleoprotein D0 OS=Mus musculus GN=Hnrnpd PE=1 SV=2	Hnrnpd	612021	890454	612021	4.55101e+06	1.09315e+06	805869	2.27163e+06	2.23736e+06	690740	723653	3.00131e+06	3.37979e+06	2.38857e+06	2.29841e+06	2.70305e+06	3.99992e+06	1.83905e+06	3.54516e+06	2.62178e+06	4.37786e+06	3.03222e+06	2.63873e+06	7.38458e+06	8.31883e+06
Q64514	4	4	181.99	Tripeptidyl-peptidase 2 OS=Mus musculus GN=Tpp2 PE=1 SV=3	Tpp2	2.72116e+06	3.40101e+06	2.72116e+06	1.95329e+06	1.0169e+06	1.00741e+06	186890	476101	1.44594e+06	1.73798e+06	815151	514551	423172	673426	860540	955268	486697	668739	842758	770438	1.06809e+06	673763	1.30106e+06	686379
P97351	4	4	225.83	40S ribosomal protein S3a OS=Mus musculus GN=Rps3a PE=1 SV=3	Rps3a	376781	513731	376781	1.23086e+06	597931	787424	972655	1.06771e+06	394690	740536	876431	1.16937e+06	1.52931e+06	2.01502e+06	1.72234e+06	2.03727e+06	1.07049e+06	2.05123e+06	1.57797e+06	2.66192e+06	1.85313e+06	1.98813e+06	2.63717e+06	3.02802e+06
Q8R574	4	4	243.36	Phosphoribosyl pyrophosphate synthase-associated protein 2 OS=Mus musculus GN=Prpsap2 PE=1 SV=1	Prpsap2	942572	1.22526e+06	942572	2.42243e+06	1.38153e+06	1.50912e+06	1.93766e+06	3.22986e+06	4.13875e+06	4.95578e+06	3.8042e+06	3.6612e+06	2.94493e+06	3.04386e+06	5.33001e+06	5.61134e+06	2.34338e+06	2.67337e+06	2.73676e+06	3.24696e+06	3.8822e+06	3.35783e+06	7.36557e+06	2.25478e+06
Q9WUL7	4	4	279.54	ADP-ribosylation factor-like protein 3 OS=Mus musculus GN=Arl3 PE=1 SV=1	Arl3	719724	954863	719724	1.3843e+06	774191	1.39456e+06	1.69581e+06	1.70123e+06	1.62241e+06	2.76586e+06	656063	1.44352e+06	1.96585e+06	2.31982e+06	2.28477e+06	2.34546e+06	1.26512e+06	2.04514e+06	1.86663e+06	2.6905e+06	2.79185e+06	2.65785e+06	4.45371e+06	3.70101e+06
Q9Z204	2	2	65.34	Heterogeneous nuclear ribonucleoproteins C1/C2 OS=Mus musculus GN=Hnrnpc PE=1 SV=1	Hnrnpc	0	0	0	0	0	0	13699.2	5017.54	75593.7	76247.8	3333.81	8404.83	0	0	0	0	0	0	215712	209045	88871.6	131853	289670	278681
Q91YM2	2	2	70.28	Rho GTPase-activating protein 35 OS=Mus musculus GN=Arhgap35 PE=1 SV=3	Arhgap35	0	0	0	0	0	0	18466.2	33482.3	114611	164094	12467.7	17052.4	0	0	0	0	0	0	0	0	0	0	0	0
Q9QZE5	2	2	94.54	Coatomer subunit gamma-1 OS=Mus musculus GN=Copg1 PE=1 SV=1	Copg1	0	0	0	0	0	0	2590.61	9191.47	238343	322782	0	6632.93	0	0	0	0	0	0	0	0	0	0	0	0
Q9DCC4	2	2	66.94	Pyrroline-5-carboxylate reductase 3 OS=Mus musculus GN=Pycrl PE=1 SV=2	Pycrl	0	0	0	0	0	0	102685	48942	296699	373156	520321	612496	438948	465681	909486	1.93968e+06	378870	712847	498577	489900	327125	430833	940079	911406
Q9D7M1	2	2	101.2	Glucose-induced degradation protein 8 homolog OS=Mus musculus GN=Gid8 PE=1 SV=1	Gid8	0	0	0	0	0	0	83009.5	19354	25998.9	98168.5	58675.4	42659.4	92515.3	188685	84665	126285	38849.5	90791	55538.1	18889.2	4941.11	12760.1	79654.3	52232.7
P62849	2	2	70.97	40S ribosomal protein S24 OS=Mus musculus GN=Rps24 PE=1 SV=1	Rps24	0	0	0	0	0	0	24686.3	7875.42	9974.26	121336	250910	229570	133890	274566	222061	322763	50560.7	113107	139941	215841	180785	37221.4	823269	1.15724e+06
Q8BL80	1	1	18.27	Rho GTPase-activating protein 22 OS=Mus musculus GN=Arhgap22 PE=1 SV=2	Arhgap22	0	0	0	0	0	0	4.40208e+06	9.11626e+07	4.78371e+07	7.83849e+07	5.28331e+07	6.57747e+07	0	0	0	0	0	0	0	0	0	0	0	0
Q01405	2	2	51.68	Protein transport protein Sec23A OS=Mus musculus GN=Sec23a PE=1 SV=2	Sec23a	0	0	0	0	0	0	485164	232745	789594	763591	870931	994867	257032	362624	288547	504499	202435	433122	3.34555e+06	4.92703e+06	5.22852e+06	3.47121e+06	3.18731e+06	895274
Q60960	2	2	41.9	Importin subunit alpha-5 OS=Mus musculus GN=Kpna1 PE=1 SV=2	Kpna1	0	0	0	0	0	0	188492	193299	576080	752599	390024	234564	196982	400344	438479	447731	307352	449712	0	0	0	0	0	0
Q3TGW2	1	1	16.27	Endonuclease/exonuclease/phosphatase family domain-containing protein 1 OS=Mus musculus GN=Eepd1 PE=1 SV=1	Eepd1	0	0	0	0	0	0	3.36227e+06	2.4677e+06	2.04872e+06	4.25536e+06	1.54093e+06	2.00976e+06	468436	268399	587097	1.13052e+06	232373	384656	653345	1.0108e+06	565896	2.16391e+06	888405	1.15626e+06
Q9CR51	1	1	19.16	V-type proton ATPase subunit G 1 OS=Mus musculus GN=Atp6v1g1 PE=1 SV=3	Atp6v1g1	0	0	0	0	0	0	847058	881582	1.71324e+06	2.4049e+06	6.43404e+06	5.59157e+06	1.18459e+06	2.21042e+06	341722	205278	735840	1.17158e+06	0	0	0	0	0	0
P17563	1	1	60.58	Selenium-binding protein 1 OS=Mus musculus GN=Selenbp1 PE=1 SV=2	Selenbp1	0	0	0	0	0	0	1.13364e+06	552046	380630	805960	599109	694678	619748	641802	969688	1.87859e+06	224768	582537	768553	1.08552e+06	844958	1.01545e+06	1.65721e+06	1.48849e+06
O08579	1	1	51.6	Emerin OS=Mus musculus GN=Emd PE=1 SV=1	Emd	0	0	0	0	0	0	650278	888854	929079	1.79665e+06	723782	1.30652e+06	547916	574216	357231	759945	421390	591075	0	0	0	0	0	0
Q9D6Y9	1	1	123.56	1,4-alpha-glucan-branching enzyme OS=Mus musculus GN=Gbe1 PE=1 SV=1	Gbe1	0	0	0	0	0	0	422317	445796	396957	500567	165118	454111	282051	358208	371608	636826	153137	454903	250876	466310	258185	522162	986333	834162
Q9JII5	1	1	26.57	DAZ-associated protein 1 OS=Mus musculus GN=Dazap1 PE=1 SV=2	Dazap1	0	0	0	0	0	0	816352	915146	3.03953e+06	4.22367e+06	1.05926e+06	2.06669e+06	1.20703e+06	772094	1.46524e+06	2.03424e+06	1.70076e+06	2.06127e+06	275361	313439	158466	248983	357795	204835
Q8BVV7	1	1	22.62	Centrosomal protein of 95 kDa OS=Mus musculus GN=Cep95 PE=1 SV=2	Cep95	0	0	0	0	0	0	5.13326e+06	3.8189e+06	415317	801470	2.0744e+06	2.46799e+06	818791	924205	866015	1.95857e+06	923001	982226	0	0	0	0	0	0
P60840	1	1	73.1	Alpha-endosulfine OS=Mus musculus GN=Ensa PE=1 SV=1	Ensa	0	0	0	0	0	0	977220	1.37723e+06	1.05625e+06	1.95181e+06	1.2025e+06	1.79205e+06	1.70767e+06	750826	1.74597e+06	2.51369e+06	1.98995e+06	3.55051e+06	3.15025e+06	4.36115e+06	681156	1.35838e+06	4.08537e+06	4.3446e+06
O54829	1	1	72.28	Regulator of G-protein signaling 7 OS=Mus musculus GN=Rgs7 PE=1 SV=2	Rgs7	0	0	0	0	0	0	2.42323e+06	1.92338e+06	1.68726e+06	3.00973e+06	1.93213e+06	2.12682e+06	192727	150581	201717	550494	258317	425866	47009.5	196592	82070	210929	104722	248408
Q80VD1	2	2	74.69	Protein FAM98B OS=Mus musculus GN=Fam98b PE=1 SV=1	Fam98b	0	0	0	0	0	0	1.2392e+06	533482	446839	856370	426684	959308	987532	1.27834e+06	1.12968e+06	3.02577e+06	392974	939143	1.3945e+06	1.50325e+06	1.1311e+06	1.55306e+06	1.96948e+06	1.30439e+06
P08551	2	2	88.95	Neurofilament light polypeptide OS=Mus musculus GN=Nefl PE=1 SV=5	Nefl	0	0	0	0	0	0	1.02385e+06	213232	1.12957e+06	1.92049e+06	132759	466556	0	0	0	0	0	0	0	0	0	0	0	0
O35841	2	2	70.77	Apoptosis inhibitor 5 OS=Mus musculus GN=Api5 PE=1 SV=2	Api5	0	0	0	0	0	0	260699	85846.3	875925	843399	1.48588e+06	781631	801081	519637	879358	521036	870030	1.15858e+06	1.87276e+06	1.13035e+06	1.69258e+06	1.54426e+06	1.07811e+06	34101.7
Q99KK7	2	2	159.84	Dipeptidyl peptidase 3 OS=Mus musculus GN=Dpp3 PE=1 SV=2	Dpp3	0	0	0	0	0	0	2.90526e+06	1.48541e+06	1.67609e+06	2.3835e+06	660689	2.4793e+06	1.19962e+06	1.63971e+06	2.00908e+06	1.41645e+06	936537	1.20652e+06	1.62175e+06	2.61634e+06	2.95349e+06	2.60539e+06	3.18747e+06	2.96501e+06
Q91XL9	2	2	77.26	Oxysterol-binding protein-related protein 1 OS=Mus musculus GN=Osbpl1a PE=1 SV=2	Osbpl1a	0	0	0	0	0	0	74371.4	304577	440561	623480	188012	556478	1.80347e+06	2.97103e+06	1.74167e+06	3.23595e+06	1.46151e+06	2.38494e+06	5.69144e+06	7.00911e+06	5.68031e+06	5.36073e+06	8.05818e+06	9.71274e+06
Q8BTI8	2	2	66.03	Serine/arginine repetitive matrix protein 2 OS=Mus musculus GN=Srrm2 PE=1 SV=3	Srrm2	0	0	0	0	0	0	283715	257597	441661	631001	485448	567619	452486	473454	238063	361010	427224	728046	444904	906300	679393	785200	839601	1.06985e+06
Q6NVF9	2	2	160.93	Cleavage and polyadenylation specificity factor subunit 6 OS=Mus musculus GN=Cpsf6 PE=1 SV=1	Cpsf6	0	0	0	0	0	0	295526	797346	1.34738e+06	1.6448e+06	658231	646999	864305	1.19954e+06	1.76483e+06	2.06583e+06	764316	1.02463e+06	1.48196e+06	1.36111e+06	2.44698e+06	1.51229e+06	2.59656e+06	1.78074e+06
Q3UEB3	2	2	101.6	Poly(U)-binding-splicing factor PUF60 OS=Mus musculus GN=Puf60 PE=1 SV=2	Puf60	0	0	0	0	0	0	2.06845e+06	686071	1.0878e+06	1.95244e+06	1.33152e+06	1.56381e+06	1.09917e+06	1.41222e+06	1.04362e+06	1.58774e+06	1.16314e+06	1.60983e+06	758952	1.19181e+06	560517	594566	1.3869e+06	2.36046e+06
Q9D7V2	2	2	105.24	LysM and putative peptidoglycan-binding domain-containing protein 2 OS=Mus musculus GN=Lysmd2 PE=1 SV=2	Lysmd2	0	0	0	0	0	0	410925	681247	357034	519866	329197	570059	0	0	0	0	0	0	616975	919572	1.28687e+06	756635	619132	923227
Q8VCR7	2	2	53.06	Protein ABHD14B OS=Mus musculus GN=Abhd14b PE=1 SV=1	Abhd14b	0	0	0	0	0	0	184901	216242	470425	624121	449682	549261	201379	480582	289830	487200	261534	430374	338530	455652	130576	263297	307947	499346
Q6NZL0	2	2	127.58	Protein SOGA3 OS=Mus musculus GN=Soga3 PE=1 SV=2	Soga3	0	0	0	0	0	0	349707	8783.19	239440	449423	180668	238716	191787	75986.9	183881	445148	102119	169703	255010	400092	277993	320823	378112	279817
Q5SVL6	2	2	97.27	Rap1 GTPase-activating protein 2 OS=Mus musculus GN=Rap1gap2 PE=1 SV=1	Rap1gap2	0	0	0	0	0	0	236185	314377	620727	880553	92082.7	400487	397743	370666	391336	360632	283531	491918	0	0	0	0	0	0
Q8BFY9	2	2	117.6	Transportin-1 OS=Mus musculus GN=Tnpo1 PE=1 SV=2	Tnpo1	0	0	0	0	0	0	572973	410879	185188	323231	339345	324860	0	0	0	0	0	0	57918.2	319315	36237.3	70395.8	101951	136225
P42859	2	2	53.04	Huntingtin OS=Mus musculus GN=Htt PE=1 SV=2	Htt	0	0	0	0	0	0	309461	422873	210787	405291	24934.4	120311	847322	666720	1.11261e+06	2.31156e+06	502198	747770	1.13015e+06	878920	918407	1.6711e+06	2.91347e+06	3.63944e+06
Q8BG18	1	1	21.16	N-terminal EF-hand calcium-binding protein 1 OS=Mus musculus GN=Necab1 PE=1 SV=1	Necab1	0	0	0	0	0	0	167260	244213	50847.7	104912	7802.67	27117.6	398709	382663	651416	596819	313355	342527	914664	854553	576197	503093	1.86522e+06	1.28598e+06
Q91YD9	1	1	20.97	Neural Wiskott-Aldrich syndrome protein OS=Mus musculus GN=Wasl PE=1 SV=1	Wasl	0	0	0	0	0	0	4134.35	506.034	59477	106955	0	0	360961	548374	789310	1.80322e+06	280271	498131	72459.3	903045	1.03602e+06	1.06744e+06	1.35638e+06	1.57522e+06
Q91X52	1	1	116.22	L-xylulose reductase OS=Mus musculus GN=Dcxr PE=1 SV=2	Dcxr	0	0	0	0	0	0	440734	321915	744582	714114	1.41351e+06	971226	637952	478257	962018	1.29224e+06	489121	451426	916609	624920	1.46771e+06	1.1518e+06	974286	47727.3
Q8C0S4	1	1	24.99	Tetratricopeptide repeat protein 21A OS=Mus musculus GN=Ttc21a PE=1 SV=2	Ttc21a	0	0	0	0	0	0	499949	31187.8	522.896	7046.04	250019	39414.3	296624	220735	517101	1.01556e+06	121615	222524	652347	569281	531452	985563	898411	1.26015e+06
Q9CZS1	1	1	29.35	Aldehyde dehydrogenase X, mitochondrial OS=Mus musculus GN=Aldh1b1 PE=1 SV=1	Aldh1b1	0	0	0	0	0	0	139327	51179.6	343850	683282	449965	348752	49963.8	35772.2	47820.5	69783.7	123733	189857	0	0	0	0	0	0
P56564	1	1	111.03	Excitatory amino acid transporter 1 OS=Mus musculus GN=Slc1a3 PE=1 SV=2	Slc1a3	0	0	0	0	0	0	227909	100642	364427	498829	257747	399705	14152.5	21532.9	11652.1	1.15176e+06	16632.4	27031	687498	1.00131e+06	676887	793392	166814	1611.22
P69566	1	1	70.88	Ran-binding protein 9 OS=Mus musculus GN=Ranbp9 PE=1 SV=1	Ranbp9	0	0	0	0	0	0	9020.05	1545.23	321450	74048.1	5479.23	37663.6	129891	107068	211869	245520	137963	310443	353990	547333	395451	161657	454063	586782
Q99KH8	1	1	66.6	Serine/threonine-protein kinase 24 OS=Mus musculus GN=Stk24 PE=1 SV=1	Stk24	0	0	0	0	0	0	3211.58	238780	282451	40513.5	8208.16	10660.8	224421	202350	241330	405522	153538	218187	128449	228977	252095	205093	529588	517765
Q8VH51	1	1	22.9	RNA-binding protein 39 OS=Mus musculus GN=Rbm39 PE=1 SV=2	Rbm39	0	0	0	0	0	0	146551	120480	188320	355579	109437	95071.7	146296	185977	146558	125869	121095	165483	179175	509424	291172	356053	684378	651816
Q9D0J4	1	1	128.66	ADP-ribosylation factor-like protein 2 OS=Mus musculus GN=Arl2 PE=1 SV=1	Arl2	0	0	0	0	0	0	449716	108658	842530	880247	769380	138843	594304	645097	457661	153515	191621	229409	670630	564917	1.95154e+06	617387	358338	161396
E9Q401	1	1	29.78	Ryanodine receptor 2 OS=Mus musculus GN=Ryr2 PE=1 SV=1	Ryr2	0	0	0	0	0	0	18926.9	30532.3	123543	273905	0	0	0	0	0	0	0	0	0	0	0	0	0	0
Q8BW75	1	1	24.54	Amine oxidase [flavin-containing] B OS=Mus musculus GN=Maob PE=1 SV=4	Maob	0	0	0	0	0	0	140476	89809.2	2170.97	38753.5	318668	181147	0	0	0	0	0	0	0	0	0	0	0	0
Q8C7E9	1	1	32.94	Cleavage stimulation factor subunit 2 tau variant OS=Mus musculus GN=Cstf2t PE=1 SV=2	Cstf2t	0	0	0	0	0	0	436021	352126	1.01412e+06	1.02061e+06	825736	215271	0	0	0	0	0	0	0	0	0	0	0	0
P70290	1	1	43.55	55 kDa erythrocyte membrane protein OS=Mus musculus GN=Mpp1 PE=1 SV=1	Mpp1	0	0	0	0	0	0	189360	0	0	153732	18684.8	73203.2	197602	224734	251129	605438	38148.7	58073.8	180223	286638	134694	142181	265133	238123
Q8BHW2	1	1	30.3	Protein OSCP1 OS=Mus musculus GN=Oscp1 PE=1 SV=1	Oscp1	0	0	0	0	0	0	5214.79	120325	676420	1.04287e+06	472064	523050	736079	903620	1.14313e+06	1.08794e+06	200476	542333	675489	1.41812e+06	1.46853e+06	1.27751e+06	2.0512e+06	2.68774e+06
Q9EPK7	1	1	27.76	Exportin-7 OS=Mus musculus GN=Xpo7 PE=1 SV=3	Xpo7	0	0	0	0	0	0	1.10412e+06	589427	123068	113412	1.44692e+06	1.09026e+06	645543	936930	809549	1.15177e+06	808724	1.3318e+06	115824	1.00118e+06	534745	659275	1.2252e+06	483020
Q8CC86	1	1	32.61	Nicotinate phosphoribosyltransferase OS=Mus musculus GN=Naprt PE=1 SV=1	Naprt	0	0	0	0	0	0	219191	241427	548144	596412	878592	116629	0	0	0	0	0	0	0	0	0	0	0	0
Q8C6G8	1	1	77.36	WD repeat-containing protein 26 OS=Mus musculus GN=Wdr26 PE=1 SV=3	Wdr26	0	0	0	0	0	0	42321.7	59752	334981	501827	182346	46121.5	388876	17624.1	262129	30289.8	138384	408691	0	0	0	0	0	0
Q80XK6	1	1	54.8	Autophagy-related protein 2 homolog B OS=Mus musculus GN=Atg2b PE=1 SV=3	Atg2b	0	0	0	0	0	0	14187.5	58975	407339	741112	47795.7	86633.8	0	0	0	0	0	0	0	0	0	0	0	0
Q8BTZ7	1	1	21.77	Mannose-1-phosphate guanyltransferase beta OS=Mus musculus GN=Gmppb PE=1 SV=1	Gmppb	0	0	0	0	0	0	4274.15	35739.6	474710	725797	263960	341336	310191	213122	336547	202497	344794	541429	305699	91724.1	20217.4	50329.6	519791	602546
D3YVF0	1	1	22.88	A-kinase anchor protein 5 OS=Mus musculus GN=Akap5 PE=1 SV=2	Akap5	0	0	0	0	0	0	729099	842413	379024	396564	4990.04	90886.6	119398	56680.1	268772	349997	295045	568811	906687	1.0731e+06	1.15709e+06	919581	1.33874e+06	1.78062e+06
P46660	1	1	67.19	Alpha-internexin OS=Mus musculus GN=Ina PE=1 SV=3	Ina	0	0	0	0	0	0	3217.37	4312.77	57119.8	100984	19782.9	0	169557	152501	72093.7	62066.4	5539.49	186100	404810	401412	472377	543501	309726	378066
P51163	1	1	60.22	Uroporphyrinogen-III synthase OS=Mus musculus GN=Uros PE=1 SV=1	Uros	0	0	0	0	0	0	182289	161616	792192	1.41576e+06	1.08186e+06	1.28079e+06	837752	1.23993e+06	750295	947703	492769	1.00581e+06	0	0	0	0	0	0
B2RSH2	1	1	99.11	Guanine nucleotide-binding protein G(i) subunit alpha-1 OS=Mus musculus GN=Gnai1 PE=1 SV=1	Gnai1	0	0	0	0	0	0	17473.4	33696.2	7942.11	9580.5	148073	210568	112356	205765	176648	62106	133604	193429	161093	205972	257916	283108	189526	95414.5
P97384	1	1	20.63	Annexin A11 OS=Mus musculus GN=Anxa11 PE=1 SV=2	Anxa11	0	0	0	0	0	0	14037	2741.51	8586.68	15399.2	406999	259022	0	0	0	0	0	0	0	0	0	0	0	0
Q5XG69	1	1	24.72	Soluble lamin-associated protein of 75 kDa OS=Mus musculus GN=Fam169a PE=1 SV=3	Fam169a	0	0	0	0	0	0	460089	0	0	0.246946	0	1659.11	0	0	0	0	0	0	0	0	0	0	0	0
P50544	1	1	55.12	Very long-chain specific acyl-CoA dehydrogenase, mitochondrial OS=Mus musculus GN=Acadvl PE=1 SV=3	Acadvl	0	0	0	0	0	0	233949	16709	93569.7	159153	3902.61	91083.7	313097	349726	476007	409998	154910	238269	310279	606396	430716	378441	1.43501e+06	1.32062e+06
Q9D883	1	1	32.92	Splicing factor U2AF 35 kDa subunit OS=Mus musculus GN=U2af1 PE=1 SV=4	U2af1	0	0	0	0	0	0	0	1004.16	0	6597.33	48262.1	71305.9	1152.99	489.183	0	467.661	7341.57	19965.2	0	0	0	0	0	0
Q8QZY1	1	1	38.18	Eukaryotic translation initiation factor 3 subunit L OS=Mus musculus GN=Eif3l PE=1 SV=1	Eif3l	0	0	0	0	0	0	137250	199856	8640.41	13551.4	39873.8	3976.15	320314	343159	337657	409516	205416	366467	0	0	0	0	0	0
Q99020	1	1	27.34	Heterogeneous nuclear ribonucleoprotein A/B OS=Mus musculus GN=Hnrnpab PE=1 SV=1	Hnrnpab	0	0	0	0	0	0	0	0	908.705	0	135808	115134	0	0	0	0	0	0	112633	160616	14699.3	7340.85	164071	126431
Q9EP69	1	1	38.02	Phosphatidylinositide phosphatase SAC1 OS=Mus musculus GN=Sacm1l PE=1 SV=1	Sacm1l	0	0	0	0	0	0	4084.97	4133.89	39014.6	833.26	2003.97	1706.08	0	0	0	0	0	0	0	0	0	0	0	0
Q8VHC3	1	1	44.11	Selenoprotein M OS=Mus musculus GN=Selm PE=1 SV=3	Selm	0	0	0	0	0	0	0	0	0	0	9393.05	0	0	0	0	0	0	0	0	0	0	0	0	0
Q8C6I2	1	1	23.53	Succinate dehydrogenase assembly factor 2, mitochondrial OS=Mus musculus GN=Sdhaf2 PE=1 SV=1	Sdhaf2	0	0	0	0	0	0	11832.8	26562.5	0	8142.14	153576	82044.7	177426	228775	196894	560999	67476.8	134124	94978.5	229302	19976.7	92906.1	130591	283616
Q8QZT2	1	1	36.15	Centriole, cilia and spindle-associated protein OS=Mus musculus GN=Ccsap PE=1 SV=1	Ccsap	0	0	0	0	0	0	939133	988.698	10690.2	4420.56	237378	4704.34	0	0	0	0	0	0	194207	2178.13	1.17076e+06	529769	14368.7	3839.82
P47941	1	1	24.46	Crk-like protein OS=Mus musculus GN=Crkl PE=1 SV=2	Crkl	0	0	0	0	0	0	7497.14	0	0	559.492	138334	80829.7	0	0	0	0	0	0	0	0	0	0	0	0
Q8K0T4	1	1	29.16	Katanin p60 ATPase-containing subunit A-like 1 OS=Mus musculus GN=Katnal1 PE=1 SV=1	Katnal1	0	0	0	0	0	0	0	0	37253.2	0	0	0	13197.4	37871.4	9581.21	24255.9	23936.7	26642.6	0	0	0	0	0	0
Q8BH69	1	1	19.12	Selenide, water dikinase 1 OS=Mus musculus GN=Sephs1 PE=1 SV=1	Sephs1	0	0	0	0	0	0	3585.91	87958.5	10249.2	1714.57	108971	20222.2	0	0	0	0	0	0	0	0	0	0	0	0
Q9CQC7	1	1	35.33	NADH dehydrogenase [ubiquinone] 1 beta subcomplex subunit 4 OS=Mus musculus GN=Ndufb4 PE=1 SV=3	Ndufb4	0	0	0	0	0	0	0	350.172	0	0	119641	0	0	0	0	0	0	0	0	0	0	0	0	0
Q9CQA6	1	1	40.97	Coiled-coil-helix-coiled-coil-helix domain-containing protein 1 OS=Mus musculus GN=Chchd1 PE=1 SV=1	Chchd1	0	0	0	0	0	0	31014.9	26732.4	156075	156558	40917.9	73400.3	0	0	0	0	0	0	0	0	0	0	0	0
Q8VDN4	1	1	32.67	Coiled-coil domain-containing protein 92 OS=Mus musculus GN=Ccdc92 PE=1 SV=1	Ccdc92	0	0	0	0	0	0	10747.1	5110.29	64959.4	92522.6	475.547	2331.03	234060	260755	357294	580294	87704.3	271958	354308	228962	141648	242827	196002	220403
Q9D071	1	1	37.85	MMS19 nucleotide excision repair protein homolog OS=Mus musculus GN=Mms19 PE=1 SV=1	Mms19	0	0	0	0	0	0	64206.5	16259.8	118826	239603	97460.5	12653	0	0	0	0	0	0	0	0	0	0	0	0
Q5SVR0	1	1	22.32	TBC1 domain family member 9B OS=Mus musculus GN=Tbc1d9b PE=1 SV=1	Tbc1d9b	0	0	0	0	0	0	174108	50953.5	332930	312490	870942	385843	0	0	0	0	0	0	0	0	0	0	0	0
P56380	1	1	22.3	Bis(5'-nucleosyl)-tetraphosphatase [asymmetrical] OS=Mus musculus GN=Nudt2 PE=1 SV=3	Nudt2	0	0	0	0	0	0	1501.68	18630.7	0	0	83505.2	8977.76	38445.9	5843.52	70469.2	11196.5	24313.3	34994.3	213366	265949	58716.8	27836.3	243899	194217
Q5U3K5	1	1	41.04	Rab-like protein 6 OS=Mus musculus GN=Rabl6 PE=1 SV=2	Rabl6	0	0	0	0	0	0	28192.6	9023.85	388580	563517	627204	400477	164815	330156	324418	893146	410684	807420	736668	1.273e+06	360742	195260	861001	201243
Q9DCB4	1	1	57.8	cAMP-regulated phosphoprotein 21 OS=Mus musculus GN=Arpp21 PE=1 SV=2	Arpp21	0	0	0	0	0	0	9101.7	3888.16	322092	111745	2889	7406.13	0	1828.14	75.1505	73852.9	97330.3	81221.9	0	0	0	0	0	0
P56389	1	1	59.06	Cytidine deaminase OS=Mus musculus GN=Cda PE=1 SV=2	Cda	0	0	0	0	0	0	28187.6	23690.7	0	47019.2	491602	646455	0	0	0	0	0	0	50735.8	99861.7	170760	6690.77	267964	403301
Q8K021	1	1	48.34	Secretory carrier-associated membrane protein 1 OS=Mus musculus GN=Scamp1 PE=1 SV=1	Scamp1	0	0	0	0	0	0	321100	303670	711.149	193.688	10046.7	16376.6	430423	564660	510897	527484	312491	717908	0	0	0	0	0	0
Q3UM18	1	1	15.79	Large subunit GTPase 1 homolog OS=Mus musculus GN=Lsg1 PE=1 SV=2	Lsg1	0	0	0	0	0	0	7651.21	92645	303867	331045	6359.87	139581	129079	111542	302671	405322	11124.4	49241.2	0	0	0	0	0	0
P97823	1	1	33.27	Acyl-protein thioesterase 1 OS=Mus musculus GN=Lypla1 PE=1 SV=1	Lypla1	0	0	0	0	0	0	1.28213e+06	1.1088e+06	877173	1.41125e+06	785025	1.35145e+06	1.00418e+06	865054	1.52311e+06	1.43608e+06	711796	737193	2.57492e+06	3.15443e+06	1.92207e+06	1.62041e+06	5.68941e+06	5.6339e+06
P26369	1	1	23	Splicing factor U2AF 65 kDa subunit OS=Mus musculus GN=U2af2 PE=1 SV=3	U2af2	0	0	0	0	0	0	288368	138495	228117	495959	234040	489145	195629	212974	135881	416744	282099	404627	0	0	0	0	0	0
P56959	1	1	41.44	RNA-binding protein FUS OS=Mus musculus GN=Fus PE=1 SV=1	Fus	0	0	0	0	0	0	319929	513797	2.23427e+06	3.0087e+06	1.58209e+06	1.47228e+06	612275	897894	1.37325e+06	1.50096e+06	1.09561e+06	1.84245e+06	1.7768e+06	2.52334e+06	1.2659e+06	1.14383e+06	3.21472e+06	3.22877e+06
Q3THG9	1	1	27.63	Alanyl-tRNA editing protein Aarsd1 OS=Mus musculus GN=Aarsd1 PE=1 SV=2	Aarsd1	0	0	0	0	0	0	773937	623294	345337	532543	1.06892e+06	1.26896e+06	209185	175028	172686	185714	384405	505982	754960	1.18501e+06	787854	972357	591847	682404
P61148	1	1	29.71	Fibroblast growth factor 1 OS=Mus musculus GN=Fgf1 PE=1 SV=1	Fgf1	0	0	0	0	0	0	1382.19	10378.9	0	0	461056	446079	62882	48595.3	55682.6	149703	64770.9	81114.3	199275	304757	173763	235694	460494	451669
Q80UJ7	1	1	38.9	Rab3 GTPase-activating protein catalytic subunit OS=Mus musculus GN=Rab3gap1 PE=1 SV=4	Rab3gap1	0	0	0	0	0	0	1.97503e+06	1.63016e+06	1.70142e+06	2.47254e+06	1.22356e+06	1.0664e+06	751575	1.2665e+06	1.01099e+06	1.70989e+06	514596	1.08074e+06	1.75038e+06	3.33526e+06	1.60485e+06	2.24157e+06	2.4262e+06	2.87584e+06
Q8K3C3	1	1	22.1	Protein LZIC OS=Mus musculus GN=Lzic PE=1 SV=1	Lzic	0	0	0	0	0	0	629040	78481	744707	1.05473e+06	520426	999698	0	0	0	0	0	0	0	0	0	0	0	0
Q9QYX7	1	1	80.19	Protein piccolo OS=Mus musculus GN=Pclo PE=1 SV=4	Pclo	0	0	0	0	0	0	660312	229671	533317	1.22229e+06	548471	606010	0	0	0	0	0	0	0	0	0	0	0	0
P36993	1	1	60.1	Protein phosphatase 1B OS=Mus musculus GN=Ppm1b PE=1 SV=1	Ppm1b	0	0	0	0	0	0	9640.96	12683.7	135148	225832	130259	152065	0	0	0	0	0	0	363086	595401	165048	63615.1	238856	359748
Q6ZQ58	1	1	33.12	La-related protein 1 OS=Mus musculus GN=Larp1 PE=1 SV=3	Larp1	0	0	0	0	0	0	336255	152646	535787	703569	429842	342187	109473	90368.9	126898	66218.3	91598.7	227934	257662	588254	182098	278769	91785.1	167368
Q6URW6	1	1	41.05	Myosin-14 OS=Mus musculus GN=Myh14 PE=1 SV=1	Myh14	0	0	0	0	0	0	646026	702191	317507	722306	41265.9	321178	407802	394296	448112	833536	196333	332222	812482	1.12769e+06	585116	1.21597e+06	969363	1.30249e+06
P61028	1	1	29.22	Ras-related protein Rab-8B OS=Mus musculus GN=Rab8b PE=1 SV=1	Rab8b	0	0	0	0	0	0	86180.5	138964	510153	869033	52216.8	356578	0	0	0	0	0	0	0	0	0	0	0	0
Q9R061	1	1	30.66	Cytosolic Fe-S cluster assembly factor NUBP2 OS=Mus musculus GN=Nubp2 PE=1 SV=1	Nubp2	0	0	0	0	0	0	105410	216592	283937	660560	393923	63702.6	0	0	0	0	0	0	0	0	0	0	0	0
Q8VD33	1	1	42.69	Small glutamine-rich tetratricopeptide repeat-containing protein beta OS=Mus musculus GN=Sgtb PE=1 SV=1	Sgtb	0	0	0	0	0	0	5488.33	11647.4	333666	637523	62656.4	406461	335424	519085	177383	678016	256549	325293	591806	949093	397291	210416	1.26033e+06	1.72632e+06
Q9Z0P4	1	1	23.09	Paralemmin-1 OS=Mus musculus GN=Palm PE=1 SV=1	Palm	0	0	0	0	0	0	12127.5	27373.8	489162	721036	52377.4	100163	167047	99205	110716	231959	145409	234686	68121.3	237667	83480.9	88096.6	66800.4	194713
Q0GNC1	1	1	43.08	Inverted formin-2 OS=Mus musculus GN=Inf2 PE=1 SV=1	Inf2	0	0	0	0	0	0	407617	190682	465181	770794	523631	702866	272911	280635	256732	129375	250134	401450	0	0	0	0	0	0
O70250	1	1	59.56	Phosphoglycerate mutase 2 OS=Mus musculus GN=Pgam2 PE=1 SV=3	Pgam2	0	0	0	0	0	0	121389	951106	722815	1.11964e+06	353700	128581	10168.1	35873.9	172677	89455.6	7337.32	223051	0	0	0	0	0	0
Q8BFY6	1	1	71.09	Peflin OS=Mus musculus GN=Pef1 PE=1 SV=1	Pef1	0	0	0	0	0	0	33916.9	458671	533615	801015	4608.08	51604.9	0	0	0	0	0	0	1.21537e+06	1.01567e+06	161443	150477	1.14788e+06	210008
P59108	1	1	47.3	Copine-2 OS=Mus musculus GN=Cpne2 PE=1 SV=1	Cpne2	0	0	0	0	0	0	57394.6	208692	1.23763e+06	1.61195e+06	156311	196762	412976	511310	1.31522e+06	220799	628884	637094	0	0	0	0	0	0
Q8VCA8	1	1	21.18	Secernin-2 OS=Mus musculus GN=Scrn2 PE=1 SV=1	Scrn2	0	0	0	0	0	0	324546	225576	296522	488256	297398	326577	0	0	0	0	0	0	0	0	0	0	0	0
O54781	1	1	30.34	SRSF protein kinase 2 OS=Mus musculus GN=Srpk2 PE=1 SV=2	Srpk2	0	0	0	0	0	0	17911.7	168803	332312	667346	81211.2	231183	269327	243726	369536	377694	229261	299781	433093	369210	256773	446174	321726	262923
Q9D6M3	1	1	47.77	Mitochondrial glutamate carrier 1 OS=Mus musculus GN=Slc25a22 PE=1 SV=1	Slc25a22	0	0	0	0	0	0	430459	143570	26399	76220.8	218009	224100	115571	135367	100285	269394	62058.6	102475	170494	35025.4	19192.9	18211.9	28001.1	18475.6
Q8CC35	1	1	38.9	Synaptopodin OS=Mus musculus GN=Synpo PE=1 SV=2	Synpo	0	0	0	0	0	0	316796	14548	160599	330184	166561	193758	105966	115115	94945.6	243892	43457.4	166987	51030.3	10815.7	34644.4	28453.7	71534.4	15170.2
F6SEU4	1	1	26.72	Ras/Rap GTPase-activating protein SynGAP OS=Mus musculus GN=Syngap1 PE=1 SV=2	Syngap1	0	0	0	0	0	0	150581	123281	2.8254e+06	2.88899e+06	649248	333653	0	0	0	0	0	0	0	0	0	0	0	0
Q9WVE8	3	3	138.07	Protein kinase C and casein kinase substrate in neurons protein 2 OS=Mus musculus GN=Pacsin2 PE=1 SV=1	Pacsin2	0	0	0	0	0	0	1.11586e+06	558912	449279	683279	490297	611446	918283	671232	1.13776e+06	2.00967e+06	534090	809747	1.0514e+06	1.49831e+06	977880	1.19831e+06	1.98418e+06	2.29392e+06
Q8BFQ8	2	1	85.54	Parkinson disease 7 domain-containing protein 1 OS=Mus musculus GN=Pddc1 PE=1 SV=1	Pddc1	0	0	0	0	0	0	2.56626e+06	2.19762e+06	4.21764e+06	7.04853e+06	4.50484e+06	4.96575e+06	839281	771979	1.51241e+06	1.51737e+06	622193	987884	978085	1.40046e+06	1.44459e+06	1.12189e+06	3.16966e+06	3.70863e+06
Q61481	3	3	267.54	Calcium/calmodulin-dependent 3',5'-cyclic nucleotide phosphodiesterase 1A OS=Mus musculus GN=Pde1a PE=1 SV=2	Pde1a	0	0	0	0	0	0	2.89396e+06	1.65614e+06	2.39775e+06	3.98354e+06	1.92338e+06	2.36191e+06	898581	1.10707e+06	1.68687e+06	3.29261e+06	1.06873e+06	1.98579e+06	3.00599e+06	3.92822e+06	2.52108e+06	2.76221e+06	3.56595e+06	4.15918e+06
O55091	3	3	211.13	Protein IMPACT OS=Mus musculus GN=Impact PE=1 SV=2	Impact	0	0	0	0	0	0	5.18273e+06	5.34214e+06	4.32847e+06	7.71668e+06	5.08752e+06	5.45978e+06	1.95225e+06	1.28725e+06	1.94902e+06	2.89487e+06	2.15082e+06	4.17606e+06	4.17663e+06	6.05169e+06	4.21764e+06	5.38581e+06	7.24468e+06	7.58722e+06
Q9CX56	1	1	44.68	26S proteasome non-ATPase regulatory subunit 8 OS=Mus musculus GN=Psmd8 PE=1 SV=2	Psmd8	0	0	0	0	0	0	0	0	0	0	0	0	150159	333107	194829	21918.9	144346	232803	187407	577566	548841	674372	221739	10723.1
P51410	2	2	65.63	60S ribosomal protein L9 OS=Mus musculus GN=Rpl9 PE=2 SV=2	Rpl9	0	0	0	0	0	0	0	0	0	0	0	0	66010.3	44809.4	49826.5	79043.5	37486.1	78059.5	58368.4	33998.2	14736.6	14095.5	31162.5	16571
Q4JIM5	1	1	32.73	Abelson tyrosine-protein kinase 2 OS=Mus musculus GN=Abl2 PE=1 SV=1	Abl2	0	0	0	0	0	0	0	0	0	0	0	0	75549.8	91980.8	24083.6	48476.4	59072.9	158178	0	0	0	0	0	0
Q9WTL7	1	1	30.89	Acyl-protein thioesterase 2 OS=Mus musculus GN=Lypla2 PE=1 SV=1	Lypla2	0	0	0	0	0	0	0	0	0	0	0	0	1.41289e+06	2.35686e+06	1.18429e+06	1.51539e+06	773796	1.62111e+06	2.06747e+06	2.33403e+06	678025	817961	2.8211e+06	2.2738e+06
Q8BZQ7	1	1	35.76	Anaphase-promoting complex subunit 2 OS=Mus musculus GN=Anapc2 PE=1 SV=2	Anapc2	0	0	0	0	0	0	0	0	0	0	0	0	103562	62006.3	264796	322848	26059.9	64979.1	247361	419082	250182	253478	381680	225704
Q3UHD9	2	2	49.89	Arf-GAP with GTPase, ANK repeat and PH domain-containing protein 2 OS=Mus musculus GN=Agap2 PE=1 SV=1	Agap2	0	0	0	0	0	0	0	0	0	0	0	0	61093.3	20257.6	26846.4	117625	68227.3	96879.7	0	0	0	0	0	0
Q3URY6	1	1	20.45	Armadillo repeat-containing protein 2 OS=Mus musculus GN=Armc2 PE=2 SV=3	Armc2	0	0	0	0	0	0	0	0	0	0	0	0	37809	34821.1	202184	146945	28682	25678.4	0	0	0	0	0	0
Q9DBR3	1	1	56.5	Armadillo repeat-containing protein 8 OS=Mus musculus GN=Armc8 PE=1 SV=2	Armc8	0	0	0	0	0	0	0	0	0	0	0	0	132458	107337	126203	217404	105709	194094	0	0	0	0	0	0
Q80YW5	1	1	16.56	B box and SPRY domain-containing protein OS=Mus musculus GN=Bspry PE=1 SV=1	Bspry	0	0	0	0	0	0	0	0	0	0	0	0	3.3066e+07	3.86365e+07	4.52558e+07	1.13744e+08	2.84027e+07	5.3848e+07	0	0	0	0	0	0
Q91VA3	1	1	14.78	Calpain-8 OS=Mus musculus GN=Capn8 PE=1 SV=1	Capn8	0	0	0	0	0	0	0	0	0	0	0	0	117650	106115	60237.1	112717	73254.7	89861.6	0	0	0	0	0	0
B2RW38	1	1	21.47	Cilia- and flagella-associated protein 58 OS=Mus musculus GN=Cfap58 PE=2 SV=1	Cfap58	0	0	0	0	0	0	0	0	0	0	0	0	15443.8	12550.8	3248.12	2497.91	49052.2	12837.2	0	0	0	0	0	0
Q8BTV2	1	1	26.57	Cleavage and polyadenylation specificity factor subunit 7 OS=Mus musculus GN=Cpsf7 PE=1 SV=2	Cpsf7	0	0	0	0	0	0	0	0	0	0	0	0	320324	369044	267333	1.09007e+06	100972	122374	340385	442990	435026	477545	379509	530095
Q9D6Y1	1	1	20.99	Coiled-coil domain-containing protein 3 OS=Mus musculus GN=Ccdc3 PE=1 SV=1	Ccdc3	0	0	0	0	0	0	0	0	0	0	0	0	146244	254096	305710	145526	0	180671	0	0	0	0	0	0
O88271	2	2	62.71	Craniofacial development protein 1 OS=Mus musculus GN=Cfdp1 PE=1 SV=1	Cfdp1	0	0	0	0	0	0	0	0	0	0	0	0	152465	87000.9	144067	208998	145284	259807	0	0	0	0	0	0
Q6ZQ73	1	1	22.41	Cullin-associated NEDD8-dissociated protein 2 OS=Mus musculus GN=Cand2 PE=1 SV=2	Cand2	0	0	0	0	0	0	0	0	0	0	0	0	132766	145917	131989	218975	179818	302773	0	0	0	0	0	0
O88487	2	1	101.77	Cytoplasmic dynein 1 intermediate chain 2 OS=Mus musculus GN=Dync1i2 PE=1 SV=1	Dync1i2	0	0	0	0	0	0	0	0	0	0	0	0	253385	315033	359153	309365	428748	756324	0	0	0	0	0	0
Q9QXB9	1	1	61.61	Developmentally-regulated GTP-binding protein 2 OS=Mus musculus GN=Drg2 PE=1 SV=1	Drg2	0	0	0	0	0	0	0	0	0	0	0	0	54807.9	34795	50094.8	0	2278.26	22314.4	11367.9	10204.9	0	1145.55	27626	30653.2
B1AZP2	1	1	55.7	Disks large-associated protein 4 OS=Mus musculus GN=Dlgap4 PE=1 SV=1	Dlgap4	0	0	0	0	0	0	0	0	0	0	0	0	135256	128719	13250	50254.1	237465	394106	130775	391003	329130	277985	378610	113207
Q9D2N4	1	1	25.88	Dystrobrevin alpha OS=Mus musculus GN=Dtna PE=1 SV=2	Dtna	0	0	0	0	0	0	0	0	0	0	0	0	8325.71	15235.9	0	0	129679	42724.9	0	0	0	0	0	0
Q5M8N4	1	1	24.42	Epimerase family protein SDR39U1 OS=Mus musculus GN=Sdr39u1 PE=1 SV=1	Sdr39u1	0	0	0	0	0	0	0	0	0	0	0	0	61182	30803.1	38779.2	69608.7	49650.6	66267	0	0	0	0	0	0
Q8JZQ9	1	1	42.64	Eukaryotic translation initiation factor 3 subunit B OS=Mus musculus GN=Eif3b PE=1 SV=1	Eif3b	0	0	0	0	0	0	0	0	0	0	0	0	2014.02	1496.71	2337.21	7697.46	16197.1	16139.1	0	0	0	0	0	0
P15626	1	1	34.3	Glutathione S-transferase Mu 2 OS=Mus musculus GN=Gstm2 PE=1 SV=2	Gstm2	0	0	0	0	0	0	0	0	0	0	0	0	4097.32	31767.9	55874.5	3037.7	7112.85	3495.58	66229.9	119752	10474.8	19913.4	62885.5	66064.5
Q60631	1	1	22.83	Growth factor receptor-bound protein 2 OS=Mus musculus GN=Grb2 PE=1 SV=1	Grb2	0	0	0	0	0	0	0	0	0	0	0	0	78967.5	256463	110599	85241.3	176577	259331	458639	528304	76061.1	70583.5	227069	489277
Q9CYW4	1	1	39.85	Haloacid dehalogenase-like hydrolase domain-containing protein 3 OS=Mus musculus GN=Hdhd3 PE=1 SV=1	Hdhd3	0	0	0	0	0	0	0	0	0	0	0	0	33466.6	20041	1714.87	64834.2	76253.4	105925	0	0	0	0	0	0
Q8BQM4	1	1	22.27	HEAT repeat-containing protein 3 OS=Mus musculus GN=Heatr3 PE=1 SV=1	Heatr3	0	0	0	0	0	0	0	0	0	0	0	0	681160	1.10303e+06	260344	682034	245942	380657	0	0	0	0	0	0
Q9D0E1	1	1	58.87	Heterogeneous nuclear ribonucleoprotein M OS=Mus musculus GN=Hnrnpm PE=1 SV=3	Hnrnpm	0	0	0	0	0	0	0	0	0	0	0	0	3641.47	2605.65	1054.24	13052.3	101305	3762.25	0	0	0	0	0	0
Q8BGC0	1	1	87.48	HIV Tat-specific factor 1 homolog OS=Mus musculus GN=Htatsf1 PE=1 SV=1	Htatsf1	0	0	0	0	0	0	0	0	0	0	0	0	241225	536326	309820	251013	263722	384620	0	0	0	0	0	0
Q60625	1	1	23.73	Intercellular adhesion molecule 5 OS=Mus musculus GN=Icam5 PE=1 SV=2	Icam5	0	0	0	0	0	0	0	0	0	0	0	0	135064	235791	16419.6	97965.2	8551.36	19306.8	338192	1.75742e+06	1.20267e+06	1.55553e+06	192797	278532
Q9WTX2	1	1	56.57	Interferon-inducible double-stranded RNA-dependent protein kinase activator A OS=Mus musculus GN=Prkra PE=1 SV=1	Prkra	0	0	0	0	0	0	0	0	0	0	0	0	1.68401e+06	1.99579e+06	1.33087e+06	3.33541e+06	584983	887857	0	0	0	0	0	0
P60853	1	1	15.66	Leucine zipper putative tumor suppressor 1 OS=Mus musculus GN=Lzts1 PE=2 SV=3	Lzts1	0	0	0	0	0	0	0	0	0	0	0	0	1.85087e+07	1.59285e+07	9.8605e+06	1.21997e+07	3.31398e+07	2.7469e+07	0	0	0	0	0	0
Q9D0E3	1	1	38.85	LysM and putative peptidoglycan-binding domain-containing protein 1 OS=Mus musculus GN=Lysmd1 PE=1 SV=1	Lysmd1	0	0	0	0	0	0	0	0	0	0	0	0	147.116	3201.71	7133.85	5782.54	31108.7	13546.7	0	0	0	0	0	0
Q922H4	1	1	23.71	Mannose-1-phosphate guanyltransferase alpha OS=Mus musculus GN=Gmppa PE=1 SV=1	Gmppa	0	0	0	0	0	0	0	0	0	0	0	0	147763	305524	232110	265258	79798	211639	337225	226417	344336	409763	170922	303238
Q9D1I5	1	1	36.94	Methylmalonyl-CoA epimerase, mitochondrial OS=Mus musculus GN=Mcee PE=1 SV=1	Mcee	0	0	0	0	0	0	0	0	0	0	0	0	507789	676156	120757	472218	280637	424730	647126	1.16157e+06	784292	551857	1.21953e+06	1.2003e+06
Q9CQT1	1	1	26.99	Methylthioribose-1-phosphate isomerase OS=Mus musculus GN=Mri1 PE=1 SV=1	Mri1	0	0	0	0	0	0	0	0	0	0	0	0	349817	409771	84812.5	290460	439111	559414	0	0	0	0	0	0
Q9Z224	1	1	24.2	Molybdopterin synthase sulfur carrier subunit OS=Mus musculus GN=Mocs2 PE=1 SV=1	Mocs2	0	0	0	0	0	0	0	0	0	0	0	0	215591	170542	259401	438127	100149	320218	0	0	0	0	0	0
O35678	1	1	59.69	Monoglyceride lipase OS=Mus musculus GN=Mgll PE=1 SV=1	Mgll	0	0	0	0	0	0	0	0	0	0	0	0	29660.9	0	0	59975.3	169831	3541.15	318888	35065.7	27520	11974.2	332405	102896
Q8C854	1	1	86.4	Myelin expression factor 2 OS=Mus musculus GN=Myef2 PE=1 SV=1	Myef2	0	0	0	0	0	0	0	0	0	0	0	0	0	61367.8	50714.5	50919.7	2867.57	65454.3	0	0	0	0	0	0
Q8BGC4	1	1	23.58	Prostaglandin reductase-3 OS=Mus musculus GN=Zadh2 PE=1 SV=1	Zadh2	0	0	0	0	0	0	0	0	0	0	0	0	162384	130654	249330	347496	158618	197203	0	0	0	0	0	0
Q9D0B6	1	1	17.74	Protein PBDC1 OS=Mus musculus GN=Pbdc1 PE=1 SV=1	Pbdc1	0	0	0	0	0	0	0	0	0	0	0	0	147084	30038.1	15046.3	38448.6	98833.5	124336	100004	125585	371582	280168	243054	528029
Q8K330	1	1	16.5	Protein phosphatase Slingshot homolog 3 OS=Mus musculus GN=Ssh3 PE=1 SV=1	Ssh3	0	0	0	0	0	0	0	0	0	0	0	0	243639	216950	942736	1.75193e+07	20205.1	279162	0	0	0	0	0	0
Q80U72	1	1	16.83	Protein scribble homolog OS=Mus musculus GN=Scrib PE=1 SV=2	Scrib	0	0	0	0	0	0	0	0	0	0	0	0	7.29905e+06	6.35328e+06	5.90165e+06	1.66272e+07	1.56693e+07	1.15849e+07	0	0	0	0	0	0
Q3UHK1	1	1	71.24	Proton myo-inositol cotransporter OS=Mus musculus GN=Slc2a13 PE=1 SV=2	Slc2a13	0	0	0	0	0	0	0	0	0	0	0	0	147489	585345	507062	674145	147122	496697	0	0	0	0	0	0
Q9CYI4	2	2	59.4	Putative RNA-binding protein Luc7-like 1 OS=Mus musculus GN=Luc7l PE=1 SV=2	Luc7l	0	0	0	0	0	0	0	0	0	0	0	0	98713.8	79754	168615	362705	20398	34552.8	0	0	0	0	0	0
Q7TNC4	2	2	110.84	Putative RNA-binding protein Luc7-like 2 OS=Mus musculus GN=Luc7l2 PE=1 SV=1	Luc7l2	0	0	0	0	0	0	0	0	0	0	0	0	105769	94318.6	172433	77347.5	276160	285535	339635	321856	239940	287015	326981	341866
Q921Q7	1	1	38.76	Ras and Rab interactor 1 OS=Mus musculus GN=Rin1 PE=1 SV=1	Rin1	0	0	0	0	0	0	0	0	0	0	0	0	21597	22437.4	63075.5	135965	14271.9	24378	72105.6	49299.7	96683.5	140032	198474	220981
P55258	1	1	88.86	Ras-related protein Rab-8A OS=Mus musculus GN=Rab8a PE=1 SV=2	Rab8a	0	0	0	0	0	0	0	0	0	0	0	0	423527	464727	330692	896699	247475	473652	484046	609404	629776	523035	1.28762e+06	1.53786e+06
Q9CQE5	2	2	88.67	Regulator of G-protein signaling 10 OS=Mus musculus GN=Rgs10 PE=1 SV=1	Rgs10	0	0	0	0	0	0	0	0	0	0	0	0	333701	386297	347413	243244	144318	417482	0	0	0	0	0	0
Q8K4Q0	1	1	27.24	Regulatory-associated protein of mTOR OS=Mus musculus GN=Rptor PE=1 SV=1	Rptor	0	0	0	0	0	0	0	0	0	0	0	0	212472	161020	147601	326036	120905	232842	1.29607e+06	1.30447e+06	1.30899e+06	1.17961e+06	1.78316e+06	1.77843e+06
Q9ERI6	1	1	25.43	Retinol dehydrogenase 14 OS=Mus musculus GN=Rdh14 PE=1 SV=1	Rdh14	0	0	0	0	0	0	0	0	0	0	0	0	119125	122760	323578	571213	46412.9	145079	0	0	0	0	0	0
P18653	2	2	78.74	Ribosomal protein S6 kinase alpha-1 OS=Mus musculus GN=Rps6ka1 PE=1 SV=1	Rps6ka1	0	0	0	0	0	0	0	0	0	0	0	0	142764	135911	335538	558064	121501	160574	664265	541348	337257	371642	1.36791e+06	1.41352e+06
P70122	1	1	51.29	Ribosome maturation protein SBDS OS=Mus musculus GN=Sbds PE=1 SV=4	Sbds	0	0	0	0	0	0	0	0	0	0	0	0	323715	403615	244913	351604	162214	347269	481193	1.34886e+06	497783	511607	801108	581065
Q9D7H3	1	1	58.34	RNA 3'-terminal phosphate cyclase OS=Mus musculus GN=RtcA PE=1 SV=2	RtcA	0	0	0	0	0	0	0	0	0	0	0	0	1.2417e+06	1.23083e+06	860534	690715	124859	141670	2.10743e+06	1.67682e+06	1.78353e+06	768814	3.39061e+06	2.69538e+06
Q8BP71	1	1	34.6	RNA binding protein fox-1 homolog 2 OS=Mus musculus GN=Rbfox2 PE=1 SV=2	Rbfox2	0	0	0	0	0	0	0	0	0	0	0	0	1800.55	0	34329.1	0	44630.2	0	0	0	0	0	0	0
Q61545	1	1	72.43	RNA-binding protein EWS OS=Mus musculus GN=Ewsr1 PE=1 SV=2	Ewsr1	0	0	0	0	0	0	0	0	0	0	0	0	350959	278983	64234	13381.2	256424	709527	312831	425110	214522	111332	1391.86	19614.7
Q5RJI5	1	1	17.56	Serine/threonine-protein kinase BRSK1 OS=Mus musculus GN=Brsk1 PE=1 SV=1	Brsk1	0	0	0	0	0	0	0	0	0	0	0	0	395574	367164	172462	33275.9	435754	1.0011e+06	0	0	0	0	0	0
Q07417	1	1	45.47	Short-chain specific acyl-CoA dehydrogenase, mitochondrial OS=Mus musculus GN=Acads PE=1 SV=2	Acads	0	0	0	0	0	0	0	0	0	0	0	0	568932	125196	568040	125854	488335	709571	905093	1.15065e+06	977618	923778	2.2403e+06	2.38921e+06
Q812A2	2	2	60.22	SLIT-ROBO Rho GTPase-activating protein 3 OS=Mus musculus GN=Srgap3 PE=1 SV=1	Srgap3	0	0	0	0	0	0	0	0	0	0	0	0	34705.5	35333.9	2410.33	15764.5	64253.6	93980.6	0	0	0	0	0	0
Q64213	1	1	39.34	Splicing factor 1 OS=Mus musculus GN=Sf1 PE=1 SV=6	Sf1	0	0	0	0	0	0	0	0	0	0	0	0	183042	530719	209968	158678	153403	330063	257383	628611	299561	408285	64442.3	18944.1
Q921M3	1	1	37.79	Splicing factor 3B subunit 3 OS=Mus musculus GN=Sf3b3 PE=1 SV=1	Sf3b3	0	0	0	0	0	0	0	0	0	0	0	0	164141	266850	209036	506074	237599	286926	0	0	0	0	0	0
Q923Q2	1	1	15.8	StAR-related lipid transfer protein 13 OS=Mus musculus GN=Stard13 PE=1 SV=5	Stard13	0	0	0	0	0	0	0	0	0	0	0	0	9.92041e+07	6.68185e+07	9.66348e+07	1.50121e+08	3.74293e+07	6.44078e+07	0	0	0	0	0	0
Q6ZPF3	1	1	17.77	T-lymphoma invasion and metastasis-inducing protein 2 OS=Mus musculus GN=Tiam2 PE=1 SV=2	Tiam2	0	0	0	0	0	0	0	0	0	0	0	0	280294	303103	553140	502203	11889.2	15287.8	0	0	0	0	0	0
Q3U0M1	1	1	62.27	Trafficking protein particle complex subunit 9 OS=Mus musculus GN=Trappc9 PE=1 SV=2	Trappc9	0	0	0	0	0	0	0	0	0	0	0	0	43732.8	25322.7	38265.7	124439	31478.9	90329.9	0	0	0	0	0	0
Q9DBB8	1	1	95.15	Trans-1,2-dihydrobenzene-1,2-diol dehydrogenase OS=Mus musculus GN=Dhdh PE=1 SV=1	Dhdh	0	0	0	0	0	0	0	0	0	0	0	0	294723	703243	260541	934323	209848	322649	781648	1.11638e+06	2.42313e+06	1.99569e+06	787489	172162
Q8VC30	1	1	41.81	Triokinase/FMN cyclase OS=Mus musculus GN=Tkfc PE=1 SV=1	Tkfc	0	0	0	0	0	0	0	0	0	0	0	0	998653	1.1523e+06	584554	110278	796552	881473	0	0	0	0	0	0
Q9JKK7	1	1	77.42	Tropomodulin-2 OS=Mus musculus GN=Tmod2 PE=1 SV=2	Tmod2	0	0	0	0	0	0	0	0	0	0	0	0	190515	331777	201193	185218	54928.3	83955.5	0	0	0	0	0	0
Q0KL01	1	1	54.02	UBX domain-containing protein 2B OS=Mus musculus GN=Ubxn2b PE=1 SV=2	Ubxn2b	0	0	0	0	0	0	0	0	0	0	0	0	94035.4	42327.3	74275.3	121138	78434.9	142647	239335	306616	126583	111119	199401	172146
Q64331	1	1	21.65	Unconventional myosin-VI OS=Mus musculus GN=Myo6 PE=1 SV=1	Myo6	0	0	0	0	0	0	0	0	0	0	0	0	21751.3	106656	49994.3	179775	3557.56	25504.1	481224	394409	572958	440036	881222	1.37383e+06
Q6VNB8	1	1	25.97	WD repeat and FYVE domain-containing protein 3 OS=Mus musculus GN=Wdfy3 PE=1 SV=1	Wdfy3	0	0	0	0	0	0	0	0	0	0	0	0	298000	266326	197745	172169	499669	483562	0	0	0	0	0	0
Q8VIG0	1	1	23.49	Zinc finger CCHC domain-containing protein 14 OS=Mus musculus GN=Zcchc14 PE=2 SV=1	Zcchc14	0	0	0	0	0	0	0	0	0	0	0	0	610820	566598	1.18459e+06	1.55535e+06	594010	1.24642e+06	739702	1.26468e+06	1.25761e+06	1.15166e+06	2.51973e+06	2.10946e+06
Q62431	1	1	17.51	AT-rich interactive domain-containing protein 3A OS=Mus musculus GN=Arid3a PE=1 SV=1	Arid3a	0	0	0	0	0	0	0	0	0	0	0	0	0	0	0	0	0	0	122814	352559	172627	492267	697495	257605
Q60967	1	1	77.94	Bifunctional 3'-phosphoadenosine 5'-phosphosulfate synthase 1 OS=Mus musculus GN=Papss1 PE=1 SV=1	Papss1	0	0	0	0	0	0	0	0	0	0	0	0	0	0	0	0	0	0	240588	334337	312089	348176	249428	33322.8
Q6PFX6	1	1	21.15	Cadherin-24 OS=Mus musculus GN=Cdh24 PE=2 SV=1	Cdh24	0	0	0	0	0	0	0	0	0	0	0	0	0	0	0	0	0	0	6.65037e+06	1.15853e+07	7.42925e+06	1.73469e+07	1.28236e+07	1.14149e+07
Q99MZ3	1	1	14.98	Carbohydrate-responsive element-binding protein OS=Mus musculus GN=Mlxipl PE=1 SV=1	Mlxipl	0	0	0	0	0	0	0	0	0	0	0	0	0	0	0	0	0	0	1.29624e+07	1.82734e+07	9.5443e+06	9.67095e+06	2.92382e+07	2.9039e+07
Q61214	1	1	19.23	Dual specificity tyrosine-phosphorylation-regulated kinase 1A OS=Mus musculus GN=Dyrk1a PE=1 SV=1	Dyrk1a	0	0	0	0	0	0	0	0	0	0	0	0	0	0	0	0	0	0	207953	506531	197224	327604	589749	835165
Q9D1M4	1	1	21.97	Eukaryotic translation elongation factor 1 epsilon-1 OS=Mus musculus GN=Eef1e1 PE=1 SV=1	Eef1e1	0	0	0	0	0	0	0	0	0	0	0	0	0	0	0	0	0	0	431697	512334	195990	238040	492231	634781
Q9CR41	1	1	29.03	Huntingtin-interacting protein K OS=Mus musculus GN=Hypk PE=1 SV=2	Hypk	0	0	0	0	0	0	0	0	0	0	0	0	0	0	0	0	0	0	62813.2	148308	17940.5	27338.4	0	9088.11
B8JK39	1	1	20.22	Integrin alpha-9 OS=Mus musculus GN=Itga9 PE=1 SV=1	Itga9	0	0	0	0	0	0	0	0	0	0	0	0	0	0	0	0	0	0	2.66998e+06	4.71013e+06	7.36348e+06	4.07593e+06	2.73806e+06	5.5038e+06
Q5RJG7	1	1	27.77	Isoprenoid synthase domain-containing protein OS=Mus musculus GN=Ispd PE=2 SV=1	Ispd	0	0	0	0	0	0	0	0	0	0	0	0	0	0	0	0	0	0	419174	523144	279321	723166	393562	72763.3
O35286	1	1	22.76	Pre-mRNA-splicing factor ATP-dependent RNA helicase DHX15 OS=Mus musculus GN=Dhx15 PE=1 SV=2	Dhx15	0	0	0	0	0	0	0	0	0	0	0	0	0	0	0	0	0	0	34144.7	62193.3	337.046	1157.8	32814.7	3312.8
Q8BYM8	1	1	41.53	Probable cysteine--tRNA ligase, mitochondrial OS=Mus musculus GN=Cars2 PE=1 SV=2	Cars2	0	0	0	0	0	0	0	0	0	0	0	0	0	0	0	0	0	0	74127.3	66340.9	13905.8	41991	74758.1	63280.7
Q8K2H3	1	1	17.38	Protein FAM13B OS=Mus musculus GN=Fam13b PE=1 SV=1	Fam13b	0	0	0	0	0	0	0	0	0	0	0	0	0	0	0	0	0	0	5.76824e+06	9.08774e+06	5.27461e+06	9.43012e+06	9.95272e+06	1.03721e+07
Q52KF3	1	1	17.66	Protein spire homolog 1 OS=Mus musculus GN=Spire1 PE=1 SV=1	Spire1	0	0	0	0	0	0	0	0	0	0	0	0	0	0	0	0	0	0	904230	2.21149e+06	806946	1.20023e+06	1.27427e+06	1.72266e+06
Q69ZH9	1	1	18.85	Rho GTPase-activating protein 23 OS=Mus musculus GN=Arhgap23 PE=1 SV=2	Arhgap23	0	0	0	0	0	0	0	0	0	0	0	0	0	0	0	0	0	0	400886	867182	511990	756579	1.15282e+06	1.28885e+06
Q811P8	1	1	17.26	Rho GTPase-activating protein 32 OS=Mus musculus GN=Arhgap32 PE=1 SV=2	Arhgap32	0	0	0	0	0	0	0	0	0	0	0	0	0	0	0	0	0	0	483454	565754	440353	606200	845292	632337
Q9JHW4	1	1	19.96	Selenocysteine-specific elongation factor OS=Mus musculus GN=Eefsec PE=1 SV=2	Eefsec	0	0	0	0	0	0	0	0	0	0	0	0	0	0	0	0	0	0	157085	190363	137363	165186	261730	256207
O08992	1	1	75.57	Syntenin-1 OS=Mus musculus GN=Sdcbp PE=1 SV=1	Sdcbp	0	0	0	0	0	0	0	0	0	0	0	0	0	0	0	0	0	0	127087	57379.7	445653	268252	145915	10120.5
Q3UKC1	1	1	32.06	Tax1-binding protein 1 homolog OS=Mus musculus GN=Tax1bp1 PE=1 SV=2	Tax1bp1	0	0	0	0	0	0	0	0	0	0	0	0	0	0	0	0	0	0	10018.1	0	0	0	0	0
Q6PB44	1	1	26.37	Tyrosine-protein phosphatase non-receptor type 23 OS=Mus musculus GN=Ptpn23 PE=1 SV=2	Ptpn23	0	0	0	0	0	0	0	0	0	0	0	0	0	0	0	0	0	0	1.44109e+06	1.58936e+06	3.21242e+06	2.92793e+06	893490	275260
Q811F1	1	1	18.87	Zinc finger and BTB domain-containing protein 41 OS=Mus musculus GN=Zbtb41 PE=2 SV=4	Zbtb41	0	0	0	0	0	0	0	0	0	0	0	0	0	0	0	0	0	0	131445	147172	986847	68285.9	9121.05	19473.1
Q05BC3	2	2	76.4	Echinoderm microtubule-associated protein-like 1 OS=Mus musculus GN=Eml1 PE=1 SV=1	Eml1	3235.54	66.6855	3235.54	364552	49066.6	37122.2	367481	541545	307779	281600	388174	437325	1.06257e+06	633815	1.42061e+06	1.68347e+06	843223	1.61749e+06	1.53288e+06	1.7024e+06	1.10507e+06	1.02048e+06	3.33496e+06	2.6617e+06
Q8BW41	1	1	14.68	Protein O-linked-mannose beta-1,4-N-acetylglucosaminyltransferase 2 OS=Mus musculus GN=Pomgnt2 PE=1 SV=1	Pomgnt2	1.65562e+07	2.02892e+07	1.65562e+07	1.8766e+06	5389.91	609.885	207339	1.04877e+07	478.46	203.579	11051.8	16201.8	0	0	0	0	0	0	0	0	0	0	0	0
P07310	1	1	102.34	Creatine kinase M-type OS=Mus musculus GN=Ckm PE=1 SV=1	Ckm	1.98183e+07	2.5533e+07	1.98183e+07	7.27185e+07	3.06799e+07	4.34657e+07	4.9741e+07	6.10762e+07	9.3289e+07	1.24734e+08	8.331e+07	8.81745e+07	7.5862e+07	7.97128e+07	3.49545e+07	8.32722e+07	6.33383e+07	8.08314e+07	1.15804e+08	1.17314e+08	1.717e+08	1.0444e+08	1.47217e+08	2.19522e+08
Q8BKX1	2	2	51.06	Brain-specific angiogenesis inhibitor 1-associated protein 2 OS=Mus musculus GN=Baiap2 PE=1 SV=2	Baiap2	129755	151232	129755	51401.3	110516	41322.9	0	0	0	0	0	0	0	0	0	0	0	0	0	0	0	0	0	0
Q99JX3	2	2	83.04	Golgi reassembly-stacking protein 2 OS=Mus musculus GN=Gorasp2 PE=1 SV=3	Gorasp2	73917.9	200072	73917.9	1.51966e+06	77319.1	173739	339449	289548	779738	897889	947737	675315	782117	522811	1.11653e+06	1.12624e+06	596134	1.01227e+06	1.87848e+06	2.00542e+06	2.53688e+06	2.28345e+06	1.9492e+06	1.41504e+06
Q61425	2	2	94.65	Hydroxyacyl-coenzyme A dehydrogenase, mitochondrial OS=Mus musculus GN=Hadh PE=1 SV=2	Hadh	41662.1	62626.9	41662.1	416999	280402	16631.2	769658	480329	758754	1.15248e+06	1.10437e+06	1.39607e+06	926246	462416	1.08859e+06	1.09596e+06	606716	915343	1.48808e+06	1.88045e+06	2.39277e+06	1.38258e+06	2.24904e+06	3.96675e+06
Q99JP6	2	2	90.21	Homer protein homolog 3 OS=Mus musculus GN=Homer3 PE=1 SV=2	Homer3	15422.1	50884	15422.1	669272	19912.7	13229.5	0	0	0	0	0	0	121389	124788	469420	1.10151e+06	59718.9	195550	68809.1	47498.9	7407.51	25316.2	159458	27325.8
Q9DB32	2	2	85.03	Hydroxyacylglutathione hydrolase-like protein OS=Mus musculus GN=Haghl PE=1 SV=1	Haghl	828.708	4475.16	828.708	114264	175983	149449	537765	543349	515379	503375	233494	262797	294115	231424	739770	957006	170356	290139	919975	1.21116e+06	1.38467e+06	1.214e+06	4.25496e+06	2.73478e+06
P62843	2	2	111.39	40S ribosomal protein S15 OS=Mus musculus GN=Rps15 PE=1 SV=2	Rps15	35776.1	55090.2	35776.1	443750	119149	55247.5	723057	878563	1.50651e+06	1.5469e+06	3.26626e+06	2.10931e+06	1.46771e+06	1.59159e+06	2.35922e+06	1.986e+06	709862	762611	943356	904052	1.14723e+06	619723	1.30154e+06	1.42423e+06
Q8BLJ3	2	2	61.54	PI-PLC X domain-containing protein 3 OS=Mus musculus GN=Plcxd3 PE=1 SV=1	Plcxd3	62030.5	113229	62030.5	713495	66281.2	124086	1.27347e+06	1.97882e+06	1.02523e+06	1.11729e+06	1.16225e+06	126060	1.60408e+06	2.05042e+06	2.83554e+06	1.5541e+06	1.582e+06	2.20597e+06	1.36875e+06	1.10988e+06	2.0132e+06	1.11543e+06	1.57376e+06	1.73349e+06
Q6P9R2	2	2	81.52	Serine/threonine-protein kinase OSR1 OS=Mus musculus GN=Oxsr1 PE=1 SV=1	Oxsr1	56022.2	64865.7	56022.2	68958.8	2224.26	62532.4	645967	675798	483818	738175	500316	464346	281576	643702	472258	1.1922e+06	351938	600860	174299	261775	123897	202883	347990	416720
Q60766	1	1	22.14	Immunity-related GTPase family M protein 1 OS=Mus musculus GN=Irgm1 PE=1 SV=1	Irgm1	691408	845296	691408	25148.2	600.294	1388.7	0	0	0	0	0	0	0	0	0	0	0	0	0	0	0	0	0	0
P83882	1	1	70.07	60S ribosomal protein L36a OS=Mus musculus GN=Rpl36a PE=1 SV=2	Rpl36a	1.86801e+06	2.83171e+06	1.86801e+06	2.45535e+06	2.67802e+06	2.65385e+06	6.86092e+06	6.05308e+06	1.0362e+06	2.04026e+06	2.49565e+06	3.46448e+06	2.5206e+06	1.92034e+06	2.5497e+06	5.4595e+06	1.13e+06	2.49715e+06	2.24681e+06	2.27138e+06	2.12926e+06	3.31449e+06	1.92878e+06	2.54876e+06
P63323	1	1	78.68	40S ribosomal protein S12 OS=Mus musculus GN=Rps12 PE=1 SV=2	Rps12	1.32218e+06	2.01341e+06	1.32218e+06	1036.68	1.1047e+06	472958	462463	371008	15.7112	0	1696.63	70.1482	0	0	0	0	0	0	0	0	0	0	0	0
P84075	1	1	89.47	Neuron-specific calcium-binding protein hippocalcin OS=Mus musculus GN=Hpca PE=1 SV=2	Hpca	2.70463e+06	4.58022e+06	2.70463e+06	5.47883e+06	6.51575e+06	8.60417e+06	2.61278e+06	4.08086e+06	4.59927e+06	8.45889e+06	4.16241e+06	4.61638e+06	2.06544e+06	2.67318e+06	2.21079e+06	2.58253e+06	2.78036e+06	3.82928e+06	4.02188e+06	7.72054e+06	1.83921e+06	2.49285e+06	6.14446e+06	6.19473e+06
Q6NZJ6	1	1	30.55	Eukaryotic translation initiation factor 4 gamma 1 OS=Mus musculus GN=Eif4g1 PE=1 SV=1	Eif4g1	793910	1.43153e+06	793910	1.70529e+06	1.05181e+06	1.38743e+06	744249	669777	210126	381654	710711	843377	813441	524803	737008	1.08398e+06	628717	1.21632e+06	1.15664e+06	1.65018e+06	958298	1.24055e+06	1.4082e+06	1.39812e+06
Q8BHE3	1	1	37.97	Caytaxin OS=Mus musculus GN=Atcay PE=1 SV=1	Atcay	856782	1.57444e+06	856782	1.54955e+06	571767	1.31066e+06	563349	321210	394355	637705	494307	561049	391002	477466	462203	778586	425099	704191	1.28718e+06	2.4985e+06	1.29346e+06	1.5171e+06	3.15818e+06	2.98533e+06
P17932	1	1	15.22	Putative 60S ribosomal protein L32' OS=Mus musculus GN=Rpl32-ps PE=5 SV=2	Rpl32-ps	2.27473e+06	2.24188e+06	2.27473e+06	48.8803	343.225	399.927	0	0	0	0	0	0	0	0	0	0	0	0	0	0	0	0	0	0
Q5EBJ4	1	1	29.45	Ermin OS=Mus musculus GN=Ermn PE=1 SV=1	Ermn	7.4524e+06	9.68451e+06	7.4524e+06	6.34608e+06	3.31399e+06	6.01493e+06	2.34212e+06	3.8131e+06	7.79944e+06	1.56088e+07	1.15946e+07	8.88453e+06	713420	1.07607e+06	858774	902679	0	531592	0	0	0	0	0	0
Q9CQM9	1	1	32.54	Glutaredoxin-3 OS=Mus musculus GN=Glrx3 PE=1 SV=1	Glrx3	5.63547e+07	7.08644e+07	5.63547e+07	7.84267e+07	3.10487e+07	4.09311e+07	3.21464e+07	3.87936e+07	5.00852e+07	7.14551e+07	1.93292e+07	3.28179e+07	1.47374e+07	1.07378e+07	2.35768e+07	3.38123e+07	1.99508e+07	2.72103e+07	4.27065e+07	5.12724e+07	8.51378e+07	9.08918e+07	1.05044e+08	8.54905e+07
Q60837	1	1	28.46	Interleukin-12 receptor subunit beta-1 OS=Mus musculus GN=Il12rb1 PE=1 SV=2	Il12rb1	1.49732e+06	1.82462e+06	1.49732e+06	1.22982e+06	1.10079e+06	1.36393e+06	0	0	0	0	0	0	0	0	0	0	0	0	0	0	0	0	0	0
P54822	1	1	47.72	Adenylosuccinate lyase OS=Mus musculus GN=Adsl PE=1 SV=2	Adsl	2.62416e+06	4.51242e+06	2.62416e+06	3.91915e+06	3.24897e+06	3.30503e+06	1.98937e+06	2.11064e+06	1.69032e+06	2.3323e+06	1.96293e+06	2.17987e+06	1.48237e+06	1.73684e+06	1.55934e+06	2.39387e+06	1.05061e+06	1.51655e+06	2.09104e+06	3.07331e+06	1.93702e+06	2.16192e+06	3.55629e+06	3.9271e+06
Q8CDG3	2	2	82.09	Deubiquitinating protein VCIP135 OS=Mus musculus GN=Vcpip1 PE=1 SV=1	Vcpip1	141292	118603	141292	320573	98516.3	186030	1.09396e+06	310929	299122	635072	428690	412910	250742	285861	280395	794696	150776	319492	421937	525021	214397	349717	338700	277672
Q6P1F6	2	2	72.25	Serine/threonine-protein phosphatase 2A 55 kDa regulatory subunit B alpha isoform OS=Mus musculus GN=Ppp2r2a PE=1 SV=1	Ppp2r2a	181274	305678	181274	35508.3	320045	265545	626415	759438	160781	301592	714257	414888	494995	374316	848488	1.31884e+06	566120	968761	945461	1.46553e+06	1.18079e+06	1.52536e+06	1.93283e+06	2.22942e+06
Q9DCR2	2	2	108.05	AP-3 complex subunit sigma-1 OS=Mus musculus GN=Ap3s1 PE=1 SV=2	Ap3s1	6236.89	5118.93	6236.89	30544.7	612652	231080	579752	617337	418322	497291	268926	106048	479343	401111	251521	10194.7	314581	515593	880521	1.16773e+06	1.33161e+06	1.33347e+06	2.02847e+06	2.45043e+06
P21126	2	2	76.93	Ubiquitin-like protein 4A OS=Mus musculus GN=Ubl4a PE=1 SV=1	Ubl4a	17367.3	48941	17367.3	239175	160292	63648.9	894585	891144	876336	1.05144e+06	737239	857519	478147	590771	412360	849781	404266	589464	958794	1.40137e+06	1.4916e+06	1.25584e+06	2.11795e+06	3.3397e+06
Q6P1B1	2	2	97.77	Xaa-Pro aminopeptidase 1 OS=Mus musculus GN=Xpnpep1 PE=1 SV=1	Xpnpep1	47003.2	91039.7	47003.2	282254	309066	148043	547956	546269	1.32161e+06	1.80863e+06	1.318e+06	1.28478e+06	1.50672e+06	1.84983e+06	1.32224e+06	1.41133e+06	939364	1.28405e+06	3.93839e+06	4.46521e+06	2.68491e+06	2.00256e+06	4.19447e+06	3.94581e+06
P08003	2	2	74	Protein disulfide-isomerase A4 OS=Mus musculus GN=Pdia4 PE=1 SV=3	Pdia4	148364	175533	148364	278054	136992	108346	473619	683511	101793	226313	705744	900449	268626	295218	182922	391571	331243	402387	675479	962995	383643	479426	733424	785476
Q8JZW4	2	2	67.31	Copine-5 OS=Mus musculus GN=Cpne5 PE=1 SV=1	Cpne5	239151	344845	239151	313009	149128	106069	56264.4	335617	249158	281173	20659.1	162379	0	0	0	0	0	0	227097	734862	127097	279504	253912	1.09194e+06
Q9QZ88	2	2	100.05	Vacuolar protein sorting-associated protein 29 OS=Mus musculus GN=Vps29 PE=1 SV=1	Vps29	68235.7	90940.5	68235.7	206842	465088	482974	684367	359540	300549	598029	236326	274958	594296	772117	807327	1.90387e+06	142711	366459	482914	1.19387e+06	549675	823152	1.41619e+06	1.29437e+06
Q9D2V7	2	2	113.55	Coronin-7 OS=Mus musculus GN=Coro7 PE=1 SV=2	Coro7	69563.9	205321	69563.9	508265	212153	214613	218908	278412	105229	82955.6	282623	288571	77792.1	88420.4	83583.5	110468	82066.9	153602	655233	1.71504e+06	1.13677e+06	1.50498e+06	1.58962e+06	1.85181e+06
Q8BMF3	2	2	118.51	NADP-dependent malic enzyme, mitochondrial OS=Mus musculus GN=Me3 PE=1 SV=2	Me3	88435.2	95329.6	88435.2	400855	170864	193257	475861	287450	471612	851260	502356	735658	236639	386550	387969	746867	149221	370161	580588	912176	720504	941025	424724	311493
P63046	2	2	65.19	Sulfotransferase 4A1 OS=Mus musculus GN=Sult4a1 PE=1 SV=1	Sult4a1	149657	178414	149657	129966	53303.7	37557	601025	439048	1.17726e+06	1.6388e+06	1.69969e+06	1.21447e+06	277020	184983	136326	252623	215579	344102	888589	995488	405083	335841	594708	500303
P59279	2	2	72.48	Ras-related protein Rab-2B OS=Mus musculus GN=Rab2b PE=1 SV=1	Rab2b	108880	118239	108880	587352	165264	110590	129772	132622	245613	438307	334855	308252	367743	423392	456698	777078	212231	548784	503850	834581	436072	538450	993961	1.41799e+06
O08638	2	2	77.13	Myosin-11 OS=Mus musculus GN=Myh11 PE=1 SV=1	Myh11	251518	368127	251518	749467	301885	237086	294228	253374	1.88617e+06	2.18994e+06	857968	992041	394290	440624	451692	223384	565864	645712	0	0	0	0	0	0
O35639	2	2	108.05	Annexin A3 OS=Mus musculus GN=Anxa3 PE=1 SV=4	Anxa3	110320	169531	110320	101730	155881	193954	289772	288936	115517	165382	307043	307810	483635	459481	422898	531788	175856	322180	644959	754391	276273	171962	984172	923905
Q9R0D8	2	2	82.92	WD repeat-containing protein 54 OS=Mus musculus GN=Wdr54 PE=1 SV=1	Wdr54	119658	230651	119658	459043	396629	614835	1.00385e+06	378425	819038	1.15718e+06	483254	1.03842e+06	1.2266e+06	1.7532e+06	1.38981e+06	1.50163e+06	919445	1.37801e+06	1.27395e+06	1.32683e+06	2.24594e+06	2.00211e+06	942975	685529
O08795	2	2	92.02	Glucosidase 2 subunit beta OS=Mus musculus GN=Prkcsh PE=1 SV=1	Prkcsh	61934.3	117012	61934.3	239107	8658.28	11425.6	87659.9	76792.4	13298.3	32646	402143	512886	112831	104463	71496.1	48729.1	150989	365195	109036	124993	61157.3	54175.3	89252.6	129195
P00920	2	2	101.32	Carbonic anhydrase 2 OS=Mus musculus GN=Ca2 PE=1 SV=4	Ca2	57259.3	124715	57259.3	910542	431153	285371	977114	501022	936916	1.30171e+06	2.51929e+06	2.4636e+06	1.02874e+06	1.24684e+06	1.23005e+06	1.78469e+06	778489	1.46956e+06	1.78466e+06	2.35755e+06	1.50686e+06	1.67951e+06	1.3701e+06	1.26626e+06
Q9QXS1	2	2	89.65	Plectin OS=Mus musculus GN=Plec PE=1 SV=3	Plec	372485	434698	372485	201146	21184.4	28311.6	66517.8	118374	258517	359771	81344	95149.6	400705	88951	526101	589572	223563	425152	37109.9	96554.4	145403	29595.3	210972	39831.9
O88531	2	2	78.42	Palmitoyl-protein thioesterase 1 OS=Mus musculus GN=Ppt1 PE=1 SV=2	Ppt1	288242	292083	288242	594957	247883	251186	575132	539991	98650.6	165345	412008	450994	410858	516846	617864	694483	311586	465222	1.38286e+06	1.41043e+06	2.12236e+06	1.19801e+06	2.82321e+06	3.52836e+06
P62270	2	2	65.66	40S ribosomal protein S18 OS=Mus musculus GN=Rps18 PE=1 SV=3	Rps18	16413.8	10747.3	16413.8	382615	214846	58214.8	0	0	0	0	0	0	488701	679191	436081	112924	35315.9	287910	390127	498605	491710	492928	113652	820103
Q9JMH9	2	2	61.25	Unconventional myosin-XVIIIa OS=Mus musculus GN=Myo18a PE=1 SV=2	Myo18a	87869.8	96676.2	87869.8	47812.7	173450	115251	1.95122e+06	2.40076e+06	2.10804e+06	3.63804e+06	2.5467e+06	2.70642e+06	2.04141e+06	2.31998e+06	2.65656e+06	3.20509e+06	1.2707e+06	2.54755e+06	2.72574e+06	4.51225e+06	3.42436e+06	3.1368e+06	4.61446e+06	5.08257e+06
Q99LP6	1	1	71.68	GrpE protein homolog 1, mitochondrial OS=Mus musculus GN=Grpel1 PE=1 SV=1	Grpel1	1.12023e+06	1.17725e+06	1.12023e+06	1.49529e+06	787949	999566	681607	1.01853e+06	655014	1.0404e+06	510857	775132	594603	346063	951506	1.62781e+06	354486	684933	2.02318e+06	2.4181e+06	1.26504e+06	2.25889e+06	2.87531e+06	3.34511e+06
O08915	1	1	53.29	AH receptor-interacting protein OS=Mus musculus GN=Aip PE=1 SV=1	Aip	827972	1.24676e+06	827972	1.40157e+06	567022	788419	578371	265660	792505	1.16522e+06	951523	951622	98778.1	75605.6	180653	305031	152574	267654	813186	1.44971e+06	674677	591020	1.60175e+06	1.74603e+06
Q9CQX8	1	1	80.33	28S ribosomal protein S36, mitochondrial OS=Mus musculus GN=Mrps36 PE=1 SV=1	Mrps36	767082	934533	767082	1.72483e+06	1.3935e+06	1.10447e+06	3.86841e+06	5.6788e+06	917703	1.04342e+06	1.7375e+06	2.84191e+06	1.48985e+06	1.46651e+06	1.96417e+06	2.84283e+06	1.31501e+06	2.22326e+06	1.99987e+06	3.45144e+06	2.603e+06	2.53456e+06	5.97982e+06	5.91647e+06
P62274	1	1	63.19	40S ribosomal protein S29 OS=Mus musculus GN=Rps29 PE=3 SV=2	Rps29	993601	870501	993601	0	45949.1	1728.34	0	0	0	0	0	0	0	0	0	0	0	0	0	0	0	0	0	0
Q91XU3	1	1	28.79	Phosphatidylinositol 5-phosphate 4-kinase type-2 gamma OS=Mus musculus GN=Pip4k2c PE=1 SV=1	Pip4k2c	903666	1.06038e+06	903666	252986	666471	132594	177850	184026	260087	330940	394300	202751	685812	963774	778573	552567	492624	682724	0	0	0	0	0	0
Q8CGF6	1	1	132.17	WD repeat-containing protein 47 OS=Mus musculus GN=Wdr47 PE=1 SV=2	Wdr47	1.10888e+06	1.77259e+06	1.10888e+06	1.52961e+06	2.71556e+06	1.87281e+06	4.60942e+06	3.79206e+06	902953	1.59508e+06	1.26965e+06	1.05046e+06	1.1974e+06	1.12252e+06	1.5227e+06	3.96874e+06	633833	1.31128e+06	1.26606e+06	2.06972e+06	951550	1.74011e+06	884435	914680
Q8CAA7	1	1	87.3	Glucose 1,6-bisphosphate synthase OS=Mus musculus GN=Pgm2l1 PE=1 SV=1	Pgm2l1	373476	349774	373476	153955	592214	298771	1.22263e+06	1.78093e+06	1.17546e+06	1.40443e+06	495702	547145	533118	569474	415166	1.01412e+06	425766	753012	867908	1.0161e+06	1.38796e+06	1.17628e+06	729861	1.0079e+06
Q921J2	1	1	79.93	GTP-binding protein Rheb OS=Mus musculus GN=Rheb PE=1 SV=1	Rheb	790960	1.00693e+06	790960	2.33912e+06	926866	1.25539e+06	5.11703e+06	6.52204e+06	157759	184448	2.01139e+06	2.86504e+06	1.75671e+06	1.2816e+06	1.94341e+06	3.01768e+06	1.74167e+06	2.59949e+06	2.90108e+06	3.83551e+06	4.22159e+06	3.83009e+06	3.35202e+06	2.79894e+06
P51863	1	1	55.67	V-type proton ATPase subunit d 1 OS=Mus musculus GN=Atp6v0d1 PE=1 SV=2	Atp6v0d1	560055	760870	560055	2.52068e+06	1.39613e+06	1.18354e+06	2.75246e+06	2.35246e+06	4.49653e+06	5.45904e+06	6.43056e+06	6.12693e+06	2.10325e+06	2.11245e+06	2.24399e+06	2.95236e+06	2.64279e+06	3.59072e+06	2.77456e+06	4.02331e+06	1.52814e+06	1.53939e+06	3.60019e+06	3.62064e+06
O35609	1	1	84.47	Secretory carrier-associated membrane protein 3 OS=Mus musculus GN=Scamp3 PE=1 SV=3	Scamp3	1.31813e+06	1.73242e+06	1.31813e+06	1.35909e+06	935372	1.50651e+06	717246	510632	896908	1.11273e+06	624761	646465	1.28854e+06	1.45644e+06	1.13307e+06	1.50153e+06	1.01518e+06	1.72041e+06	974389	1.7934e+06	1.31686e+06	1.62102e+06	3.15656e+06	3.0062e+06
Q8VEH3	1	1	73.78	ADP-ribosylation factor-like protein 8A OS=Mus musculus GN=Arl8a PE=1 SV=1	Arl8a	611668	785103	611668	2.41091e+06	1.08133e+06	1.23715e+06	407014	186656	81322	124772	96058.2	207304	892317	833404	1.02792e+06	1.8099e+06	510449	925660	2.44756e+06	3.32321e+06	2.15159e+06	618333	4.0521e+06	3.83117e+06
Q99LB6	1	1	68.32	Methionine adenosyltransferase 2 subunit beta OS=Mus musculus GN=Mat2b PE=1 SV=1	Mat2b	445513	868004	445513	1.0311e+06	1.03369e+06	1.24521e+06	92969.2	1.15155e+06	683684	915158	685885	849262	767172	1.37135e+06	1.03072e+06	1.56758e+06	469962	1.09366e+06	4.5441e+06	7.86201e+06	5.72533e+06	7.1489e+06	1.1658e+07	1.16857e+07
Q922R8	1	1	24.67	Protein disulfide-isomerase A6 OS=Mus musculus GN=Pdia6 PE=1 SV=3	Pdia6	1.84687e+06	2.03957e+06	1.84687e+06	1.94775e+06	1.52146e+06	1.68957e+06	1.10403e+06	831446	1.60271e+06	2.80426e+06	1.71147e+06	2.05941e+06	707358	833972	648567	165914	454063	813176	1.38808e+06	1.42926e+06	752469	992712	1.49165e+06	1.69663e+06
O70310	1	1	47.17	Glycylpeptide N-tetradecanoyltransferase 1 OS=Mus musculus GN=Nmt1 PE=1 SV=1	Nmt1	1.33364e+06	1.77626e+06	1.33364e+06	340146	969731	837989	0	0	0	0	0	0	83813	30741	404649	589552	3785.17	41688.8	0	0	0	0	0	0
P24270	1	1	40.55	Catalase OS=Mus musculus GN=Cat PE=1 SV=4	Cat	400033	556330	400033	809905	685884	651916	429101	450552	12464.3	58527.7	352188	30634.3	110845	178583	142146	53388	213432	214903	629372	316059	611080	542071	520976	705240
P58404	1	1	42.42	Striatin-4 OS=Mus musculus GN=Strn4 PE=1 SV=2	Strn4	9027.38	472853	9027.38	394136	466546	451473	430562	757529	756909	932062	525387	548989	490159	551625	455933	778056	452205	677322	634811	1.14238e+06	716875	1.03135e+06	927684	1.23279e+06
Q99PU5	1	1	75.48	Long-chain-fatty-acid--CoA ligase ACSBG1 OS=Mus musculus GN=Acsbg1 PE=1 SV=1	Acsbg1	1.13896e+06	1.49818e+06	1.13896e+06	1.83363e+06	1.0732e+06	1.01282e+06	703602	1.96577e+06	1.49019e+06	2.44652e+06	1.4087e+06	1.94977e+06	2.85533e+06	3.71713e+06	2.86772e+06	5.02254e+06	1.35291e+06	3.10591e+06	4.00941e+06	5.48613e+06	4.85157e+06	5.3374e+06	9.50854e+06	7.40609e+06
P55066	1	1	37.22	Neurocan core protein OS=Mus musculus GN=Ncan PE=1 SV=1	Ncan	1.1699e+06	1.63252e+06	1.1699e+06	2.65146e+06	937324	1.24602e+06	1.00948e+06	1.22001e+06	2.08635e+06	3.36481e+06	1.06223e+06	1.5206e+06	709551	619081	740161	1.58924e+06	846864	1.49106e+06	859173	844402	708378	1.06835e+06	446911	550017
Q14BB9	1	1	58.96	MAP6 domain-containing protein 1 OS=Mus musculus GN=Map6d1 PE=1 SV=1	Map6d1	1.25331e+06	1.8896e+06	1.25331e+06	1.08151e+06	338754	536814	62269.3	150012	924306	1.32611e+06	358693	526106	523493	763093	237366	226433	682924	956533	430114	194604	54259.1	106587	203881	203288
Q9DC07	1	1	66.81	LIM zinc-binding domain-containing Nebulette OS=Mus musculus GN=Nebl PE=1 SV=1	Nebl	319344	614163	319344	974385	430871	488881	463276	658422	5540.59	16456.8	757346	670531	375101	307978	204347	229600	383017	835578	405295	588785	1.08987e+06	1.35492e+06	704410	650250
Q9WV80	1	1	70.17	Sorting nexin-1 OS=Mus musculus GN=Snx1 PE=1 SV=1	Snx1	338199	469214	338199	1.13898e+06	918331	3020.47	776113	878571	811620	931284	361403	586064	967230	753423	1.40068e+06	2.47639e+06	589894	1.17489e+06	993458	1.72938e+06	1.35772e+06	1.91194e+06	1.64772e+06	3.24252e+06
Q9DB20	1	1	39.57	ATP synthase subunit O, mitochondrial OS=Mus musculus GN=Atp5o PE=1 SV=1	Atp5o	594168	855966	594168	992582	1.13139e+06	1.06991e+06	1.07744e+06	859670	546247	1.07566e+06	1.11933e+06	1.65728e+06	662029	753309	595517	1.1467e+06	194087	467395	669319	1.12521e+06	765967	1.17783e+06	1.71996e+06	2.35443e+06
Q8BH58	1	1	51.67	TIP41-like protein OS=Mus musculus GN=Tiprl PE=1 SV=1	Tiprl	526221	789658	526221	563734	678432	719081	460641	468654	1.52447e+06	2.11911e+06	1.4439e+06	1.13254e+06	523899	554313	689230	856179	670049	1.28685e+06	1.07057e+06	1.50908e+06	595439	491922	1.56444e+06	1.56395e+06
P86048	1	1	53.62	60S ribosomal protein L10-like OS=Mus musculus GN=Rpl10l PE=2 SV=1	Rpl10l	1.55469e+06	1.8468e+06	1.55469e+06	1.54837e+06	886080	837253	0	0	0	0	0	0	533250	266216	534385	341956	1.05758e+06	1.31845e+06	564602	634073	543698	278966	313526	430992
P60867	1	1	53.29	40S ribosomal protein S20 OS=Mus musculus GN=Rps20 PE=1 SV=1	Rps20	319578	482181	319578	842241	873205	913218	3.93464e+06	4.19328e+06	634811	1.11154e+06	1.60459e+06	1.8208e+06	1.27884e+06	1.27795e+06	2.39136e+06	4.54848e+06	930856	1.5966e+06	2.09101e+06	2.24442e+06	1.91324e+06	2.88508e+06	3.56837e+06	4.14602e+06
P62746	1	1	59.92	Rho-related GTP-binding protein RhoB OS=Mus musculus GN=Rhob PE=1 SV=1	Rhob	2.07522e+06	2.41616e+06	2.07522e+06	2.75621e+06	1.17056e+06	1.65265e+06	2.34762e+06	2.24242e+06	835359	1.19263e+06	1.78079e+06	1.90913e+06	667083	576444	615872	1.39973e+06	502452	990217	718733	1.21545e+06	1.56379e+06	1.87859e+06	1.99091e+06	2.01197e+06
Q9JHQ5	1	1	88.08	Leucine zipper transcription factor-like protein 1 OS=Mus musculus GN=Lztfl1 PE=1 SV=1	Lztfl1	1.13758e+06	1.58331e+06	1.13758e+06	1.97601e+06	1.67567e+06	3.16642e+06	1.98919e+06	1.41973e+06	1.12638e+06	2.12506e+06	525173	884251	1.31723e+06	1.71107e+06	1.41315e+06	2.59058e+06	628087	979333	3.51491e+06	3.90635e+06	3.74182e+06	3.8001e+06	3.79162e+06	4.4486e+06
Q9DCS2	1	1	30.81	UPF0585 protein C16orf13 homolog OS=Mus musculus PE=1 SV=1	1SV	2.93337e+06	3.50321e+06	2.93337e+06	2.75911e+06	1.05344e+06	2.1658e+06	163826	544263	3.26735e+06	4.95726e+06	833638	1.52142e+06	1.50722e+06	1.80675e+06	1.05188e+06	951826	1.77457e+06	2.64423e+06	2.12958e+06	326541	570343	760756	1.7446e+06	1.80805e+06
Q9R1T4	1	1	27.65	Septin-6 OS=Mus musculus GN=Sept6 PE=1 SV=4	2006-09-01	1.99363e+06	2.79658e+06	1.99363e+06	1.69363e+06	1.98475e+06	1.7423e+06	348559	922351	669719	1.09611e+06	558384	561662	270921	293380	448919	208915	600161	665075	105207	173102	1.98144e+06	786847	137887	21468.2
P97797	1	1	102.03	Tyrosine-protein phosphatase non-receptor type substrate 1 OS=Mus musculus GN=Sirpa PE=1 SV=1	Sirpa	4.08173e+06	5.07223e+06	4.08173e+06	3.90154e+06	2.44961e+06	3.00583e+06	673023	936421	1.99917e+06	2.18005e+06	1.65299e+06	1.61186e+06	2.0382e+06	1.71143e+06	1.71462e+06	3.23118e+06	1.48747e+06	3.51765e+06	1.19892e+06	1.46279e+06	2.13754e+06	1.79762e+06	3.22512e+06	2.70797e+06
P62858	1	1	31.87	40S ribosomal protein S28 OS=Mus musculus GN=Rps28 PE=1 SV=1	Rps28	2.66342e+06	5.59299e+06	2.66342e+06	5.07841e+06	2.42516e+06	3.29134e+06	2.79768e+06	2.96595e+06	881456	1.71335e+06	3.13412e+06	3.52095e+06	807829	487091	476285	573303	623705	1.10835e+06	1.95742e+06	3.64973e+06	1.53182e+06	1.23147e+06	2.13665e+06	2.5594e+06
P84078	1	1	59.06	ADP-ribosylation factor 1 OS=Mus musculus GN=Arf1 PE=1 SV=2	Arf1	486921	674834	486921	1.16898e+07	1.03381e+07	1.8943e+07	5.52491e+06	1.40406e+07	2.0114e+07	2.30953e+07	1.93761e+07	1.93714e+07	2.52483e+07	2.68001e+07	2.23413e+07	1.43278e+07	1.84461e+07	2.96659e+07	2.44542e+07	2.60626e+07	2.44951e+07	2.02184e+07	1.96224e+07	1.8245e+07
P59325	1	1	45.25	Eukaryotic translation initiation factor 5 OS=Mus musculus GN=Eif5 PE=1 SV=1	Eif5	1.089e+06	1.35754e+06	1.089e+06	1.85755e+06	832770	1.44108e+06	2.31131e+06	1.7963e+06	2.17802e+06	3.34112e+06	2.2641e+06	2.91608e+06	1.57999e+06	1.84182e+06	1.57426e+06	2.41293e+06	1.49238e+06	2.57546e+06	2.274e+06	3.38513e+06	2.03668e+06	2.41218e+06	3.46492e+06	2.79435e+06
P43024	1	1	79.75	Cytochrome c oxidase subunit 6A1, mitochondrial OS=Mus musculus GN=Cox6a1 PE=1 SV=2	Cox6a1	3.27443e+06	3.93508e+06	3.27443e+06	90991.6	45513.5	52981.2	3.74664e+06	3.32529e+06	31371	23027.4	8.56243e+06	7.87164e+06	1.82637e+06	1.68744e+06	1.81273e+06	305057	3.02941e+06	2.90023e+06	4.66215e+06	3.82649e+06	7.8035e+06	4.88085e+06	6.41377e+06	7.31157e+06
Q99LS3	1	1	39.62	Phosphoserine phosphatase OS=Mus musculus GN=Psph PE=1 SV=1	Psph	570131	815017	570131	1.37671e+06	1.00708e+06	778386	413.901	59.7325	0	1392.81	0	528338	210788	276644	81183.1	217896	213130	284784	553067	613614	1.23921e+06	802711	152810	264506
Q9CR68	1	1	20.07	Cytochrome b-c1 complex subunit Rieske, mitochondrial OS=Mus musculus GN=Uqcrfs1 PE=1 SV=1	Uqcrfs1	499314	636849	499314	698934	1.17765e+06	2.36109e+06	1.58733e+06	1.32509e+06	2.50987e+06	3.46972e+06	2.53538e+06	2.80197e+06	1.22692e+07	1.21769e+07	7.40231e+06	2.19439e+06	3.862e+06	4.13153e+06	4.40049e+06	6.52566e+06	5.67548e+06	6.03882e+06	9.09339e+06	8.66245e+06
Q924M7	1	1	52.93	Mannose-6-phosphate isomerase OS=Mus musculus GN=Mpi PE=1 SV=1	Mpi	5.47269e+06	6.71897e+06	5.47269e+06	4.72862e+06	3.41034e+06	5.06264e+06	2.03766e+06	1.01e+06	2.59883e+06	3.90098e+06	3.07827e+06	3.03968e+06	2.33596e+06	3.51375e+06	2.71751e+06	1.86833e+06	3.17447e+06	3.27827e+06	2.76774e+06	3.6756e+06	3.23424e+06	2.43002e+06	4.33947e+06	5.12256e+06
P62900	1	1	59.58	60S ribosomal protein L31 OS=Mus musculus GN=Rpl31 PE=1 SV=1	Rpl31	247821	274379	247821	477.366	5105.42	16001	0	0	0	0	0	0	0	0	0	0	0	0	0	0	0	0	0	0
P48024	1	1	37.66	Eukaryotic translation initiation factor 1 OS=Mus musculus GN=Eif1 PE=1 SV=2	Eif1	2.40299e+06	2.35906e+06	2.40299e+06	4.88793e+06	1.81104e+06	1.84246e+06	362061	507690	398290	670016	621176	780426	0	0	0	0	0	0	0	0	0	0	0	0
Q7M6Y3	1	1	80.3	Phosphatidylinositol-binding clathrin assembly protein OS=Mus musculus GN=Picalm PE=1 SV=1	Picalm	2.50665e+06	3.77334e+06	2.50665e+06	5.90858e+06	3.71182e+06	3.31238e+06	2.49475e+06	4.44206e+06	5.85565e+06	8.74851e+06	2.89921e+06	4.30988e+06	5.49814e+06	5.55842e+06	4.40902e+06	2.50418e+06	2.56088e+06	4.38822e+06	4.17438e+06	5.7438e+06	7.4439e+06	9.07282e+06	1.46257e+07	2.93507e+07
P22599	1	1	39.37	Alpha-1-antitrypsin 1-2 OS=Mus musculus GN=Serpina1b PE=1 SV=2	Serpina1b	916594	1.64207e+06	916594	2.0997e+06	1.77715e+06	2.65494e+06	0	0	0	0	0	0	814941	1.35208e+06	1.91487e+06	2.43397e+06	626481	751623	1.54629e+06	3.49375e+06	2.53527e+06	3.49862e+06	1.08477e+07	1.21504e+07
Q9WV69	1	1	88.6	Dematin OS=Mus musculus GN=Dmtn PE=1 SV=1	Dmtn	1.25267e+06	1.67415e+06	1.25267e+06	1.52457e+06	736888	978340	1.16233e+06	1.38172e+06	331670	503888	597463	696306	615545	510267	314043	235986	363390	529662	721408	1.15924e+06	1.02655e+06	1.34224e+06	238618	548970
Q3UUI3	1	1	70.03	Acyl-coenzyme A thioesterase THEM4 OS=Mus musculus GN=Them4 PE=1 SV=1	Them4	1.50697e+06	2.34975e+06	1.50697e+06	2.46578e+06	1.59089e+06	2.23864e+06	320587	867498	2.25324e+06	2.62118e+06	3.26315e+06	3.55068e+06	1.3836e+06	1.49902e+06	1.86723e+06	1.35159e+06	1.06453e+06	2.90966e+06	960254	1.58092e+06	974359	931244	1.49823e+06	1.79402e+06
Q8VC98	1	1	25.6	Pleckstrin homology domain-containing family A member 4 OS=Mus musculus GN=Plekha4 PE=2 SV=1	Plekha4	455710	624374	455710	603883	740344	793247	0	0	0	0	0	0	0	0	0	0	0	0	0	0	0	0	0	0
Q99N28	1	1	71.26	Cell adhesion molecule 3 OS=Mus musculus GN=Cadm3 PE=1 SV=1	Cadm3	1.13931e+06	1.54447e+06	1.13931e+06	2.73362e+06	2.42957e+06	3.20358e+06	4.92484e+06	4.12001e+06	3.13328e+06	4.08689e+06	886204	3.48123e+06	5.89798e+06	7.68713e+06	7.96135e+06	7.15745e+06	3.39487e+06	5.5996e+06	4.10756e+06	7.71996e+06	1.17159e+07	1.15543e+07	2.60879e+07	2.9968e+07
Q9D7G0	1	1	53.99	Ribose-phosphate pyrophosphokinase 1 OS=Mus musculus GN=Prps1 PE=1 SV=4	Prps1	1.34874e+06	2.00646e+06	1.34874e+06	2.05752e+06	1.6929e+06	753974	3.59233e+06	3.81839e+06	0	1949.57	673103	665583	392069	209599	803790	1.37314e+06	514957	682513	31287	120493	0	3161.95	0	23332.9
Q9WVK4	2	2	107.34	EH domain-containing protein 1 OS=Mus musculus GN=Ehd1 PE=1 SV=1	Ehd1	945435	1.20648e+06	945435	1.99704e+06	1.36108e+06	1.9063e+06	5.86652e+06	1.18319e+06	3.61012e+06	5.38296e+06	2.94033e+06	4.10333e+06	1.66081e+06	1.85055e+06	1.99128e+06	2.17335e+06	1.05496e+06	1.67986e+06	3.45166e+06	5.38331e+06	4.31607e+06	3.59933e+06	8.46543e+06	9.1579e+06
Q923T9	2	2	58.41	Calcium/calmodulin-dependent protein kinase type II subunit gamma OS=Mus musculus GN=Camk2g PE=1 SV=1	Camk2g	1.08729e+06	1.79916e+06	1.08729e+06	1.71967e+06	323136	415268	763575	632960	2.00243e+06	3.08739e+06	1.22515e+06	1.33731e+06	731847	780378	533499	588247	678324	1.46338e+06	569071	776299	625705	553321	840572	796584
P47911	2	2	105.83	60S ribosomal protein L6 OS=Mus musculus GN=Rpl6 PE=1 SV=3	Rpl6	393360	600773	393360	846363	796177	732594	3.09903e+06	1.861e+06	442632	789393	1.4217e+06	1.76748e+06	1.26543e+06	1.57749e+06	1.23204e+06	2.732e+06	640958	1.18821e+06	1.11529e+06	2.26302e+06	921445	1.66701e+06	2.08858e+06	2.26556e+06
Q9D1P4	2	2	84.03	Cysteine and histidine-rich domain-containing protein 1 OS=Mus musculus GN=Chordc1 PE=1 SV=1	Chordc1	2.87917e+06	2.9415e+06	2.87917e+06	3.19168e+06	1.79564e+06	1.43682e+06	590181	1.20939e+06	1.66472e+06	2.8899e+06	980482	1.64788e+06	1.27585e+06	1.0073e+06	840390	1.58126e+06	810493	1.45677e+06	2.97466e+06	3.82551e+06	1.04657e+06	1.55068e+06	4.44632e+06	4.67963e+06
P70441	2	2	104.1	Na(+)/H(+) exchange regulatory cofactor NHE-RF1 OS=Mus musculus GN=Slc9a3r1 PE=1 SV=3	Slc9a3r1	513225	649963	513225	271172	264363	252962	757717	1.03615e+06	205064	412874	629463	764125	241296	161638	465602	1.06408e+06	307148	612953	677936	1.30669e+06	606449	1.01163e+06	940581	1.32573e+06
Q62443	2	2	130.66	Neuronal pentraxin-1 OS=Mus musculus GN=Nptx1 PE=1 SV=1	Nptx1	853699	1.1726e+06	853699	1.60077e+06	1.17237e+06	1.61745e+06	369491	313501	2.1886e+06	2.53997e+06	219763	275019	1.47604e+06	1.79852e+06	839270	858703	795196	1.35301e+06	3.83124e+06	5.62137e+06	4.29707e+06	4.19565e+06	7.63515e+06	1.01735e+07
Q3V3V9	2	2	93.47	Capping protein, Arp2/3 and myosin-I linker protein 2 OS=Mus musculus GN=Carmil2 PE=1 SV=2	Carmil2	1.04136e+06	1.34627e+06	1.04136e+06	697266	227693	212607	62474.9	98908.8	1.2625e+06	1.92966e+06	798792	1.03189e+06	674900	535009	269835	175884	630677	1.1998e+06	280953	394675	51457.7	112937	211322	125580
P48962	2	2	145.03	ADP/ATP translocase 1 OS=Mus musculus GN=Slc25a4 PE=1 SV=4	Slc25a4	11179.3	22428.4	11179.3	725360	738516	624345	0	0	0	0	0	0	0	0	0	0	0	0	0	0	0	0	0	0
Q8VIM9	2	2	101.26	Immunity-related GTPase family Q protein OS=Mus musculus GN=Irgq PE=1 SV=1	Irgq	1.30322e+06	1.67405e+06	1.30322e+06	1.16971e+06	124978	257459	732355	719789	3.09759e+06	3.6945e+06	2.73862e+06	1.07319e+06	1.07506e+06	1.23056e+06	1.45737e+06	1.58566e+06	892993	1.22439e+06	1.76203e+06	1.75477e+06	2.34298e+06	1.94502e+06	2.21585e+06	454538
Q920P5	2	2	51.1	Adenylate kinase isoenzyme 5 OS=Mus musculus GN=Ak5 PE=1 SV=2	Ak5	483782	863767	483782	377169	694517	788337	1.06043e+06	1.10693e+06	726636	1.13184e+06	284859	285982	601715	536885	826065	1.14541e+06	405213	582961	1.07253e+06	1.11832e+06	1.16255e+06	1.15085e+06	1.33332e+06	2.1212e+06
Q9Z0F7	2	2	165.16	Gamma-synuclein OS=Mus musculus GN=Sncg PE=1 SV=1	Sncg	403310	519880	403310	1.36814e+06	834487	888458	1.29308e+06	1.09597e+06	488444	408742	948101	127888	1.27879e+06	1.04374e+06	812507	1.33804e+06	775899	1.27467e+06	2.33401e+06	3.81507e+06	7.24763e+06	4.90287e+06	4.28008e+06	5.27304e+06
Q8BK64	2	2	131.28	Activator of 90 kDa heat shock protein ATPase homolog 1 OS=Mus musculus GN=Ahsa1 PE=1 SV=2	Ahsa1	520326	619309	520326	2.31107e+06	418957	477061	1.08264e+06	2.67237e+06	2.29256e+06	3.50991e+06	1.75967e+06	3.13851e+06	2.03033e+06	2.33647e+06	3.75234e+06	3.81222e+06	1.76208e+06	2.58984e+06	2.81608e+06	4.27071e+06	2.70636e+06	2.93839e+06	7.85168e+06	9.57876e+06
Q8JZS0	2	2	147.71	Protein lin-7 homolog A OS=Mus musculus GN=Lin7a PE=1 SV=2	Lin7a	589252	774781	589252	45133.6	33907.5	5235.98	499250	401443	264078	456623	192889	241750	612591	1.02368e+06	977166	2.75144e+06	392754	802067	262858	484775	209078	474413	350755	308260
A2AJI0	2	2	96.45	MAP7 domain-containing protein 1 OS=Mus musculus GN=Map7d1 PE=1 SV=1	Map7d1	472182	564259	472182	74469.2	23837.9	854.326	0	0	0	0	0	0	0	0	0	0	0	0	0	0	0	0	0	0
Q61151	2	2	109.91	Serine/threonine-protein phosphatase 2A 56 kDa regulatory subunit epsilon isoform OS=Mus musculus GN=Ppp2r5e PE=1 SV=3	Ppp2r5e	603931	1.92739e+06	603931	2.28141e+06	2.20213e+06	2.80111e+06	1.94371e+06	3.81749e+06	653733	805112	2.15505e+06	2.43347e+06	1.9222e+06	2.20789e+06	1.33296e+06	3.12407e+06	1.2141e+06	2.36131e+06	1.71537e+06	2.77835e+06	2.77822e+06	2.57493e+06	3.01766e+06	2.98171e+06
P62830	2	2	70.77	60S ribosomal protein L23 OS=Mus musculus GN=Rpl23 PE=1 SV=1	Rpl23	1.4187e+06	1.76237e+06	1.4187e+06	2.36001e+06	1.19885e+06	1.95008e+06	2.77714e+06	2.12271e+06	1.99046e+06	3.3263e+06	2.05204e+06	2.67006e+06	1.90068e+06	2.05503e+06	2.39015e+06	2.03719e+06	1.29994e+06	2.00948e+06	1.74402e+06	2.20156e+06	2.59004e+06	1.91774e+06	3.95936e+06	3.85042e+06
Q8BLK3	2	2	70.36	Limbic system-associated membrane protein OS=Mus musculus GN=Lsamp PE=1 SV=1	Lsamp	301717	400356	301717	403867	758447	772530	0	0	0	0	0	0	1.59302e+06	2.6889e+06	2.27385e+06	5.92544e+06	946634	1.68276e+06	2.60623e+06	5.29e+06	5.86435e+06	5.5655e+06	7.61781e+06	9.75176e+06
Q6IRU5	2	2	99.25	Clathrin light chain B OS=Mus musculus GN=Cltb PE=1 SV=1	Cltb	868495	1.34975e+06	868495	296553	820225	978997	1.35543e+07	1.27632e+07	1.16425e+07	1.71327e+07	1.29552e+07	1.21738e+07	36908.9	18235.1	13269.8	251654	72035.6	105145	0	0	0	0	0	0
Q91VZ6	2	2	75.65	Stromal membrane-associated protein 1 OS=Mus musculus GN=Smap1 PE=1 SV=1	Smap1	1.51966e+06	1.82854e+06	1.51966e+06	508514	27414.3	12645.8	0	0	0	0	0	0	0	0	0	0	0	0	138060	217673	13223.5	37627	22025	71779.2
P47955	2	2	91.39	60S acidic ribosomal protein P1 OS=Mus musculus GN=Rplp1 PE=1 SV=1	Rplp1	2.68923e+06	3.46578e+06	2.68923e+06	9.18708e+06	725476	4.72719e+06	5.48599e+06	8.8714e+06	1.28702e+07	1.45224e+07	1.09008e+07	1.3493e+07	5.73974e+06	6.74238e+06	6.40773e+06	3.43071e+06	5.44364e+06	6.27688e+06	1.41375e+07	1.50687e+07	1.62616e+07	1.65615e+07	1.33884e+07	2.19621e+07
P43006	2	2	181.88	Excitatory amino acid transporter 2 OS=Mus musculus GN=Slc1a2 PE=1 SV=1	Slc1a2	1.31748e+06	2.307e+06	1.31748e+06	2035.93	254608	441990	0	0	0	0	0	0	0	0	0	0	0	0	0	0	0	0	0	0
P61750	2	2	78.62	ADP-ribosylation factor 4 OS=Mus musculus GN=Arf4 PE=1 SV=2	Arf4	1.10983e+06	1.44154e+06	1.10983e+06	4.78564e+06	1.61175e+06	1.89908e+06	0	0	0	0	0	0	2.96748e+06	3.77697e+06	3.34582e+06	4.85711e+06	3.3703e+06	4.91043e+06	4.72154e+06	8.26508e+06	4.85865e+06	5.63566e+06	6.32545e+06	5.77198e+06
P61294	2	1	89.13	Ras-related protein Rab-6B OS=Mus musculus GN=Rab6b PE=1 SV=1	Rab6b	32215.5	39339.5	32215.5	187834	37648.6	37367.1	378696	416236	546465	884872	711697	731145	227956	340195	337428	567173	195374	380574	242727	440338	263758	349393	459182	650114
P06837	2	2	58.16	Neuromodulin OS=Mus musculus GN=Gap43 PE=1 SV=1	Gap43	1.89123e+06	3.81422e+06	1.89123e+06	1.6777e+06	198678	3.00648e+06	0	0	0	0	0	0	3792.11	3140.46	8817.23	0	208749	150952	0	0	0	0	0	0
Q8R3Q2	2	2	80.69	Serine/threonine-protein phosphatase 6 regulatory subunit 2 OS=Mus musculus GN=Ppp6r2 PE=1 SV=1	Ppp6r2	2.52369e+06	3.5718e+06	2.52369e+06	2.89609e+06	4.85719e+06	5.97949e+06	4.50516e+06	3.52416e+06	2.73343e+06	4.16404e+06	1.90939e+06	2.03416e+06	2.69096e+06	2.76237e+06	2.06475e+06	2.12351e+06	1.87161e+06	2.82222e+06	1.92412e+06	2.86754e+06	1.88886e+06	1.62526e+06	4.02679e+06	3.87937e+06
Q9CYZ2	2	2	194.67	Tumor protein D54 OS=Mus musculus GN=Tpd52l2 PE=1 SV=1	Tpd52l2	426149	601675	426149	996243	1.2467e+06	1.41758e+06	2.45783e+06	3.11576e+06	665421	1.19012e+06	1.12212e+06	1.39366e+06	1.59792e+06	1.92604e+06	1.443e+06	3.49301e+06	670086	718824	2.12782e+06	3.61224e+06	4.05365e+06	5.92183e+06	5.48972e+06	6.68739e+06
P62242	2	2	173.15	40S ribosomal protein S8 OS=Mus musculus GN=Rps8 PE=1 SV=2	Rps8	697408	930504	697408	2.03201e+06	1.08755e+06	1.12348e+06	3.08253e+06	2.56918e+06	2.01819e+06	3.12975e+06	2.39866e+06	3.48264e+06	1.96721e+06	2.80656e+06	2.3045e+06	4.17718e+06	1.61658e+06	2.77178e+06	2.01062e+06	3.17424e+06	2.58767e+06	2.67277e+06	3.72504e+06	4.90117e+06
Q9CXW4	2	2	96.63	60S ribosomal protein L11 OS=Mus musculus GN=Rpl11 PE=1 SV=4	Rpl11	941319	1.22351e+06	941319	2.43405e+06	1.89236e+06	1.52129e+06	4.5709e+06	3.53875e+06	2.42185e+06	3.33416e+06	2.26453e+06	2.9581e+06	2.23001e+06	3.25852e+06	2.31675e+06	5.07642e+06	1.33595e+06	2.6127e+06	2.03625e+06	3.43942e+06	3.28266e+06	4.29204e+06	2.75776e+06	3.80613e+06
Q62393	2	2	110.61	Tumor protein D52 OS=Mus musculus GN=Tpd52 PE=1 SV=2	Tpd52	976879	1.19397e+06	976879	1.61175e+06	712343	887544	1.01117e+06	1.3615e+06	694778	922197	1.1321e+06	1.39162e+06	542864	710817	816650	1.02043e+06	399152	633721	626526	1.08451e+06	1.00249e+06	828889	1.7882e+06	1.865e+06
P62264	2	2	112.07	40S ribosomal protein S14 OS=Mus musculus GN=Rps14 PE=1 SV=3	Rps14	1.65277e+06	2.06582e+06	1.65277e+06	2.60325e+06	1.03559e+06	1.03566e+06	1.45601e+06	2.09695e+06	161421	324156	1.25126e+06	1.71528e+06	575004	369683	421763	980493	389172	873579	1.73748e+06	2.9715e+06	1.79532e+06	2.30236e+06	2.15572e+06	3.32024e+06
Q9D8S9	2	2	132.75	BolA-like protein 1 OS=Mus musculus GN=Bola1 PE=1 SV=1	Bola1	395593	457182	395593	542479	1.3438e+06	1.0814e+06	8.5991e+06	6.57611e+06	1.48618e+06	2.47968e+06	1.93073e+06	1.90132e+06	4.83972e+06	4.7214e+06	5.2558e+06	1.19984e+07	2.37728e+06	2.85117e+06	5.11763e+06	5.17119e+06	8.70912e+06	1.08074e+07	6.1329e+06	7.21488e+06
P21460	2	2	94.2	Cystatin-C OS=Mus musculus GN=Cst3 PE=1 SV=2	Cst3	1.49178e+06	2.05439e+06	1.49178e+06	984990	826285	1.08225e+06	1.51257e+06	1.80882e+06	301284	453034	994722	1.37769e+06	1.09454e+06	839814	1.06365e+06	1.70235e+06	784300	1.43504e+06	1.19604e+06	2.17255e+06	1.47145e+06	1.72153e+06	1.00852e+06	1.00088e+06
Q00612	2	2	144.1	Glucose-6-phosphate 1-dehydrogenase X OS=Mus musculus GN=G6pdx PE=1 SV=3	G6pdx	76524.4	151781	76524.4	577753	66106.6	114545	961657	728324	888046	1.67912e+06	993313	1.48015e+06	782218	573275	892093	1.67197e+06	523572	999621	824918	1.48492e+06	1.05137e+06	1.14099e+06	1.86295e+06	1.88452e+06
O35685	2	2	70.61	Nuclear migration protein nudC OS=Mus musculus GN=Nudc PE=1 SV=1	Nudc	307190	463179	307190	1.02232e+06	549047	616186	645293	1.13493e+06	932877	1.00066e+06	1.98989e+06	1.85595e+06	1.62937e+06	1.63262e+06	599428	395657	876526	1.23994e+06	0	0	0	0	0	0
P47708	2	2	230.03	Rabphilin-3A OS=Mus musculus GN=Rph3a PE=1 SV=2	Rph3a	574088	980286	574088	1.06298e+06	463571	651784	1.01121e+06	439925	1.03779e+06	2.24441e+06	983505	1.50739e+06	826851	463664	643493	741859	1.06643e+06	1.7218e+06	1.39841e+06	1.54141e+06	903148	1.44602e+06	1.26796e+06	1.57509e+06
P28665	2	2	68.08	Murinoglobulin-1 OS=Mus musculus GN=Mug1 PE=1 SV=3	Mug1	673000	793164	673000	1.27886e+06	558731	482431	237816	315417	72269	163674	303743	430803	331986	463710	481964	620268	714562	404522	1.12112e+06	1.15677e+06	1.41073e+06	1.2911e+06	2.01292e+06	2.05711e+06
O35633	2	1	113.16	Vesicular inhibitory amino acid transporter OS=Mus musculus GN=Slc32a1 PE=1 SV=3	Slc32a1	739317	769938	739317	163715	136845	72377.5	0	0	0	0	0	0	0	0	0	0	0	0	0	0	0	0	0	0
O35551	2	2	103.6	Rab GTPase-binding effector protein 1 OS=Mus musculus GN=Rabep1 PE=1 SV=2	Rabep1	380945	483895	380945	3408.83	39711.3	1860.61	289936	319038	756871	914382	559249	711238	94311.2	119436	68884.2	347285	31731.6	91062.8	15658.6	74699.4	16479.4	84433.6	107768	110406
Q8BL66	2	2	109.08	Early endosome antigen 1 OS=Mus musculus GN=Eea1 PE=1 SV=2	Eea1	400069	452159	400069	643469	460275	335199	1.27439e+06	1.2063e+06	423709	772589	599164	485002	421636	337001	757332	1.18387e+06	337445	492855	767714	996186	728237	951359	1.21971e+06	1.21284e+06
Q91X97	2	2	93.42	Neurocalcin-delta OS=Mus musculus GN=Ncald PE=1 SV=4	Ncald	145718	238160	145718	730271	453773	530072	165817	276501	331294	539041	618929	680309	524232	575595	622768	469430	391167	590725	745916	1.30274e+06	643313	672424	1.33197e+06	1.37464e+06
O70194	2	2	64.17	Eukaryotic translation initiation factor 3 subunit D OS=Mus musculus GN=Eif3d PE=1 SV=2	Eif3d	243150	340653	243150	754119	381939	293862	0	0	0	0	0	0	212875	267228	116819	196786	244123	346406	216514	375835	84374.7	119097	232579	216766
O09131	2	2	73.32	Glutathione S-transferase omega-1 OS=Mus musculus GN=Gsto1 PE=1 SV=2	Gsto1	112103	140523	112103	651806	513163	574651	1.50384e+06	2.05648e+06	317148	608138	138257	396814	725253	437452	1.58669e+06	2.76597e+06	371098	782951	1.84222e+06	2.13441e+06	1.71386e+06	2.22501e+06	3.01352e+06	2.91729e+06
Q9JHW2	2	2	163.81	Omega-amidase NIT2 OS=Mus musculus GN=Nit2 PE=1 SV=1	Nit2	165150	254294	165150	355294	521803	632405	135003	46856.4	13293.4	35801.8	286116	258193	835605	905852	1.01707e+06	1.58579e+06	516543	803335	745229	1.32531e+06	1.16577e+06	1.04086e+06	1.93892e+06	2.3394e+06
O88735	2	2	90.07	Ensconsin OS=Mus musculus GN=Map7 PE=1 SV=1	Map7	179514	355398	179514	213910	138595	204474	0	0	0	0	0	0	46499.8	44590.9	19450.9	55212.7	61973.5	128109	91462.1	185537	34536.9	76145.5	35019.1	19076.4
Q9JLZ3	2	2	80.03	Methylglutaconyl-CoA hydratase, mitochondrial OS=Mus musculus GN=Auh PE=1 SV=1	Auh	345894	377665	345894	192449	492187	528443	1.90482e+06	1.78817e+06	861803	1.65906e+06	1.06265e+06	1.21796e+06	1.19612e+06	695173	1.84357e+06	3.9487e+06	496587	957801	2.55501e+06	4.56915e+06	2.76259e+06	3.25282e+06	2.38595e+06	3.13372e+06
P12023	2	2	95.79	Amyloid beta A4 protein OS=Mus musculus GN=App PE=1 SV=3	App	297892	353380	297892	1.30751e+06	778891	547526	743523	814955	831099	1.75216e+06	518554	704089	399448	645256	462451	983123	671358	946773	1.30434e+06	1.97139e+06	1.11143e+06	1.14636e+06	1.15288e+06	975311
Q91YR1	2	2	98.04	Twinfilin-1 OS=Mus musculus GN=Twf1 PE=1 SV=2	Twf1	491994	423627	491994	708977	422695	448911	119169	79387.9	2.50895e+06	3.26164e+06	333744	136321	994957	1.037e+06	1.41977e+06	1.31382e+06	704854	1.02979e+06	1.75381e+06	2.34215e+06	1.4786e+06	1.30269e+06	4.39187e+06	3.6467e+06
Q9QUR6	2	2	97.7	Prolyl endopeptidase OS=Mus musculus GN=Prep PE=1 SV=1	Prep	349730	407646	349730	674041	405527	347417	517672	644708	371749	561321	686242	777052	341896	251402	426234	486962	293492	535360	396302	658453	394215	490978	595229	491388
Q641P0	2	2	111.03	Actin-related protein 3B OS=Mus musculus GN=Actr3b PE=1 SV=1	Actr3b	161909	214935	161909	955783	1545.6	69511.3	537472	268240	550075	906824	807537	468149	893241	1.23041e+06	865733	1.20027e+06	500991	574914	1.65419e+06	1.86757e+06	3.74342e+06	3.29499e+06	3.17663e+06	2.33781e+06
Q8VEJ9	2	2	79.35	Vacuolar protein sorting-associated protein 4A OS=Mus musculus GN=Vps4a PE=1 SV=1	Vps4a	200608	211597	200608	405036	247026	287674	2.28192e+06	2.72163e+06	1.01378e+06	1.8415e+06	658465	947262	1.01107e+06	899921	1.54984e+06	3.3351e+06	501719	963587	1.17478e+06	1.88694e+06	1.90287e+06	2.36584e+06	3.29399e+06	2.90435e+06
Q61234	2	2	76.6	Alpha-1-syntrophin OS=Mus musculus GN=Snta1 PE=1 SV=1	Snta1	254108	335622	254108	379448	295296	231952	120722	73208.1	103954	172677	86044.6	116951	146751	145341	87176	230095	138377	194826	0	0	0	0	0	0
Q80VP1	2	2	175.66	Epsin-1 OS=Mus musculus GN=Epn1 PE=1 SV=3	Epn1	309182	491463	309182	968056	237181	281759	1.66511e+06	2.19925e+06	3.65212e+06	5.21321e+06	3.39404e+06	3.95007e+06	1.40645e+06	2.29239e+06	1.29676e+06	1.74568e+06	1.46443e+06	1.95297e+06	2.4444e+06	2.85013e+06	3.63333e+06	2.87282e+06	2.96052e+06	3.32786e+06
Q8BGT8	2	2	135.96	Phytanoyl-CoA hydroxylase-interacting protein-like OS=Mus musculus GN=Phyhipl PE=1 SV=1	Phyhipl	236887	268653	236887	53790.1	2914.77	17621.6	0	0	0	0	0	0	0	0	0	0	0	0	14931.9	0	4610.9	22266.5	0	0
Q61838	2	2	62.47	Pregnancy zone protein OS=Mus musculus GN=Pzp PE=1 SV=3	Pzp	290524	309264	290524	794380	48057.4	132640	206768	612179	556005	541868	1.33731e+06	1.33595e+06	1.23037e+06	1.31425e+06	1.20397e+06	863587	634982	848856	2.18613e+06	1.94907e+06	2.69407e+06	1.99875e+06	1.75706e+06	1.15866e+06
Q8VHH5	2	2	97.2	Arf-GAP with GTPase, ANK repeat and PH domain-containing protein 3 OS=Mus musculus GN=Agap3 PE=1 SV=1	Agap3	382964	503596	382964	327339	247697	361895	61952.4	148602	204.081	912.892	132954	86137.1	0	0	0	0	0	0	0	0	0	0	0	0
Q3U5Q7	2	2	87.01	UMP-CMP kinase 2, mitochondrial OS=Mus musculus GN=Cmpk2 PE=1 SV=2	Cmpk2	208019	258141	208019	122485	103744	156705	565468	574038	50488.2	85976.8	124930	217570	2.41852e+07	1.93537e+07	1.68949e+07	2.79416e+07	2.89632e+07	4.5741e+07	678457	773845	366514	707763	1.32033e+06	2.34245e+06
Q62059	2	2	83.27	Versican core protein OS=Mus musculus GN=Vcan PE=1 SV=2	Vcan	46286.3	115363	46286.3	255270	383836	383809	652424	592580	0	12373.1	207840	297032	234233	314537	203063	492390	49667.9	139515	189791	417730	111225	294839	468136	426932
P36916	2	2	104.2	Guanine nucleotide-binding protein-like 1 OS=Mus musculus GN=Gnl1 PE=1 SV=4	Gnl1	121976	171315	121976	335987	112581	96846.1	322462	415043	177649	355974	335726	216596	399161	482053	373089	657559	227272	470835	158240	298264	272729	325792	370986	353116
Q9D3D9	2	2	84.93	ATP synthase subunit delta, mitochondrial OS=Mus musculus GN=Atp5d PE=1 SV=1	Atp5d	164362	121305	164362	217883	96681	95177.3	112274	35692.8	64625.9	55410.7	890399	897923	236550	216446	106597	298190	226868	409949	0	0	0	0	0	0
Q8C5H8	2	2	101.1	NAD kinase 2, mitochondrial OS=Mus musculus GN=Nadk2 PE=1 SV=2	Nadk2	240454	310172	240454	555205	479816	490786	794840	760071	204564	338842	488392	761081	379028	546834	631637	1.23132e+06	207687	474454	177351	417041	88314	108825	527307	154433
Q7TPR4	2	2	102.48	Alpha-actinin-1 OS=Mus musculus GN=Actn1 PE=1 SV=1	Actn1	88921.5	81388.8	88921.5	577539	283642	358472	921817	1.03395e+06	313067	607521	510773	648787	334904	145943	1.07786e+06	2.26892e+06	186070	377919	868016	1.25195e+06	917993	1.35682e+06	2.26943e+06	2.8056e+06
O35127	2	2	81.68	Protein C10 OS=Mus musculus GN=Grcc10 PE=1 SV=1	Grcc10	139314	239465	139314	633524	138898	131334	72370.6	189582	1.00277e+06	1.43193e+06	103926	123008	233399	173625	130959	166464	224912	509480	200399	469794	226799	334339	283721	354457
Q9CY58	2	2	53.47	Plasminogen activator inhibitor 1 RNA-binding protein OS=Mus musculus GN=Serbp1 PE=1 SV=2	Serbp1	261596	392281	261596	2.27323e+06	589069	1.61752e+06	649014	1.04417e+06	1.9891e+06	1.9484e+06	2.23559e+06	1.92724e+06	2.80109e+06	3.3276e+06	1.94183e+06	173101	2.36754e+06	2.73317e+06	1.05195e+07	1.0407e+07	9.20506e+06	7.5634e+06	2.20075e+06	6.49749e+06
A2RT62	2	2	124.29	F-box/LRR-repeat protein 16 OS=Mus musculus GN=Fbxl16 PE=1 SV=1	Fbxl16	232178	342444	232178	534131	229084	305542	413770	1.50802e+06	650783	969914	316957	318659	237382	319919	322276	483078	312359	383156	587656	1.00552e+06	450288	416890	603262	504735
Q91ZA3	2	2	70.47	Propionyl-CoA carboxylase alpha chain, mitochondrial OS=Mus musculus GN=Pcca PE=1 SV=2	Pcca	425277	594527	425277	187647	312817	345156	495342	408444	596150	975272	793664	963542	751463	754626	859093	728637	239276	901468	395269	144295	232413	244251	706986	851305
Q8BIJ6	2	2	129.55	Isoleucine--tRNA ligase, mitochondrial OS=Mus musculus GN=Iars2 PE=1 SV=1	Iars2	95879.1	190268	95879.1	603833	120348	404444	416946	482852	658440	1.25998e+06	625880	884196	585599	711102	666751	655515	320180	625596	707877	1.15105e+06	1.68366e+06	1.42719e+06	697305	412859
Q61035	2	2	77.17	Histidine--tRNA ligase, cytoplasmic OS=Mus musculus GN=Hars PE=1 SV=2	Hars	621390	618649	621390	1.41089e+06	314587	246988	1.24725e+06	658182	828318	1.19717e+06	989806	1.48122e+06	1.0902e+06	1.82892e+06	1.16158e+06	1.70308e+06	682267	892282	1.17803e+06	2.12223e+06	2.99452e+06	2.96267e+06	990424	134829
Q9D1E6	2	2	169.7	Tubulin-folding cofactor B OS=Mus musculus GN=Tbcb PE=1 SV=2	Tbcb	810288	820919	810288	196319	199266	97516	419922	445255	0	0	456883	562768	277967	179848	245883	480651	386348	630844	301016	665980	268087	385523	133943	166712
Q9CQR2	2	2	195.92	40S ribosomal protein S21 OS=Mus musculus GN=Rps21 PE=1 SV=1	Rps21	624391	820608	624391	18636.8	26463.2	25906.2	0	0	0	0	0	0	0	0	0	0	0	0	0	0	0	0	0	0
Q91V41	2	2	96.97	Ras-related protein Rab-14 OS=Mus musculus GN=Rab14 PE=1 SV=3	Rab14	232603	284357	232603	762616	302123	3495.41	1.96994e+06	2.10516e+06	3.24503e+06	3.65919e+06	2.25356e+06	2.37677e+06	1.052e+06	973578	1.07628e+06	1.93213e+06	940309	1.88589e+06	977333	2.18214e+06	1.23113e+06	1.52951e+06	3.4356e+06	2.52459e+06
P14211	2	2	136.67	Calreticulin OS=Mus musculus GN=Calr PE=1 SV=1	Calr	232164	353973	232164	650523	904244	1.50265e+06	501198	1.52842e+06	355600	525088	837989	1.25222e+06	747146	1.31423e+06	647045	568702	618668	792961	1.89385e+06	2.28032e+06	2.17705e+06	2.91945e+06	1.23956e+06	101718
Q8R366	2	2	108.27	Immunoglobulin superfamily member 8 OS=Mus musculus GN=Igsf8 PE=1 SV=2	Igsf8	691924	813358	691924	1.13175e+06	492965	759249	1.30307e+06	1.07948e+06	908207	1.91746e+06	1.73702e+06	1.57736e+06	1.03857e+06	1.23355e+06	1.36147e+06	2.13524e+06	759828	1.2484e+06	817330	1.56537e+06	2.07792e+06	2.06165e+06	2.06861e+06	2.73324e+06
P42125	2	2	107.03	Enoyl-CoA delta isomerase 1, mitochondrial OS=Mus musculus GN=Eci1 PE=1 SV=2	Eci1	267876	348428	267876	893829	393475	447791	1.88211e+06	3.43437e+06	2.87125e+06	3.56824e+06	2.09287e+06	2.39425e+06	3.30238e+06	3.86499e+06	3.36907e+06	1.61424e+06	1.80431e+06	3.14179e+06	2.36873e+06	4.25735e+06	2.39746e+06	2.40821e+06	6.501e+06	5.4543e+06
Q9QYB1	2	2	74.59	Chloride intracellular channel protein 4 OS=Mus musculus GN=Clic4 PE=1 SV=3	Clic4	408080	433104	408080	1.34416e+06	525727	464356	293054	299867	107520	50847.6	1.97486e+06	161608	839934	584063	991424	943791	876958	1.4903e+06	1.43332e+06	2.63798e+06	1.28752e+06	901308	2.71087e+06	2.57697e+06
Q8K212	2	2	62.48	Phosphofurin acidic cluster sorting protein 1 OS=Mus musculus GN=Pacs1 PE=1 SV=2	Pacs1	741036	649849	741036	3723.06	67796.8	83953.3	771253	914847	24009.4	33273.6	551383	716927	0	0	0	0	0	0	0	0	0	0	0	0
P26040	2	2	82.33	Ezrin OS=Mus musculus GN=Ezr PE=1 SV=3	Ezr	361005	448956	361005	258219	97778.6	182213	0	0	0	0	0	0	327207	169265	352123	438054	193778	250420	0	0	0	0	0	0
A2ALS5	2	2	113.35	Rap1 GTPase-activating protein 1 OS=Mus musculus GN=Rap1gap PE=1 SV=2	Rap1gap	412469	599342	412469	778060	503914	625688	422280	599464	1.98558e+06	3.21749e+06	2.19258e+06	1.67196e+06	751842	595828	989465	1.42504e+06	486917	1.21465e+06	1.21067e+06	1.78618e+06	915404	1.29531e+06	2.09068e+06	2.1419e+06
Q2NL51	2	2	168.95	Glycogen synthase kinase-3 alpha OS=Mus musculus GN=Gsk3a PE=1 SV=2	Gsk3a	446441	650161	446441	893585	368136	640643	1.49413e+06	973834	1.16237e+06	1.84585e+06	838954	1.3459e+06	342319	276997	578394	709722	464570	654039	0	0	0	0	0	0
Q8QZV4	2	2	75.63	Serine/threonine-protein kinase 32C OS=Mus musculus GN=Stk32c PE=1 SV=1	Stk32c	1.03191e+06	1.29069e+06	1.03191e+06	1.31587e+06	792568	951030	0	0	0	0	0	0	0	0	0	0	0	0	0	0	0	0	0	0
G5E829	2	2	111.08	Plasma membrane calcium-transporting ATPase 1 OS=Mus musculus GN=Atp2b1 PE=1 SV=1	Atp2b1	224993	409629	224993	246992	167003	141817	499322	370744	222673	516139	562560	418030	131584	82653.2	115394	202784	97857	261464	0	0	0	0	0	0
Q3TW96	2	2	86.5	UDP-N-acetylhexosamine pyrophosphorylase-like protein 1 OS=Mus musculus GN=Uap1l1 PE=1 SV=1	Uap1l1	598968	590706	598968	770171	331473	434460	531334	445856	270978	546933	497242	641867	439945	622092	511398	372325	196631	455369	536905	804769	492753	444526	1.19203e+06	1.46625e+06
Q99KR7	2	2	120.96	Peptidyl-prolyl cis-trans isomerase F, mitochondrial OS=Mus musculus GN=Ppif PE=1 SV=1	Ppif	736855	1.09668e+06	736855	1.03456e+06	753166	687756	1.26688e+06	1.32123e+06	967530	1.62489e+06	1.55801e+06	1.75452e+06	668019	505600	600703	1.69332e+06	518273	926242	853053	1.40652e+06	711036	996827	1.67639e+06	1.5922e+06
Q9CQ75	2	2	87	NADH dehydrogenase [ubiquinone] 1 alpha subcomplex subunit 2 OS=Mus musculus GN=Ndufa2 PE=1 SV=3	Ndufa2	538067	619324	538067	821391	520030	725547	2.80253e+06	2.48653e+06	604653	976081	1.89255e+06	1.83311e+06	697229	690656	531896	1.03126e+06	416939	786222	832160	1.33425e+06	897508	1.18802e+06	1.36967e+06	1.3998e+06
Q99LD8	2	2	85.99	N(G),N(G)-dimethylarginine dimethylaminohydrolase 2 OS=Mus musculus GN=Ddah2 PE=1 SV=1	Ddah2	317103	577681	317103	2.18254e+06	431308	510982	481756	161928	1.22107e+06	1.62932e+06	2.23789e+06	1.60687e+06	2.2964e+06	2.40137e+06	3.44105e+06	4.39843e+06	2.10182e+06	2.80741e+06	2.60788e+06	3.82384e+06	2.57885e+06	1.77025e+06	7.54944e+06	7.42094e+06
Q8BZA9	2	2	56.13	Fructose-2,6-bisphosphatase TIGAR OS=Mus musculus GN=Tigar PE=1 SV=1	Tigar	114341	326762	114341	602527	95375.2	232539	278818	278248	466881	722943	714358	854903	0	0	0	0	0	0	467852	1.0165e+06	610199	452485	588704	782173
Q91VR2	2	2	70.7	ATP synthase subunit gamma, mitochondrial OS=Mus musculus GN=Atp5c1 PE=1 SV=1	Atp5c1	118657	283529	118657	513347	192170	201062	308661	76086.8	197335	327316	321635	210395	0	0	1006.79	143.945	8375.91	175.329	376439	421935	729646	679706	323056	51240.5
P62267	2	2	95.21	40S ribosomal protein S23 OS=Mus musculus GN=Rps23 PE=1 SV=3	Rps23	69711.7	113603	69711.7	1.36216e+06	533586	683263	2.14372e+06	1.97011e+06	43578.9	38202.9	1.05403e+06	1.00299e+06	1.33874e+06	1.18808e+06	1.10751e+06	88710.5	1.92242e+06	1.74204e+06	1.45778e+06	1.30756e+06	3.90812e+06	2.64845e+06	2.61796e+06	3.20802e+06
Q9CVB6	2	2	67.78	Actin-related protein 2/3 complex subunit 2 OS=Mus musculus GN=Arpc2 PE=1 SV=3	Arpc2	377351	179135	377351	636028	167515	189420	285526	390248	26683	43611.5	362902	401380	1.21915e+06	1.14919e+06	1.30109e+06	1.66042e+06	746930	1.14964e+06	202966	385814	547474	608067	719519	878077
Q3ULJ0	2	2	104.68	Glycerol-3-phosphate dehydrogenase 1-like protein OS=Mus musculus GN=Gpd1l PE=1 SV=2	Gpd1l	564805	710781	564805	112884	109496	62203.9	501738	71103.1	326174	523482	111361	255702	90016.2	121486	133588	369398	41513.3	202846	288577	561059	171847	178900	332922	517489
Q9DBG5	2	2	74.77	Perilipin-3 OS=Mus musculus GN=Plin3 PE=1 SV=1	Plin3	1.20533e+06	1.46445e+06	1.20533e+06	1.72959e+06	1.68214e+06	1.85309e+06	722995	865617	1.74552e+06	2.36369e+06	390880	912166	3.03341e+06	3.67486e+06	2.37761e+06	3.39443e+06	2.0609e+06	3.07074e+06	2.4271e+06	3.37832e+06	2.70391e+06	2.19246e+06	3.88064e+06	3.90733e+06
Q91V14	2	2	67.86	Solute carrier family 12 member 5 OS=Mus musculus GN=Slc12a5 PE=1 SV=2	Slc12a5	221843	373514	221843	317922	248229	340374	0	0	0	0	0	0	0	0	0	0	0	0	0	0	0	0	0	0
Q8VD62	1	1	59.75	UPF0696 protein C11orf68 homolog OS=Mus musculus GN=Bles03 PE=1 SV=1	Bles03	89797.1	146117	89797.1	567516	151295	206431	0	0	0	0	0	0	69276.7	58638.9	61665.9	149474	31524.2	127191	544104	956226	285994	220564	1.029e+06	1.09396e+06
P47962	1	1	81.26	60S ribosomal protein L5 OS=Mus musculus GN=Rpl5 PE=1 SV=3	Rpl5	39089.3	89163.5	39089.3	344352	132231	144923	512797	660072	452011	658693	585516	767555	619601	435521	721463	1.37157e+06	306230	770286	431805	924341	1.13731e+06	1.31476e+06	2.10297e+06	1.9821e+06
Q80TA6	1	1	26.39	Myotubularin-related protein 12 OS=Mus musculus GN=Mtmr12 PE=1 SV=2	Mtmr12	89249	92582	89249	0	1409.23	0	0	0	0	0	0	0	0	0	0	0	0	0	0	0	0	0	0	0
Q9CQ48	1	1	22.59	NudC domain-containing protein 2 OS=Mus musculus GN=Nudcd2 PE=1 SV=1	Nudcd2	774.105	24658.6	774.105	0	310123	2545.17	562108	526676	513514	712753	636107	700368	158432	217178	313894	380939	107275	205930	632100	496482	370237	568279	878662	630075
Q0VE82	1	1	30.43	Copine-7 OS=Mus musculus GN=Cpne7 PE=1 SV=1	Cpne7	112284	193173	112284	43082.1	13173.7	121807	24012	8413.2	282871	524177	95588.3	18409.6	0	0	0	0	0	0	0	0	0	0	0	0
P14869	1	1	25.86	60S acidic ribosomal protein P0 OS=Mus musculus GN=Rplp0 PE=1 SV=3	Rplp0	807018	955608	807018	61690.6	52089.3	238055	624829	1.11426e+06	658203	1.17028e+06	12401.9	48726.1	974659	969936	995813	1.72967e+06	549525	996402	582465	587473	771774	1.86492e+06	1.03012e+06	1.14516e+06
Q9ER72	1	1	44	Cysteine--tRNA ligase, cytoplasmic OS=Mus musculus GN=Cars PE=1 SV=2	Cars	168286	251488	168286	12881.3	2749.39	2855.83	0	0	0	0	0	0	0	0	0	0	0	0	0	0	0	0	0	0
Q9CX00	1	1	51.34	IST1 homolog OS=Mus musculus GN=Ist1 PE=1 SV=1	Ist1	124078	332353	124078	323583	149824	355555	0	0	0	0	0	0	331437	335475	405707	437741	187728	436097	0	0	0	0	0	0
O55142	1	1	95.93	60S ribosomal protein L35a OS=Mus musculus GN=Rpl35a PE=1 SV=2	Rpl35a	130028	172331	130028	161.731	453.71	1728.93	0	0	0	0	0	0	0	0	0	0	0	0	0	0	0	0	0	0
Q64471	1	1	45.27	Glutathione S-transferase theta-1 OS=Mus musculus GN=Gstt1 PE=1 SV=4	Gstt1	75881.7	108671	75881.7	0	96.6116	11408.2	0	0	0	0	0	0	0	0	0	0	0	0	0	0	0	0	0	0
E9PV24	1	1	31.09	Fibrinogen alpha chain OS=Mus musculus GN=Fga PE=1 SV=1	Fga	78633.8	67382.4	78633.8	0	0	0	0	0	0	0	0	0	0	0	0	0	0	0	0	0	0	0	0	0
Q62108	1	1	73.7	Disks large homolog 4 OS=Mus musculus GN=Dlg4 PE=1 SV=1	Dlg4	152598	151433	152598	241689	227756	234974	447000	384806	1898.38	2388.5	77241.5	34692.9	225113	132638	477943	655747	176725	336492	277423	463513	460687	718945	300014	241965
Q99MK8	1	1	40.89	Beta-adrenergic receptor kinase 1 OS=Mus musculus GN=Grk2 PE=1 SV=2	Grk2	183983	339981	183983	684574	396239	436993	588194	385178	330800	644571	471586	479921	323579	431382	331584	687696	149774	271617	349219	939495	381135	508885	772535	844321
Q9WU28	1	1	44.25	Prefoldin subunit 5 OS=Mus musculus GN=Pfdn5 PE=1 SV=1	Pfdn5	69934.6	94495.3	69934.6	1066.32	73393.2	56020.8	4475.56	26965.4	853728	1.43276e+06	0	18276.8	0	0	0	0	0	0	851211	1.23964e+06	1.70577e+06	1.53693e+06	1.83625e+06	1.71342e+06
Q5SYD0	1	1	19.74	Unconventional myosin-Id OS=Mus musculus GN=Myo1d PE=1 SV=1	Myo1d	31.2024	0	31.2024	0	326.012	606753	219960	172732	0	0	0	0	0	0	0	0	0	0	0	0	0	0	0	0
Q9R060	1	1	36.74	Cytosolic Fe-S cluster assembly factor NUBP1 OS=Mus musculus GN=Nubp1 PE=1 SV=1	Nubp1	175253	220579	175253	221196	52842.1	113956	0	0	0	0	0	0	0	0	0	0	0	0	0	0	0	0	0	0
Q8C3W1	1	1	26.17	Uncharacterized protein C1orf198 homolog OS=Mus musculus PE=1 SV=1	1SV	193772	275929	193772	61539.6	267305	63567.4	278270	308149	438863	849052	520617	286991	165173	150576	161057	137624	199192	474009	54014.3	7697.27	4942.3	16818.8	89929.3	66639.3
Q9WUU7	1	1	57.28	Cathepsin Z OS=Mus musculus GN=Ctsz PE=1 SV=1	Ctsz	39377.9	24420.1	39377.9	2051.83	7059.87	1699.62	0	0	0	0	0	0	0	0	0	0	0	0	0	0	0	0	0	0
Q8VEL9	1	1	22.86	GTP-binding protein REM 2 OS=Mus musculus GN=Rem2 PE=1 SV=2	Rem2	39746.3	85273.6	39746.3	410702	298431	185412	789923	1.19385e+06	215967	154794	3826.64	117092	165542	113456	646380	940293	179305	197619	850197	713915	823516	696493	1.60953e+06	1.55049e+06
Q3U898	1	1	65.98	COP9 signalosome complex subunit 9 OS=Mus musculus GN=Cops9 PE=1 SV=1	Cops9	211797	300551	211797	736826	568190	769836	2.16996e+06	123592	2.50986e+06	3.42289e+06	2.90688e+06	2.8226e+06	760986	1.0004e+06	569236	887702	560914	590546	2.91238e+06	2.90558e+06	2.94038e+06	3.21131e+06	1.43555e+06	159477
Q921I1	1	1	49.93	Serotransferrin OS=Mus musculus GN=Tf PE=1 SV=1	Tf	8098.78	7988.78	8098.78	261741	155338	260396	209282	585834	46662	78288.9	201036	381270	452282	716483	301417	659255	122307	257393	554248	920427	1.35401e+06	1.39259e+06	542262	248787
O88746	1	1	41.78	Target of Myb protein 1 OS=Mus musculus GN=Tom1 PE=1 SV=1	Tom1	12764.7	14298.2	12764.7	0	3157.91	2088.11	342931	247058	213292	252861	360964	291152	132559	201069	94342.4	175494	41393.4	74995.1	58365.5	149735	166423	269539	119308	114651
P61759	1	1	24.75	Prefoldin subunit 3 OS=Mus musculus GN=Vbp1 PE=1 SV=2	Vbp1	157578	204363	157578	863576	115353	110570	420225	365671	579707	999026	751855	1.26902e+06	488410	888901	310842	711393	350072	460483	688947	1.19376e+06	676909	695774	458285	464924
P07758	1	1	32.62	Alpha-1-antitrypsin 1-1 OS=Mus musculus GN=Serpina1a PE=1 SV=4	Serpina1a	292.507	808.384	292.507	232114	34780.4	0	0	0	0	0	0	0	0	0	0	0	0	0	118735	165961	111994	87419.2	160484	192130
Q91VD9	1	1	48.6	NADH-ubiquinone oxidoreductase 75 kDa subunit, mitochondrial OS=Mus musculus GN=Ndufs1 PE=1 SV=2	Ndufs1	549427	937553	549427	230378	115478	460567	215911	240933	1.42109e+06	2.11105e+06	1.88609e+06	2.09487e+06	2.12748e+06	2.93147e+06	2.04348e+06	651879	1.55446e+06	1.71976e+06	6.83851e+06	8.17155e+06	7.48898e+06	6.42206e+06	1.01014e+07	1.10658e+07
Q8CAK1	1	1	35.06	Putative transferase CAF17 homolog, mitochondrial OS=Mus musculus GN=Iba57 PE=1 SV=1	Iba57	1.25385e+06	1.50029e+06	1.25385e+06	529416	103594	253560	0	0	0	0	0	0	0	0	0	0	0	0	837868	874266	580374	481607	567102	700687
P84084	1	1	39	ADP-ribosylation factor 5 OS=Mus musculus GN=Arf5 PE=1 SV=2	Arf5	249550	328036	249550	1.68908e+06	160907	2.18611e+06	1.71958e+06	2.68062e+06	7.27647e+06	6.89688e+06	4.38342e+06	5.3881e+06	5.21349e+06	6.01791e+06	3.34842e+06	225563	2.83783e+06	3.22886e+06	5.12763e+06	5.46801e+06	5.71858e+06	4.12774e+06	1.78597e+06	4.95387e+06
Q9Z2C9	1	1	36.21	Myotubularin-related protein 7 OS=Mus musculus GN=Mtmr7 PE=1 SV=2	Mtmr7	382967	438197	382967	862477	286451	283729	184796	155293	263494	324149	193825	223492	200954	56972.3	321382	527997	234181	547438	437430	558371	140677	412033	544078	641515
Q62425	1	1	54.24	Cytochrome c oxidase subunit NDUFA4 OS=Mus musculus GN=Ndufa4 PE=1 SV=2	Ndufa4	27991.4	61012.2	27991.4	456088	88645.2	80961.8	417731	435567	182687	280426	522138	494376	0	0	0	0	0	0	0	0	0	0	0	0
Q8BH66	1	1	32.65	Atlastin-1 OS=Mus musculus GN=Atl1 PE=1 SV=1	Atl1	208937	90978.2	208937	33.1311	198.894	12.607	0	0	0	0	0	0	0	0	0	0	0	0	0	0	0	0	0	0
P24547	1	1	34.82	Inosine-5'-monophosphate dehydrogenase 2 OS=Mus musculus GN=Impdh2 PE=1 SV=2	Impdh2	275355	309856	275355	7314.89	12574.6	11075.3	1.38029e+06	880087	989874	1.66343e+06	724271	1.34572e+06	1.05319e+06	1.03244e+06	1.40584e+06	2.84463e+06	888230	1.33466e+06	1.08946e+06	3.13026e+06	1.63459e+06	2.25335e+06	2.99982e+06	3.22099e+06
O88343	1	1	35.17	Electrogenic sodium bicarbonate cotransporter 1 OS=Mus musculus GN=Slc4a4 PE=1 SV=2	Slc4a4	178093	208009	178093	228955	213929	357518	713064	354286	11494.3	22803.9	42576.3	93668.2	561511	304194	461740	464184	81495.5	235252	402641	663550	468550	692868	1.45765e+06	1.48691e+06
Q62421	1	1	35.28	Endophilin-A3 OS=Mus musculus GN=Sh3gl3 PE=1 SV=1	Sh3gl3	23187.5	78099	23187.5	5701.6	0	281.205	656589	526176	938080	1.26063e+06	553779	595226	268278	338637	347516	414835	180943	370173	379784	820338	316188	209763	570308	730804
P62315	1	1	23.05	Small nuclear ribonucleoprotein Sm D1 OS=Mus musculus GN=Snrpd1 PE=1 SV=1	Snrpd1	355110	317953	355110	2.3962e+06	396655	178301	730635	107453	953333	1.13963e+06	624042	1.25898e+06	1.02507e+06	1.2476e+06	1.51221e+06	381402	712109	921819	711793	624251	2.31414e+06	803829	587722	2.65366e+06
Q9Z2I2	1	1	31.41	Peptidyl-prolyl cis-trans isomerase FKBP1B OS=Mus musculus GN=Fkbp1b PE=1 SV=3	Fkbp1b	191950	289138	191950	100111	124397	157834	0	0	0	0	0	0	0	0	0	0	0	0	0	0	0	0	0	0
Q9DBC0	1	1	38.31	Selenoprotein O OS=Mus musculus GN=Selo PE=1 SV=4	Selo	240425	312496	240425	10224.3	109864	62788.3	249423	365602	263672	288208	623079	615900	199855	151387	65532.4	11265.9	211559	427013	542612	488452	709207	408913	516471	462105
Q8BLE7	1	1	28.58	Vesicular glutamate transporter 2 OS=Mus musculus GN=Slc17a6 PE=1 SV=1	Slc17a6	238987	178393	238987	0	827.658	0	0	0	0	0	0	0	0	0	0	0	0	0	0	0	0	0	0	0
Q8K400	1	1	22.31	Syntaxin-binding protein 5 OS=Mus musculus GN=Stxbp5 PE=1 SV=3	Stxbp5	94828.2	110439	94828.2	273369	1.042e+06	1.16938e+06	467861	22927	120625	193664	112142	65885	0	0	0	0	0	0	203936	246543	398435	364160	1.11975e+06	877512
Q9D0S9	1	1	55.94	Histidine triad nucleotide-binding protein 2, mitochondrial OS=Mus musculus GN=Hint2 PE=1 SV=1	Hint2	1958.62	88470.6	1958.62	16279.6	701740	668494	7.14581e+06	1.02723e+07	8.75671e+06	1.14512e+07	6.96399e+06	9.48118e+06	1.61747e+06	1.40762e+06	1.78866e+06	1.61648e+06	819642	1.29656e+06	1.14577e+06	1.53887e+06	616387	928376	1.3447e+06	1.21089e+06
O88737	1	1	36.25	Protein bassoon OS=Mus musculus GN=Bsn PE=1 SV=4	Bsn	829610	1.28477e+06	829610	261158	73987.1	72018.2	155628	78698.3	1.09042e+06	1.52815e+06	268192	165679	750466	1.14836e+06	438995	309537	342397	791019	515789	74367.5	301382	353414	590235	633604
Q8K0G5	1	1	35.55	Protein TSSC1 OS=Mus musculus GN=Eipr1 PE=1 SV=2	Eipr1	152610	317445	152610	458741	325529	340946	0	0	0	0	0	0	0	0	0	0	0	0	0	0	0	0	0	0
O08917	1	1	25.82	Flotillin-1 OS=Mus musculus GN=Flot1 PE=1 SV=1	Flot1	316721	408645	316721	77873.4	429266	533313	0	0	0	0	0	0	0	0	0	0	0	0	0	0	0	0	0	0
Q8VE33	1	1	32.39	Ganglioside-induced differentiation-associated protein 1-like 1 OS=Mus musculus GN=Gdap1l1 PE=1 SV=1	Gdap1l1	258382	211371	258382	1.37324e+06	148726	95083.7	799437	792873	1.28388e+06	2.34984e+06	948468	1.2447e+06	856288	707011	836758	1.62201e+06	790185	1.19663e+06	1.62501e+06	2.2186e+06	706226	866518	1.69573e+06	1.75324e+06
Q80TM9	1	1	25.64	Nischarin OS=Mus musculus GN=Nisch PE=1 SV=2	Nisch	6620.14	0	6620.14	183121	67516.9	49544.4	387084	438075	1.4179e+06	2.44683e+06	1.05764e+06	1.42474e+06	1.10485e+06	1.46255e+06	1.56638e+06	1.75622e+06	809759	1.30292e+06	1.5428e+06	2.53586e+06	2.52357e+06	1.59925e+06	3.26826e+06	3.42695e+06
Q91WG7	1	1	40.18	Diacylglycerol kinase gamma OS=Mus musculus GN=Dgkg PE=1 SV=1	Dgkg	97065	166366	97065	640093	391465	426684	295653	42165	187484	319390	144909	213752	1.07597e+06	1.52135e+06	1.71415e+06	2.71327e+06	425408	787565	668274	1.36868e+06	1.26117e+06	1.35492e+06	3.44129e+06	4.65526e+06
Q8VCD6	1	1	71.8	Receptor expression-enhancing protein 2 OS=Mus musculus GN=Reep2 PE=1 SV=2	Reep2	281500	335063	281500	1.09954e+06	895484	1.23685e+06	4.73701e+06	437641	4.74643e+06	6.88517e+06	1.97018e+06	2.74273e+06	1.43865e+06	1.79209e+06	1.55923e+06	1.19585e+06	851940	1.08927e+06	3.35452e+06	3.74398e+06	1.02512e+07	6.57562e+06	2.9172e+06	111859
Q8BG39	1	1	18.14	Synaptic vesicle glycoprotein 2B OS=Mus musculus GN=Sv2b PE=1 SV=1	Sv2b	5627.64	6061.18	5627.64	653737	10381.9	137537	153553	120345	3060.89	5102.67	311095	49622.9	25848.8	32607.2	7143.53	17831.2	17063.7	30707.3	0	0	0	0	0	0
Q9WTP6	1	1	77.1	Adenylate kinase 2, mitochondrial OS=Mus musculus GN=Ak2 PE=1 SV=5	Ak2	60176.5	120603	60176.5	414372	82465.1	46837.8	455092	198308	475636	967275	561592	721416	224330	286430	375051	290390	222045	409626	252488	457774	527224	451977	92157	21863.5
Q99MN1	1	1	25.22	Lysine--tRNA ligase OS=Mus musculus GN=Kars PE=1 SV=1	Kars	29779.8	28703.3	29779.8	1805.35	91388.6	4218.67	0	0	0	0	0	0	0	0	0	0	0	0	0	0	0	0	0	0
Q8BVG4	1	1	17.98	Dipeptidyl peptidase 9 OS=Mus musculus GN=Dpp9 PE=1 SV=2	Dpp9	93703.7	110382	93703.7	590169	46592.7	44785.5	296576	63887.6	574544	593090	394617	569692	499058	586665	962008	89436.9	434741	431077	823014	866319	1.90628e+06	1.21256e+06	527368	51040.1
P35283	1	1	33.26	Ras-related protein Rab-12 OS=Mus musculus GN=Rab12 PE=1 SV=3	Rab12	14898.3	7951.89	14898.3	152373	58136	1898.28	0	0	0	0	0	0	0	0	0	0	0	0	0	0	0	0	0	0
Q02357	1	1	32.84	Ankyrin-1 OS=Mus musculus GN=Ank1 PE=1 SV=2	Ank1	4152.07	0	4152.07	103620	0	1660.95	0	0	0	0	0	0	46003.9	36626.5	91462.3	150976	57762.4	81428.9	0	0	0	0	0	0
Q80WC7	1	1	23.65	Arf-GAP domain and FG repeat-containing protein 2 OS=Mus musculus GN=Agfg2 PE=1 SV=1	Agfg2	358.179	1430.94	358.179	241495	0	344.429	0	0	0	0	0	0	0	0	0	0	0	0	0	0	0	0	0	0
Q60932	1	1	49.76	Voltage-dependent anion-selective channel protein 1 OS=Mus musculus GN=Vdac1 PE=1 SV=3	Vdac1	396.322	2304.92	396.322	523483	2796.85	4684.8	204244	217885	221511	410353	403026	614289	957349	784126	1.60031e+06	2.37399e+06	553328	1.30287e+06	1.70033e+06	2.32802e+06	1.36455e+06	1.37651e+06	2.81685e+06	2.89366e+06
O09164	1	1	29.32	Extracellular superoxide dismutase [Cu-Zn] OS=Mus musculus GN=Sod3 PE=1 SV=1	Sod3	21576.3	20777.6	21576.3	0	26739.8	664.481	275398	306044	0	0	50758.6	103153	0	0	0	0	0	0	0	0	0	0	0	0
Q8JZW5	1	1	26.46	SH2 domain-containing protein 5 OS=Mus musculus GN=Sh2d5 PE=1 SV=2	Sh2d5	7071.57	14533	7071.57	295413	28220.9	380552	388558	264743	358553	359838	115373	237059	610311	551463	555963	102567	204811	522960	0	0	0	0	0	0
Q99J36	1	1	85.44	THUMP domain-containing protein 1 OS=Mus musculus GN=Thumpd1 PE=1 SV=1	Thumpd1	7172.57	45473	7172.57	131528	8746.43	4202.55	278362	138806	747384	1.50558e+06	109814	142822	568392	538990	733001	1.18249e+06	453539	712631	365760	153938	106896	166098	339632	395221
D3YZP9	1	1	33.67	Coiled-coil domain-containing protein 6 OS=Mus musculus GN=Ccdc6 PE=1 SV=1	Ccdc6	1765.22	15196.8	1765.22	140864	15363.7	81801.9	0	0	0	0	0	0	146253	69678.1	167156	65967.9	165505	212381	469065	314088	178298	205729	689971	523856
P28658	1	1	36.33	Ataxin-10 OS=Mus musculus GN=Atxn10 PE=1 SV=2	Atxn10	1733.92	6108.21	1733.92	0	28690.6	7673.49	155012	1.04876e+06	884418	1.06961e+06	208339	257897	421066	580269	371024	209397	291536	365007	743642	837621	392827	229583	1.00523e+06	1.17488e+06
Q9JKR6	1	1	22.68	Hypoxia up-regulated protein 1 OS=Mus musculus GN=Hyou1 PE=1 SV=1	Hyou1	18151.4	9782.42	18151.4	148695	0	5550.13	206626	118173	585735	856845	683082	1.41588e+06	47112.9	45400.2	34202.4	83552.9	30224.2	49387.7	36023.7	39192.7	21695.5	21458.9	69122.5	41375.5
P62245	1	1	32.12	40S ribosomal protein S15a OS=Mus musculus GN=Rps15a PE=1 SV=2	Rps15a	217.807	1557.33	217.807	84182.3	32140.2	5786.55	124714	149386	717.472	2201.43	38173.7	34068	46320.7	42491.6	106063	241226	12343.2	37543.2	81288.7	97369.6	134787	140501	148644	136906
Q8BIW1	1	1	73.81	Protein prune homolog OS=Mus musculus GN=Prune PE=1 SV=1	Prune	86403.6	106997	86403.6	499847	158177	75904.8	291738	184114	231445	392017	295526	349811	212773	293316	350457	49201.8	123196	154238	424317	366146	382133	136321	407286	356663
Q8BH44	1	1	33	Coronin-2B OS=Mus musculus GN=Coro2b PE=1 SV=2	Coro2b	0	0	0	110316	66692.9	85044.2	76094.6	66593.7	0	0	64111.6	0	10233.5	12541	112086	300292	2140.02	4289.67	121841	205930	74189.5	197623	252709	177029
Q9Z0P5	1	1	42.68	Twinfilin-2 OS=Mus musculus GN=Twf2 PE=1 SV=1	Twf2	50066.4	137361	50066.4	877953	39008.8	118798	129386	76519.3	691967	826231	396276	393364	317291	507458	663209	1.01452e+06	536659	795080	488976	703722	453900	552778	1.41364e+06	1.76954e+06
P62482	1	1	26.92	Voltage-gated potassium channel subunit beta-2 OS=Mus musculus GN=Kcnab2 PE=1 SV=1	Kcnab2	4328.13	1916.29	4328.13	4208.86	134110	1180.6	596905	482810	270861	429246	368137	359545	881005	917722	599261	685045	196903	533132	1.04162e+06	1.71076e+06	2.04327e+06	1.36002e+06	2.86997e+06	3.40078e+06
Q6ZWN5	1	1	24.3	40S ribosomal protein S9 OS=Mus musculus GN=Rps9 PE=1 SV=3	Rps9	14693.2	9893.19	14693.2	190520	56056.2	77999.2	0	304.905	0	0	94476.9	0	0	0	0	0	0	0	0	0	0	0	0	0
Q9D2G2	1	1	47.72	Dihydrolipoyllysine-residue succinyltransferase component of 2-oxoglutarate dehydrogenase complex, mitochondrial OS=Mus musculus GN=Dlst PE=1 SV=1	Dlst	168116	190124	168116	234350	155427	74911.4	451610	626523	1.03985e+06	1.26518e+06	1.16778e+06	1.44533e+06	100204	199513	250574	389130	158039	293929	0	379461	499612	106711	80473.2	309660
P58044	1	1	32.63	Isopentenyl-diphosphate Delta-isomerase 1 OS=Mus musculus GN=Idi1 PE=1 SV=1	Idi1	11846.3	76433.9	11846.3	245806	21177.4	364818	197969	208949	171447	235931	229501	745287	698360	1.0926e+06	462822	120916	40845.7	162174	466715	812981	893924	870192	890303	2.0399e+06
Q91WQ3	1	1	69.31	Tyrosine--tRNA ligase, cytoplasmic OS=Mus musculus GN=Yars PE=1 SV=3	Yars	25673.8	56886.4	25673.8	405515	243368	150379	908106	761889	1.00144e+06	1.5975e+06	445441	824901	763944	744150	833011	940236	678341	1.17069e+06	380041	654061	432525	587938	1.14333e+06	1.05655e+06
Q64442	1	1	29.33	Sorbitol dehydrogenase OS=Mus musculus GN=Sord PE=1 SV=3	Sord	15079.3	28993.4	15079.3	405366	125520	273948	1.1091e+06	1.34694e+06	663080	1.06023e+06	766506	524469	500544	352357	1.0613e+06	1.44309e+06	374008	564184	1.28302e+06	1.54885e+06	842487	1.24181e+06	1.52034e+06	1.2545e+06
Q8BX70	1	1	33.07	Vacuolar protein sorting-associated protein 13C OS=Mus musculus GN=Vps13c PE=1 SV=2	Vps13c	36933.9	17658.4	36933.9	104468	123151	115375	401143	554406	219253	347885	37805.3	98155.9	67707.6	52470.4	124700	240001	74895.9	151186	236216	211686	306615	305648	276433	359637
P99028	1	1	37.81	Cytochrome b-c1 complex subunit 6, mitochondrial OS=Mus musculus GN=Uqcrh PE=1 SV=2	Uqcrh	6997.51	40041.1	6997.51	625408	72072.3	177829	42004.9	21805.4	164131	254868	462446	504964	785379	1.02067e+06	178803	316673	338980	502772	2.77716e+06	4.85992e+06	3.85024e+06	2.62181e+06	1.7208e+06	1.19655e+06
Q9CQ69	1	1	51.42	Cytochrome b-c1 complex subunit 8 OS=Mus musculus GN=Uqcrq PE=1 SV=3	Uqcrq	50075.3	151308	50075.3	497346	214432	290795	18194.5	21880.5	82942.6	100057	302379	196752	196930	92598.6	96371.9	273522	105335	189603	482129	538649	238901	398563	51419.9	23165.5
P49962	1	1	59.34	Signal recognition particle 9 kDa protein OS=Mus musculus GN=Srp9 PE=1 SV=2	Srp9	75609.1	137773	75609.1	298465	81399.9	95105.9	110071	50470.3	444351	595414	25459.3	23735	244781	100859	30762.2	31560.2	138365	185717	189120	350097	111227	34688.5	90491.5	14679.7
Q91YI0	1	1	27.7	Argininosuccinate lyase OS=Mus musculus GN=Asl PE=1 SV=1	Asl	22505.6	22604.5	22505.6	311762	177361	136898	0	0	0	0	0	0	92351.3	54490.1	75170.9	52924.9	154312	241062	0	0	0	0	0	0
O08756	1	1	48.53	3-hydroxyacyl-CoA dehydrogenase type-2 OS=Mus musculus GN=Hsd17b10 PE=1 SV=4	Hsd17b10	32348.5	28678.3	32348.5	447572	128160	417348	406678	790849	853911	830469	755627	1.17771e+06	1.72234e+06	1.71113e+06	2.39068e+06	146886	1.22042e+06	1.38503e+06	2.37093e+06	2.19872e+06	2.76721e+06	3.43447e+06	1.65009e+06	2.94252e+06
Q6NS52	1	1	35.03	Diacylglycerol kinase beta OS=Mus musculus GN=Dgkb PE=1 SV=2	Dgkb	0	0	0	62130.5	139850	29786.4	303992	3943.49	0	0	0	0	1.97924e+06	2.19919e+06	1.25881e+06	650792	1.68272e+06	2.72144e+06	2.3029e+06	2.59067e+06	3.088e+06	2.0532e+06	4.60155e+06	3.52145e+06
Q62348	1	1	58.53	Translin OS=Mus musculus GN=Tsn PE=1 SV=1	Tsn	11721	15759.8	11721	127476	61487.9	78633.2	2.07183e+06	1.53639e+06	953945	1.50887e+06	1.0408e+06	1.10662e+06	142129	212348	259245	598880	89151.7	181797	110281	238133	81056.7	164926	262979	294194
Q9DC61	1	1	27.04	Mitochondrial-processing peptidase subunit alpha OS=Mus musculus GN=Pmpca PE=1 SV=1	Pmpca	23.2355	630.967	23.2355	0	213980	154648	286359	290336	385584	689470	246656	434860	167171	209539	303513	264072	105954	148335	790557	1.05562e+06	294216	254290	948804	1.03144e+06
Q9DB05	1	1	27.8	Alpha-soluble NSF attachment protein OS=Mus musculus GN=Napa PE=1 SV=1	Napa	3746.74	6920.78	3746.74	284151	11075.5	18712.1	251034	266431	206971	247347	297423	380389	331004	168880	154031	233503	361805	612070	331324	375417	250981	350341	161803	234570
Q8R1S4	1	1	24.44	Metastasis suppressor protein 1 OS=Mus musculus GN=Mtss1 PE=1 SV=1	Mtss1	6418.93	16869.9	6418.93	392511	810.844	9455.86	0	0	0	0	0	0	0	0	0	0	0	0	0	0	0	0	0	0
Q61704	1	1	33.78	Inter-alpha-trypsin inhibitor heavy chain H3 OS=Mus musculus GN=Itih3 PE=1 SV=3	Itih3	144980	183902	144980	12424.9	2976.12	8354.68	0	0	0	0	0	0	227131	147207	371288	61217.2	135856	297052	0	0	0	0	0	0
P45377	1	1	36.03	Aldose reductase-related protein 2 OS=Mus musculus GN=Akr1b8 PE=1 SV=2	Akr1b8	18714.4	12727	18714.4	155755	71209.9	58484.2	169095	157807	224719	413820	182152	393122	135573	219409	217329	250474	92042	203068	30008.3	701247	426028	329410	1.17838e+06	1.11811e+06
P38060	1	1	52.94	Hydroxymethylglutaryl-CoA lyase, mitochondrial OS=Mus musculus GN=Hmgcl PE=1 SV=2	Hmgcl	242567	176832	242567	903507	208027	121052	412561	102653	322982	479838	475405	866538	371477	705304	482311	534279	300179	451289	803696	1.08915e+06	649999	892988	730980	542306
Q91V64	1	1	41.36	Isochorismatase domain-containing protein 1 OS=Mus musculus GN=Isoc1 PE=1 SV=1	Isoc1	67465	70152	67465	502704	5283.69	2421.64	754745	761510	309002	464120	310049	484776	434945	452267	486627	469841	234884	347661	599281	1.03071e+06	1.19889e+06	1.28775e+06	1.2441e+06	2.21587e+06
Q9D1Q6	1	1	39.07	Endoplasmic reticulum resident protein 44 OS=Mus musculus GN=Erp44 PE=1 SV=1	Erp44	71953.9	63472.7	71953.9	777962	168823	27612.2	735122	947250	582597	997699	1.50143e+06	1.25674e+06	413267	932251	826023	1.65517e+06	503782	922086	194350	1.29469e+06	292371	597883	1.51925e+06	1.56645e+06
Q91WK2	1	1	38.77	Eukaryotic translation initiation factor 3 subunit H OS=Mus musculus GN=Eif3h PE=1 SV=1	Eif3h	6030.39	21132.5	6030.39	0	355183	402819	0	0	0	0	0	0	562069	517174	477756	417117	187534	339755	472375	952167	159175	142240	1.25373e+06	690963
Q99MN9	1	1	78.27	Propionyl-CoA carboxylase beta chain, mitochondrial OS=Mus musculus GN=Pccb PE=1 SV=2	Pccb	173139	370084	173139	326747	262463	392843	376056	278743	67114.8	104912	283770	279083	271020	332007	311876	512917	201888	479650	325374	668458	409629	518391	647515	728451
P11352	1	1	41	Glutathione peroxidase 1 OS=Mus musculus GN=Gpx1 PE=1 SV=2	Gpx1	985466	1.1454e+06	985466	125916	112518	1.41698e+06	1.68793e+06	1.44516e+06	273038	380019	4.58274e+06	5.25627e+06	1.23916e+06	1.43949e+06	1.36681e+06	803866	1.51186e+06	2.07846e+06	1.78351e+06	2.36359e+06	1.15877e+06	1.26274e+06	2.05019e+06	2.17108e+06
P68040	1	1	36.26	Receptor of activated protein C kinase 1 OS=Mus musculus GN=Rack1 PE=1 SV=3	Rack1	338635	432635	338635	24780.6	59261.5	3683.78	59420.6	22820.8	26828.4	63428	131114	43549.6	0	0	0	0	0	0	388089	733134	243144	92948.5	1.02578e+06	856767
A2AHC3	1	1	27.22	Calmodulin-regulated spectrin-associated protein 1 OS=Mus musculus GN=Camsap1 PE=1 SV=1	Camsap1	316611	493624	316611	507280	217517	234043	0	0	0	0	0	0	0	0	0	0	0	0	0	0	0	0	0	0
P19536	1	1	28.27	Cytochrome c oxidase subunit 5B, mitochondrial OS=Mus musculus GN=Cox5b PE=1 SV=1	Cox5b	1.33335e+06	2.12672e+06	1.33335e+06	455029	2.26941e+06	1.63056e+06	50332.4	37583.3	542211	656304	2.39727e+06	1.57044e+06	0	0	0	0	0	0	0	0	0	0	0	0
Q06185	1	1	38.08	ATP synthase subunit e, mitochondrial OS=Mus musculus GN=Atp5i PE=1 SV=2	Atp5i	212609	318680	212609	1.53554e+06	726062	653741	1.5911e+06	1.0934e+06	469217	772192	1.17102e+06	1.42249e+06	519453	466902	579357	1.10856e+06	294472	709134	869590	1.90717e+06	928845	1.14505e+06	2.25472e+06	2.651e+06
Q8JZN5	1	1	68.95	Acyl-CoA dehydrogenase family member 9, mitochondrial OS=Mus musculus GN=Acad9 PE=1 SV=2	Acad9	1.25431e+06	1.62165e+06	1.25431e+06	1.40745e+06	483821	939131	0	0	0	0	0	0	352607	610946	404479	532696	405601	647429	0	0	0	0	0	0
Q8R146	1	1	55.16	Acylamino-acid-releasing enzyme OS=Mus musculus GN=Apeh PE=1 SV=3	Apeh	1.34428e+06	1.85952e+06	1.34428e+06	2.16746e+06	1.13799e+06	1.21379e+06	125028	92195.3	469860	810517	881918	810740	707304	1.10065e+06	529936	960916	563075	1.17159e+06	809344	1.65706e+06	881984	1.02959e+06	1.00487e+06	1.53619e+06
Q8VE62	1	1	59.97	Polyadenylate-binding protein-interacting protein 1 OS=Mus musculus GN=Paip1 PE=1 SV=1	Paip1	322499	338399	322499	807667	207330	187636	3.10637e+06	3.02481e+06	2.64597e+06	4.27904e+06	2.10734e+06	2.35402e+06	346539	282489	897110	1.70155e+06	528221	812294	1.57835e+06	2.21822e+06	683210	1.41541e+06	1.53562e+06	1.78369e+06
Q62433	1	1	30.46	Protein NDRG1 OS=Mus musculus GN=Ndrg1 PE=1 SV=1	Ndrg1	1.07152e+06	1.26269e+06	1.07152e+06	2.22544e+06	789369	1.04527e+06	682027	713336	54957.8	73155.5	999212	795335	288064	230059	22811.2	10833	337949	298123	0	0	0	0	0	0
Q9EPL2	1	1	106.12	Calsyntenin-1 OS=Mus musculus GN=Clstn1 PE=1 SV=1	Clstn1	2.89724e+06	3.9707e+06	2.89724e+06	3.05538e+06	1.1684e+06	1.83072e+06	628943	280354	1.74714e+06	2.22693e+06	1.00666e+06	988671	502035	397684	438891	275400	688413	1.05335e+06	0	0	0	0	0	0
Q9D7S9	1	1	36.25	Charged multivesicular body protein 5 OS=Mus musculus GN=Chmp5 PE=1 SV=1	Chmp5	155790	182487	155790	433764	284511	190219	0	0	0	0	0	0	171543	339896	157132	45739.6	256232	501958	1.8843e+06	745666	256805	275247	80971.1	129260
Q9D2G5	1	1	25.96	Synaptojanin-2 OS=Mus musculus GN=Synj2 PE=1 SV=2	Synj2	66414	547413	66414	1.47179e+06	493606	590784	2.44073e+06	3.79246e+06	157957	283581	3.03984e+06	5.46437e+06	2.10922e+06	1.36204e+06	421695	1.35699e+06	1.4134e+06	2.36403e+06	3.56176e+06	6.54051e+06	3.13434e+06	4.38002e+06	3.26073e+06	5.90783e+06
Q8VE88	1	1	146.12	Protein FAM114A2 OS=Mus musculus GN=Fam114a2 PE=1 SV=2	Fam114a2	109469	207520	109469	451188	151359	187601	277344	119420	481819	740284	326365	249595	754969	671279	875919	1.14329e+06	514025	622630	820611	944137	962225	729573	2.42791e+06	2.50681e+06
Q9ES97	1	1	121.39	Reticulon-3 OS=Mus musculus GN=Rtn3 PE=1 SV=2	Rtn3	318791	351141	318791	292251	209541	28757.6	919042	524986	1.54077e+06	2.62198e+06	467900	617204	895202	780503	1.0122e+06	1.49258e+06	1.11495e+06	1.5965e+06	735246	729123	179899	290869	1.40715e+06	1.48888e+06
P14094	1	1	31.82	Sodium/potassium-transporting ATPase subunit beta-1 OS=Mus musculus GN=Atp1b1 PE=1 SV=1	Atp1b1	15328.5	644.872	15328.5	2.80392e+06	67252.4	200116	5617.98	11588.6	2.3669e+06	4.15197e+06	549506	7734.22	1.63458e+06	1.28928e+06	1.85737e+06	2.86236e+06	1.87298e+06	3.51599e+06	2.76865e+06	3.60325e+06	1.62481e+06	1.67801e+06	3.41049e+06	3.52126e+06
Q61301	1	1	41.6	Catenin alpha-2 OS=Mus musculus GN=Ctnna2 PE=1 SV=3	Ctnna2	551666	710049	551666	824815	1.13732e+06	1.56132e+06	84751.5	36560.9	1.47035e+06	2.12614e+06	28191.2	522066	1.52978e+06	1.39532e+06	1.13257e+06	886154	872520	1.17061e+06	0	0	0	0	0	0
Q99J99	1	1	150.57	3-mercaptopyruvate sulfurtransferase OS=Mus musculus GN=Mpst PE=1 SV=3	Mpst	200905	259153	200905	257144	311720	396737	187906	1989.3	355141	543325	145823	212575	897512	1.47182e+06	1.60268e+06	2.29248e+06	412593	847100	1.08174e+06	1.98564e+06	1.92395e+06	1.55201e+06	3.60882e+06	4.17236e+06
Q9CQW1	1	1	81	Synaptobrevin homolog YKT6 OS=Mus musculus GN=Ykt6 PE=1 SV=1	Ykt6	130509	379736	130509	2.05102e+06	380353	318220	434646	778659	34246.8	35895.2	413429	510473	650144	604280	788926	912507	656068	1.82484e+06	968693	1.07263e+06	807873	818400	852208	896716
P14231	1	1	35.34	Sodium/potassium-transporting ATPase subunit beta-2 OS=Mus musculus GN=Atp1b2 PE=1 SV=2	Atp1b2	34879.5	57158.6	34879.5	996445	193270	211244	1.03733e+06	947445	487.262	2454.76	1.2585e+06	1.40774e+06	367811	266787	753997	1.1146e+06	365189	935743	396264	849389	276444	313031	1.02872e+06	1.17297e+06
Q9CQR6	1	1	59.04	Serine/threonine-protein phosphatase 6 catalytic subunit OS=Mus musculus GN=Ppp6c PE=1 SV=1	Ppp6c	182923	294631	182923	271676	199389	367830	378738	12269.5	118324	198294	185166	215107	1.23619e+06	1.51586e+06	1.43118e+06	3.49576e+06	725448	1.03941e+06	352875	713007	105564	253148	997470	1.06594e+06
Q91YT0	1	1	38.81	NADH dehydrogenase [ubiquinone] flavoprotein 1, mitochondrial OS=Mus musculus GN=Ndufv1 PE=1 SV=1	Ndufv1	358002	476437	358002	1099.57	43673.1	6444.06	803840	962278	1.56454e+06	2.12507e+06	3.20578e+06	3.40061e+06	991402	1.14098e+06	1.06135e+06	832245	1.49412e+06	1.74371e+06	2.71155e+06	2.46737e+06	3.39414e+06	1.62203e+06	1.50791e+06	1.61836e+06
B9EJA2	1	1	80.1	Cortactin-binding protein 2 OS=Mus musculus GN=Cttnbp2 PE=1 SV=2	Cttnbp2	582376	685339	582376	838268	517205	536489	0	0	0	0	0	0	0	0	0	0	0	0	0	0	0	0	0	0
Q8VCI5	1	1	43.4	Peroxisomal biogenesis factor 19 OS=Mus musculus GN=Pex19 PE=1 SV=1	Pex19	1.00308e+06	1.19199e+06	1.00308e+06	1.51541e+06	1.4058e+06	2.16374e+06	0	0	0	0	0	0	0	0	0	0	0	0	2.85957e+06	3.84205e+06	2.42429e+06	1.5517e+06	3.19655e+06	2.93096e+06
P52503	1	1	45.89	NADH dehydrogenase [ubiquinone] iron-sulfur protein 6, mitochondrial OS=Mus musculus GN=Ndufs6 PE=1 SV=2	Ndufs6	780304	611577	780304	3978.13	23229.3	39651.8	0	0	0	0	0	0	0	0	0	0	0	0	0	0	0	0	0	0
O70492	1	1	42.74	Sorting nexin-3 OS=Mus musculus GN=Snx3 PE=1 SV=3	Snx3	167088	279930	167088	509981	201833	304541	492133	609030	0	0	333634	368418	70962.9	45177.7	39792.5	126399	97763.7	154707	60042.4	146870	224803	236369	36418	94563.9
P61971	1	1	34.36	Nuclear transport factor 2 OS=Mus musculus GN=Nutf2 PE=1 SV=1	Nutf2	398930	529467	398930	254639	391306	498330	597261	316974	291698	626018	375201	448579	1.99471e+06	1.44303e+06	2.28763e+06	4.10521e+06	581709	1.75856e+06	0	0	0	0	0	0
Q6PAR5	1	1	76.5	GTPase-activating protein and VPS9 domain-containing protein 1 OS=Mus musculus GN=Gapvd1 PE=1 SV=2	Gapvd1	400945	517748	400945	725886	364566	513379	510509	190984	414445	455992	466716	541041	279368	315810	390115	403779	149223	299204	557623	807402	326203	391698	1.3009e+06	1.34921e+06
Q6P8X1	1	1	94.1	Sorting nexin-6 OS=Mus musculus GN=Snx6 PE=1 SV=2	Snx6	604048	658732	604048	835204	1.24225e+06	1.55152e+06	485884	411413	839952	1.09015e+06	199906	243165	1.0796e+06	944897	1.42069e+06	2.19072e+06	697312	1.15726e+06	1.58514e+06	1.90682e+06	1.39278e+06	1.25738e+06	3.25165e+06	3.6616e+06
Q6PDY2	1	1	24.77	2-aminoethanethiol dioxygenase OS=Mus musculus GN=Ado PE=1 SV=2	Ado	297551	412873	297551	0	20956	11366.5	0	0	0	0	0	0	944216	1.4253e+06	1.49407e+06	2.29781e+06	423490	946383	0	0	0	0	0	0
O35405	1	1	57.3	Phospholipase D3 OS=Mus musculus GN=Pld3 PE=1 SV=1	Pld3	2.11999e+06	2.8198e+06	2.11999e+06	1.61583e+06	3.44882e+06	3.21838e+06	1.82067e+06	1.72121e+06	3.67137e+06	4.88263e+06	1.69584e+06	2.3673e+06	763333	1.17672e+06	750294	1.60105e+06	714522	1.21302e+06	2.85948e+06	4.86412e+06	3.35948e+06	3.2748e+06	4.42702e+06	7.20084e+06
Q9D0R8	1	1	76.8	Protein LSM12 homolog OS=Mus musculus GN=Lsm12 PE=1 SV=1	Lsm12	807257	1.20858e+06	807257	1.00032e+06	472566	655763	887624	695207	295993	406521	882810	939902	186888	216872	170448	92266.6	27574.5	182897	0	0	0	0	0	0
Q9WUA6	1	1	45.45	RAC-gamma serine/threonine-protein kinase OS=Mus musculus GN=Akt3 PE=1 SV=1	Akt3	331234	458331	331234	419912	435772	489781	33018.5	155964	439618	858257	468237	708076	113147	67484.1	20686.2	8820.8	259008	243903	406226	577107	255373	413459	482511	549441
P56873	1	1	28.44	Sjoegren syndrome/scleroderma autoantigen 1 homolog OS=Mus musculus GN=Sssca1 PE=1 SV=1	Sssca1	585491	521649	585491	402679	349778	245971	0	0	0	0	0	0	262414	223366	297914	502384	210861	438116	0	0	0	0	0	0
Q8VEE0	1	1	55.91	Ribulose-phosphate 3-epimerase OS=Mus musculus GN=Rpe PE=1 SV=1	Rpe	879752	996642	879752	1.37585e+06	614643	846332	1.05025e+06	2.18476e+06	3.1165e+06	3.81044e+06	1.99921e+06	3.3384e+06	2.72596e+06	3.10894e+06	1.73094e+06	1.60966e+06	1.63308e+06	2.46524e+06	3.62634e+06	4.10237e+06	4.11243e+06	3.33714e+06	6.74911e+06	9.65965e+06
Q9ERT9	1	1	47.95	Protein phosphatase 1 regulatory subunit 1A OS=Mus musculus GN=Ppp1r1a PE=1 SV=1	Ppp1r1a	519789	830223	519789	473619	483241	966227	597865	568466	1.92672e+06	2.60657e+06	1.06174e+06	1.05454e+06	1.20349e+06	1.1583e+06	1.20549e+06	783933	1.35772e+06	1.4309e+06	777885	1.43915e+06	348982	384970	1.00164e+06	676640
Q6ZWV7	1	1	92.9	60S ribosomal protein L35 OS=Mus musculus GN=Rpl35 PE=1 SV=1	Rpl35	209806	281889	209806	1.7442e+06	683524	340623	456326	715237	4841.02	4620.95	298517	279600	451097	508733	173865	378120	387529	380297	390479	434382	1.27008e+06	1.19779e+06	393850	669091
Q8BWR2	1	1	33.35	PITH domain-containing protein 1 OS=Mus musculus GN=Pithd1 PE=1 SV=1	Pithd1	673554	739842	673554	1.27875e+06	398261	645317	669057	925707	2.04678e+06	3.52896e+06	832051	1.17924e+06	923886	773498	712545	1.2134e+06	978796	1.27952e+06	1.49433e+06	1.66295e+06	1.17613e+06	1.54271e+06	1.86527e+06	2.20636e+06
P45952	1	1	89.27	Medium-chain specific acyl-CoA dehydrogenase, mitochondrial OS=Mus musculus GN=Acadm PE=1 SV=1	Acadm	821492	878975	821492	1.01468e+06	628101	855071	144227	744730	399287	587370	187423	409480	328342	488271	331832	609026	293803	448286	391285	651219	684315	498877	634543	669226
Q8CGU1	1	1	30.9	Calcium-binding and coiled-coil domain-containing protein 1 OS=Mus musculus GN=Calcoco1 PE=1 SV=2	Calcoco1	581103	795236	581103	1.54942e+06	628704	656797	0	0	0	0	0	0	212564	393281	321290	478305	339402	510388	635593	505505	755775	561226	483417	710041
Q9Z1Q9	1	1	110.25	Valine--tRNA ligase OS=Mus musculus GN=Vars PE=1 SV=1	Vars	633496	829374	633496	2376.62	143501	77482.4	236534	353017	222514	270390	235117	220977	169745	93753	39975.4	43053.1	126325	313214	357895	420283	315747	312142	472875	593539
Q9JK81	1	1	31.72	UPF0160 protein MYG1, mitochondrial OS=Mus musculus GN=Myg1 PE=1 SV=1	Myg1	1.0923e+06	1.33218e+06	1.0923e+06	1.06091e+06	960646	821429	816508	915768	535005	907831	615284	759593	74320.6	74228.1	2038.76	134197	61429	146945	0	0	0	0	0	0
Q9DAW9	1	1	57.72	Calponin-3 OS=Mus musculus GN=Cnn3 PE=1 SV=1	Cnn3	7.04248	0	7.04248	463652	377168	312782	413968	50323.5	11538	16480.6	131422	115392	295518	314962	343274	571681	145354	277064	666475	593596	635816	707101	697659	1.06903e+06
P67871	1	1	38.29	Casein kinase II subunit beta OS=Mus musculus GN=Csnk2b PE=1 SV=1	Csnk2b	332668	456725	332668	0	0	139.234	707852	585858	1.50924e+06	1.77675e+06	1.51764e+06	1.45858e+06	766963	959944	1.0756e+06	1.16753e+06	717478	848765	1.11217e+06	1.54271e+06	556503	502989	1.28122e+06	910544
Q9DBL1	1	1	40.51	Short/branched chain specific acyl-CoA dehydrogenase, mitochondrial OS=Mus musculus GN=Acadsb PE=1 SV=1	Acadsb	336757	455391	336757	1.09376e+06	190176	619943	0	0	0	0	0	0	196563	323398	293702	364516	266170	367815	484597	761859	1.32897e+06	1.32691e+06	383102	23304.7
Q66JS6	1	1	36.19	Eukaryotic translation initiation factor 3 subunit J-B OS=Mus musculus GN=Eif3j2 PE=1 SV=1	Eif3j2	296058	295530	296058	770077	346920	390834	462318	490310	45198.8	73189.5	398011	346857	25611.3	10181.1	406.261	319962	3720.36	8388.25	279640	538407	603959	632464	170273	266912
Q9R062	1	1	37.64	Glycogenin-1 OS=Mus musculus GN=Gyg1 PE=1 SV=3	Gyg1	1.11546e+06	1.1218e+06	1.11546e+06	291414	542241	293832	0	0	0	0	0	0	620794	1.21672e+06	810174	533154	493140	782099	0	0	0	0	0	0
P08553	1	1	55.11	Neurofilament medium polypeptide OS=Mus musculus GN=Nefm PE=1 SV=4	Nefm	174251	210839	174251	1.2268e+06	893516	1.5927e+06	449180	696372	988341	1.85468e+06	248837	230635	1.77696e+06	2.43503e+06	1.04989e+06	600920	691873	1.44224e+06	1.20589e+06	2.04052e+06	3.06722e+06	1.92899e+06	3.19585e+06	3.7817e+06
Q3UH60	1	1	50.62	Disco-interacting protein 2 homolog B OS=Mus musculus GN=Dip2b PE=1 SV=1	Dip2b	56667.4	79663	56667.4	287481	9050.81	12350	1.72876	0	0	0	218138	0	486241	533419	618084	650330	372796	551496	210923	207848	224384	192342	499012	518475
P37804	1	1	29.95	Transgelin OS=Mus musculus GN=Tagln PE=1 SV=3	Tagln	96209.1	113257	96209.1	436810	456321	394297	110691	122498	978278	1.86004e+06	386561	416246	353922	409271	338523	589876	312935	459154	42750.5	495009	33369.7	71554.1	496908	447100
Q99PJ0	1	1	42.83	Neurotrimin OS=Mus musculus GN=Ntm PE=1 SV=2	Ntm	156234	218005	156234	150787	89196.4	80198.2	883486	1.0065e+06	387240	636873	798862	457347	310093	307823	565410	915056	402651	676532	79557.8	524615	771933	620530	105631	129926
Q91YQ5	1	1	56.77	Dolichyl-diphosphooligosaccharide--protein glycosyltransferase subunit 1 OS=Mus musculus GN=Rpn1 PE=1 SV=1	Rpn1	234163	311295	234163	609610	398371	401332	1.06568e+06	826536	515957	886102	341411	343004	360438	189590	492234	1.32339e+06	222482	369304	684216	872692	518105	914453	526903	688948
Q9EQ80	1	1	53.52	NIF3-like protein 1 OS=Mus musculus GN=Nif3l1 PE=1 SV=4	Nif3l1	193389	208385	193389	650498	304269	252594	177361	104717	243746	314930	71236.6	104595	389338	241629	481418	918469	256046	426850	511929	1.07273e+06	349680	561591	882015	1.10059e+06
P35278	1	1	43.54	Ras-related protein Rab-5C OS=Mus musculus GN=Rab5c PE=1 SV=2	Rab5c	6890.99	11380.3	6890.99	638800	229017	828.313	587164	1.00329e+06	523653	630589	651410	885711	733870	442680	760144	806453	450876	916493	1.27491e+06	1.7938e+06	1.01974e+06	1.04202e+06	1.82024e+06	1.87098e+06
P26039	1	1	26.92	Talin-1 OS=Mus musculus GN=Tln1 PE=1 SV=2	Tln1	246243	292239	246243	473306	289352	307631	162428	82037.9	588632	727534	263556	508342	441780	449022	486820	774163	451040	580412	754108	945516	822730	473654	1.00348e+06	1.00494e+06
P60202	1	1	59.51	Myelin proteolipid protein OS=Mus musculus GN=Plp1 PE=1 SV=2	Plp1	321341	413150	321341	70790.7	298440	180934	0	0	0	0	0	0	0	0	0	0	0	0	0	0	0	0	0	0
Q05D44	1	1	31.31	Eukaryotic translation initiation factor 5B OS=Mus musculus GN=Eif5b PE=1 SV=2	Eif5b	271888	462125	271888	638690	60501.3	316987	0	0	0	0	0	0	162629	127687	92278.6	12808.2	74247.7	185700	293451	317215	450642	463973	178741	231076
P12849	1	1	74.23	cAMP-dependent protein kinase type I-beta regulatory subunit OS=Mus musculus GN=Prkar1b PE=1 SV=2	Prkar1b	79189	106523	79189	203526	132532	91252.3	0	0	0	0	0	0	145581	157241	74116.6	68335	174000	192723	136378	156010	197363	143208	146138	169261
Q6PGF7	1	1	88.03	Exocyst complex component 8 OS=Mus musculus GN=Exoc8 PE=1 SV=1	Exoc8	132950	180459	132950	22536.2	129772	97928.7	0	0	0	0	0	0	0	0	0	0	0	0	0	0	0	0	0	0
Q8C437	1	1	38.89	PEX5-related protein OS=Mus musculus GN=Pex5l PE=1 SV=2	Pex5l	209344	212474	209344	1694.78	417.098	26106	118549	188096	406599	670519	624101	234766	251201	188152	276911	92890.1	111778	187192	747708	632185	446664	453802	280386	139036
Q62523	1	1	43.93	Zyxin OS=Mus musculus GN=Zyx PE=1 SV=2	Zyx	193146	267050	193146	1986.66	28302.8	10752.3	0	0	0	0	0	0	0	0	0	0	0	0	0	0	0	0	0	0
Q60759	1	1	35.66	Glutaryl-CoA dehydrogenase, mitochondrial OS=Mus musculus GN=Gcdh PE=1 SV=2	Gcdh	123144	198882	123144	365236	1.00595e+06	766957	26556	13893.2	25622.7	10058.3	82221.3	84948	269769	471960	401740	713043	165746	383624	769469	1.54149e+06	304049	438697	836469	993325
Q8VCC9	1	1	25.87	Spondin-1 OS=Mus musculus GN=Spon1 PE=1 SV=1	Spon1	384361	554207	384361	171717	311837	308791	0	0	0	0	0	0	181060	406350	134166	269165	251699	341804	0	0	0	0	0	0
Q3TDD9	1	1	61.87	Protein phosphatase 1 regulatory subunit 21 OS=Mus musculus GN=Ppp1r21 PE=1 SV=2	Ppp1r21	269447	377366	269447	746955	722095	578189	936078	901642	849268	1.34011e+06	599775	942370	710505	972999	1.2877e+06	2.23792e+06	532287	1.08545e+06	788143	1.47164e+06	846881	1.32296e+06	1.48617e+06	1.663e+06
P99027	1	1	59.34	60S acidic ribosomal protein P2 OS=Mus musculus GN=Rplp2 PE=1 SV=3	Rplp2	780044	953135	780044	3.67375e+06	1.98907e+06	2.93679e+06	4.20035e+06	4.60504e+06	4.99404e+06	6.96347e+06	4.86816e+06	4.67171e+06	5.06115e+06	5.72259e+06	3.83246e+06	6.75519e+06	3.28472e+06	4.65166e+06	6.81507e+06	8.99024e+06	1.03904e+07	5.76015e+06	1.37752e+07	1.79522e+07
Q8K1J6	1	1	38.38	CCA tRNA nucleotidyltransferase 1, mitochondrial OS=Mus musculus GN=Trnt1 PE=1 SV=1	Trnt1	16180.8	16569.2	16180.8	471119	211220	235092	634688	595282	529430	1.10383e+06	258611	387991	224337	160115	650339	1.37472e+06	231158	428152	740191	1.11633e+06	332151	701866	714637	885701
P22005	1	1	59.08	Proenkephalin-A OS=Mus musculus GN=Penk PE=1 SV=2	Penk	170446	248987	170446	131657	17393.4	214182	44758.6	62733.8	169741	252236	133987	223588	359794	681257	598193	446177	637673	999721	1.84692e+06	1.63549e+06	1.95425e+06	1.73906e+06	317105	7823.36
O54774	1	1	102.99	AP-3 complex subunit delta-1 OS=Mus musculus GN=Ap3d1 PE=1 SV=1	Ap3d1	258922	318838	258922	751845	933902	1.15369e+06	2.76872e+06	420261	3.72626e+06	5.16989e+06	1.99715e+06	2.28177e+06	2.02091e+06	3.71684e+06	1.62256e+06	4.03798e+06	1.37762e+06	2.08798e+06	1.71268e+06	2.15579e+06	3.2993e+06	3.30153e+06	1.42525e+06	1.13193e+06
Q3TES0	1	1	33.26	IQ motif and SEC7 domain-containing protein 3 OS=Mus musculus GN=Iqsec3 PE=1 SV=1	Iqsec3	165480	230969	165480	379547	367665	327938	143925	477712	458400	891906	163857	202141	605424	464337	682873	1.29636e+06	347814	564830	334597	511198	393670	495518	523201	652208
Q9WTQ5	1	1	100.49	A-kinase anchor protein 12 OS=Mus musculus GN=Akap12 PE=1 SV=1	Akap12	156288	93633.8	156288	706563	616926	429659	128106	124251	4633.47	37035.8	113833	210706	670343	689463	706768	1.6482e+06	313262	636855	219444	549811	216818	214549	414897	506396
Q3UNH4	1	1	62.65	G protein-regulated inducer of neurite outgrowth 1 OS=Mus musculus GN=Gprin1 PE=1 SV=2	Gprin1	250005	233045	250005	21209.5	161394	249918	27698.4	15915.4	297318	520136	6118.13	82205.8	0	0	0	0	0	0	581372	495401	201980	201097	7750.26	35543
P61961	1	1	20.1	Ubiquitin-fold modifier 1 OS=Mus musculus GN=Ufm1 PE=1 SV=1	Ufm1	1.4799e+06	1.46687e+06	1.4799e+06	4.30027e+06	372644	1.17655e+06	567622	854479	2.63024e+06	4.53565e+06	2.84509e+06	2.75613e+06	1.12369e+06	1.32801e+06	1.87435e+06	216005	3.16033e+06	3.67352e+06	0	0	0	0	0	0
Q9D1L0	1	1	46.07	Coiled-coil-helix-coiled-coil-helix domain-containing protein 2 OS=Mus musculus GN=Chchd2 PE=2 SV=1	Chchd2	291665	539662	291665	1.35672e+06	287733	326203	325179	74022.3	57407.5	46101.4	386156	286444	13340.3	15323.4	35251.1	3303.99	379470	38333.3	0	0	0	0	0	0
Q8BTM8	1	1	23.39	Filamin-A OS=Mus musculus GN=Flna PE=1 SV=5	Flna	427105	355858	427105	904348	231381	306027	0	0	0	0	0	0	176174	157333	148978	273162	215896	483841	229493	402024	145379	160606	572980	443095
Q60902	1	1	39.37	Epidermal growth factor receptor substrate 15-like 1 OS=Mus musculus GN=Eps15l1 PE=1 SV=3	Eps15l1	68739	150944	68739	101010	190847	174974	113916	279743	0	0	118620	123173	629581	719687	1.10161e+06	988755	416255	473307	97275.1	237174	178672	151525	247572	318882
Q9R1L5	1	1	28.7	Microtubule-associated serine/threonine-protein kinase 1 OS=Mus musculus GN=Mast1 PE=1 SV=3	Mast1	206832	210196	206832	49180.1	80750.3	117215	0	0	0	0	0	0	0	0	0	0	0	0	0	0	0	0	0	0
Q8BHL3	1	1	40.92	TBC1 domain family member 10B OS=Mus musculus GN=Tbc1d10b PE=1 SV=2	Tbc1d10b	272945	377051	272945	513393	228211	61510.1	415052	510046	286916	488907	241274	347455	524896	307774	323780	548264	313256	628499	0	0	0	0	0	0
Q9QY76	1	1	43.22	Vesicle-associated membrane protein-associated protein B OS=Mus musculus GN=Vapb PE=1 SV=3	Vapb	215217	363038	215217	134802	335508	370304	1.31732e+06	784523	1.33929e+06	2.15062e+06	1.15938e+06	1.33768e+06	660106	490585	589016	1.21503e+06	353061	580379	732585	1.08009e+06	906623	559034	2.03537e+06	1.17988e+06
Q63932	1	1	87.29	Dual specificity mitogen-activated protein kinase kinase 2 OS=Mus musculus GN=Map2k2 PE=1 SV=2	Map2k2	41.0842	856.866	41.0842	223676	277955	203516	844866	916178	825153	1.41551e+06	1.73386	2190.87	755374	787796	946149	1.77335e+06	613630	857091	1.24083e+06	1.59291e+06	1.03977e+06	1.31028e+06	2.75502e+06	2.24748e+06
Q9CZM2	1	1	42.88	60S ribosomal protein L15 OS=Mus musculus GN=Rpl15 PE=2 SV=4	Rpl15	684909	893457	684909	37761.1	36732.6	19116.1	0	0	0	0	0	0	0	0	0	0	0	0	0	0	0	0	0	0
Q9DB15	1	1	29.23	39S ribosomal protein L12, mitochondrial OS=Mus musculus GN=Mrpl12 PE=1 SV=2	Mrpl12	20493	57799.5	20493	442201	72130.2	261510	103216	568552	475663	572204	592593	193516	834980	960624	1.8555e+06	1.95085e+06	615423	827742	1.09656e+06	1.11779e+06	2.80222e+06	1.26832e+06	2.42714e+06	440927
Q91WK5	1	1	31.12	Glycine cleavage system H protein, mitochondrial OS=Mus musculus GN=Gcsh PE=1 SV=2	Gcsh	37482	275274	37482	882139	429048	490694	378777	48726.9	13037.7	30276	1.27982e+06	1.00135e+06	610961	652499	425573	739932	311700	820935	0	0	0	0	0	0
O55013	1	1	31.76	Trafficking protein particle complex subunit 3 OS=Mus musculus GN=Trappc3 PE=1 SV=1	Trappc3	210195	245865	210195	66576.7	33657.8	247959	0	0	0	0	0	0	0	0	0	0	0	0	0	0	0	0	0	0
Q8R1B4	1	1	54.7	Eukaryotic translation initiation factor 3 subunit C OS=Mus musculus GN=Eif3c PE=1 SV=1	Eif3c	90205.1	137354	90205.1	151405	269740	147793	537173	411866	147430	275620	30338.2	229304	526704	556387	455645	1.05448e+06	171963	350341	456288	748626	894495	1.11894e+06	848253	1.05645e+06
P62748	1	1	34.14	Hippocalcin-like protein 1 OS=Mus musculus GN=Hpcal1 PE=1 SV=2	Hpcal1	84783	378339	84783	1.70913e+06	387379	631163	256786	253026	441110	489903	1.09547e+06	703248	0	0	0	0	0	0	1.35148e+06	1.87446e+06	852968	514820	2.72431e+06	4.24612e+06
Q9D7A8	1	1	29.39	Armadillo repeat-containing protein 1 OS=Mus musculus GN=Armc1 PE=1 SV=1	Armc1	789265	1.1455e+06	789265	1.3862e+06	932350	1.21108e+06	90229.8	136338	511247	804211	71891.6	520011	545031	356001	990057	630586	542358	1.07396e+06	889770	1.11268e+06	270920	186417	1.07456e+06	705224
P14602	1	1	60.39	Heat shock protein beta-1 OS=Mus musculus GN=Hspb1 PE=1 SV=3	Hspb1	443380	509326	443380	1.58801e+06	1.199e+06	1.15309e+06	324402	293472	829273	1.37368e+06	947055	1.0861e+06	849704	1.44983e+06	552268	940123	528640	1.23387e+06	890580	1.32952e+06	958026	1.07746e+06	1.9311e+06	1.7438e+06
O08919	1	1	43.03	Numb-like protein OS=Mus musculus GN=Numbl PE=1 SV=3	Numbl	188595	281761	188595	59893	235942	248730	264957	479517	53248	101665	25066.3	43179.8	5656.18	17369.2	8912.43	233130	299091	231565	554446	372700	759650	577366	408953	524693
Q922S4	1	1	60.59	cGMP-dependent 3',5'-cyclic phosphodiesterase OS=Mus musculus GN=Pde2a PE=1 SV=3	Pde2a	312571	480224	312571	385593	868704	896013	627226	604575	164862	297901	227098	275984	267745	335995	275741	1.00835e+06	151475	372290	225538	254152	623011	1.05787e+06	167364	340976
Q8K0T0	1	1	51.17	Reticulon-1 OS=Mus musculus GN=Rtn1 PE=1 SV=1	Rtn1	470966	891756	470966	2.4798e+06	979488	1.55455e+06	3.79471e+06	4.23273e+06	4.88345e+06	7.44566e+06	2.70853e+06	3.07911e+06	2.48312e+06	2.30831e+06	2.34296e+06	1.33528e+06	2.86008e+06	3.21392e+06	7.00177e+06	1.02058e+07	5.52111e+06	6.67686e+06	1.41681e+07	1.41004e+07
Q8VCH0	1	1	52.51	3-ketoacyl-CoA thiolase B, peroxisomal OS=Mus musculus GN=Acaa1b PE=1 SV=1	Acaa1b	242528	207532	242528	149518	103800	122592	0	0	0	0	0	0	0	0	0	0	0	0	0	0	0	0	0	0
Q8R2R9	1	1	32.61	AP-3 complex subunit mu-2 OS=Mus musculus GN=Ap3m2 PE=1 SV=1	Ap3m2	110016	276330	110016	408165	293509	266874	401764	432781	146498	224943	189731	290467	171995	75610.5	200457	515616	73803.4	209071	165549	391197	94408.7	288556	405432	442860
P14131	2	2	196.05	40S ribosomal protein S16 OS=Mus musculus GN=Rps16 PE=1 SV=4	Rps16	1.38304e+06	2.62139e+06	1.38304e+06	2.98137e+06	2.29468e+06	2.43096e+06	2.31573e+06	3.35486e+06	154942	322428	1.85717e+06	2.44477e+06	2.0406e+06	1.08939e+06	1.53723e+06	3.69277e+06	1.3673e+06	2.49677e+06	4.27904e+06	7.56078e+06	5.1382e+06	7.6026e+06	7.23261e+06	1.14474e+07
P54071	7	7	336.69	Isocitrate dehydrogenase [NADP], mitochondrial OS=Mus musculus GN=Idh2 PE=1 SV=3	Idh2	889272	1.17451e+06	889272	1.8656e+06	1.48808e+06	1.29581e+06	2.5225e+06	2.8632e+06	3.73879e+06	5.52073e+06	2.61447e+06	4.44485e+06	1.62951e+06	2.67477e+06	3.26264e+06	5.13683e+06	1.05457e+06	2.08387e+06	2.03249e+06	1.51486e+06	2.64177e+06	2.26738e+06	5.04211e+06	5.85903e+06
Q5SRX1	7	7	468.03	TOM1-like protein 2 OS=Mus musculus GN=Tom1l2 PE=1 SV=1	Tom1l2	1.88051e+06	2.80745e+06	1.88051e+06	6.21278e+06	4.71132e+06	3.73913e+06	3.17217e+06	4.41232e+06	7.3329e+06	9.83968e+06	6.5608e+06	6.80745e+06	6.27991e+06	7.71258e+06	3.96091e+06	2.23289e+06	4.79737e+06	7.05288e+06	7.88848e+06	1.07088e+07	7.92639e+06	5.94517e+06	4.65051e+06	9.72537e+06
Q62261	7	7	451.45	Spectrin beta chain, non-erythrocytic 1 OS=Mus musculus GN=Sptbn1 PE=1 SV=2	Sptbn1	1.66397e+06	2.46812e+06	1.66397e+06	2.54897e+06	2.35365e+06	3.6496e+06	1.94141e+06	2.10822e+06	1.57831e+06	2.81542e+06	956548	1.06619e+06	1.74211e+06	1.93574e+06	1.94194e+06	2.2955e+06	1.46719e+06	2.84346e+06	1.93194e+06	2.2008e+06	3.61788e+06	3.5825e+06	3.61028e+06	4.01753e+06
Q91W50	7	7	461.45	Cold shock domain-containing protein E1 OS=Mus musculus GN=Csde1 PE=1 SV=1	Csde1	1.44631e+06	1.94161e+06	1.44631e+06	1.77895e+06	1.17446e+06	1.34329e+06	717533	643992	810463	1.3278e+06	835071	1.03279e+06	600629	676229	621659	924666	194671	474260	919925	1.54095e+06	1.10799e+06	878554	1.55067e+06	1.65732e+06
Q91ZZ3	6	6	516.43	Beta-synuclein OS=Mus musculus GN=Sncb PE=1 SV=1	Sncb	2.20837e+07	2.35929e+07	2.20837e+07	3.63519e+07	1.91008e+07	2.18509e+07	3.4183e+07	4.38275e+07	2.0185e+07	3.54698e+07	3.6993e+07	3.35603e+07	1.45137e+07	1.66228e+07	1.66996e+07	2.71136e+07	1.56127e+07	2.49113e+07	2.27661e+07	3.55451e+07	4.23651e+07	3.2965e+07	2.76599e+07	3.38418e+07
Q8K0U4	7	7	357.06	Heat shock 70 kDa protein 12A OS=Mus musculus GN=Hspa12a PE=1 SV=1	Hspa12a	2.34181e+06	2.95953e+06	2.34181e+06	1.6103e+06	1.61515e+06	2.2913e+06	1.95046e+06	1.65652e+06	2.26733e+06	3.36536e+06	2.70682e+06	2.96432e+06	2.22005e+06	2.33676e+06	1.36227e+06	1.8024e+06	1.38756e+06	2.3152e+06	2.57686e+06	3.30747e+06	4.04614e+06	3.13972e+06	4.8532e+06	6.25546e+06
P70336	7	7	370.88	Rho-associated protein kinase 2 OS=Mus musculus GN=Rock2 PE=1 SV=1	Rock2	690995	1.04617e+06	690995	1.1384e+06	635371	825773	1.76882e+06	1.84773e+06	3.15657e+06	4.22501e+06	2.82229e+06	1.37023e+06	1.43789e+06	1.95399e+06	2.97363e+06	3.18087e+06	1.27465e+06	1.9156e+06	1.0697e+06	1.00991e+06	1.53702e+06	1.04933e+06	2.17464e+06	956712
Q8BWT1	7	7	396.94	3-ketoacyl-CoA thiolase, mitochondrial OS=Mus musculus GN=Acaa2 PE=1 SV=3	Acaa2	4.14753e+06	5.50758e+06	4.14753e+06	5.08047e+06	4.73735e+06	4.3675e+06	4.68521e+06	3.95422e+06	1.84188e+06	3.16079e+06	3.79523e+06	3.7597e+06	2.64958e+06	2.88303e+06	2.90089e+06	5.52902e+06	1.82866e+06	3.29796e+06	3.68673e+06	5.52382e+06	4.43003e+06	4.34444e+06	6.25355e+06	6.18303e+06
P14206	7	7	478.44	40S ribosomal protein SA OS=Mus musculus GN=Rpsa PE=1 SV=4	Rpsa	7.83188e+06	1.01065e+07	7.83188e+06	1.06726e+07	7.20295e+06	9.06723e+06	2.88589e+06	1.71219e+06	4.77488e+06	6.9929e+06	5.5112e+06	6.41998e+06	3.55353e+06	4.59506e+06	3.31036e+06	3.4828e+06	2.92958e+06	5.21236e+06	9.12829e+06	1.18306e+07	1.08985e+07	8.53766e+06	1.45247e+07	1.83875e+07
P07724	7	7	385.2	Serum albumin OS=Mus musculus GN=Alb PE=1 SV=3	Alb	5.71582e+06	7.17224e+06	5.71582e+06	6.6973e+06	3.24221e+06	5.11971e+06	9.29084e+06	9.21538e+06	3.72092e+06	5.98768e+06	1.29603e+07	1.60322e+07	5.51215e+06	6.31383e+06	7.83873e+06	1.02963e+07	3.69264e+06	5.32415e+06	8.80487e+06	1.42806e+07	1.13538e+07	9.38612e+06	1.67473e+07	1.81208e+07
P46096	7	7	438.34	Synaptotagmin-1 OS=Mus musculus GN=Syt1 PE=1 SV=1	Syt1	7.07201e+06	9.66293e+06	7.07201e+06	8.95773e+06	8.93772e+06	9.99581e+06	3.37347e+06	7.08691e+06	7.27688e+06	9.74314e+06	5.40938e+06	6.36308e+06	1.13368e+07	1.45795e+07	9.01104e+06	1.2378e+07	8.2702e+06	1.10108e+07	1.0288e+07	1.80743e+07	2.05956e+07	1.63321e+07	1.98638e+07	2.05035e+07
P70404	7	7	514.84	Isocitrate dehydrogenase [NAD] subunit gamma 1, mitochondrial OS=Mus musculus GN=Idh3g PE=1 SV=1	Idh3g	2.00854e+06	3.16501e+06	2.00854e+06	4.86854e+06	3.16527e+06	4.75892e+06	3.91196e+06	2.90215e+06	3.71982e+06	5.17404e+06	5.11176e+06	6.88261e+06	3.15362e+06	4.24043e+06	3.19973e+06	5.69336e+06	2.13256e+06	3.88865e+06	5.0213e+06	7.59552e+06	2.7854e+06	3.14008e+06	7.55116e+06	7.24613e+06
Q9R0P3	7	7	536.97	S-formylglutathione hydrolase OS=Mus musculus GN=Esd PE=1 SV=1	Esd	3.75425e+06	4.65323e+06	3.75425e+06	6.73638e+06	3.01346e+06	5.00017e+06	6.81893e+06	5.11012e+06	8.0023e+06	1.17789e+07	9.52382e+06	9.67015e+06	4.32908e+06	4.05766e+06	4.98858e+06	6.79993e+06	3.07355e+06	6.58536e+06	7.5516e+06	1.08823e+07	8.3195e+06	8.09588e+06	9.23951e+06	1.18771e+07
Q9D8Y0	7	7	664.07	EF-hand domain-containing protein D2 OS=Mus musculus GN=Efhd2 PE=1 SV=1	Efhd2	3.38923e+06	4.06351e+06	3.38923e+06	3.29759e+06	2.23546e+06	2.25369e+06	2.29501e+06	2.45521e+06	1.49281e+06	2.89554e+06	2.45934e+06	2.99225e+06	982031	1.66152e+06	1.13521e+06	1.08303e+06	971667	1.22781e+06	1.0491e+06	1.98679e+06	2.8085e+06	1.60976e+06	2.1592e+06	2.35569e+06
Q9Z140	6	6	286.98	Copine-6 OS=Mus musculus GN=Cpne6 PE=1 SV=1	Cpne6	3.11949e+06	3.94772e+06	3.11949e+06	2.76978e+06	6.35085e+06	7.6198e+06	3.92402e+06	2.8262e+06	2.67718e+06	4.59641e+06	1.63258e+06	2.44486e+06	4.80043e+06	4.25336e+06	6.91984e+06	9.91907e+06	1.8542e+06	3.37379e+06	7.6357e+06	8.54588e+06	1.06793e+07	1.3417e+07	9.79575e+06	9.57919e+06
P53810	6	6	412.59	Phosphatidylinositol transfer protein alpha isoform OS=Mus musculus GN=Pitpna PE=1 SV=2	Pitpna	1.71993e+06	2.99555e+06	1.71993e+06	3.38217e+06	2.27589e+06	2.25203e+06	3.37734e+06	3.73148e+06	1.06219e+06	1.99515e+06	2.85328e+06	4.34646e+06	1.47961e+06	1.44966e+06	1.36306e+06	2.56792e+06	1.31509e+06	2.31112e+06	2.40081e+06	3.76177e+06	2.06858e+06	2.24928e+06	3.07085e+06	2.26162e+06
Q00623	6	6	485.43	Apolipoprotein A-I OS=Mus musculus GN=Apoa1 PE=1 SV=2	Apoa1	3.82418e+06	5.05872e+06	3.82418e+06	4.99912e+06	2.08312e+06	1.862e+06	3.09481e+06	4.26702e+06	160551	206644	2.48937e+06	2.40793e+06	4.08876e+06	5.14859e+06	5.80633e+06	1.20898e+07	4.12257e+06	5.89714e+06	5.95741e+06	8.86672e+06	1.01855e+07	9.91113e+06	1.2693e+07	1.36685e+07
P59999	6	6	382	Actin-related protein 2/3 complex subunit 4 OS=Mus musculus GN=Arpc4 PE=1 SV=3	Arpc4	2.51392e+06	3.39781e+06	2.51392e+06	4.62866e+06	6.17487e+06	7.34366e+06	8.82262e+06	5.86224e+06	4.8629e+06	8.36148e+06	3.10125e+06	3.82523e+06	5.33881e+06	7.73224e+06	5.6672e+06	8.25128e+06	3.09339e+06	5.38655e+06	6.01808e+06	8.42483e+06	5.62807e+06	6.51638e+06	1.14279e+07	1.1938e+07
Q9DCD0	6	6	385.52	6-phosphogluconate dehydrogenase, decarboxylating OS=Mus musculus GN=Pgd PE=1 SV=3	Pgd	771862	954361	771862	916886	918452	993939	3.06149e+06	3.23401e+06	1.00679e+06	1.84478e+06	2.77018e+06	3.09752e+06	1.50805e+06	1.34968e+06	1.14353e+06	1.7415e+06	1.14533e+06	2.15575e+06	2.96843e+06	4.29219e+06	2.57686e+06	2.44299e+06	3.63818e+06	3.89447e+06
Q9Z2H5	6	6	319.28	Band 4.1-like protein 1 OS=Mus musculus GN=Epb41l1 PE=1 SV=2	Epb41l1	7.01326e+06	9.26767e+06	7.01326e+06	5.20022e+06	9.71461e+06	9.93819e+06	1.15721e+07	1.24533e+07	1.05637e+07	1.50911e+07	5.53084e+06	5.95519e+06	2.93403e+06	2.83236e+06	3.12193e+06	2.61128e+06	1.93891e+06	3.51722e+06	4.32128e+06	1.02029e+07	1.06496e+07	8.3655e+06	1.66462e+07	1.66839e+07
P20108	6	6	384.13	Thioredoxin-dependent peroxide reductase, mitochondrial OS=Mus musculus GN=Prdx3 PE=1 SV=1	Prdx3	1.53861e+06	1.65009e+06	1.53861e+06	1.97374e+06	1.15401e+06	1.51223e+06	3.39606e+06	3.973e+06	1.8658e+06	3.45153e+06	5.75534e+06	8.53266e+06	2.72958e+06	4.22011e+06	2.55825e+06	3.39077e+06	2.54192e+06	4.07812e+06	5.98656e+06	8.83788e+06	4.08499e+06	4.35494e+06	4.70709e+06	5.52268e+06
P60879	6	6	428.52	Synaptosomal-associated protein 25 OS=Mus musculus GN=Snap25 PE=1 SV=1	Snap25	5.35439e+06	6.19376e+06	5.35439e+06	9.56659e+06	4.70431e+06	5.85665e+06	1.08253e+07	9.71527e+06	4.08263e+06	6.67193e+06	4.63419e+06	7.18021e+06	5.44811e+06	4.27257e+06	6.15282e+06	1.05375e+07	3.61909e+06	6.91258e+06	6.572e+06	1.09314e+07	6.66595e+06	8.22393e+06	1.11006e+07	1.49176e+07
P60843	6	5	425.81	Eukaryotic initiation factor 4A-I OS=Mus musculus GN=Eif4a1 PE=1 SV=1	Eif4a1	6.83604e+06	7.65717e+06	6.83604e+06	1.30231e+07	6.84971e+06	7.02147e+06	8.96552e+06	1.19552e+07	9.27739e+06	1.78113e+07	9.94388e+06	1.37455e+07	6.97107e+06	7.53096e+06	7.37436e+06	1.02676e+07	6.05012e+06	1.18779e+07	1.02151e+07	1.81117e+07	9.116e+06	1.14886e+07	1.86465e+07	2.33598e+07
P97315	6	6	483.45	Cysteine and glycine-rich protein 1 OS=Mus musculus GN=Csrp1 PE=1 SV=3	Csrp1	1.16189e+07	1.44562e+07	1.16189e+07	1.62821e+07	1.0377e+07	1.23661e+07	1.12009e+07	1.36778e+07	8.04561e+06	1.40612e+07	1.84626e+07	2.14862e+07	7.93464e+06	7.65279e+06	6.25051e+06	9.89924e+06	5.45342e+06	1.28334e+07	5.79877e+06	1.41356e+07	7.64175e+06	9.17193e+06	2.14009e+07	2.12307e+07
Q99JY9	6	6	380.77	Actin-related protein 3 OS=Mus musculus GN=Actr3 PE=1 SV=3	Actr3	1.41477e+07	1.85758e+07	1.41477e+07	1.01949e+07	7.26404e+06	8.96814e+06	5.36502e+06	5.43524e+06	1.06196e+07	1.5099e+07	6.69578e+06	4.96813e+06	8.26802e+06	1.06583e+07	1.01758e+07	7.06856e+06	6.87694e+06	1.31223e+07	1.30195e+07	1.64628e+07	1.32625e+07	1.00185e+07	2.43682e+07	2.57743e+07
P26883	6	6	477.05	Peptidyl-prolyl cis-trans isomerase FKBP1A OS=Mus musculus GN=Fkbp1a PE=1 SV=2	Fkbp1a	1.73488e+07	2.70573e+07	1.73488e+07	2.49974e+07	1.32697e+07	1.8512e+07	2.71921e+07	2.98084e+07	1.21683e+06	1.77124e+06	1.58428e+07	2.33358e+07	9.35493e+06	6.31851e+06	1.17647e+07	1.61425e+07	1.15953e+07	1.6979e+07	1.46746e+07	2.07216e+07	1.75241e+07	1.87895e+07	1.98201e+07	2.32908e+07
P84086	6	6	544.3	Complexin-2 OS=Mus musculus GN=Cplx2 PE=1 SV=1	Cplx2	4.06755e+07	5.35676e+07	4.06755e+07	6.02775e+07	4.65262e+07	5.58811e+07	3.97932e+07	2.68594e+07	4.04729e+07	6.55222e+07	4.11625e+07	5.98371e+07	4.36489e+07	4.76195e+07	3.86721e+07	4.43472e+07	2.81024e+07	4.83137e+07	5.20012e+07	8.49661e+07	5.14926e+07	4.29344e+07	6.87674e+07	7.60956e+07
Q8BVE3	6	6	343.85	V-type proton ATPase subunit H OS=Mus musculus GN=Atp6v1h PE=1 SV=1	Atp6v1h	3.46962e+06	5.44937e+06	3.46962e+06	1.01583e+07	5.90445e+06	6.49986e+06	1.24919e+07	1.29319e+07	1.1592e+07	1.74707e+07	1.18822e+07	1.41921e+07	8.59439e+06	9.9457e+06	9.42327e+06	1.31864e+07	6.49003e+06	1.03262e+07	1.28518e+07	1.75934e+07	1.53099e+07	1.19945e+07	2.53997e+07	3.34766e+07
Q60829	6	6	365.54	Protein phosphatase 1 regulatory subunit 1B OS=Mus musculus GN=Ppp1r1b PE=1 SV=2	Ppp1r1b	1.42316e+07	1.828e+07	1.42316e+07	1.87726e+07	7.7539e+06	8.49854e+06	9.02529e+06	9.25248e+06	1.08188e+07	1.85119e+07	9.69455e+06	9.88414e+06	3.12117e+06	2.65039e+06	7.10145e+06	9.96401e+06	9.1055e+06	1.74436e+07	7.51367e+06	1.56597e+07	2.84386e+06	4.02978e+06	1.09144e+07	9.60309e+06
Q61548	6	6	578.65	Clathrin coat assembly protein AP180 OS=Mus musculus GN=Snap91 PE=1 SV=1	Snap91	6.27446e+06	7.75203e+06	6.27446e+06	1.10119e+07	1.614e+06	1.12368e+07	1.19511e+07	4.3697e+07	1.45554e+07	1.97944e+07	1.06777e+07	1.13072e+07	8.57081e+06	1.32285e+07	7.5748e+06	1.5467e+07	6.63606e+06	9.48283e+06	9.56683e+06	1.37084e+07	2.38254e+07	2.03789e+07	1.20051e+07	1.15517e+07
Q9D0F9	8	8	527.73	Phosphoglucomutase-1 OS=Mus musculus GN=Pgm1 PE=1 SV=4	Pgm1	1.20579e+06	1.59889e+06	1.20579e+06	4.40853e+06	2.05731e+06	2.02764e+06	3.08716e+06	1.26494e+06	5.22123e+06	6.40972e+06	7.0178e+06	2.91684e+06	4.02505e+06	4.54815e+06	5.80846e+06	5.91553e+06	2.8774e+06	3.92109e+06	4.90986e+06	5.6156e+06	9.89147e+06	9.06101e+06	8.01619e+06	8.16826e+06
P60487	8	8	289.19	Pyridoxal phosphate phosphatase OS=Mus musculus GN=Pdxp PE=1 SV=1	Pdxp	1.23786e+06	1.75033e+06	1.23786e+06	2.9202e+06	2.69148e+06	4.90886e+06	4.02716e+06	2.88037e+06	2.28802e+06	3.6367e+06	3.79564e+06	3.3639e+06	3.18614e+06	3.60154e+06	4.0306e+06	2.95804e+06	2.19508e+06	3.93343e+06	3.30956e+06	4.80811e+06	4.49459e+06	6.01184e+06	6.26783e+06	5.32635e+06
O55131	8	7	576.92	Septin-7 OS=Mus musculus GN=Sept7 PE=1 SV=1	2007-09-01	3.77942e+06	4.99348e+06	3.77942e+06	6.2209e+06	5.10295e+06	5.70837e+06	3.60243e+06	3.00407e+06	6.52463e+06	1.04771e+07	6.31523e+06	9.57809e+06	5.40067e+06	5.74082e+06	6.20092e+06	5.65527e+06	5.43797e+06	8.03578e+06	8.19284e+06	1.03465e+07	9.01856e+06	8.24143e+06	1.34913e+07	1.29159e+07
Q61768	8	8	332.11	Kinesin-1 heavy chain OS=Mus musculus GN=Kif5b PE=1 SV=3	Kif5b	2.09698e+06	2.38343e+06	2.09698e+06	2.16191e+06	1.13098e+06	1.77878e+06	2.86863e+06	2.0119e+06	1.80146e+06	4.05909e+06	2.3332e+06	3.02545e+06	2.25791e+06	2.53382e+06	2.85584e+06	3.08961e+06	1.56815e+06	2.41269e+06	3.15594e+06	4.70616e+06	5.01396e+06	3.71529e+06	4.98178e+06	5.43023e+06
Q9EQ20	8	8	518.55	Methylmalonate-semialdehyde dehydrogenase [acylating], mitochondrial OS=Mus musculus GN=Aldh6a1 PE=1 SV=1	Aldh6a1	4.11856e+06	5.61774e+06	4.11856e+06	7.20865e+06	7.26469e+06	1.07069e+07	9.95483e+06	1.00144e+07	4.42009e+06	6.442e+06	8.14448e+06	6.30441e+06	7.21913e+06	9.53533e+06	7.43619e+06	8.82946e+06	2.34607e+06	7.42813e+06	1.12858e+07	1.46261e+07	8.38334e+06	9.50617e+06	1.5254e+07	1.72611e+07
Q7TSJ2	8	8	473.98	Microtubule-associated protein 6 OS=Mus musculus GN=Map6 PE=1 SV=2	Map6	1.10206e+07	1.42629e+07	1.10206e+07	9.85671e+06	6.85145e+06	7.8867e+06	9.37548e+06	7.55758e+06	1.69088e+07	2.61577e+07	9.88431e+06	1.13061e+07	6.3372e+06	6.93606e+06	5.84074e+06	8.38272e+06	6.34638e+06	9.98112e+06	6.64049e+06	9.76988e+06	8.83697e+06	8.73037e+06	1.16481e+07	1.41881e+07
P62962	8	8	485.25	Profilin-1 OS=Mus musculus GN=Pfn1 PE=1 SV=2	Pfn1	7.39125e+06	1.02e+07	7.39125e+06	1.66859e+07	1.01212e+07	1.24252e+07	1.56821e+07	1.58383e+07	1.69068e+07	2.54883e+07	1.88876e+07	2.15237e+07	1.38354e+07	1.31886e+07	1.92779e+07	1.65546e+07	8.56609e+06	1.32959e+07	1.88897e+07	2.56655e+07	2.07726e+07	1.89267e+07	4.99066e+07	5.09415e+07
P62874	8	8	544.68	Guanine nucleotide-binding protein G(I)/G(S)/G(T) subunit beta-1 OS=Mus musculus GN=Gnb1 PE=1 SV=3	Gnb1	4.29981e+06	5.92859e+06	4.29981e+06	1.06836e+07	1.11466e+07	7.94301e+06	1.28681e+07	7.82336e+06	1.32248e+07	2.01669e+07	8.79502e+06	9.42014e+06	5.19575e+06	7.0556e+06	6.77673e+06	1.21173e+07	3.35762e+06	6.55634e+06	6.85571e+06	1.03194e+07	5.85587e+06	7.51238e+06	1.06001e+07	9.39671e+06
Q9R0P5	8	8	502.06	Destrin OS=Mus musculus GN=Dstn PE=1 SV=3	Dstn	3.99369e+06	4.76458e+06	3.99369e+06	2.66282e+06	1.81295e+06	1.96978e+06	2.95825e+06	3.18501e+06	1.01003e+06	1.22015e+06	3.53701e+06	3.6503e+06	1.38598e+06	1.81578e+06	866733	1.2081e+06	1.30919e+06	1.7128e+06	2.41006e+06	3.82446e+06	2.00564e+06	2.58353e+06	2.12422e+06	2.82209e+06
P40124	8	8	516.5	Adenylyl cyclase-associated protein 1 OS=Mus musculus GN=Cap1 PE=1 SV=4	Cap1	2.72934e+06	3.40469e+06	2.72934e+06	7.07207e+06	5.27844e+06	5.10014e+06	7.60269e+06	8.06783e+06	8.7318e+06	1.38728e+07	6.11299e+06	8.11132e+06	5.66453e+06	7.45979e+06	9.27634e+06	1.25649e+07	4.29667e+06	8.43637e+06	7.95189e+06	1.39901e+07	1.17883e+07	1.18994e+07	1.21913e+07	1.28789e+07
Q99PT1	7	6	471.34	Rho GDP-dissociation inhibitor 1 OS=Mus musculus GN=Arhgdia PE=1 SV=3	Arhgdia	6.64743e+06	1.02821e+07	6.64743e+06	1.44719e+07	7.35837e+06	7.96017e+06	2.29966e+07	3.27941e+07	5.01605e+07	6.37228e+07	3.72503e+07	4.62611e+07	8.36293e+06	8.45329e+06	1.16544e+07	1.76651e+07	8.67684e+06	1.27539e+07	3.69568e+07	4.18535e+07	3.38471e+07	3.18979e+07	6.40003e+07	6.21269e+07
Q9D172	7	7	616.8	ES1 protein homolog, mitochondrial OS=Mus musculus GN=D10Jhu81e PE=1 SV=1	D10Jhu81e	1.30926e+07	1.89771e+07	1.30926e+07	2.45994e+07	1.41241e+07	1.78634e+07	1.90541e+07	2.1085e+07	2.39408e+07	3.68239e+07	2.15456e+07	3.22292e+07	1.14719e+07	1.88221e+07	1.5253e+07	2.66488e+07	1.23761e+07	1.88173e+07	1.63814e+07	2.19233e+07	1.25905e+07	1.63134e+07	2.32411e+07	3.21815e+07
P19157	7	7	562.92	Glutathione S-transferase P 1 OS=Mus musculus GN=Gstp1 PE=1 SV=2	Gstp1	1.05585e+07	1.3427e+07	1.05585e+07	3.50871e+07	2.94641e+07	2.08241e+07	4.73101e+07	2.30094e+07	3.63251e+07	5.145e+07	3.49435e+07	3.90298e+07	2.53662e+07	2.30153e+07	3.47487e+07	8.1124e+07	1.70186e+07	3.06248e+07	1.66822e+07	5.90666e+07	3.38201e+07	3.8038e+07	4.00743e+07	5.91854e+07
P68510	7	7	509.14	14-3-3 protein eta OS=Mus musculus GN=Ywhah PE=1 SV=2	Ywhah	2.28871e+07	3.14136e+07	2.28871e+07	6.14194e+07	3.19807e+07	4.21256e+07	5.70814e+07	4.90235e+07	4.34489e+07	7.01422e+07	5.2033e+07	5.37627e+07	3.14864e+07	3.63383e+07	4.08659e+07	7.28992e+07	2.95956e+07	5.29183e+07	6.17378e+07	7.49857e+07	4.3536e+07	5.30402e+07	7.5637e+07	8.83733e+07
Q9DBG3	7	7	514.01	AP-2 complex subunit beta OS=Mus musculus GN=Ap2b1 PE=1 SV=1	Ap2b1	1.6419e+06	2.42687e+06	1.6419e+06	2.6173e+06	1.2935e+06	1.38574e+06	4.91078e+06	4.42174e+06	2.50244e+06	3.74588e+06	5.66874e+06	5.86441e+06	1.5038e+06	1.42045e+06	1.8044e+06	2.15905e+06	1.32408e+06	1.97875e+06	4.22736e+06	6.17717e+06	4.175e+06	3.43311e+06	4.18796e+06	5.645e+06
Q9JJV2	7	7	451.01	Profilin-2 OS=Mus musculus GN=Pfn2 PE=1 SV=3	Pfn2	1.05364e+07	1.21806e+07	1.05364e+07	1.51452e+06	602782	456038	1.99391e+06	2.04377e+06	1.89292e+06	3.33017e+06	2.54855e+06	3.54047e+06	846319	1.70603e+06	1.21124e+06	1.77442e+06	844128	1.42136e+06	1.69712e+06	2.60566e+06	1.20525e+06	1.82073e+06	2.75383e+06	3.03792e+06
Q9DCW4	8	8	524.16	Electron transfer flavoprotein subunit beta OS=Mus musculus GN=Etfb PE=1 SV=3	Etfb	2.49592e+06	3.17185e+06	2.49592e+06	4.02574e+06	2.98543e+06	3.75157e+06	3.73192e+06	2.93924e+06	2.97382e+06	4.51133e+06	4.37161e+06	5.2254e+06	3.39483e+06	4.26805e+06	5.22838e+06	6.34527e+06	2.93269e+06	4.35486e+06	5.23377e+06	8.29952e+06	3.07666e+06	3.58903e+06	9.72814e+06	9.77823e+06
Q8BPN8	8	8	379.98	DmX-like protein 2 OS=Mus musculus GN=Dmxl2 PE=1 SV=3	Dmxl2	2.69455e+06	4.27316e+06	2.69455e+06	3.63622e+06	1.85243e+06	2.30723e+06	2.19623e+06	3.40467e+06	3.19551e+06	5.20705e+06	2.96272e+06	3.3992e+06	2.6288e+06	2.77346e+06	2.66396e+06	3.49001e+06	2.16359e+06	3.17918e+06	3.99646e+06	4.72432e+06	4.75598e+06	3.89887e+06	7.32048e+06	8.0455e+06
P13707	8	8	396.52	Glycerol-3-phosphate dehydrogenase [NAD(+)], cytoplasmic OS=Mus musculus GN=Gpd1 PE=1 SV=3	Gpd1	1.58502e+06	2.35301e+06	1.58502e+06	6.26084e+06	1.33431e+06	1.50521e+06	2.79806e+06	2.22535e+06	3.06201e+06	5.38972e+06	4.68423e+06	5.36039e+06	3.69902e+06	4.96641e+06	3.05844e+06	4.0186e+06	2.03027e+06	3.8615e+06	4.01404e+06	6.12521e+06	2.57347e+06	2.6565e+06	5.61792e+06	5.57868e+06
P04370	7	7	763.04	Myelin basic protein OS=Mus musculus GN=Mbp PE=1 SV=2	Mbp	9.58765e+07	1.43771e+08	9.58765e+07	1.37219e+08	1.26884e+08	1.319e+08	1.2674e+08	1.32023e+08	3.97985e+07	4.74376e+07	5.14288e+07	9.01388e+07	5.08507e+07	7.01769e+07	3.95328e+07	6.64406e+07	4.35726e+07	7.44464e+07	7.4955e+07	1.22293e+08	1.10297e+08	1.01967e+08	1.09882e+08	1.16555e+08
Q8BZ98	8	6	346.04	Dynamin-3 OS=Mus musculus GN=Dnm3 PE=1 SV=1	Dnm3	375534	448758	375534	513041	456677	685781	1.82818e+06	824630	1.47909e+06	2.19803e+06	1.30469e+06	1.65035e+06	2.51714e+06	2.35517e+06	2.77253e+06	6.84849e+06	1.15322e+06	2.18764e+06	2.57985e+06	3.65139e+06	3.22569e+06	3.32557e+06	3.93304e+06	3.76486e+06
P63028	5	5	386.19	Translationally-controlled tumor protein OS=Mus musculus GN=Tpt1 PE=1 SV=1	Tpt1	2.54734e+06	3.48504e+06	2.54734e+06	7.79752e+06	5.35751e+06	5.7133e+06	8.77397e+06	7.1395e+06	5.58933e+06	9.39065e+06	8.00832e+06	1.00589e+07	6.39809e+06	9.22537e+06	6.62234e+06	1.36971e+07	5.8935e+06	8.96445e+06	7.4907e+06	1.19648e+07	7.84567e+06	7.37966e+06	1.2797e+07	1.44953e+07
Q9D8N0	5	5	316.89	Elongation factor 1-gamma OS=Mus musculus GN=Eef1g PE=1 SV=3	Eef1g	2.66603e+06	3.65833e+06	2.66603e+06	4.64367e+06	2.22065e+06	2.99512e+06	2.95884e+06	3.27622e+06	2.70204e+06	4.31277e+06	3.74066e+06	4.68912e+06	2.2858e+06	1.61192e+06	1.37699e+06	2.31864e+06	2.27946e+06	3.80579e+06	3.40535e+06	5.14972e+06	1.94928e+06	2.54466e+06	5.03821e+06	5.20417e+06
Q9D819	5	5	253.21	Inorganic pyrophosphatase OS=Mus musculus GN=Ppa1 PE=1 SV=1	Ppa1	1.32754e+06	1.93727e+06	1.32754e+06	6.30572e+06	2.1455e+06	2.25208e+06	5.06635e+06	2.84907e+06	3.80316e+06	6.3836e+06	5.56791e+06	6.86953e+06	2.55261e+06	2.34557e+06	2.25654e+06	2.59358e+06	1.65199e+06	2.54254e+06	4.23286e+06	5.88349e+06	3.55253e+06	3.33666e+06	6.2185e+06	6.65601e+06
Q9QZX7	5	5	239.29	Serine racemase OS=Mus musculus GN=Srr PE=1 SV=1	Srr	2.77379e+06	3.31327e+06	2.77379e+06	3.36379e+06	1.46394e+06	1.56228e+06	3.26274e+06	3.72471e+06	3.82534e+06	5.77379e+06	1.66891e+06	2.46658e+06	1.22464e+06	1.70991e+06	2.45187e+06	3.98619e+06	1.42678e+06	2.91603e+06	3.56733e+06	4.87914e+06	3.79334e+06	5.04525e+06	4.56865e+06	5.73123e+06
P62761	5	5	243.14	Visinin-like protein 1 OS=Mus musculus GN=Vsnl1 PE=1 SV=2	Vsnl1	3.41531e+06	4.93193e+06	3.41531e+06	7.06623e+06	4.38136e+06	6.0103e+06	4.57095e+06	4.63613e+06	5.77393e+06	8.09431e+06	7.49116e+06	8.82996e+06	4.34501e+06	5.89317e+06	4.6215e+06	9.63801e+06	3.64092e+06	6.00422e+06	6.91989e+06	1.05545e+07	9.95098e+06	8.43368e+06	1.31463e+07	2.15052e+07
P48453	5	5	256.41	Serine/threonine-protein phosphatase 2B catalytic subunit beta isoform OS=Mus musculus GN=Ppp3cb PE=1 SV=2	Ppp3cb	2.41171e+06	3.44613e+06	2.41171e+06	4.10446e+06	1.79488e+06	2.19258e+06	2.24887e+06	2.4118e+06	2.70808e+06	3.86271e+06	2.40721e+06	3.31171e+06	1.32792e+06	873168	1.30179e+06	2.12236e+06	1.34529e+06	2.46746e+06	2.78886e+06	3.78837e+06	2.27549e+06	2.56711e+06	3.98608e+06	4.29527e+06
Q9WTT4	5	5	288.66	V-type proton ATPase subunit G 2 OS=Mus musculus GN=Atp6v1g2 PE=1 SV=1	Atp6v1g2	9.56969e+06	1.43402e+07	9.56969e+06	1.91045e+07	2.6065e+07	3.68709e+07	2.59689e+07	2.31327e+07	1.51475e+07	2.15276e+07	5.32663e+06	1.71872e+07	2.82165e+07	2.69071e+07	2.38367e+07	2.62825e+07	1.36562e+07	2.02376e+07	2.51294e+07	4.26091e+07	2.19528e+07	2.43031e+07	5.95612e+07	5.52016e+07
P54227	5	5	446.49	Stathmin OS=Mus musculus GN=Stmn1 PE=1 SV=2	Stmn1	5.77824e+06	9.96352e+06	5.77824e+06	9.67643e+06	5.966e+06	7.34387e+06	9.59018e+06	9.63281e+06	6.88573e+06	8.8364e+06	3.89502e+06	1.36602e+07	4.31042e+06	4.48e+06	6.97851e+06	7.34507e+06	4.56515e+06	6.35514e+06	8.10303e+06	9.91399e+06	5.8472e+06	8.21699e+06	1.40449e+07	1.43721e+07
P31786	5	5	330.22	Acyl-CoA-binding protein OS=Mus musculus GN=Dbi PE=1 SV=2	Dbi	5.50017e+06	7.36629e+06	5.50017e+06	4.01228e+07	1.31118e+07	1.51573e+07	3.58624e+07	3.84881e+07	1.78191e+07	3.02737e+07	3.81591e+07	4.48993e+07	2.66965e+07	2.6462e+07	5.40262e+07	6.19609e+07	2.16372e+07	3.83664e+07	4.11719e+07	6.24467e+07	3.1912e+07	3.64787e+07	1.02161e+08	9.81839e+07
Q7TQD2	5	5	372.46	Tubulin polymerization-promoting protein OS=Mus musculus GN=Tppp PE=1 SV=1	Tppp	7.93263e+06	9.20208e+06	7.93263e+06	8.89821e+06	6.02457e+06	2.57841e+07	2.52897e+07	1.23943e+07	2.36253e+07	3.62794e+07	3.00454e+07	3.23142e+07	1.71409e+07	2.39506e+07	1.48522e+07	2.20771e+07	9.81223e+06	2.13041e+07	2.47946e+07	3.56852e+07	4.67009e+07	5.10571e+07	3.35498e+07	2.99241e+07
P34022	5	4	341.17	Ran-specific GTPase-activating protein OS=Mus musculus GN=Ranbp1 PE=1 SV=2	Ranbp1	733778	931704	733778	1.15199e+06	894935	836379	2.54564e+06	4.74664e+06	3.87583e+06	5.58197e+06	5.5691e+06	5.62328e+06	2.24566e+06	1.89067e+06	3.06657e+06	2.59762e+06	1.88413e+06	2.91493e+06	1.13262e+06	1.78898e+06	572064	1.13752e+06	1.08655e+06	1.26866e+06
P63085	5	4	382.22	Mitogen-activated protein kinase 1 OS=Mus musculus GN=Mapk1 PE=1 SV=3	Mapk1	6.81272e+06	9.84323e+06	6.81272e+06	1.2438e+07	9.77739e+06	1.1042e+07	4.65842e+06	6.48093e+06	4.64729e+06	7.61137e+06	3.69463e+06	5.08296e+06	8.69936e+06	9.56877e+06	7.88464e+06	1.08033e+07	8.81272e+06	1.40929e+07	1.44041e+07	1.9465e+07	1.30139e+07	1.30686e+07	1.93218e+07	2.74286e+07
P28663	5	5	358.92	Beta-soluble NSF attachment protein OS=Mus musculus GN=Napb PE=1 SV=2	Napb	1.20085e+06	1.76151e+06	1.20085e+06	2.10851e+06	1.13885e+06	1.9522e+06	1.61603e+06	1.43666e+06	1.74798e+06	2.25459e+06	1.02729e+06	2.3246e+06	1.52145e+06	1.62354e+06	1.1826e+06	1.61859e+06	1.12326e+06	2.09169e+06	1.84832e+06	2.34598e+06	1.26538e+06	1.45006e+06	2.94868e+06	2.94793e+06
P24549	5	5	311.32	Retinal dehydrogenase 1 OS=Mus musculus GN=Aldh1a1 PE=1 SV=5	Aldh1a1	938186	1.18585e+06	938186	3.13893e+06	720336	905620	1.92009e+06	1.60994e+06	682137	988366	3.08485e+06	4.12038e+06	1.18594e+06	1.11146e+06	1.84448e+06	2.49805e+06	1.30846e+06	2.10774e+06	1.80787e+06	2.8394e+06	684673	707248	4.15425e+06	4.75956e+06
Q62465	5	5	274.33	Synaptic vesicle membrane protein VAT-1 homolog OS=Mus musculus GN=Vat1 PE=1 SV=3	Vat1	1.32607e+06	2.09334e+06	1.32607e+06	1.87346e+06	1.16448e+06	1.36292e+06	3.14692e+06	3.02709e+06	2.74958e+06	4.65921e+06	2.14569e+06	2.39321e+06	1.18217e+06	974592	1.8868e+06	2.64014e+06	1.36396e+06	2.19653e+06	1.59138e+06	2.19645e+06	1.73035e+06	2.05217e+06	4.53711e+06	4.85292e+06
O55126	5	5	160.9	Protein NipSnap homolog 2 OS=Mus musculus GN=Gbas PE=1 SV=1	Gbas	1.02381e+06	1.43147e+06	1.02381e+06	3.97382e+06	1.1838e+06	2.27012e+06	2.90157e+06	3.09699e+06	2.15965e+06	2.96824e+06	4.16642e+06	5.71141e+06	897760	808876	1.34143e+06	947671	427194	920268	2.84665e+06	3.27652e+06	3.09785e+06	2.96844e+06	4.13489e+06	5.55035e+06
P24472	5	5	289.82	Glutathione S-transferase A4 OS=Mus musculus GN=Gsta4 PE=1 SV=3	Gsta4	2.16807e+06	2.50506e+06	2.16807e+06	4.90996e+06	2.05128e+06	2.46711e+06	2.93237e+06	3.7324e+06	1.6625e+06	2.89138e+06	1.74957e+06	2.5695e+06	835194	702403	688998	1.05926e+06	763207	1.23559e+06	202546	497128	232698	341344	250523	410203
Q99L47	5	4	237.6	Hsc70-interacting protein OS=Mus musculus GN=St13 PE=1 SV=1	St13	940418	1.03627e+06	940418	582545	555044	582202	2.1927e+06	2.05374e+06	1.75639e+06	2.3483e+06	2.01595e+06	2.27091e+06	1.46831e+06	1.55104e+06	2.11817e+06	2.25368e+06	827096	1.89818e+06	2.21614e+06	4.83891e+06	3.12233e+06	2.39555e+06	5.40622e+06	6.26259e+06
Q9DCL9	5	5	411.12	Multifunctional protein ADE2 OS=Mus musculus GN=Paics PE=1 SV=4	Paics	1.25332e+06	2.10899e+06	1.25332e+06	2.87623e+06	1.52005e+06	835907	2.24225e+06	1.79538e+06	3.71274e+06	5.11915e+06	4.14444e+06	5.47824e+06	2.2329e+06	2.49723e+06	3.59408e+06	4.38403e+06	2.38734e+06	3.22984e+06	2.93854e+06	4.12002e+06	2.45336e+06	2.43558e+06	5.36109e+06	5.54627e+06
P51174	5	5	241.18	Long-chain specific acyl-CoA dehydrogenase, mitochondrial OS=Mus musculus GN=Acadl PE=1 SV=2	Acadl	1.20073e+06	1.77772e+06	1.20073e+06	2.08105e+06	1.88982e+06	2.29382e+06	2.6382e+06	2.40572e+06	2.45669e+06	3.71606e+06	3.02278e+06	3.8392e+06	2.60691e+06	2.05556e+06	2.80527e+06	3.02344e+06	1.67703e+06	2.42666e+06	2.13596e+06	2.97274e+06	1.06688e+06	1.25097e+06	3.92153e+06	3.8637e+06
P16054	5	5	208.74	Protein kinase C epsilon type OS=Mus musculus GN=Prkce PE=1 SV=1	Prkce	947797	1.59464e+06	947797	1.74132e+06	1.58087e+06	1.63649e+06	3.90438e+06	3.29719e+06	2.68469e+06	4.12477e+06	1.55376e+06	1.78701e+06	1.92081e+06	2.15613e+06	2.63285e+06	3.14137e+06	1.32853e+06	2.42825e+06	2.955e+06	4.69462e+06	4.23529e+06	3.77903e+06	3.45163e+06	3.38458e+06
P61161	5	5	393.96	Actin-related protein 2 OS=Mus musculus GN=Actr2 PE=1 SV=1	Actr2	1.48382e+06	1.83414e+06	1.48382e+06	1.04676e+06	1.14367e+06	1.05743e+06	1.54754e+06	716720	1.24885e+06	1.87536e+06	2.00724e+06	2.08976e+06	1.00169e+06	1.40585e+06	1.42958e+06	1.45229e+06	942976	1.35778e+06	1.52836e+06	2.34292e+06	1.81169e+06	1.6589e+06	2.426e+06	2.61042e+06
Q810U3	5	5	263.34	Neurofascin OS=Mus musculus GN=Nfasc PE=1 SV=1	Nfasc	840144	1.11349e+06	840144	4.42779e+06	4.67342e+06	4.94883e+06	3.44208e+06	1.38996e+06	3.71241e+06	5.18287e+06	3.12486e+06	2.25136e+06	5.82121e+06	5.86044e+06	6.451e+06	6.51976e+06	2.32274e+06	4.59626e+06	4.6656e+06	5.91749e+06	8.03739e+06	6.66949e+06	9.22174e+06	9.51618e+06
Q5M8N0	6	6	397.06	CB1 cannabinoid receptor-interacting protein 1 OS=Mus musculus GN=Cnrip1 PE=1 SV=1	Cnrip1	2.25259e+06	3.34558e+06	2.25259e+06	2.83266e+06	2.15913e+06	2.09369e+06	1.62993e+06	2.90514e+06	1.72283e+06	2.71907e+06	1.85832e+06	2.48667e+06	1.33954e+06	1.43593e+06	1.38883e+06	1.86556e+06	1.40736e+06	2.32163e+06	1.49103e+06	1.88698e+06	2.19771e+06	2.01821e+06	1.93861e+06	2.05141e+06
Q9QXY6	6	6	260.99	EH domain-containing protein 3 OS=Mus musculus GN=Ehd3 PE=1 SV=2	Ehd3	5.51392e+06	6.7769e+06	5.51392e+06	3.51024e+06	2.77595e+06	3.88398e+06	1.41167e+06	994958	1.6075e+06	2.49993e+06	2.41948e+06	1.87048e+06	1.8241e+06	2.47358e+06	1.92271e+06	2.23195e+06	1.72524e+06	2.43997e+06	4.29386e+06	6.91542e+06	4.40434e+06	3.17085e+06	6.05779e+06	5.82469e+06
O55125	6	6	270.74	Protein NipSnap homolog 1 OS=Mus musculus GN=Nipsnap1 PE=1 SV=1	Nipsnap1	1.01155e+06	1.51823e+06	1.01155e+06	2.52754e+06	1.22771e+06	1.94999e+06	1.56657e+06	1.24897e+06	1.9188e+06	2.99367e+06	3.83349e+06	3.43593e+06	2.06354e+06	2.78225e+06	1.99435e+06	2.01327e+06	1.83631e+06	2.37365e+06	5.13623e+06	7.47533e+06	5.7545e+06	4.35539e+06	7.59571e+06	8.22238e+06
Q9D154	6	6	384.32	Leukocyte elastase inhibitor A OS=Mus musculus GN=Serpinb1a PE=1 SV=1	Serpinb1a	584524	754019	584524	1.48774e+06	688862	979936	1.3492e+06	1.6868e+06	100498	238112	843557	2.15423e+06	937563	628432	1.01813e+06	1.50666e+06	694557	1.12298e+06	1.90838e+06	2.8296e+06	1.39428e+06	1.68619e+06	3.35381e+06	3.91535e+06
Q9R1Q8	6	6	342.28	Transgelin-3 OS=Mus musculus GN=Tagln3 PE=1 SV=1	Tagln3	5.34221e+06	6.9703e+06	5.34221e+06	9.63225e+06	4.84025e+06	7.54602e+06	6.56916e+06	6.78691e+06	9.283e+06	1.40633e+07	1.26493e+07	1.34198e+07	5.9462e+06	8.42359e+06	6.12739e+06	1.14638e+07	4.859e+06	8.22857e+06	7.16043e+06	1.06469e+07	6.27214e+06	5.92541e+06	1.86319e+07	2.44615e+07
Q68FF6	6	6	295.84	ARF GTPase-activating protein GIT1 OS=Mus musculus GN=Git1 PE=1 SV=1	Git1	2.27705e+06	3.00123e+06	2.27705e+06	3.56863e+06	1.53168e+06	2.57016e+06	3.37721e+06	2.32919e+06	2.72117e+06	3.92476e+06	1.82141e+06	1.64502e+06	1.97979e+06	2.3868e+06	2.52669e+06	1.89267e+06	1.55834e+06	2.51927e+06	3.07855e+06	3.55504e+06	4.14686e+06	2.92654e+06	3.73133e+06	4.34242e+06
P05202	6	6	353.57	Aspartate aminotransferase, mitochondrial OS=Mus musculus GN=Got2 PE=1 SV=1	Got2	1.13378e+06	1.56743e+06	1.13378e+06	4.54531e+06	4.42152e+06	5.75751e+06	5.59649e+06	2.0166e+06	5.7267e+06	1.06581e+07	5.84828e+06	7.87605e+06	3.62114e+06	3.93574e+06	8.64153e+06	1.70783e+07	2.2465e+06	3.50094e+06	2.10963e+06	5.24744e+06	4.16818e+06	4.73153e+06	1.52639e+07	1.71342e+07
Q8K0S0	6	6	328.04	Phytanoyl-CoA hydroxylase-interacting protein OS=Mus musculus GN=Phyhip PE=1 SV=1	Phyhip	744904	1.09684e+06	744904	913816	1.01044e+06	1.15666e+06	1.53213e+06	1.83643e+06	1.70507e+06	2.53804e+06	2.18328e+06	1.92202e+06	704384	626626	1.11504e+06	2.23894e+06	878145	1.50834e+06	1.8527e+06	3.33484e+06	1.81448e+06	1.72861e+06	3.01719e+06	3.21881e+06
P61264	6	6	509.51	Syntaxin-1B OS=Mus musculus GN=Stx1b PE=1 SV=1	Stx1b	1.90366e+06	2.80117e+06	1.90366e+06	1.62758e+06	2.82552e+06	3.33364e+06	7.87047e+06	9.82008e+06	3.81019e+06	3.90609e+06	5.7945e+06	7.00295e+06	3.18769e+06	2.0449e+06	3.99289e+06	6.93247e+06	2.96184e+06	5.23171e+06	2.74748e+06	4.37155e+06	3.54665e+06	3.95774e+06	6.12938e+06	7.19966e+06
Q9Z0H8	6	6	238.58	CAP-Gly domain-containing linker protein 2 OS=Mus musculus GN=Clip2 PE=1 SV=2	Clip2	292728	360536	292728	724126	385329	383254	1.07494e+06	1.28195e+06	845396	1.14515e+06	550218	965550	903702	927599	1.20784e+06	2.48953e+06	474943	1.24195e+06	1.23381e+06	2.0214e+06	1.35059e+06	1.85089e+06	1.79608e+06	2.60852e+06
P62204	7	7	582.6	Calmodulin OS=Mus musculus GN=Calm1 PE=1 SV=2	Calm1	3.35673e+07	5.27806e+07	3.35673e+07	1.03369e+08	4.32504e+07	3.81605e+07	8.60482e+07	8.29574e+07	7.69257e+07	1.05943e+08	2.21956e+08	1.80947e+08	6.53967e+07	5.57277e+07	5.23485e+07	6.31923e+07	5.81535e+07	7.80265e+07	1.14876e+08	1.20498e+08	5.92701e+07	6.08188e+07	9.35892e+07	8.5787e+07
Q99K51	6	6	323.8	Plastin-3 OS=Mus musculus GN=Pls3 PE=1 SV=3	Pls3	656428	880382	656428	732701	737920	1.07717e+06	420572	452868	593093	869983	340273	701774	664018	951661	479453	666484	473477	701546	728372	1.40549e+06	547087	675350	1.53375e+06	1.52348e+06
Q9Z2Q6	6	6	318.21	Septin-5 OS=Mus musculus GN=Sept5 PE=1 SV=2	2005-09-01	2.36378e+06	3.0274e+06	2.36378e+06	3.83751e+06	1.52458e+06	2.74133e+06	3.4565e+06	3.42784e+06	2.28239e+06	4.41067e+06	2.18251e+06	2.47882e+06	1.60634e+06	1.51659e+06	3.18703e+06	4.06038e+06	1.48147e+06	2.73706e+06	2.81903e+06	3.15195e+06	2.97432e+06	3.025e+06	3.98667e+06	4.21813e+06
P12960	6	6	270.53	Contactin-1 OS=Mus musculus GN=Cntn1 PE=1 SV=1	Cntn1	1.97398e+06	3.23264e+06	1.97398e+06	2.33749e+06	1.22787e+06	1.80785e+06	2.4459e+06	3.61976e+06	1.73928e+06	2.52536e+06	4.92023e+06	5.00104e+06	2.19115e+06	2.10286e+06	2.15641e+06	3.64325e+06	1.47192e+06	2.58975e+06	2.37321e+06	3.76073e+06	2.54251e+06	3.1473e+06	5.80545e+06	7.63746e+06
P46664	6	6	310.95	Adenylosuccinate synthetase isozyme 2 OS=Mus musculus GN=Adss PE=1 SV=2	Adss	3.16731e+06	3.79399e+06	3.16731e+06	1.33885e+06	773775	2.57109e+06	1.13255e+06	729658	1.825e+06	2.95731e+06	1.71684e+06	2.50455e+06	1.49484e+06	1.64642e+06	1.86068e+06	2.39366e+06	1.16649e+06	2.07241e+06	3.74122e+06	4.76171e+06	5.62199e+06	5.57722e+06	7.57657e+06	1.01964e+07
Q3UPL0	6	6	220.68	Protein transport protein Sec31A OS=Mus musculus GN=Sec31a PE=1 SV=2	Sec31a	1.08795e+06	1.4822e+06	1.08795e+06	651415	294525	456858	568129	294212	421860	716480	448659	407082	555422	520678	709392	443692	730853	976480	950840	1.43798e+06	769100	930337	1.17357e+06	1.29949e+06
Q9Z1B3	6	6	361.78	1-phosphatidylinositol 4,5-bisphosphate phosphodiesterase beta-1 OS=Mus musculus GN=Plcb1 PE=1 SV=2	Plcb1	1.29311e+06	1.70728e+06	1.29311e+06	1.07494e+06	1.15959e+06	1.14831e+06	3.58739e+06	4.22155e+06	2.97972e+06	4.4188e+06	3.03964e+06	4.23573e+06	1.57872e+06	2.86734e+06	1.77122e+06	1.46545e+06	1.75819e+06	2.43787e+06	2.66045e+06	3.38102e+06	3.89442e+06	4.02791e+06	3.07088e+06	2.80907e+06
Q9ERD7	17	15	1705.88	Tubulin beta-3 chain OS=Mus musculus GN=Tubb3 PE=1 SV=1	Tubb3	1.19228e+08	1.69786e+08	1.19228e+08	2.13942e+08	9.58972e+07	1.15819e+08	3.93732e+07	6.45135e+07	1.16339e+08	1.57958e+08	1.23031e+08	1.14258e+08	7.96392e+07	9.25257e+07	1.01317e+08	8.63893e+07	9.6559e+07	1.29034e+08	1.45181e+08	1.96621e+08	1.4347e+08	1.28338e+08	2.0058e+08	2.25167e+08
Q62188	16	16	1222.69	Dihydropyrimidinase-related protein 3 OS=Mus musculus GN=Dpysl3 PE=1 SV=1	Dpysl3	1.09106e+07	1.63345e+07	1.09106e+07	1.4952e+07	9.73601e+06	1.16755e+07	8.78284e+06	1.02632e+07	7.66283e+06	1.08025e+07	1.3435e+07	1.58732e+07	8.49025e+06	7.72042e+06	6.88662e+06	7.45326e+06	7.26939e+06	1.29156e+07	1.521e+07	2.16698e+07	1.58317e+07	1.47808e+07	2.62462e+07	2.22347e+07
Q80TJ1	17	17	978.21	Calcium-dependent secretion activator 1 OS=Mus musculus GN=Cadps PE=1 SV=3	Cadps	3.24898e+06	4.3409e+06	3.24898e+06	7.22262e+06	1.0846e+06	4.45175e+06	4.59515e+06	2.44239e+06	7.76611e+06	9.89706e+06	9.10601e+06	1.03367e+07	5.76694e+06	8.17793e+06	5.69426e+06	7.79848e+06	4.22879e+06	5.86576e+06	8.16303e+06	1.09239e+07	1.10551e+07	7.43489e+06	1.17772e+07	1.35445e+07
P61922	17	17	1079.49	4-aminobutyrate aminotransferase, mitochondrial OS=Mus musculus GN=Abat PE=1 SV=1	Abat	9.1776e+06	1.27539e+07	9.1776e+06	1.4327e+07	9.10666e+06	9.78691e+06	1.433e+07	1.67005e+07	2.84141e+07	4.22082e+07	3.49422e+07	4.74045e+07	2.29774e+07	3.14196e+07	2.84985e+07	4.82395e+07	1.71966e+07	2.2585e+07	3.49558e+07	4.70699e+07	3.16976e+07	2.41955e+07	7.00133e+07	7.39833e+07
P17710	17	17	1109.29	Hexokinase-1 OS=Mus musculus GN=Hk1 PE=1 SV=3	Hk1	6.10779e+06	9.24213e+06	6.10779e+06	1.05414e+07	6.27006e+06	8.36597e+06	1.01694e+07	9.28469e+06	9.77224e+06	1.54676e+07	1.21077e+07	1.1061e+07	8.97831e+06	8.8654e+06	9.81885e+06	1.02697e+07	4.99567e+06	8.77378e+06	1.01733e+07	1.49665e+07	1.37903e+07	1.16374e+07	2.44146e+07	2.32127e+07
P68368	15	15	1236.19	Tubulin alpha-4A chain OS=Mus musculus GN=Tuba4a PE=1 SV=1	Tuba4a	1.53348e+08	2.00078e+08	1.53348e+08	1.72317e+08	1.15187e+08	1.50191e+08	1.11202e+08	1.09951e+08	1.59774e+08	2.5631e+08	1.99698e+08	2.14835e+08	1.17233e+08	1.39066e+08	1.14053e+08	1.34943e+08	9.11842e+07	1.36447e+08	1.82074e+08	2.4069e+08	2.7077e+08	2.10458e+08	2.86083e+08	3.65815e+08
P06151	15	15	855.59	L-lactate dehydrogenase A chain OS=Mus musculus GN=Ldha PE=1 SV=3	Ldha	3.21772e+07	4.4837e+07	3.21772e+07	5.9189e+07	4.55993e+07	6.43039e+07	1.0634e+07	3.21443e+07	4.06977e+07	5.39841e+07	2.58873e+07	2.95262e+07	3.93972e+07	5.15409e+07	4.33191e+07	3.93212e+07	3.03659e+07	4.25049e+07	5.63911e+07	8.94713e+07	8.01309e+07	7.02587e+07	8.09815e+07	8.77054e+07
Q8BWF0	16	16	1214.17	Succinate-semialdehyde dehydrogenase, mitochondrial OS=Mus musculus GN=Aldh5a1 PE=1 SV=1	Aldh5a1	1.41364e+07	1.83313e+07	1.41364e+07	1.1237e+07	9.35797e+06	1.0659e+07	1.29178e+07	1.29219e+07	1.68876e+07	2.44559e+07	2.2004e+07	2.26926e+07	1.22462e+07	1.4162e+07	1.04906e+07	1.55542e+07	9.86089e+06	1.41918e+07	1.70758e+07	2.33689e+07	2.08501e+07	1.71663e+07	3.29173e+07	4.04668e+07
Q03265	16	15	1167.81	ATP synthase subunit alpha, mitochondrial OS=Mus musculus GN=Atp5a1 PE=1 SV=1	Atp5a1	5.1928e+06	5.86351e+06	5.1928e+06	1.71389e+07	1.02338e+07	1.21737e+07	1.31826e+07	1.12356e+07	1.07489e+07	1.44851e+07	1.51175e+07	1.78504e+07	1.79881e+07	2.02625e+07	1.38237e+07	2.67408e+07	1.14815e+07	1.75345e+07	2.10079e+07	2.47649e+07	1.76914e+07	1.92551e+07	2.79132e+07	3.72868e+07
Q11011	17	17	983.48	Puromycin-sensitive aminopeptidase OS=Mus musculus GN=Npepps PE=1 SV=2	Npepps	9.32148e+06	1.2313e+07	9.32148e+06	1.45622e+07	9.77126e+06	1.22064e+07	1.07098e+07	1.00366e+07	1.60203e+07	2.34602e+07	1.31094e+07	1.55842e+07	9.51819e+06	1.20775e+07	1.10936e+07	1.55314e+07	9.63511e+06	1.54474e+07	1.71008e+07	2.52182e+07	2.13988e+07	1.82931e+07	2.69771e+07	3.4649e+07
P05064	19	19	1967.4	Fructose-bisphosphate aldolase A OS=Mus musculus GN=Aldoa PE=1 SV=2	Aldoa	1.48998e+08	2.24232e+08	1.48998e+08	2.00827e+08	1.55635e+08	1.8642e+08	1.73126e+08	1.8792e+08	1.47674e+08	2.57075e+08	1.71092e+08	2.36847e+08	1.19374e+08	1.43525e+08	8.62095e+07	1.69615e+08	8.24387e+07	1.22466e+08	1.71522e+08	2.43049e+08	2.34608e+08	1.83509e+08	2.4913e+08	3.83879e+08
P30275	18	18	1353.4	Creatine kinase U-type, mitochondrial OS=Mus musculus GN=Ckmt1 PE=1 SV=1	Ckmt1	2.04764e+07	2.99006e+07	2.04764e+07	3.2537e+07	2.08e+07	3.75873e+07	3.3636e+07	2.65083e+07	1.93639e+07	3.51786e+07	3.68959e+07	4.73392e+07	2.97469e+07	3.90924e+07	2.89674e+07	3.95579e+07	3.01998e+07	3.56655e+07	5.19253e+07	7.00253e+07	2.98225e+07	3.62261e+07	5.75451e+07	5.71249e+07
[truncated: 637 more rows]
