# Supplementary material for: Distinct and diverse chromatin proteomes of ageing mouse organs reveal protein signatures that correlate with physiological functions
Source: eLife journal article supplement (doi:10.7554/elife.73524), 2022-03-08
Supplement: supp [file elife-73524-supp-v1.zip › elife_poa_e73524_Supplementary_file_3.xlsx]

## Sheet: brain
									Normalized abundance																								Raw abundance
									3 months						5 months						10 months						15 months						3 months					5 months						10 months
Accession	Peptide count	Unique peptides	Confidence score	Anova (p)	Max fold change	Highest mean condition	Lowest mean condition	Description	BRAIN_3_1_1	BRAIN_3_1	BRAIN_3_2_2	BRAIN_3_2	BRAIN_3_3_3	BRAIN_3_3	BRAIN_5_1_1	BRAIN_5_1	BRAIN_5_2_2	BRAIN_5_2	BRAIN_5_3_3	BRAIN_5_3	BRAIN_10_1_1	BRAIN_10_1	BRAIN_10_2_2	BRAIN_10_2	BRAIN_10_3_3	BRAIN_10_3	BRAIN_15_1_1	BRAIN_15_1	BRAIN_15_2_2	BRAIN_15_2	BRAIN_15_3_3	BRAIN_15_3	BRAIN_3_1_1	BRAIN_3_1	BRAIN_3_2_2	BRAIN_3_2	BRAIN_3_3_3	BRAIN_3_3	BRAIN_5_1_1	BRAIN_5_1	BRAIN_5_2_2	BRAIN_5_2	BRAIN_5_3_3	BRAIN_5_3	BRAIN_10_1_1	BRAIN_10_1	BRAIN_10_2_2	BRAIN_10_2	BRAIN_10_3_3
Q91ZW3	23	21	1292.3	0	2.23164	Condition 4	Condition 1	SWI/SNF-related matrix-associated actin-dependent regulator of chromatin subfamily A member 5 OS=Mus musculus GN=Smarca5 PE=1 SV=1	388254	421683	418279	400340	444889	410663	856645	833281	794545	887302	835716	918723	947760	1.01017e+06	864209	869041	914279	904642	920600	993377	912910	908369	919210	889175	308578	376925	323106	380597	348496	389464	638707	833281	660809	889385	717139	927681	507160	586783	487379	598579	516667
P47963	4	4	195.31	0	3.21336	Condition 1	Condition 2	60S ribosomal protein L13 OS=Mus musculus GN=Rpl13 PE=1 SV=3	304720	336589	369627	340265	340742	351577	106031	106549	102863	112192	103022	105286	135413	149408	137635	162981	135432	140258	131861	116369	115545	120305	112175	113184	242187	300863	285524	323485	266914	333428	79056.1	106549	85549.3	112456	88404.7	106313	72461.7	86787.7	77620.4	112258	76533.8
Q5DTM8	4	3	378.72	0	20.1691	Condition 1	Condition 4	E3 ubiquitin-protein ligase BRE1A OS=Mus musculus OX=10090 GN=Rnf20 PE=1 SV=2	239656	240831	276664	270908	223700	266333	10876.8	19046.5	15387.8	20228.2	15323	19527.9	14266.5	13037.9	14508.5	16938.1	12364.9	15025.9	11867.6	12343.8	14054.9	13299.2	12352.6	11350	190474	215269	213714	257548	175232	252585	8109.63	19046.5	12797.8	20275.7	13148.8	19718.3	7634.22	7573.45	8182.22	11666.6	6987.52
P62918	4	4	213.93	0	8.88389	Condition 1	Condition 2	60S ribosomal protein L8 OS=Mus musculus GN=Rpl8 PE=1 SV=2	342876	330791	334781	324060	319788	302582	29929.6	40757.9	37888.2	35656	41210.9	34604.9	37729.8	39082.9	46121.4	44920.4	36626.7	46021.2	50302.1	42820.8	48562.9	51757.1	41586.2	49668.8	272513	295680	258607	308078	250500	286962	22315.2	40757.9	31510.9	35739.7	35363.6	34942.3	20189.8	22702.4	26010.6	30940.3	20698.1
Q9D8E6	4	4	237.03	0	20.2738	Condition 1	Condition 2	60S ribosomal protein L4 OS=Mus musculus GN=Rpl4 PE=1 SV=3	264017	300686	293105	301679	281493	300253	13861.1	11796.5	19532.7	14461.8	13119.4	13114.5	19303.3	23986	16623.2	22802.1	21774.7	22255.6	21168.4	26412.1	12202.7	21717.1	24324.2	17635.2	209837	268771	226414	286801	220503	284754	10334.7	11796.5	16245	14495.8	11257.9	13242.4	10329.5	13932.9	9374.82	15705.7	12305.1
Q8VE37	10	10	819.07	0	2.72291	Condition 3	Condition 1	Regulator of chromosome condensation OS=Mus musculus GN=Rcc1 PE=1 SV=1	948729	975473	864725	910240	936311	876304	1.87614e+06	1.79416e+06	1.9361e+06	1.86535e+06	1.99978e+06	1.85343e+06	2.55697e+06	2.64629e+06	2.42916e+06	2.51816e+06	2.51642e+06	2.34111e+06	2.17385e+06	2.25292e+06	2.18781e+06	2.10768e+06	2.37802e+06	2.10522e+06	754035	871936	667971	865350	733443	831068	1.39883e+06	1.79416e+06	1.61022e+06	1.86973e+06	1.71604e+06	1.8715e+06	1.36827e+06	1.53717e+06	1.36995e+06	1.73446e+06	1.42205e+06
P12970	4	4	188.63	0	18.756	Condition 1	Condition 2	60S ribosomal protein L7a OS=Mus musculus GN=Rpl7a PE=1 SV=2	431269	465231	508939	511087	467376	453036	27781.8	28009.7	21931.3	16902.1	22965.9	33664.1	24887.6	35161.7	33219.8	30120.8	24239.1	27781.8	25365.3	40199	30146.3	28378.5	26428.4	35505.3	342766	415851	393139	485882	366111	429650	20713.9	28009.7	18239.9	16941.8	19707.4	33992.4	13317.7	20424.7	18734.7	20746.6	13697.7
Q9CPQ8	4	4	314.99	0	2.26739	Condition 4	Condition 1	ATP synthase subunit g, mitochondrial OS=Mus musculus GN=Atp5l PE=1 SV=1	1.17942e+06	1.2445e+06	1.14829e+06	1.17234e+06	1.0474e+06	1.16595e+06	2.1e+06	2.0529e+06	1.98289e+06	2.06345e+06	1.9272e+06	2.11102e+06	2.30461e+06	2.29381e+06	2.15689e+06	2.21908e+06	2.19154e+06	2.29846e+06	2.49904e+06	2.61071e+06	2.77511e+06	2.76014e+06	2.54098e+06	2.59031e+06	937385	1.11241e+06	887016	1.11453e+06	820464	1.10576e+06	1.56574e+06	2.0529e+06	1.64914e+06	2.06829e+06	1.65376e+06	2.1316e+06	1.23323e+06	1.33242e+06	1.2164e+06	1.52846e+06	1.23846e+06
P01872	5	5	281.56	0	6.98349	Condition 4	Condition 1	Ig mu chain C region OS=Mus musculus GN=Ighm PE=1 SV=2	68253.5	88108.6	86057.3	80173.4	59983	83242.5	158138	171447	143540	164438	146886	173336	456510	523769	476502	529956	482375	438678	584316	485610	544680	554677	570790	512966	54246.8	78756.7	66476.4	76219.5	46986.6	78945.4	117906	171447	119380	164824	126045	175026	244285	304246	268728	365023	272594
Q64288	5	5	491.49	0	34.8844	Condition 4	Condition 1	Olfactory marker protein OS=Mus musculus GN=Omp PE=1 SV=3	36955.5	33837.6	29163.2	40345.3	41767.2	39736.5	484684	451730	399535	437678	425659	419684	769433	799418	708718	704119	815001	811404	1.30506e+06	1.41259e+06	1.10121e+06	1.29386e+06	1.35896e+06	1.26586e+06	29371.6	30246.1	22527.6	38355.6	32717.6	37685.2	361376	451730	332286	438705	365264	423776	411735	464364	399689	484983	460565
Q9D0M3	5	5	323.35	0	3.43749	Condition 4	Condition 1	Cytochrome c1, heme protein, mitochondrial OS=Mus musculus GN=Cyc1 PE=1 SV=1	343530	403731	379445	359893	342359	353945	752130	760873	761870	866042	765819	788576	841232	863700	810854	874916	884881	817260	1.23625e+06	1.17729e+06	1.24041e+06	1.30718e+06	1.27968e+06	1.2629e+06	273033	360879	293109	342144	268181	335674	560782	760873	633634	868075	657160	796264	450155	501704	457289	602625	500054
Q8R081	28	28	2554.16	0	1.89152	Condition 3	Condition 1	Heterogeneous nuclear ribonucleoprotein L OS=Mus musculus GN=Hnrnpl PE=1 SV=2	2.47776e+07	2.67559e+07	2.47984e+07	2.48879e+07	2.4558e+07	2.58387e+07	4.47245e+07	4.29376e+07	4.50984e+07	4.61159e+07	4.21165e+07	4.38878e+07	4.63954e+07	5.27896e+07	4.76459e+07	4.86789e+07	4.59052e+07	4.537e+07	4.49359e+07	4.96671e+07	4.82937e+07	4.79096e+07	4.69353e+07	4.73051e+07	1.96928e+07	2.3916e+07	1.9156e+07	2.36605e+07	1.92371e+07	2.45049e+07	3.33462e+07	4.29376e+07	3.75076e+07	4.62241e+07	3.61407e+07	4.43157e+07	2.48268e+07	3.06643e+07	2.68704e+07	3.35291e+07	2.59414e+07
P12660	4	4	321.56	0	2.45753	Condition 2	Condition 1	Purkinje cell protein 2 OS=Mus musculus GN=Pcp2 PE=1 SV=2	1.72438e+06	1.79114e+06	1.83139e+06	1.85743e+06	1.74946e+06	1.76839e+06	4.56747e+06	4.40742e+06	4.41261e+06	4.41467e+06	4.17508e+06	4.37289e+06	2.80752e+06	3.30533e+06	2.70194e+06	3.05946e+06	2.96157e+06	2.9393e+06	1.97735e+06	2.21481e+06	2.0986e+06	1.99171e+06	2.19362e+06	2.02621e+06	1.37051e+06	1.60103e+06	1.41468e+06	1.76583e+06	1.37041e+06	1.6771e+06	3.40547e+06	4.40742e+06	3.66989e+06	4.42504e+06	3.58269e+06	4.41552e+06	1.50234e+06	1.91999e+06	1.52379e+06	2.1073e+06	1.67361e+06
Q8CGP0	4	4	251.89	0	5.95212	Condition 3	Condition 1	Histone H2B type 3-B OS=Mus musculus GN=Hist3h2bb PE=1 SV=3	2.56911e+06	2.46794e+06	2.3711e+06	2.5207e+06	2.3976e+06	2.683e+06	1.09353e+07	1.06092e+07	1.0229e+07	9.95736e+06	1.0142e+07	9.48768e+06	1.50984e+07	1.63417e+07	1.54109e+07	1.36103e+07	1.56313e+07	1.32456e+07	1.26202e+07	1.17179e+07	1.32478e+07	1.17714e+07	1.24071e+07	1.21932e+07	2.04189e+06	2.20599e+06	1.8316e+06	2.39639e+06	1.87812e+06	2.5445e+06	8.15324e+06	1.06092e+07	8.50728e+06	9.98073e+06	8.70295e+06	9.58018e+06	8.07937e+06	9.49252e+06	8.69116e+06	9.37454e+06	8.83337e+06
P27659	2	2	97.28	0	6.39582	Condition 1	Condition 2	60S ribosomal protein L3 OS=Mus musculus GN=Rpl3 PE=1 SV=3	575795	479203	481481	431289	455652	404325	81076.7	77132.5	58613.7	71632.5	72983.6	80684.9	81323.2	69592.1	75295.7	72462.6	84280.7	60152.3	70424.4	72318.1	79278	71405.7	74367.7	78745.3	457633	428340	371928	410019	356927	383453	60450	77132.5	48748	71800.6	62628.2	81471.6	43517.2	40424.5	42463.8	49910.8	47627.8
P56135	3	3	181.2	0	2.25848	Condition 4	Condition 1	ATP synthase subunit f, mitochondrial OS=Mus musculus GN=Atp5j2 PE=1 SV=3	1.07856e+06	1.01274e+06	1.08928e+06	1.08553e+06	1.04698e+06	1.03261e+06	2.06063e+06	2.00279e+06	2.01428e+06	2.18126e+06	2.10137e+06	2.05104e+06	2.12707e+06	1.90471e+06	2.00626e+06	1.86122e+06	2.0191e+06	1.99664e+06	2.45782e+06	2.44401e+06	2.2812e+06	2.27306e+06	2.52059e+06	2.35496e+06	857223	905248	841436	1.032e+06	820132	979301	1.53638e+06	2.00279e+06	1.67524e+06	2.18638e+06	1.80321e+06	2.07104e+06	1.13823e+06	1.1064e+06	1.13145e+06	1.28197e+06	1.14101e+06
P67778	3	3	175.94	0	5.3929	Condition 4	Condition 1	Prohibitin OS=Mus musculus GN=Phb PE=1 SV=1	37395.9	38337.8	35526.4	36671.2	44277.4	35372.9	82205.6	74947.5	81149	70681.3	75057.9	82168.8	101549	93413.9	90736.4	114792	98385.7	98253.9	205853	182949	221677	188420	233156	195271	29721.7	34268.6	27443	34862.7	34684	33546.9	61291.7	74947.5	67490.2	70847.1	64408.2	82969.9	54340.6	54262.1	51171.7	79066.7	55598.6
Q9ESM3	3	3	108.96	0	6.73722	Condition 3	Condition 1	Hyaluro0n and proteoglycan link protein 2 OS=Mus musculus GN=Hapln2 PE=1 SV=1	16891.8	22713.1	21555.8	18893.5	16243.5	22835.3	48421.4	46625.7	46298.2	42534.5	52777	45674.9	122301	128299	125790	140969	160468	124799	122014	112460	121218	132633	120416	120723	13425.3	20302.3	16651.1	17961.7	12724	21656.5	36102.6	46625.7	38505.4	42634.4	45288.6	46120.2	65444.9	74525.8	70940.6	97096.7	90681.9
Q6GSS7	2	2	168.82	0	4.47514	Condition 3	Condition 1	Histone H2A type 2-A OS=Mus musculus GN=Hist2h2aa1 PE=1 SV=3	9.53379e+06	9.34746e+06	1.08065e+07	1.06047e+07	1.17556e+07	1.03999e+07	3.90341e+07	3.99509e+07	3.61022e+07	4.24463e+07	4.25399e+07	3.97961e+07	4.75462e+07	5.10624e+07	4.27423e+07	4.56665e+07	4.52336e+07	4.72126e+07	4.29216e+07	4.91608e+07	4.43235e+07	4.9999e+07	3.89721e+07	4.09598e+07	7.5773e+06	8.35531e+06	8.34769e+06	1.00818e+07	9.20854e+06	9.86305e+06	2.91035e+07	3.99509e+07	3.00255e+07	4.25459e+07	3.6504e+07	4.01841e+07	2.54427e+07	2.9661e+07	2.41049e+07	3.14542e+07	2.55619e+07
P35980	3	3	211.11	0	22.6777	Condition 1	Condition 3	60S ribosomal protein L18 OS=Mus musculus GN=Rpl18 PE=1 SV=3	285549	337616	293399	310760	304341	259634	15799.8	12867.1	17210.6	10579.2	10845.2	14364.3	13638.6	17121.2	13143.7	10417.9	10512.9	14155.2	20239.4	15757.2	19652.4	25226.1	17183.4	15488.6	226950	301781	226641	295434	238400	246231	11780.2	12867.1	14313.8	10604	9306.43	14504.4	7298.21	9945.34	7412.55	7175.63	5940.92
Q9DB20	13	13	1137.79	0	2.29692	Condition 4	Condition 1	ATP synthase subunit O, mitochondrial OS=Mus musculus GN=Atp5o PE=1 SV=1	1.95336e+06	2.21269e+06	2.1218e+06	2.21345e+06	2.19782e+06	2.30393e+06	4.45261e+06	4.59203e+06	4.48982e+06	4.52212e+06	4.42219e+06	4.12806e+06	4.2053e+06	4.01661e+06	4.02879e+06	4.2141e+06	4.24547e+06	3.7789e+06	4.89829e+06	5.01782e+06	4.91964e+06	4.85943e+06	5.07714e+06	5.09461e+06	1.5525e+06	1.97783e+06	1.63902e+06	2.10429e+06	1.72162e+06	2.185e+06	3.31983e+06	4.59203e+06	3.73411e+06	4.53273e+06	3.79474e+06	4.16831e+06	2.25032e+06	2.33316e+06	2.27208e+06	2.90259e+06	2.39915e+06
P10922	12	11	1030	0	5.77089	Condition 3	Condition 1	Histone H1.0 OS=Mus musculus GN=H1f0 PE=2 SV=4	5.87484e+06	6.07938e+06	5.90739e+06	6.054e+06	5.74806e+06	5.91406e+06	2.53873e+07	2.50767e+07	2.50056e+07	2.5582e+07	2.49688e+07	2.5092e+07	3.25442e+07	3.65034e+07	3.30839e+07	3.34316e+07	3.51363e+07	3.46158e+07	2.91741e+07	2.97871e+07	2.95239e+07	2.82341e+07	3.10845e+07	2.86684e+07	4.66923e+06	5.43411e+06	4.56326e+06	5.75544e+06	4.50264e+06	5.60877e+06	1.89285e+07	2.50767e+07	2.07967e+07	2.56421e+07	2.1426e+07	2.53366e+07	1.74149e+07	2.1204e+07	1.8658e+07	2.3027e+07	1.98558e+07
O88531	12	12	613.09	0	2.0417	Condition 4	Condition 1	Palmitoyl-protein thioesterase 1 OS=Mus musculus GN=Ppt1 PE=1 SV=2	1.61596e+06	1.56604e+06	1.50886e+06	1.52656e+06	1.48393e+06	1.60659e+06	1.55477e+06	1.6914e+06	1.61233e+06	1.57492e+06	1.6581e+06	1.55193e+06	2.89706e+06	2.98131e+06	2.59892e+06	2.66129e+06	2.62858e+06	2.65108e+06	3.19848e+06	3.09996e+06	3.16002e+06	3.11236e+06	3.07527e+06	3.35789e+06	1.28434e+06	1.39982e+06	1.16554e+06	1.45128e+06	1.16241e+06	1.52365e+06	1.15922e+06	1.6914e+06	1.34094e+06	1.57862e+06	1.42284e+06	1.56706e+06	1.55026e+06	1.73177e+06	1.46569e+06	1.83304e+06	1.48544e+06
O54962	3	3	184.46	0	2.42571	Condition 4	Condition 1	Barrier-to-autointegration factor OS=Mus musculus GN=Banf1 PE=1 SV=1	280116	235204	248263	263038	295654	273331	612754	545631	574684	615956	563971	560172	627808	554723	578870	547103	589465	573870	653004	618996	675575	622514	651985	648403	222632	210240	191775	250066	231596	259221	456864	545631	477954	617402	483951	565634	335949	322227	326460	376834	333112
Q8CCK0	11	11	1353.95	0	2.72524	Condition 4	Condition 1	Core histone macro-H2A.2 OS=Mus musculus GN=H2afy2 PE=1 SV=3	2.73046e+06	3.00612e+06	3.02085e+06	3.01485e+06	2.85724e+06	2.75778e+06	6.93263e+06	6.7659e+06	6.42008e+06	6.94101e+06	6.14954e+06	6.41245e+06	6.59416e+06	7.90751e+06	6.42401e+06	6.73392e+06	7.39752e+06	6.51947e+06	7.97517e+06	8.43377e+06	7.64462e+06	7.88686e+06	7.85178e+06	7.5924e+06	2.17012e+06	2.68705e+06	2.33351e+06	2.86617e+06	2.23817e+06	2.61542e+06	5.16891e+06	6.7659e+06	5.33946e+06	6.9573e+06	5.277e+06	6.47497e+06	3.52863e+06	4.5933e+06	3.62289e+06	4.6382e+06	4.18041e+06
P02301	15	13	1060.38	0	3.29328	Condition 3	Condition 1	Histone H3.3C OS=Mus musculus GN=H3f3c PE=3 SV=3	1.15508e+07	1.30323e+07	1.13632e+07	1.06682e+07	1.17017e+07	1.14188e+07	2.77079e+07	2.79382e+07	2.82677e+07	2.69442e+07	2.94704e+07	2.86839e+07	3.9163e+07	3.94522e+07	3.71883e+07	3.5733e+07	3.9014e+07	3.91068e+07	3.74023e+07	3.72077e+07	3.68976e+07	3.71086e+07	3.22909e+07	3.52548e+07	9.18043e+06	1.16491e+07	8.77769e+06	1.01421e+07	9.16635e+06	1.08293e+07	2.06587e+07	2.79382e+07	2.35097e+07	2.70075e+07	2.5289e+07	2.89636e+07	2.09567e+07	2.29169e+07	2.09727e+07	2.46122e+07	2.20472e+07
P48962	11	10	659.13	0	2.49668	Condition 4	Condition 1	ADP/ATP translocase 1 OS=Mus musculus GN=Slc25a4 PE=1 SV=4	918419	1.02131e+06	983610	1.01695e+06	920158	944251	1.51107e+06	1.58481e+06	1.51744e+06	1.51862e+06	1.61244e+06	1.60359e+06	1.71956e+06	1.95675e+06	1.81866e+06	1.97823e+06	1.70997e+06	1.82568e+06	2.46871e+06	2.51431e+06	2.14713e+06	2.48731e+06	2.36214e+06	2.51288e+06	729945	912911	759806	966798	720790	895508	1.12664e+06	1.58481e+06	1.26203e+06	1.52218e+06	1.38366e+06	1.61922e+06	920162	1.13663e+06	1.02566e+06	1.36257e+06	966320
P62806	15	15	1444.74	0	2.90005	Condition 4	Condition 1	Histone H4 OS=Mus musculus GN=Hist1h4a PE=1 SV=2	4.38105e+07	4.24503e+07	4.74694e+07	4.65778e+07	4.17219e+07	4.4421e+07	1.04115e+08	1.00965e+08	1.10738e+08	1.09262e+08	1.04509e+08	1.16197e+08	1.14651e+08	1.29591e+08	1.1051e+08	1.18217e+08	1.13723e+08	1.16783e+08	1.24072e+08	1.29521e+08	1.26863e+08	1.26973e+08	1.35494e+08	1.29798e+08	3.48199e+07	3.79446e+07	3.66685e+07	4.42808e+07	3.26821e+07	4.21279e+07	7.76271e+07	1.00965e+08	9.20988e+07	1.09519e+08	8.96802e+07	1.1733e+08	6.13514e+07	7.52766e+07	6.23235e+07	8.14257e+07	6.42656e+07
P14115	3	3	119.39	0	3.87532	Condition 1	Condition 3	60S ribosomal protein L27a OS=Mus musculus GN=Rpl27a PE=1 SV=5	411208	388056	437734	421149	393741	407331	123076	121049	120840	132455	111292	110585	98372.7	112965	105164	117647	95920.7	104517	111389	122167	106378	112902	127644	116523	326821	346868	338135	400379	308430	386304	91764.6	121049	100501	132765	95501.5	111664	52640.7	65618.9	59308.2	81032.7	54205.7
Q8K310	34	34	2995.71	0	2.2795	Condition 4	Condition 1	Matrin-3 OS=Mus musculus GN=Matr3 PE=1 SV=1	8.76792e+06	8.69997e+06	8.66589e+06	8.37919e+06	8.63954e+06	8.80157e+06	1.63627e+07	1.70995e+07	1.85161e+07	1.66133e+07	1.63097e+07	1.792e+07	1.85892e+07	1.8795e+07	1.71619e+07	1.75152e+07	1.76298e+07	1.75972e+07	1.95151e+07	1.90897e+07	1.92982e+07	1.91031e+07	2.22112e+07	1.92121e+07	6.96861e+06	7.77654e+06	6.69411e+06	7.96596e+06	6.76763e+06	8.34722e+06	1.21999e+07	1.70995e+07	1.53995e+07	1.66523e+07	1.39955e+07	1.80947e+07	9.94737e+06	1.09176e+07	9.67865e+06	1.20641e+07	9.96275e+06
P43274	13	12	1050.54	0	5.23654	Condition 3	Condition 1	Histone H1.4 OS=Mus musculus GN=Hist1h1e PE=1 SV=2	1.21117e+07	1.34481e+07	1.22087e+07	1.22319e+07	1.22788e+07	1.2834e+07	5.50554e+07	5.37559e+07	5.4713e+07	5.25157e+07	5.93562e+07	5.29419e+07	6.75544e+07	6.6707e+07	6.25478e+07	6.95214e+07	6.17928e+07	6.52099e+07	5.35723e+07	6.00788e+07	5.53975e+07	5.79379e+07	5.32024e+07	5.94949e+07	9.62619e+06	1.20207e+07	9.43082e+06	1.16286e+07	9.61842e+06	1.21715e+07	4.10488e+07	5.37559e+07	4.55038e+07	5.2639e+07	5.09344e+07	5.34581e+07	3.61493e+07	3.87486e+07	3.52745e+07	4.7885e+07	3.49197e+07
Q922P9	6	6	805.68	0	3.66629	Condition 4	Condition 1	Putative oxidoreductase GLYR1 OS=Mus musculus GN=Glyr1 PE=1 SV=1	484424	443531	457849	453670	475350	473250	1.70736e+06	1.53837e+06	1.57663e+06	1.5982e+06	1.51068e+06	1.50672e+06	1.53301e+06	1.56232e+06	1.49715e+06	1.60005e+06	1.37398e+06	1.48538e+06	1.63348e+06	1.7234e+06	1.59812e+06	1.67313e+06	1.73897e+06	1.85479e+06	385013	396454	353673	431297	372357	448821	1.27299e+06	1.53837e+06	1.31126e+06	1.60195e+06	1.29634e+06	1.52141e+06	820335	907515	844336	1.10209e+06	776450
Q64012	6	6	341.44	0	2.24175	Condition 2	Condition 1	R0-binding protein Raly OS=Mus musculus GN=Raly PE=1 SV=3	769179	784281	721114	672467	688900	727736	1.68826e+06	1.60483e+06	1.60055e+06	1.60176e+06	1.56859e+06	1.71827e+06	1.54652e+06	1.57774e+06	1.53028e+06	1.44106e+06	1.53041e+06	1.54309e+06	1.37479e+06	1.33998e+06	1.39638e+06	1.48606e+06	1.36772e+06	1.30986e+06	611332	701037	557037	639303	539638	690169	1.25875e+06	1.60483e+06	1.33115e+06	1.60552e+06	1.34603e+06	1.73502e+06	827567	916476	863016	992574	864851
Q9CXS4	6	6	413.34	0	11.5795	Condition 4	Condition 1	Centromere protein V OS=Mus musculus GN=Cenpv PE=1 SV=2	174610	213711	177091	196395	169411	169810	955204	998930	965489	988304	979732	1.02429e+06	1.41455e+06	1.53783e+06	1.46834e+06	1.47409e+06	1.49371e+06	1.41083e+06	2.22246e+06	2.0648e+06	2.28187e+06	2.00359e+06	2.10823e+06	2.06838e+06	138777	191028	136797	186709	132705	161044	712191	998930	802980	990623	840721	1.03427e+06	756946	893290	828085	1.01532e+06	844108
P28651	8	8	788.57	0	2.50008	Condition 2	Condition 1	Carbonic anhydrase-related protein OS=Mus musculus GN=Ca8 PE=1 SV=5	3.25564e+06	3.50082e+06	3.37348e+06	3.30685e+06	3.1177e+06	3.0715e+06	8.55551e+06	8.15543e+06	8.12465e+06	7.85361e+06	8.15799e+06	8.21925e+06	5.44914e+06	6.07704e+06	5.57854e+06	5.55743e+06	5.36567e+06	5.51199e+06	3.39566e+06	3.56208e+06	3.33985e+06	3.45981e+06	3.43803e+06	3.36197e+06	2.58753e+06	3.12924e+06	2.6059e+06	3.14376e+06	2.44219e+06	2.91294e+06	6.37891e+06	8.15543e+06	6.75713e+06	7.87205e+06	7.00048e+06	8.29939e+06	2.91591e+06	3.53002e+06	3.14608e+06	3.82785e+06	3.03219e+06
P0C0S6	5	5	547.88	0	3.68089	Condition 2	Condition 1	Histone H2A.Z OS=Mus musculus GN=H2afz PE=1 SV=2	7.16339e+06	7.39177e+06	6.82328e+06	7.36353e+06	6.88746e+06	7.13685e+06	2.74849e+07	2.81435e+07	2.77901e+07	2.02049e+07	2.66332e+07	2.71614e+07	2.14941e+07	1.95884e+07	1.93432e+07	2.14009e+07	2.06402e+07	2.21299e+07	2.23964e+07	2.3566e+07	2.17782e+07	2.32219e+07	1.98159e+07	2.33065e+07	5.69335e+06	6.6072e+06	5.27075e+06	7.00039e+06	5.39517e+06	6.76844e+06	2.04925e+07	2.81435e+07	2.31125e+07	2.02523e+07	2.28543e+07	2.74262e+07	1.15018e+07	1.13785e+07	1.09088e+07	1.47405e+07	1.16639e+07
P84099	6	5	314.78	0	3.44015	Condition 1	Condition 2	60S ribosomal protein L19 OS=Mus musculus GN=Rpl19 PE=1 SV=1	526186	568900	603897	597453	516986	585640	166872	168782	174215	162502	160182	155503	185603	223681	189138	202561	208793	198231	197350	176823	184476	229919	212963	223178	418205	508516	466490	567989	404972	555408	124418	168782	144892	162883	137454	157019	99318.8	129931	106667	139520	117991
Q80X32	1	1	38.86	0	6.78931	Condition 3	Condition 1	UPF0461 protein C5orf24 homolog OS=Mus musculus PE=2 SV=1	123100	103591	99819.1	97011.2	94870.6	83031.7	676723	703343	637729	754408	608877	684571	644971	740696	697230	718727	629695	651931	528036	592068	594348	563145	579434	560771	97837.7	92595.7	77106.9	92226.9	74315.2	78745.5	504558	703343	530388	756178	522486	691246	345133	430254	393210	495045	355846
Q9Z2D6	26	25	2431.18	0	3.08137	Condition 3	Condition 1	Methyl-CpG-binding protein 2 OS=Mus musculus GN=Mecp2 PE=1 SV=1	7.01403e+06	7.84765e+06	7.44416e+06	7.39654e+06	7.2921e+06	6.78792e+06	1.75004e+07	1.75035e+07	1.8493e+07	1.86108e+07	1.75183e+07	1.76016e+07	2.2036e+07	2.599e+07	2.19927e+07	2.1644e+07	2.19048e+07	2.13424e+07	2.06994e+07	2.08483e+07	2.12743e+07	2.01806e+07	2.06384e+07	2.02214e+07	5.57464e+06	7.0147e+06	5.75036e+06	7.03177e+06	5.71214e+06	6.43752e+06	1.30481e+07	1.75035e+07	1.53803e+07	1.86545e+07	1.50327e+07	1.77732e+07	1.17918e+07	1.5097e+07	1.2403e+07	1.4908e+07	1.23786e+07
P62242	7	7	460.98	0	2.87961	Condition 1	Condition 3	40S ribosomal protein S8 OS=Mus musculus GN=Rps8 PE=1 SV=2	2.02571e+06	2.19869e+06	1.99976e+06	2.02351e+06	2.10106e+06	1.98802e+06	780685	770137	731836	793127	761965	766156	755746	766165	622864	684822	736767	717813	736485	828676	757889	800524	681856	740879	1.61e+06	1.96532e+06	1.54475e+06	1.92372e+06	1.64583e+06	1.8854e+06	582072	770137	608655	794988	653853	773626	404411	445048	351270	471692	416353
Q06185	7	7	349.49	0	2.6565	Condition 4	Condition 1	ATP synthase subunit e, mitochondrial OS=Mus musculus GN=Atp5i PE=1 SV=2	976845	1.09677e+06	959639	1.07986e+06	1.03146e+06	1.01121e+06	2.23059e+06	2.27062e+06	2.07628e+06	2.40495e+06	2.13764e+06	2.24355e+06	2.47434e+06	2.56592e+06	2.18113e+06	2.22097e+06	2.21285e+06	2.23526e+06	2.70205e+06	2.8242e+06	2.77504e+06	2.82522e+06	2.49431e+06	2.73206e+06	776381	980360	741289	1.02661e+06	807979	959015	1.66311e+06	2.27062e+06	1.72681e+06	2.41059e+06	1.83434e+06	2.26543e+06	1.32406e+06	1.49049e+06	1.23007e+06	1.52976e+06	1.2505e+06
P00405	5	5	352.74	0	4.04639	Condition 4	Condition 1	Cytochrome c oxidase subunit 2 OS=Mus musculus GN=Mtco2 PE=1 SV=1	449262	464630	455740	465574	446476	410188	1.17439e+06	1.07165e+06	1.19985e+06	1.3948e+06	1.1268e+06	1.19153e+06	1.18423e+06	1.05819e+06	1.06804e+06	1.15152e+06	1.1559e+06	1.07802e+06	1.79455e+06	1.69941e+06	1.84275e+06	1.86712e+06	1.96731e+06	1.72122e+06	357067	415314	352044	442613	349739	389014	875616	1.07165e+06	997893	1.39808e+06	966925	1.20314e+06	633700	614680	602334	793147	653207
P14131	7	6	484.62	0	2.77435	Condition 1	Condition 2	40S ribosomal protein S16 OS=Mus musculus GN=Rps16 PE=1 SV=4	1.5325e+06	1.56869e+06	1.53909e+06	1.53247e+06	1.46434e+06	1.50431e+06	538555	541401	551138	539433	590968	533475	631144	663186	531799	591150	614161	565551	628966	598304	616128	600104	614007	579349	1.21801e+06	1.40219e+06	1.1889e+06	1.4569e+06	1.14706e+06	1.42666e+06	401542	541401	458372	540699	507117	538676	337735	385230	299913	407173	347068
P56391	6	6	445.32	0	9.39599	Condition 2	Condition 1	Cytochrome c oxidase subunit 6B1 OS=Mus musculus GN=Cox6b1 PE=1 SV=2	1.1384e+06	1.07751e+06	1.12337e+06	1.0911e+06	1.00279e+06	1.05431e+06	1.02396e+07	1.00478e+07	1.05163e+07	9.73174e+06	1.04646e+07	9.95613e+06	3.61904e+06	3.44456e+06	3.39545e+06	3.53566e+06	3.47675e+06	3.38098e+06	5.30986e+06	4.94885e+06	4.77298e+06	4.98261e+06	4.93949e+06	4.77221e+06	904786	963142	867762	1.03729e+06	785516	999881	7.63456e+06	1.00478e+07	8.74626e+06	9.75458e+06	8.97984e+06	1.00532e+07	1.9366e+06	2.00087e+06	1.9149e+06	2.4353e+06	1.96474e+06
P15864	6	6	524.53	0	5.08814	Condition 3	Condition 1	Histone H1.2 OS=Mus musculus GN=Hist1h1c PE=1 SV=2	5.0514e+06	5.32572e+06	4.29596e+06	4.31008e+06	4.5131e+06	4.73398e+06	2.10658e+07	2.17292e+07	2.05952e+07	2.03238e+07	2.22809e+07	1.91975e+07	2.6169e+07	2.41255e+07	2.34958e+07	2.2308e+07	2.51375e+07	2.24037e+07	2.39249e+07	2.22218e+07	2.16939e+07	2.21358e+07	2.10517e+07	2.26504e+07	4.01478e+06	4.76044e+06	3.31849e+06	4.09752e+06	3.53526e+06	4.48961e+06	1.57064e+07	2.17292e+07	1.71286e+07	2.03715e+07	1.91195e+07	1.93847e+07	1.40034e+07	1.4014e+07	1.32507e+07	1.53653e+07	1.42054e+07
P43276	7	7	600.13	0	5.22033	Condition 2	Condition 1	Histone H1.5 OS=Mus musculus GN=Hist1h1b PE=1 SV=2	1.6629e+06	1.74559e+06	1.53477e+06	1.51375e+06	1.52682e+06	1.42261e+06	8.31526e+06	8.408e+06	8.30351e+06	8.07875e+06	8.71036e+06	7.28888e+06	6.32907e+06	5.51185e+06	6.08765e+06	5.62028e+06	6.04517e+06	5.35079e+06	5.01125e+06	4.56153e+06	5.13424e+06	5.30088e+06	4.45498e+06	5.05899e+06	1.32165e+06	1.56031e+06	1.18556e+06	1.43909e+06	1.19601e+06	1.34917e+06	6.19978e+06	8.408e+06	6.90588e+06	8.09771e+06	7.47448e+06	7.35994e+06	3.38678e+06	3.20171e+06	3.43319e+06	3.87114e+06	3.41618e+06
Q9Z277	9	9	378.2	0	3.39625	Condition 4	Condition 1	Tyrosine-protein ki0se BAZ1B OS=Mus musculus GN=Baz1b PE=1 SV=2	110702	109771	116938	112209	109916	106023	349352	333939	344406	350704	350743	344895	386613	328132	364737	294537	363972	385696	367113	388111	363202	382363	377247	382369	87983.9	98119.6	90330.7	106676	86100.9	100550	260473	333939	286437	351527	300977	348258	206882	190605	205697	202871	205684
Q9DB77	16	15	1161.39	0	3.17683	Condition 4	Condition 1	Cytochrome b-c1 complex subunit 2, mitochondrial OS=Mus musculus GN=Uqcrc2 PE=1 SV=1	506453	532922	542956	564536	566581	559585	1.21146e+06	1.08264e+06	1.27668e+06	1.18941e+06	1.10037e+06	1.12172e+06	1.2903e+06	1.42224e+06	1.24444e+06	1.10674e+06	1.19075e+06	1.16778e+06	1.63706e+06	1.74671e+06	1.71959e+06	1.7585e+06	1.77709e+06	1.75892e+06	402521	476357	419415	536695	443821	530698	903257	1.08264e+06	1.06179e+06	1.1922e+06	944244	1.13265e+06	690459	826147	701815	762301	672905
Q3V132	5	5	248.95	0	2.60373	Condition 4	Condition 1	ADP/ATP translocase 4 OS=Mus musculus GN=Slc25a31 PE=1 SV=1	540960	537864	541907	505132	562604	539501	915830	893508	923336	878550	864872	779609	1.02232e+06	1.07847e+06	1.09337e+06	1.01966e+06	1.07364e+06	1.01901e+06	1.44842e+06	1.3333e+06	1.41383e+06	1.32055e+06	1.52839e+06	1.36026e+06	429947	480775	418605	480220	440706	511652	682834	893508	767922	880612	742158	787210	547060	626457	616618	702325	606723
P43275	5	5	658.38	0	5.67923	Condition 4	Condition 1	Histone H1.1 OS=Mus musculus GN=Hist1h1a PE=1 SV=2	510546	579557	532218	562687	539111	499847	2.99164e+06	2.96541e+06	3.12529e+06	3.2641e+06	2.90025e+06	2.98555e+06	2.6002e+06	2.64048e+06	2.85919e+06	2.48915e+06	2.63168e+06	2.77531e+06	2.77924e+06	3.15645e+06	3.02112e+06	3.22674e+06	2.99268e+06	3.13341e+06	405774	518043	411121	534937	422303	474044	2.23054e+06	2.96541e+06	2.59925e+06	3.27176e+06	2.48874e+06	3.01466e+06	1.39141e+06	1.5338e+06	1.61247e+06	1.71448e+06	1.48719e+06
Q8CF93	1	1	46.43	0	3.03957	Condition 3	Condition 1	Polypeptide N-acetylgalactosaminyltransferase 13 OS=Mus musculus GN=Galnt13 PE=2 SV=1	1.25081e+06	1.24211e+06	1.20552e+06	1.17083e+06	1.1185e+06	1.135e+06	2.88034e+06	3.1922e+06	3.24445e+06	2.9297e+06	3.48428e+06	3.21755e+06	3.53031e+06	3.24171e+06	3.88038e+06	3.70022e+06	3.28934e+06	4.00821e+06	3.24039e+06	3.38927e+06	3.12096e+06	3.13643e+06	2.94632e+06	3.51341e+06	994126	1.11027e+06	931222	1.11309e+06	876155	1.07641e+06	2.14755e+06	3.1922e+06	2.69835e+06	2.93658e+06	2.98991e+06	3.24892e+06	1.88912e+06	1.88304e+06	2.18838e+06	2.54864e+06	1.85884e+06
E9PUL5	5	5	380.31	0	1.73226	Condition 1	Condition 4	Proline-rich transmembrane protein 2 OS=Mus musculus GN=Prrt2 PE=1 SV=1	2.82095e+06	2.89276e+06	3.00567e+06	2.90199e+06	2.7246e+06	2.81904e+06	2.09317e+06	1.8949e+06	2.10803e+06	2.03819e+06	2.15621e+06	1.99437e+06	1.93142e+06	2.00796e+06	1.97514e+06	2.02362e+06	2.04271e+06	1.95892e+06	1.65768e+06	1.67786e+06	1.6525e+06	1.625e+06	1.64168e+06	1.65431e+06	2.24205e+06	2.58572e+06	2.32178e+06	2.75887e+06	2.13426e+06	2.67352e+06	1.56065e+06	1.8949e+06	1.75321e+06	2.04297e+06	1.85027e+06	2.01382e+06	1.03353e+06	1.16638e+06	1.1139e+06	1.39383e+06	1.15436e+06
Q64459	1	1	67.68	0	4.07943	Condition 4	Condition 1	Cytochrome P450 3A11 OS=Mus musculus GN=Cyp3a11 PE=1 SV=1	3.4709e+06	3.63427e+06	3.17234e+06	3.43683e+06	3.4138e+06	3.48808e+06	1.09793e+07	1.19528e+07	1.19909e+07	1.12513e+07	1.27721e+07	1.28788e+07	1.45459e+07	1.30537e+07	1.2508e+07	1.34374e+07	1.32171e+07	1.38716e+07	1.35426e+07	1.51585e+07	1.33489e+07	1.51138e+07	1.1998e+07	1.49407e+07	2.75862e+06	3.24853e+06	2.45053e+06	3.26733e+06	2.67414e+06	3.30802e+06	8.18606e+06	1.19528e+07	9.97263e+06	1.12777e+07	1.09599e+07	1.30043e+07	7.7837e+06	7.58259e+06	7.05404e+06	9.2554e+06	7.46912e+06
Q5SS00	1	1	33.16	0	3.40765	Condition 3	Condition 1	DBF4-type zinc finger-containing protein 2 homolog OS=Mus musculus GN=Zdbf2 PE=2 SV=1	1.26368e+06	1.45777e+06	1.32129e+06	1.33215e+06	1.20507e+06	1.27346e+06	2.33482e+06	2.30641e+06	2.38137e+06	2.3141e+06	2.25836e+06	2.39189e+06	3.90009e+06	5.02911e+06	4.49629e+06	4.72518e+06	4.26854e+06	4.34248e+06	3.06315e+06	3.53654e+06	3.85709e+06	3.5964e+06	3.5398e+06	3.37764e+06	1.00435e+06	1.30304e+06	1.02065e+06	1.26645e+06	943973	1.20772e+06	1.74082e+06	2.30641e+06	1.98055e+06	2.31953e+06	1.93793e+06	2.41521e+06	2.087e+06	2.9213e+06	2.53573e+06	3.25461e+06	2.41219e+06
Q8BYP3	1	1	32.63	0	10.8377	Condition 4	Condition 1	Rho-related GTP-binding protein RhoF OS=Mus musculus GN=Rhof PE=1 SV=1	15145.8	16551.7	21699.8	20063.3	17471.6	16334.5	155773	134923	119083	116255	119182	118409	138002	166976	137764	142206	125867	148873	172684	176963	186330	197216	224239	205089	12037.7	14794.9	16762.4	19073.8	13686.1	15491.3	116143	134923	99039.4	116528	102272	119564	73846.7	96992.6	77693.5	97948.9	71128.8
P0DN34	1	1	38.06	0	6.06447	Condition 4	Condition 1	0DH dehydroge0se [ubiquinone] 1 beta subcomplex subunit 1 OS=Mus musculus GN=Ndufb1 PE=3 SV=1	29902.7	36525.1	31354.2	28631.2	32751.1	28185.9	96948.8	95211.7	99726.2	116596	117710	100997	124043	113064	122957	111208	122368	131224	205736	184262	194409	182827	196453	172494	23766.2	32648.3	24220	27219.2	25655	26730.9	72284.1	95211.7	82940.5	116869	101009	101982	66377.3	65676.5	69342.8	76598	69151.1
Q9Z1X4	17	17	1339.08	0	2.49274	Condition 4	Condition 1	Interleukin enhancer-binding factor 3 OS=Mus musculus GN=Ilf3 PE=1 SV=2	2.19044e+06	2.1667e+06	2.14696e+06	2.32815e+06	2.33458e+06	2.222e+06	4.66768e+06	4.6006e+06	4.55198e+06	5.17105e+06	4.71563e+06	4.73301e+06	4.97941e+06	6.11117e+06	4.96875e+06	4.98974e+06	5.12457e+06	5.39886e+06	5.40746e+06	5.69275e+06	5.34506e+06	5.48133e+06	5.89211e+06	5.55617e+06	1.74093e+06	1.93673e+06	1.65845e+06	2.21333e+06	1.82875e+06	2.1073e+06	3.48018e+06	4.6006e+06	3.7858e+06	5.18318e+06	4.04654e+06	4.77916e+06	2.66456e+06	3.54984e+06	2.80218e+06	3.43684e+06	2.89594e+06
P56480	29	29	3327.55	0	2.3434	Condition 2	Condition 1	ATP synthase subunit beta, mitochondrial OS=Mus musculus GN=Atp5b PE=1 SV=2	1.85931e+07	1.80757e+07	1.93436e+07	1.91774e+07	1.87793e+07	1.76617e+07	4.38234e+07	4.35148e+07	4.30716e+07	4.43349e+07	4.13368e+07	4.55134e+07	3.44925e+07	3.58922e+07	3.16409e+07	3.13335e+07	3.74827e+07	3.16843e+07	3.96936e+07	4.1075e+07	3.99136e+07	4.12742e+07	3.97213e+07	3.88388e+07	1.47775e+07	1.61571e+07	1.49423e+07	1.82316e+07	1.47105e+07	1.675e+07	3.26743e+07	4.35148e+07	3.58218e+07	4.4439e+07	3.54717e+07	4.59572e+07	1.84574e+07	2.0849e+07	1.78442e+07	2.15819e+07	2.11818e+07
Q8VEM8	7	7	495.44	1.11022e-16	2.87673	Condition 4	Condition 1	Phosphate carrier protein, mitochondrial OS=Mus musculus GN=Slc25a3 PE=1 SV=1	810014	819615	708404	719410	722006	708951	1.20913e+06	1.23364e+06	1.23797e+06	1.24207e+06	1.29101e+06	1.25588e+06	1.52576e+06	1.39573e+06	1.50706e+06	1.38392e+06	1.57886e+06	1.39824e+06	2.36439e+06	1.99315e+06	2.3811e+06	2.16884e+06	1.97667e+06	2.02777e+06	643786	732620	547218	683931	565571	672354	901518	1.23364e+06	1.0296e+06	1.24498e+06	1.10784e+06	1.26812e+06	816458	810747	849921	953214	892230
Q80WS3	9	9	588.21	1.11022e-16	2.03818	Condition 3	Condition 1	rR0/tR0 2'-O-methyltransferase fibrillarin-like protein 1 OS=Mus musculus GN=Fbll1 PE=1 SV=1	771013	835844	793195	898709	762618	753991	1.12438e+06	1.17562e+06	1.17571e+06	1.20055e+06	1.21765e+06	1.11411e+06	1.55535e+06	1.73646e+06	1.56311e+06	1.62385e+06	1.64625e+06	1.68958e+06	1.54785e+06	1.60139e+06	1.62795e+06	1.65181e+06	1.52781e+06	1.61756e+06	612789	747127	612717	854388	597384	715069	838329	1.17562e+06	977813	1.20337e+06	1.04488e+06	1.12497e+06	832290	1.00867e+06	881533	1.11848e+06	930312
O89086	8	8	678.69	1.11022e-16	1.89508	Condition 3	Condition 1	R0-binding protein 3 OS=Mus musculus GN=Rbm3 PE=1 SV=1	3.4506e+06	3.33618e+06	3.6131e+06	3.69957e+06	3.48887e+06	3.71337e+06	5.87466e+06	5.77911e+06	5.67678e+06	5.95607e+06	5.36636e+06	5.72321e+06	6.80069e+06	7.25738e+06	6.82876e+06	6.6276e+06	6.67281e+06	6.18127e+06	5.53076e+06	5.64412e+06	5.78555e+06	5.65197e+06	5.39666e+06	5.59213e+06	2.74248e+06	2.98208e+06	2.791e+06	3.51712e+06	2.73295e+06	3.52168e+06	4.3801e+06	5.77911e+06	4.72128e+06	5.97005e+06	4.60494e+06	5.77901e+06	3.63915e+06	4.21565e+06	3.85115e+06	4.56497e+06	3.77087e+06
P63044	5	5	847.93	1.11022e-16	1.82836	Condition 4	Condition 2	Vesicle-associated membrane protein 2 OS=Mus musculus GN=Vamp2 PE=1 SV=2	1.36276e+07	1.28582e+07	1.3562e+07	1.39291e+07	1.24465e+07	1.35538e+07	8.01927e+06	8.23948e+06	7.81168e+06	7.9655e+06	7.37233e+06	8.28389e+06	9.82111e+06	1.07593e+07	9.58556e+06	9.64164e+06	9.95545e+06	9.52401e+06	1.40104e+07	1.46499e+07	1.46718e+07	1.46285e+07	1.46944e+07	1.45435e+07	1.0831e+07	1.14934e+07	1.04762e+07	1.32422e+07	9.74974e+06	1.28542e+07	5.9791e+06	8.23948e+06	6.49684e+06	7.9842e+06	6.32629e+06	8.36466e+06	5.25542e+06	6.24982e+06	5.40588e+06	6.64097e+06	5.62591e+06
P97450	5	5	289.37	1.11022e-16	2.23212	Condition 4	Condition 1	ATP synthase-coupling factor 6, mitochondrial OS=Mus musculus GN=Atp5j PE=1 SV=1	991526	1.05654e+06	984059	981472	997244	982924	1.62656e+06	1.51704e+06	1.53707e+06	1.52745e+06	1.43418e+06	1.47765e+06	2.07061e+06	2.42159e+06	1.98117e+06	1.98126e+06	2.00427e+06	2.01189e+06	2.35214e+06	2.2826e+06	2.08139e+06	2.16792e+06	2.28126e+06	2.21348e+06	788050	944396	760153	933069	781174	932184	1.21275e+06	1.51704e+06	1.27835e+06	1.53104e+06	1.23069e+06	1.49205e+06	1.10801e+06	1.40665e+06	1.1173e+06	1.36466e+06	1.13263e+06
Q8CH25	6	6	518.81	1.11022e-16	2.25243	Condition 3	Condition 1	SAFB-like transcription modulator OS=Mus musculus GN=Sltm PE=1 SV=1	213685	226728	198542	209257	201895	202495	316210	353929	374756	337083	367502	354191	450859	436147	474859	492399	504217	462915	424228	437626	413357	457640	419803	456607	169834	202663	153367	198937	158151	192042	235763	353929	311678	337875	315358	357644	241261	253348	267802	339155	284938
Q03265	37	34	3591.2	1.11022e-16	2.09185	Condition 4	Condition 1	ATP synthase subunit alpha, mitochondrial OS=Mus musculus GN=Atp5a1 PE=1 SV=1	1.20772e+07	1.19618e+07	1.20031e+07	1.19074e+07	1.12813e+07	1.09467e+07	2.21238e+07	2.12332e+07	1.9642e+07	2.21415e+07	2.04728e+07	2.1428e+07	2.00411e+07	2.17202e+07	1.93057e+07	1.96579e+07	2.09936e+07	1.83385e+07	2.47476e+07	2.40764e+07	2.40303e+07	2.43298e+07	2.56167e+07	2.39997e+07	9.59878e+06	1.06921e+07	9.272e+06	1.13202e+07	8.83699e+06	1.03816e+07	1.64953e+07	2.12332e+07	1.63359e+07	2.21935e+07	1.7568e+07	2.1637e+07	1.07243e+07	1.26168e+07	1.08876e+07	1.354e+07	1.18636e+07
Q8VEK3	38	38	3373.94	1.11022e-16	1.89063	Condition 3	Condition 1	Heterogeneous nuclear ribonucleoprotein U OS=Mus musculus GN=Hnrnpu PE=1 SV=1	1.70715e+07	1.68191e+07	1.65479e+07	1.77905e+07	1.69024e+07	1.65816e+07	3.03401e+07	2.8052e+07	2.7934e+07	2.89742e+07	2.67647e+07	2.83326e+07	3.32561e+07	3.46595e+07	3.05344e+07	3.0404e+07	3.27679e+07	3.06802e+07	2.97449e+07	2.89e+07	3.09833e+07	2.89631e+07	3.02684e+07	2.81121e+07	1.35682e+07	1.50339e+07	1.27827e+07	1.69132e+07	1.32402e+07	1.57257e+07	2.26213e+07	2.8052e+07	2.32322e+07	2.90422e+07	2.29672e+07	2.86088e+07	1.77958e+07	2.01329e+07	1.72202e+07	2.09417e+07	1.85174e+07
P70372	18	16	1886.67	1.11022e-16	2.13402	Condition 3	Condition 1	ELAV-like protein 1 OS=Mus musculus GN=Elavl1 PE=1 SV=2	4.38868e+06	4.48717e+06	4.19312e+06	4.4204e+06	4.16758e+06	4.1581e+06	9.28393e+06	9.13188e+06	8.23088e+06	8.86829e+06	8.30929e+06	8.72574e+06	8.90632e+06	1.07828e+07	8.52144e+06	9.22625e+06	8.89908e+06	8.75382e+06	8.7572e+06	9.18604e+06	9.15577e+06	9.21882e+06	9.25727e+06	9.20998e+06	3.48806e+06	4.0109e+06	3.23905e+06	4.2024e+06	3.2646e+06	3.94345e+06	6.92202e+06	9.13188e+06	6.84547e+06	8.88911e+06	7.13031e+06	8.81081e+06	4.7659e+06	6.26351e+06	4.80576e+06	6.35486e+06	5.02895e+06
Q60900	8	8	514.35	2.22045e-16	2.04244	Condition 2	Condition 1	ELAV-like protein 3 OS=Mus musculus GN=Elavl3 PE=1 SV=1	949346	1.03895e+06	954798	966174	997998	971486	2.00736e+06	1.91798e+06	1.88266e+06	2.1785e+06	1.96218e+06	2.05831e+06	1.79218e+06	2.01559e+06	1.78344e+06	1.82401e+06	1.69507e+06	1.88788e+06	1.84215e+06	1.98313e+06	1.8499e+06	2.02099e+06	1.78146e+06	1.94177e+06	754525	928677	737549	918525	781764	921337	1.49667e+06	1.91798e+06	1.56577e+06	2.18361e+06	1.68377e+06	2.07838e+06	959021	1.17081e+06	1.00579e+06	1.25634e+06	957899
Q64522	9	8	901.95	2.22045e-16	3.39623	Condition 4	Condition 1	Histone H2A type 2-B OS=Mus musculus GN=Hist2h2ab PE=1 SV=3	5.07798e+07	5.28819e+07	4.21761e+07	4.89193e+07	4.70559e+07	4.92899e+07	1.58507e+08	1.67068e+08	1.59616e+08	1.61398e+08	1.57451e+08	1.64168e+08	1.12865e+08	1.42503e+08	1.69165e+08	1.57928e+08	1.35076e+08	1.24242e+08	1.63142e+08	1.63165e+08	1.61821e+08	1.71634e+08	1.66201e+08	1.62689e+08	4.0359e+07	4.7269e+07	3.25797e+07	4.65067e+07	3.68604e+07	4.67455e+07	1.18181e+08	1.67068e+08	1.3275e+08	1.61777e+08	1.35111e+08	1.65768e+08	6.03959e+07	8.27768e+07	9.54024e+07	1.08778e+08	7.63325e+07
P56382	3	2	129.72	2.22045e-16	3.05411	Condition 2	Condition 1	ATP synthase subunit epsilon, mitochondrial OS=Mus musculus GN=Atp5e PE=1 SV=2	212740	268587	250804	231503	252121	217883	710329	728297	766813	665903	766384	740766	572298	547033	567046	573972	582499	528754	537462	655246	572250	657673	555333	663666	169082	240079	193737	220086	197495	206636	529615	728297	637745	667466	657644	747989	306245	317760	319791	395341	329176
Q9WV02	10	10	1092.7	2.22045e-16	2.35021	Condition 3	Condition 1	R0-binding motif protein, X chromosome OS=Mus musculus GN=Rbmx PE=1 SV=1	1.7183e+06	1.68181e+06	1.59688e+06	1.61905e+06	1.73853e+06	1.59453e+06	3.35459e+06	3.48392e+06	3.25575e+06	3.282e+06	3.44577e+06	3.71711e+06	3.79747e+06	4.70506e+06	3.5539e+06	3.84513e+06	3.70897e+06	3.77196e+06	3.58897e+06	3.57345e+06	3.43228e+06	3.60143e+06	3.61366e+06	3.52687e+06	1.36568e+06	1.5033e+06	1.23354e+06	1.53921e+06	1.36185e+06	1.51222e+06	2.50115e+06	3.48392e+06	2.70775e+06	3.28971e+06	2.95686e+06	3.75335e+06	2.03208e+06	2.73307e+06	2.00426e+06	2.64845e+06	2.09598e+06
Q6A0A9	13	11	581.45	3.33067e-16	1.64245	Condition 3	Condition 1	Constitutive coactivator of PPAR-gamma-like protein 1 OS=Mus musculus GN=FAM120A PE=1 SV=2	558961	560232	554622	558387	564602	505998	948090	916912	867828	856140	900586	914882	890408	856233	959498	867301	930931	920323	863309	865775	864997	857194	859216	828747	444254	500769	428427	530849	442271	479878	706887	916912	721757	858149	772805	923802	476471	497367	541119	597380	526078
Q920B9	7	7	461.33	3.33067e-16	2.05742	Condition 3	Condition 1	FACT complex subunit SPT16 OS=Mus musculus GN=Supt16h PE=1 SV=2	448173	426709	433964	387153	398396	418452	727744	740266	664090	703062	738176	707890	884195	885069	797045	876755	827118	899804	797139	752740	803323	794306	731391	715079	356201	381417	335223	368060	312076	396851	542599	740266	552312	704712	633439	714792	473146	514117	449502	603892	467412
Q920Q6	4	4	273.28	4.44089e-16	2.09478	Condition 2	Condition 1	R0-binding protein Musashi homolog 2 OS=Mus musculus GN=Msi2 PE=1 SV=1	538983	494615	576191	542441	624931	561182	1.14301e+06	1.16488e+06	1.14063e+06	1.09084e+06	1.19986e+06	1.25385e+06	1.19916e+06	1.09491e+06	1.09339e+06	1.03822e+06	1.15319e+06	1.08196e+06	1.13188e+06	1.13294e+06	1.08279e+06	1.11803e+06	1.19414e+06	1.16082e+06	428375	442117	445088	515690	489529	532213	852217	1.16488e+06	948644	1.0934e+06	1.02962e+06	1.26608e+06	641690	636010	616632	715105	651679
P62301	7	7	425.8	4.44089e-16	2.25266	Condition 1	Condition 3	40S ribosomal protein S13 OS=Mus musculus GN=Rps13 PE=1 SV=2	1.13932e+06	1.26184e+06	1.13862e+06	1.13961e+06	1.12191e+06	1.09132e+06	568960	521152	521952	521119	500432	430254	493150	528437	509704	499881	518570	510031	567271	580482	635231	550157	560424	554281	905516	1.12791e+06	879547	1.08341e+06	878830	1.03498e+06	424211	521152	434098	522342	429427	434449	263892	306958	287453	344308	293049
P63163	4	4	323.27	4.44089e-16	1.62737	Condition 3	Condition 1	Small nuclear ribonucleoprotein-associated protein N OS=Mus musculus GN=Snrpn PE=1 SV=1	691913	701204	747391	741402	704208	708492	1.04924e+06	1.04205e+06	1.04132e+06	1.03899e+06	1.05236e+06	1.02805e+06	1.15295e+06	1.27052e+06	1.17013e+06	1.15065e+06	1.12943e+06	1.11524e+06	1.03641e+06	1.10304e+06	1.14394e+06	1.14152e+06	1.09724e+06	1.08655e+06	549922	626777	577334	704838	551629	671919	782302	1.04205e+06	866051	1.04143e+06	903043	1.03807e+06	616960	738019	659907	792544	638252
P11103	8	8	470.66	5.55112e-16	1.82564	Condition 3	Condition 1	Poly [ADP-ribose] polymerase 1 OS=Mus musculus GN=Parp1 PE=1 SV=3	484187	518954	498163	501165	456438	477165	842554	851505	781142	828754	865882	817743	882150	929688	876875	900744	903480	867275	878227	773269	893446	847120	842721	778254	384824	463872	384814	476449	357543	452533	628200	851505	649662	830699	743025	825716	472052	540035	494523	620415	510565
Q9CRB2	4	4	254.6	5.55112e-16	3.2545	Condition 3	Condition 1	H/ACA ribonucleoprotein complex subunit 2 OS=Mus musculus GN=Nhp2 PE=1 SV=1	99247	94989.4	110832	87695.8	87005.8	103559	201564	208200	185993	193399	230778	235061	329529	366665	314203	290158	290454	307437	303381	283653	292119	311743	302202	271992	78879.9	84907.2	85613.8	83371	68154.5	98213.4	150284	208200	154687	193853	198034	237352	176336	212988	177198	199855	164138
Q9DCJ5	2	2	178.75	5.55112e-16	3.24791	Condition 4	Condition 1	0DH dehydroge0se [ubiquinone] 1 alpha subcomplex subunit 8 OS=Mus musculus GN=Ndufa8 PE=1 SV=3	212704	234196	238892	215831	245497	226598	410446	527783	464328	537108	482960	593539	537463	549178	516684	500952	476898	542872	769103	743577	706078	761841	727525	753592	169053	209338	184536	205187	192306	214901	306024	527783	386173	538369	414434	599326	287605	319006	291389	345046	269499
P17665	1	1	59.02	6.66134e-16	4.41012	Condition 4	Condition 1	Cytochrome c oxidase subunit 7C, mitochondrial OS=Mus musculus GN=Cox7c PE=1 SV=1	43811.2	55891.3	38785.4	49192.2	49129.5	49503.7	134887	156690	160698	151062	149353	156904	129466	145679	165469	146721	135964	119210	245064	198993	217405	193196	217017	191004	34820.5	49959	29960.4	46766.2	38484.8	46948.2	100570	156690	133649	151416	128162	158434	69279	84621.9	93317.8	101058	76834.2
Q8BW75	2	2	101.68	7.77156e-16	4.455	Condition 4	Condition 1	Amine oxidase [flavin-containing] B OS=Mus musculus GN=Maob PE=1 SV=4	53225.4	56015.4	55688.3	56210.3	55624.7	75763.5	112231	101713	99300.4	95225.2	101505	98697.5	187185	174811	140812	143961	154981	176956	274679	301039	258637	244186	238169	253802	42302.8	50069.9	43017.3	53438.2	43572.6	71852.5	83678.2	101713	82586.4	95448.7	87102.7	99659.8	100165	101544	79412.3	99157.6	87581
Q91VR2	8	8	633.04	7.77156e-16	2.43718	Condition 4	Condition 1	ATP synthase subunit gamma, mitochondrial OS=Mus musculus GN=Atp5c1 PE=1 SV=1	1.26001e+06	1.28976e+06	1.23743e+06	1.32944e+06	1.18629e+06	1.34264e+06	2.73785e+06	2.9171e+06	2.81528e+06	2.59282e+06	2.58143e+06	2.68304e+06	2.59044e+06	3.24646e+06	2.50331e+06	2.51803e+06	2.50793e+06	2.5175e+06	3.23033e+06	3.07223e+06	3.16877e+06	3.18835e+06	2.93175e+06	3.04224e+06	1.00144e+06	1.15287e+06	955871	1.26388e+06	929259	1.27333e+06	2.04131e+06	2.9171e+06	2.34142e+06	2.59891e+06	2.21516e+06	2.70919e+06	1.38618e+06	1.8858e+06	1.41177e+06	1.73437e+06	1.41725e+06
P25976	10	10	554.83	8.88178e-16	2.04591	Condition 2	Condition 1	Nucleolar transcription factor 1 OS=Mus musculus GN=Ubtf PE=1 SV=1	369653	433919	366948	415929	412631	444571	837481	818918	869668	809205	829571	834645	790701	890841	772737	776778	853738	824544	788360	797899	783766	864489	802693	875103	293795	387863	283455	395417	323227	421622	624418	818918	723288	811104	711866	842782	423116	517470	435793	535030	482455
Q9CR57	2	2	123.3	8.88178e-16	14.2125	Condition 1	Condition 3	60S ribosomal protein L14 OS=Mus musculus GN=Rpl14 PE=1 SV=3	356005	346100	354215	339023	363215	339038	28367.3	36178.5	25390	34704	49199.2	39721.1	30744.7	20847.8	21681.3	29836.1	27426.6	17051.4	25097.1	28864.7	31442.1	28984.7	43704.2	23269	282947	309365	273619	322303	284519	321536	21150.4	36178.5	21116.4	34785.4	42218.5	40108.4	16451.9	12110	12227.4	20550.5	15499
Q9Z204	13	11	1161.54	9.99201e-16	2.30871	Condition 3	Condition 1	Heterogeneous nuclear ribonucleoproteins C1/C2 OS=Mus musculus GN=Hnrnpc PE=1 SV=1	7.65072e+06	7.92712e+06	7.96859e+06	7.98479e+06	7.84671e+06	7.6725e+06	1.68899e+07	1.54582e+07	1.59795e+07	1.70087e+07	1.70007e+07	1.69016e+07	1.77239e+07	2.24078e+07	1.66649e+07	1.6964e+07	1.73179e+07	1.75473e+07	1.77261e+07	1.7927e+07	1.74775e+07	1.65329e+07	1.92738e+07	1.72704e+07	6.08067e+06	7.08573e+06	6.15547e+06	7.59101e+06	6.14658e+06	7.27643e+06	1.25929e+07	1.54582e+07	1.32899e+07	1.70486e+07	1.45885e+07	1.70664e+07	9.48432e+06	1.30162e+07	9.39836e+06	1.16845e+07	9.78652e+06
P40630	11	9	860.81	9.99201e-16	2.07132	Condition 4	Condition 1	Transcription factor A, mitochondrial OS=Mus musculus GN=Tfam PE=1 SV=2	1.24952e+06	1.32551e+06	1.24408e+06	1.3509e+06	1.09504e+06	1.28523e+06	2.47151e+06	2.32396e+06	2.55285e+06	2.58021e+06	2.46844e+06	2.61815e+06	2.55862e+06	2.85836e+06	2.42159e+06	2.56854e+06	2.41769e+06	2.67081e+06	2.59678e+06	2.68134e+06	2.76725e+06	2.55212e+06	2.45541e+06	2.58614e+06	993103	1.18482e+06	961006	1.28428e+06	857784	1.21888e+06	1.84273e+06	2.32396e+06	2.12316e+06	2.58627e+06	2.1182e+06	2.64368e+06	1.36916e+06	1.66036e+06	1.36568e+06	1.76916e+06	1.36626e+06
P60202	8	8	491.89	1.11022e-15	1.7181	Condition 3	Condition 4	Myelin proteolipid protein OS=Mus musculus GN=Plp1 PE=1 SV=2	9.38776e+06	1.0814e+07	1.06294e+07	9.94214e+06	9.32694e+06	9.68532e+06	1.04125e+07	9.57179e+06	1.01767e+07	9.59406e+06	1.05052e+07	1.03395e+07	1.66095e+07	1.58802e+07	1.62727e+07	1.64459e+07	1.65111e+07	1.65473e+07	9.8368e+06	9.75277e+06	9.41822e+06	9.21398e+06	9.74505e+06	9.22805e+06	7.46124e+06	9.66618e+06	8.21083e+06	9.45182e+06	7.3061e+06	9.18535e+06	7.76348e+06	9.57179e+06	8.46382e+06	9.61658e+06	9.01466e+06	1.04403e+07	8.88799e+06	9.22445e+06	9.17714e+06	1.13276e+07	9.33059e+06
P19536	2	2	88.18	1.22125e-15	2.81398	Condition 2	Condition 1	Cytochrome c oxidase subunit 5B, mitochondrial OS=Mus musculus GN=Cox5b PE=1 SV=1	344028	423353	307008	340717	382592	347320	1.03389e+06	1.10342e+06	988980	970880	954324	984538	775851	753532	756030	812126	656218	717775	926564	977158	883979	955367	896658	843011	273428	378418	237153	323914	299697	329391	770856	1.10342e+06	822517	973159	818918	994138	415169	437710	426371	559377	370834
D3YXK2	16	15	838.02	1.33227e-15	1.92637	Condition 3	Condition 1	Scaffold attachment factor B1 OS=Mus musculus GN=Safb PE=1 SV=2	1.02226e+06	1.08643e+06	1.02007e+06	940365	1.01871e+06	971732	1.48027e+06	1.56738e+06	1.51133e+06	1.58569e+06	1.51991e+06	1.48806e+06	1.86356e+06	1.93128e+06	2.01771e+06	2.16033e+06	1.79331e+06	1.90681e+06	1.71564e+06	1.83993e+06	1.80565e+06	1.71836e+06	1.77089e+06	1.6679e+06	812479	971115	787968	893990	797990	921570	1.10367e+06	1.56738e+06	1.25695e+06	1.58942e+06	1.30426e+06	1.50257e+06	997219	1.12184e+06	1.13791e+06	1.48799e+06	1.01342e+06
Q8VHN7	1	1	24.12	1.44329e-15	3.8535	Condition 3	Condition 1	G-protein coupled receptor 98 OS=Mus musculus GN=Gpr98 PE=2 SV=1	118344	113889	136777	103776	129610	154968	464558	447905	427594	447724	414819	454766	439966	588827	436874	529382	477410	446040	462671	408886	486473	529884	430817	439224	94057.7	101801	105655	98658	101527	146969	346370	447905	355622	448775	355961	459200	235432	342037	246380	364628	269789
P35550	10	9	697.01	1.55431e-15	2.03383	Condition 3	Condition 1	rR0 2'-O-methyltransferase fibrillarin OS=Mus musculus GN=Fbl PE=1 SV=2	757195	808808	863633	870575	903069	833005	1.38781e+06	1.36602e+06	1.49754e+06	1.4406e+06	1.53324e+06	1.63719e+06	1.75476e+06	1.78683e+06	1.60992e+06	1.63342e+06	1.73167e+06	1.72633e+06	1.62061e+06	1.71871e+06	1.77773e+06	1.61506e+06	1.6812e+06	1.59549e+06	601806	722961	667128	827641	707403	790004	1.03474e+06	1.36602e+06	1.24548e+06	1.44398e+06	1.31569e+06	1.65315e+06	939000	1.03793e+06	907933	1.12507e+06	978584
Q60930	2	2	114.27	1.88738e-15	2.76476	Condition 4	Condition 1	Voltage-dependent anion-selective channel protein 2 OS=Mus musculus GN=Vdac2 PE=1 SV=2	236001	257939	260540	242632	203655	240724	383695	368114	340321	378923	365597	368341	485675	566265	489392	506535	437755	447047	679494	680737	606630	689554	648348	680606	187570	230561	201258	230666	159529	228298	286079	368114	283039	379812	313723	371932	259892	328931	275998	348891	247379
P20357	86	86	7125.24	2.33147e-15	1.45382	Condition 1	Condition 4	Microtubule-associated protein 2 OS=Mus musculus GN=Map2 PE=1 SV=2	1.23317e+07	1.21781e+07	1.16866e+07	1.1412e+07	1.16931e+07	1.17805e+07	9.15189e+06	8.8101e+06	9.00156e+06	9.18831e+06	9.31811e+06	9.19062e+06	8.94228e+06	8.88801e+06	8.44364e+06	8.22936e+06	8.51019e+06	8.25548e+06	8.2117e+06	8.50863e+06	8.15129e+06	8.09046e+06	8.03715e+06	7.89411e+06	9.80102e+06	1.08855e+07	9.0275e+06	1.08492e+07	9.1596e+06	1.11724e+07	6.82357e+06	8.8101e+06	7.48644e+06	9.20988e+06	7.99599e+06	9.28023e+06	4.78514e+06	5.16285e+06	4.76188e+06	5.66822e+06	4.80918e+06
Q04750	14	14	797.24	2.44249e-15	1.63065	Condition 3	Condition 1	D0 topoisomerase 1 OS=Mus musculus GN=Top1 PE=1 SV=2	925116	913811	914842	875455	874573	847775	1.25006e+06	1.1985e+06	1.17701e+06	1.23687e+06	1.21665e+06	1.2093e+06	1.44966e+06	1.6206e+06	1.40719e+06	1.34935e+06	1.45982e+06	1.43993e+06	1.40393e+06	1.40913e+06	1.40851e+06	1.42764e+06	1.38127e+06	1.37389e+06	735268	816819	706685	832280	685082	804012	932031	1.1985e+06	978898	1.23977e+06	1.04403e+06	1.22109e+06	775736	941369	793602	929406	824959
Q9CX86	15	12	1445.13	2.66454e-15	1.97198	Condition 4	Condition 1	Heterogeneous nuclear ribonucleoprotein A0 OS=Mus musculus GN=Hnrnpa0 PE=1 SV=1	8.68337e+06	9.26077e+06	9.27078e+06	9.25404e+06	9.32486e+06	9.62085e+06	1.89922e+07	1.83539e+07	1.76535e+07	1.78438e+07	1.69329e+07	1.70881e+07	1.91818e+07	2.01704e+07	1.59112e+07	1.70316e+07	1.79682e+07	1.64224e+07	1.86988e+07	1.72003e+07	1.81513e+07	1.88725e+07	1.8044e+07	1.83101e+07	6.90141e+06	8.27782e+06	7.16137e+06	8.79766e+06	7.30447e+06	9.12421e+06	1.41604e+07	1.83539e+07	1.46821e+07	1.78857e+07	1.45303e+07	1.72547e+07	1.02645e+07	1.17165e+07	8.97329e+06	1.1731e+07	1.0154e+07
P47911	3	3	128.87	2.9976e-15	12.7314	Condition 1	Condition 4	60S ribosomal protein L6 OS=Mus musculus GN=Rpl6 PE=1 SV=3	355368	375482	359366	362015	315521	386210	37031.8	35874.3	22391	34958.1	23823.8	30206.3	39516.6	36035.5	26069.2	19506.8	29967	25683.3	37932	24954.4	23539.4	37894.9	23410.3	21453.7	282441	335628	277598	344162	247158	366274	27610.6	35874.3	18622.2	35040.1	20443.6	30500.8	21145.9	20932.2	14702	13435.9	16934.6
Q99NB9	27	27	1771.75	3.55271e-15	1.71879	Condition 3	Condition 1	Splicing factor 3B subunit 1 OS=Mus musculus GN=Sf3b1 PE=1 SV=1	1.23359e+06	1.32811e+06	1.45801e+06	1.42472e+06	1.3007e+06	1.36822e+06	2.14002e+06	2.11604e+06	2.10367e+06	2.09718e+06	1.98252e+06	2.09472e+06	2.36673e+06	2.38343e+06	2.2343e+06	2.28563e+06	2.2882e+06	2.38683e+06	2.1007e+06	2.33346e+06	2.14974e+06	2.2561e+06	2.18544e+06	2.3595e+06	980439	1.18714e+06	1.12627e+06	1.35445e+06	1.01888e+06	1.29759e+06	1.59558e+06	2.11604e+06	1.74958e+06	2.1021e+06	1.70123e+06	2.11514e+06	1.26647e+06	1.38448e+06	1.26006e+06	1.5743e+06	1.29308e+06
Q8C854	26	24	1941.52	3.55271e-15	1.93109	Condition 4	Condition 1	Myelin expression factor 2 OS=Mus musculus GN=Myef2 PE=1 SV=1	2.55258e+06	2.26351e+06	2.55143e+06	2.45145e+06	2.34889e+06	2.27617e+06	4.34747e+06	3.91842e+06	4.21094e+06	4.43783e+06	4.24987e+06	4.10139e+06	4.51267e+06	3.81562e+06	4.43988e+06	4.48524e+06	4.22953e+06	4.52622e+06	4.61115e+06	4.86294e+06	4.68049e+06	4.40268e+06	4.83467e+06	4.50074e+06	2.02875e+06	2.02326e+06	1.97089e+06	2.33056e+06	1.83996e+06	2.15867e+06	3.24144e+06	3.91842e+06	3.50216e+06	4.44824e+06	3.64687e+06	4.14138e+06	2.4148e+06	2.21641e+06	2.50392e+06	3.08935e+06	2.39015e+06
P62960	1	1	52.14	3.77476e-15	2.33804	Condition 3	Condition 1	Nuclease-sensitive element-binding protein 1 OS=Mus musculus GN=Ybx1 PE=1 SV=3	620880	711426	691904	700206	673564	760795	1.54859e+06	1.5812e+06	1.68542e+06	1.44269e+06	1.51226e+06	1.40854e+06	1.57007e+06	1.70945e+06	1.76804e+06	1.61006e+06	1.49653e+06	1.56924e+06	1.50739e+06	1.39039e+06	1.60637e+06	1.3063e+06	1.42788e+06	1.32462e+06	493466	635915	534472	665674	527625	721521	1.15461e+06	1.5812e+06	1.40174e+06	1.44607e+06	1.29769e+06	1.42228e+06	840169	992982	997104	1.10898e+06	845704
P62305	2	2	113.91	3.77476e-15	1.63976	Condition 4	Condition 1	Small nuclear ribonucleoprotein E OS=Mus musculus GN=Snrpe PE=1 SV=1	2.08154e+06	1.9814e+06	2.13758e+06	2.11039e+06	2.00018e+06	2.0224e+06	3.26824e+06	3.06786e+06	3.23455e+06	3.10378e+06	3.31057e+06	3.2293e+06	3.43696e+06	3.26651e+06	3.24913e+06	3.37536e+06	3.41177e+06	3.28635e+06	3.36904e+06	3.27038e+06	3.35992e+06	3.34041e+06	3.78262e+06	3.10155e+06	1.65437e+06	1.77109e+06	1.65121e+06	2.00631e+06	1.56681e+06	1.918e+06	2.43677e+06	3.06786e+06	2.69012e+06	3.11107e+06	2.84085e+06	3.26078e+06	1.83917e+06	1.89744e+06	1.83238e+06	2.32488e+06	1.92802e+06
Q91WN1	2	2	60.27	4.66294e-15	6.14715	Condition 4	Condition 1	D0J homolog subfamily C member 9 OS=Mus musculus GN=D0jc9 PE=1 SV=2	20443.6	16440.9	13359.3	17658.7	23209.9	24241.5	69029.2	77576.2	60871.2	66018	73370.4	85450.7	102304	111980	94842.5	116665	119375	112116	132658	122421	122528	97433.7	127498	106559	16248.2	14695.9	10319.6	16787.8	18181.1	22990.1	51467.6	77576.2	50625.5	66172.9	62960.1	86283.8	54744.6	65046.8	53487.4	80356.5	67460
Q9CZX8	11	11	655.73	6.21725e-15	2.15506	Condition 1	Condition 4	40S ribosomal protein S19 OS=Mus musculus GN=Rps19 PE=1 SV=3	1.77827e+06	1.83004e+06	1.96122e+06	1.83078e+06	1.79555e+06	1.82122e+06	812602	831444	811606	883713	868478	960939	782988	950358	887339	857634	835227	981925	750123	889475	843012	917353	823409	888815	1.41334e+06	1.6358e+06	1.51498e+06	1.7405e+06	1.40651e+06	1.72721e+06	605869	831444	674998	885787	745253	970308	418989	552042	500424	590722	471994
P11881	55	53	3909.91	6.43929e-15	2.96795	Condition 2	Condition 4	Inositol 1,4,5-trisphosphate receptor type 1 OS=Mus musculus GN=Itpr1 PE=1 SV=2	1.73018e+06	1.7001e+06	1.4054e+06	1.3597e+06	1.99617e+06	2.00752e+06	4.85803e+06	5.02717e+06	4.91795e+06	5.16615e+06	4.75232e+06	4.83927e+06	2.82825e+06	3.23437e+06	2.97547e+06	2.98252e+06	2.86373e+06	2.98045e+06	1.7003e+06	1.61311e+06	1.58996e+06	1.54409e+06	1.77732e+06	1.73525e+06	1.37512e+06	1.51965e+06	1.08562e+06	1.29265e+06	1.56367e+06	1.90389e+06	3.6221e+06	5.02717e+06	4.09017e+06	5.17828e+06	4.07803e+06	4.88645e+06	1.51344e+06	1.87877e+06	1.67805e+06	2.0543e+06	1.61832e+06
Q80V86	1	1	33.25	6.66134e-15	2.77297	Condition 2	Condition 4	Integrator complex subunit 8 OS=Mus musculus GN=Ints8 PE=1 SV=1	78415.3	101424	82379.7	85412.9	79390.1	97082.2	238067	222276	206940	212660	217216	208793	137478	150038	150193	170943	150424	146772	91250.4	81965.9	68251.4	74130	78489.7	76870.1	62323.2	90658.5	63635.5	81200.6	62188.9	92070.7	177501	222276	172109	213159	186396	210829	73566.7	87153.9	84703.1	117742	85006
Q64521	23	22	1713.24	7.32747e-15	1.9416	Condition 4	Condition 1	Glycerol-3-phosphate dehydroge0se, mitochondrial OS=Mus musculus GN=Gpd2 PE=1 SV=2	2.50871e+06	2.61441e+06	2.76893e+06	2.58959e+06	2.38091e+06	2.43831e+06	3.48356e+06	3.59199e+06	3.73529e+06	3.7712e+06	3.50523e+06	3.97222e+06	4.12853e+06	4.2668e+06	3.98283e+06	4.23484e+06	4.23202e+06	4.42767e+06	4.57912e+06	5.14945e+06	4.71566e+06	4.98555e+06	5.37926e+06	4.89911e+06	1.99389e+06	2.33692e+06	2.13891e+06	2.46188e+06	1.86505e+06	2.31244e+06	2.59731e+06	3.59199e+06	3.10657e+06	3.78005e+06	3.00788e+06	4.01095e+06	2.20924e+06	2.47849e+06	2.24616e+06	2.91688e+06	2.39155e+06
Q99PG4	1	1	39.36	7.54952e-15	2.63641	Condition 4	Condition 1	Regulator of G-protein sig0ling 18 OS=Mus musculus GN=Rgs18 PE=1 SV=1	158600	163353	145752	166856	140965	137946	370356	354292	350625	381026	352761	380685	322886	381928	340844	310793	287314	379380	406782	396326	378392	429769	431464	365552	126053	146014	112588	158627	110422	130825	276134	354292	291608	381920	302709	384397	172781	221854	192223	214069	162364
Q60932	7	6	656.65	8.77076e-15	2.88035	Condition 4	Condition 1	Voltage-dependent anion-selective channel protein 1 OS=Mus musculus GN=Vdac1 PE=1 SV=3	782708	722328	684951	653024	598562	693223	1.31569e+06	1.29978e+06	1.24742e+06	1.17031e+06	1.40538e+06	1.43981e+06	1.61286e+06	1.72505e+06	1.4243e+06	1.31234e+06	1.48788e+06	1.42519e+06	1.9304e+06	2.01492e+06	2.14877e+06	1.92121e+06	2.01188e+06	1.8825e+06	622084	645659	529102	620819	468873	657438	980963	1.29978e+06	1.03745e+06	1.17306e+06	1.20598e+06	1.45385e+06	863066	1.00204e+06	803251	903911	840814
P35979	1	1	45.19	8.99281e-15	2.50043	Condition 1	Condition 4	60S ribosomal protein L12 OS=Mus musculus GN=Rpl12 PE=1 SV=2	667884	715972	602698	726777	631343	646635	258916	317234	293786	321108	311492	339214	355121	333181	321665	377621	385403	372133	277815	269932	254250	272023	251706	270522	530823	639978	465564	690934	494552	613254	193045	317234	244337	321862	267295	342521	190030	193538	181406	260098	217795
Q99PT1	8	8	746.14	9.21485e-15	1.63576	Condition 1	Condition 2	Rho GDP-dissociation inhibitor 1 OS=Mus musculus GN=Arhgdia PE=1 SV=3	4.10268e+06	4.05127e+06	4.2756e+06	4.07258e+06	4.14815e+06	4.28952e+06	2.6598e+06	2.56344e+06	2.46434e+06	2.57436e+06	2.35641e+06	2.62822e+06	3.21189e+06	3.26405e+06	3.10399e+06	3.23529e+06	2.95773e+06	2.9902e+06	3.34548e+06	3.30901e+06	3.45345e+06	3.17725e+06	3.24732e+06	3.22096e+06	3.26075e+06	3.62126e+06	3.30276e+06	3.87173e+06	3.24938e+06	4.06809e+06	1.98312e+06	2.56344e+06	2.04955e+06	2.5804e+06	2.02207e+06	2.65384e+06	1.71873e+06	1.89601e+06	1.75053e+06	2.22841e+06	1.67144e+06
Q8BH59	9	9	867.02	1.11022e-14	3.84897	Condition 4	Condition 1	Calcium-binding mitochondrial carrier protein Aralar1 OS=Mus musculus GN=Slc25a12 PE=1 SV=1	294504	290825	252513	260038	342509	326590	615441	780217	685956	613174	702886	609942	574561	475860	603147	596516	533300	540446	1.1106e+06	1.19176e+06	1.1076e+06	1.06271e+06	1.3178e+06	1.01058e+06	234067	259957	195058	247214	268298	309731	458867	780217	570497	614613	603156	615889	307456	276417	340151	410869	301373
Q8BG39	8	8	434.91	1.22125e-14	1.95232	Condition 1	Condition 2	Sy0ptic vesicle glycoprotein 2B OS=Mus musculus GN=Sv2b PE=1 SV=1	1.33246e+06	1.349e+06	1.24384e+06	1.31737e+06	1.23083e+06	1.27016e+06	642205	650470	643076	772168	641717	616747	778349	842624	760014	822581	778489	753464	1.06698e+06	992993	1.02828e+06	999013	1.05251e+06	954718	1.05902e+06	1.20581e+06	960822	1.2524e+06	964147	1.20459e+06	478822	650470	534835	773980	550665	622760	416506	489462	428618	566578	439931
P28235	1	1	24.77	1.29896e-14	2.96179	Condition 4	Condition 1	Gap junction alpha-4 protein OS=Mus musculus GN=Gja4 PE=1 SV=2	55503.4	48545.7	54824.6	58671.8	49158.8	43318.2	115119	101679	96984.4	99135.3	93322.5	97520.7	140156	137533	135634	117959	126615	141544	133102	157837	144990	162649	146920	172722	44113.2	43393	42350.2	55778.3	38507.7	41082	85831.4	101679	80660.2	99367.9	80081.3	98471.5	74999.7	79890	76492	81247.6	71551.2
P62852	3	2	163.59	1.39888e-14	2.07817	Condition 1	Condition 4	40S ribosomal protein S25 OS=Mus musculus GN=Rps25 PE=1 SV=1	1.12426e+06	1.38765e+06	1.2245e+06	1.24854e+06	1.1423e+06	1.2725e+06	623835	624818	648568	688386	663871	710541	593232	712799	654228	610223	570739	613099	588718	570052	584268	615352	589898	612411	893547	1.24036e+06	945882	1.18697e+06	894798	1.20681e+06	465125	624818	539403	690002	569676	717469	317447	414049	368959	420310	322530
Q8R1I1	2	2	110.32	1.59872e-14	3.3163	Condition 4	Condition 1	Cytochrome b-c1 complex subunit 9 OS=Mus musculus GN=Uqcr10 PE=1 SV=1	151696	185654	152130	183820	136323	137130	309000	347641	334129	381494	324762	386048	331329	397019	332288	385665	388289	392170	496406	526556	526903	497985	549630	542229	120565	165948	117515	174754	106786	130051	230388	347641	277889	382389	278683	389812	177299	230620	187397	265639	219426
P60824	5	5	561.92	1.76525e-14	2.22228	Condition 4	Condition 1	Cold-inducible R0-binding protein OS=Mus musculus GN=Cirbp PE=1 SV=1	1.11605e+06	1.10966e+06	1.18601e+06	1.06796e+06	1.07066e+06	1.0577e+06	1.80785e+06	1.79431e+06	1.83306e+06	1.80686e+06	1.80197e+06	1.84474e+06	2.49299e+06	1.76354e+06	2.19186e+06	2.13257e+06	2.23285e+06	2.09706e+06	2.2874e+06	2.40912e+06	2.6301e+06	2.41921e+06	2.52401e+06	2.41509e+06	887023	991878	916155	1.0153e+06	838684	1.0031e+06	1.34792e+06	1.79431e+06	1.52453e+06	1.8111e+06	1.54629e+06	1.86273e+06	1.33404e+06	1.0244e+06	1.23612e+06	1.46887e+06	1.26181e+06
P51881	4	4	260.31	2.83107e-14	2.59322	Condition 4	Condition 1	ADP/ATP translocase 2 OS=Mus musculus GN=Slc25a5 PE=1 SV=3	431935	495128	491034	501715	504752	516568	842934	840882	741598	759117	804144	773754	924279	968902	808387	1.01545e+06	765277	899798	1.37276e+06	1.14672e+06	1.222e+06	1.31422e+06	1.30851e+06	1.26281e+06	343295	442574	379307	476972	395389	489902	628484	840882	616774	760899	690046	781298	494595	562814	455898	699421	432465
Q9CWF2	2	2	287.09	2.90878e-14	2.21261	Condition 1	Condition 2	Tubulin beta-2B chain OS=Mus musculus GN=Tubb2b PE=1 SV=1	6.43133e+06	7.15952e+06	6.72904e+06	5.83613e+06	6.17832e+06	5.92493e+06	2.89227e+06	2.72055e+06	2.62847e+06	2.93117e+06	2.85666e+06	3.26233e+06	3.38589e+06	3.47259e+06	3.2925e+06	3.37488e+06	3.2758e+06	3.25955e+06	3.59321e+06	3.17662e+06	3.77623e+06	3.37794e+06	3.18914e+06	3.11156e+06	5.11152e+06	6.3996e+06	5.19796e+06	5.54832e+06	4.83968e+06	5.61908e+06	2.15645e+06	2.72055e+06	2.18605e+06	2.93805e+06	2.45133e+06	3.29414e+06	1.81184e+06	2.01715e+06	1.85684e+06	2.32455e+06	1.85119e+06
Q08091	6	6	318.02	2.91989e-14	2.80763	Condition 3	Condition 2	Calponin-1 OS=Mus musculus GN=Cnn1 PE=1 SV=1	343941	334884	352681	370501	379205	335119	289854	253393	291487	282257	279110	299776	861311	604696	845667	842126	839649	767948	431805	491016	487193	470710	433158	430234	273359	299339	272435	352229	297044	317820	216113	253393	242425	282919	239508	302699	460900	351255	476923	580040	474493
Q9D0T1	6	6	339.92	3.06422e-14	1.64067	Condition 3	Condition 1	NHP2-like protein 1 OS=Mus musculus GN=Snu13 PE=1 SV=4	1.17424e+06	1.27835e+06	1.1721e+06	1.36598e+06	1.24149e+06	1.27647e+06	1.42843e+06	1.57225e+06	1.57451e+06	1.64561e+06	1.55317e+06	1.57711e+06	2.04288e+06	2.14711e+06	1.99741e+06	2.08709e+06	1.92869e+06	2.11599e+06	1.91883e+06	1.98462e+06	1.9254e+06	1.95069e+06	1.90345e+06	2.01092e+06	933266	1.14266e+06	905411	1.29862e+06	972498	1.21058e+06	1.06502e+06	1.57225e+06	1.3095e+06	1.64947e+06	1.33279e+06	1.59249e+06	1.09317e+06	1.24721e+06	1.12646e+06	1.43755e+06	1.08992e+06
O88783	1	1	15.75	3.71925e-14	1.72729	Condition 2	Condition 1	Coagulation factor V OS=Mus musculus GN=F5 PE=1 SV=1	477261	513885	515383	518671	510735	534916	901999	870731	922375	860382	885683	863076	756797	760069	747056	772555	735337	735124	652316	688205	690482	786252	693071	770861	379319	459341	398116	493092	400075	507303	672522	870731	767123	862402	760016	871491	404973	441507	421310	532121	415546
P62267	3	3	153.23	4.10783e-14	1.56234	Condition 1	Condition 4	40S ribosomal protein S23 OS=Mus musculus GN=Rps23 PE=1 SV=3	378118	441871	376118	384203	375773	382494	257107	259857	256977	267826	259357	254899	251953	268572	243842	273445	260093	260973	237910	252514	251786	254325	246329	253980	300523	394971	290539	365256	294355	362749	191697	259857	213724	268454	222558	257384	134823	156008	137517	188343	146981
P97351	12	12	922.31	4.32987e-14	1.90479	Condition 1	Condition 2	40S ribosomal protein S3a OS=Mus musculus GN=Rps3a PE=1 SV=3	2.23888e+06	2.2014e+06	2.13544e+06	2.13942e+06	2.05625e+06	2.11148e+06	1.13131e+06	1.14065e+06	1.17889e+06	1.1171e+06	1.10575e+06	1.08969e+06	1.38153e+06	1.53218e+06	1.33602e+06	1.40157e+06	1.32666e+06	1.37789e+06	1.39807e+06	1.49871e+06	1.20001e+06	1.38209e+06	1.30107e+06	1.47716e+06	1.77942e+06	1.96774e+06	1.64955e+06	2.03391e+06	1.61073e+06	2.00248e+06	843495	1.14065e+06	980462	1.11972e+06	948855	1.10031e+06	739278	890009	753461	965372	749709
Q8K0G8	1	1	43.45	4.82947e-14	1.97	Condition 4	Condition 1	Epithelial splicing regulatory protein 2 OS=Mus musculus GN=Esrp2 PE=1 SV=1	579870	601356	609155	613921	587581	570120	1.09642e+06	1.04263e+06	959789	1.03207e+06	923001	988446	1.00397e+06	1.24675e+06	1.04607e+06	1.02163e+06	1.09722e+06	1.05574e+06	1.13486e+06	1.2516e+06	1.17449e+06	1.25295e+06	1.1155e+06	1.08776e+06	460872	537528	470552	583645	460271	540689	817484	1.04263e+06	798240	1.03449e+06	792039	998083	537240	724211	589940	703682	620048
P49312	17	14	2055.41	5.35127e-14	1.64264	Condition 4	Condition 1	Heterogeneous nuclear ribonucleoprotein A1 OS=Mus musculus GN=Hnrnpa1 PE=1 SV=2	2.12641e+07	2.28362e+07	2.30079e+07	2.23727e+07	2.13753e+07	2.19509e+07	3.29861e+07	3.11963e+07	3.27036e+07	3.09877e+07	3.24112e+07	3.1823e+07	3.56828e+07	4.05837e+07	3.30787e+07	3.37445e+07	3.46836e+07	3.32838e+07	3.58904e+07	3.68392e+07	3.60055e+07	3.60489e+07	3.76786e+07	3.56921e+07	1.69004e+07	2.04124e+07	1.77728e+07	2.12694e+07	1.6744e+07	2.08178e+07	2.45941e+07	3.11963e+07	2.7199e+07	3.10604e+07	2.78125e+07	3.21333e+07	1.90944e+07	2.35742e+07	1.86551e+07	2.32426e+07	1.96e+07
Q8VH51	3	3	255.56	5.56222e-14	1.55532	Condition 3	Condition 1	R0-binding protein 39 OS=Mus musculus GN=Rbm39 PE=1 SV=2	392188	439729	416894	403877	409506	413245	594635	561251	563594	540924	524840	570596	644407	674119	610135	643894	619518	658035	458697	480835	436936	449162	476536	468208	311705	393055	322037	383960	320779	391913	443354	561251	468731	542194	450372	576159	344831	391581	344092	443502	350095
Q9CYT6	16	16	1220.1	5.72875e-14	1.57544	Condition 1	Condition 3	Adenylyl cyclase-associated protein 2 OS=Mus musculus GN=Cap2 PE=1 SV=1	5.95927e+06	6.69607e+06	6.45122e+06	6.35154e+06	6.92419e+06	6.36173e+06	4.53337e+06	4.58851e+06	4.76024e+06	4.84502e+06	4.85609e+06	5.03957e+06	4.15513e+06	4.32689e+06	3.86197e+06	4.06118e+06	4.08123e+06	4.10613e+06	4.39365e+06	4.5666e+06	4.34913e+06	4.39242e+06	4.62332e+06	4.42483e+06	4.73633e+06	5.98534e+06	4.98335e+06	6.0383e+06	5.42394e+06	6.03333e+06	3.38004e+06	4.58851e+06	3.95901e+06	4.85639e+06	4.16708e+06	5.0887e+06	2.22347e+06	2.51339e+06	2.178e+06	2.79726e+06	2.30634e+06
Q9Z1G4	15	14	1115.18	5.79536e-14	1.7243	Condition 4	Condition 2	V-type proton ATPase 116 kDa subunit a isoform 1 OS=Mus musculus GN=Atp6v0a1 PE=1 SV=3	2.46155e+06	2.55662e+06	2.49968e+06	2.63099e+06	2.37876e+06	2.45943e+06	1.83388e+06	1.90623e+06	1.87939e+06	1.94262e+06	1.87816e+06	1.9765e+06	2.55166e+06	2.85966e+06	2.38402e+06	2.58025e+06	2.4346e+06	2.4751e+06	3.16093e+06	3.44493e+06	3.2564e+06	3.10184e+06	3.39619e+06	3.32569e+06	1.9564e+06	2.28525e+06	1.93092e+06	2.50123e+06	1.86336e+06	2.33247e+06	1.36733e+06	1.90623e+06	1.56306e+06	1.94718e+06	1.61167e+06	1.99577e+06	1.36543e+06	1.66112e+06	1.34449e+06	1.77723e+06	1.37581e+06
P62317	5	5	182.56	6.03961e-14	1.92981	Condition 3	Condition 1	Small nuclear ribonucleoprotein Sm D2 OS=Mus musculus GN=Snrpd2 PE=1 SV=1	277103	295507	270841	247963	255226	235113	383208	398349	378565	430377	413993	401936	471024	530326	524584	497829	537084	491643	480084	519931	453948	468143	497826	504131	220237	264141	209216	235734	199927	222977	285717	398349	314846	431387	355253	405855	252052	308055	295845	342895	303511
Q9DCT2	2	2	103.23	6.27276e-14	2.19581	Condition 4	Condition 1	0DH dehydroge0se [ubiquinone] iron-sulfur protein 3, mitochondrial OS=Mus musculus GN=Ndufs3 PE=1 SV=2	339976	333345	299248	331377	283743	316013	413371	478804	463273	482098	435473	469488	530248	591006	501050	512423	473179	479692	710608	685460	681358	741638	699646	661458	270208	297963	231159	315035	222265	299700	308205	478804	385296	483230	373685	474066	283743	343302	282573	352947	267398
P43024	2	2	79.78	7.16094e-14	3.85941	Condition 2	Condition 1	Cytochrome c oxidase subunit 6A1, mitochondrial OS=Mus musculus GN=Cox6a1 PE=1 SV=2	125130	136078	129237	122714	139318	139810	600627	515830	527146	510767	463777	439610	353396	246005	241369	234309	239167	215913	338026	440293	369960	362091	341029	379781	99451.1	121634	99831.1	116663	109132	132593	447822	515830	438418	511966	397973	443896	189107	142899	136123	161388	135155
A2RT62	5	5	268.97	7.30527e-14	1.91259	Condition 1	Condition 3	F-box/LRR-repeat protein 16 OS=Mus musculus GN=Fbxl16 PE=1 SV=1	817727	777814	735615	839180	756824	735301	544535	577442	595829	634646	558681	565597	415688	462683	392633	400564	399740	366463	471043	462852	473307	484319	447953	448591	649917	695256	568238	797794	592845	697344	406000	577442	495541	636136	479412	571112	222441	268763	221429	275901	225897
Q9JI46	3	3	191.25	7.40519e-14	1.98891	Condition 1	Condition 2	Diphosphoinositol polyphosphate phosphohydrolase 1 OS=Mus musculus GN=Nudt3 PE=1 SV=1	475617	516145	518804	496867	469115	452233	250102	256999	228495	257140	221356	258463	326617	344095	289328	310507	332820	308956	344021	346784	374933	339486	342573	361314	378013	461361	400759	472363	367473	428888	186474	256999	190035	257743	189948	260983	174777	199877	163170	213871	188080
Q6PDM2	10	10	723.86	7.81597e-14	1.35777	Condition 3	Condition 1	Serine/arginine-rich splicing factor 1 OS=Mus musculus GN=Srsf1 PE=1 SV=3	4.87223e+06	4.97832e+06	4.98511e+06	4.80111e+06	4.61873e+06	4.65874e+06	6.22646e+06	6.14838e+06	6.08688e+06	6.43613e+06	6.30818e+06	6.54922e+06	6.79114e+06	6.55298e+06	6.30852e+06	6.58139e+06	6.5494e+06	6.47538e+06	5.37795e+06	5.13328e+06	5.52871e+06	5.22727e+06	5.3309e+06	5.07903e+06	3.87237e+06	4.44991e+06	3.85083e+06	4.56434e+06	3.618e+06	4.41825e+06	4.64239e+06	6.14838e+06	5.06235e+06	6.45124e+06	5.41313e+06	6.61308e+06	3.63404e+06	3.80648e+06	3.55775e+06	4.53314e+06	3.70112e+06
Q9QZQ8	19	18	2003.67	7.86038e-14	3.67171	Condition 2	Condition 1	Core histone macro-H2A.1 OS=Mus musculus GN=H2afy PE=1 SV=3	1.05933e+07	1.02875e+07	1.09655e+07	1.17122e+07	9.56572e+06	1.16426e+07	3.3407e+07	3.36928e+07	3.51599e+07	4.36559e+07	3.72615e+07	5.46273e+07	3.26325e+07	4.23965e+07	2.98027e+07	3.29573e+07	3.10135e+07	3.23758e+07	3.65137e+07	3.76014e+07	3.54672e+07	3.83675e+07	4.13078e+07	3.65206e+07	8.41939e+06	9.19554e+06	8.47046e+06	1.11346e+07	7.49314e+06	1.10416e+07	2.4908e+07	3.36928e+07	2.92419e+07	4.37584e+07	3.19746e+07	5.51599e+07	1.74622e+07	2.46272e+07	1.68076e+07	2.27003e+07	1.7526e+07
P62897	14	14	1347.56	7.90479e-14	1.60833	Condition 2	Condition 1	Cytochrome c, somatic OS=Mus musculus GN=Cycs PE=1 SV=2	6.21013e+06	6.81021e+06	6.27913e+06	6.68861e+06	6.64354e+06	6.24244e+06	1.00133e+07	9.85932e+06	1.05545e+07	1.11146e+07	9.95613e+06	1.10245e+07	7.78465e+06	7.78352e+06	7.65206e+06	7.57229e+06	7.91137e+06	8.07481e+06	7.17084e+06	7.3191e+06	7.34479e+06	7.50064e+06	7.98226e+06	7.55454e+06	4.93571e+06	6.08737e+06	4.85042e+06	6.35875e+06	5.2041e+06	5.9202e+06	7.4658e+06	9.85932e+06	8.77797e+06	1.11407e+07	8.54349e+06	1.1132e+07	4.16568e+06	4.52128e+06	4.31546e+06	5.21564e+06	4.47079e+06
Q9CQ75	2	2	131.07	8.37108e-14	2.09113	Condition 4	Condition 1	0DH dehydroge0se [ubiquinone] 1 alpha subcomplex subunit 2 OS=Mus musculus GN=Ndufa2 PE=1 SV=3	365026	396021	341148	386630	297327	382374	597965	563716	547769	568575	571851	553261	631479	681542	645290	624079	659466	598353	772766	775470	701239	788360	765333	731511	290117	353987	263525	367563	232906	362635	445837	563716	455570	569909	490713	558655	337914	395893	363918	429853	372671
Q9R1T4	21	19	2004.59	9.52571e-14	1.39512	Condition 1	Condition 4	Septin-6 OS=Mus musculus GN=Sept6 PE=1 SV=4	2.03778e+07	2.08306e+07	2.10242e+07	1.98152e+07	1.92573e+07	1.96073e+07	1.89058e+07	1.84746e+07	2.03663e+07	1.84775e+07	1.89477e+07	2.02537e+07	1.55269e+07	1.59188e+07	1.53638e+07	1.61822e+07	1.54965e+07	1.62563e+07	1.42289e+07	1.42808e+07	1.43372e+07	1.48839e+07	1.4732e+07	1.42051e+07	1.61959e+07	1.86196e+07	1.62405e+07	1.8838e+07	1.50849e+07	1.85952e+07	1.4096e+07	1.84746e+07	1.69383e+07	1.85209e+07	1.62593e+07	2.04511e+07	8.30869e+06	9.24691e+06	8.66456e+06	1.1146e+07	8.75721e+06
Q3UHL1	18	17	1512.97	9.71445e-14	1.69121	Condition 4	Condition 2	CaM ki0se-like vesicle-associated protein OS=Mus musculus GN=Camkv PE=1 SV=2	4.03471e+06	4.19109e+06	4.001e+06	3.8116e+06	3.75135e+06	3.89282e+06	3.01618e+06	3.04744e+06	2.92858e+06	3.03366e+06	2.78287e+06	2.99342e+06	3.61898e+06	3.20669e+06	3.4338e+06	3.68944e+06	3.77022e+06	3.68836e+06	5.00991e+06	5.06836e+06	5.33325e+06	5.02732e+06	4.7463e+06	4.92207e+06	3.20672e+06	3.74624e+06	3.09064e+06	3.62363e+06	2.93855e+06	3.69187e+06	2.24884e+06	3.04744e+06	2.43565e+06	3.04078e+06	2.38802e+06	3.0226e+06	1.93657e+06	1.8627e+06	1.93653e+06	2.54122e+06	2.13059e+06
Q62203	3	3	158.95	1.11799e-13	1.97689	Condition 4	Condition 1	Splicing factor 3A subunit 2 OS=Mus musculus GN=Sf3a2 PE=1 SV=2	280186	254074	233551	241167	296321	282752	534099	490281	500226	480437	493305	503954	421765	406226	477761	437387	446502	415758	551116	521671	499139	485981	534678	546819	222688	227106	180410	229273	232118	268156	398219	490281	416029	481565	423312	508868	225693	235968	269439	301264	252323
P63101	14	13	1463.11	1.30229e-13	1.45633	Condition 1	Condition 2	14-3-3 protein zeta/delta OS=Mus musculus GN=Ywhaz PE=1 SV=1	4.21559e+07	4.56835e+07	4.32261e+07	4.1958e+07	4.26252e+07	4.43749e+07	2.9991e+07	2.97553e+07	2.94846e+07	2.86916e+07	3.09953e+07	2.96288e+07	3.45983e+07	3.62137e+07	3.30534e+07	3.57696e+07	3.34162e+07	3.4842e+07	3.73301e+07	3.87849e+07	3.6082e+07	3.80287e+07	3.66244e+07	3.95363e+07	3.35048e+07	4.08346e+07	3.33907e+07	3.98888e+07	3.33897e+07	4.20842e+07	2.2361e+07	2.97553e+07	2.45219e+07	2.87589e+07	2.65974e+07	2.99177e+07	1.85141e+07	2.10357e+07	1.86408e+07	2.46374e+07	1.88838e+07
Q99020	13	13	1247.92	1.31783e-13	1.62588	Condition 4	Condition 1	Heterogeneous nuclear ribonucleoprotein A/B OS=Mus musculus GN=Hnrnpab PE=1 SV=1	4.85283e+06	5.23441e+06	4.81608e+06	5.22884e+06	4.66184e+06	4.89967e+06	6.70425e+06	6.72998e+06	7.08965e+06	7.26758e+06	6.19974e+06	6.82342e+06	7.74896e+06	8.32123e+06	7.19328e+06	7.74171e+06	8.32937e+06	7.72958e+06	8.12186e+06	7.81859e+06	8.04229e+06	7.99247e+06	8.24597e+06	8.05716e+06	3.85695e+06	4.67882e+06	3.72026e+06	4.97097e+06	3.65177e+06	4.64674e+06	4.99863e+06	6.72998e+06	5.89634e+06	7.28464e+06	5.32008e+06	6.88995e+06	4.14658e+06	4.83362e+06	4.05673e+06	5.33234e+06	4.707e+06
Q08943	8	8	337.26	1.42775e-13	1.88952	Condition 3	Condition 1	FACT complex subunit SSRP1 OS=Mus musculus GN=Ssrp1 PE=1 SV=2	357485	341513	339271	354694	352953	314265	527356	563843	594260	562487	588878	573705	697110	666872	664519	664716	593720	605819	632164	632942	549609	593590	521833	596144	284123	305264	262075	337202	276479	298042	393192	563843	494236	563807	505324	579299	373034	387371	374762	457844	335516
P03995	20	19	1430.25	1.47438e-13	2.11679	Condition 3	Condition 2	Glial fibrillary acidic protein OS=Mus musculus GN=Gfap PE=1 SV=4	1.08654e+06	1.12194e+06	997577	1.10306e+06	976822	1.00585e+06	613728	740960	681967	608916	646521	637972	1.3319e+06	1.61182e+06	1.29923e+06	1.35357e+06	1.28791e+06	1.43471e+06	1.10973e+06	1.12079e+06	1.09574e+06	1.11318e+06	1.0381e+06	1.13708e+06	863562	1.00286e+06	770595	1.04866e+06	765176	953925	457590	740960	567180	610345	554788	644193	712718	936271	732717	932315	727808
Q9EP89	2	2	105.94	1.50324e-13	2.11259	Condition 2	Condition 1	Serine beta-lactamase-like protein LACTB, mitochondrial OS=Mus musculus GN=Lactb PE=1 SV=1	174653	176400	209089	181512	158936	183760	366953	403005	366863	375872	369725	408369	356192	435042	323601	365178	328744	335706	370314	368723	367616	376121	365793	378031	138812	157677	161514	172561	124500	174274	273597	403005	305113	376755	317266	412351	190603	252706	182498	251527	185776
Q3UTJ2	11	10	629.96	1.53655e-13	1.97382	Condition 3	Condition 2	Sorbin and SH3 domain-containing protein 2 OS=Mus musculus GN=Sorbs2 PE=1 SV=2	682784	746413	724025	737432	699587	721234	543859	544376	549246	551671	569070	538482	1.0124e+06	1.32973e+06	1.02267e+06	1.08264e+06	1.02214e+06	1.03751e+06	735425	776992	768562	754846	805299	767047	542666	667188	559285	701064	548009	684003	405496	544376	456798	552965	488326	543732	541748	772414	576745	745701	577620
P70257	4	4	398.02	1.54543e-13	1.55705	Condition 2	Condition 1	Nuclear factor 1 X-type OS=Mus musculus GN=Nfix PE=1 SV=2	474249	487868	451175	468948	484129	494082	770000	786199	752491	696857	713505	734822	758921	795015	738831	744497	713307	690526	542415	525827	526140	514632	451600	500467	376926	436086	348517	445821	379234	468577	574105	786199	625834	698492	612268	741987	406110	461807	416671	512795	403096
Q9D0E1	31	31	2219.97	1.54876e-13	1.52993	Condition 4	Condition 1	Heterogeneous nuclear ribonucleoprotein M OS=Mus musculus GN=Hnrnpm PE=1 SV=3	3.02955e+06	2.93405e+06	3.06261e+06	3.01181e+06	2.92844e+06	2.932e+06	4.67244e+06	4.39193e+06	4.46444e+06	4.38066e+06	4.18184e+06	4.24657e+06	4.03245e+06	3.69094e+06	3.9808e+06	3.73491e+06	4.06039e+06	3.57757e+06	4.72813e+06	4.4862e+06	4.69122e+06	4.36608e+06	4.75913e+06	4.35268e+06	2.40784e+06	2.62263e+06	2.36577e+06	2.86328e+06	2.29395e+06	2.78065e+06	3.48373e+06	4.39193e+06	3.713e+06	4.39094e+06	3.58849e+06	4.28797e+06	2.15782e+06	2.14398e+06	2.24501e+06	2.57253e+06	2.29456e+06
Q99JP6	9	9	678.27	1.57541e-13	2.36525	Condition 2	Condition 1	Homer protein homolog 3 OS=Mus musculus GN=Homer3 PE=1 SV=2	388303	394155	385693	388536	351678	416688	817970	911507	935551	891010	967805	975481	540383	634383	618573	615075	489930	634740	417376	484770	420566	450561	454586	379914	308617	352319	297935	369375	275481	395178	609871	911507	778081	893101	830486	984992	289167	368499	348851	423652	276864
Q99LY9	3	3	127.74	1.63536e-13	2.76392	Condition 4	Condition 1	0DH dehydroge0se [ubiquinone] iron-sulfur protein 5 OS=Mus musculus GN=Ndufs5 PE=1 SV=3	88063.7	88530.3	92803.5	71524.8	92917.7	77946	159273	149495	177964	162039	149168	148873	172962	135159	167378	152538	178752	158799	253526	236109	210193	232639	230183	251887	69991.7	79133.6	71687.6	67997.5	72785.4	73922.4	118753	149495	148009	162419	128003	150325	92554.3	78511	94394.8	105065	101014
P62307	2	2	130.32	1.82077e-13	2.08078	Condition 3	Condition 1	Small nuclear ribonucleoprotein F OS=Mus musculus GN=Snrpf PE=1 SV=1	188313	190193	198987	178009	185022	174272	264928	288381	291502	269124	277082	281524	386901	342796	389034	374650	387297	438969	327773	323428	302380	292499	263144	300665	149668	170006	153711	169231	144934	165275	197528	288381	242437	269756	237768	284269	207036	199123	219400	258051	218865
Q8K4Z5	17	16	945	2.05391e-13	1.82638	Condition 4	Condition 1	Splicing factor 3A subunit 1 OS=Mus musculus GN=Sf3a1 PE=1 SV=1	867343	870614	969291	1.01566e+06	927334	848896	1.66631e+06	1.55616e+06	1.61622e+06	1.744e+06	1.59526e+06	1.64146e+06	1.69511e+06	1.93193e+06	1.57368e+06	1.62974e+06	1.50636e+06	1.57211e+06	1.6255e+06	1.60847e+06	1.68354e+06	1.71818e+06	1.76738e+06	1.64045e+06	689351	778206	748745	965574	726411	805075	1.24239e+06	1.55616e+06	1.34418e+06	1.74809e+06	1.36891e+06	1.65746e+06	907076	1.12222e+06	887494	1.12253e+06	851255
P37804	5	4	238.5	2.60902e-13	2.61191	Condition 3	Condition 2	Transgelin OS=Mus musculus GN=Tagln PE=1 SV=3	183719	202386	196020	226463	203677	216471	131664	114747	123193	136952	122715	131549	367056	392863	299575	319567	307158	300972	212973	199279	177096	212269	198465	214255	146017	180905	151419	215295	159547	205297	98167.3	114747	102457	137273	105304	132832	196417	228205	168948	220111	173578
Q8CH09	3	3	107.05	2.62235e-13	3.19324	Condition 4	Condition 1	SURP and G-patch domain-containing protein 2 OS=Mus musculus GN=Sugp2 PE=1 SV=2	49537.3	66599	51870.2	51821.3	50152.7	50638.2	114082	138295	126743	136750	97736.9	103036	142123	182602	183585	142245	147823	169017	168395	180534	185388	169312	164820	155363	39371.5	59530.1	40068	49265.6	39286.2	48024.1	85058.3	138295	105410	137071	83869.3	104041	76052.3	106069	103535	97975.9	83536.4
Q9D6J6	4	4	224.48	2.64899e-13	1.81471	Condition 4	Condition 1	0DH dehydroge0se [ubiquinone] flavoprotein 2, mitochondrial OS=Mus musculus GN=Ndufv2 PE=1 SV=2	532709	528274	526688	517387	506514	481203	703442	704242	701559	767040	700470	753328	772056	927348	788464	850608	774432	895281	910029	910053	909872	883831	1.00177e+06	996930	423389	472203	406849	491871	396769	456363	524480	704242	583474	768840	601083	760673	413139	538676	444662	585882	437639
O54931	12	12	813.7	2.69229e-13	1.90576	Condition 4	Condition 1	A-ki0se anchor protein 2 OS=Mus musculus GN=Akap2 PE=1 SV=3	608751	580559	588560	600040	550801	590530	853158	1.10953e+06	940345	946373	961218	1.01402e+06	962611	1.07571e+06	975879	1.00623e+06	914761	961296	1.0832e+06	1.23355e+06	1.0442e+06	1.11996e+06	1.11357e+06	1.11234e+06	483826	518938	454643	570448	431460	560046	636107	1.10953e+06	782068	948594	824834	1.0239e+06	515107	624856	550357	693069	516940
Q62425	2	2	103.99	2.7256e-13	2.58267	Condition 4	Condition 1	Cytochrome c oxidase subunit NDUFA4 OS=Mus musculus GN=Ndufa4 PE=1 SV=2	263969	266329	262011	280770	218596	230104	470758	451586	434282	487601	402038	458493	436114	550294	452007	414585	466519	450610	630689	665568	579343	650625	698633	705398	209799	238061	202395	266923	171234	218226	350993	451586	361184	488746	344994	462963	233371	319654	254914	285558	263634
O88569	28	24	2951.46	2.9432e-13	1.73566	Condition 3	Condition 1	Heterogeneous nuclear ribonucleoproteins A2/B1 OS=Mus musculus GN=Hnrnpa2b1 PE=1 SV=2	4.73482e+07	4.93874e+07	5.07782e+07	4.9101e+07	4.54048e+07	4.78292e+07	7.98857e+07	7.495e+07	8.06447e+07	8.30008e+07	8.15984e+07	7.49025e+07	8.65831e+07	9.73708e+07	8.05107e+07	8.07908e+07	8.24156e+07	7.54074e+07	8.32923e+07	8.24799e+07	8.1876e+07	7.81073e+07	8.47995e+07	7.62711e+07	3.76316e+07	4.41454e+07	3.92245e+07	4.66795e+07	3.55671e+07	4.53602e+07	5.95621e+07	7.495e+07	6.70708e+07	8.31956e+07	7.00206e+07	7.56328e+07	4.63319e+07	5.65606e+07	4.54048e+07	5.56471e+07	4.65738e+07
O08585	6	6	317.26	3.25961e-13	1.55236	Condition 1	Condition 3	Clathrin light chain A OS=Mus musculus GN=Clta PE=1 SV=2	4.16205e+06	4.4662e+06	4.30101e+06	4.51632e+06	4.02265e+06	4.45338e+06	3.18229e+06	3.15342e+06	3.01211e+06	3.3119e+06	3.08491e+06	3.1318e+06	2.63686e+06	2.99011e+06	2.71097e+06	2.84885e+06	2.69106e+06	2.82039e+06	2.82367e+06	3.08351e+06	2.73898e+06	3.03135e+06	2.95375e+06	2.99823e+06	3.30793e+06	3.99215e+06	3.32238e+06	4.29359e+06	3.15107e+06	4.22349e+06	2.37268e+06	3.15342e+06	2.50512e+06	3.31967e+06	2.64721e+06	3.16234e+06	1.41103e+06	1.73689e+06	1.52888e+06	1.96223e+06	1.52074e+06
Q9DCS9	3	3	145.31	3.66041e-13	6.60525	Condition 4	Condition 1	0DH dehydroge0se [ubiquinone] 1 beta subcomplex subunit 10 OS=Mus musculus GN=Ndufb10 PE=1 SV=3	82643.2	111537	109839	53029.5	111028	79734.6	297077	261464	257451	271812	273284	286132	276147	268612	347429	308214	235431	219857	577902	621249	604586	631092	610505	573097	65683.5	99698.4	84846.8	50414.3	86971.8	75618.6	221498	261464	214118	272450	234509	288922	147770	156031	195936	212292	133044
Q80WJ7	4	4	140.79	4.02345e-13	1.63217	Condition 4	Condition 1	Protein LYRIC OS=Mus musculus GN=Mtdh PE=1 SV=1	339381	361266	339657	366973	314495	373742	437550	454082	438538	435476	432722	409787	597779	562957	503486	545417	580704	518952	583781	577986	567408	565910	548645	576513	269735	322921	262374	348875	246354	354449	326233	454082	364724	436498	371324	413783	319880	327009	283946	375673	328161
Q9CPQ1	1	1	47.27	4.34874e-13	2.41417	Condition 4	Condition 1	Cytochrome c oxidase subunit 6C OS=Mus musculus GN=Cox6c PE=1 SV=3	147126	153679	133827	155399	124756	133737	217861	259516	265222	253908	248733	249387	263824	259731	281512	319790	264972	278233	319864	379499	360342	341001	291299	356475	116933	137367	103377	147735	97725.6	126834	162435	259516	220580	254504	213441	251818	141176	150872	158762	220265	149738
P62270	10	10	469.26	4.36651e-13	2.23258	Condition 1	Condition 2	40S ribosomal protein S18 OS=Mus musculus GN=Rps18 PE=1 SV=3	1.27885e+06	1.36717e+06	1.22633e+06	1.2815e+06	1.14195e+06	1.19132e+06	602362	624037	585897	544272	483250	513765	625697	668799	567017	649483	584803	516194	630910	641499	541686	640374	637553	599716	1.01641e+06	1.22206e+06	947298	1.2183e+06	894528	1.12982e+06	449115	624037	487280	545550	414683	518774	334820	388491	319775	447351	330477
Q9Z140	3	3	163.33	4.37095e-13	1.72396	Condition 4	Condition 2	Copine-6 OS=Mus musculus GN=Cpne6 PE=1 SV=1	335107	318861	323266	294267	302145	309884	200711	176726	206442	187398	207677	175615	320496	273712	301158	294546	298407	297363	335448	324736	315575	329274	330424	354974	266338	285017	249712	279754	236680	293887	149648	176726	171694	187837	178210	177327	171502	158993	169841	202877	168633
Q9DCX2	7	7	658.91	4.40092e-13	2.75959	Condition 4	Condition 1	ATP synthase subunit d, mitochondrial OS=Mus musculus GN=Atp5h PE=1 SV=3	2.2e+06	1.92183e+06	1.83772e+06	1.74131e+06	2.14716e+06	2.50686e+06	4.71741e+06	4.41506e+06	4.3221e+06	4.68923e+06	4.18975e+06	4.55793e+06	3.5998e+06	3.85402e+06	4.21427e+06	4.36396e+06	3.2468e+06	3.47076e+06	5.17406e+06	6.2045e+06	5.54502e+06	5.63811e+06	5.70699e+06	5.82571e+06	1.74853e+06	1.71785e+06	1.41958e+06	1.65543e+06	1.68194e+06	2.37745e+06	3.51726e+06	4.41506e+06	3.59461e+06	4.70023e+06	3.59528e+06	4.60237e+06	1.92631e+06	2.23871e+06	2.37668e+06	3.00581e+06	1.8348e+06
P50171	5	5	532.82	4.46754e-13	1.68452	Condition 4	Condition 1	Estradiol 17-beta-dehydroge0se 8 OS=Mus musculus GN=Hsd17b8 PE=1 SV=2	969322	928452	900801	900395	864081	890586	1.05263e+06	1.0172e+06	1.10546e+06	1.01341e+06	1.03461e+06	1.1073e+06	1.33716e+06	1.50065e+06	1.27499e+06	1.28874e+06	1.29023e+06	1.25982e+06	1.51794e+06	1.4857e+06	1.70188e+06	1.44606e+06	1.51916e+06	1.51605e+06	770402	829905	695839	855990	676862	844612	784834	1.0172e+06	919390	1.01578e+06	887816	1.1181e+06	715534	871695	719044	887659	729123
Q3TEA8	29	27	2080.33	4.5175e-13	4.21787	Condition 4	Condition 1	Heterochromatin protein 1-binding protein 3 OS=Mus musculus GN=Hp1bp3 PE=1 SV=1	1.85056e+06	1.79835e+06	1.2787e+06	1.29794e+06	2.1167e+06	2.0068e+06	5.97998e+06	5.54558e+06	5.51246e+06	5.84477e+06	5.0764e+06	5.21117e+06	4.15583e+06	6.44865e+06	6.05859e+06	5.4466e+06	5.19763e+06	4.77012e+06	6.90637e+06	7.37814e+06	7.43756e+06	7.2027e+06	7.97587e+06	6.75031e+06	1.4708e+06	1.60747e+06	987753	1.23393e+06	1.65808e+06	1.9032e+06	4.45862e+06	5.54558e+06	4.58461e+06	5.85848e+06	4.35613e+06	5.26198e+06	2.22385e+06	3.74588e+06	3.4168e+06	3.75151e+06	2.93723e+06
Q91VM5	3	3	249.36	4.62963e-13	1.8916	Condition 3	Condition 1	R0 binding motif protein, X-linked-like-1 OS=Mus musculus GN=Rbmxl1 PE=1 SV=1	743837	707496	735398	677783	619725	646764	1.01155e+06	990723	1.10574e+06	1.17004e+06	1.16782e+06	1.14409e+06	1.1802e+06	1.441e+06	1.27033e+06	1.27309e+06	1.32635e+06	1.32324e+06	1.24182e+06	1.24906e+06	1.21591e+06	1.31428e+06	1.2505e+06	1.38315e+06	591190	632401	568070	644357	485451	613377	754201	990723	919624	1.17279e+06	1.00213e+06	1.15524e+06	631545	837045	716415	876878	749532
P62748	3	2	128	4.70735e-13	2.09291	Condition 1	Condition 4	Hippocalcin-like protein 1 OS=Mus musculus GN=Hpcal1 PE=1 SV=2	597662	594727	658387	628316	596845	586615	472349	413769	396135	466091	415046	434050	505929	625587	540203	521205	508689	602089	296371	281912	306890	273357	326263	265189	475012	531602	508582	597330	467528	556333	352179	413769	329459	467185	356156	438281	270730	363389	304653	358996	287465
Q8R1F0	2	2	55.57	4.7462e-13	1.97491	Condition 3	Condition 1	Leydig cell tumor 10 kDa protein homolog OS=Mus musculus GN=D8Ertd738e PE=3 SV=1	72735.7	67926.8	74060.8	75428.2	66924.9	79168.9	137311	147525	149253	129150	141309	126437	138823	154960	158395	133944	148097	127326	103515	100062	97221.5	111240	105718	112200	57809.2	60717	57209.5	71708.3	52424.5	75082.1	102378	147525	124131	129453	121259	127670	74286.4	90013.1	89328.7	92258.3	83690.8
Q9CQZ5	1	1	44.51	4.80282e-13	3.04572	Condition 4	Condition 1	0DH dehydroge0se [ubiquinone] 1 alpha subcomplex subunit 6 OS=Mus musculus GN=Ndufa6 PE=1 SV=1	178633	184364	189209	196220	169287	182538	243577	216722	224442	223174	272654	206211	340835	304480	379109	291351	356526	277504	629062	471001	647799	588956	525922	488313	141975	164796	146158	186543	132608	173115	181609	216722	186664	223698	233968	208221	182386	176865	213802	200677	201476
Q00PI9	28	28	2230.11	5.06817e-13	1.87478	Condition 3	Condition 1	Heterogeneous nuclear ribonucleoprotein U-like protein 2 OS=Mus musculus GN=Hnrnpul2 PE=1 SV=2	3.2901e+06	3.45341e+06	3.17866e+06	3.35483e+06	3.00075e+06	3.24393e+06	5.90004e+06	6.17775e+06	5.52496e+06	5.80273e+06	5.71592e+06	5.80582e+06	5.96189e+06	7.50269e+06	5.86182e+06	5.70262e+06	5.82125e+06	5.74866e+06	5.74088e+06	5.9519e+06	5.19579e+06	5.54609e+06	5.61671e+06	5.41876e+06	2.61492e+06	3.08686e+06	2.45541e+06	3.18938e+06	2.35058e+06	3.07647e+06	4.39902e+06	6.17775e+06	4.59501e+06	5.81635e+06	4.90491e+06	5.86242e+06	3.19029e+06	4.35815e+06	3.30584e+06	3.92786e+06	3.28964e+06
Q62188	20	20	1723.2	5.19029e-13	1.63053	Condition 1	Condition 2	Dihydropyrimidi0se-related protein 3 OS=Mus musculus GN=Dpysl3 PE=1 SV=1	4.95272e+06	4.76357e+06	5.28753e+06	5.18714e+06	4.78608e+06	4.48555e+06	3.09586e+06	2.84038e+06	3.01076e+06	3.08644e+06	2.83124e+06	3.20471e+06	3.30842e+06	3.25337e+06	3.2277e+06	3.07725e+06	3.19949e+06	3.01912e+06	3.41666e+06	3.60579e+06	3.45734e+06	3.30988e+06	3.74853e+06	3.3833e+06	3.93635e+06	4.25796e+06	4.08444e+06	4.93133e+06	3.74909e+06	4.254e+06	2.30824e+06	2.84038e+06	2.50399e+06	3.09368e+06	2.42952e+06	3.23596e+06	1.77038e+06	1.88981e+06	1.82029e+06	2.11955e+06	1.80806e+06
Q8BG05	21	21	2329.96	5.26579e-13	1.80517	Condition 4	Condition 1	Heterogeneous nuclear ribonucleoprotein A3 OS=Mus musculus GN=Hnrnpa3 PE=1 SV=1	3.72247e+07	3.75823e+07	3.90785e+07	4.16523e+07	3.93992e+07	3.86378e+07	6.57045e+07	6.76309e+07	6.41335e+07	6.7168e+07	6.282e+07	6.91058e+07	6.42163e+07	7.64636e+07	5.79451e+07	6.04023e+07	6.04315e+07	5.84292e+07	6.88334e+07	7.00315e+07	7.31552e+07	6.88491e+07	7.23136e+07	6.84603e+07	2.95856e+07	3.35933e+07	3.01868e+07	3.95982e+07	3.08627e+07	3.66433e+07	4.89886e+07	6.76309e+07	5.33387e+07	6.73256e+07	5.39067e+07	6.97796e+07	3.43631e+07	4.4416e+07	3.26787e+07	4.16039e+07	3.41504e+07
Q9D554	10	10	688.62	6.24834e-13	1.65791	Condition 3	Condition 1	Splicing factor 3A subunit 3 OS=Mus musculus GN=Sf3a3 PE=1 SV=2	1.24951e+06	1.15976e+06	1.22898e+06	1.11398e+06	1.10223e+06	1.03074e+06	1.75384e+06	1.60504e+06	1.6788e+06	1.78364e+06	1.71784e+06	1.72557e+06	1.99853e+06	1.95584e+06	2.00037e+06	1.74109e+06	1.87791e+06	1.84132e+06	1.87033e+06	1.82983e+06	1.95651e+06	1.73278e+06	1.82722e+06	1.87171e+06	993087	1.03667e+06	949349	1.05904e+06	863414	977528	1.30765e+06	1.60504e+06	1.39623e+06	1.78782e+06	1.4741e+06	1.7424e+06	1.06944e+06	1.1361e+06	1.12813e+06	1.19923e+06	1.06122e+06
Q9JMG7	7	7	597.27	6.25944e-13	1.98587	Condition 4	Condition 1	Hepatoma-derived growth factor-related protein 3 OS=Mus musculus GN=Hdgfrp3 PE=1 SV=2	7.06723e+06	7.14438e+06	6.89122e+06	7.549e+06	7.37779e+06	7.06909e+06	1.1696e+07	1.06975e+07	1.09218e+07	1.13655e+07	1.01809e+07	1.07799e+07	1.36096e+07	1.64415e+07	1.22461e+07	1.26265e+07	1.41037e+07	1.1995e+07	1.45481e+07	1.48282e+07	1.38848e+07	1.41942e+07	1.4946e+07	1.31874e+07	5.61693e+06	6.38607e+06	5.32324e+06	7.17671e+06	5.77926e+06	6.70418e+06	8.72042e+06	1.06975e+07	9.08343e+06	1.13922e+07	8.73638e+06	1.0885e+07	7.28269e+06	9.55049e+06	6.90633e+06	8.69687e+06	7.97014e+06
Q6ZWV3	6	6	295.21	6.30829e-13	1.7529	Condition 1	Condition 2	60S ribosomal protein L10 OS=Mus musculus GN=Rpl10 PE=1 SV=3	621801	621774	646836	602387	591589	634171	364647	317208	374049	345690	363479	356302	409603	341868	427625	388413	400576	424685	412693	419599	420392	423589	427106	397183	494198	555778	499659	572679	463411	601434	271877	317208	311090	346501	311907	359775	219185	198584	241164	267531	226369
P14231	3	3	267.27	6.44818e-13	1.81129	Condition 2	Condition 1	Sodium/potassium-transporting ATPase subunit beta-2 OS=Mus musculus GN=Atp1b2 PE=1 SV=2	877083	848159	800233	754259	740590	748063	1.47224e+06	1.4474e+06	1.41703e+06	1.38431e+06	1.47554e+06	1.4404e+06	1.31041e+06	1.24753e+06	1.30259e+06	1.32605e+06	1.27466e+06	1.35933e+06	1.12501e+06	1.13657e+06	911279	1.12349e+06	1.09053e+06	1.01711e+06	697092	758135	618153	717061	580129	709447	1.09769e+06	1.4474e+06	1.17852e+06	1.38756e+06	1.26618e+06	1.45444e+06	701220	724663	734607	913356	720321
P17095	4	4	248.22	6.74794e-13	3.08892	Condition 3	Condition 1	High mobility group protein HMG-I/HMG-Y OS=Mus musculus GN=Hmga1 PE=1 SV=4	134707	132714	124291	194870	146868	130762	311855	297979	318810	291730	333148	315333	442455	430372	459064	459338	439103	439145	312345	391403	336369	368695	271172	376085	107063	118628	96010.6	185259	115046	124012	232516	297979	265149	292415	285879	318407	236764	249994	258894	316383	248141
Q99L43	1	1	110.39	7.0155e-13	2.05237	Condition 4	Condition 2	Phosphatidate cytidylyltransferase 2 OS=Mus musculus GN=Cds2 PE=1 SV=1	567343	637475	651529	640064	662159	633340	593662	586700	548738	590637	553101	610859	950018	1.15499e+06	877011	927838	872667	945952	1.15029e+06	1.28063e+06	1.04606e+06	1.12491e+06	1.20644e+06	1.3415e+06	450916	569813	503284	608498	518691	600646	442629	586700	456376	592024	474623	616815	508368	670911	494600	639077	493152
Q9CZM2	4	4	157.47	7.34524e-13	42.4167	Condition 1	Condition 2	60S ribosomal protein L15 OS=Mus musculus GN=Rpl15 PE=2 SV=4	167156	187331	171643	171550	166658	181590	5472.6	2130.11	3023.01	5923.16	2771.35	5338.22	8561.07	2669.08	5239.28	3247.28	4748.77	6362.22	1442.02	4289.4	2891.6	4094.01	5480.18	8077.19	132853	167448	132588	163090	130549	172216	4080.32	2130.11	2514.18	5937.06	2378.13	5390.27	4581.16	1550.41	2954.75	2236.66	2683.57
Q9CXY6	14	14	1748.88	7.40741e-13	1.60992	Condition 3	Condition 1	Interleukin enhancer-binding factor 2 OS=Mus musculus GN=Ilf2 PE=1 SV=1	5.3012e+06	5.33412e+06	5.37137e+06	5.41692e+06	5.50806e+06	5.3771e+06	8.04901e+06	7.6517e+06	8.00778e+06	8.14007e+06	7.68073e+06	7.84411e+06	8.64476e+06	1.02965e+07	7.99337e+06	8.25935e+06	8.49463e+06	8.32602e+06	8.32724e+06	8.62047e+06	8.35668e+06	8.5467e+06	8.55951e+06	7.92901e+06	4.21331e+06	4.76795e+06	4.1492e+06	5.14977e+06	4.31464e+06	5.09953e+06	6.00127e+06	7.6517e+06	6.65993e+06	8.15917e+06	6.59094e+06	7.92059e+06	4.62594e+06	5.98104e+06	4.50795e+06	5.68888e+06	4.80039e+06
P02088	14	13	1813.63	8.56093e-13	1.44521	Condition 1	Condition 2	Hemoglobin subunit beta-1 OS=Mus musculus GN=Hbb-b1 PE=1 SV=2	1.64495e+08	1.58849e+08	1.68805e+08	1.64623e+08	1.58559e+08	1.54164e+08	1.20629e+08	1.07692e+08	1.1243e+08	1.11408e+08	1.08708e+08	1.09966e+08	1.36161e+08	1.3109e+08	1.26977e+08	1.28529e+08	1.32582e+08	1.23499e+08	1.38032e+08	1.37291e+08	1.37806e+08	1.33961e+08	1.45186e+08	1.33464e+08	1.30738e+08	1.41988e+08	1.30396e+08	1.56504e+08	1.24204e+08	1.46206e+08	8.99399e+07	1.07692e+08	9.35058e+07	1.1167e+08	9.32837e+07	1.11038e+08	7.28617e+07	7.6147e+07	7.16101e+07	8.85281e+07	7.49231e+07
P18894	3	3	148.4	8.57092e-13	2.40721	Condition 2	Condition 1	D-amino-acid oxidase OS=Mus musculus GN=Dao PE=1 SV=3	131838	128303	105675	121943	92635.3	109391	290794	266549	289180	282893	244237	286800	276282	283736	261791	251456	249559	263025	186728	164364	143576	177913	166066	190025	104782	114685	81630.2	115929	72564.2	103744	216813	266549	240506	283557	209583	289596	147843	164816	147640	173198	141028
P57784	10	10	683.5	9.00835e-13	1.5814	Condition 2	Condition 1	U2 small nuclear ribonucleoprotein A' OS=Mus musculus GN=Snrpa1 PE=1 SV=2	750028	813422	813929	738001	764204	759561	1.25689e+06	1.19956e+06	1.25062e+06	1.24882e+06	1.18522e+06	1.19524e+06	1.28123e+06	1.21704e+06	1.18703e+06	1.17182e+06	1.22843e+06	1.11456e+06	1.27719e+06	1.22712e+06	1.03357e+06	1.20086e+06	1.25172e+06	1.20742e+06	596111	727084	628733	701605	598626	720351	937123	1.19956e+06	1.04012e+06	1.25176e+06	1.01706e+06	1.2069e+06	685603	706952	669438	807125	694199
P23198	5	5	460.28	9.84102e-13	1.5687	Condition 3	Condition 1	Chromobox protein homolog 3 OS=Mus musculus GN=Cbx3 PE=1 SV=2	3.40643e+06	3.59894e+06	3.10899e+06	3.22205e+06	3.09271e+06	3.25753e+06	4.35731e+06	4.28795e+06	4.01353e+06	4.34782e+06	4.53895e+06	4.38865e+06	5.17074e+06	5.22041e+06	5.40969e+06	4.82916e+06	5.17851e+06	5.07391e+06	4.93191e+06	4.82778e+06	4.85963e+06	5.27882e+06	4.56845e+06	5.01832e+06	2.70738e+06	3.21694e+06	2.40159e+06	3.06315e+06	2.42262e+06	3.08937e+06	3.24877e+06	4.28795e+06	3.33798e+06	4.35802e+06	3.89493e+06	4.43144e+06	2.76694e+06	3.03242e+06	3.05085e+06	3.32623e+06	2.92642e+06
P14602	3	3	102.11	9.9265e-13	1.80868	Condition 3	Condition 1	Heat shock protein beta-1 OS=Mus musculus GN=Hspb1 PE=1 SV=3	216238	200175	190391	222255	196696	181651	261787	240915	232485	255048	227553	234836	355177	410371	364193	323593	374879	355593	319244	343491	338934	324596	355359	343709	171863	178928	147071	211294	154078	172274	195186	240915	193353	255647	195266	237126	190060	238376	205391	222884	211848
P62823	7	6	624.39	1.03062e-12	1.41295	Condition 1	Condition 3	Ras-related protein Rab-3C OS=Mus musculus GN=Rab3c PE=1 SV=1	1.90169e+06	1.98466e+06	2.15188e+06	1.98832e+06	2.06559e+06	2.01113e+06	1.65232e+06	1.4819e+06	1.48259e+06	1.4974e+06	1.43546e+06	1.53936e+06	1.48513e+06	1.43714e+06	1.40033e+06	1.40496e+06	1.45101e+06	1.38737e+06	1.9188e+06	2.05507e+06	1.94483e+06	1.84933e+06	2.08014e+06	1.96808e+06	1.51143e+06	1.77401e+06	1.66226e+06	1.89026e+06	1.61804e+06	1.90731e+06	1.23196e+06	1.4819e+06	1.23304e+06	1.50092e+06	1.23179e+06	1.55437e+06	794717	834805	789733	967708	819979
Q99JY0	24	24	1769.34	1.08547e-12	1.68829	Condition 4	Condition 1	Trifunctio0l enzyme subunit beta, mitochondrial OS=Mus musculus GN=Hadhb PE=1 SV=1	2.03985e+06	1.93696e+06	2.16521e+06	2.08606e+06	1.8837e+06	1.85033e+06	2.31157e+06	2.15747e+06	2.13224e+06	2.30348e+06	2.34475e+06	2.34308e+06	2.81537e+06	3.00393e+06	2.78234e+06	2.6294e+06	2.69666e+06	2.62989e+06	3.35439e+06	3.30206e+06	3.32378e+06	3.28942e+06	3.74093e+06	3.18495e+06	1.62124e+06	1.73137e+06	1.67255e+06	1.98318e+06	1.47557e+06	1.75482e+06	1.72349e+06	2.15747e+06	1.77335e+06	2.30888e+06	2.01206e+06	2.36593e+06	1.50654e+06	1.74492e+06	1.56913e+06	1.81108e+06	1.52391e+06
Q9ERK4	6	6	252.46	1.38822e-12	1.54147	Condition 1	Condition 2	Exportin-2 OS=Mus musculus GN=Cse1l PE=1 SV=1	353001	366817	384982	342203	334283	387977	237652	228976	219922	238763	245436	236518	281310	286890	265016	282261	266231	282337	262889	259510	273252	259183	272754	275863	280559	327883	297386	325327	261855	367949	177191	228976	182906	239323	210612	238825	150533	166648	149459	194416	150449
Q61686	6	5	389.7	1.50291e-12	1.82786	Condition 4	Condition 1	Chromobox protein homolog 5 OS=Mus musculus GN=Cbx5 PE=1 SV=1	1.17885e+06	1.33707e+06	1.28935e+06	1.18783e+06	1.35408e+06	1.35063e+06	2.00312e+06	1.77331e+06	1.90088e+06	2.02322e+06	1.73831e+06	1.8401e+06	2.42665e+06	2.27329e+06	2.10262e+06	2.10513e+06	2.18704e+06	2.19867e+06	2.40263e+06	2.37228e+06	2.11116e+06	2.16838e+06	2.47465e+06	2.54141e+06	936934	1.19516e+06	995980	1.12925e+06	1.0607e+06	1.28091e+06	1.49351e+06	1.77331e+06	1.58093e+06	2.02796e+06	1.49167e+06	1.85804e+06	1.29854e+06	1.3205e+06	1.1858e+06	1.44997e+06	1.23592e+06
P62983	1	1	102.87	1.51412e-12	2.27226	Condition 1	Condition 2	Ubiquitin-40S ribosomal protein S27a OS=Mus musculus GN=Rps27a PE=1 SV=2	1.54037e+06	1.5398e+06	1.35571e+06	1.39639e+06	1.26363e+06	1.34069e+06	643334	655143	582899	601576	581135	648781	750735	1.06411e+06	818456	758737	779483	837229	730976	783207	727905	768781	760005	733872	1.22426e+06	1.37636e+06	1.04724e+06	1.32752e+06	989845	1.27149e+06	479664	655143	484786	602988	498680	655106	401729	618120	461577	522603	440493
Q99LB2	7	7	527.67	1.53455e-12	1.97831	Condition 3	Condition 1	Dehydroge0se/reductase SDR family member 4 OS=Mus musculus GN=Dhrs4 PE=1 SV=3	412137	439468	560597	436404	439668	463909	691676	756707	742528	786686	732984	732305	866451	1.06067e+06	834070	913987	897617	871867	846961	890715	819362	887253	892033	912189	327560	392822	433042	414882	344406	439962	515707	756707	617548	788532	628983	739444	463650	616118	470382	629537	507252
Q9CZJ2	10	8	772.86	1.55487e-12	1.34133	Condition 1	Condition 4	Heat shock 70 kDa protein 12B OS=Mus musculus GN=Hspa12b PE=1 SV=1	5.13869e+06	5.40648e+06	5.00974e+06	5.12932e+06	5.07454e+06	5.0984e+06	3.90217e+06	3.80373e+06	3.68441e+06	4.07381e+06	3.86265e+06	4.05807e+06	3.88799e+06	4.13862e+06	3.96775e+06	4.05408e+06	3.82267e+06	4.1482e+06	3.73514e+06	3.89535e+06	3.78125e+06	3.98566e+06	3.68573e+06	3.9217e+06	4.08415e+06	4.83263e+06	3.86985e+06	4.87636e+06	3.97505e+06	4.83522e+06	2.90942e+06	3.80373e+06	3.06426e+06	4.08338e+06	3.31459e+06	4.09763e+06	2.08052e+06	2.40404e+06	2.23765e+06	2.79237e+06	2.16023e+06
P60904	1	1	32.78	1.57319e-12	1.82175	Condition 1	Condition 2	D0J homolog subfamily C member 5 OS=Mus musculus GN=D0jc5 PE=1 SV=1	1.52864e+06	1.5709e+06	1.43736e+06	1.49295e+06	1.39777e+06	1.4785e+06	801756	851234	726713	840043	875775	793251	1.10275e+06	1.26029e+06	1.13813e+06	1.22774e+06	1.09733e+06	1.00505e+06	1.30952e+06	1.4767e+06	1.349e+06	1.38867e+06	1.53538e+06	1.37582e+06	1.21494e+06	1.40416e+06	1.11031e+06	1.41933e+06	1.09492e+06	1.40218e+06	597782	851234	604394	842015	751514	800985	590098	732072	641859	845643	620109
Q6PB90	1	1	15.96	1.58251e-12	1.82759	Condition 1	Condition 3	Protocadherin beta-14 OS=Mus musculus GN=Pcdhb14 PE=1 SV=2	584117	671275	600618	671268	624107	665604	350153	382472	358689	433047	408409	383950	368331	359567	343338	367836	308564	340894	369496	391443	412312	409816	394463	394029	464247	600026	463957	638163	488883	631244	261071	382472	298315	434064	350461	387694	197100	208864	193629	253359	174373
P63089	6	6	409.28	1.73628e-12	1.94261	Condition 3	Condition 1	Pleiotrophin OS=Mus musculus GN=Ptn PE=1 SV=1	1.71676e+06	1.80769e+06	1.79352e+06	1.73974e+06	1.76243e+06	1.74015e+06	2.51196e+06	2.48362e+06	2.47503e+06	2.50538e+06	2.45331e+06	2.53563e+06	3.20701e+06	4.54184e+06	3.09271e+06	3.26803e+06	3.16876e+06	3.23621e+06	3.50888e+06	3.47712e+06	3.40993e+06	3.29872e+06	3.46425e+06	3.34737e+06	1.36445e+06	1.61582e+06	1.38544e+06	1.65394e+06	1.38057e+06	1.65032e+06	1.87289e+06	2.48362e+06	2.05844e+06	2.51126e+06	2.10521e+06	2.56035e+06	1.71612e+06	2.63825e+06	1.74417e+06	2.25096e+06	1.7907e+06
P70460	3	3	213.49	1.8584e-12	1.86561	Condition 4	Condition 1	Vasodilator-stimulated phosphoprotein OS=Mus musculus GN=Vasp PE=1 SV=4	212774	199251	169843	206375	164996	199630	253688	273176	242747	274102	268339	252967	386430	332752	367272	368728	328501	348485	346840	369108	367406	382967	340085	344399	169109	178103	131198	196198	129246	189325	189147	273176	201889	274745	230266	255434	206784	193288	207127	253973	185639
Q61545	3	3	157.43	2.0165e-12	1.75571	Condition 1	Condition 4	R0-binding protein EWS OS=Mus musculus GN=Ewsr1 PE=1 SV=2	982504	1.06129e+06	1.02563e+06	971394	976831	1.00768e+06	719480	739226	702534	702985	680601	693881	695243	744119	748415	701572	822295	764232	583245	581055	534193	652759	563417	517173	780879	948643	792261	923488	765184	955661	536438	739226	584285	704635	584032	700646	372034	432242	422077	483229	464686
P50247	6	5	320.03	2.03138e-12	1.77947	Condition 1	Condition 2	Adenosylhomocystei0se OS=Mus musculus GN=Ahcy PE=1 SV=3	329708	315430	317881	284386	303263	320944	176287	177409	152225	178458	193263	174140	261328	243588	245794	271669	247359	228993	258611	245385	248495	255956	246673	240134	262047	281950	245553	270361	237555	304376	131438	177409	126603	178877	165841	175838	139841	141495	138618	187121	139785
Q3TES0	6	6	377.16	2.21068e-12	1.64926	Condition 4	Condition 2	IQ motif and SEC7 domain-containing protein 3 OS=Mus musculus GN=Iqsec3 PE=1 SV=1	293461	287006	298029	314214	264501	295604	244319	247762	237922	256277	230317	235375	388043	374292	337268	353674	361999	319199	391673	406305	394150	411256	375033	416265	233238	256543	230218	298718	207192	280345	182162	247762	197875	256879	197638	237670	207648	217418	190206	243604	204569
Q8K3E5	1	1	30.98	2.2381e-12	2.76403	Condition 4	Condition 2	Jouberin OS=Mus musculus GN=Ahi1 PE=1 SV=2	142556	152857	166392	190067	191830	178998	122606	127222	144604	159450	136332	139521	328098	415667	309461	399895	278175	301218	334418	411557	349877	417602	402402	377559	113301	136632	128532	180693	150267	169758	91413.8	127222	120264	159824	116989	140882	175570	241452	174524	275440	157199
Q62465	17	16	1501.96	2.63478e-12	1.32785	Condition 4	Condition 1	Sy0ptic vesicle membrane protein VAT-1 homolog OS=Mus musculus GN=Vat1 PE=1 SV=3	5.0284e+06	5.43464e+06	5.15793e+06	5.23851e+06	5.10364e+06	5.47343e+06	5.4545e+06	5.37918e+06	5.22108e+06	5.11235e+06	5.23898e+06	5.08123e+06	6.73486e+06	6.96185e+06	6.20982e+06	6.8409e+06	6.536e+06	6.57654e+06	6.86147e+06	7.26369e+06	6.65219e+06	7.00483e+06	6.64173e+06	7.31906e+06	3.9965e+06	4.8578e+06	3.98433e+06	4.98016e+06	3.99785e+06	5.19088e+06	4.06683e+06	5.37918e+06	4.34228e+06	5.12435e+06	4.49564e+06	5.13077e+06	3.60392e+06	4.04399e+06	3.50209e+06	4.71188e+06	3.69355e+06
Q8CCS6	1	1	94.94	2.72693e-12	1.6117	Condition 2	Condition 1	Polyadenylate-binding protein 2 OS=Mus musculus GN=Pabpn1 PE=1 SV=3	1.25527e+06	1.42228e+06	1.27246e+06	1.33894e+06	1.07497e+06	1.28675e+06	2.02143e+06	2.06367e+06	2.08023e+06	2.01646e+06	1.98803e+06	2.16078e+06	2.02951e+06	2.15731e+06	2.07173e+06	2.11426e+06	1.91773e+06	1.94297e+06	1.99267e+06	2.0398e+06	2.00934e+06	1.96021e+06	2.18018e+06	1.99926e+06	997668	1.27132e+06	982932	1.27291e+06	842059	1.22033e+06	1.50716e+06	2.06367e+06	1.73009e+06	2.0212e+06	1.70596e+06	2.18185e+06	1.08602e+06	1.25313e+06	1.16838e+06	1.45626e+06	1.08372e+06
Q8R1S0	3	2	106.13	2.87481e-12	2.40754	Condition 4	Condition 2	Ubiquinone biosynthesis monooxyge0se COQ6, mitochondrial OS=Mus musculus GN=Coq6 PE=1 SV=3	61535.2	59449.4	61613	69659.9	80123	70572.3	50671	65198.3	49019.9	50596.3	45971	54284.7	72361.5	74798.3	68988	71831.2	76075.4	75695.3	118846	128463	119922	141620	126086	125221	48907.2	53139.4	47594	66224.5	62763	66929.3	37779.9	65198.3	40769	50715	39448.3	54814	38721.7	43448.7	38906.5	49476	42990.9
P12787	6	5	383.31	3.75577e-12	2.99802	Condition 4	Condition 1	Cytochrome c oxidase subunit 5A, mitochondrial OS=Mus musculus GN=Cox5a PE=1 SV=2	1.2938e+06	1.26404e+06	936602	964791	1.18679e+06	1.26477e+06	2.49041e+06	2.89772e+06	3.87351e+06	3.07169e+06	3.2995e+06	3.05396e+06	2.16887e+06	2.41582e+06	2.93293e+06	2.91277e+06	2.28761e+06	2.38058e+06	3.48199e+06	3.73087e+06	3.28497e+06	3.50717e+06	3.40317e+06	3.3105e+06	1.0283e+06	1.12988e+06	723494	917210	929648	1.19948e+06	1.85683e+06	2.89772e+06	3.22153e+06	3.0789e+06	2.83135e+06	3.08373e+06	1.16059e+06	1.4033e+06	1.65406e+06	2.00626e+06	1.29275e+06
P63328	32	29	2804.15	3.86768e-12	1.51057	Condition 1	Condition 3	Serine/threonine-protein phosphatase 2B catalytic subunit alpha isoform OS=Mus musculus GN=Ppp3ca PE=1 SV=1	2.19808e+07	2.10818e+07	2.19247e+07	2.2248e+07	2.14761e+07	2.08798e+07	1.66834e+07	1.65135e+07	1.70193e+07	1.76551e+07	1.63645e+07	1.76174e+07	1.44333e+07	1.57949e+07	1.33981e+07	1.43587e+07	1.42003e+07	1.36045e+07	1.58462e+07	1.69798e+07	1.54703e+07	1.65808e+07	1.74684e+07	1.58526e+07	1.747e+07	1.88442e+07	1.69361e+07	2.11508e+07	1.6823e+07	1.98019e+07	1.2439e+07	1.65135e+07	1.41547e+07	1.76965e+07	1.40426e+07	1.77892e+07	7.72345e+06	9.17489e+06	7.55599e+06	9.89e+06	8.0247e+06
P08207	1	1	117.91	3.88622e-12	1.74533	Condition 3	Condition 1	Protein S100-A10 OS=Mus musculus GN=S100a10 PE=1 SV=2	807838	857929	898996	883055	789513	859420	1.04313e+06	1.00866e+06	1.01514e+06	1.10597e+06	962022	953893	1.47789e+06	1.61738e+06	1.36852e+06	1.50194e+06	1.42727e+06	1.50252e+06	1.13253e+06	1.10763e+06	1.00004e+06	999617	1.12843e+06	1.16676e+06	642057	766868	694445	839506	618451	815056	777751	1.00866e+06	844275	1.10857e+06	825524	963193	790843	939503	771790	1.03451e+06	806561
O89023	4	4	277.3	3.9353e-12	1.81285	Condition 4	Condition 1	Tripeptidyl-peptidase 1 OS=Mus musculus GN=Tpp1 PE=1 SV=2	857744	878309	845334	793738	786465	771193	1.03221e+06	1.02991e+06	944033	953286	1.12855e+06	994615	1.38738e+06	1.28746e+06	1.39747e+06	1.28163e+06	1.47916e+06	1.24637e+06	1.53372e+06	1.37115e+06	1.7202e+06	1.4368e+06	1.46186e+06	1.41866e+06	681721	785085	652992	754594	616064	731383	769604	1.02991e+06	785135	955523	968421	1.00431e+06	742405	747857	788117	882761	835885
Q9Z0P5	10	10	731.82	3.99414e-12	1.36331	Condition 1	Condition 4	Twinfilin-2 OS=Mus musculus GN=Twf2 PE=1 SV=1	3.43334e+06	3.23201e+06	3.48247e+06	3.50699e+06	3.24692e+06	3.44831e+06	2.86602e+06	2.77414e+06	2.58771e+06	2.86629e+06	2.59207e+06	2.75385e+06	2.61461e+06	2.59984e+06	2.41432e+06	2.49545e+06	2.52388e+06	2.49406e+06	2.55315e+06	2.4488e+06	2.51525e+06	2.38355e+06	2.5546e+06	2.47156e+06	2.72877e+06	2.88897e+06	2.69009e+06	3.33403e+06	2.54342e+06	3.2703e+06	2.13688e+06	2.77414e+06	2.15216e+06	2.87302e+06	2.22429e+06	2.7807e+06	1.39912e+06	1.51019e+06	1.36158e+06	1.71882e+06	1.42627e+06
Q8BXT1	2	2	113.85	4.12037e-12	1.84904	Condition 2	Condition 1	Regulator of G-protein sig0ling 8 OS=Mus musculus GN=Rgs8 PE=1 SV=1	266045	295495	271317	262075	271183	250455	532667	490029	492518	495115	468925	509852	463643	517494	400257	474403	417648	445202	391130	317120	339190	360725	364849	337609	211449	264131	209583	249150	212427	237527	397151	490029	409618	496277	402391	514823	248102	300601	225729	326760	236017
Q99LC3	5	5	322.48	4.24505e-12	6.40526	Condition 4	Condition 1	0DH dehydroge0se [ubiquinone] 1 alpha subcomplex subunit 10, mitochondrial OS=Mus musculus GN=Ndufa10 PE=1 SV=1	65542.8	65504.1	47515.2	65376.6	54870	52071	250487	264283	263009	302253	345957	240614	207567	116889	232183	226737	285261	193580	345380	412415	472392	414852	307427	295008	52092.4	58551.5	36703.9	62152.4	42981.4	49383.1	186761	264283	218740	302962	296870	242960	111072	67898.2	130942	156172	161204
Q91V61	2	2	113.96	4.25249e-12	4.79023	Condition 4	Condition 1	Sideroflexin-3 OS=Mus musculus GN=Sfxn3 PE=1 SV=1	104960	82944.8	73143.3	107038	60644.4	75390.8	183656	161116	177397	172119	169519	206525	189821	141930	229698	139178	200048	188599	441261	407739	367885	446887	366151	384931	83420.4	74140.9	56500.8	101759	47504.7	71499	136932	161116	147538	172523	145467	208538	101576	82444.3	129541	95863.1	113049
Q8CFI7	5	5	311.65	4.6082e-12	1.74051	Condition 3	Condition 1	D0-directed R0 polymerase II subunit RPB2 OS=Mus musculus GN=Polr2b PE=1 SV=2	189144	213303	188027	210896	193330	193850	308497	313117	302466	295601	305561	289450	369239	344667	329138	339017	321478	365141	358726	298524	288507	328489	290065	338693	150329	190663	145244	200495	151442	183843	230013	313117	251556	296294	262206	292272	197585	200209	185621	233508	181670
P55200	2	1	83.08	4.67693e-12	3.82391	Condition 2	Condition 1	Histone-lysine N-methyltransferase 2A OS=Mus musculus GN=Kmt2a PE=1 SV=3	19101.8	17773.1	32971.8	16591.3	23432.7	21131.5	83382.8	67585.9	91280.7	84114.3	105137	69440.5	83218.2	84563.5	78091.6	64891.7	80653.7	66223.6	76951.5	79985.6	77839.9	72518.7	76162.7	69183.8	15181.8	15886.6	25469.6	15773	18355.6	20040.7	62169.4	67585.9	75916.5	84311.7	90219.6	70117.5	44531.3	49121.1	44040.6	44696.1	45578.1
O55022	7	7	563.85	4.81637e-12	1.59807	Condition 4	Condition 2	Membrane-associated progesterone receptor component 1 OS=Mus musculus GN=Pgrmc1 PE=1 SV=4	2.12593e+06	2.27548e+06	2.13793e+06	2.35868e+06	2.03323e+06	2.09159e+06	1.48757e+06	1.49809e+06	1.50705e+06	1.50818e+06	1.45409e+06	1.52516e+06	2.03675e+06	2.37869e+06	1.97362e+06	2.02004e+06	2.0627e+06	1.89841e+06	2.3995e+06	2.34869e+06	2.3011e+06	2.52545e+06	2.40647e+06	2.36968e+06	1.68966e+06	2.03396e+06	1.65148e+06	2.24236e+06	1.59269e+06	1.98362e+06	1.10912e+06	1.49809e+06	1.25338e+06	1.51172e+06	1.24777e+06	1.54003e+06	1.08989e+06	1.38173e+06	1.11305e+06	1.39136e+06	1.16565e+06
Q9CQI3	6	6	455.47	5.1964e-12	1.93043	Condition 4	Condition 2	Glia maturation factor beta OS=Mus musculus GN=Gmfb PE=1 SV=3	473743	487276	532278	490752	548256	524619	446997	400009	341238	371213	366527	360547	532495	595008	522186	531485	520741	512908	663431	755801	723217	740993	781997	748551	376523	435556	411167	466550	429467	497538	333277	400009	283802	372084	314522	364063	284946	345627	294492	366077	294276
P60761	2	1	174.9	5.25446e-12	1.6592	Condition 1	Condition 3	Neurogranin OS=Mus musculus GN=Nrgn PE=1 SV=1	3.17352e+06	4.00991e+06	3.95924e+06	3.59872e+06	3.8826e+06	3.64342e+06	2.81881e+06	2.53966e+06	2.81673e+06	2.5481e+06	2.60157e+06	2.56042e+06	2.10663e+06	2.22039e+06	2.22461e+06	2.25911e+06	2.3392e+06	2.27063e+06	2.25869e+06	2.33561e+06	2.31908e+06	2.08368e+06	2.2759e+06	2.41315e+06	2.52226e+06	3.5843e+06	3.05838e+06	3.42124e+06	3.04137e+06	3.45534e+06	2.10168e+06	2.53966e+06	2.34262e+06	2.55408e+06	2.23244e+06	2.58538e+06	1.12729e+06	1.28977e+06	1.25459e+06	1.55603e+06	1.3219e+06
Q5SQX6	24	23	1863.22	5.31097e-12	1.49641	Condition 1	Condition 4	Cytoplasmic FMR1-interacting protein 2 OS=Mus musculus GN=Cyfip2 PE=1 SV=2	3.68093e+06	3.65745e+06	3.61895e+06	3.76779e+06	3.64996e+06	3.59076e+06	2.7672e+06	2.83038e+06	2.56866e+06	2.85735e+06	2.62727e+06	2.7646e+06	2.71372e+06	2.81775e+06	2.40388e+06	2.48233e+06	2.48972e+06	2.49894e+06	2.36085e+06	2.66523e+06	2.37427e+06	2.45763e+06	2.32677e+06	2.4943e+06	2.92555e+06	3.26924e+06	2.79552e+06	3.58197e+06	2.85913e+06	3.4054e+06	2.0632e+06	2.83038e+06	2.13631e+06	2.86405e+06	2.2545e+06	2.79156e+06	1.45215e+06	1.63677e+06	1.3557e+06	1.70978e+06	1.40696e+06
Q8C3F2	4	4	197.58	5.36482e-12	1.68417	Condition 3	Condition 1	Constitutive coactivator of PPAR-gamma-like protein 2 OS=Mus musculus GN=Fam120c PE=1 SV=3	250706	222353	223705	198573	235212	223483	355212	389373	347897	398233	344194	357084	373048	423114	385165	366421	376025	356646	390073	378024	367625	370326	414648	351044	199257	198752	172805	188780	184249	211947	264843	389373	289340	399167	295358	360565	199624	245778	217218	252384	212495
Q00898	1	1	26.27	5.67113e-12	2.43809	Condition 1	Condition 4	Alpha-1-antitrypsin 1-5 OS=Mus musculus GN=Serpi01e PE=1 SV=1	126565	113428	120985	121845	115146	115853	60932	56195.4	75361.1	70732.3	75984.8	70187	54016.5	60782.6	73032.6	62339.3	55500.9	58509.6	45238.2	41793.9	49842.5	52735.9	53450.7	49718.7	100592	101389	93457	115836	90197.7	109873	45430.4	56195.4	62676.5	70898.3	65203.5	70871.3	28905	35307.2	41187.5	42938.1	31364.1
Q3UQA7	2	2	86.9	5.91782e-12	2.4128	Condition 2	Condition 1	Selenoprotein H OS=Mus musculus GN=Selh PE=1 SV=2	140573	172605	136138	175614	175755	172153	385238	417254	368044	422529	364757	389443	381704	449305	362369	360605	378626	362136	288445	320061	300195	344126	347453	427899	111725	154284	105162	166954	137675	163266	287230	417254	306096	423521	313003	393240	204255	260991	204362	248378	213965
P16330	40	39	3208	6.07758e-12	1.26143	Condition 1	Condition 4	2',3'-cyclic-nucleotide 3'-phosphodiesterase OS=Mus musculus GN=Cnp PE=1 SV=3	2.70948e+07	2.83342e+07	2.8065e+07	2.66418e+07	2.70553e+07	2.62095e+07	2.66794e+07	2.6631e+07	2.60357e+07	2.82093e+07	2.67191e+07	2.71754e+07	2.48607e+07	2.53529e+07	2.36893e+07	2.44713e+07	2.42273e+07	2.33155e+07	2.23576e+07	2.15678e+07	2.14346e+07	2.09986e+07	2.15583e+07	2.16194e+07	2.15345e+07	2.53268e+07	2.16793e+07	2.53279e+07	2.11933e+07	2.48565e+07	1.98919e+07	2.6631e+07	2.16534e+07	2.82755e+07	2.2928e+07	2.74404e+07	1.33033e+07	1.47269e+07	1.33598e+07	1.68553e+07	1.3691e+07
P20152	1	1	32.71	6.08757e-12	2.12134	Condition 3	Condition 1	Vimentin OS=Mus musculus GN=Vim PE=1 SV=3	151616	148494	112779	136557	121385	142380	192695	151956	181402	161213	153409	186661	266944	322526	281518	296111	271226	286774	254760	295877	265758	291381	248791	277578	120502	132733	87118.1	129823	95084.6	135030	143671	151956	150869	161592	131643	188481	142845	187348	158765	203955	153272
Q8K0S0	10	10	564	6.33582e-12	1.50316	Condition 1	Condition 3	Phytanoyl-CoA hydroxylase-interacting protein OS=Mus musculus GN=Phyhip PE=1 SV=1	1.96502e+06	2.13655e+06	1.99421e+06	2.14042e+06	1.85768e+06	1.92355e+06	1.37951e+06	1.50288e+06	1.40444e+06	1.52803e+06	1.43217e+06	1.47493e+06	1.25647e+06	1.33358e+06	1.31131e+06	1.3197e+06	1.44967e+06	1.32404e+06	1.42667e+06	1.46509e+06	1.39967e+06	1.50922e+06	1.36035e+06	1.38367e+06	1.56177e+06	1.90978e+06	1.54046e+06	2.03486e+06	1.45518e+06	1.82425e+06	1.02855e+06	1.50288e+06	1.16804e+06	1.53161e+06	1.22896e+06	1.48931e+06	672358	774646	739526	908985	819220
P47962	2	2	79.47	6.53422e-12	3.94125	Condition 1	Condition 2	60S ribosomal protein L5 OS=Mus musculus GN=Rpl5 PE=1 SV=3	362732	408646	342933	338727	359274	335149	93353.6	105319	79518	88766.3	91707	86204.1	154288	138529	106315	101752	134504	126463	97768.3	101291	51913.4	97280.6	92681.4	105508	288294	365272	264905	322022	281431	317848	69603.6	105319	66133.7	88974.7	78695	87044.6	82561.7	80468.6	59957.7	70084.5	76009.7
P62984	8	6	487.71	7.04981e-12	1.51039	Condition 4	Condition 1	Ubiquitin-60S ribosomal protein L40 OS=Mus musculus GN=Uba52 PE=1 SV=2	1.89708e+06	2.06696e+06	2.01335e+06	2.06292e+06	2.03117e+06	1.97415e+06	2.95249e+06	3.15769e+06	2.8799e+06	3.03704e+06	2.78226e+06	2.80537e+06	2.91542e+06	3.37297e+06	2.77855e+06	3.03908e+06	3.05515e+06	2.82269e+06	2.92175e+06	3.05946e+06	2.86873e+06	2.98388e+06	3.2375e+06	3.12227e+06	1.50777e+06	1.84757e+06	1.55525e+06	1.96118e+06	1.59108e+06	1.87225e+06	2.20135e+06	3.15769e+06	2.39516e+06	3.04417e+06	2.38749e+06	2.83272e+06	1.56008e+06	1.95928e+06	1.56699e+06	2.09326e+06	1.72649e+06
Q8C2Q3	14	13	931.76	7.32203e-12	1.57267	Condition 3	Condition 1	R0-binding protein 14 OS=Mus musculus GN=Rbm14 PE=1 SV=1	1.59214e+06	1.76077e+06	1.58841e+06	1.5471e+06	1.46027e+06	1.57509e+06	2.13383e+06	2.23237e+06	2.19578e+06	2.25823e+06	2.13891e+06	2.17236e+06	2.41697e+06	2.8554e+06	2.44561e+06	2.35685e+06	2.52405e+06	2.37883e+06	2.28929e+06	2.35444e+06	2.45884e+06	2.54337e+06	2.34001e+06	2.53477e+06	1.26541e+06	1.57388e+06	1.22699e+06	1.4708e+06	1.14388e+06	1.49378e+06	1.59097e+06	2.23237e+06	1.82619e+06	2.26353e+06	1.83543e+06	2.19354e+06	1.29336e+06	1.65864e+06	1.37923e+06	1.62336e+06	1.42636e+06
Q61704	3	3	178.93	7.35989e-12	1.97048	Condition 4	Condition 2	Inter-alpha-trypsin inhibitor heavy chain H3 OS=Mus musculus GN=Itih3 PE=1 SV=3	274216	306123	279796	290303	269025	277352	185378	220096	194422	202833	178343	211150	367987	382846	340704	364901	302145	318143	399123	424213	429430	371754	360498	364230	217942	273631	216133	275986	210736	263035	138216	220096	161697	203309	153039	213209	196915	222387	192143	251337	170745
P14869	4	4	201.39	8.02025e-12	2.35861	Condition 1	Condition 2	60S acidic ribosomal protein P0 OS=Mus musculus GN=Rplp0 PE=1 SV=3	401475	409726	427870	415773	429992	448312	190039	211630	171886	166039	181830	152574	293405	328174	244854	223458	278738	255823	228466	248834	231138	226531	233427	230883	319086	366238	330515	395269	336827	425170	141691	211630	142955	166429	156031	154062	157005	190629	138088	153913	157517
P17156	12	11	859.09	8.15503e-12	1.49587	Condition 4	Condition 2	Heat shock-related 70 kDa protein 2 OS=Mus musculus GN=Hspa2 PE=1 SV=2	1.92389e+06	1.79103e+06	2.01035e+06	1.84892e+06	1.87103e+06	1.80373e+06	1.53922e+06	1.58041e+06	1.58181e+06	1.52679e+06	1.53141e+06	1.65414e+06	2.20437e+06	1.88442e+06	2.12679e+06	2.15736e+06	2.15235e+06	1.99824e+06	2.3927e+06	2.25326e+06	2.37849e+06	2.37426e+06	2.45433e+06	2.22872e+06	1.52908e+06	1.60093e+06	1.55293e+06	1.75774e+06	1.46564e+06	1.71062e+06	1.14763e+06	1.58041e+06	1.31557e+06	1.53038e+06	1.31412e+06	1.67026e+06	1.17959e+06	1.09462e+06	1.19943e+06	1.48595e+06	1.21631e+06
Q569Z6	3	3	112.04	8.52807e-12	2.8432	Condition 1	Condition 4	Thyroid hormone receptor-associated protein 3 OS=Mus musculus GN=Thrap3 PE=1 SV=1	268545	289088	247605	265571	268254	255247	154087	161072	137725	175784	166915	182873	137587	166118	159604	156549	117495	131499	101682	107469	102758	75175.3	85440.4	88221.3	213435	258404	191267	252474	210132	242070	114886	161072	114544	176196	143232	184656	73624.9	96494.3	90010.3	107828	66397.7
Q9D287	9	9	651.8	8.83338e-12	1.49245	Condition 3	Condition 1	Pre-mR0-splicing factor SPF27 OS=Mus musculus GN=Bcas2 PE=1 SV=1	954958	951008	972787	1.01131e+06	905312	977311	1.28623e+06	1.30659e+06	1.30453e+06	1.24182e+06	1.32961e+06	1.32435e+06	1.46683e+06	1.6345e+06	1.34637e+06	1.38821e+06	1.41086e+06	1.36867e+06	1.38099e+06	1.3332e+06	1.25462e+06	1.32982e+06	1.31604e+06	1.28054e+06	758986	850067	751446	961435	709160	926861	958998	1.30659e+06	1.08496e+06	1.24473e+06	1.14096e+06	1.33726e+06	784922	949445	759299	956170	797290
P56212	4	4	200.9	9.11238e-12	1.64469	Condition 1	Condition 4	cAMP-regulated phosphoprotein 19 OS=Mus musculus GN=Arpp19 PE=1 SV=2	1.89998e+06	1.91758e+06	1.7532e+06	1.60865e+06	1.71061e+06	1.78821e+06	1.24353e+06	1.21062e+06	1.2159e+06	1.20278e+06	1.28898e+06	1.27325e+06	1.20915e+06	1.12367e+06	1.16228e+06	1.212e+06	1.1983e+06	1.04863e+06	1.12982e+06	1.05297e+06	1.21852e+06	1.02551e+06	1.02599e+06	1.03972e+06	1.51007e+06	1.71405e+06	1.35429e+06	1.52931e+06	1.33997e+06	1.6959e+06	927162	1.21062e+06	1.01125e+06	1.2056e+06	1.10609e+06	1.28567e+06	647032	652714	655481	834802	677171
Q9ESX5	7	7	335.61	9.15013e-12	1.61756	Condition 4	Condition 1	H/ACA ribonucleoprotein complex subunit 4 OS=Mus musculus GN=Dkc1 PE=1 SV=4	615299	594593	630880	637633	605260	574861	834809	888544	820711	955506	822783	802036	960365	851785	948367	917531	976239	983695	959002	981425	947695	974935	1.11359e+06	941233	489030	531482	487334	606187	474120	545186	622426	888544	682571	957749	706041	809856	513905	494783	534842	631978	551682
Q9JIS5	9	9	559.58	9.31522e-12	1.5898	Condition 4	Condition 2	Sy0ptic vesicle glycoprotein 2A OS=Mus musculus GN=Sv2a PE=1 SV=1	1.70739e+06	1.66791e+06	1.71566e+06	1.54216e+06	1.52032e+06	1.62455e+06	1.20045e+06	1.14807e+06	1.13716e+06	1.16483e+06	1.17702e+06	993522	1.27661e+06	1.30458e+06	1.18959e+06	1.0954e+06	1.26863e+06	1.19501e+06	1.90142e+06	1.72359e+06	1.84174e+06	1.81846e+06	1.86242e+06	1.69645e+06	1.35701e+06	1.49088e+06	1.32529e+06	1.46611e+06	1.19092e+06	1.54069e+06	895043	1.14807e+06	945756	1.16756e+06	1.01001e+06	1.00321e+06	683134	757801	670880	754492	716914
Q60668	18	17	1717.69	9.31533e-12	1.39886	Condition 4	Condition 1	Heterogeneous nuclear ribonucleoprotein D0 OS=Mus musculus GN=Hnrnpd PE=1 SV=2	1.94027e+07	2.13108e+07	1.97494e+07	2.13952e+07	1.97805e+07	2.01436e+07	2.40005e+07	2.35047e+07	2.25525e+07	2.34112e+07	2.31609e+07	2.37185e+07	2.938e+07	3.11964e+07	2.56208e+07	2.71004e+07	2.83681e+07	2.8083e+07	2.82614e+07	2.81667e+07	2.84323e+07	2.76168e+07	2.91622e+07	2.87168e+07	1.54209e+07	1.90488e+07	1.52557e+07	2.034e+07	1.54947e+07	1.91038e+07	1.78946e+07	2.35047e+07	1.87565e+07	2.34661e+07	1.98746e+07	2.39498e+07	1.57217e+07	1.81213e+07	1.44491e+07	1.86662e+07	1.60311e+07
P63054	4	4	521.11	9.52805e-12	1.32622	Condition 1	Condition 3	Purkinje cell protein 4 OS=Mus musculus GN=Pcp4 PE=3 SV=2	7.95943e+06	9.01613e+06	8.44163e+06	8.37224e+06	7.98041e+06	8.23483e+06	7.25443e+06	7.08162e+06	6.98376e+06	7.33032e+06	7.31393e+06	7.04394e+06	6.21736e+06	6.81177e+06	6.1649e+06	6.35656e+06	5.97972e+06	6.17426e+06	6.31465e+06	6.10268e+06	6.33536e+06	6.28272e+06	6.44468e+06	6.26589e+06	6.32603e+06	8.05915e+06	6.52088e+06	7.95935e+06	6.25131e+06	7.80974e+06	5.40884e+06	7.08162e+06	5.80827e+06	7.34752e+06	6.27618e+06	7.11261e+06	3.327e+06	3.95681e+06	3.47676e+06	4.37827e+06	3.3792e+06
Q99JF8	31	29	2599.48	9.86888e-12	1.39624	Condition 3	Condition 1	PC4 and SFRS1-interacting protein OS=Mus musculus GN=Psip1 PE=1 SV=1	1.01653e+07	1.01832e+07	9.99156e+06	9.95933e+06	9.52874e+06	1.03296e+07	1.2906e+07	1.25625e+07	1.31923e+07	1.34592e+07	1.28659e+07	1.34871e+07	1.31276e+07	1.55352e+07	1.36021e+07	1.37029e+07	1.38855e+07	1.41415e+07	1.27626e+07	1.3755e+07	1.3014e+07	1.32812e+07	1.25968e+07	1.33905e+07	8.07921e+06	9.10234e+06	7.71815e+06	9.46817e+06	7.46417e+06	9.79638e+06	9.62259e+06	1.25625e+07	1.09718e+07	1.34908e+07	1.10404e+07	1.36186e+07	7.02477e+06	9.02406e+06	7.67103e+06	9.43831e+06	7.8468e+06
P62281	7	5	399.66	9.95215e-12	1.8085	Condition 1	Condition 2	40S ribosomal protein S11 OS=Mus musculus GN=Rps11 PE=1 SV=3	1.012e+06	980855	956044	970785	893648	957237	579127	531125	487065	516769	557307	519411	604050	674217	543533	672555	604258	626108	610998	710366	589588	674970	627032	686290	804320	876746	738512	922909	700024	907823	431792	531125	405084	517981	478233	524475	323236	391638	306531	463243	341472
P01942	9	9	1109.09	1.00009e-11	1.46199	Condition 1	Condition 2	Hemoglobin subunit alpha OS=Mus musculus GN=Hba PE=1 SV=2	1.78099e+08	1.816e+08	1.69023e+08	1.77531e+08	1.66623e+08	1.76898e+08	1.23381e+08	1.20691e+08	1.15866e+08	1.14755e+08	1.24311e+08	1.19041e+08	1.66498e+08	1.50752e+08	1.48607e+08	1.50812e+08	1.5635e+08	1.45168e+08	1.46147e+08	1.4857e+08	1.56888e+08	1.40394e+08	1.37309e+08	1.47844e+08	1.4155e+08	1.62325e+08	1.30565e+08	1.68776e+08	1.30521e+08	1.67766e+08	9.19921e+07	1.20691e+08	9.63635e+07	1.15024e+08	1.06673e+08	1.20202e+08	8.90954e+07	8.75685e+07	8.38083e+07	1.03877e+08	8.83547e+07
Q9CZ13	9	9	815.11	1.01475e-11	3.04422	Condition 4	Condition 1	Cytochrome b-c1 complex subunit 1, mitochondrial OS=Mus musculus GN=Uqcrc1 PE=1 SV=2	849160	730492	813284	954878	1.00128e+06	751091	1.78772e+06	2.00413e+06	1.93155e+06	3.14382e+06	1.95204e+06	1.94534e+06	1.83491e+06	1.80933e+06	1.68778e+06	2.0105e+06	1.60685e+06	1.7103e+06	2.57363e+06	2.53921e+06	2.5909e+06	2.61263e+06	2.6245e+06	2.58522e+06	674899	652957	628235	907787	784332	712319	1.33291e+06	2.00413e+06	1.60643e+06	3.1512e+06	1.67507e+06	1.96431e+06	981887	1.051e+06	951840	1.38479e+06	908043
Q9D4H9	1	1	50.2	1.03001e-11	1.8643	Condition 4	Condition 1	PHD finger protein 14 OS=Mus musculus GN=Phf14 PE=1 SV=1	55480.2	67821.5	72386.9	70135.9	70653.8	69045.7	84082	93048	99122.5	95904.6	86645.8	91140.2	112712	107875	116460	121209	125204	127571	113857	138389	121184	127209	131775	123605	44094.8	60622.8	55916.5	66677	55345.4	65481.5	62690.8	93048	82438.4	96129.7	74351.9	92028.8	60313.9	62662.2	65678.6	83486.3	70754.1
Q9QXV0	9	9	811.52	1.06032e-11	1.37541	Condition 4	Condition 2	ProSAAS OS=Mus musculus GN=Pcsk1n PE=1 SV=2	3.42002e+06	3.45175e+06	3.24091e+06	3.44359e+06	3.32644e+06	3.32219e+06	2.90857e+06	2.96267e+06	3.17425e+06	3.09808e+06	3.2876e+06	3.20143e+06	4.41321e+06	4.19696e+06	4.09024e+06	3.82449e+06	3.95143e+06	4.01493e+06	4.26122e+06	4.31302e+06	4.34158e+06	4.42573e+06	4.03579e+06	4.25012e+06	2.71818e+06	3.08538e+06	2.5035e+06	3.27376e+06	2.60571e+06	3.15069e+06	2.1686e+06	2.96267e+06	2.63997e+06	3.10535e+06	2.82113e+06	3.23265e+06	2.36157e+06	2.43792e+06	2.30673e+06	2.63423e+06	2.23299e+06
Q9WVR4	5	5	385.11	1.07585e-11	1.62352	Condition 3	Condition 1	Fragile X mental retardation syndrome-related protein 2 OS=Mus musculus GN=Fxr2 PE=1 SV=1	685308	685110	667887	725281	690290	618133	950916	1.04619e+06	978814	1.10955e+06	1.08209e+06	1.0472e+06	1.09072e+06	1.27242e+06	1.03668e+06	1.09304e+06	1.05147e+06	1.06667e+06	1.01556e+06	1.09857e+06	1.05131e+06	1.07281e+06	973955	1.08057e+06	544672	612392	515921	689513	540727	586224	708994	1.04619e+06	814063	1.11216e+06	928553	1.05741e+06	583662	739119	584646	752864	594195
Q9Z1B3	53	50	4500.98	1.19731e-11	1.48677	Condition 2	Condition 3	1-phosphatidylinositol 4,5-bisphosphate phosphodiesterase beta-1 OS=Mus musculus GN=Plcb1 PE=1 SV=2	7.78194e+06	7.53211e+06	8.12594e+06	8.47728e+06	8.80432e+06	8.08166e+06	8.13252e+06	7.94993e+06	8.97314e+06	8.42814e+06	8.91606e+06	7.89481e+06	5.79036e+06	5.12312e+06	5.89148e+06	5.52459e+06	5.95907e+06	5.53941e+06	6.21979e+06	5.76826e+06	6.16455e+06	5.65635e+06	6.17311e+06	5.58792e+06	6.18497e+06	6.73265e+06	6.27702e+06	8.05921e+06	6.89671e+06	7.66447e+06	6.06353e+06	7.94993e+06	7.4628e+06	8.44792e+06	7.65099e+06	7.97178e+06	3.0985e+06	2.97591e+06	3.32256e+06	3.80523e+06	3.36752e+06
Q9R0P9	8	8	1155.57	1.241e-11	1.48138	Condition 1	Condition 2	Ubiquitin carboxyl-termi0l hydrolase isozyme L1 OS=Mus musculus GN=Uchl1 PE=1 SV=1	2.76675e+07	2.67262e+07	2.73556e+07	2.94239e+07	2.65606e+07	2.81897e+07	1.84364e+07	1.85209e+07	1.86862e+07	1.91393e+07	1.80046e+07	1.92187e+07	2.3406e+07	2.5471e+07	2.18039e+07	2.20095e+07	2.42023e+07	2.20756e+07	2.30305e+07	2.33518e+07	2.30621e+07	2.25645e+07	2.29624e+07	2.1221e+07	2.19897e+07	2.38894e+07	2.11313e+07	2.79728e+07	2.08058e+07	2.67345e+07	1.3746e+07	1.85209e+07	1.55409e+07	1.91842e+07	1.545e+07	1.94061e+07	1.25249e+07	1.47955e+07	1.22965e+07	1.51597e+07	1.36769e+07
Q9JL35	2	2	67.77	1.25615e-11	1.46016	Condition 3	Condition 1	High mobility group nucleosome-binding domain-containing protein 5 OS=Mus musculus GN=Hmgn5 PE=1 SV=2	805484	809134	796642	845311	838724	764997	1.10458e+06	1.21058e+06	1.07303e+06	1.22293e+06	1.09847e+06	1.06252e+06	1.23166e+06	1.29097e+06	1.1223e+06	1.15954e+06	1.14707e+06	1.14528e+06	948091	935691	934707	895553	890786	931270	640186	723252	615379	803623	657000	725507	823564	1.21058e+06	892421	1.2258e+06	942610	1.07288e+06	659077	749896	632936	798672	648220
Q9JJV2	9	8	639.45	1.34136e-11	1.63774	Condition 1	Condition 2	Profilin-2 OS=Mus musculus GN=Pfn2 PE=1 SV=3	2.12749e+06	2.08958e+06	1.80639e+06	2.04114e+06	2.04709e+06	2.14504e+06	1.21527e+06	1.29382e+06	1.26028e+06	1.21416e+06	1.2466e+06	1.2538e+06	1.51001e+06	1.37076e+06	1.38388e+06	1.44556e+06	1.30071e+06	1.64461e+06	1.65299e+06	1.85363e+06	1.704e+06	1.70698e+06	1.72265e+06	1.76631e+06	1.6909e+06	1.86779e+06	1.39538e+06	1.94048e+06	1.60355e+06	2.03431e+06	906094	1.29382e+06	1.04815e+06	1.21701e+06	1.06973e+06	1.26602e+06	808026	796247	780454	995673	735045
Q8BMK4	4	4	211.17	1.4256e-11	1.80072	Condition 2	Condition 1	Cytoskeleton-associated protein 4 OS=Mus musculus GN=Ckap4 PE=1 SV=2	217609	196772	207359	233305	199868	220715	372379	413004	368143	407373	381679	354473	369308	428321	342780	400988	355348	373882	314482	353337	286457	304362	329603	351467	172952	175887	160178	221799	156563	209322	277643	413004	306178	408330	327523	357929	197622	248802	193314	276193	200810
P14148	5	5	232.79	1.43358e-11	14.9847	Condition 1	Condition 3	60S ribosomal protein L7 OS=Mus musculus GN=Rpl7 PE=1 SV=2	490578	393238	224514	264590	509038	496159	46034.3	42560.6	64964.3	49215	48706.8	47789.8	22640.9	16732	21488.7	34854	36157.2	26830.5	44586.9	19181.6	38808.7	25089.3	52333.2	53664.8	389904	351500	173430	251541	398746	470547	34322.8	42560.6	54029.7	49330.5	41796	48255.7	12115.5	9719.24	12118.8	24006.7	20432.8
P60840	3	3	114.12	1.52817e-11	1.40559	Condition 1	Condition 2	Alpha-endosulfine OS=Mus musculus GN=Ensa PE=1 SV=1	958867	1.02813e+06	963431	950625	910382	997171	697833	734445	682279	702080	636218	679637	730204	773422	704146	753069	778178	762859	760306	751228	789022	776543	739531	747334	762093	918999	744218	903744	713132	945695	520298	734445	567440	703728	545947	686263	390743	449264	397110	518699	439755
P42669	18	18	1756.45	1.56298e-11	1.25375	Condition 3	Condition 2	Transcriptio0l activator protein Pur-alpha OS=Mus musculus GN=Pura PE=1 SV=1	1.53048e+07	1.58503e+07	1.58785e+07	1.61029e+07	1.5009e+07	1.52402e+07	1.43427e+07	1.38687e+07	1.40676e+07	1.40479e+07	1.35238e+07	1.4056e+07	1.84678e+07	1.80027e+07	1.70704e+07	1.68763e+07	1.77428e+07	1.70377e+07	1.37463e+07	1.42663e+07	1.43864e+07	1.442e+07	1.47152e+07	1.41956e+07	1.2164e+07	1.41679e+07	1.22656e+07	1.53087e+07	1.1757e+07	1.44535e+07	1.06938e+07	1.38687e+07	1.16997e+07	1.40808e+07	1.1605e+07	1.4193e+07	9.88238e+06	1.04574e+07	9.62703e+06	1.16241e+07	1.00266e+07
P11499	37	34	3264.38	1.64551e-11	1.32347	Condition 1	Condition 3	Heat shock protein HSP 90-beta OS=Mus musculus GN=Hsp90ab1 PE=1 SV=3	1.61978e+07	1.61442e+07	1.54753e+07	1.63651e+07	1.59241e+07	1.53718e+07	1.23981e+07	1.23794e+07	1.20183e+07	1.2792e+07	1.24999e+07	1.26645e+07	1.22078e+07	1.26909e+07	1.20346e+07	1.12277e+07	1.19223e+07	1.20593e+07	1.2862e+07	1.21586e+07	1.30861e+07	1.28692e+07	1.16078e+07	1.26451e+07	1.28738e+07	1.44306e+07	1.19542e+07	1.55581e+07	1.24739e+07	1.45783e+07	9.24391e+06	1.23794e+07	9.9954e+06	1.28221e+07	1.07264e+07	1.2788e+07	6.53259e+06	7.37185e+06	6.78705e+06	7.73345e+06	6.73743e+06
Q6ZWV7	3	2	107.96	1.86715e-11	1.97968	Condition 1	Condition 2	60S ribosomal protein L35 OS=Mus musculus GN=Rpl35 PE=1 SV=1	262532	359922	301619	334792	277965	283730	151021	162607	147569	170120	153408	134899	159906	187694	167889	174056	154682	184978	159407	167535	140524	148524	155191	150583	208656	321720	232991	318281	217739	269084	112600	162607	122731	170519	131641	136214	85568	109027	94682.5	119886	87412.3
Q8VDP4	10	10	537.79	1.92614e-11	1.39309	Condition 4	Condition 1	Cell cycle and apoptosis regulator protein 2 OS=Mus musculus GN=Ccar2 PE=1 SV=2	702704	757041	716418	749012	773271	658455	799226	692907	716799	758900	714582	699788	1.05798e+06	1.01857e+06	1.01853e+06	938359	1.02653e+06	958838	1.00415e+06	1.01901e+06	1.03883e+06	945083	996761	1.06574e+06	558498	676688	553409	712073	605729	624464	595895	692907	596149	760681	613193	706611	566138	591668	574409	646323	580103
P22752	6	6	644.34	2.02877e-11	4.00122	Condition 4	Condition 1	Histone H2A type 1 OS=Mus musculus GN=Hist1h2ab PE=1 SV=3	1.69291e+08	1.62293e+08	1.82568e+08	1.67933e+08	1.95513e+08	1.53805e+08	6.1561e+08	5.96306e+08	6.37178e+08	6.56384e+08	5.92172e+08	6.19351e+08	6.43061e+08	2.86703e+08	5.9275e+08	5.50341e+08	7.17873e+08	5.75484e+08	6.45014e+08	7.36259e+08	7.6813e+08	7.01992e+08	6.62771e+08	6.12707e+08	1.3455e+08	1.45067e+08	1.41027e+08	1.59652e+08	1.53151e+08	1.45866e+08	4.58993e+08	5.96306e+08	5.2993e+08	6.57924e+08	5.08151e+08	6.2539e+08	3.44112e+08	1.6654e+08	3.34288e+08	3.79064e+08	4.05676e+08
P62320	3	3	175.95	2.06165e-11	1.43189	Condition 4	Condition 1	Small nuclear ribonucleoprotein Sm D3 OS=Mus musculus GN=Snrpd3 PE=1 SV=1	1.12839e+06	1.16594e+06	1.22429e+06	1.13781e+06	1.03014e+06	1.16125e+06	1.64692e+06	1.49866e+06	1.68183e+06	1.64415e+06	1.57201e+06	1.69154e+06	1.73719e+06	1.48695e+06	1.65781e+06	1.56833e+06	1.71158e+06	1.61624e+06	1.66833e+06	1.65124e+06	1.6576e+06	1.56371e+06	1.63193e+06	1.6325e+06	896829	1.04219e+06	945724	1.08169e+06	806943	1.10131e+06	1.22793e+06	1.49866e+06	1.39875e+06	1.648e+06	1.34897e+06	1.70803e+06	929596	863737	934937	1.08024e+06	967230
Q9JIY5	5	5	207.66	2.28708e-11	1.27389	Condition 4	Condition 1	Serine protease HTRA2, mitochondrial OS=Mus musculus GN=Htra2 PE=1 SV=2	458526	441238	469614	472202	450442	453301	488477	467720	434881	457968	450069	449725	582255	519057	529615	553572	545631	544409	572045	605424	598332	575019	579719	566698	364429	394405	362761	448915	352846	429901	364204	467720	361683	459043	386210	454110	311573	301509	298682	381289	308341
Q811P8	3	3	119.03	2.28795e-11	1.32183	Condition 1	Condition 3	Rho GTPase-activating protein 32 OS=Mus musculus GN=Arhgap32 PE=1 SV=2	103664	105642	108388	104420	106626	104601	106575	100468	103153	105625	100272	106775	86676.4	73466.2	78588.8	79882.5	77155.7	83370.8	102192	101498	105612	100335	108281	106587	82390.4	94428.6	83726.2	99270.4	83523.8	99201.2	79461.6	100468	85790.7	105872	86044.5	107816	46381.8	42674.9	44321	55021.6	43601.4
P62911	2	2	76.15	2.33628e-11	7.55327	Condition 1	Condition 4	60S ribosomal protein L32 OS=Mus musculus GN=Rpl32 PE=1 SV=2	143399	190768	123088	131264	145034	127048	28524.6	43223.9	30512.7	27013	27001.2	22344.8	49358.3	43097.9	28930.6	22284.5	52752.7	33354.6	22356.9	23082.9	15074.4	15836.4	15719.9	21866.7	113971	170520	95081.4	124790	113610	120490	21267.7	43223.9	25376.8	27076.4	23170.1	22562.7	26412.4	25034.6	16315.7	15349.1	29811
Q9CR68	8	7	492.1	2.34293e-11	3.05406	Condition 4	Condition 1	Cytochrome b-c1 complex subunit Rieske, mitochondrial OS=Mus musculus GN=Uqcrfs1 PE=1 SV=1	895899	832799	582754	645431	957358	1.07983e+06	1.99234e+06	1.87292e+06	2.23802e+06	2.09162e+06	1.89732e+06	1.85147e+06	1.59105e+06	1.4125e+06	1.70273e+06	1.71071e+06	1.60832e+06	1.44745e+06	2.40091e+06	2.48129e+06	2.72926e+06	2.62182e+06	2.61285e+06	2.40609e+06	712046	744405	450158	613601	749930	1.02409e+06	1.48547e+06	1.87292e+06	1.86132e+06	2.09653e+06	1.62811e+06	1.86953e+06	851391	820491	960273	1.1783e+06	908874
P48771	1	1	44.77	2.36388e-11	2.65867	Condition 4	Condition 1	Cytochrome c oxidase subunit 7A2, mitochondrial OS=Mus musculus GN=Cox7a2 PE=1 SV=2	328251	292250	294046	322304	240784	359173	702060	611480	667585	677870	585831	592445	714946	598171	497900	530127	536504	532475	740893	917905	721535	764971	891907	846253	260889	261231	227141	306409	188614	340632	523449	611480	555219	679461	502710	598221	382578	347464	280796	365141	303183
Q9D394	16	16	946.81	2.40391e-11	1.35863	Condition 1	Condition 2	Protein RUFY3 OS=Mus musculus GN=Rufy3 PE=1 SV=1	1.40278e+06	1.49998e+06	1.40003e+06	1.36081e+06	1.38403e+06	1.41435e+06	1.04817e+06	1.11497e+06	981050	1.06041e+06	1.02751e+06	996196	1.15487e+06	1.0161e+06	995501	1.00811e+06	1.07183e+06	1.02811e+06	1.08163e+06	1.06611e+06	1.0254e+06	1.06296e+06	1.0409e+06	1.0567e+06	1.11491e+06	1.34077e+06	1.08148e+06	1.2937e+06	1.08415e+06	1.34134e+06	781509	1.11497e+06	815922	1.0629e+06	881717	1.00591e+06	617990	590229	561423	694363	605700
Q61142	5	5	215.01	2.4525e-11	1.4913	Condition 4	Condition 1	Spindlin-1 OS=Mus musculus GN=Spin1 PE=1 SV=2	523370	514588	528034	504357	524666	461696	696506	662789	665502	682018	692244	659539	809889	727733	803992	726971	755930	718281	759277	805147	815885	679876	770520	727763	415967	459969	407888	479483	410988	437862	519308	662789	553486	683619	594024	665969	433384	422724	453420	500724	427183
P62849	4	4	212.88	2.46061e-11	1.83696	Condition 1	Condition 2	40S ribosomal protein S24 OS=Mus musculus GN=Rps24 PE=1 SV=1	1.00227e+06	884261	1.05588e+06	1.06509e+06	968912	951392	598006	511477	533141	540216	535488	508626	601629	454588	527152	510183	619181	515421	651030	693358	680073	679377	644106	592842	796585	790405	815631	1.01256e+06	758980	902280	445868	511477	443404	541484	459509	513585	321940	264060	297293	351404	349905
P99027	2	2	382.99	2.63924e-11	1.84526	Condition 1	Condition 4	60S acidic ribosomal protein P2 OS=Mus musculus GN=Rplp2 PE=1 SV=3	3.86618e+06	4.05415e+06	4.19536e+06	4.07207e+06	4.67646e+06	3.95514e+06	2.62138e+06	2.41949e+06	2.64801e+06	3.22952e+06	2.44762e+06	2.69173e+06	2.90891e+06	2.74981e+06	2.62974e+06	2.65612e+06	2.48001e+06	2.48879e+06	2.32969e+06	2.21278e+06	2.10998e+06	2.18277e+06	2.33725e+06	2.27788e+06	3.07278e+06	3.62384e+06	3.24077e+06	3.87125e+06	3.66323e+06	3.75097e+06	1.95448e+06	2.41949e+06	2.2023e+06	3.2371e+06	2.10034e+06	2.71798e+06	1.5566e+06	1.5973e+06	1.48307e+06	1.82948e+06	1.40148e+06
Q61644	38	37	3316.79	2.64678e-11	1.33083	Condition 1	Condition 3	Protein ki0se C and casein ki0se substrate in neurons protein 1 OS=Mus musculus GN=Pacsin1 PE=1 SV=1	3.19697e+07	3.3456e+07	3.28012e+07	3.19022e+07	3.2244e+07	3.18296e+07	2.93841e+07	2.64013e+07	2.69368e+07	2.80203e+07	2.6431e+07	2.73311e+07	2.50797e+07	2.50383e+07	2.29199e+07	2.42707e+07	2.43701e+07	2.42475e+07	2.71603e+07	2.58028e+07	2.79441e+07	2.56522e+07	2.57798e+07	2.60226e+07	2.5409e+07	2.99049e+07	2.53378e+07	3.03289e+07	2.52578e+07	3.01865e+07	2.19085e+07	2.64013e+07	2.24028e+07	2.8086e+07	2.26808e+07	2.75975e+07	1.34205e+07	1.45442e+07	1.29259e+07	1.67172e+07	1.37718e+07
P97461	8	8	570.46	2.68116e-11	2.45157	Condition 1	Condition 3	40S ribosomal protein S5 OS=Mus musculus GN=Rps5 PE=1 SV=3	795544	766189	926970	812133	953757	790249	520075	451899	505202	429955	449371	485320	379785	267362	360662	321677	364435	363879	429196	414385	463398	390702	481858	349908	632286	684865	716054	772081	747109	749456	387763	451899	420168	430964	385611	490052	203228	155305	203399	221565	205945
Q99KG3	4	4	170.11	2.74585e-11	1.58613	Condition 4	Condition 1	R0-binding protein 10 OS=Mus musculus GN=Rbm10 PE=1 SV=1	202201	219612	205351	208607	207221	203931	297478	266622	283632	287215	271127	275677	270916	299672	268909	306553	250448	295959	331820	358836	310348	321739	320320	334717	160706	196302	158626	198319	162323	193404	221797	266622	235891	287889	232658	278365	144971	174073	151654	211148	141531
P28659	9	9	730.56	2.77302e-11	1.57708	Condition 4	Condition 1	CUGBP Elav-like family member 1 OS=Mus musculus GN=Celf1 PE=1 SV=2	895779	974946	904826	907145	943407	918658	1.3902e+06	1.37293e+06	1.46336e+06	1.33317e+06	1.4036e+06	1.30357e+06	1.41907e+06	1.31656e+06	1.2987e+06	1.45951e+06	1.45783e+06	1.47186e+06	1.3567e+06	1.62001e+06	1.29995e+06	1.48585e+06	1.39079e+06	1.59123e+06	711951	871464	698948	862407	739001	871235	1.03652e+06	1.37293e+06	1.21705e+06	1.3363e+06	1.20444e+06	1.31628e+06	759365	764763	732418	1.00528e+06	823832
Q9JIX8	7	7	256.79	3.01962e-11	1.71757	Condition 3	Condition 1	Apoptotic chromatin condensation inducer in the nucleus OS=Mus musculus GN=Acin1 PE=1 SV=3	221627	250247	203934	228427	220971	247036	287745	314230	300671	320034	306617	354389	422745	362959	401774	388557	393603	387281	289558	280784	271742	291463	285326	256784	176146	223686	157532	217162	173094	234284	214540	314230	250063	320785	263112	357844	226217	210835	226585	267631	222428
P62259	13	13	1209.72	3.13545e-11	1.37444	Condition 1	Condition 2	14-3-3 protein epsilon OS=Mus musculus GN=Ywhae PE=1 SV=1	6.99116e+06	7.1183e+06	6.78124e+06	7.2001e+06	6.34352e+06	6.58256e+06	4.81303e+06	5.14653e+06	5.05419e+06	5.18142e+06	4.69921e+06	4.94827e+06	5.74954e+06	6.20674e+06	5.922e+06	6.29249e+06	6.1027e+06	6.20298e+06	6.45721e+06	6.67811e+06	6.20513e+06	6.47982e+06	6.23365e+06	6.39101e+06	5.55647e+06	6.36276e+06	5.23828e+06	6.84502e+06	4.96909e+06	6.24276e+06	3.58855e+06	5.14653e+06	4.20348e+06	5.19358e+06	4.03245e+06	4.99651e+06	3.07666e+06	3.60536e+06	3.33977e+06	4.33415e+06	3.44869e+06
P08551	7	7	422.79	3.21484e-11	2.04243	Condition 3	Condition 1	Neurofilament light polypeptide OS=Mus musculus GN=Nefl PE=1 SV=5	175486	212310	168363	188193	179077	174881	209144	207457	235570	204305	212045	221066	397922	421881	342703	326988	391469	362255	228271	249541	263353	213420	271931	221926	139473	189775	130055	178912	140277	165854	155936	207457	195919	204784	181959	223221	212934	245061	193271	225223	221223
Q923D5	8	8	332.07	3.23168e-11	1.75275	Condition 3	Condition 1	WW domain-binding protein 11 OS=Mus musculus GN=Wbp11 PE=1 SV=2	441717	470872	512987	495493	452828	371513	741572	809967	798568	780774	826691	829747	861334	680358	828699	770593	858526	812507	827837	814393	803988	738119	809268	801889	351070	420894	396266	471057	354715	352335	552909	809967	664155	782607	709395	837837	460912	395205	467354	530769	485161
P61255	3	3	151.42	3.27008e-11	1.53678	Condition 1	Condition 3	60S ribosomal protein L26 OS=Mus musculus GN=Rpl26 PE=1 SV=1	365127	390335	367095	386532	323273	360249	241097	245870	237304	257755	223373	225639	242646	258791	226585	234740	245993	218006	236938	241946	260454	263808	244224	238264	290198	348905	283569	367470	253231	341652	179760	245870	197362	258360	191679	227839	129843	150326	127785	161684	139013
P28661	19	16	1225.9	3.29795e-11	1.38685	Condition 2	Condition 4	Septin-4 OS=Mus musculus GN=Sept4 PE=1 SV=1	3.33303e+06	3.25715e+06	3.21381e+06	3.12261e+06	3.16756e+06	2.94763e+06	3.667e+06	3.64314e+06	3.60673e+06	3.42823e+06	3.4886e+06	3.41848e+06	3.3293e+06	3.3325e+06	3.13525e+06	3.05146e+06	3.40705e+06	3.11918e+06	2.58081e+06	2.6011e+06	2.67446e+06	2.54384e+06	2.49291e+06	2.43093e+06	2.64904e+06	2.91144e+06	2.48256e+06	2.96861e+06	2.48125e+06	2.79547e+06	2.73408e+06	3.64314e+06	2.99965e+06	3.43627e+06	2.99362e+06	3.45181e+06	1.78156e+06	1.93578e+06	1.76816e+06	2.10179e+06	1.92536e+06
P15105	21	20	1838.28	3.45425e-11	1.42272	Condition 1	Condition 2	Glutamine synthetase OS=Mus musculus GN=Glul PE=1 SV=6	2.53103e+07	2.52514e+07	2.41658e+07	2.53396e+07	2.33711e+07	2.34057e+07	1.76701e+07	1.7486e+07	1.69578e+07	1.70747e+07	1.65357e+07	1.74893e+07	1.81946e+07	2.133e+07	1.75906e+07	1.8848e+07	1.81695e+07	1.8058e+07	1.8183e+07	1.86983e+07	1.77609e+07	1.83241e+07	1.90383e+07	1.82023e+07	2.01163e+07	2.25712e+07	1.86673e+07	2.40899e+07	1.83074e+07	2.21975e+07	1.31747e+07	1.7486e+07	1.41035e+07	1.71148e+07	1.41895e+07	1.76599e+07	9.73619e+06	1.23901e+07	9.9204e+06	1.29821e+07	1.02677e+07
Q6ZWN5	4	4	125.84	3.46856e-11	1.7774	Condition 1	Condition 2	40S ribosomal protein S9 OS=Mus musculus GN=Rps9 PE=1 SV=3	467646	491391	441546	436934	438845	446265	266338	257301	263751	248519	242186	253705	237893	294476	304728	240554	256272	237171	307529	288085	293232	282344	262707	244809	371678	439234	341079	415386	343762	423229	198579	257301	219357	249102	207823	256179	127300	171055	171854	165689	144822
P62274	1	1	139.81	3.57768e-11	2.36067	Condition 1	Condition 4	40S ribosomal protein S29 OS=Mus musculus GN=Rps29 PE=3 SV=2	564767	611546	640491	520891	708040	615749	323395	349326	324140	284939	322639	349074	263939	352224	298438	369788	343194	348491	256670	271283	246039	243350	231149	302544	448868	546636	494758	495202	554630	583963	241121	349326	269582	285607	276861	352478	141238	204599	168307	254703	193942
Q6S7F2	1	1	31.47	3.81651e-11	1.83628	Condition 3	Condition 1	Transcription factor E2F7 OS=Mus musculus GN=E2f7 PE=1 SV=1	191615	240339	254905	214416	236858	229230	272111	244469	287913	258251	272446	243508	413869	361120	447301	455070	409532	423968	330202	360064	363397	339062	334043	367991	152292	214830	196905	203842	185539	217397	202883	244469	239452	258858	233789	245882	221467	209767	252260	313443	231430
Q9D7B6	5	5	289.91	4.13097e-11	1.60249	Condition 3	Condition 1	Isobutyryl-CoA dehydroge0se, mitochondrial OS=Mus musculus GN=Acad8 PE=1 SV=2	499833	476529	435664	510767	509843	451912	550524	603668	560786	535484	597582	588816	787486	790308	748439	726114	832940	737161	682977	779642	815619	669285	723306	722671	397260	425950	336536	485578	399377	428584	410465	603668	466396	536741	512793	594557	421395	459072	422090	500133	470702
Q80TL4	11	11	815.41	4.14474e-11	1.4468	Condition 1	Condition 3	PHD finger protein 24 OS=Mus musculus GN=Phf24 PE=1 SV=2	2.46105e+06	2.74066e+06	2.56944e+06	2.63152e+06	2.49761e+06	2.79851e+06	1.86622e+06	1.93635e+06	1.8453e+06	1.82156e+06	1.77216e+06	1.82985e+06	1.8821e+06	2.00301e+06	1.7169e+06	1.77028e+06	1.81926e+06	1.65916e+06	1.86564e+06	2.00695e+06	1.83987e+06	1.92401e+06	1.85951e+06	2.00626e+06	1.956e+06	2.44976e+06	1.98481e+06	2.50174e+06	1.95646e+06	2.65405e+06	1.39143e+06	1.93635e+06	1.5347e+06	1.82583e+06	1.52072e+06	1.84769e+06	1.00714e+06	1.1635e+06	968261	1.21933e+06	1.02808e+06
Q923D4	2	2	192.13	4.14573e-11	1.64627	Condition 4	Condition 1	Splicing factor 3B subunit 5 OS=Mus musculus GN=Sf3b5 PE=1 SV=1	755699	752946	679443	810956	788770	794395	1.20939e+06	1.22194e+06	1.25715e+06	1.11589e+06	1.00812e+06	1.05668e+06	1.2666e+06	1.24984e+06	1.28069e+06	1.18567e+06	1.2032e+06	1.18326e+06	1.21666e+06	1.28561e+06	1.33215e+06	1.35818e+06	1.15643e+06	1.19452e+06	600618	673028	524847	770963	617870	753387	901712	1.22194e+06	1.04555e+06	1.11851e+06	865085	1.06698e+06	677779	726006	722257	816667	679939
P47738	23	21	1552.32	4.58028e-11	1.3365	Condition 4	Condition 1	Aldehyde dehydroge0se, mitochondrial OS=Mus musculus GN=Aldh2 PE=1 SV=1	4.38243e+06	4.52595e+06	4.2913e+06	4.34853e+06	4.5041e+06	4.18266e+06	4.67038e+06	4.4073e+06	4.63186e+06	4.58088e+06	4.25587e+06	4.39375e+06	5.81173e+06	5.05322e+06	5.56232e+06	5.48599e+06	5.81628e+06	5.70843e+06	5.77699e+06	6.24464e+06	5.94069e+06	5.81741e+06	5.83406e+06	5.4492e+06	3.48309e+06	4.04557e+06	3.31488e+06	4.13407e+06	3.52821e+06	3.96675e+06	3.48219e+06	4.4073e+06	3.85224e+06	4.59163e+06	3.65202e+06	4.43659e+06	3.10994e+06	2.9353e+06	3.13693e+06	3.77864e+06	3.28683e+06
Q61584	10	10	882.02	4.73397e-11	1.81061	Condition 4	Condition 1	Fragile X mental retardation syndrome-related protein 1 OS=Mus musculus GN=Fxr1 PE=1 SV=2	563177	617521	592038	681829	540297	576153	891517	881813	874327	861699	829441	853125	909862	1.2669e+06	990037	1.13325e+06	1.01871e+06	984033	1.05425e+06	1.19346e+06	1.06243e+06	1.03124e+06	1.05934e+06	1.06499e+06	447605	551977	457330	648203	423233	546411	664707	881813	727163	863722	711754	861443	486880	735916	558342	780559	575680
P62264	4	4	234.61	4.81467e-11	1.74589	Condition 1	Condition 2	40S ribosomal protein S14 OS=Mus musculus GN=Rps14 PE=1 SV=3	627151	601251	576632	630522	610426	637679	311468	368561	339440	360053	372777	357601	408768	466342	492171	464919	412034	442901	452665	501421	458062	401824	461411	477382	498449	537434	445429	599426	478167	604761	232228	368561	282307	360898	319885	361087	218737	270888	277565	320227	232844
O55091	3	3	172.74	4.93056e-11	1.57788	Condition 1	Condition 2	Protein IMPACT OS=Mus musculus GN=Impact PE=1 SV=2	1.26092e+06	1.28535e+06	1.20147e+06	1.21251e+06	1.2115e+06	1.34945e+06	816157	802554	754425	797152	816269	780090	1.08618e+06	1.08988e+06	884023	969066	1.03348e+06	1.00024e+06	1.01656e+06	996782	916876	957707	1.01189e+06	1.03188e+06	1.00216e+06	1.14892e+06	928092	1.15271e+06	949010	1.27979e+06	608519	802554	627442	799023	700451	787695	581228	633088	498554	667474	584028
Q61543	2	2	122.74	4.99649e-11	1.96301	Condition 4	Condition 1	Golgi apparatus protein 1 OS=Mus musculus GN=Glg1 PE=1 SV=1	152682	184230	155448	164787	153944	160334	247586	285409	286497	294772	307756	261299	304831	291044	289685	266682	298550	295140	353211	357163	315641	258622	337302	284981	121349	164675	120079	156660	120590	152058	184598	285409	238274	295464	264089	263846	163120	169061	163371	183685	168714
P61027	7	4	548.34	5.16192e-11	1.36905	Condition 1	Condition 3	Ras-related protein Rab-10 OS=Mus musculus GN=Rab10 PE=1 SV=1	4.98612e+06	5.2443e+06	5.19424e+06	5.30469e+06	4.97037e+06	5.06402e+06	4.35477e+06	4.09746e+06	4.03772e+06	4.16672e+06	4.09136e+06	3.9382e+06	3.6266e+06	3.67654e+06	3.76377e+06	3.99396e+06	3.7864e+06	3.62356e+06	4.54255e+06	4.17847e+06	4.20235e+06	4.08589e+06	4.59802e+06	4.21148e+06	3.96289e+06	4.68767e+06	4.01238e+06	5.04308e+06	3.89345e+06	4.80261e+06	3.24688e+06	4.09746e+06	3.3581e+06	4.1765e+06	3.51085e+06	3.9766e+06	1.94065e+06	2.13562e+06	2.12262e+06	2.75096e+06	2.13973e+06
Q8VD37	23	23	1761.68	5.62149e-11	1.31463	Condition 1	Condition 4	SH3-containing GRB2-like protein 3-interacting protein 1 OS=Mus musculus GN=Sgip1 PE=1 SV=1	2.85159e+06	2.85626e+06	3.0057e+06	2.99155e+06	2.9203e+06	2.82174e+06	2.69249e+06	2.54476e+06	2.52575e+06	2.51117e+06	2.49433e+06	2.53178e+06	2.16827e+06	2.4808e+06	2.22741e+06	2.15174e+06	2.2735e+06	2.16455e+06	2.28748e+06	2.1276e+06	2.22516e+06	2.14332e+06	2.28928e+06	2.19866e+06	2.2664e+06	2.5531e+06	2.3218e+06	2.84402e+06	2.28757e+06	2.67608e+06	2.00749e+06	2.54476e+06	2.10062e+06	2.51707e+06	2.14041e+06	2.55646e+06	1.16027e+06	1.44104e+06	1.25617e+06	1.48208e+06	1.28478e+06
Q8CHG7	10	10	592.66	5.66053e-11	1.49955	Condition 1	Condition 3	Rap guanine nucleotide exchange factor 2 OS=Mus musculus GN=Rapgef2 PE=1 SV=2	545051	577497	555588	555552	604207	539609	429064	413972	390810	448473	422391	464943	398682	383219	362893	348798	392270	366482	424931	441637	426771	436267	460639	415323	433198	516201	429173	528154	473295	511753	319907	413972	325030	449525	362459	469476	213341	222604	204658	240246	221675
P17710	65	64	4678.08	5.72237e-11	1.68662	Condition 4	Condition 1	Hexoki0se-1 OS=Mus musculus GN=Hk1 PE=1 SV=3	2.08048e+07	2.32748e+07	2.27219e+07	2.24421e+07	2.02583e+07	2.13045e+07	2.73185e+07	2.79063e+07	3.04562e+07	2.74997e+07	2.85989e+07	2.90458e+07	3.13403e+07	3.84776e+07	3.02221e+07	3.01174e+07	3.11514e+07	2.99701e+07	3.67839e+07	3.74744e+07	3.52394e+07	3.57274e+07	3.98614e+07	3.55346e+07	1.65353e+07	2.08044e+07	1.75519e+07	2.13353e+07	1.5869e+07	2.02047e+07	2.03685e+07	2.79063e+07	2.53299e+07	2.75642e+07	2.45411e+07	2.9329e+07	1.67707e+07	2.23508e+07	1.70441e+07	2.07443e+07	1.7604e+07
P08226	15	15	1013.75	5.88134e-11	1.42046	Condition 1	Condition 2	Apolipoprotein E OS=Mus musculus GN=Apoe PE=1 SV=2	1.18018e+06	1.26433e+06	1.21545e+06	1.29036e+06	1.13795e+06	1.17316e+06	880130	832258	894678	807761	846514	850686	984375	1.1137e+06	1.12705e+06	1.0472e+06	1.07964e+06	998398	1.10412e+06	1.10177e+06	1.07234e+06	1.1163e+06	1.10555e+06	1.0651e+06	937985	1.13013e+06	938896	1.22672e+06	891395	1.1126e+06	656217	832258	744088	809656	726405	858980	526753	646921	635612	721294	610113
P14211	22	22	1947.19	6.11454e-11	1.33476	Condition 3	Condition 4	Calreticulin OS=Mus musculus GN=Calr PE=1 SV=1	1.39881e+07	1.49145e+07	1.41521e+07	1.45564e+07	1.3451e+07	1.39923e+07	1.44596e+07	1.40115e+07	1.40755e+07	1.41803e+07	1.43552e+07	1.44487e+07	1.51089e+07	1.68902e+07	1.43854e+07	1.5114e+07	1.51381e+07	1.5425e+07	1.12061e+07	1.21074e+07	1.12543e+07	1.15869e+07	1.14497e+07	1.13679e+07	1.11175e+07	1.33315e+07	1.0932e+07	1.38385e+07	1.05366e+07	1.327e+07	1.07809e+07	1.40115e+07	1.17063e+07	1.42136e+07	1.23184e+07	1.45896e+07	8.08499e+06	9.81117e+06	8.11281e+06	1.04103e+07	8.5547e+06
Q8BH04	13	13	697.57	6.48506e-11	1.52486	Condition 4	Condition 1	Phosphoenolpyruvate carboxyki0se [GTP], mitochondrial OS=Mus musculus GN=Pck2 PE=1 SV=1	556131	514549	608669	589844	492398	508282	541611	591898	551042	566856	532983	583566	694980	735466	703819	677507	705572	731692	813692	826138	798986	800014	928352	818929	442004	459935	470176	560755	385711	482044	403820	591898	458292	568187	457360	589255	371894	427216	396926	466654	398725
Q9CR62	2	2	141.59	6.51189e-11	6.37439	Condition 4	Condition 1	Mitochondrial 2-oxoglutarate/malate carrier protein OS=Mus musculus GN=Slc25a11 PE=1 SV=3	59488.2	91462.5	57295.7	59670.9	90381.7	76085.2	195336	209188	212833	119813	146734	169922	451654	232146	236200	219378	217402	186547	485258	400816	465468	508539	482655	426197	47280.3	81754.6	44259	56728.1	70798.9	72157.6	145641	209188	177010	120094	125914	171579	241687	134849	133208	151104	122856
P13707	10	10	510.94	6.98863e-11	1.3711	Condition 2	Condition 4	Glycerol-3-phosphate dehydroge0se [0D(+)], cytoplasmic OS=Mus musculus GN=Gpd1 PE=1 SV=3	1.59978e+06	1.58397e+06	1.75955e+06	1.67608e+06	1.61684e+06	1.56826e+06	1.90652e+06	1.74648e+06	1.80856e+06	1.71765e+06	1.8215e+06	1.75461e+06	1.44387e+06	1.47416e+06	1.43635e+06	1.37041e+06	1.4783e+06	1.37428e+06	1.33779e+06	1.31105e+06	1.40864e+06	1.23828e+06	1.29322e+06	1.25533e+06	1.27148e+06	1.41585e+06	1.35919e+06	1.59342e+06	1.26652e+06	1.4873e+06	1.42148e+06	1.74648e+06	1.50415e+06	1.72168e+06	1.56305e+06	1.77172e+06	772636	856307	810044	943910	835403
P83870	3	3	168.53	7.14886e-11	1.73699	Condition 3	Condition 1	PHD finger-like domain-containing protein 5A OS=Mus musculus GN=Phf5a PE=1 SV=1	153154	146441	159809	155148	142576	156821	226377	232129	231731	221868	232270	249784	271244	261719	256720	278536	257749	261551	228132	238041	191332	267620	250078	264948	121724	130898	123447	147496	111684	148725	168785	232129	192727	222389	199314	252220	145147	152027	144780	191850	145656
P08775	8	8	477.49	7.49522e-11	1.38849	Condition 3	Condition 1	D0-directed R0 polymerase II subunit RPB1 OS=Mus musculus GN=Polr2a PE=1 SV=3	321658	346365	320079	327307	320035	329274	448073	428951	428035	448680	423881	444254	435279	488955	427052	467184	417085	492441	445461	456688	420505	453220	436296	425188	255649	309602	247250	311165	250694	312276	334079	428951	355989	449733	363738	448585	232924	284023	240840	321788	235699
P04370	15	15	1743.44	7.64506e-11	1.44487	Condition 3	Condition 1	Myelin basic protein OS=Mus musculus GN=Mbp PE=1 SV=2	4.4637e+08	4.88842e+08	4.52581e+08	4.46464e+08	4.51178e+08	4.71169e+08	5.73578e+08	5.38958e+08	5.41886e+08	5.40748e+08	5.43072e+08	5.0204e+08	6.7915e+08	6.98301e+08	6.62896e+08	6.04894e+08	7.0531e+08	6.32388e+08	5.90465e+08	5.53905e+08	5.88268e+08	6.02493e+08	5.55524e+08	5.7681e+08	3.54768e+08	4.36956e+08	3.49603e+08	4.24446e+08	3.53422e+08	4.46846e+08	4.27654e+08	5.38958e+08	4.50677e+08	5.42017e+08	4.66017e+08	5.06935e+08	3.63423e+08	4.05628e+08	3.73847e+08	4.1664e+08	3.98577e+08
Q9CPW4	6	6	412.73	7.89075e-11	1.33981	Condition 1	Condition 2	Actin-related protein 2/3 complex subunit 5 OS=Mus musculus GN=Arpc5 PE=1 SV=3	1.76279e+06	1.75746e+06	1.66053e+06	1.80735e+06	1.7445e+06	1.55467e+06	1.28016e+06	1.34855e+06	1.25687e+06	1.27418e+06	1.23179e+06	1.28661e+06	1.36177e+06	1.41232e+06	1.27558e+06	1.32033e+06	1.28548e+06	1.37013e+06	1.33943e+06	1.34229e+06	1.34439e+06	1.35937e+06	1.37026e+06	1.40269e+06	1.40104e+06	1.57092e+06	1.2827e+06	1.71821e+06	1.36652e+06	1.47442e+06	954473	1.34855e+06	1.04531e+06	1.27717e+06	1.05701e+06	1.29915e+06	728703	820384	719377	909417	726435
Q61701	10	10	655.94	7.93566e-11	1.60835	Condition 2	Condition 1	ELAV-like protein 4 OS=Mus musculus GN=Elavl4 PE=1 SV=1	1.17466e+06	1.33247e+06	1.19693e+06	1.25854e+06	1.08068e+06	1.2896e+06	1.82273e+06	1.92808e+06	1.90017e+06	2.18592e+06	1.92831e+06	2.02865e+06	1.73997e+06	1.83401e+06	1.68098e+06	1.83172e+06	1.80173e+06	1.69326e+06	1.71212e+06	1.7515e+06	1.95931e+06	1.90028e+06	1.99193e+06	1.74316e+06	933605	1.19104e+06	924585	1.19648e+06	846531	1.22303e+06	1.35901e+06	1.92808e+06	1.58034e+06	2.19105e+06	1.65471e+06	2.04843e+06	931084	1.06533e+06	948009	1.26165e+06	1.01817e+06
Q61699	29	28	2230.67	8.07767e-11	1.45144	Condition 1	Condition 3	Heat shock protein 105 kDa OS=Mus musculus GN=Hsph1 PE=1 SV=2	3.07368e+06	3.17266e+06	3.18286e+06	3.14627e+06	3.01096e+06	3.08478e+06	2.24335e+06	2.39823e+06	2.34744e+06	2.36355e+06	2.28402e+06	2.48394e+06	2.06182e+06	2.33442e+06	2.03673e+06	2.09113e+06	2.10064e+06	2.23922e+06	2.00281e+06	2.39362e+06	2.147e+06	2.20856e+06	2.08305e+06	2.39433e+06	2.44291e+06	2.83591e+06	2.45865e+06	2.99111e+06	2.35859e+06	2.92554e+06	1.67262e+06	2.39823e+06	1.95232e+06	2.3691e+06	1.95995e+06	2.50816e+06	1.10331e+06	1.35601e+06	1.14863e+06	1.44033e+06	1.18709e+06
Q91XL9	4	4	165.25	8.53869e-11	1.60433	Condition 1	Condition 4	Oxysterol-binding protein-related protein 1 OS=Mus musculus GN=Osbpl1a PE=1 SV=2	343079	405668	389854	345268	355310	365449	274735	260868	268717	278962	261483	285842	225713	237698	225252	228404	240513	264471	215538	229446	218075	209289	253496	248326	272674	362610	301149	328241	278326	346584	204840	260868	223487	279617	224382	288629	120783	138074	127033	157320	135916
Q9Z126	2	2	68.89	9.7668e-11	2.4645	Condition 3	Condition 1	Platelet factor 4 OS=Mus musculus GN=Pf4 PE=1 SV=1	54221.7	72114.8	78887.8	62709.7	62625.9	59624.7	97467.3	90581.6	99430.1	93228.9	89266.7	103044	134012	178386	150267	171731	147027	180188	88490.6	121088	101529	109292	103819	114299	43094.6	64460.5	60938.2	59617	49056.9	56546.8	72670.8	90581.6	82694.3	93447.7	76600.9	104048	71711.9	103620	84744.4	118285	83086.6
Q0VEJ0	1	1	36.17	1.02978e-10	2.45578	Condition 2	Condition 1	Centrosomal protein of 76 kDa OS=Mus musculus GN=Cep76 PE=1 SV=1	93701.4	95352.5	93683.8	99307.9	91430.4	82277.8	260567	234095	199527	238236	212813	219573	158324	188863	140557	180870	212097	150213	115960	137431	118192	140389	151726	148918	74472.4	85231.7	72367.6	94410.3	71620.4	78030.5	194276	234095	165943	238795	182617	221714	84721.5	109706	79268.4	124580	119858
Q8K019	3	3	98.87	1.03683e-10	4.07668	Condition 1	Condition 4	Bcl-2-associated transcription factor 1 OS=Mus musculus GN=Bclaf1 PE=1 SV=2	73273.4	77190.2	67375.7	65563.5	67177.1	74957.6	32950.1	39901	23674	37023	43163.1	36506.8	28303.6	22417.6	31893.3	23810.3	23010.3	35759.2	21600.2	19653.6	18602.7	16971.9	14578.7	12976.3	58236.6	68997.2	52045.5	62330.1	52622	71088.2	24567.3	39901	19689.2	37109.9	37038.9	36862.7	15145.7	13021.9	17986.5	16400.1	13003.3
Q00422	2	2	80.44	1.05128e-10	1.87789	Condition 2	Condition 1	GA-binding protein alpha chain OS=Mus musculus GN=Gabpa PE=1 SV=2	117603	111820	123142	123127	129014	114082	213435	225025	228737	247367	205456	229788	224058	162686	213989	197742	223364	219126	182239	183714	192642	179833	161385	197404	93468.9	99951.4	95123.2	117055	101061	108193	159135	225025	190236	247948	176305	232029	119897	94500.6	120682	136201	126225
O35668	1	1	62.83	1.05718e-10	3.34541	Condition 4	Condition 2	Huntingtin-associated protein 1 OS=Mus musculus GN=Hap1 PE=1 SV=1	131550	123574	119131	166177	110757	151075	114466	87597	64932.3	101719	94589.6	62477.9	235376	265223	207573	199011	248577	224321	259968	352883	283307	279674	278579	304541	104554	110458	92024.7	157982	86759.3	143276	85344.5	87597	54003.1	101957	81168.6	63087.1	125953	154062	117063	137075	140473
P24549	8	8	510.7	1.11588e-10	1.40461	Condition 2	Condition 4	Reti0l dehydroge0se 1 OS=Mus musculus GN=Aldh1a1 PE=1 SV=5	1.30228e+06	1.30217e+06	1.30349e+06	1.21649e+06	1.28826e+06	1.20029e+06	1.424e+06	1.36063e+06	1.3622e+06	1.35792e+06	1.33416e+06	1.39715e+06	1.2881e+06	1.07713e+06	1.19575e+06	1.14557e+06	1.2493e+06	1.24646e+06	962753	963551	971418	1.00695e+06	1.02325e+06	935665	1.03503e+06	1.16396e+06	1.00691e+06	1.1565e+06	1.00914e+06	1.13833e+06	1.06172e+06	1.36063e+06	1.13292e+06	1.36111e+06	1.14486e+06	1.41077e+06	689283	625680	674354	789047	705992
P70333	20	20	1541.21	1.21688e-10	1.53801	Condition 4	Condition 1	Heterogeneous nuclear ribonucleoprotein H2 OS=Mus musculus GN=Hnrnph2 PE=1 SV=1	1.21415e+07	1.21642e+07	1.2827e+07	1.23441e+07	1.25456e+07	1.28471e+07	1.69105e+07	1.6535e+07	1.72358e+07	1.62337e+07	1.65239e+07	1.59587e+07	1.79064e+07	2.20349e+07	1.68218e+07	1.78858e+07	1.68023e+07	1.70578e+07	1.87564e+07	2.00434e+07	1.87898e+07	1.86835e+07	1.9498e+07	1.93788e+07	9.64984e+06	1.08731e+07	9.90842e+06	1.17353e+07	9.82735e+06	1.21839e+07	1.26083e+07	1.6535e+07	1.43347e+07	1.62718e+07	1.41793e+07	1.61143e+07	9.58197e+06	1.27996e+07	9.48683e+06	1.23194e+07	9.49513e+06
P08414	4	3	222.34	1.2328e-10	1.86638	Condition 1	Condition 3	Calcium/calmodulin-dependent protein ki0se type IV OS=Mus musculus GN=Camk4 PE=1 SV=2	423882	337669	378376	335686	442967	330636	252394	286688	279678	272958	307821	272956	189475	215027	183567	208950	219197	188905	177220	199914	214412	199581	208388	212721	336895	301829	292283	319131	346990	313568	188183	286688	232603	273598	264146	275617	101391	124905	103525	143920	123870
Q8BHE3	7	7	326.19	1.2391e-10	1.54596	Condition 1	Condition 4	Caytaxin OS=Mus musculus GN=Atcay PE=1 SV=1	2.16038e+06	2.37971e+06	2.08828e+06	2.10056e+06	1.90256e+06	2.06273e+06	1.39727e+06	1.3882e+06	1.48261e+06	1.46384e+06	1.5152e+06	1.50335e+06	1.45119e+06	1.55284e+06	1.43264e+06	1.33761e+06	1.31826e+06	1.31837e+06	1.42506e+06	1.36553e+06	1.50358e+06	1.34248e+06	1.25967e+06	1.31489e+06	1.71704e+06	2.12713e+06	1.61313e+06	1.99696e+06	1.49034e+06	1.95625e+06	1.04179e+06	1.3882e+06	1.23306e+06	1.46728e+06	1.30022e+06	1.51801e+06	776551	902009	807952	921322	744963
Q8K3J1	2	2	124.55	1.24352e-10	2.3044	Condition 4	Condition 1	0DH dehydroge0se [ubiquinone] iron-sulfur protein 8, mitochondrial OS=Mus musculus GN=Ndufs8 PE=1 SV=1	146056	145335	139992	131635	146433	128847	249264	233541	255115	266489	242146	229002	237187	165948	243483	234105	278255	230160	302787	308665	332842	299414	375296	312771	116083	129909	108139	125143	114706	122196	185849	233541	212174	267114	207789	231235	126922	96395.4	137315	161247	157244
Q7TNV0	11	11	766.62	1.24443e-10	1.3562	Condition 3	Condition 1	Protein DEK OS=Mus musculus GN=Dek PE=1 SV=1	2.14216e+06	2.31094e+06	2.20384e+06	2.29311e+06	2.12021e+06	2.09705e+06	2.7798e+06	2.8736e+06	2.69262e+06	2.7845e+06	2.71948e+06	2.84856e+06	3.04377e+06	3.17758e+06	2.84485e+06	2.98267e+06	2.91557e+06	2.89309e+06	2.31331e+06	2.6406e+06	2.38682e+06	2.44592e+06	2.41408e+06	2.58793e+06	1.70256e+06	2.06565e+06	1.70239e+06	2.18002e+06	1.66083e+06	1.98879e+06	2.07259e+06	2.8736e+06	2.2394e+06	2.79103e+06	2.33362e+06	2.87633e+06	1.62876e+06	1.84578e+06	1.60438e+06	2.05441e+06	1.64761e+06
O35393	4	4	180.89	1.25365e-10	1.34002	Condition 3	Condition 1	Ephrin-B3 OS=Mus musculus GN=Efnb3 PE=1 SV=1	381316	397895	383819	383639	343374	359607	415407	404517	406623	419357	435477	414486	520047	512780	488166	496584	514618	482378	480749	487306	475478	465097	446975	506051	303064	355662	296487	364720	268976	341044	309724	404517	338181	420342	373688	418527	278285	297862	275306	342037	290815
P54227	10	9	881.78	1.25648e-10	1.44172	Condition 1	Condition 3	Stathmin OS=Mus musculus GN=Stmn1 PE=1 SV=2	5.36434e+06	6.10164e+06	5.63953e+06	5.65213e+06	5.62101e+06	5.72474e+06	4.58652e+06	4.4665e+06	4.25326e+06	4.477e+06	4.2023e+06	4.20006e+06	3.8934e+06	4.49e+06	3.72283e+06	3.92561e+06	3.95787e+06	3.66499e+06	4.45263e+06	4.4357e+06	4.43218e+06	4.55804e+06	4.39928e+06	4.3003e+06	4.26349e+06	5.45401e+06	4.35634e+06	5.37339e+06	4.40312e+06	5.42922e+06	3.41967e+06	4.4665e+06	3.53736e+06	4.4875e+06	3.60605e+06	4.24101e+06	2.08342e+06	2.60814e+06	2.09953e+06	2.70389e+06	2.23663e+06
O70161	13	13	1000.81	1.25823e-10	1.34642	Condition 1	Condition 3	Phosphatidylinositol 4-phosphate 5-ki0se type-1 gamma OS=Mus musculus GN=Pip5k1c PE=1 SV=2	3.43173e+06	3.63132e+06	3.60903e+06	3.60073e+06	3.51252e+06	3.4949e+06	3.06807e+06	3.03063e+06	3.02611e+06	3.27377e+06	2.88901e+06	3.25711e+06	2.56965e+06	2.93635e+06	2.47485e+06	2.70648e+06	2.56315e+06	2.55451e+06	2.64791e+06	2.74105e+06	2.57849e+06	2.68909e+06	2.69308e+06	2.6992e+06	2.72748e+06	3.24589e+06	2.78785e+06	3.42315e+06	2.75147e+06	3.31449e+06	2.28753e+06	3.03063e+06	2.51676e+06	3.28146e+06	2.4791e+06	3.28887e+06	1.37506e+06	1.70566e+06	1.39572e+06	1.86417e+06	1.44846e+06
Q99MU3	9	9	501.93	1.29252e-10	1.4188	Condition 3	Condition 1	Double-stranded R0-specific adenosine deami0se OS=Mus musculus GN=Adar PE=1 SV=2	592230	577246	617193	592203	577838	607105	659612	694190	669811	688756	687913	687530	845554	977075	829945	797494	774218	832046	790906	822409	856858	804790	892650	796215	470695	515977	476761	562997	452640	575766	491801	694190	557070	690372	590307	694234	452468	567561	468056	549298	437518
Q91W39	7	7	441.56	1.30336e-10	1.52209	Condition 3	Condition 1	Nuclear receptor coactivator 5 OS=Mus musculus GN=Ncoa5 PE=1 SV=1	889460	961842	993674	991664	932395	947733	1.33295e+06	1.27186e+06	1.3345e+06	1.5778e+06	1.36964e+06	1.3378e+06	1.39811e+06	1.66248e+06	1.39285e+06	1.40558e+06	1.40573e+06	1.43669e+06	1.34198e+06	1.36047e+06	1.36726e+06	1.3025e+06	1.44261e+06	1.33597e+06	706929	859751	767580	942758	730376	898810	993833	1.27186e+06	1.10988e+06	1.5815e+06	1.1753e+06	1.35084e+06	748151	965700	785513	968135	794390
O88741	2	2	142.75	1.31107e-10	2.1622	Condition 4	Condition 1	Ganglioside-induced differentiation-associated protein 1 OS=Mus musculus GN=Gdap1 PE=1 SV=1	236842	209804	232970	189699	182640	196750	325835	297696	332170	268965	277182	313939	333579	338592	370293	405174	352941	376470	384752	431472	521292	491438	467894	403103	188238	187535	179962	180343	143068	186593	242939	297696	276260	269596	237853	317000	178503	196681	208830	279076	199450
Q61656	26	26	2097.93	1.32478e-10	1.48466	Condition 3	Condition 1	Probable ATP-dependent R0 helicase DDX5 OS=Mus musculus GN=Ddx5 PE=1 SV=2	3.68509e+06	3.758e+06	3.82183e+06	3.98972e+06	3.60968e+06	3.96414e+06	4.92145e+06	5.26366e+06	5.36008e+06	6.02371e+06	5.0802e+06	5.42405e+06	5.82059e+06	6.3518e+06	5.2127e+06	5.50195e+06	5.34943e+06	5.65612e+06	5.4413e+06	5.63283e+06	5.28663e+06	5.35353e+06	5.6797e+06	5.42981e+06	2.92885e+06	3.35912e+06	2.95223e+06	3.79296e+06	2.82758e+06	3.75951e+06	3.66939e+06	5.26366e+06	4.45789e+06	6.03785e+06	4.35939e+06	5.47693e+06	3.11468e+06	3.68962e+06	2.93976e+06	3.78964e+06	3.02301e+06
Q9DC70	1	1	33.83	1.33737e-10	2.62207	Condition 4	Condition 1	0DH dehydroge0se [ubiquinone] iron-sulfur protein 7, mitochondrial OS=Mus musculus GN=Ndufs7 PE=1 SV=1	68324.6	54034.7	58696.2	56037.2	48352	60893.2	92226.6	64691	84624.3	91757.5	81506.7	105555	96898.1	114954	114778	106345	92555.1	116141	144992	150728	160196	128202	166142	157862	54303.4	48299.4	45340.8	53273.6	37875.7	57749.8	68763.3	64691	70380.6	91972.8	69942	106584	51851.6	66774.1	64730.4	73248.6	52303.7
Q8BPN8	58	58	4021.52	1.38302e-10	1.32687	Condition 1	Condition 3	DmX-like protein 2 OS=Mus musculus GN=Dmxl2 PE=1 SV=3	4.33527e+06	4.5921e+06	4.38988e+06	4.5471e+06	4.24925e+06	4.18e+06	3.63794e+06	3.43165e+06	3.6917e+06	3.51058e+06	3.53684e+06	3.43955e+06	3.25675e+06	3.18405e+06	3.25393e+06	3.49078e+06	3.50701e+06	3.12378e+06	3.67627e+06	3.81602e+06	3.82181e+06	3.84626e+06	3.9419e+06	3.683e+06	3.44561e+06	4.10469e+06	3.39104e+06	4.32285e+06	3.32858e+06	3.96422e+06	2.71242e+06	3.43165e+06	3.07032e+06	3.51881e+06	3.03501e+06	3.47309e+06	1.74273e+06	1.84955e+06	1.83509e+06	2.40438e+06	1.98184e+06
Q9D2M8	9	9	565.15	1.38828e-10	1.29884	Condition 1	Condition 4	Ubiquitin-conjugating enzyme E2 variant 2 OS=Mus musculus GN=Ube2v2 PE=1 SV=4	4.04148e+06	3.83357e+06	4.02705e+06	3.81955e+06	3.95762e+06	3.60428e+06	3.22302e+06	3.26729e+06	3.45908e+06	3.3246e+06	3.34931e+06	3.48666e+06	3.14713e+06	3.15139e+06	3.0412e+06	3.31914e+06	3.19543e+06	3.28308e+06	2.98778e+06	3.09592e+06	2.93749e+06	2.9227e+06	3.06054e+06	2.92199e+06	3.2121e+06	3.42667e+06	3.11076e+06	3.63118e+06	3.10013e+06	3.41822e+06	2.40305e+06	3.26729e+06	2.87686e+06	3.3324e+06	2.87409e+06	3.52065e+06	1.68408e+06	1.83057e+06	1.71512e+06	2.28616e+06	1.80577e+06
P99028	1	1	102.03	1.44886e-10	1.93898	Condition 4	Condition 1	Cytochrome b-c1 complex subunit 6, mitochondrial OS=Mus musculus GN=Uqcrh PE=1 SV=2	529642	503286	588341	567692	627685	555036	730257	719167	690642	745610	886857	933658	958687	996976	972065	897488	887785	982398	1.19427e+06	1.0841e+06	1.0486e+06	954557	1.15605e+06	1.10005e+06	420951	449867	454474	539695	491686	526384	544473	719167	574395	747359	761024	942761	513007	579121	548206	618172	501696
Q62421	8	8	532.34	1.49471e-10	1.38625	Condition 4	Condition 1	Endophilin-A3 OS=Mus musculus GN=Sh3gl3 PE=1 SV=1	1.62698e+06	1.43634e+06	1.66329e+06	1.62879e+06	1.54125e+06	1.50762e+06	1.5711e+06	1.56615e+06	1.58358e+06	1.70259e+06	1.4256e+06	1.56931e+06	2.04256e+06	1.83779e+06	1.82126e+06	1.94289e+06	1.8771e+06	1.94118e+06	2.12825e+06	2.21625e+06	2.24193e+06	2.04907e+06	2.22705e+06	2.17415e+06	1.2931e+06	1.28389e+06	1.28484e+06	1.54847e+06	1.20731e+06	1.4298e+06	1.1714e+06	1.56615e+06	1.31703e+06	1.70658e+06	1.22333e+06	1.58461e+06	1.093e+06	1.06753e+06	1.02712e+06	1.33822e+06	1.06077e+06
Q9CQ19	4	4	182.58	1.50545e-10	1.52886	Condition 3	Condition 2	Myosin regulatory light polypeptide 9 OS=Mus musculus GN=Myl9 PE=1 SV=3	387282	395853	403092	388816	363774	363674	365281	346072	365967	403699	330229	397995	592454	560513	555726	572799	558545	537576	412128	491942	470360	462132	436248	423880	307806	353837	311375	369641	284956	344901	272350	346072	304368	404647	283374	401876	317031	325589	313408	394533	315639
Q6IRU5	12	11	793.07	1.5099e-10	1.39067	Condition 1	Condition 4	Clathrin light chain B OS=Mus musculus GN=Cltb PE=1 SV=1	2.19998e+06	2.50608e+06	2.49452e+06	2.33849e+06	2.33065e+06	2.41073e+06	1.84998e+06	1.92393e+06	1.75866e+06	1.95489e+06	1.9064e+06	1.9035e+06	1.90565e+06	1.79048e+06	1.64972e+06	1.86344e+06	1.91852e+06	1.73463e+06	1.69564e+06	1.76307e+06	1.73725e+06	1.68291e+06	1.68956e+06	1.70034e+06	1.74851e+06	2.24009e+06	1.92693e+06	2.22317e+06	1.82568e+06	2.28628e+06	1.37933e+06	1.92393e+06	1.46264e+06	1.95948e+06	1.63591e+06	1.92206e+06	1.01974e+06	1.04005e+06	930380	1.2835e+06	1.08418e+06
P03930	2	2	96.98	1.56345e-10	2.44121	Condition 4	Condition 1	ATP synthase protein 8 OS=Mus musculus GN=Mtatp8 PE=1 SV=1	285462	277703	274834	231685	192388	226866	489032	509109	468743	442880	584684	408702	571892	478244	569403	476628	548247	492577	656861	567273	717466	581714	547358	564135	226880	248227	212300	220259	150704	215155	364618	509109	389845	443920	501725	412687	306028	277801	321121	328292	309819
Q01065	10	10	598.11	1.60553e-10	1.20385	Condition 4	Condition 3	Calcium/calmodulin-dependent 3',5'-cyclic nucleotide phosphodiesterase 1B OS=Mus musculus GN=Pde1b PE=1 SV=2	1.58962e+06	1.55062e+06	1.6986e+06	1.61838e+06	1.62071e+06	1.63233e+06	1.43547e+06	1.37423e+06	1.33129e+06	1.41219e+06	1.36063e+06	1.44077e+06	1.36602e+06	1.36649e+06	1.34813e+06	1.35903e+06	1.37508e+06	1.36225e+06	1.71922e+06	1.67261e+06	1.60128e+06	1.612e+06	1.68915e+06	1.54964e+06	1.26341e+06	1.38604e+06	1.31212e+06	1.53857e+06	1.26955e+06	1.54807e+06	1.07027e+06	1.37423e+06	1.10721e+06	1.4155e+06	1.16757e+06	1.45481e+06	730977	793765	760291	936076	777069
Q8BVQ5	8	8	445.85	1.65381e-10	1.53641	Condition 1	Condition 3	Protein phosphatase methylesterase 1 OS=Mus musculus GN=Ppme1 PE=1 SV=5	1.69013e+06	1.9725e+06	1.94013e+06	2.05739e+06	1.82636e+06	1.82743e+06	1.59948e+06	1.43446e+06	1.45313e+06	1.64181e+06	1.40741e+06	1.52797e+06	1.25404e+06	1.2937e+06	1.24133e+06	1.2228e+06	1.16615e+06	1.18586e+06	1.36093e+06	1.4418e+06	1.41179e+06	1.44192e+06	1.51852e+06	1.40538e+06	1.34329e+06	1.76314e+06	1.49869e+06	1.95593e+06	1.43065e+06	1.7331e+06	1.19255e+06	1.43446e+06	1.20855e+06	1.64566e+06	1.20772e+06	1.54287e+06	671056	751480	700062	842240	659003
Q61316	40	40	3032.38	1.68617e-10	1.3095	Condition 1	Condition 3	Heat shock 70 kDa protein 4 OS=Mus musculus GN=Hspa4 PE=1 SV=1	4.44163e+06	4.53321e+06	4.26741e+06	4.51659e+06	4.24495e+06	4.33993e+06	3.62706e+06	3.35634e+06	3.24426e+06	3.57602e+06	3.45226e+06	3.36887e+06	3.20047e+06	3.68283e+06	3.23523e+06	3.38348e+06	3.2007e+06	3.41465e+06	3.26354e+06	3.46522e+06	3.36172e+06	3.3923e+06	3.36896e+06	3.5064e+06	3.53014e+06	4.05206e+06	3.29643e+06	4.29384e+06	3.32521e+06	4.1159e+06	2.7043e+06	3.35634e+06	2.69819e+06	3.58441e+06	2.96243e+06	3.40172e+06	1.71262e+06	2.13927e+06	1.82454e+06	2.33048e+06	1.80874e+06
P62702	12	12	778.8	1.71713e-10	1.53779	Condition 1	Condition 2	40S ribosomal protein S4, X isoform OS=Mus musculus GN=Rps4x PE=1 SV=2	1.39292e+06	1.38766e+06	1.42929e+06	1.46008e+06	1.44954e+06	1.42641e+06	875477	974578	955559	918600	881399	951631	1.00604e+06	1.14295e+06	881330	1.0484e+06	1.02525e+06	1.01663e+06	974168	1.02966e+06	1.08691e+06	1.04675e+06	934079	1.0846e+06	1.10707e+06	1.24037e+06	1.10408e+06	1.38807e+06	1.13547e+06	1.35278e+06	652748	974578	794721	920756	756340	960909	538348	663914	497035	722117	579376
P28650	3	3	209.35	1.76149e-10	1.41391	Condition 1	Condition 4	Adenylosucci0te synthetase isozyme 1 OS=Mus musculus GN=Adssl1 PE=1 SV=2	403943	431041	427652	447913	450922	414736	337357	361323	370126	366096	360374	349367	391100	362506	354925	355239	356209	339783	305818	315869	307328	317048	297200	278782	321048	385290	330347	425824	353222	393327	251530	361323	307827	366956	309241	352773	209284	210571	200164	244682	201297
Q9Z0F7	4	4	389.26	1.81727e-10	1.83436	Condition 3	Condition 2	Gamma-synuclein OS=Mus musculus GN=Sncg PE=1 SV=1	1.12562e+06	961662	775557	932053	869646	908573	844610	994696	913269	925434	856306	774279	1.56912e+06	1.81519e+06	1.60885e+06	1.43903e+06	1.70139e+06	1.60429e+06	1.48282e+06	1.38307e+06	1.45504e+06	1.37019e+06	1.24933e+06	1.29819e+06	894627	859590	599092	886087	681222	861671	629733	994696	759550	927606	734807	781828	839658	1.0544e+06	907330	991173	961472
Q9WV34	18	18	1478.46	1.8298e-10	1.44605	Condition 4	Condition 1	MAGUK p55 subfamily member 2 OS=Mus musculus GN=Mpp2 PE=1 SV=1	1.99704e+06	2.15568e+06	2.21143e+06	2.05248e+06	1.90975e+06	2.13557e+06	2.81853e+06	3.05356e+06	2.78923e+06	2.98437e+06	2.66135e+06	2.91896e+06	2.37694e+06	2.65518e+06	2.29573e+06	2.36983e+06	2.43268e+06	2.56868e+06	3.09813e+06	3.01863e+06	2.78771e+06	3.12249e+06	3.08964e+06	2.90404e+06	1.58722e+06	1.92687e+06	1.70826e+06	1.95126e+06	1.49597e+06	2.02533e+06	2.10147e+06	3.05356e+06	2.31976e+06	2.99137e+06	2.28374e+06	2.94742e+06	1.27193e+06	1.54233e+06	1.2947e+06	1.63229e+06	1.37473e+06
Q7TSY6	5	5	278.02	1.87894e-10	1.41585	Condition 4	Condition 1	CUGBP Elav-like family member 4 OS=Mus musculus GN=Celf4 PE=1 SV=2	373907	422941	379405	401276	422052	385732	412310	409218	394981	418248	440271	399790	483441	513158	533026	526985	527830	496700	608314	553650	608902	535242	557645	513503	297175	378049	293078	381487	330607	365820	307415	409218	328498	419229	377802	403688	258696	298082	300605	362977	298281
Q9CZS1	6	6	431.85	1.92016e-10	1.55072	Condition 4	Condition 2	Aldehyde dehydroge0se X, mitochondrial OS=Mus musculus GN=Aldh1b1 PE=1 SV=1	822364	789162	822595	789337	755283	729992	630395	613393	631893	653802	546761	638513	676613	563315	619514	579626	710037	613075	891516	965463	1.02977e+06	967307	966843	939638	653602	705400	635427	750409	591637	692309	470017	613393	525534	655336	469183	644738	362065	327217	349381	399236	401248
Q91ZS8	7	7	432.66	1.92155e-10	1.71874	Condition 3	Condition 1	Double-stranded R0-specific editase 1 OS=Mus musculus GN=Adarb1 PE=1 SV=1	391879	352542	421342	346205	429319	409440	625857	651416	658775	650060	617666	766333	772358	615076	677825	639912	671615	663494	675436	600501	633481	592343	717417	641198	311459	315123	325473	329132	336299	388304	466633	651416	547892	651585	530027	773805	413300	357284	382267	440759	379536
P83917	3	3	252.29	1.94625e-10	1.65867	Condition 4	Condition 1	Chromobox protein homolog 1 OS=Mus musculus GN=Cbx1 PE=1 SV=1	3.68494e+06	3.67501e+06	4.00169e+06	3.67364e+06	3.92229e+06	3.41464e+06	6.24987e+06	5.33671e+06	6.04198e+06	5.79586e+06	5.81205e+06	5.79695e+06	6.80545e+06	4.88305e+06	6.27577e+06	5.79597e+06	6.58482e+06	5.918e+06	6.2259e+06	5.95931e+06	6.34022e+06	6.03692e+06	6.5803e+06	5.96557e+06	2.92873e+06	3.28495e+06	3.09117e+06	3.49246e+06	3.07246e+06	3.23837e+06	4.65984e+06	5.33671e+06	5.02501e+06	5.80946e+06	4.9874e+06	5.85347e+06	3.6417e+06	2.83645e+06	3.53929e+06	3.99215e+06	3.72114e+06
O54983	16	16	1121.93	1.97324e-10	2.13623	Condition 4	Condition 2	Ketimine reductase mu-crystallin OS=Mus musculus GN=Crym PE=1 SV=1	3.45817e+06	3.223e+06	2.47549e+06	2.66536e+06	3.43147e+06	3.44149e+06	2.10326e+06	2.0483e+06	2.12268e+06	2.19007e+06	1.96237e+06	2.03119e+06	2.37341e+06	2.0836e+06	2.80696e+06	2.92221e+06	2.33793e+06	2.23134e+06	4.42926e+06	4.51724e+06	4.36403e+06	4.47197e+06	4.42564e+06	4.40475e+06	2.7485e+06	2.88091e+06	1.91224e+06	2.53391e+06	2.68798e+06	3.26384e+06	1.56817e+06	2.0483e+06	1.76539e+06	2.19521e+06	1.68394e+06	2.05099e+06	1.27005e+06	1.21031e+06	1.58301e+06	2.01276e+06	1.32118e+06
P68404	19	17	1382.53	1.9821e-10	1.33437	Condition 1	Condition 2	Protein ki0se C beta type OS=Mus musculus GN=Prkcb PE=1 SV=4	4.92667e+06	4.95429e+06	5.08337e+06	4.8445e+06	5.0669e+06	4.56319e+06	3.87267e+06	3.72069e+06	3.60308e+06	3.78761e+06	3.57891e+06	3.49916e+06	3.84708e+06	3.90428e+06	3.92467e+06	3.9146e+06	3.83555e+06	3.68953e+06	4.18277e+06	4.1975e+06	4.70345e+06	4.43083e+06	4.50394e+06	4.11074e+06	3.91564e+06	4.42843e+06	3.92674e+06	4.60559e+06	3.96907e+06	4.32763e+06	2.88743e+06	3.72069e+06	2.99662e+06	3.7965e+06	3.07111e+06	3.53328e+06	2.05863e+06	2.26791e+06	2.21336e+06	2.6963e+06	2.1675e+06
P13020	2	2	144.07	1.99052e-10	1.69545	Condition 3	Condition 1	Gelsolin OS=Mus musculus GN=Gsn PE=1 SV=3	651740	727273	680701	688574	714459	699447	1.08467e+06	838198	915566	912119	917223	969235	1.19722e+06	1.35854e+06	1.01338e+06	1.19669e+06	1.15537e+06	1.13559e+06	1.04414e+06	1.12943e+06	1.05399e+06	1.2236e+06	1.12911e+06	1.12867e+06	517993	650079	525819	654615	559659	663341	808718	838198	761460	914260	787081	978685	640652	789146	571506	824257	652909
Q8K0U4	49	47	4363.05	2.00861e-10	1.26261	Condition 1	Condition 2	Heat shock 70 kDa protein 12A OS=Mus musculus GN=Hspa12a PE=1 SV=1	1.15e+07	1.18716e+07	1.14402e+07	1.18428e+07	1.13571e+07	1.10794e+07	9.3301e+06	9.00163e+06	9.42453e+06	9.2322e+06	8.64847e+06	9.08394e+06	1.0127e+07	1.01286e+07	9.31092e+06	9.27376e+06	9.44617e+06	9.71939e+06	9.59882e+06	9.6297e+06	9.42193e+06	9.16411e+06	9.87355e+06	9.2611e+06	9.14002e+06	1.06116e+07	8.83716e+06	1.12588e+07	8.89641e+06	1.05074e+07	6.95644e+06	9.00163e+06	7.83822e+06	9.25387e+06	7.42136e+06	9.1725e+06	5.41911e+06	5.88351e+06	5.25099e+06	6.38759e+06	5.33812e+06
P14152	21	20	1820.49	2.00917e-10	1.293	Condition 1	Condition 2	Malate dehydroge0se, cytoplasmic OS=Mus musculus GN=Mdh1 PE=1 SV=3	4.11755e+07	4.44e+07	4.26733e+07	4.07737e+07	4.13048e+07	3.99529e+07	3.21587e+07	3.15081e+07	3.21744e+07	3.11527e+07	3.29683e+07	3.36025e+07	3.33763e+07	3.34555e+07	3.18009e+07	3.11454e+07	3.51668e+07	3.18989e+07	3.22486e+07	3.48112e+07	3.44417e+07	3.37647e+07	3.43547e+07	3.21202e+07	3.27256e+07	3.96873e+07	3.29637e+07	3.87629e+07	3.23554e+07	3.78905e+07	2.39772e+07	3.15081e+07	2.67589e+07	3.12259e+07	2.82906e+07	3.39301e+07	1.78601e+07	1.94336e+07	1.79344e+07	2.14523e+07	1.98731e+07
E9Q414	1	1	40.01	2.01288e-10	2.32084	Condition 1	Condition 4	Apolipoprotein B-100 OS=Mus musculus GN=Apob PE=1 SV=1	76436.6	79863.3	88341.4	86426.8	81506.9	76672.6	37763.7	32634.8	41645.9	34110.9	34539.2	38174.8	42127.4	38692.7	47970.6	44217.7	27227	46606	32052.5	38728.2	35064.9	34486.2	35355.9	35118.9	60750.6	71386.5	68240.8	82164.5	63847.1	72714.7	28156.3	32634.8	34636.2	34190.9	29638.6	38547	22543	22475.7	27053.5	30456.3	15386.2
Q8BTM8	20	19	1139.51	2.02574e-10	1.56005	Condition 3	Condition 2	Filamin-A OS=Mus musculus GN=Fl0 PE=1 SV=5	722264	788952	691782	778466	671398	752457	677337	646319	638002	662701	647217	642814	987434	1.14082e+06	951129	978825	1.03795e+06	1.01049e+06	811722	772377	764040	793747	671563	783793	574044	705212	534378	740074	525928	713614	505016	646319	530615	664256	555385	649081	528390	662678	536399	674196	586553
Q78IK2	1	1	36.4	2.09651e-10	1.77081	Condition 3	Condition 1	Up-regulated during skeletal muscle growth protein 5 OS=Mus musculus GN=Usmg5 PE=1 SV=1	362357	297117	333511	281067	303658	323421	498057	520864	520597	528988	540989	565368	613561	565628	566900	536258	516647	567554	641277	566516	452226	516336	503378	558150	287996	265581	257626	267206	237865	306726	371347	520864	432971	530229	464230	570880	328325	328561	319709	369364	291962
Q8R404	1	1	29.38	2.23001e-10	2.05169	Condition 4	Condition 1	MICOS complex subunit MIC13 OS=Mus musculus GN=Mic13 PE=1 SV=1	19032.3	20529.3	20285.1	25677.9	23791.7	26805.3	44468.6	46384.1	42156.5	40867.5	37404.2	44854.8	43074.7	42159.9	39367	42438.4	37928	37678.4	48188.1	38005.6	48572.5	50959.8	49498.8	44054.8	15126.6	18350.3	15669.6	24411.5	18636.8	25421.5	33155.4	46384.1	35060.8	40963.4	32097	45292.2	23049.9	24489.7	22201.4	29230.8	21433.4
Q01147	6	6	490.97	2.23792e-10	1.39365	Condition 3	Condition 1	Cyclic AMP-responsive element-binding protein 1 OS=Mus musculus GN=Creb1 PE=1 SV=1	808674	866593	851972	828974	868293	815171	1.18213e+06	1.15158e+06	1.06568e+06	1.16936e+06	1.05969e+06	1.11305e+06	1.11263e+06	1.29538e+06	1.13218e+06	1.15939e+06	1.10327e+06	1.22069e+06	1.05137e+06	1.02674e+06	1.06174e+06	1.07626e+06	987663	996564	642721	774612	658120	788091	680163	773090	881386	1.15158e+06	886311	1.1721e+06	909333	1.1239e+06	595383	752456	638505	798564	623468
Q61838	8	8	468.16	2.26076e-10	1.66162	Condition 3	Condition 1	Preg0ncy zone protein OS=Mus musculus GN=Pzp PE=1 SV=3	426485	442996	440239	439424	435653	377837	466042	470509	432315	501203	413365	450919	697448	647020	718178	668576	814604	712300	632388	720221	779968	671680	640997	578425	338963	395976	340070	417753	341261	358333	347476	470509	359549	502379	354714	455316	373215	375839	405024	460502	460340
P62761	7	7	531.53	2.31356e-10	1.25534	Condition 1	Condition 4	Visinin-like protein 1 OS=Mus musculus GN=Vsnl1 PE=1 SV=2	4.36474e+06	4.1829e+06	4.48564e+06	4.21253e+06	4.12357e+06	4.12933e+06	3.92613e+06	3.77176e+06	3.75945e+06	3.8436e+06	3.98247e+06	3.88013e+06	3.46434e+06	3.7262e+06	3.45111e+06	3.60001e+06	3.44149e+06	3.48469e+06	3.399e+06	3.60851e+06	3.35326e+06	3.24178e+06	3.3336e+06	3.37607e+06	3.46903e+06	3.73892e+06	3.465e+06	4.00478e+06	3.23013e+06	3.91617e+06	2.92729e+06	3.77176e+06	3.12667e+06	3.85262e+06	3.41741e+06	3.91796e+06	1.85382e+06	2.16447e+06	1.94629e+06	2.47962e+06	1.94482e+06
Q3U4G3	1	1	45.83	2.46586e-10	1.73846	Condition 1	Condition 3	Xyloside xylosyltransferase 1 OS=Mus musculus GN=Xxylt1 PE=1 SV=2	123886	132231	145194	132374	133316	142641	88806.2	101551	103228	105758	94277.7	105818	89343.5	84714.5	73710	72295.7	70395.3	75263.8	73160.7	75252.9	93394.7	82747.1	81169.4	79673.3	98462.3	118196	112158	125846	104431	135277	66213.1	101551	85852.7	106006	80900.9	106849	47809	49208.8	41569.5	49795.9	39781
Q9ERI6	3	3	189.66	2.47382e-10	1.67042	Condition 4	Condition 2	Retinol dehydroge0se 14 OS=Mus musculus GN=Rdh14 PE=1 SV=1	103404	122351	113108	130014	121256	125504	129060	100567	113800	118073	121811	108690	137508	124667	128051	120642	133938	128697	187360	200826	190489	187872	174759	214628	82184.1	109365	87372.5	123602	94984.1	119025	96225.7	100567	94645.8	118350	104527	109750	73582.6	72416.6	72215.6	83095.6	75689.6
Q99MR6	10	10	433.03	2.6124e-10	1.45709	Condition 3	Condition 1	Serrate R0 effector molecule homolog OS=Mus musculus GN=Srrt PE=1 SV=1	378091	409962	397299	399892	348772	377373	501682	483419	448814	483744	452538	518470	582748	558164	562498	581479	555781	527227	520451	513607	579516	510198	530890	503745	300500	366449	306900	380170	273204	357892	374050	483419	373271	484879	388329	523525	311837	324225	317226	400511	314077
Q9CQS2	1	1	81.49	2.61343e-10	1.807	Condition 4	Condition 1	H/ACA ribonucleoprotein complex subunit 3 OS=Mus musculus GN=Nop10 PE=3 SV=1	340769	382830	425431	461587	369631	350820	553842	590360	536837	593908	562462	558307	571695	716014	629840	606211	673902	597884	667762	639212	750085	739789	728958	686442	270838	342196	328631	438823	289544	332710	412939	590360	446478	595302	482656	563751	305922	415917	355205	417547	380828
Q8BP92	3	2	234.9	2.64237e-10	1.55967	Condition 4	Condition 2	Reticulocalbin-2 OS=Mus musculus GN=Rcn2 PE=1 SV=1	275406	256735	251281	267312	275433	244162	256355	241220	214163	211221	227642	212836	316726	334051	360131	324227	323927	340503	359950	350730	337071	338604	408467	331696	218888	229485	194106	254129	215755	231558	191136	241220	178115	211717	195342	214912	169484	194043	203100	223321	183054
P16460	10	9	467.28	2.65733e-10	1.34709	Condition 4	Condition 2	Argininosucci0te synthase OS=Mus musculus GN=Ass1 PE=1 SV=1	328542	347607	349417	341892	300620	336628	291206	299272	286908	298986	329470	303850	377746	420440	399624	397978	407661	389710	423837	413435	416599	397642	400345	385951	261120	310712	269913	325031	235486	319251	217120	299272	238616	299688	282722	306813	202137	244224	225372	274119	230373
P35278	5	4	356.94	2.79245e-10	1.22275	Condition 4	Condition 2	Ras-related protein Rab-5C OS=Mus musculus GN=Rab5c PE=1 SV=2	1.29258e+06	1.2932e+06	1.28946e+06	1.29659e+06	1.25399e+06	1.29615e+06	1.07226e+06	1.0767e+06	1.09016e+06	1.12139e+06	1.08197e+06	1.09634e+06	1.195e+06	1.01281e+06	1.11797e+06	1.14022e+06	1.13402e+06	1.15799e+06	1.35024e+06	1.32285e+06	1.32926e+06	1.34626e+06	1.34707e+06	1.29967e+06	1.02732e+06	1.15594e+06	996067	1.23265e+06	982288	1.22924e+06	799469	1.0767e+06	906671	1.12402e+06	928450	1.10703e+06	639461	588319	630489	785359	640847
P62245	5	5	241.07	2.88209e-10	1.38302	Condition 1	Condition 2	40S ribosomal protein S15a OS=Mus musculus GN=Rps15a PE=1 SV=2	899908	1.02583e+06	948539	1.03336e+06	935498	1.04847e+06	687091	693231	711024	772958	679542	716094	761613	756377	707115	733162	680097	729356	794652	842443	816724	810956	793597	824726	715233	916945	732714	982394	732806	994349	512289	693231	591346	774772	583124	723076	407550	439363	398785	504988	384329
Q9EPJ9	13	12	1114.65	2.96124e-10	1.35642	Condition 1	Condition 3	ADP-ribosylation factor GTPase-activating protein 1 OS=Mus musculus GN=Arfgap1 PE=1 SV=2	1.8075e+06	1.85199e+06	1.84994e+06	1.80792e+06	1.75169e+06	1.7645e+06	1.39328e+06	1.4631e+06	1.4706e+06	1.56017e+06	1.46334e+06	1.43894e+06	1.17841e+06	1.34859e+06	1.31981e+06	1.40443e+06	1.36035e+06	1.37529e+06	1.45431e+06	1.54934e+06	1.45756e+06	1.49829e+06	1.49201e+06	1.4468e+06	1.43657e+06	1.65542e+06	1.42902e+06	1.71875e+06	1.37216e+06	1.67341e+06	1.03882e+06	1.4631e+06	1.22307e+06	1.56383e+06	1.25571e+06	1.45297e+06	630584	783364	744320	967343	768747
P97300	6	6	488.31	2.97695e-10	1.45451	Condition 2	Condition 4	Neuroplastin OS=Mus musculus GN=Nptn PE=1 SV=3	2.6935e+06	2.8688e+06	2.64707e+06	2.88743e+06	2.72403e+06	2.59214e+06	3.10556e+06	3.21264e+06	3.08909e+06	3.34072e+06	3.10643e+06	3.21685e+06	2.67893e+06	2.71104e+06	2.34043e+06	2.80633e+06	2.31035e+06	2.60507e+06	2.16972e+06	2.16473e+06	2.17263e+06	2.20118e+06	2.18272e+06	2.22087e+06	2.14075e+06	2.56431e+06	2.04477e+06	2.74503e+06	2.13382e+06	2.45833e+06	2.31548e+06	3.21264e+06	2.56914e+06	3.34856e+06	2.66567e+06	3.24821e+06	1.43353e+06	1.57478e+06	1.31991e+06	1.93295e+06	1.3056e+06
Q6PE01	4	4	380.18	2.97923e-10	1.39154	Condition 2	Condition 1	U5 small nuclear ribonucleoprotein 40 kDa protein OS=Mus musculus GN=Snrnp40 PE=1 SV=1	925587	947476	900197	937237	916973	830307	1.23489e+06	1.24367e+06	1.17468e+06	1.30498e+06	1.29982e+06	1.3367e+06	1.23237e+06	1.36214e+06	1.22427e+06	1.29901e+06	1.19217e+06	1.23839e+06	1.12e+06	1.16705e+06	1.2465e+06	1.19484e+06	1.2639e+06	1.11704e+06	735642	846910	695372	891015	718295	787445	920725	1.24367e+06	976959	1.30804e+06	1.11539e+06	1.34973e+06	659459	791236	690440	894731	673707
Q61481	2	2	183.79	3.00935e-10	1.53509	Condition 4	Condition 2	Calcium/calmodulin-dependent 3',5'-cyclic nucleotide phosphodiesterase 1A OS=Mus musculus GN=Pde1a PE=1 SV=2	666617	664935	659886	659359	590736	638495	451217	407422	447100	505903	414682	468319	554439	535438	593759	500880	501581	534591	709031	659033	733704	707729	676026	650999	529817	594358	509740	626842	462743	605535	336424	407422	371845	507091	355844	472885	296688	311024	334857	344997	283448
Q6ZPJ3	9	8	545.8	3.04144e-10	1.53668	Condition 1	Condition 2	(E3-independent) E2 ubiquitin-conjugating enzyme UBE2O OS=Mus musculus GN=Ube2o PE=1 SV=3	616817	673890	602438	591340	661255	611068	425330	392237	406369	413146	391482	416189	511639	501501	431972	442736	482301	460299	507190	501818	450686	531793	459500	481093	490237	602362	465363	562177	517983	579523	317122	392237	337970	414116	335936	420246	273786	291311	243615	304948	272553
P20917	8	8	639.04	3.06205e-10	1.42604	Condition 1	Condition 4	Myelin-associated glycoprotein OS=Mus musculus GN=Mag PE=1 SV=2	5.90941e+06	5.93718e+06	6.07626e+06	5.73408e+06	6.00603e+06	5.49752e+06	5.75054e+06	5.94038e+06	5.62632e+06	5.51443e+06	5.47537e+06	5.84675e+06	4.99811e+06	5.9579e+06	4.72949e+06	5.02879e+06	5.06706e+06	4.90962e+06	3.93869e+06	4.19763e+06	4.01112e+06	4.03297e+06	4.37394e+06	4.10165e+06	4.6967e+06	5.307e+06	4.69371e+06	5.45129e+06	4.70472e+06	5.21373e+06	4.28755e+06	5.94038e+06	4.67931e+06	5.52737e+06	4.69848e+06	5.90376e+06	2.67456e+06	3.46081e+06	2.66725e+06	3.46373e+06	2.86344e+06
Q3V3R4	1	1	54.11	3.25367e-10	1.58814	Condition 1	Condition 4	Integrin alpha-1 OS=Mus musculus GN=Itga1 PE=1 SV=2	181454	221124	203414	187661	201239	200943	153807	174022	161918	171981	166999	178768	147864	158472	153944	174297	147594	161727	123300	123005	116819	130616	123345	135895	144217	197654	157130	178406	157637	190570	114677	174022	134664	172385	143304	180510	79124	92052.8	86818.5	120052	83406.6
Q9Z0X1	2	1	65.78	3.42947e-10	2.50447	Condition 4	Condition 1	Apoptosis-inducing factor 1, mitochondrial OS=Mus musculus GN=Aifm1 PE=1 SV=1	237536	239340	260445	284018	164252	166895	527247	544575	485942	604511	475373	460116	434755	554667	603439	575208	526306	494511	545755	552003	569831	559713	595666	564297	188790	213936	201185	270011	128664	158279	393110	544575	404149	605930	407924	464602	232644	322194	340316	396192	297420
Q99K30	1	1	84.35	3.43264e-10	1.80418	Condition 2	Condition 1	Epidermal growth factor receptor ki0se substrate 8-like protein 2 OS=Mus musculus GN=Eps8l2 PE=1 SV=1	260732	277504	240847	241851	212911	216930	422698	419636	433645	469342	421581	450558	428216	413800	337431	409462	362244	414528	291587	292495	302007	234780	242591	271038	207226	248049	186047	229924	166780	205732	315160	419636	360655	470444	361765	454951	229145	240367	190298	282029	204707
Q9CZW5	4	4	239.36	3.47591e-10	1.48786	Condition 4	Condition 1	Mitochondrial import receptor subunit TOM70 OS=Mus musculus GN=Tomm70 PE=1 SV=2	401663	381522	385599	382910	352236	381588	384127	424287	393497	430896	448895	398431	443208	458005	486579	452475	489898	475080	612439	540243	622726	548091	538225	538798	319235	341027	297863	364026	275918	361890	286402	424287	327265	431907	385203	402315	237167	266045	274411	311656	276846
Q8R5M8	4	4	163.73	3.48031e-10	1.81387	Condition 4	Condition 2	Cell adhesion molecule 1 OS=Mus musculus GN=Cadm1 PE=1 SV=2	614038	561899	618152	600754	564823	519542	470021	462781	470942	556710	431901	502057	705455	575748	640582	627772	716142	585306	830447	868052	823053	908746	982083	837714	488028	502259	477502	571127	442444	492722	350443	462781	391674	558017	370620	506952	377499	334439	361263	432397	404699
Q7TMM9	58	48	6410.44	3.5471e-10	1.2417	Condition 1	Condition 2	Tubulin beta-2A chain OS=Mus musculus GN=Tubb2a PE=1 SV=1	3.61259e+08	3.62984e+08	3.7863e+08	3.6888e+08	3.65158e+08	3.49045e+08	3.03381e+08	2.86046e+08	2.80198e+08	2.89221e+08	2.95019e+08	3.06595e+08	3.05335e+08	3.13744e+08	2.88571e+08	2.89407e+08	2.95039e+08	2.83732e+08	3.24457e+08	3.31768e+08	3.22229e+08	3.12625e+08	3.31291e+08	3.13317e+08	2.87123e+08	3.24457e+08	2.92479e+08	3.50688e+08	2.8604e+08	3.31027e+08	2.26198e+08	2.86046e+08	2.33036e+08	2.899e+08	2.5316e+08	3.09584e+08	1.63389e+08	1.82247e+08	1.62743e+08	1.99338e+08	1.66729e+08
P55066	14	12	829.25	3.71994e-10	1.37931	Condition 1	Condition 3	Neurocan core protein OS=Mus musculus GN=Ncan PE=1 SV=1	1.39579e+06	1.56619e+06	1.48394e+06	1.62124e+06	1.50299e+06	1.53466e+06	1.15126e+06	1.16149e+06	1.13661e+06	1.04799e+06	1.06466e+06	1.14335e+06	1.17015e+06	1.16814e+06	1.07717e+06	1.05637e+06	1.08692e+06	1.04223e+06	1.21331e+06	1.06934e+06	1.1026e+06	1.06094e+06	1.13491e+06	1.1581e+06	1.10935e+06	1.39996e+06	1.1463e+06	1.54128e+06	1.17734e+06	1.45544e+06	858372	1.16149e+06	945295	1.05045e+06	913595	1.1545e+06	626165	678545	607479	727607	614231
Q8BMS4	3	3	162.93	3.93987e-10	1.81774	Condition 4	Condition 1	Ubiquinone biosynthesis O-methyltransferase, mitochondrial OS=Mus musculus GN=Coq3 PE=1 SV=1	209180	183245	222803	208623	174358	218056	251066	213702	217531	230808	234129	236564	253937	339238	273234	255122	267956	289865	339767	378959	374475	352088	386730	378834	166253	163796	172108	198334	136580	206800	187192	213702	180917	231350	200909	238871	135886	197056	154093	175723	151425
Q9CVB6	16	15	1108.58	3.97261e-10	1.3155	Condition 1	Condition 2	Actin-related protein 2/3 complex subunit 2 OS=Mus musculus GN=Arpc2 PE=1 SV=3	4.40007e+06	4.85038e+06	4.47499e+06	4.63217e+06	4.4493e+06	4.58357e+06	3.43237e+06	3.41119e+06	3.35587e+06	3.41248e+06	3.69448e+06	3.51504e+06	3.59329e+06	3.80438e+06	3.56358e+06	3.36503e+06	3.51356e+06	3.49182e+06	3.71413e+06	3.49912e+06	3.78974e+06	3.65595e+06	3.46344e+06	3.29689e+06	3.49711e+06	4.33556e+06	3.45678e+06	4.40373e+06	3.48528e+06	4.34696e+06	2.55914e+06	3.41119e+06	2.79102e+06	3.42049e+06	3.17028e+06	3.54931e+06	1.92282e+06	2.20988e+06	2.00972e+06	2.31777e+06	1.98554e+06
Q91VD9	5	5	321.53	3.99376e-10	2.3916	Condition 4	Condition 1	0DH-ubiquinone oxidoreductase 75 kDa subunit, mitochondrial OS=Mus musculus GN=Ndufs1 PE=1 SV=2	256891	253163	325459	258944	278658	239267	373930	410711	456913	430810	487234	462616	487995	340584	528276	404923	477794	418130	657866	676267	721602	605945	600337	594146	204173	226292	251406	246174	218282	226915	278799	410711	380006	431821	418102	467127	261133	197838	297927	278903	270006
Q9D1T0	4	4	143.55	4.03835e-10	1.83466	Condition 1	Condition 3	Leucine-rich repeat and immunoglobulin-like domain-containing nogo receptor-interacting protein 1 OS=Mus musculus GN=Lingo1 PE=1 SV=1	542447	529793	539054	548547	510937	543417	356342	371229	341698	377215	354387	364754	338531	278182	283167	290593	256275	305178	273269	356619	399454	316906	343405	305696	431128	473561	416401	521495	400234	515365	265685	371229	284184	378101	304104	368310	181153	161590	159695	200155	144823
P48453	11	10	674.59	4.16047e-10	1.40178	Condition 1	Condition 2	Serine/threonine-protein phosphatase 2B catalytic subunit beta isoform OS=Mus musculus GN=Ppp3cb PE=1 SV=2	2.96451e+06	2.89561e+06	2.65875e+06	2.92607e+06	2.79875e+06	2.89621e+06	2.06043e+06	2.0787e+06	2.03309e+06	2.06992e+06	1.92516e+06	2.05992e+06	2.23683e+06	2.46509e+06	2.02131e+06	2.06427e+06	2.26116e+06	2.23457e+06	2.44181e+06	2.36437e+06	2.27463e+06	2.39121e+06	2.44601e+06	2.28949e+06	2.35614e+06	2.58827e+06	2.0538e+06	2.78177e+06	2.19235e+06	2.7467e+06	1.53624e+06	2.0787e+06	1.69088e+06	2.07478e+06	1.652e+06	2.08001e+06	1.19696e+06	1.43192e+06	1.13994e+06	1.42183e+06	1.2778e+06
Q8BUH8	2	1	102.29	4.2375e-10	2.54118	Condition 2	Condition 1	Sentrin-specific protease 7 OS=Mus musculus GN=Senp7 PE=1 SV=1	39189.6	41728.1	43643.5	31355.4	39353.7	37157.8	89385.2	91310.1	92950.8	120535	79522.8	116939	96601	64545	105654	88116.4	94496.5	102312	104362	81877.2	106356	91496.9	90655.5	91904.3	31147.3	37299.1	33713.1	29809.1	30827	35239.7	66644.8	91310.1	77305.6	120817	68239.6	118079	51692.6	37492.8	59584.8	60692.9	53400.9
Q8CGU1	1	1	26.29	4.25047e-10	1.52987	Condition 1	Condition 3	Calcium-binding and coiled-coil domain-containing protein 1 OS=Mus musculus GN=Calcoco1 PE=1 SV=2	223362	213063	210856	216599	203003	224585	121338	156135	130909	146434	145886	144482	144551	130112	142779	143640	137806	145279	175234	174158	163729	176236	153046	189433	177525	190448	162880	205917	159019	212991	90468.6	156135	108875	146777	125187	145891	77351.5	75579.4	80521.9	98936.7	77875.2
Q5FWK3	9	8	412.22	4.25327e-10	1.38115	Condition 4	Condition 2	Rho GTPase-activating protein 1 OS=Mus musculus GN=Arhgap1 PE=1 SV=1	1.69446e+06	1.70571e+06	1.76049e+06	1.77387e+06	1.70878e+06	1.77769e+06	1.65845e+06	1.37927e+06	1.47108e+06	1.52905e+06	1.48326e+06	1.61609e+06	1.64954e+06	1.58268e+06	1.54213e+06	1.43175e+06	1.59969e+06	1.60344e+06	2.18157e+06	2.02816e+06	2.20793e+06	2.02707e+06	2.11452e+06	2.0606e+06	1.34673e+06	1.52466e+06	1.35992e+06	1.68639e+06	1.33854e+06	1.68593e+06	1.23653e+06	1.37927e+06	1.22347e+06	1.53264e+06	1.27281e+06	1.63185e+06	882694	919344	869701	986162	904001
Q9CQA3	9	9	436.27	4.36521e-10	1.86369	Condition 4	Condition 1	Succi0te dehydroge0se [ubiquinone] iron-sulfur subunit, mitochondrial OS=Mus musculus GN=Sdhb PE=1 SV=1	686533	599322	673295	658002	656762	623491	1.15724e+06	1.05131e+06	1.08271e+06	1.07704e+06	1.07357e+06	1.05321e+06	993160	663606	931539	861357	1.01639e+06	888124	1.31036e+06	1.17395e+06	1.25637e+06	1.13458e+06	1.2319e+06	1.15637e+06	545645	535709	520098	625552	514463	591306	862827	1.05131e+06	900472	1.07957e+06	921247	1.06348e+06	531454	385474	525351	593286	574370
P52503	2	2	89.86	4.43793e-10	3.04983	Condition 4	Condition 1	0DH dehydroge0se [ubiquinone] iron-sulfur protein 6, mitochondrial OS=Mus musculus GN=Ndufs6 PE=1 SV=2	81054.8	130133	88106.9	129233	75794.2	122735	195344	150730	162692	185528	154688	232318	269291	307258	267195	255671	236568	283423	294741	338164	310644	280268	343067	345531	64421.1	116321	68059.7	122859	59372.1	116400	145647	150730	135308	185964	132740	234583	144102	178479	150687	176101	133687
Q8R5H6	15	15	1744.53	4.62624e-10	1.44432	Condition 1	Condition 3	Wiskott-Aldrich syndrome protein family member 1 OS=Mus musculus GN=Wasf1 PE=1 SV=2	5.67728e+06	5.86501e+06	5.65164e+06	5.50391e+06	6.02638e+06	5.55266e+06	4.91717e+06	4.51624e+06	4.61223e+06	4.77477e+06	4.52936e+06	4.39337e+06	4.3401e+06	4.06381e+06	3.606e+06	3.55826e+06	4.00358e+06	4.1605e+06	4.01825e+06	4.09897e+06	4.25761e+06	4.21639e+06	3.93823e+06	3.69423e+06	4.51221e+06	5.24249e+06	4.3657e+06	5.23247e+06	4.72066e+06	5.26602e+06	3.6662e+06	4.51624e+06	3.83591e+06	4.78598e+06	3.8867e+06	4.43621e+06	2.32245e+06	2.36058e+06	2.03364e+06	2.45086e+06	2.26246e+06
P97760	3	3	230.8	4.63892e-10	1.7459	Condition 3	Condition 1	D0-directed R0 polymerase II subunit RPB3 OS=Mus musculus GN=Polr2c PE=1 SV=2	147398	133262	175960	172067	179146	152382	305754	250605	262190	248812	250596	236187	280713	284512	274909	264450	301505	270351	251544	273001	295012	247882	277251	258305	117150	119117	135923	163582	140331	144516	227967	250605	218059	249396	215040	238490	150214	165267	155038	182148	170383
P63158	12	12	1164.57	4.64229e-10	1.49691	Condition 3	Condition 1	High mobility group protein B1 OS=Mus musculus GN=Hmgb1 PE=1 SV=2	1.53501e+07	1.95998e+07	1.77367e+07	1.74964e+07	1.80249e+07	1.7908e+07	2.32504e+07	2.50878e+07	2.54143e+07	2.34342e+07	2.61772e+07	2.31273e+07	2.73066e+07	2.5265e+07	2.68607e+07	2.61308e+07	2.76901e+07	2.55924e+07	2.30007e+07	2.20441e+07	2.25988e+07	2.31411e+07	2.07845e+07	2.08567e+07	1.22e+07	1.75195e+07	1.3701e+07	1.66335e+07	1.41195e+07	1.69836e+07	1.73353e+07	2.50878e+07	2.11366e+07	2.34892e+07	2.2463e+07	2.33528e+07	1.46122e+07	1.46759e+07	1.51484e+07	1.79984e+07	1.56479e+07
P59708	2	2	164.82	4.65187e-10	1.47728	Condition 2	Condition 1	Splicing factor 3B subunit 6 OS=Mus musculus GN=Sf3b6 PE=1 SV=1	513547	484183	541287	546185	507107	494272	780861	727854	715669	807438	742929	784988	755331	872608	743491	687571	736189	686043	732402	785409	743111	714080	810119	719988	408160	432791	418126	519249	397234	468757	582203	727854	595209	809333	637517	792642	404189	506878	419300	473586	416027
Q8CHC4	41	40	2936.35	4.70108e-10	1.3706	Condition 1	Condition 3	Sy0ptojanin-1 OS=Mus musculus GN=Synj1 PE=1 SV=3	7.81873e+06	8.28555e+06	7.57483e+06	7.94842e+06	7.64414e+06	7.68081e+06	5.80448e+06	5.93135e+06	5.81525e+06	6.29019e+06	5.77771e+06	6.03673e+06	5.70439e+06	6.39022e+06	5.17293e+06	5.87348e+06	5.83433e+06	5.28149e+06	5.86298e+06	6.08515e+06	5.73236e+06	6.05701e+06	5.70288e+06	6.00766e+06	6.2142e+06	7.40612e+06	5.8513e+06	7.55643e+06	5.9879e+06	7.28431e+06	4.32777e+06	5.93135e+06	4.83644e+06	6.30495e+06	4.95793e+06	6.09559e+06	3.0525e+06	3.71194e+06	2.91733e+06	4.04554e+06	3.29703e+06
O35691	1	1	74.37	5.13228e-10	1.6858	Condition 3	Condition 1	Pinin OS=Mus musculus GN=Pnn PE=1 SV=4	135352	135027	136875	147421	128626	147023	196046	216975	256595	209499	204492	196336	219143	258690	223295	218998	247206	232430	179405	164744	197005	184467	186527	192527	107576	120695	105732	140151	100757	139434	146170	216975	213405	209990	175477	198250	117267	150267	125930	150841	139698
Q9QWR8	7	7	405.53	5.1667e-10	1.55849	Condition 4	Condition 1	Alpha-N-acetylgalactosaminidase OS=Mus musculus GN=0ga PE=1 SV=2	413326	362341	405253	356323	348789	324410	486432	467664	451775	475165	463217	448178	623519	536432	573871	580536	590758	520593	603416	531167	623460	553950	598646	534312	328505	323882	313044	338751	273218	307664	362679	467664	375733	476281	397493	452547	333654	311602	323641	399862	333843
O88951	6	5	488.42	5.26562e-10	1.28558	Condition 4	Condition 1	Protein lin-7 homolog B OS=Mus musculus GN=Lin7b PE=1 SV=2	1.08207e+06	1.08363e+06	1.03275e+06	1.07344e+06	1.04527e+06	1.04984e+06	1.129e+06	1.14447e+06	1.16866e+06	1.12516e+06	1.20853e+06	1.08263e+06	1.29231e+06	1.20095e+06	1.31237e+06	1.28918e+06	1.21918e+06	1.21742e+06	1.44579e+06	1.35782e+06	1.33535e+06	1.41585e+06	1.28922e+06	1.34128e+06	860016	968616	797767	1.0205e+06	818791	995642	841770	1.14447e+06	971957	1.1278e+06	1.03706e+06	1.09318e+06	691536	697604	740128	887963	688969
P25444	9	9	375.09	5.29914e-10	1.57744	Condition 1	Condition 2	40S ribosomal protein S2 OS=Mus musculus GN=Rps2 PE=1 SV=3	1.32176e+06	1.33811e+06	1.16615e+06	1.20815e+06	1.20108e+06	1.17253e+06	723000	839032	734303	772873	840095	786768	872414	982369	942944	797836	942592	798126	897592	853420	848214	848518	845799	820227	1.05051e+06	1.19608e+06	900813	1.14856e+06	940845	1.112e+06	539062	839032	610707	774687	720896	794439	466842	570636	531783	549534	532668
Q8K021	3	3	195.17	5.38442e-10	1.57525	Condition 4	Condition 2	Secretory carrier-associated membrane protein 1 OS=Mus musculus GN=Scamp1 PE=1 SV=1	1.70645e+06	1.77507e+06	1.70767e+06	1.70102e+06	1.49866e+06	1.73256e+06	1.30679e+06	1.33962e+06	1.29388e+06	1.13207e+06	1.2773e+06	1.18612e+06	1.59884e+06	1.56639e+06	1.29113e+06	1.49928e+06	1.37515e+06	1.44527e+06	2.07108e+06	1.95089e+06	1.87541e+06	1.90454e+06	2.05967e+06	2.00914e+06	1.35626e+06	1.58667e+06	1.31912e+06	1.61713e+06	1.17395e+06	1.64312e+06	974331	1.33962e+06	1.0761e+06	1.13473e+06	1.09606e+06	1.19768e+06	855564	909879	728144	1.03268e+06	777110
Q7TMB8	25	22	1678.39	5.51282e-10	1.42729	Condition 1	Condition 4	Cytoplasmic FMR1-interacting protein 1 OS=Mus musculus GN=Cyfip1 PE=1 SV=1	5.36401e+06	5.56163e+06	5.5123e+06	5.54114e+06	5.05032e+06	5.43586e+06	4.43473e+06	4.28835e+06	4.00097e+06	4.65681e+06	4.29105e+06	4.36774e+06	3.89457e+06	4.44495e+06	3.64237e+06	3.89287e+06	3.84853e+06	3.99583e+06	3.80507e+06	4.13368e+06	3.74177e+06	3.68228e+06	3.82664e+06	3.55672e+06	4.26323e+06	4.97131e+06	4.25807e+06	5.26787e+06	3.95608e+06	5.15526e+06	3.30649e+06	4.28835e+06	3.32754e+06	4.66774e+06	3.68221e+06	4.41032e+06	2.08404e+06	2.58197e+06	2.05415e+06	2.68133e+06	2.17484e+06
P61982	15	15	1511.63	5.55872e-10	1.38083	Condition 1	Condition 2	14-3-3 protein gamma OS=Mus musculus GN=Ywhag PE=1 SV=2	2.64355e+07	2.75941e+07	2.56732e+07	2.48414e+07	2.37573e+07	2.5886e+07	1.80824e+07	1.83924e+07	1.89969e+07	1.81389e+07	1.95991e+07	1.84528e+07	2.09022e+07	2.17709e+07	1.93412e+07	2.19514e+07	2.20129e+07	2.09102e+07	2.18723e+07	2.05971e+07	2.1653e+07	2.11286e+07	1.96799e+07	2.07267e+07	2.10105e+07	2.46653e+07	1.98317e+07	2.36163e+07	1.86099e+07	2.45497e+07	1.34821e+07	1.83924e+07	1.57994e+07	1.81815e+07	1.68183e+07	1.86328e+07	1.11851e+07	1.26462e+07	1.09076e+07	1.51197e+07	1.24397e+07
P36916	3	3	137.68	5.58528e-10	1.59451	Condition 1	Condition 3	Guanine nucleotide-binding protein-like 1 OS=Mus musculus GN=Gnl1 PE=1 SV=4	179132	209431	190243	199084	185087	196766	125383	138292	133432	149275	139884	144854	122709	142759	109518	124271	111250	116829	133038	131674	133205	133256	119203	130322	142372	187202	146957	189266	144985	186608	93484.4	138292	110973	149625	120036	146267	65663.2	82925.6	61763.7	85595.8	62868.3
P51863	7	6	429.47	5.87781e-10	1.43028	Condition 4	Condition 2	V-type proton ATPase subunit d 1 OS=Mus musculus GN=Atp6v0d1 PE=1 SV=2	2.08803e+06	2.14096e+06	2.04506e+06	2.0675e+06	2.01086e+06	2.17426e+06	1.58999e+06	1.59732e+06	1.57974e+06	1.64872e+06	1.59603e+06	1.76045e+06	1.77247e+06	2.06537e+06	1.78131e+06	1.85286e+06	1.67067e+06	1.77224e+06	2.20249e+06	2.56152e+06	2.2685e+06	2.35489e+06	2.32549e+06	2.26419e+06	1.65953e+06	1.91372e+06	1.57974e+06	1.96554e+06	1.57517e+06	2.06202e+06	1.18549e+06	1.59732e+06	1.31384e+06	1.65259e+06	1.36957e+06	1.77761e+06	948473	1.19973e+06	1.00459e+06	1.27621e+06	944112
P60469	16	16	1044.13	5.88952e-10	1.45415	Condition 1	Condition 3	Liprin-alpha-3 OS=Mus musculus GN=Ppfia3 PE=1 SV=2	1.27548e+06	1.43088e+06	1.40754e+06	1.2528e+06	1.39538e+06	1.31708e+06	1.06296e+06	1.08058e+06	1.05526e+06	1.10883e+06	1.07964e+06	1.13498e+06	920458	1.0553e+06	888920	911525	895603	884125	1.05405e+06	1.08994e+06	1.03123e+06	1.11242e+06	1.00995e+06	1.12186e+06	1.01373e+06	1.279e+06	1.08728e+06	1.19102e+06	1.09304e+06	1.24909e+06	792534	1.08058e+06	877638	1.11143e+06	926451	1.14605e+06	492550	613003	501316	627841	506113
Q9WUM3	15	15	1054.92	6.10073e-10	1.31942	Condition 2	Condition 3	Coronin-1B OS=Mus musculus GN=Coro1b PE=1 SV=1	4.70963e+06	4.90437e+06	5.273e+06	5.06708e+06	5.26466e+06	4.74206e+06	5.02368e+06	4.82767e+06	5.16694e+06	5.71135e+06	5.19525e+06	5.1711e+06	4.13227e+06	3.65003e+06	3.99182e+06	3.93996e+06	4.03522e+06	3.81856e+06	4.07385e+06	3.97777e+06	3.91059e+06	3.91632e+06	4.26513e+06	4.09018e+06	3.74314e+06	4.38381e+06	4.07322e+06	4.81719e+06	4.12398e+06	4.49727e+06	3.74561e+06	4.82767e+06	4.29726e+06	5.72475e+06	4.45812e+06	5.22152e+06	2.21124e+06	2.12022e+06	2.25123e+06	2.71377e+06	2.28034e+06
Q68FD5	100	98	10585.9	6.19134e-10	1.41194	Condition 1	Condition 3	Clathrin heavy chain 1 OS=Mus musculus GN=Cltc PE=1 SV=3	6.1279e+07	6.24382e+07	6.44978e+07	6.30839e+07	6.23848e+07	6.32805e+07	5.28355e+07	4.82868e+07	4.8236e+07	4.9309e+07	5.13004e+07	4.66181e+07	4.96336e+07	3.9692e+07	4.34807e+07	4.36633e+07	4.58981e+07	4.46154e+07	4.77237e+07	4.96646e+07	4.73194e+07	4.74632e+07	5.24311e+07	4.93212e+07	4.87036e+07	5.5811e+07	4.98224e+07	5.99728e+07	4.88681e+07	6.00139e+07	3.93936e+07	4.82868e+07	4.0117e+07	4.94247e+07	4.40216e+07	4.70727e+07	2.65596e+07	2.30562e+07	2.45214e+07	3.00744e+07	2.59374e+07
P84104	5	5	439.68	6.19823e-10	1.52397	Condition 3	Condition 4	Serine/arginine-rich splicing factor 3 OS=Mus musculus GN=Srsf3 PE=1 SV=1	5.22919e+06	5.22598e+06	5.33393e+06	5.26853e+06	5.29122e+06	4.93908e+06	5.83716e+06	5.33616e+06	6.09397e+06	5.62906e+06	5.95628e+06	6.1053e+06	5.85426e+06	7.54063e+06	6.11626e+06	5.87698e+06	5.82037e+06	5.96051e+06	4.14426e+06	4.11698e+06	3.99666e+06	3.99603e+06	4.25185e+06	3.88373e+06	4.15608e+06	4.67129e+06	4.12028e+06	5.00871e+06	4.14479e+06	4.68412e+06	4.35214e+06	5.33616e+06	5.06825e+06	5.64227e+06	5.11116e+06	6.16482e+06	3.1327e+06	4.38018e+06	3.44933e+06	4.04795e+06	3.28914e+06
P50580	15	15	848.96	6.23928e-10	1.28185	Condition 1	Condition 4	Proliferation-associated protein 2G4 OS=Mus musculus GN=Pa2g4 PE=1 SV=3	3.7392e+06	3.93698e+06	3.92076e+06	3.81154e+06	3.72463e+06	3.84489e+06	3.575e+06	3.56536e+06	3.41161e+06	3.75709e+06	3.58116e+06	3.648e+06	3.29287e+06	3.68112e+06	3.25863e+06	3.22838e+06	3.41837e+06	3.27216e+06	3.02879e+06	3.05905e+06	3.07169e+06	2.92346e+06	2.98769e+06	2.85499e+06	2.97186e+06	3.5191e+06	3.02866e+06	3.62357e+06	2.91763e+06	3.64642e+06	2.66548e+06	3.56536e+06	2.83738e+06	3.7659e+06	3.07304e+06	3.68357e+06	1.76206e+06	2.13828e+06	1.83774e+06	2.22365e+06	1.93175e+06
Q91WS0	1	1	42.32	6.72134e-10	2.71313	Condition 4	Condition 1	CDGSH iron-sulfur domain-containing protein 1 OS=Mus musculus GN=Cisd1 PE=1 SV=1	63294.6	51324.7	44664	67312.1	43627.6	69348.4	95141.9	82965.6	85889.2	99284.1	87332.2	95275.7	103335	107958	104216	120594	118502	102065	119447	148894	157224	168480	184841	142416	50305.6	45877.1	34501.4	63992.5	34174.9	65768.6	70936.9	82965.6	71432.5	99517.1	74940.9	96204.6	55296	62710.6	58773.7	83063	66966.8
P70255	1	1	98.28	6.7309e-10	1.90219	Condition 2	Condition 4	Nuclear factor 1 C-type OS=Mus musculus GN=Nfic PE=1 SV=1	614098	588999	544002	593669	727066	526021	911534	982883	1.10073e+06	1.22001e+06	1.12587e+06	1.16056e+06	878534	765431	988675	881114	875925	935864	555013	525083	558807	505798	647665	625583	488075	526482	420223	564391	569535	498867	679631	982883	915458	1.22288e+06	966121	1.17187e+06	470117	444622	557574	606895	494993
Q62093	1	1	105.8	6.75801e-10	1.92789	Condition 1	Condition 4	Serine/arginine-rich splicing factor 2 OS=Mus musculus GN=Srsf2 PE=1 SV=4	826587	956100	832278	884349	824008	766062	661926	726094	634063	675988	661065	667762	719814	1.057e+06	681186	728122	765994	759634	399280	448516	448015	431036	486092	426928	656959	854618	642907	840735	645472	726516	493526	726094	527339	677575	567268	674273	385183	613988	384162	501516	432870
Q91X97	4	3	300.16	6.77126e-10	1.7153	Condition 1	Condition 4	Neurocalcin-delta OS=Mus musculus GN=Ncald PE=1 SV=4	641756	628938	652270	611470	604028	611863	408506	459170	417991	473874	406738	446105	384844	527437	380236	413454	390506	378324	382189	359008	353014	365112	382559	344517	510058	562182	503857	581315	473155	580278	304578	459170	347636	474986	349027	450455	205936	306377	214438	284779	220678
Q921M3	24	23	1520.95	6.81796e-10	1.47236	Condition 4	Condition 1	Splicing factor 3B subunit 3 OS=Mus musculus GN=Sf3b3 PE=1 SV=1	1.3266e+06	1.2631e+06	1.1955e+06	1.30456e+06	1.30514e+06	1.14625e+06	1.79925e+06	1.77466e+06	1.65515e+06	1.77183e+06	1.57134e+06	1.84421e+06	1.72518e+06	2.1038e+06	1.71453e+06	1.71871e+06	1.9015e+06	1.82243e+06	1.78916e+06	1.78937e+06	1.83099e+06	1.86165e+06	1.90847e+06	1.92361e+06	1.05436e+06	1.12903e+06	923486	1.24022e+06	1.02236e+06	1.08708e+06	1.34151e+06	1.77466e+06	1.37656e+06	1.77599e+06	1.34839e+06	1.86219e+06	923167	1.22205e+06	966927	1.18381e+06	1.07455e+06
Q8BWM0	6	5	421.48	6.85136e-10	1.66689	Condition 4	Condition 1	Prostaglandin E synthase 2 OS=Mus musculus GN=Ptges2 PE=1 SV=3	541811	540581	589056	572599	572090	515070	727834	686732	722370	658532	679080	657334	762475	578330	780457	732037	784381	724315	956653	892359	908489	915855	983519	895893	430623	483203	455026	544361	448137	488482	542667	686732	600783	660077	582727	663743	408012	335939	440147	504213	443261
Q9CQU1	2	2	49.26	7.56055e-10	2.04301	Condition 2	Condition 1	Microfibrillar-associated protein 1 OS=Mus musculus GN=Mfap1 PE=1 SV=1	107994	116203	106738	120110	90154.6	125871	203145	238970	243291	231426	217262	228740	185906	207671	213668	174627	165704	212961	185912	211813	224045	232871	171502	228639	85832.2	103869	82451.4	114186	70621.1	119374	151463	238970	202341	231969	186436	230970	99480.9	120632	120500	120280	93640.7
Q8R3F5	3	3	129.58	7.62499e-10	1.69674	Condition 4	Condition 1	Malonyl-CoA-acyl carrier protein transacylase, mitochondrial OS=Mus musculus GN=Mcat PE=1 SV=3	189859	199324	221996	192517	194180	183571	237925	229928	288897	239478	257587	265380	273960	352114	329080	323959	315031	281231	312442	315454	364922	334435	324424	352935	150897	178167	171485	183023	152107	174094	177395	229928	240271	240040	221039	267968	146600	204535	185588	223137	178027
Q9JKC6	3	3	346.2	7.6544e-10	1.7686	Condition 4	Condition 1	Cell cycle exit and neuro0l differentiation protein 1 OS=Mus musculus GN=Cend1 PE=1 SV=1	490042	523901	452829	476513	475170	437952	581615	662185	546880	587488	592924	518121	795473	696349	934261	698597	765567	843353	894945	940804	832958	797939	739121	846072	389477	468293	349795	453013	372216	415344	433647	662185	454830	588867	508796	523173	425669	404494	526886	481180	432629
P42125	4	4	193	7.71989e-10	1.5186	Condition 3	Condition 1	Enoyl-CoA delta isomerase 1, mitochondrial OS=Mus musculus GN=Eci1 PE=1 SV=2	546849	566521	513040	540383	512858	591291	695746	720407	656858	761699	724027	709226	934487	862393	724224	831594	851762	762788	846911	820394	844623	780818	770071	771680	434627	506390	396306	513733	401738	560768	518742	720407	546297	763487	621297	716140	500058	500945	408434	572786	481338
O08583	7	7	631.44	7.86705e-10	1.34243	Condition 3	Condition 1	THO complex subunit 4 OS=Mus musculus GN=Alyref PE=1 SV=3	4.77662e+06	4.8952e+06	4.8681e+06	4.87781e+06	4.85515e+06	4.68258e+06	5.37118e+06	5.78558e+06	5.44511e+06	5.32181e+06	5.72094e+06	4.84132e+06	6.40125e+06	6.60395e+06	6.20665e+06	6.55047e+06	6.61157e+06	6.49677e+06	5.80785e+06	5.8748e+06	5.87136e+06	5.82075e+06	5.62309e+06	5.29813e+06	3.79638e+06	4.37562e+06	3.76045e+06	4.63725e+06	3.8032e+06	4.44086e+06	4.0047e+06	5.78558e+06	4.5286e+06	5.3343e+06	4.90922e+06	4.88852e+06	3.4254e+06	3.83609e+06	3.5003e+06	4.51184e+06	3.73626e+06
Q6A068	24	24	1420.65	7.97946e-10	1.45747	Condition 3	Condition 1	Cell division cycle 5-like protein OS=Mus musculus GN=Cdc5l PE=1 SV=2	1.07456e+06	1.15121e+06	1.13385e+06	1.15643e+06	1.10801e+06	1.14398e+06	1.52511e+06	1.49962e+06	1.46532e+06	1.46106e+06	1.84459e+06	1.58598e+06	1.66205e+06	1.73503e+06	1.5856e+06	1.71563e+06	1.61273e+06	1.55313e+06	1.5442e+06	1.75664e+06	1.5673e+06	1.58749e+06	1.7711e+06	1.58179e+06	854043	1.02902e+06	875858	1.0994e+06	867939	1.08492e+06	1.1371e+06	1.49962e+06	1.21868e+06	1.46449e+06	1.58287e+06	1.60144e+06	889390	1.00784e+06	894214	1.1817e+06	911368
Q9D819	11	11	739.17	8.042e-10	1.35909	Condition 1	Condition 2	Inorganic pyrophosphatase OS=Mus musculus GN=Ppa1 PE=1 SV=1	1.81029e+06	1.83101e+06	1.85001e+06	1.81409e+06	1.74907e+06	1.79068e+06	1.38296e+06	1.34676e+06	1.28388e+06	1.32328e+06	1.32123e+06	1.32159e+06	1.42291e+06	1.66182e+06	1.54562e+06	1.62894e+06	1.39445e+06	1.57439e+06	1.54221e+06	1.49847e+06	1.479e+06	1.5507e+06	1.52836e+06	1.433e+06	1.43879e+06	1.63667e+06	1.42907e+06	1.72462e+06	1.3701e+06	1.69824e+06	1.03112e+06	1.34676e+06	1.06778e+06	1.32639e+06	1.13376e+06	1.33448e+06	761422	965314	871669	1.12198e+06	788017
Q63ZW7	2	2	124.34	8.12797e-10	2.46932	Condition 3	Condition 1	I0D-like protein OS=Mus musculus GN=Patj PE=1 SV=2	67295	60172.8	51015.2	70756.4	58705.1	53479.5	137230	129650	146250	122632	152040	108420	146419	115481	186425	160994	144188	138966	123260	117203	123505	112930	156228	108334	53485	53786	39407.5	67266.9	45985.6	50718.9	102318	129650	121633	122919	130468	109477	78350.9	67080.5	105136	110889	81481.9
Q8BH66	11	11	679.71	8.16837e-10	1.69755	Condition 1	Condition 2	Atlastin-1 OS=Mus musculus GN=Atl1 PE=1 SV=1	814117	779025	896742	816299	828501	874848	563653	481961	483207	535619	485965	400633	547353	493189	498285	490344	596243	507197	574835	661609	605289	605154	579857	591720	647047	696339	692703	776042	648992	829687	420255	481961	401875	536876	417013	404539	292896	286483	281013	337740	336942
Q9JJD0	1	1	47.68	8.27643e-10	1.96694	Condition 3	Condition 1	THAP domain-containing protein 11 OS=Mus musculus GN=Thap11 PE=1 SV=1	37679.7	39874.7	42832	41386.6	32836.3	34652.4	55699.3	59042.3	70650.8	66239.3	74383.6	65571.4	74884.1	73435.6	79185	69753.8	87198.1	66487.7	60645.6	78348	71298.9	67159.8	73088	62480.5	29947.2	35642.3	33086.3	39345.6	25721.8	32863.6	41528.9	59042.3	58759.1	66394.7	63829.6	66210.7	40071.6	42657.1	44657.2	48045.1	49276.4
P97382	2	2	95.29	8.39964e-10	1.61803	Condition 1	Condition 4	Voltage-gated potassium channel subunit beta-3 OS=Mus musculus GN=Kc0b3 PE=1 SV=1	405583	342985	436543	440813	365854	342226	342483	335147	354717	333937	346917	346022	272142	238772	257172	285046	248145	257794	254931	224196	263108	245369	223410	231482	322351	306580	337215	419074	286586	324559	255353	335147	295011	334720	297694	349396	145627	138697	145035	196334	140229
Q8BGT8	5	5	288.44	8.54635e-10	1.45863	Condition 1	Condition 2	Phytanoyl-CoA hydroxylase-interacting protein-like OS=Mus musculus GN=Phyhipl PE=1 SV=1	741613	787333	711913	712859	707657	675338	483209	546095	465544	509792	512447	456053	722653	672242	658803	648475	653086	609788	653267	597256	654194	627223	615364	623496	589422	703765	549929	677703	554330	640476	360276	546095	387184	510988	439738	460499	386702	390491	371539	446657	369065
Q03137	1	1	54.11	8.6623e-10	1.80297	Condition 1	Condition 3	Ephrin type-A receptor 4 OS=Mus musculus GN=Epha4 PE=1 SV=2	213795	238836	251594	231265	220273	204114	131785	116723	128067	126257	139575	138720	126923	144919	136074	121474	123928	100924	160602	150455	130290	131198	153830	147289	169921	213486	194348	219860	172547	193577	98257.6	116723	106511	126554	119771	140073	67918.5	84180.2	76740.4	83668.8	70032.8
Q9WUA3	29	29	2656.08	9.15102e-10	1.36552	Condition 1	Condition 3	ATP-dependent 6-phosphofructoki0se, platelet type OS=Mus musculus GN=Pfkp PE=1 SV=1	4.49907e+06	4.38111e+06	4.78995e+06	4.79624e+06	4.66496e+06	4.57528e+06	3.55543e+06	3.73282e+06	3.68499e+06	3.54454e+06	3.71928e+06	3.70441e+06	3.08718e+06	3.73987e+06	3.25597e+06	3.32009e+06	3.54322e+06	3.34385e+06	3.73874e+06	3.97884e+06	3.77875e+06	3.85617e+06	3.86339e+06	3.54382e+06	3.57579e+06	3.9161e+06	3.70008e+06	4.55971e+06	3.65422e+06	4.3391e+06	2.6509e+06	3.73282e+06	3.06474e+06	3.55286e+06	3.19157e+06	3.74053e+06	1.65199e+06	2.17241e+06	1.83624e+06	2.28681e+06	2.00231e+06
A2APY7	1	1	54.29	9.18687e-10	1.58059	Condition 4	Condition 1	Arginine-hydroxylase NDUFAF5, mitochondrial OS=Mus musculus GN=Ndufaf5 PE=1 SV=1	154320	147959	126979	143679	139801	141257	178714	162544	167122	180502	195071	176676	199135	178106	197255	203670	212961	193148	208543	232507	220992	211523	252012	224240	122652	132255	98086.8	136593	109510	133965	133247	162544	138993	180926	167393	178399	106560	103458	111244	140284	120346
Q6PCP5	1	1	33.73	9.44177e-10	1.75215	Condition 4	Condition 1	Mitochondrial fission factor OS=Mus musculus GN=Mff PE=1 SV=1	367206	457165	383866	409980	361312	373610	519058	593132	530541	528663	515524	528564	589459	504964	580042	520257	596464	557270	642450	644943	797151	641901	741864	654748	291849	408641	296523	389761	283027	354324	387005	593132	441242	529904	442378	533717	315428	293323	327121	358343	337067
P99024	6	5	940.4	9.53103e-10	1.30489	Condition 4	Condition 2	Tubulin beta-5 chain OS=Mus musculus GN=Tubb5 PE=1 SV=1	3.13917e+07	3.18587e+07	3.21062e+07	3.14091e+07	2.99276e+07	3.0724e+07	2.56879e+07	2.44046e+07	2.43425e+07	2.56799e+07	2.44434e+07	2.55458e+07	2.81067e+07	3.0312e+07	2.71935e+07	2.75813e+07	2.64345e+07	2.51913e+07	3.18157e+07	3.2417e+07	3.39427e+07	3.25707e+07	3.41025e+07	3.10212e+07	2.49497e+07	2.84772e+07	2.48009e+07	2.98601e+07	2.34433e+07	2.9138e+07	1.91527e+07	2.44046e+07	2.02452e+07	2.57402e+07	2.09752e+07	2.57948e+07	1.50403e+07	1.76076e+07	1.53361e+07	1.89975e+07	1.49384e+07
Q921J2	3	3	226.2	9.65912e-10	1.48718	Condition 1	Condition 3	GTP-binding protein Rheb OS=Mus musculus GN=Rheb PE=1 SV=1	651981	694996	707691	685492	579703	676971	404186	476796	423329	449346	461929	479227	468959	446883	410291	473775	438953	448668	465238	490439	502490	512733	450687	519604	518184	621229	546668	651686	454100	642025	301358	476796	352075	450400	396387	483899	250947	259584	231388	326327	248056
Q6P1F6	11	11	791.56	9.68232e-10	1.49829	Condition 1	Condition 3	Serine/threonine-protein phosphatase 2A 55 kDa regulatory subunit B alpha isoform OS=Mus musculus GN=Ppp2r2a PE=1 SV=1	2.28421e+06	2.14323e+06	2.2887e+06	2.07878e+06	2.20781e+06	2.09498e+06	1.90031e+06	1.75013e+06	1.63691e+06	1.55348e+06	1.76911e+06	1.85508e+06	1.45716e+06	1.53645e+06	1.39333e+06	1.42419e+06	1.47488e+06	1.45579e+06	1.72182e+06	1.65583e+06	1.59983e+06	1.60295e+06	1.89102e+06	1.6646e+06	1.81545e+06	1.91575e+06	1.76794e+06	1.97626e+06	1.72945e+06	1.98683e+06	1.41686e+06	1.75013e+06	1.36139e+06	1.55712e+06	1.51809e+06	1.87316e+06	779748	892488	785781	980954	833467
P58269	1	1	27.42	1.0405e-09	2.42072	Condition 2	Condition 1	Zinc finger protein DPF3 OS=Mus musculus GN=Dpf3 PE=1 SV=2	146996	146345	125104	181728	175434	179243	337982	429826	368258	400289	307724	467347	342024	382982	337999	318942	297894	311440	190973	231945	268053	182221	196823	209883	116830	130812	96638.8	172766	137423	169990	251997	429826	306274	401229	264062	471903	183022	222466	190618	219681	168343
Q9JJZ2	23	22	2548.26	1.06354e-09	1.39154	Condition 1	Condition 2	Tubulin alpha-8 chain OS=Mus musculus GN=Tuba8 PE=1 SV=1	3.14766e+08	3.1911e+08	3.06944e+08	2.99111e+08	2.73182e+08	3.07855e+08	2.22073e+08	2.20456e+08	2.09428e+08	2.193e+08	2.13779e+08	2.23566e+08	2.49781e+08	2.78105e+08	2.30869e+08	2.44262e+08	2.4643e+08	2.5751e+08	2.48151e+08	2.6011e+08	2.49393e+08	2.39143e+08	2.50802e+08	2.51691e+08	2.50171e+08	2.85239e+08	2.37104e+08	2.84359e+08	2.13992e+08	2.91963e+08	1.65575e+08	2.20456e+08	1.74178e+08	2.19815e+08	1.83446e+08	2.25746e+08	1.33662e+08	1.61545e+08	1.30201e+08	1.68243e+08	1.3926e+08
Q61578	3	3	139.01	1.14562e-09	1.96373	Condition 4	Condition 1	0DPH:adrenodoxin oxidoreductase, mitochondrial OS=Mus musculus GN=Fdxr PE=1 SV=1	217623	209562	174326	205531	173896	225701	293756	270035	260768	304524	253256	220875	336289	383554	363044	354446	407173	299828	370110	426950	414172	423425	369213	365646	172963	187319	134661	195395	136218	214050	219022	270035	216876	305238	217322	223029	179953	222798	204742	244136	230097
Q8CGY8	20	19	1434.38	1.16229e-09	1.30449	Condition 1	Condition 3	UDP-N-acetylglucosamine--peptide N-acetylglucosaminyltransferase 110 kDa subunit OS=Mus musculus GN=Ogt PE=1 SV=2	1.59595e+06	1.74773e+06	1.82428e+06	1.72082e+06	1.74955e+06	1.6876e+06	1.50766e+06	1.43369e+06	1.37201e+06	1.46189e+06	1.34614e+06	1.46595e+06	1.35342e+06	1.37057e+06	1.24583e+06	1.33189e+06	1.31464e+06	1.29929e+06	1.34088e+06	1.29669e+06	1.36878e+06	1.36539e+06	1.38879e+06	1.23439e+06	1.26843e+06	1.56222e+06	1.40919e+06	1.63596e+06	1.37048e+06	1.60048e+06	1.1241e+06	1.43369e+06	1.14108e+06	1.46532e+06	1.15514e+06	1.48024e+06	724235	796134	702600	917381	742917
D3YVF0	15	15	1023.65	1.16684e-09	1.32914	Condition 4	Condition 3	A-ki0se anchor protein 5 OS=Mus musculus GN=Akap5 PE=1 SV=2	1.89829e+06	2.07742e+06	1.98539e+06	1.96303e+06	1.85053e+06	2.02324e+06	1.51042e+06	1.57036e+06	1.52209e+06	1.59337e+06	1.64627e+06	1.61765e+06	1.5267e+06	1.58661e+06	1.45011e+06	1.58561e+06	1.43096e+06	1.48915e+06	1.95238e+06	2.08402e+06	1.97271e+06	1.97112e+06	1.82404e+06	2.24986e+06	1.50873e+06	1.85692e+06	1.53365e+06	1.86622e+06	1.44958e+06	1.9188e+06	1.12616e+06	1.57036e+06	1.26589e+06	1.59711e+06	1.41269e+06	1.63343e+06	816960	921626	817805	1.09213e+06	808650
Q4VAA2	6	6	282.17	1.19418e-09	1.43888	Condition 1	Condition 4	Protein CDV3 OS=Mus musculus GN=Cdv3 PE=1 SV=2	1.95319e+06	2.19995e+06	2.07945e+06	2.04063e+06	1.97431e+06	1.95794e+06	1.72151e+06	1.72138e+06	1.70357e+06	1.71073e+06	1.58698e+06	1.68904e+06	1.74084e+06	1.67524e+06	1.67194e+06	1.48784e+06	1.57932e+06	1.71748e+06	1.42031e+06	1.48924e+06	1.28431e+06	1.35918e+06	1.51673e+06	1.41282e+06	1.55237e+06	1.96645e+06	1.6063e+06	1.94e+06	1.54654e+06	1.85687e+06	1.28354e+06	1.72138e+06	1.41683e+06	1.71475e+06	1.36181e+06	1.70551e+06	931549	973108	942907	1.0248e+06	892487
Q64514	23	23	1435.1	1.19434e-09	1.36081	Condition 1	Condition 2	Tripeptidyl-peptidase 2 OS=Mus musculus GN=Tpp2 PE=1 SV=3	1.31834e+06	1.43313e+06	1.39764e+06	1.4422e+06	1.3705e+06	1.37608e+06	1.05822e+06	1.04623e+06	1.01576e+06	1.06708e+06	961176	978664	1.27962e+06	1.51837e+06	1.24005e+06	1.29098e+06	1.2762e+06	1.30827e+06	1.22112e+06	1.25428e+06	1.24523e+06	1.2503e+06	1.2487e+06	1.26753e+06	1.0478e+06	1.28102e+06	1.07963e+06	1.37107e+06	1.07356e+06	1.30504e+06	789002	1.04623e+06	844794	1.06958e+06	824798	988206	684743	881988	699341	889200	721194
Q9JKY5	15	15	1062.8	1.20459e-09	1.33961	Condition 1	Condition 3	Huntingtin-interacting protein 1-related protein OS=Mus musculus GN=Hip1r PE=1 SV=2	1.56934e+06	1.6994e+06	1.51285e+06	1.54142e+06	1.47332e+06	1.47626e+06	1.35267e+06	1.33032e+06	1.25218e+06	1.33754e+06	1.35901e+06	1.34667e+06	1.18734e+06	1.08647e+06	1.15621e+06	1.20331e+06	1.17065e+06	1.11785e+06	1.16887e+06	1.24537e+06	1.16105e+06	1.14615e+06	1.25649e+06	1.08114e+06	1.24729e+06	1.51903e+06	1.16862e+06	1.4654e+06	1.1541e+06	1.40005e+06	1.00854e+06	1.33032e+06	1.04142e+06	1.34068e+06	1.16618e+06	1.3598e+06	635364	631105	652058	828818	661547
Q9D3E6	3	2	143.85	1.21908e-09	3.48152	Condition 2	Condition 1	Cohesin subunit SA-1 OS=Mus musculus GN=Stag1 PE=1 SV=3	37860.3	35947.9	32245.9	47927	51373.6	44050.5	184230	157731	158610	95575.3	129957	142205	75410.4	134723	109688	108684	90371.4	84088.3	120157	107527	134521	102103	117659	127476	30090.8	32132.4	24908.9	45563.4	40242.6	41776.5	137360	157731	131913	95799.6	111518	143592	40353.2	78257.5	61859.7	74859.7	51069.7
P16332	8	8	679.73	1.22215e-09	1.76894	Condition 4	Condition 1	Methylmalonyl-CoA mutase, mitochondrial OS=Mus musculus GN=Mut PE=1 SV=2	451249	494180	490754	503808	479335	477901	661236	679348	566663	697059	586302	595720	804998	1.08186e+06	763359	717951	791989	793972	832665	914466	803361	881512	879488	813517	358645	441727	379091	478961	375479	453231	493011	679348	471284	698695	503114	601528	430766	628431	430504	494510	447560
P09671	9	8	1099.16	1.22431e-09	1.31935	Condition 4	Condition 1	Superoxide dismutase [Mn], mitochondrial OS=Mus musculus GN=Sod2 PE=1 SV=3	1.60777e+07	1.5798e+07	1.70784e+07	1.62363e+07	1.58232e+07	1.54311e+07	1.81576e+07	1.7348e+07	1.86959e+07	1.74142e+07	1.81187e+07	1.71528e+07	2.01484e+07	1.69864e+07	1.88622e+07	1.86927e+07	1.94995e+07	1.94334e+07	2.10211e+07	2.16502e+07	2.13518e+07	2.16544e+07	2.0962e+07	2.06044e+07	1.27783e+07	1.41212e+07	1.31925e+07	1.54355e+07	1.23948e+07	1.46345e+07	1.35381e+07	1.7348e+07	1.5549e+07	1.74551e+07	1.55479e+07	1.732e+07	1.07817e+07	9.86701e+06	1.06375e+07	1.28752e+07	1.10194e+07
Q925N0	4	4	164.67	1.24453e-09	4.22179	Condition 4	Condition 1	Sideroflexin-5 OS=Mus musculus GN=Sfxn5 PE=1 SV=2	77735.6	58972.5	47230.7	41772.8	87554.2	65270.7	185870	164869	181345	98502.2	178517	181002	155874	144052	189785	179781	127132	127154	282940	245513	280269	272689	265442	251251	61783	52713.1	36484.1	39712.7	68584.1	61901.3	138583	164869	150822	98733.4	153187	182767	83410.4	83676.4	107031	123830	71843.4
P70392	16	15	944	1.24935e-09	1.67955	Condition 1	Condition 2	Ras-specific guanine nucleotide-releasing factor 2 OS=Mus musculus GN=Rasgrf2 PE=1 SV=2	893488	903672	963757	891757	852828	857097	573611	487094	538457	489500	559405	544814	643297	469151	615185	597138	603544	650277	687868	662208	683502	622447	642867	620319	710130	807756	744470	847779	668048	812852	427679	487094	447825	490649	480033	550125	344237	272519	346940	411297	341068
P54869	2	2	97.32	1.2906e-09	10.2514	Condition 4	Condition 1	Hydroxymethylglutaryl-CoA synthase, mitochondrial OS=Mus musculus GN=Hmgcs2 PE=1 SV=2	24918.5	10399	19445.5	23383.8	6708.14	6696.59	19230.6	14259.4	32809.9	27789.3	22588.1	14759.5	71935.2	58187	104174	94789.4	97450.9	56465.7	147300	169561	165883	201675	108508	145603	19804.9	9295.27	15021	22230.6	5254.7	6350.91	14338.1	14259.4	27287.4	27854.6	19383.2	14903.4	38493.6	33799.5	58749.9	65289.1	55070.4
Q8BW96	6	6	272.91	1.29774e-09	1.70146	Condition 1	Condition 2	Calcium/calmodulin-dependent protein ki0se type 1D OS=Mus musculus GN=Camk1d PE=1 SV=2	458257	502776	469371	492575	449040	471468	276339	268794	273131	279174	327839	245930	277908	284216	336175	298413	336859	306728	357474	310188	377456	319415	312092	302751	364216	449411	362573	468282	351748	447130	206036	268794	227158	279830	281323	248328	148713	165095	189589	205541	190362
Q60829	8	8	558.72	1.31743e-09	1.44811	Condition 1	Condition 3	Protein phosphatase 1 regulatory subunit 1B OS=Mus musculus GN=Ppp1r1b PE=1 SV=2	3.17854e+06	3.5551e+06	3.05562e+06	3.133e+06	2.82838e+06	3.06586e+06	2.58837e+06	2.65474e+06	2.63316e+06	2.58711e+06	2.69537e+06	2.62634e+06	2.1135e+06	2.20359e+06	2.24253e+06	2.12506e+06	2.08187e+06	2.22731e+06	2.41035e+06	2.42318e+06	2.54092e+06	2.42147e+06	2.08015e+06	2.43548e+06	2.52626e+06	3.17776e+06	2.36037e+06	2.97849e+06	2.21556e+06	2.90759e+06	1.92987e+06	2.65474e+06	2.18995e+06	2.59318e+06	2.31293e+06	2.65195e+06	1.13096e+06	1.28002e+06	1.2647e+06	1.4637e+06	1.17648e+06
Q9Z0R4	19	18	1292.88	1.32113e-09	1.44876	Condition 1	Condition 4	Intersectin-1 OS=Mus musculus GN=Itsn1 PE=1 SV=2	2.34027e+06	2.46502e+06	2.62294e+06	2.59476e+06	2.77295e+06	2.86871e+06	2.35398e+06	2.34683e+06	2.71777e+06	2.45951e+06	2.49851e+06	2.57924e+06	2.11795e+06	1.97908e+06	1.83259e+06	1.88349e+06	1.82318e+06	2.021e+06	1.67349e+06	1.84906e+06	1.86913e+06	1.74387e+06	1.94386e+06	1.73307e+06	1.86001e+06	2.20338e+06	2.02613e+06	2.46679e+06	2.17215e+06	2.72062e+06	1.75511e+06	2.34683e+06	2.26032e+06	2.46528e+06	2.144e+06	2.60439e+06	1.13334e+06	1.1496e+06	1.03351e+06	1.29731e+06	1.03029e+06
Q9DCW4	12	12	1079.47	1.35526e-09	1.2532	Condition 3	Condition 1	Electron transfer flavoprotein subunit beta OS=Mus musculus GN=Etfb PE=1 SV=3	4.82686e+06	4.87584e+06	4.7224e+06	4.56666e+06	4.56954e+06	4.63393e+06	4.94727e+06	5.38819e+06	5.02377e+06	5.00145e+06	5.17598e+06	5.12841e+06	6.2618e+06	5.99524e+06	5.38457e+06	5.90928e+06	5.75745e+06	6.02605e+06	5.70161e+06	5.65555e+06	5.93237e+06	5.917e+06	5.61285e+06	5.57932e+06	3.83631e+06	4.35831e+06	3.64789e+06	4.34145e+06	3.57947e+06	4.39472e+06	3.68864e+06	5.38819e+06	4.17818e+06	5.01319e+06	4.44157e+06	5.17841e+06	3.35078e+06	3.4825e+06	3.03668e+06	4.0702e+06	3.25359e+06
P47915	1	1	64.92	1.37915e-09	2.67828	Condition 1	Condition 4	60S ribosomal protein L29 OS=Mus musculus GN=Rpl29 PE=2 SV=2	303588	405963	284596	285662	282489	316166	121221	174227	158244	114834	169668	163296	154277	143922	170545	155843	171279	164424	143352	120555	124572	108323	88030.1	116538	241287	362874	219841	271575	221282	299845	90381.6	174227	131609	115103	145595	164888	82556.1	83601.4	96180.9	107341	96791.4
Q62136	1	1	17.05	1.38334e-09	1.7294	Condition 3	Condition 1	Tyrosine-protein phosphatase non-receptor type 21 OS=Mus musculus GN=Ptpn21 PE=1 SV=1	368909	411984	349642	323004	356532	391592	502692	536190	534081	451439	528288	533439	627203	613264	594106	710595	595690	666703	447257	529529	478101	547391	510666	556406	293203	368255	270087	307075	279283	371377	374802	536190	444185	452499	453331	538640	335625	356231	335053	489444	336630
Q8BXR1	1	1	84.26	1.39561e-09	1.77736	Condition 4	Condition 2	Probable cationic amino acid transporter OS=Mus musculus GN=Slc7a14 PE=1 SV=1	276664	324331	369931	352495	314189	316262	185785	216570	235984	186424	191184	233341	313143	273466	288376	281231	284497	283329	342192	383232	391786	345185	393180	364860	219888	289906	285759	335111	246115	299937	138520	216570	196263	186862	164058	235616	167567	158850	162632	193706	160772
Q91VZ6	4	4	254.26	1.40165e-09	1.36637	Condition 1	Condition 2	Stromal membrane-associated protein 1 OS=Mus musculus GN=Smap1 PE=1 SV=1	915724	866658	912310	874340	827965	845366	651880	619167	653387	638706	641556	632011	689818	726599	659913	744218	697472	700827	663367	793394	693401	730414	671084	709013	727803	774671	704729	831221	648572	801727	486036	619167	543410	640205	550527	638173	369132	422065	372165	512603	394148
Q8CCT4	6	6	356.89	1.40228e-09	1.48172	Condition 1	Condition 4	Transcription elongation factor A protein-like 5 OS=Mus musculus GN=Tceal5 PE=1 SV=1	1.45573e+06	1.55205e+06	1.52012e+06	1.49225e+06	1.43139e+06	1.40657e+06	1.11864e+06	1.26538e+06	1.17125e+06	1.22087e+06	1.19621e+06	1.15804e+06	1.2043e+06	1.02405e+06	1.09072e+06	1.26434e+06	1.27185e+06	1.08894e+06	1.00224e+06	942859	1.00264e+06	987514	1.00783e+06	1.0352e+06	1.15699e+06	1.38731e+06	1.17425e+06	1.41866e+06	1.12126e+06	1.33396e+06	834045	1.26538e+06	974110	1.22374e+06	1.02648e+06	1.16933e+06	644439	594850	615121	870853	718734
Q812A2	11	11	567.91	1.4192e-09	1.40972	Condition 1	Condition 4	SLIT-ROBO Rho GTPase-activating protein 3 OS=Mus musculus GN=Srgap3 PE=1 SV=1	699316	729137	716395	789596	696542	765446	651403	649308	649449	654997	698999	768190	592049	560929	568738	529048	562857	603884	508120	550527	491895	547452	521985	498687	555806	651745	553391	750656	545624	725933	485680	649308	540136	656534	599820	775680	316814	325831	320746	364398	318076
Q91WK5	2	2	158.73	1.49969e-09	1.52354	Condition 3	Condition 1	Glycine cleavage system H protein, mitochondrial OS=Mus musculus GN=Gcsh PE=1 SV=2	1.85982e+06	1.95879e+06	1.85078e+06	1.91857e+06	1.98931e+06	1.86129e+06	2.21611e+06	2.10326e+06	1.80041e+06	2.07528e+06	2.12527e+06	2.00241e+06	2.92621e+06	3.5026e+06	2.89399e+06	2.85223e+06	2.73811e+06	2.51399e+06	2.79199e+06	2.59621e+06	2.62899e+06	2.58802e+06	2.7518e+06	2.63008e+06	1.47816e+06	1.75088e+06	1.42967e+06	1.82395e+06	1.55829e+06	1.76521e+06	1.65231e+06	2.10326e+06	1.49737e+06	2.08015e+06	1.82372e+06	2.02193e+06	1.56586e+06	2.03459e+06	1.6321e+06	1.96456e+06	1.54733e+06
Q9DBJ1	21	21	2541.57	1.5171e-09	1.31801	Condition 1	Condition 2	Phosphoglycerate mutase 1 OS=Mus musculus GN=Pgam1 PE=1 SV=3	3.25806e+07	3.16628e+07	3.16644e+07	3.17268e+07	3.16904e+07	2.91145e+07	2.41162e+07	2.30131e+07	2.41924e+07	2.3838e+07	2.43482e+07	2.34644e+07	2.58917e+07	2.1669e+07	2.49158e+07	2.52033e+07	2.55318e+07	2.50585e+07	2.43855e+07	2.56735e+07	2.48611e+07	2.31996e+07	2.52405e+07	2.3467e+07	2.58946e+07	2.83021e+07	2.44597e+07	3.01621e+07	2.48241e+07	2.76116e+07	1.79809e+07	2.30131e+07	2.01204e+07	2.38939e+07	2.08935e+07	2.36931e+07	1.3855e+07	1.2587e+07	1.40515e+07	1.73595e+07	1.44283e+07
P63323	6	6	598.85	1.57928e-09	1.28343	Condition 3	Condition 2	40S ribosomal protein S12 OS=Mus musculus GN=Rps12 PE=1 SV=2	2.79328e+06	2.87046e+06	2.7718e+06	2.9002e+06	2.63311e+06	3.00756e+06	2.34689e+06	2.33305e+06	2.20237e+06	2.29116e+06	2.18399e+06	2.11541e+06	2.90326e+06	2.98613e+06	2.72257e+06	2.83539e+06	2.99e+06	2.85418e+06	2.44237e+06	2.55361e+06	2.57691e+06	2.52985e+06	2.39018e+06	2.63904e+06	2.22005e+06	2.56579e+06	2.14113e+06	2.75717e+06	2.0626e+06	2.85231e+06	1.74982e+06	2.33305e+06	1.83167e+06	2.29654e+06	1.87411e+06	2.13604e+06	1.55358e+06	1.73458e+06	1.53542e+06	1.95296e+06	1.68968e+06
Q3UHJ0	34	32	2904.36	1.64242e-09	1.33528	Condition 1	Condition 3	AP2-associated protein ki0se 1 OS=Mus musculus GN=Aak1 PE=1 SV=2	8.03233e+06	7.92107e+06	7.86148e+06	8.08429e+06	7.48615e+06	7.9355e+06	7.16173e+06	6.76634e+06	6.77812e+06	6.80025e+06	6.61264e+06	6.62061e+06	5.86795e+06	6.80166e+06	5.38329e+06	5.67803e+06	6.02135e+06	5.68673e+06	5.93496e+06	6.24174e+06	5.75631e+06	5.88543e+06	6.04146e+06	5.71443e+06	6.38397e+06	7.08032e+06	6.07273e+06	7.6856e+06	5.86415e+06	7.52586e+06	5.33972e+06	6.76634e+06	5.63725e+06	6.81621e+06	5.6744e+06	6.68516e+06	3.14002e+06	3.95093e+06	3.03597e+06	3.91091e+06	3.40272e+06
O88428	2	1	70.92	1.66153e-09	1.83669	Condition 4	Condition 1	Bifunctio0l 3'-phosphoadenosine 5'-phosphosulfate synthase 2 OS=Mus musculus GN=Papss2 PE=1 SV=2	63716.4	68243.8	60366.3	60276.4	73363.2	77641.8	124071	123585	102791	96251.1	122159	107973	90319.8	87086.3	94639	85397.2	79970.6	86358.8	117157	112955	109064	130097	133474	138556	50640.8	61000.4	46631	57303.8	57467.8	73633.8	92506.3	123585	85489.3	96477	104826	109026	48331.4	50586.5	53372.6	58819.9	45192.1
Q9EQF6	22	21	1840.54	1.69521e-09	1.48346	Condition 1	Condition 2	Dihydropyrimidi0se-related protein 5 OS=Mus musculus GN=Dpysl5 PE=1 SV=1	6.26006e+06	6.62464e+06	6.37468e+06	6.31918e+06	6.42564e+06	5.92763e+06	4.02814e+06	4.41195e+06	4.23326e+06	4.57838e+06	4.03711e+06	4.28104e+06	4.55349e+06	5.40752e+06	4.28225e+06	4.0071e+06	4.32819e+06	4.31567e+06	4.53235e+06	4.72385e+06	4.55943e+06	4.42049e+06	4.75976e+06	4.75059e+06	4.9754e+06	5.92149e+06	4.92423e+06	6.00754e+06	5.03341e+06	5.62163e+06	3.00335e+06	4.41195e+06	3.52072e+06	4.58912e+06	3.4643e+06	4.32277e+06	2.43664e+06	3.14111e+06	2.41502e+06	2.76001e+06	2.4459e+06
Q9Z2H2	12	12	801.97	1.69533e-09	1.41951	Condition 1	Condition 4	Regulator of G-protein sig0ling 6 OS=Mus musculus GN=Rgs6 PE=1 SV=2	2.14093e+06	2.38617e+06	2.22716e+06	2.10991e+06	2.04135e+06	2.2876e+06	1.84363e+06	1.87399e+06	1.8527e+06	2.03958e+06	1.93634e+06	2.08953e+06	1.57836e+06	1.7936e+06	1.46268e+06	1.60373e+06	1.46368e+06	1.63563e+06	1.60609e+06	1.50864e+06	1.58434e+06	1.60924e+06	1.47177e+06	1.51403e+06	1.70158e+06	2.1329e+06	1.72041e+06	2.00586e+06	1.59906e+06	2.16951e+06	1.37459e+06	1.87399e+06	1.54086e+06	2.04437e+06	1.6616e+06	2.1099e+06	844605	1.04186e+06	824893	1.10462e+06	827142
P62743	2	2	122.37	1.73922e-09	1.60061	Condition 1	Condition 2	AP-2 complex subunit sigma OS=Mus musculus GN=Ap2s1 PE=1 SV=1	806334	786816	791520	807969	764021	801532	528809	502534	502924	511808	484591	442079	614695	499382	645649	617967	590341	538999	656892	653841	697030	567671	636548	676689	640861	703302	611423	768122	598482	760156	394275	502534	418273	513009	415834	446389	328932	290080	364120	425643	333607
Q8BZH4	5	5	236.8	1.77091e-09	1.57918	Condition 3	Condition 1	Pogo transposable element with ZNF domain OS=Mus musculus GN=Pogz PE=1 SV=2	188931	209522	207344	184382	202212	204229	263224	269817	260382	266192	270429	290951	284112	382016	306902	294545	317098	305003	316329	305874	356435	285161	291217	306619	150159	187283	160166	175289	158399	193687	196257	269817	216555	266817	232059	293787	152033	221905	173080	202877	179195
B9EJA2	14	14	986.26	1.84794e-09	1.36071	Condition 2	Condition 3	Cortactin-binding protein 2 OS=Mus musculus GN=Cttnbp2 PE=1 SV=2	1.27454e+06	1.22501e+06	1.28045e+06	1.23866e+06	1.22195e+06	1.1818e+06	1.31218e+06	1.36512e+06	1.36785e+06	1.51722e+06	1.38643e+06	1.48895e+06	1.04303e+06	1.10245e+06	1.01013e+06	979097	1.03385e+06	1.03244e+06	1.14176e+06	1.06477e+06	1.08043e+06	1.02206e+06	1.20221e+06	1.06026e+06	1.01298e+06	1.09498e+06	989105	1.17757e+06	957196	1.1208e+06	978350	1.36512e+06	1.13762e+06	1.52078e+06	1.18971e+06	1.50347e+06	558143	640386	569672	674383	584240
Q9CQ62	15	15	1109.79	1.88089e-09	1.27895	Condition 4	Condition 1	2,4-dienoyl-CoA reductase, mitochondrial OS=Mus musculus GN=Decr1 PE=1 SV=1	2.44966e+06	2.51244e+06	2.62083e+06	2.7341e+06	2.44589e+06	2.48275e+06	2.78964e+06	2.73909e+06	2.74402e+06	2.80746e+06	2.75217e+06	2.55387e+06	2.93511e+06	3.22289e+06	3.23677e+06	3.03101e+06	3.16509e+06	3.01761e+06	3.3182e+06	3.36998e+06	3.21237e+06	3.15229e+06	3.37456e+06	3.07099e+06	1.94695e+06	2.24577e+06	2.0245e+06	2.59926e+06	1.91595e+06	2.35458e+06	2.07993e+06	2.73909e+06	2.28215e+06	2.81405e+06	2.36167e+06	2.57877e+06	1.57062e+06	1.87211e+06	1.82541e+06	2.0877e+06	1.78862e+06
Q3UYC0	4	4	281.24	1.94168e-09	1.41769	Condition 2	Condition 3	Protein phosphatase 1H OS=Mus musculus GN=Ppm1h PE=1 SV=1	495570	455170	490353	449230	516113	434810	595546	574560	562120	627510	610068	551507	429205	399467	433508	423337	390857	407471	435671	450086	463443	486855	477371	466694	393871	406858	378781	427076	404288	412364	444034	574560	467506	628983	523508	556884	229674	232042	244481	291586	220877
Q8VDN2	44	43	3906.16	1.98475e-09	1.35576	Condition 2	Condition 1	Sodium/potassium-transporting ATPase subunit alpha-1 OS=Mus musculus GN=Atp1a1 PE=1 SV=1	1.89958e+07	1.85565e+07	1.98782e+07	1.83113e+07	1.84634e+07	1.86045e+07	2.65102e+07	2.67292e+07	2.49538e+07	2.55909e+07	2.53936e+07	2.37656e+07	2.44029e+07	2.44756e+07	2.26511e+07	2.17676e+07	2.38485e+07	2.14015e+07	2.25974e+07	2.21512e+07	2.33925e+07	2.19278e+07	2.09926e+07	2.11738e+07	1.50976e+07	1.65869e+07	1.53553e+07	1.74083e+07	1.4463e+07	1.76441e+07	1.97658e+07	2.67292e+07	2.07536e+07	2.5651e+07	2.17906e+07	2.39973e+07	1.30584e+07	1.42173e+07	1.27743e+07	1.49931e+07	1.3477e+07
Q14BB9	2	2	122.4	1.99259e-09	1.44983	Condition 1	Condition 3	MAP6 domain-containing protein 1 OS=Mus musculus GN=Map6d1 PE=1 SV=1	907746	883183	835808	869025	844060	879716	653186	690031	697639	741024	698269	713115	589343	650949	577456	627399	538990	615972	558324	628234	609902	677188	606211	692922	721462	789441	645634	826168	661180	834304	487010	690031	580214	742764	599194	720068	315366	378122	325662	432140	304588
P61358	1	1	42.48	2.04034e-09	3.34562	Condition 1	Condition 2	60S ribosomal protein L27 OS=Mus musculus GN=Rpl27 PE=1 SV=2	479526	393750	372712	369078	294663	362256	107159	116580	97428.2	109628	151411	96885.5	178775	130182	185529	140358	210167	114756	160017	126957	198048	163684	178689	152675	381120	351957	287908	350876	230819	343556	79897	116580	81029.3	109885	129928	97830.1	95665.2	75619.6	104631	96675.9	118767
Q8VHQ4	1	1	13.36	2.05267e-09	1.83859	Condition 2	Condition 3	Ras-related protein Rab-40C OS=Mus musculus GN=Rab40c PE=1 SV=1	181408	244509	224670	208793	209696	209273	295241	255215	239180	285082	222354	249892	134668	140457	151348	154551	132956	127404	169367	150808	180897	152798	184021	176485	144180	218557	173550	198496	164262	198470	220129	255215	198922	285752	190805	252328	72062.9	81588.5	85354.3	106452	75134.7
Q9QYB8	31	30	2753.86	2.08599e-09	1.30969	Condition 1	Condition 3	Beta-adducin OS=Mus musculus GN=Add2 PE=1 SV=4	1.00207e+07	9.53075e+06	9.9358e+06	1.01316e+07	9.6845e+06	9.5726e+06	7.59018e+06	7.3777e+06	7.80107e+06	7.96775e+06	8.20809e+06	8.67887e+06	7.56315e+06	6.93961e+06	7.44454e+06	7.59133e+06	7.87615e+06	7.53933e+06	8.06811e+06	7.71633e+06	8.14889e+06	7.86678e+06	7.49896e+06	7.40804e+06	7.9643e+06	8.51914e+06	7.67507e+06	9.63193e+06	7.58618e+06	9.07845e+06	5.65917e+06	7.3777e+06	6.48801e+06	7.98645e+06	7.04348e+06	8.76348e+06	4.04715e+06	4.03107e+06	4.19842e+06	5.22876e+06	4.45088e+06
Q9QVP9	9	9	533.84	2.10648e-09	1.39599	Condition 1	Condition 2	Protein-tyrosine ki0se 2-beta OS=Mus musculus GN=Ptk2b PE=1 SV=2	656340	712700	768359	690083	699317	687503	524246	477187	543239	498518	465147	510525	580881	499313	559659	536108	551621	535451	590998	622539	617876	625997	680722	627843	521649	637053	593531	656050	547798	652013	390873	477187	451803	499688	399149	515502	310838	290040	315625	369261	311726
Q9Z2W0	4	4	189.2	2.11728e-09	1.472	Condition 4	Condition 2	Aspartyl aminopeptidase OS=Mus musculus GN=Dnpep PE=1 SV=2	208794	230754	217120	213500	213835	230051	231848	209565	204365	208295	223391	208656	224696	274208	221712	241237	246775	234784	327044	343425	288668	305773	293283	334970	165946	206261	167718	202971	167504	218175	172864	209565	169967	208784	191695	210690	120238	159281	125037	166160	139455
P21981	7	7	410.74	2.13852e-09	1.44832	Condition 3	Condition 2	Protein-glutamine gamma-glutamyltransferase 2 OS=Mus musculus GN=Tgm2 PE=1 SV=4	404561	446044	394152	412653	424624	385259	437457	423329	398901	394482	384891	408046	572257	689959	570362	566571	595117	549916	497504	494359	462488	449855	437752	451232	321539	398700	304470	392302	332622	365371	326164	423329	331759	395407	330280	412025	306223	400782	321662	390244	336306
Q8BFY9	2	2	76.8	2.14602e-09	1.36376	Condition 1	Condition 2	Transportin-1 OS=Mus musculus GN=Tnpo1 PE=1 SV=2	346950	362185	366124	379803	325965	327656	253384	257660	247166	260536	252644	274832	241146	293598	269673	263442	269211	261396	273928	283984	281354	269880	280977	281251	275750	323743	282819	361073	255339	310742	188921	257660	205564	261147	216797	277512	129041	170544	152085	181454	152134
Q8BH44	18	18	1264.91	2.1681e-09	1.27528	Condition 4	Condition 1	Coronin-2B OS=Mus musculus GN=Coro2b PE=1 SV=2	2.11646e+06	2.25646e+06	2.29191e+06	2.30102e+06	2.23185e+06	2.10451e+06	2.54009e+06	2.48228e+06	2.48659e+06	2.56663e+06	2.39149e+06	2.46135e+06	2.40034e+06	2.5833e+06	2.39813e+06	2.37459e+06	2.55692e+06	2.53342e+06	2.80383e+06	2.7172e+06	2.80123e+06	2.91208e+06	2.98484e+06	2.74487e+06	1.68213e+06	2.01696e+06	1.77042e+06	2.18754e+06	1.74828e+06	1.99587e+06	1.89387e+06	2.48228e+06	2.06805e+06	2.57265e+06	2.05217e+06	2.48535e+06	1.28446e+06	1.50058e+06	1.35245e+06	1.63557e+06	1.44494e+06
Q9CQQ7	6	6	402.08	2.20631e-09	2.88697	Condition 4	Condition 1	ATP synthase F(0) complex subunit B1, mitochondrial OS=Mus musculus GN=Atp5f1 PE=1 SV=1	785299	767395	551910	510946	992914	868698	2.21148e+06	1.78943e+06	1.96103e+06	1.89467e+06	1.82874e+06	1.88053e+06	1.15223e+06	1.23463e+06	1.76356e+06	1.64497e+06	1.10231e+06	1.15421e+06	1.97064e+06	2.29411e+06	2.11232e+06	2.29002e+06	2.0687e+06	2.18962e+06	624144	685943	426332	485748	777782	823855	1.64886e+06	1.78943e+06	1.63095e+06	1.89912e+06	1.56926e+06	1.89886e+06	616575	717170	994577	1.13303e+06	622926
P57759	6	5	371.15	2.22393e-09	1.52143	Condition 2	Condition 4	Endoplasmic reticulum resident protein 29 OS=Mus musculus GN=Erp29 PE=1 SV=2	2.3058e+06	2.41047e+06	2.47917e+06	2.52017e+06	2.36358e+06	2.40852e+06	3.27685e+06	3.43747e+06	3.16937e+06	3.34893e+06	3.18276e+06	3.367e+06	2.78523e+06	3.77552e+06	2.72842e+06	3.39626e+06	2.8777e+06	2.91696e+06	2.20776e+06	2.19846e+06	2.20655e+06	2.11168e+06	2.13016e+06	2.14786e+06	1.83262e+06	2.15462e+06	1.91507e+06	2.39588e+06	1.85147e+06	2.28419e+06	2.44319e+06	3.43747e+06	2.63591e+06	3.35679e+06	2.73117e+06	3.39983e+06	1.49042e+06	2.19311e+06	1.53872e+06	2.33928e+06	1.62621e+06
Q8BFR5	26	25	2508.05	2.23205e-09	1.26406	Condition 4	Condition 1	Elongation factor Tu, mitochondrial OS=Mus musculus GN=Tufm PE=1 SV=1	8.61232e+06	8.3451e+06	8.11557e+06	8.27129e+06	7.95687e+06	7.76728e+06	8.69723e+06	8.3077e+06	8.46023e+06	8.47817e+06	8.16187e+06	7.89836e+06	9.74142e+06	8.97961e+06	9.43134e+06	8.58913e+06	9.34618e+06	9.25668e+06	1.08341e+07	1.03823e+07	1.03296e+07	1.02301e+07	1.055e+07	9.69947e+06	6.84493e+06	7.45934e+06	6.26901e+06	7.86338e+06	6.23287e+06	7.36633e+06	6.48458e+06	8.3077e+06	7.03622e+06	8.49807e+06	7.00381e+06	7.97537e+06	5.21278e+06	5.21606e+06	5.3189e+06	5.91603e+06	5.28161e+06
O09106	5	5	368.58	2.29175e-09	1.42298	Condition 3	Condition 1	Histone deacetylase 1 OS=Mus musculus GN=Hdac1 PE=1 SV=1	923033	993239	898481	923651	898604	910431	1.20398e+06	1.10013e+06	1.17658e+06	1.14351e+06	1.19136e+06	1.15856e+06	1.357e+06	1.43669e+06	1.21263e+06	1.27216e+06	1.34149e+06	1.2739e+06	1.19218e+06	1.23395e+06	1.05876e+06	1.28778e+06	1.17009e+06	1.26759e+06	733612	887816	694046	878100	703905	863434	897674	1.10013e+06	978543	1.14619e+06	1.02232e+06	1.16986e+06	726153	834543	683874	876238	758090
Q62059	8	8	538.5	2.33223e-09	1.49874	Condition 3	Condition 1	Versican core protein OS=Mus musculus GN=Vcan PE=1 SV=2	1.75962e+06	1.88912e+06	1.89738e+06	1.71344e+06	1.80512e+06	1.70387e+06	2.10668e+06	2.22253e+06	2.24715e+06	2.64087e+06	2.25869e+06	2.52062e+06	2.7969e+06	2.99004e+06	2.65569e+06	2.51835e+06	2.44836e+06	2.72993e+06	2.65482e+06	2.72015e+06	2.518e+06	2.42347e+06	2.67338e+06	2.62919e+06	1.39852e+06	1.68861e+06	1.46567e+06	1.62894e+06	1.41401e+06	1.61591e+06	1.57072e+06	2.22253e+06	1.86892e+06	2.64707e+06	1.93821e+06	2.54519e+06	1.49666e+06	1.73685e+06	1.4977e+06	1.73459e+06	1.38359e+06
Q5XG69	5	5	276.35	2.33247e-09	1.4725	Condition 3	Condition 2	Soluble lamin-associated protein of 75 kDa OS=Mus musculus GN=Fam169a PE=1 SV=3	614469	652749	599469	681232	553568	578536	420399	412240	421229	459813	389754	489830	627035	636538	629263	660578	646264	618897	590620	649502	581198	555467	606288	587110	488370	583465	463069	647636	433628	548671	313445	412240	350328	460893	334453	494606	335536	369751	354879	454993	365210
Q9JK48	6	6	471.24	2.41862e-09	1.27873	Condition 4	Condition 3	Endophilin-B1 OS=Mus musculus GN=Sh3glb1 PE=1 SV=1	696896	702639	711349	727817	702457	677046	622439	650288	619209	660682	707741	679870	561914	542779	585805	610568	563545	588458	728799	755125	714640	766431	719953	730604	553882	628060	549494	691923	550257	642096	464085	650288	514985	662233	607322	686498	300688	315288	330371	420548	318464
Q9EQ20	24	22	1809.98	2.45085e-09	1.44101	Condition 3	Condition 1	Methylmalo0te-semialdehyde dehydroge0se [acylating], mitochondrial OS=Mus musculus GN=Aldh6a1 PE=1 SV=1	5.55296e+06	6.00399e+06	5.67324e+06	6.09329e+06	5.69864e+06	5.5153e+06	6.21039e+06	6.97896e+06	6.17867e+06	6.46132e+06	6.44388e+06	6.85627e+06	8.21072e+06	9.42619e+06	7.61538e+06	8.37813e+06	8.04399e+06	8.09451e+06	7.43471e+06	8.81884e+06	7.41835e+06	7.48663e+06	8.037e+06	7.66937e+06	4.4134e+06	5.36672e+06	4.38239e+06	5.79279e+06	4.46393e+06	5.2306e+06	4.63041e+06	6.97896e+06	5.13869e+06	6.47649e+06	5.52958e+06	6.92312e+06	4.39367e+06	5.47547e+06	4.29478e+06	5.77069e+06	4.54573e+06
Q8R3N6	2	2	125.47	2.68945e-09	1.64337	Condition 4	Condition 1	THO complex subunit 1 OS=Mus musculus GN=Thoc1 PE=1 SV=1	276498	247453	274615	281680	254172	216863	380914	358005	335891	412793	338751	390092	387266	420007	376179	392821	397706	371000	420817	397405	445973	381484	471249	432396	219757	221189	212131	267789	199101	205668	284006	358005	279355	413762	290687	393896	207232	243973	212150	270568	224747
Q69Z98	10	8	546.86	2.71871e-09	1.38007	Condition 1	Condition 4	Serine/threonine-protein ki0se BRSK2 OS=Mus musculus GN=Brsk2 PE=1 SV=2	907936	1.00306e+06	925696	920238	963934	849132	860102	946479	810125	910899	904410	927044	784628	828205	769268	740871	788262	826181	664100	678639	697389	697189	685263	613453	721614	896593	715069	874855	755081	805299	641284	946479	673766	913037	776086	936083	419866	481086	433837	510298	445454
Q3TXX4	3	3	165.36	2.72127e-09	1.65902	Condition 1	Condition 2	Vesicular glutamate transporter 1 OS=Mus musculus GN=Slc17a7 PE=1 SV=2	276653	327448	306027	285941	280402	282990	188807	183794	201135	142318	185250	159241	237831	246669	236133	212346	227255	209297	295985	294673	278565	312949	276723	263501	219879	292692	236396	271839	219648	268382	140773	183794	167280	142652	158966	160793	127267	143284	133170	146260	128424
P17225	7	6	617.1	2.7438e-09	2.29017	Condition 4	Condition 1	Polypyrimidine tract-binding protein 1 OS=Mus musculus GN=Ptbp1 PE=1 SV=2	914643	793303	902904	842521	899077	857201	1.58066e+06	1.3932e+06	1.48394e+06	1.29703e+06	1.48643e+06	1.33466e+06	2.14679e+06	1.24294e+06	2.12038e+06	1.82981e+06	2.42008e+06	1.806e+06	1.93082e+06	1.93699e+06	2.36224e+06	1.99931e+06	1.96943e+06	1.7322e+06	726944	709101	697463	800971	704276	812951	1.17853e+06	1.3932e+06	1.23417e+06	1.30008e+06	1.27553e+06	1.34768e+06	1.14878e+06	721998	1.19581e+06	1.26034e+06	1.36761e+06
Q61831	5	5	192.12	2.76674e-09	1.72878	Condition 1	Condition 3	Mitogen-activated protein ki0se 10 OS=Mus musculus GN=Mapk10 PE=1 SV=2	679874	760997	729230	791091	860261	777236	504973	451482	442096	517328	558645	541131	454740	441972	441109	474665	463509	384077	431337	416203	520214	507445	491747	413454	540353	680224	563306	752077	673870	737114	376504	451482	367683	518542	479381	546407	243338	256732	248768	326940	261933
Q99LB6	3	3	158.68	2.82516e-09	1.50528	Condition 1	Condition 3	Methionine adenosyltransferase 2 subunit beta OS=Mus musculus GN=Mat2b PE=1 SV=1	421080	453788	399975	441440	395684	402627	257798	283134	295778	264904	281952	288843	251557	323854	254227	293254	257547	290083	271436	277281	288675	280585	276075	323041	334668	405622	308968	419670	309952	381843	192212	283134	245993	265526	241947	291659	134612	188120	143374	201988	145542
O35633	7	6	519.28	2.83488e-09	1.36425	Condition 4	Condition 2	Vesicular inhibitory amino acid transporter OS=Mus musculus GN=Slc32a1 PE=1 SV=3	1.27069e+06	1.36876e+06	1.39011e+06	1.41386e+06	1.30874e+06	1.37296e+06	1.29731e+06	1.21067e+06	1.21322e+06	1.24639e+06	1.19131e+06	1.17214e+06	1.48902e+06	1.60214e+06	1.33442e+06	1.39997e+06	1.39907e+06	1.38218e+06	1.65226e+06	1.6692e+06	1.58944e+06	1.61792e+06	1.72907e+06	1.74349e+06	1.00993e+06	1.22348e+06	1.07381e+06	1.34414e+06	1.02518e+06	1.30209e+06	967265	1.21067e+06	1.00901e+06	1.24932e+06	1.02228e+06	1.18357e+06	796795	930650	752562	964275	790630
Q8R1S4	1	1	35.08	2.86055e-09	2.2581	Condition 2	Condition 4	Metastasis suppressor protein 1 OS=Mus musculus GN=Mtss1 PE=1 SV=1	53262.8	52323.3	39925.9	49111.1	50699.4	50052.9	73751.4	85211.3	84972.2	110236	102884	99394.4	82889.9	77134.4	69815.1	53787.9	69672.7	71190.5	45465.6	37772.5	43029.1	37636.5	36116.8	46403	42332.4	46769.7	30841.4	46689.1	39714.5	47469.1	54988.4	85211.3	70669.9	110494	88286.1	100363	44355.6	44805.7	39372.9	37048	39372.7
Q61550	8	8	431.36	2.87411e-09	1.82372	Condition 4	Condition 1	Double-strand-break repair protein rad21 homolog OS=Mus musculus GN=Rad21 PE=1 SV=3	392544	350769	360741	377377	313783	329986	645239	597241	677521	616190	610973	628023	676564	489967	637835	599106	771172	594311	607614	661344	736127	712509	586942	571232	311988	313538	278660	358766	245796	312952	481084	597241	563482	617636	524284	634147	362040	284611	359714	412653	435796
Q8VHC3	3	3	246.71	2.96748e-09	1.54215	Condition 2	Condition 1	Selenoprotein M OS=Mus musculus GN=Selm PE=1 SV=3	351593	343958	371136	398400	371051	315737	576631	576842	528441	587118	498170	551321	518309	595858	510983	563416	496626	519710	343015	446007	404239	391236	427910	392348	279440	307450	286690	378752	290656	299438	429931	576842	439495	588496	427486	556696	277355	346121	288174	388070	280648
Q8K298	12	12	560.92	2.97841e-09	1.50346	Condition 2	Condition 4	Anillin OS=Mus musculus GN=Anln PE=1 SV=2	395973	399598	339337	404809	383605	388411	508861	494258	504916	535358	481821	528171	440606	507781	437363	429146	414434	469937	382298	346501	320954	312752	326093	342306	314713	357184	262126	384845	300490	368361	379402	494258	419930	536614	413457	533321	235775	294959	246655	295587	234201
Q80TK0	23	23	1422.97	3.07686e-09	1.41253	Condition 1	Condition 4	Uncharacterized protein KIAA1107 OS=Mus musculus GN=Kiaa1107 PE=1 SV=5	2.12774e+06	1.98064e+06	1.94126e+06	1.96709e+06	1.84845e+06	1.6483e+06	1.55533e+06	1.71587e+06	1.55008e+06	1.67055e+06	1.65335e+06	1.55599e+06	1.33796e+06	1.53635e+06	1.37207e+06	1.3688e+06	1.46451e+06	1.39581e+06	1.38547e+06	1.38419e+06	1.36315e+06	1.33565e+06	1.34855e+06	1.33397e+06	1.69109e+06	1.77042e+06	1.49956e+06	1.87008e+06	1.44795e+06	1.56321e+06	1.15964e+06	1.71587e+06	1.28917e+06	1.67447e+06	1.41876e+06	1.57116e+06	715962	892435	773792	942802	827610
Q920I9	29	29	2028.18	3.1714e-09	1.32065	Condition 1	Condition 3	WD repeat-containing protein 7 OS=Mus musculus GN=Wdr7 PE=1 SV=3	3.34605e+06	3.24315e+06	3.26808e+06	3.36798e+06	3.21732e+06	3.39195e+06	2.76345e+06	2.78512e+06	2.60563e+06	3.11029e+06	2.67629e+06	2.78277e+06	2.46732e+06	2.70943e+06	2.41214e+06	2.44689e+06	2.42164e+06	2.56129e+06	2.79022e+06	2.89727e+06	2.80316e+06	2.72435e+06	2.90807e+06	2.77763e+06	2.65939e+06	2.89892e+06	2.52448e+06	3.20188e+06	2.52023e+06	3.21685e+06	2.06041e+06	2.78512e+06	2.16706e+06	3.11759e+06	2.29656e+06	2.8099e+06	1.3203e+06	1.57385e+06	1.36035e+06	1.68537e+06	1.36849e+06
Q8BL97	5	5	327.65	3.1794e-09	1.56164	Condition 3	Condition 4	Serine/arginine-rich splicing factor 7 OS=Mus musculus GN=Srsf7 PE=1 SV=1	2.63093e+06	2.75093e+06	2.34074e+06	2.49578e+06	2.37576e+06	2.30678e+06	2.24806e+06	2.3295e+06	2.15813e+06	2.07997e+06	2.5002e+06	2.1608e+06	2.52309e+06	2.77712e+06	2.44153e+06	2.20771e+06	2.69193e+06	2.40152e+06	1.66357e+06	1.4863e+06	1.82905e+06	1.60345e+06	1.57208e+06	1.47831e+06	2.09102e+06	2.45894e+06	1.80814e+06	2.3727e+06	1.86101e+06	2.1877e+06	1.67613e+06	2.3295e+06	1.79488e+06	2.08485e+06	2.14546e+06	2.18187e+06	1.35014e+06	1.61317e+06	1.37693e+06	1.52063e+06	1.52123e+06
Q80XN0	7	7	490.17	3.21021e-09	1.68809	Condition 4	Condition 1	D-beta-hydroxybutyrate dehydroge0se, mitochondrial OS=Mus musculus GN=Bdh1 PE=1 SV=2	484502	443573	561535	538070	471112	491338	632188	535384	577676	599151	582994	591585	701161	600105	576099	599835	636376	562617	889289	747118	952211	813501	860817	784662	385075	396492	433767	511534	369037	465974	471354	535384	480442	600558	500275	597352	375201	348588	324897	413154	359622
Q9R118	1	1	53.03	3.24877e-09	2.10689	Condition 4	Condition 1	Serine protease HTRA1 OS=Mus musculus GN=Htra1 PE=1 SV=2	87524.8	82948.8	104105	93277.4	65792.3	86624.8	131088	148423	127628	152897	120692	140059	125864	156217	122868	138873	153657	132072	198782	185714	157737	176171	200634	177123	69563.3	74144.5	80417.8	88677.3	51537.3	82153.1	97737.9	148423	106146	153255	103568	141424	67351.9	90743	69292.5	95653.2	86833.1
P58281	35	34	2621.28	3.25895e-09	1.409	Condition 4	Condition 1	Dy0min-like 120 kDa protein, mitochondrial OS=Mus musculus GN=Opa1 PE=1 SV=1	1.48207e+06	1.49006e+06	1.53011e+06	1.46554e+06	1.54913e+06	1.37125e+06	1.53695e+06	1.62672e+06	1.60564e+06	1.50681e+06	1.67035e+06	1.65623e+06	1.89695e+06	2.10977e+06	1.77244e+06	1.73678e+06	1.79019e+06	1.72706e+06	2.26116e+06	2.0985e+06	2.04475e+06	1.9433e+06	2.10824e+06	2.06743e+06	1.17793e+06	1.33191e+06	1.18196e+06	1.39327e+06	1.21349e+06	1.30046e+06	1.14594e+06	1.62672e+06	1.33539e+06	1.51034e+06	1.43335e+06	1.67238e+06	1.01508e+06	1.22552e+06	999587	1.19626e+06	1.01165e+06
O54984	7	7	474.92	3.34723e-09	1.35884	Condition 4	Condition 2	ATPase As01 OS=Mus musculus GN=As01 PE=1 SV=2	1.48723e+06	1.5646e+06	1.53717e+06	1.50429e+06	1.5126e+06	1.41193e+06	1.48422e+06	1.32741e+06	1.3712e+06	1.4605e+06	1.32874e+06	1.44989e+06	1.50869e+06	1.76305e+06	1.52051e+06	1.44255e+06	1.5273e+06	1.51762e+06	1.91218e+06	1.87336e+06	1.91205e+06	1.92672e+06	1.98247e+06	1.83726e+06	1.18203e+06	1.39853e+06	1.18741e+06	1.4301e+06	1.18487e+06	1.33904e+06	1.10662e+06	1.32741e+06	1.1404e+06	1.46393e+06	1.14021e+06	1.46403e+06	807324	1.02412e+06	857505	993603	863092
Q9CPP6	2	2	83.26	3.49392e-09	1.96596	Condition 4	Condition 1	0DH dehydroge0se [ubiquinone] 1 alpha subcomplex subunit 5 OS=Mus musculus GN=Ndufa5 PE=1 SV=3	105595	127365	113950	118705	113153	98626.3	148640	149116	131472	149952	162674	156043	179675	209761	176862	177041	163364	175752	256559	257235	171998	211373	213251	221316	83925.5	113846	88022.7	112851	88636.7	93535.1	110825	149116	109343	150304	139593	157565	96146.7	121846	99743.1	121942	92318.5
Q91WC3	16	16	783.53	3.56005e-09	1.26445	Condition 4	Condition 1	Long-chain-fatty-acid--CoA ligase 6 OS=Mus musculus GN=Acsl6 PE=1 SV=1	881608	818353	838990	871591	828212	791590	937661	924330	934034	910309	870485	906602	1.03992e+06	1.0702e+06	982880	987245	1.00198e+06	940315	1.08218e+06	1.05358e+06	1.03586e+06	1.04648e+06	1.12153e+06	1.02098e+06	700688	731492	648092	828607	648765	750727	699111	924330	776820	912446	746975	915441	556478	621657	554306	679995	566229
Q9CRB6	8	8	709.76	3.66292e-09	1.39377	Condition 3	Condition 1	Tubulin polymerization-promoting protein family member 3 OS=Mus musculus GN=Tppp3 PE=1 SV=1	3.1121e+06	3.4282e+06	3.44723e+06	3.53066e+06	3.18108e+06	3.76006e+06	3.5479e+06	3.89701e+06	3.67675e+06	3.63237e+06	3.7525e+06	3.84576e+06	5.14669e+06	4.96351e+06	4.40171e+06	4.64067e+06	4.66796e+06	4.69496e+06	3.64012e+06	3.53318e+06	3.67112e+06	3.88069e+06	3.76084e+06	3.90752e+06	2.47345e+06	3.06433e+06	2.66287e+06	3.35654e+06	2.49184e+06	3.56596e+06	2.64528e+06	3.89701e+06	3.05789e+06	3.6409e+06	3.22007e+06	3.88325e+06	2.75407e+06	2.88319e+06	2.48239e+06	3.19641e+06	2.63791e+06
Q9CQA1	3	3	131.74	3.77292e-09	1.67595	Condition 1	Condition 3	Trafficking protein particle complex subunit 5 OS=Mus musculus GN=Trappc5 PE=1 SV=1	327681	340301	358547	347442	325037	362150	244750	222496	226984	271816	255977	238742	179787	219921	202167	216510	198835	212624	228755	204729	184168	223499	191530	258063	260436	304181	276965	330307	254612	343455	182483	222496	188779	272454	219658	241070	96206.4	127747	114014	149128	112364
Q9R1Q8	12	12	1146.46	3.78225e-09	1.20962	Condition 1	Condition 4	Transgelin-3 OS=Mus musculus GN=Tagln3 PE=1 SV=1	2.57761e+07	2.59347e+07	2.61102e+07	2.60183e+07	2.38105e+07	2.55878e+07	2.2669e+07	2.21123e+07	2.12716e+07	2.27712e+07	2.19524e+07	2.21404e+07	2.34431e+07	2.30267e+07	2.13605e+07	2.15728e+07	2.20069e+07	2.17333e+07	2.07678e+07	2.09157e+07	2.16102e+07	2.12661e+07	2.1366e+07	2.07568e+07	2.04864e+07	2.31819e+07	2.01692e+07	2.47352e+07	1.86515e+07	2.42669e+07	1.69018e+07	2.21123e+07	1.76912e+07	2.28246e+07	1.88377e+07	2.23562e+07	1.25447e+07	1.33757e+07	1.20465e+07	1.48589e+07	1.24363e+07
Q9CPU2	1	1	27.13	3.82494e-09	5.28091	Condition 4	Condition 1	0DH dehydroge0se [ubiquinone] 1 beta subcomplex subunit 2, mitochondrial OS=Mus musculus GN=Ndufb2 PE=1 SV=1	51673.9	50905.6	41874.3	85743.3	30778	64152.1	95261.9	180423	92669.7	108063	115314	67584.6	214525	224524	157442	187166	258895	172400	294615	275298	368984	297072	209464	271534	41069.6	45502.5	32346.5	81514.8	24109.4	60840.5	71026.4	180423	77071.8	108317	98952.3	68243.6	114796	130421	88791.3	128916	146304
Q3UNH4	7	7	345.38	3.89787e-09	1.40334	Condition 4	Condition 2	G protein-regulated inducer of neurite outgrowth 1 OS=Mus musculus GN=Gprin1 PE=1 SV=2	499520	515264	498970	515968	481680	502090	465544	458212	444871	438293	491310	444863	604767	574545	515079	533337	631023	528388	653482	621131	651468	681993	596006	645406	397011	460573	385437	490523	377316	476172	347105	458212	369991	439321	421600	449201	323620	333741	290484	367352	356597
Q810U4	16	15	1481.96	3.91936e-09	1.31739	Condition 1	Condition 2	Neuro0l cell adhesion molecule OS=Mus musculus GN=Nrcam PE=1 SV=2	2.81387e+06	2.68621e+06	2.7994e+06	2.70216e+06	2.83164e+06	2.59197e+06	2.26644e+06	1.91773e+06	2.13825e+06	2.01849e+06	2.02033e+06	2.10677e+06	2.1363e+06	2.28896e+06	2.04935e+06	1.95396e+06	2.0799e+06	2.02968e+06	2.20539e+06	2.15627e+06	2.13681e+06	2.13505e+06	2.31092e+06	2.03945e+06	2.23642e+06	2.4011e+06	2.16244e+06	2.5689e+06	2.21812e+06	2.45817e+06	1.68984e+06	1.91773e+06	1.77834e+06	2.02322e+06	1.73367e+06	2.12731e+06	1.14317e+06	1.32961e+06	1.15575e+06	1.34585e+06	1.17537e+06
Q6PD03	3	3	122.21	3.99202e-09	1.35332	Condition 1	Condition 3	Serine/threonine-protein phosphatase 2A 56 kDa regulatory subunit alpha isoform OS=Mus musculus GN=Ppp2r5a PE=1 SV=1	243026	261609	250811	237825	242201	238306	206407	217445	188801	211652	189712	200034	181587	198671	178123	174419	176426	179786	214141	205724	225453	214009	201881	211708	193153	233842	193743	226096	189724	226004	153895	217445	157022	212149	162794	201984	97169.9	115404	100454	120136	99700.1
Q8JZS0	4	4	326.18	4.00206e-09	1.35561	Condition 2	Condition 1	Protein lin-7 homolog A OS=Mus musculus GN=Lin7a PE=1 SV=2	795243	841760	857792	920119	818678	849287	1.22103e+06	1.16059e+06	1.10648e+06	1.12628e+06	1.1344e+06	1.14165e+06	944535	995608	947992	996881	877084	1.06182e+06	1.05013e+06	1.04162e+06	1.08316e+06	1.00884e+06	1.00318e+06	1.0611e+06	632046	752415	662616	874742	641297	805446	910388	1.16059e+06	920239	1.12892e+06	973440	1.15278e+06	505435	578327	534630	686632	495648
P26883	5	5	343.39	4.18469e-09	1.45932	Condition 1	Condition 2	Peptidyl-prolyl cis-trans isomerase FKBP1A OS=Mus musculus GN=Fkbp1a PE=1 SV=2	1.67006e+06	1.87814e+06	1.61815e+06	1.68866e+06	1.62134e+06	1.73149e+06	1.11519e+06	1.16139e+06	1.05219e+06	1.24529e+06	1.23833e+06	1.18256e+06	1.54589e+06	1.44499e+06	1.55582e+06	1.54222e+06	1.44455e+06	1.34247e+06	1.64605e+06	1.67675e+06	1.84963e+06	1.58714e+06	1.48947e+06	1.68991e+06	1.32734e+06	1.6788e+06	1.24997e+06	1.60538e+06	1.27005e+06	1.64211e+06	831475	1.16139e+06	875086	1.24821e+06	1.06263e+06	1.19409e+06	827229	839364	877419	1.06225e+06	816327
Q64511	31	30	2014.07	4.36479e-09	1.24397	Condition 3	Condition 1	D0 topoisomerase 2-beta OS=Mus musculus GN=Top2b PE=1 SV=2	1.20136e+06	1.27998e+06	1.25322e+06	1.24917e+06	1.24891e+06	1.24229e+06	1.59492e+06	1.57332e+06	1.47616e+06	1.51176e+06	1.45694e+06	1.53448e+06	1.52354e+06	1.694e+06	1.43962e+06	1.57347e+06	1.52611e+06	1.54185e+06	1.47627e+06	1.5478e+06	1.55906e+06	1.47602e+06	1.57468e+06	1.45708e+06	954819	1.14412e+06	968068	1.18757e+06	978313	1.17816e+06	1.18916e+06	1.57332e+06	1.22769e+06	1.51531e+06	1.25022e+06	1.54944e+06	815271	984007	811886	1.08377e+06	862421
Q8BK30	1	1	48.31	4.36834e-09	1.98466	Condition 4	Condition 1	0DH dehydroge0se [ubiquinone] flavoprotein 3, mitochondrial OS=Mus musculus GN=Ndufv3 PE=1 SV=1	139642	152015	150719	140766	181604	145330	192871	234631	219065	212162	210828	227302	275780	278141	236457	245412	272682	238553	329663	278364	392473	266488	282493	256708	110985	135880	116426	133824	142256	137828	143803	234631	182192	212660	180914	229518	147574	161566	133352	169035	154095
P31650	2	2	123.14	4.37739e-09	1.86909	Condition 4	Condition 1	Sodium- and chloride-dependent GABA transporter 3 OS=Mus musculus GN=Slc6a11 PE=1 SV=2	190616	214643	165292	195091	152346	198129	249135	235099	264468	269335	262496	253212	284628	267553	273027	275336	291199	286673	347339	314787	423006	368378	292950	339663	151498	191860	127682	185469	119338	187902	185753	235099	219953	269967	225252	255681	152308	155416	153977	189646	164559
P59999	9	9	632.09	4.65219e-09	1.38062	Condition 1	Condition 3	Actin-related protein 2/3 complex subunit 4 OS=Mus musculus GN=Arpc4 PE=1 SV=3	4.56228e+06	5.03939e+06	5.07832e+06	4.87751e+06	4.63804e+06	4.69091e+06	3.96862e+06	3.63524e+06	3.70483e+06	4.13842e+06	3.8064e+06	4.13425e+06	3.42612e+06	3.83444e+06	3.24063e+06	3.27851e+06	3.55924e+06	3.58393e+06	3.65413e+06	3.80052e+06	3.80668e+06	3.75485e+06	4.0331e+06	3.77748e+06	3.62603e+06	4.50451e+06	3.92283e+06	4.63697e+06	3.63313e+06	4.44876e+06	2.95897e+06	3.63524e+06	3.08124e+06	4.14813e+06	3.26633e+06	4.17456e+06	1.83337e+06	2.22734e+06	1.82759e+06	2.25818e+06	2.01136e+06
Q80U40	4	3	185.8	4.67651e-09	1.41687	Condition 4	Condition 2	RIMS-binding protein 2 OS=Mus musculus GN=Rimbp2 PE=1 SV=3	318506	316006	338638	312836	327810	309218	251480	216695	262215	228841	228426	231220	261139	227770	271028	271608	262908	248575	340997	320387	334137	316524	379778	318547	253144	282465	261587	297408	256785	293255	187501	216695	218080	229378	196015	233474	139739	132306	152849	187079	148572
Q9CY50	1	1	45.11	4.98172e-09	1.94231	Condition 3	Condition 1	Translocon-associated protein subunit alpha OS=Mus musculus GN=Ssr1 PE=1 SV=1	88804.2	115840	103641	120191	73721.5	102909	138596	140826	129342	140357	133973	129435	176439	225237	208250	205611	165351	194417	165611	185425	207533	203226	183807	204872	70580.2	103545	80058.9	114264	57748.5	97597.1	103336	140826	107572	140686	114964	130697	94414.9	130835	117445	141621	93441.5
P45878	8	7	407.8	5.16049e-09	1.32552	Condition 2	Condition 4	Peptidyl-prolyl cis-trans isomerase FKBP2 OS=Mus musculus GN=Fkbp2 PE=1 SV=1	2.78883e+06	2.95258e+06	2.81437e+06	2.70927e+06	2.81849e+06	2.6526e+06	2.95588e+06	2.98695e+06	3.09405e+06	3.39122e+06	3.06732e+06	3.11984e+06	2.69055e+06	2.90711e+06	2.8251e+06	3.00895e+06	2.63401e+06	2.82213e+06	2.29168e+06	2.35208e+06	2.28402e+06	2.37026e+06	2.4921e+06	2.25366e+06	2.21652e+06	2.63919e+06	2.17401e+06	2.57566e+06	2.20782e+06	2.51567e+06	2.20387e+06	2.98695e+06	2.57327e+06	3.39918e+06	2.63211e+06	3.15026e+06	1.43975e+06	1.68867e+06	1.59325e+06	2.0725e+06	1.4885e+06
D3Z7P3	31	31	3013.41	5.18452e-09	1.37021	Condition 2	Condition 3	Glutami0se kidney isoform, mitochondrial OS=Mus musculus GN=Gls PE=1 SV=1	6.17052e+06	6.02286e+06	6.32159e+06	6.79966e+06	6.53233e+06	6.89572e+06	6.28771e+06	7.22472e+06	6.64484e+06	6.90902e+06	6.33641e+06	7.0481e+06	4.995e+06	4.33967e+06	5.19968e+06	5.01365e+06	4.74666e+06	5.22697e+06	6.3976e+06	6.53519e+06	6.62437e+06	6.42386e+06	6.27548e+06	6.39363e+06	4.90423e+06	5.38359e+06	4.88321e+06	6.46432e+06	5.11699e+06	6.53976e+06	4.68806e+06	7.22472e+06	5.52639e+06	6.92524e+06	5.43736e+06	7.11682e+06	2.6729e+06	2.52082e+06	2.93241e+06	3.45331e+06	2.68238e+06
Q61187	3	3	191.88	5.32318e-09	1.51629	Condition 1	Condition 3	Tumor susceptibility gene 101 protein OS=Mus musculus GN=Tsg101 PE=1 SV=2	315141	367027	289901	317460	300752	343573	269624	294267	280776	319683	267287	309004	188636	213326	223272	217487	226176	206492	235166	255447	251847	247229	242748	244640	250469	328071	223939	301804	235589	325837	201029	294267	233516	320433	229363	312017	100942	123916	125917	149801	127814
Q4VA53	18	17	1122.83	5.37576e-09	1.51396	Condition 2	Condition 1	Sister chromatid cohesion protein PDS5 homolog B OS=Mus musculus GN=Pds5b PE=1 SV=1	686015	736258	721829	746420	733907	723204	989749	981959	1.05962e+06	1.03017e+06	1.12493e+06	1.39573e+06	1.04257e+06	1.15811e+06	1.07011e+06	1.08145e+06	1.09591e+06	1.08839e+06	1.03961e+06	986966	952987	997547	997990	958861	545234	658111	557589	709609	574894	685872	737948	981959	881269	1.03259e+06	965315	1.40934e+06	557897	672718	603502	744885	619308
P16125	23	23	1865.05	5.68068e-09	1.26978	Condition 1	Condition 2	L-lactate dehydroge0se B chain OS=Mus musculus GN=Ldhb PE=1 SV=2	1.12789e+07	1.11952e+07	1.12957e+07	1.07625e+07	1.04366e+07	1.10065e+07	8.5181e+06	8.53387e+06	8.41925e+06	8.54362e+06	9.11916e+06	8.82396e+06	9.59352e+06	8.89426e+06	8.67382e+06	9.11608e+06	9.41759e+06	8.28246e+06	9.1568e+06	8.72398e+06	9.50019e+06	9.6213e+06	9.15406e+06	8.90006e+06	8.9643e+06	1.00069e+07	8.72556e+06	1.02318e+07	8.17532e+06	1.04383e+07	6.35101e+06	8.53387e+06	7.00214e+06	8.56367e+06	7.82528e+06	8.91e+06	5.13363e+06	5.16648e+06	4.89169e+06	6.27898e+06	5.32197e+06
P12961	4	4	225.26	5.75825e-09	1.75707	Condition 4	Condition 1	Neuroendocrine protein 7B2 OS=Mus musculus GN=Scg5 PE=1 SV=1	335540	380569	336267	356618	357494	361054	386176	537578	401570	356623	299205	339809	552563	634749	573515	606900	569129	577947	577381	615774	647729	649856	615914	631587	266682	340175	259755	339031	280036	342416	287929	537578	333979	357460	256752	343122	295684	368712	323440	418021	321620
Q9WTX2	4	4	120.3	5.77369e-09	2.05013	Condition 2	Condition 1	Interferon-inducible double-stranded R0-dependent protein ki0se activator A OS=Mus musculus GN=Prkra PE=1 SV=1	143673	195827	164527	209962	158481	178590	400971	375140	302807	464257	292205	319427	345452	386721	320584	359216	328041	312883	312972	349674	330858	297085	333531	312233	114189	175042	127091	199608	124143	169371	298960	375140	251839	465347	250745	322541	184857	224638	180796	247421	185379
Q62277	2	2	140.11	5.77745e-09	1.50198	Condition 4	Condition 2	Sy0ptophysin OS=Mus musculus GN=Syp PE=1 SV=2	3.1256e+06	3.56496e+06	3.65354e+06	3.54103e+06	2.85852e+06	3.20293e+06	2.28396e+06	2.21958e+06	2.24057e+06	2.49872e+06	2.23077e+06	2.4242e+06	2.64806e+06	3.15034e+06	2.71254e+06	3.04762e+06	2.72315e+06	2.83065e+06	3.50182e+06	3.54561e+06	3.55255e+06	3.31294e+06	3.2834e+06	3.67786e+06	2.48418e+06	3.18657e+06	2.82223e+06	3.3664e+06	2.23917e+06	3.03759e+06	1.7029e+06	2.21958e+06	1.86345e+06	2.50458e+06	1.91425e+06	2.44784e+06	1.41701e+06	1.82996e+06	1.52976e+06	2.09914e+06	1.53888e+06
Q6PGG2	1	1	43.86	5.89952e-09	1.67135	Condition 3	Condition 2	GEM-interacting protein OS=Mus musculus GN=Gmip PE=1 SV=1	358767	363889	351212	341015	309223	342832	251244	221429	215752	183733	222298	192412	338698	374145	324700	339936	387017	386304	275773	299716	255984	303514	268624	330436	285143	325266	271299	324197	242224	325135	187325	221429	179437	184164	190757	194288	181242	217333	183118	234141	218707
O35381	8	8	691.15	5.97633e-09	1.29028	Condition 1	Condition 3	Acidic leucine-rich nuclear phosphoprotein 32 family member A OS=Mus musculus GN=Anp32a PE=1 SV=1	3.26292e+06	3.16778e+06	3.35768e+06	3.22825e+06	3.03552e+06	3.13574e+06	3.11106e+06	2.76595e+06	3.19948e+06	3.17056e+06	2.95123e+06	2.91873e+06	2.41675e+06	2.57386e+06	2.50606e+06	2.39068e+06	2.47853e+06	2.50524e+06	2.50987e+06	2.4734e+06	2.66043e+06	2.46923e+06	2.8135e+06	2.40239e+06	2.59331e+06	2.83155e+06	2.5937e+06	3.06904e+06	2.37782e+06	2.97387e+06	2.31958e+06	2.76595e+06	2.66095e+06	3.178e+06	2.53249e+06	2.94719e+06	1.29324e+06	1.4951e+06	1.41332e+06	1.64665e+06	1.40064e+06
Q9DB60	7	7	562.35	6.00145e-09	1.3532	Condition 4	Condition 1	Prostamide/prostaglandin F synthase OS=Mus musculus GN=Fam213b PE=1 SV=1	762738	726889	788925	759754	781407	667833	832624	821643	775647	836702	764797	879714	976886	873218	875978	876329	886045	872872	1.00777e+06	1.0267e+06	1.04215e+06	963818	1.0305e+06	1.00163e+06	606212	649737	609418	722286	612102	633358	620797	821643	645092	838666	656283	888291	522746	507233	494017	603599	500712
Q8C0M9	7	7	430.35	6.12242e-09	1.36457	Condition 1	Condition 4	Isoaspartyl peptidase/L-asparagi0se OS=Mus musculus GN=Asrgl1 PE=1 SV=1	1.32454e+06	1.33626e+06	1.29302e+06	1.2026e+06	1.32757e+06	1.20932e+06	1.03796e+06	914956	913555	948478	997148	982976	1.0721e+06	1.0279e+06	1.0075e+06	1.09979e+06	1.05483e+06	1.11354e+06	913654	909286	1.07697e+06	912232	918455	907304	1.05272e+06	1.19443e+06	998818	1.14329e+06	1.03993e+06	1.14689e+06	773890	914956	759788	950704	855666	992559	573699	597083	568191	757514	596095
O88343	6	6	529.11	6.20575e-09	1.49741	Condition 4	Condition 1	Electrogenic sodium bicarbo0te cotransporter 1 OS=Mus musculus GN=Slc4a4 PE=1 SV=2	632666	675286	638873	619762	521672	568171	744845	781838	745959	733564	790838	809570	929498	854409	763801	827952	849631	770975	913211	861644	915107	952094	936573	896529	502833	603610	493508	589197	408642	538841	555350	781838	620401	735285	678629	817463	497388	496307	430754	570277	480134
P83510	15	13	1059.93	6.20968e-09	1.36424	Condition 1	Condition 3	Traf2 and NCK-interacting protein ki0se OS=Mus musculus GN=Tnik PE=1 SV=2	1.62848e+06	1.65375e+06	1.71009e+06	1.68812e+06	1.72934e+06	1.73768e+06	1.36685e+06	1.39379e+06	1.38027e+06	1.40115e+06	1.43828e+06	1.54746e+06	1.29107e+06	1.39303e+06	1.20289e+06	1.21372e+06	1.18487e+06	1.1526e+06	1.36392e+06	1.41532e+06	1.28559e+06	1.35648e+06	1.4212e+06	1.2789e+06	1.29429e+06	1.47822e+06	1.32099e+06	1.60487e+06	1.35465e+06	1.64798e+06	1.01911e+06	1.39379e+06	1.14795e+06	1.40444e+06	1.2342e+06	1.56255e+06	690868	809180	678380	835986	669578
Q6P1B1	2	2	84.1	6.29334e-09	1.44055	Condition 1	Condition 3	Xaa-Pro aminopeptidase 1 OS=Mus musculus GN=Xpnpep1 PE=1 SV=1	695570	650905	704133	670408	641664	664919	520296	448426	516598	440684	497956	466684	504121	400586	467221	465127	498523	460292	512110	507812	523628	522298	567292	498675	552828	581818	543919	637346	502636	630595	387928	448426	429645	441719	427303	471234	269762	232691	263494	320370	281720
Q9ESZ8	15	15	634.09	6.41792e-09	1.28456	Condition 3	Condition 1	General transcription factor II-I OS=Mus musculus GN=Gtf2i PE=1 SV=3	792238	823356	763365	766751	788210	797472	835022	823642	859794	841794	829340	847427	1.04462e+06	1.13818e+06	951159	976346	1.00051e+06	966931	927272	1.0013e+06	903838	953649	905336	948691	629658	735965	589674	728938	617430	756305	622585	823642	715076	843769	711667	855689	558993	661142	536416	672488	565400
O08810	23	22	1638.94	6.52128e-09	1.35993	Condition 3	Condition 1	116 kDa U5 small nuclear ribonucleoprotein component OS=Mus musculus GN=Eftud2 PE=1 SV=1	855401	933895	911517	897297	918608	968587	1.22363e+06	1.18098e+06	1.14632e+06	1.18228e+06	1.08708e+06	1.25478e+06	1.23236e+06	1.35485e+06	1.22105e+06	1.30125e+06	1.14275e+06	1.20737e+06	1.12612e+06	1.17784e+06	1.16321e+06	1.26197e+06	1.31473e+06	1.26249e+06	679859	834771	704116	853045	719575	918588	912326	1.18098e+06	953377	1.18505e+06	932839	1.26701e+06	659452	787001	688622	896276	645777
O35098	23	22	1885.2	6.58237e-09	1.40876	Condition 1	Condition 3	Dihydropyrimidi0se-related protein 4 OS=Mus musculus GN=Dpysl4 PE=1 SV=1	3.85206e+06	3.86164e+06	3.84348e+06	3.8923e+06	3.56751e+06	4.01769e+06	2.91508e+06	2.84838e+06	2.79402e+06	3.2425e+06	2.60244e+06	2.89148e+06	2.86302e+06	3.04809e+06	2.48446e+06	2.55222e+06	2.67794e+06	2.72529e+06	2.90193e+06	3.00398e+06	2.90616e+06	2.90798e+06	3.1122e+06	2.95972e+06	3.06156e+06	3.45176e+06	2.96896e+06	3.70035e+06	2.79455e+06	3.8103e+06	2.17346e+06	2.84838e+06	2.32374e+06	3.25011e+06	2.23319e+06	2.91967e+06	1.53204e+06	1.77057e+06	1.40114e+06	1.75792e+06	1.51333e+06
Q8BLE7	3	3	123.07	6.64858e-09	1.53931	Condition 1	Condition 2	Vesicular glutamate transporter 2 OS=Mus musculus GN=Slc17a6 PE=1 SV=1	390598	429389	411726	390810	320355	390060	241328	231231	253444	259608	260418	269546	220643	283019	252735	274485	251823	269845	319183	323478	357278	329156	314191	320944	310441	383813	318044	371536	250945	369924	179932	231231	210785	260217	223468	272174	118069	164399	142532	189060	142307
Q9Z315	7	5	377.94	6.94106e-09	1.47185	Condition 3	Condition 1	U4/U6.U5 tri-snRNP-associated protein 1 OS=Mus musculus GN=Sart1 PE=1 SV=1	418060	394402	367678	372540	364617	386528	502761	537188	462939	513035	466556	509390	562372	655681	546454	544992	525254	556125	497878	557555	501249	499415	472956	506774	332267	352540	284019	354168	285616	366575	374854	537188	385018	514239	400358	514356	300934	380870	308178	375380	296826
Q61553	15	15	1317.17	6.99902e-09	1.36831	Condition 1	Condition 3	Fascin OS=Mus musculus GN=Fscn1 PE=1 SV=4	5.22433e+06	5.0805e+06	5.45096e+06	5.57039e+06	5.06588e+06	5.11233e+06	4.39226e+06	4.76154e+06	4.65023e+06	4.59016e+06	4.1089e+06	4.32375e+06	4.05845e+06	3.679e+06	3.64065e+06	3.84947e+06	3.67648e+06	4.12021e+06	4.41254e+06	4.49083e+06	4.18208e+06	4.31994e+06	4.7489e+06	4.43735e+06	4.15221e+06	4.54125e+06	4.21068e+06	5.29568e+06	3.96827e+06	4.84843e+06	3.27483e+06	4.76154e+06	3.86751e+06	4.60093e+06	3.5259e+06	4.3659e+06	2.17173e+06	2.13705e+06	2.05319e+06	2.65144e+06	2.07761e+06
O35250	10	10	582.93	7.0434e-09	1.30412	Condition 1	Condition 3	Exocyst complex component 7 OS=Mus musculus GN=Exoc7 PE=1 SV=2	825460	740995	832123	783490	808617	777511	735528	682771	687304	736239	661239	634953	572817	631138	603059	646247	606759	596239	634851	611116	628845	613457	636717	575533	656063	662345	642787	744851	633416	737375	548403	682771	571618	737967	567418	641143	306523	366614	340101	445122	342885
Q80UW8	2	2	66.07	7.29902e-09	1.80918	Condition 2	Condition 1	D0-directed R0 polymerases I, II, and III subunit RPABC1 OS=Mus musculus GN=Polr2e PE=1 SV=1	109984	82392.6	92865.8	108658	99924.8	106047	181363	170267	166056	183000	178204	206389	173017	122414	157422	152539	177282	165419	165097	145505	165532	166199	165602	157767	87413.4	73647.3	71735.7	103299	78274.4	100573	135223	170267	138106	183429	152919	208401	92583.7	71107.8	88780	105066	100184
Q91V09	7	7	597.82	7.44287e-09	1.31978	Condition 1	Condition 2	WD repeat-containing protein 13 OS=Mus musculus GN=Wdr13 PE=1 SV=1	912359	1.02757e+06	972515	973731	964943	907605	726598	724215	749591	702951	764963	695084	803781	701584	804318	734120	799549	735738	821223	738118	757765	768103	747906	796710	725128	918503	751235	925709	755871	860753	541745	724215	623421	704601	656425	701860	430115	407535	453604	505648	451832
P51660	18	18	1379.98	7.56043e-09	1.29156	Condition 3	Condition 1	Peroxisomal multifunctio0l enzyme type 2 OS=Mus musculus GN=Hsd17b4 PE=1 SV=3	1.37099e+06	1.41258e+06	1.37561e+06	1.44523e+06	1.37022e+06	1.3762e+06	1.72276e+06	1.61353e+06	1.62146e+06	1.75532e+06	1.63264e+06	1.68906e+06	1.82094e+06	2.03104e+06	1.73802e+06	1.80484e+06	1.71872e+06	1.67201e+06	1.35857e+06	1.44954e+06	1.48351e+06	1.41557e+06	1.53017e+06	1.46565e+06	1.08965e+06	1.26265e+06	1.06261e+06	1.37395e+06	1.07334e+06	1.30516e+06	1.28448e+06	1.61353e+06	1.34854e+06	1.75944e+06	1.40099e+06	1.70553e+06	974414	1.17979e+06	980175	1.24314e+06	971267
Q66JS6	7	7	346.39	7.63888e-09	1.93821	Condition 1	Condition 4	Eukaryotic translation initiation factor 3 subunit J-B OS=Mus musculus GN=Eif3j2 PE=1 SV=1	406875	446875	473036	434402	445794	456476	230957	210343	297584	214024	302611	297634	240613	287037	238622	236243	285267	263023	207419	239543	206596	228461	265737	226427	323378	399443	365405	412978	349205	432912	172199	210343	247496	214527	259674	300536	128756	166733	134574	162720	161207
P19783	4	4	207.7	7.63926e-09	1.55004	Condition 4	Condition 1	Cytochrome c oxidase subunit 4 isoform 1, mitochondrial OS=Mus musculus GN=Cox4i1 PE=1 SV=2	672237	729775	774857	741509	640038	813603	762730	799918	773668	788602	829191	771691	1.00246e+06	944166	808667	856990	832719	957183	1.24357e+06	1.01366e+06	1.15828e+06	1.14628e+06	1.09094e+06	1.12408e+06	534283	652316	598551	704941	501363	771604	568685	799918	643446	790453	711540	779215	536433	548445	456056	590278	470577
O88745	1	1	35.48	7.72749e-09	1.73454	Condition 1	Condition 4	Scrapie-responsive protein 1 OS=Mus musculus GN=Scrg1 PE=2 SV=1	103605	141274	129451	124434	126455	125429	70542.3	66761.9	69360	73771.8	87269.2	69851.8	60515	82944.6	77895	77513.6	85313.5	74161.8	78343.9	71834.8	68547	64267.6	72215.6	77555.5	82343.5	126279	99996.5	118297	99056	118954	52595.7	66761.9	57685.5	73944.9	74886.9	70532.8	32382.4	48180.7	43929.7	53389.9	48211.4
P62717	1	1	32.69	7.80785e-09	Infinity	Condition 1	Condition 2	60S ribosomal protein L18a OS=Mus musculus GN=Rpl18a PE=1 SV=1	45614.1	47082.1	36337.9	40453.3	32268.4	33234.7	0	0	0	0	0	0	0	0	0	0	0	0	0	0	644.344	944.25	0	669.673	36253.4	42084.7	28069.8	38458.3	25276.9	31519.1	0	0	0	0	0	0	0	0	0	0	0
P97478	1	1	43.29	8.03569e-09	2.16816	Condition 4	Condition 2	5-demethoxyubiquinone hydroxylase, mitochondrial OS=Mus musculus GN=Coq7 PE=1 SV=3	206513	192262	266155	202886	235644	211378	162118	154129	155917	147257	143402	136153	218614	129297	213177	189927	205171	204790	345806	296972	313176	319428	339102	334639	164133	171855	205596	192880	184588	200466	120874	154129	129673	147602	123055	137481	116983	75105.7	120223	130818	115944
Q9D7V9	1	1	28.06	8.21358e-09	1.79845	Condition 4	Condition 1	N-acylethanolamine-hydrolyzing acid amidase OS=Mus musculus GN=0aa PE=1 SV=2	54188.8	36619.7	44236.8	49238.6	45559.7	45174.9	41446.6	56104.9	39359.4	59017.3	50186.4	44353.2	83858.1	97267.1	80098.6	78718.5	73432	77113.1	79272.6	78712.7	89471.4	92404.2	79725	75021.9	43068.4	32732.9	34171.4	46810.3	35688.4	42842.9	30902.2	56104.9	32734.5	59155.8	43065.6	44785.6	44873.7	56500.3	45172.4	54219.8	41497.1
Q99NB1	5	5	314.89	8.40073e-09	1.57617	Condition 4	Condition 1	Acetyl-coenzyme A synthetase 2-like, mitochondrial OS=Mus musculus GN=Acss1 PE=1 SV=1	296277	262579	254722	244868	327116	297619	327812	307926	301880	287830	305109	310047	287734	349628	315810	312602	339501	327723	403375	449121	416119	448991	465793	469585	235477	234709	196764	232792	256240	282255	244414	307926	251068	288506	261818	313070	153971	203091	178104	215314	191855
Q8BP71	5	5	248.49	8.80357e-09	1.45034	Condition 3	Condition 1	R0 binding protein fox-1 homolog 2 OS=Mus musculus GN=Rbfox2 PE=1 SV=2	391558	415536	401189	385754	376048	403405	498377	531601	530413	491551	546261	522330	551533	552626	543857	617402	570586	606353	495150	549148	448857	545282	457552	545957	311204	371431	309905	366730	294571	382581	371585	531601	441135	492704	468754	527423	295134	321008	306714	425255	322444
Q9Z2E4	1	1	65.1	8.84177e-09	3.10524	Condition 2	Condition 4	Protein phosphatase 1 regulatory subunit 17 OS=Mus musculus GN=Ppp1r17 PE=1 SV=1	49839.5	65906.3	53825.6	55181.3	48877.1	54555.8	179200	160990	170769	157639	178457	157127	79165.9	107576	89169.9	94705.9	78026.9	87538.5	53367.9	50067.9	34489.6	102625	39067.1	43765.3	39611.6	58910.9	41578.5	52459.9	38287	51739.6	133610	160990	142025	158009	153136	158659	42362.8	62488.5	50288.3	65231.6	44093.7
Q3TDK6	10	10	474.69	8.84972e-09	1.32577	Condition 1	Condition 3	Protein rogdi homolog OS=Mus musculus GN=Rogdi PE=1 SV=2	2.122e+06	2.04741e+06	2.09424e+06	2.11996e+06	2.05611e+06	1.91505e+06	1.75496e+06	1.62388e+06	1.6926e+06	1.72211e+06	1.70758e+06	1.59542e+06	1.61341e+06	1.66427e+06	1.54999e+06	1.47724e+06	1.4872e+06	1.5268e+06	1.74285e+06	1.80714e+06	1.70052e+06	1.62497e+06	1.91752e+06	1.78216e+06	1.68653e+06	1.8301e+06	1.61773e+06	2.01541e+06	1.61062e+06	1.8162e+06	1.30848e+06	1.62388e+06	1.40771e+06	1.72615e+06	1.4653e+06	1.61097e+06	863357	966740	874132	1.01749e+06	840433
Q922Q1	2	2	99.12	8.96842e-09	2.65784	Condition 4	Condition 1	Mitochondrial amidoxime reducing component 2 OS=Mus musculus GN=Marc2 PE=1 SV=1	103066	95787.5	81061.9	89562	107696	79718.8	183652	131824	183983	146883	166714	161838	191718	108610	164461	165887	200929	180679	228410	228169	285651	219970	279265	238663	81914.9	85620.6	62617.6	85145.1	84361.9	75603.6	136929	131824	153015	147227	143059	163416	102591	63088.9	92749.7	114260	113547
O88532	17	17	1304.88	9.30934e-09	1.47631	Condition 3	Condition 1	Zinc finger R0-binding protein OS=Mus musculus GN=Zfr PE=1 SV=2	1.2557e+06	1.36762e+06	1.15663e+06	1.17944e+06	1.37993e+06	1.33216e+06	1.33425e+06	1.46e+06	1.30763e+06	1.42189e+06	1.43702e+06	1.39198e+06	2.03213e+06	2.10654e+06	1.70854e+06	1.95838e+06	1.64933e+06	1.87053e+06	1.72702e+06	1.71524e+06	1.61929e+06	1.71204e+06	1.60873e+06	1.72275e+06	998011	1.22246e+06	893454	1.12127e+06	1.08094e+06	1.26339e+06	994806	1.46e+06	1.08753e+06	1.42522e+06	1.23313e+06	1.40555e+06	1.08742e+06	1.22364e+06	963551	1.34889e+06	932050
P12960	25	24	1780.37	9.56961e-09	1.25413	Condition 1	Condition 2	Contactin-1 OS=Mus musculus GN=Cntn1 PE=1 SV=1	3.59994e+06	3.8308e+06	3.47659e+06	3.76483e+06	3.67428e+06	3.6344e+06	3.0661e+06	2.69504e+06	2.89082e+06	2.93042e+06	2.93553e+06	3.00882e+06	3.11235e+06	3.49076e+06	3.16151e+06	3.05114e+06	3.09113e+06	3.02625e+06	3.01122e+06	2.94649e+06	2.91313e+06	2.87944e+06	2.95736e+06	3.04265e+06	2.86118e+06	3.42419e+06	2.68555e+06	3.57917e+06	2.87818e+06	3.44679e+06	2.28606e+06	2.69504e+06	2.40425e+06	2.9373e+06	2.51902e+06	3.03816e+06	1.66546e+06	2.0277e+06	1.78297e+06	2.10157e+06	1.74682e+06
P09813	1	1	98.6	1.00137e-08	1.53851	Condition 4	Condition 1	Apolipoprotein A-II OS=Mus musculus GN=Apoa2 PE=1 SV=2	792093	1.14107e+06	992804	999810	1.02507e+06	983278	1.31803e+06	1.23027e+06	1.44493e+06	1.25629e+06	1.43583e+06	1.16906e+06	1.59054e+06	1.46091e+06	1.48932e+06	1.54041e+06	1.48003e+06	1.51262e+06	1.48359e+06	1.62604e+06	1.55778e+06	1.5451e+06	1.44215e+06	1.47508e+06	629543	1.01995e+06	766908	950503	802974	932520	982708	1.23027e+06	1.20172e+06	1.25924e+06	1.2321e+06	1.18046e+06	851121	848612	839920	1.06101e+06	836379
Q9CPX8	1	1	50.03	1.0092e-08	5.56172	Condition 4	Condition 1	Cytochrome b-c1 complex subunit 10 OS=Mus musculus GN=Uqcr11 PE=3 SV=1	37718.7	43144.1	44482.5	37379.5	35822.6	37341.5	197996	128011	195627	140675	130094	149811	158888	47624.1	125964	111969	197838	110506	194854	211754	283299	259303	178101	184636	29978.2	38564.7	34361.2	35536	28061	35413.9	147624	128011	162700	141005	111636	151271	85023.1	27663.8	71038.7	77121.7	111800
Q60780	12	12	1071.51	1.02022e-08	1.47974	Condition 1	Condition 3	Growth arrest-specific protein 7 OS=Mus musculus GN=Gas7 PE=1 SV=1	3.99435e+06	4.34722e+06	4.52335e+06	4.25743e+06	4.89576e+06	4.14175e+06	3.55582e+06	3.29563e+06	3.46175e+06	3.61939e+06	3.24531e+06	3.15969e+06	2.80353e+06	3.22222e+06	2.69242e+06	2.91893e+06	2.88488e+06	3.15675e+06	3.34145e+06	2.97442e+06	2.73649e+06	2.90527e+06	2.81226e+06	3.2462e+06	3.17465e+06	3.8858e+06	3.49414e+06	4.04747e+06	3.83501e+06	3.92795e+06	2.65119e+06	3.29563e+06	2.87907e+06	3.62788e+06	2.78484e+06	3.1905e+06	1.50021e+06	1.87171e+06	1.51842e+06	2.0105e+06	1.63027e+06
Q9CU62	28	28	1495.56	1.031e-08	1.84515	Condition 3	Condition 1	Structural mainte0nce of chromosomes protein 1A OS=Mus musculus GN=Smc1a PE=1 SV=4	716418	867005	657931	741782	714166	696836	1.53956e+06	1.66707e+06	1.17346e+06	1.34616e+06	1.06468e+06	1.17339e+06	1.28452e+06	1.47843e+06	1.34053e+06	1.29458e+06	1.32839e+06	1.38139e+06	1.08297e+06	1.07009e+06	1.03285e+06	1.08936e+06	1.26965e+06	1.06073e+06	569398	774980	508230	705200	559429	660864	1.14788e+06	1.66707e+06	975945	1.34932e+06	913617	1.18483e+06	687367	858787	756005	891682	750683
Q6PDQ2	37	37	2030.72	1.04027e-08	1.36786	Condition 4	Condition 1	Chromodomain-helicase-D0-binding protein 4 OS=Mus musculus GN=Chd4 PE=1 SV=1	1.33682e+06	1.5037e+06	1.37207e+06	1.36471e+06	1.50846e+06	1.24407e+06	1.86761e+06	1.76048e+06	1.69843e+06	1.72028e+06	1.77605e+06	1.76602e+06	2.08148e+06	1.80055e+06	1.74369e+06	1.79928e+06	1.82954e+06	1.7391e+06	1.8479e+06	1.95048e+06	1.99842e+06	1.85714e+06	1.86456e+06	1.87549e+06	1.06248e+06	1.3441e+06	1.05988e+06	1.2974e+06	1.18162e+06	1.17985e+06	1.39248e+06	1.76048e+06	1.41255e+06	1.72432e+06	1.52405e+06	1.78324e+06	1.11383e+06	1.0459e+06	983374	1.23931e+06	1.03389e+06
O70133	14	12	737.64	1.06031e-08	1.31977	Condition 2	Condition 1	ATP-dependent R0 helicase A OS=Mus musculus GN=Dhx9 PE=1 SV=2	717074	683939	669955	697531	734339	658216	972667	871676	921616	850498	956275	918912	923329	829315	910729	880282	933378	855503	863530	819895	852731	809751	913353	794026	569919	611345	517518	663131	575232	624238	725212	871676	766492	852494	820592	927871	494087	481731	513615	606321	527461
P61750	7	7	384.57	1.06517e-08	1.2757	Condition 1	Condition 2	ADP-ribosylation factor 4 OS=Mus musculus GN=Arf4 PE=1 SV=2	6.34717e+06	6.25851e+06	6.60487e+06	6.19848e+06	6.72748e+06	6.12641e+06	5.38401e+06	4.89149e+06	4.9067e+06	4.96384e+06	4.86936e+06	4.97832e+06	5.51329e+06	5.04897e+06	5.0522e+06	4.56452e+06	5.10095e+06	5.18597e+06	5.50441e+06	5.7256e+06	5.70551e+06	5.52651e+06	5.49148e+06	5.28412e+06	5.04463e+06	5.59423e+06	5.10204e+06	5.8928e+06	5.26986e+06	5.81016e+06	4.01427e+06	4.89149e+06	4.08082e+06	4.97549e+06	4.17846e+06	5.02686e+06	2.95024e+06	2.93283e+06	2.84924e+06	3.14395e+06	2.88259e+06
P00493	8	8	498.2	1.0682e-08	1.42558	Condition 1	Condition 2	Hypoxanthine-guanine phosphoribosyltransferase OS=Mus musculus GN=Hprt1 PE=1 SV=3	1.37054e+06	1.43104e+06	1.40503e+06	1.58722e+06	1.32578e+06	1.45804e+06	963963	1.00588e+06	1.02593e+06	1.07496e+06	927016	1.01923e+06	1.18519e+06	1.25716e+06	1.00758e+06	1.13949e+06	1.1372e+06	1.09211e+06	1.20743e+06	1.21571e+06	1.31045e+06	1.27783e+06	1.31043e+06	1.2376e+06	1.08928e+06	1.27915e+06	1.08534e+06	1.50894e+06	1.03853e+06	1.38278e+06	718722	1.00588e+06	853248	1.07748e+06	795485	1.02916e+06	634211	730254	568238	784858	642642
Q9ES07	1	1	19.15	1.07271e-08	1.86958	Condition 3	Condition 1	Solute carrier family 15 member 2 OS=Mus musculus GN=Slc15a2 PE=1 SV=1	352450	340017	287441	302595	289785	290426	440693	484416	414666	418379	528333	394131	622959	564507	623131	548291	594884	528730	555825	425293	573330	508612	440771	443232	280122	303927	222039	287672	226998	275434	328577	484416	344870	419360	453370	397974	333354	327910	351421	377652	336174
Q9Z0H4	14	14	1149.52	1.09452e-08	1.36201	Condition 4	Condition 1	CUGBP Elav-like family member 2 OS=Mus musculus GN=Celf2 PE=1 SV=1	1.82879e+06	2.02059e+06	1.84877e+06	1.8873e+06	1.7588e+06	1.883e+06	2.26212e+06	2.12122e+06	2.17953e+06	2.06015e+06	2.23988e+06	2.11182e+06	2.08617e+06	2.27851e+06	2.1936e+06	2.30819e+06	2.17128e+06	2.31464e+06	2.38353e+06	2.63213e+06	2.41833e+06	2.68236e+06	2.40024e+06	2.77503e+06	1.45349e+06	1.80612e+06	1.42812e+06	1.79423e+06	1.37773e+06	1.7858e+06	1.68662e+06	2.12122e+06	1.81268e+06	2.06498e+06	1.92207e+06	2.13241e+06	1.11634e+06	1.32353e+06	1.2371e+06	1.58983e+06	1.22701e+06
Q8BVE3	17	17	1242.82	1.10908e-08	1.47873	Condition 1	Condition 3	V-type proton ATPase subunit H OS=Mus musculus GN=Atp6v1h PE=1 SV=1	6.83199e+06	6.52748e+06	7.13454e+06	7.0416e+06	6.80675e+06	6.22095e+06	5.14657e+06	5.17493e+06	5.94881e+06	4.82255e+06	5.45e+06	4.59179e+06	4.83039e+06	4.37367e+06	4.70259e+06	4.35385e+06	4.93517e+06	4.23555e+06	5.34744e+06	5.14013e+06	5.44696e+06	5.2839e+06	5.61824e+06	5.19518e+06	5.42996e+06	5.83464e+06	5.51119e+06	6.69434e+06	5.33195e+06	5.89982e+06	3.83724e+06	5.17493e+06	4.94752e+06	4.83387e+06	4.67672e+06	4.63656e+06	2.58481e+06	2.54057e+06	2.65207e+06	2.99885e+06	2.78891e+06
Q00915	1	1	85.36	1.12683e-08	1.56904	Condition 1	Condition 2	Retinol-binding protein 1 OS=Mus musculus GN=Rbp1 PE=1 SV=2	336093	352998	390498	351468	337496	333546	218312	240822	216450	223575	210208	230365	303529	331304	299106	279656	278678	278277	321804	278825	334686	300263	267126	263091	267121	315530	301647	334134	264371	316328	162772	240822	180017	224100	180383	232611	162423	192447	168684	192622	157484
Q80X90	13	12	716.65	1.12806e-08	1.32191	Condition 3	Condition 2	Filamin-B OS=Mus musculus GN=Flnb PE=1 SV=3	430244	459177	480531	476845	466687	406911	453577	448482	399989	443592	457357	476926	614301	621774	579077	586661	588934	551860	506743	525005	532058	507914	508313	502822	341951	410440	371194	453329	365571	385905	338183	448482	332664	444634	392464	481576	328721	361175	326577	404081	332812
Q4KMM3	18	18	1529.23	1.15813e-08	1.29127	Condition 1	Condition 2	Oxidation resistance protein 1 OS=Mus musculus GN=Oxr1 PE=1 SV=3	1.94412e+06	1.94092e+06	1.92546e+06	1.95269e+06	1.71923e+06	1.8895e+06	1.56503e+06	1.34668e+06	1.4867e+06	1.48974e+06	1.44993e+06	1.46868e+06	1.5147e+06	1.61705e+06	1.4639e+06	1.49809e+06	1.55164e+06	1.48672e+06	1.67772e+06	1.55914e+06	1.69448e+06	1.57809e+06	1.54403e+06	1.58383e+06	1.54516e+06	1.73491e+06	1.48735e+06	1.85639e+06	1.34673e+06	1.79196e+06	1.16687e+06	1.34668e+06	1.23646e+06	1.49324e+06	1.2442e+06	1.483e+06	810537	939308	825581	1.03186e+06	876848
Q9CPW0	4	4	248.06	1.16622e-08	1.33459	Condition 1	Condition 4	Contactin-associated protein-like 2 OS=Mus musculus GN=Cnt0p2 PE=1 SV=2	434020	450293	450043	409837	471220	401166	302382	345660	345413	314396	335408	361103	379437	371418	408829	385113	373103	363865	322222	319107	342225	320777	333558	322695	344952	402498	347643	389625	369122	380458	225454	345660	287274	315134	287818	364624	203042	215749	230564	265259	210844
P14094	7	7	489.62	1.1941e-08	1.29995	Condition 3	Condition 1	Sodium/potassium-transporting ATPase subunit beta-1 OS=Mus musculus GN=Atp1b1 PE=1 SV=1	9.94734e+06	9.55083e+06	9.51362e+06	9.81053e+06	8.75792e+06	9.45711e+06	1.20531e+07	1.18654e+07	1.17424e+07	1.14667e+07	1.19159e+07	1.18379e+07	1.24958e+07	1.4072e+07	1.17833e+07	1.21382e+07	1.18158e+07	1.18404e+07	1.08863e+07	1.16731e+07	1.09021e+07	1.12351e+07	1.07524e+07	1.09703e+07	7.90599e+06	8.5371e+06	7.34895e+06	9.32671e+06	6.86037e+06	8.96892e+06	8.98669e+06	1.18654e+07	9.76596e+06	1.14936e+07	1.02252e+07	1.19533e+07	6.68667e+06	8.17411e+06	6.64532e+06	8.36056e+06	6.6772e+06
Q7TMK9	20	18	1623.32	1.20312e-08	1.26935	Condition 3	Condition 1	Heterogeneous nuclear ribonucleoprotein Q OS=Mus musculus GN=Syncrip PE=1 SV=2	4.32807e+06	4.75129e+06	4.46074e+06	4.50443e+06	4.13373e+06	4.42204e+06	5.20086e+06	5.51824e+06	5.50547e+06	5.71018e+06	5.37457e+06	5.70521e+06	5.62159e+06	6.091e+06	5.394e+06	5.63432e+06	5.70272e+06	5.32137e+06	5.18295e+06	5.51508e+06	5.20063e+06	4.93626e+06	5.14043e+06	5.23708e+06	3.43988e+06	4.24698e+06	3.44577e+06	4.28229e+06	3.23808e+06	4.19377e+06	3.87771e+06	5.51824e+06	4.5788e+06	5.72358e+06	4.61199e+06	5.76083e+06	3.00819e+06	3.53813e+06	3.042e+06	3.88081e+06	3.22266e+06
Q9WUR2	7	6	515.37	1.23814e-08	1.39988	Condition 3	Condition 1	Enoyl-CoA delta isomerase 2, mitochondrial OS=Mus musculus GN=Eci2 PE=1 SV=2	885238	976580	869184	995654	894227	970918	1.0689e+06	1.03698e+06	951318	1.08864e+06	897553	1.05174e+06	1.3875e+06	1.34708e+06	1.16749e+06	1.31071e+06	1.36479e+06	1.25025e+06	1.34031e+06	1.17157e+06	1.29301e+06	1.3451e+06	1.24079e+06	1.41141e+06	703573	872925	671416	946552	700477	920798	796964	1.03698e+06	791194	1.09119e+06	770202	1.06199e+06	742472	782489	658416	902790	771258
P10639	5	5	228.28	1.24255e-08	1.46433	Condition 1	Condition 2	Thioredoxin OS=Mus musculus GN=Txn PE=1 SV=3	674665	747678	666688	704449	640015	604694	460275	494202	471767	507326	428164	395974	626942	669469	603356	612435	619503	616921	561012	600449	548179	556118	541809	567770	536213	668319	514994	669708	501345	573479	343177	494202	392361	508516	367413	399834	335486	388879	340269	421833	350087
Q9D4H8	6	6	247.22	1.24415e-08	1.52181	Condition 1	Condition 2	Cullin-2 OS=Mus musculus GN=Cul2 PE=1 SV=2	230329	226888	207748	210505	191945	199612	133160	151559	128291	131390	136478	151701	160769	159666	149461	150216	149744	145689	173948	165081	188247	147447	163968	154673	183062	202806	160479	200124	150356	189308	99282.7	151559	106698	131699	117114	153180	86029.9	92746.7	84290.1	103466	84621.5
Q3TGF2	2	2	74.55	1.31382e-08	2.04215	Condition 2	Condition 1	Protein FAM107B OS=Mus musculus GN=Fam107b PE=1 SV=2	74250.9	95904.3	90452.1	92916.1	92352.5	83183.9	154161	205204	185745	163769	178756	192787	145304	128463	148129	157383	182420	168217	102425	96669.2	60593.5	96285.2	92666.6	109468	59013.5	85724.9	69871.2	88333.8	72342.7	78889.9	114941	205204	154481	164154	153393	194667	77754.2	74621.1	83539.2	108403	103087
Q9Z2X1	8	8	440.52	1.34044e-08	1.44518	Condition 4	Condition 1	Heterogeneous nuclear ribonucleoprotein F OS=Mus musculus GN=Hnrnpf PE=1 SV=3	1.47099e+06	1.38945e+06	1.51392e+06	1.39199e+06	1.41415e+06	1.26983e+06	1.84744e+06	1.78421e+06	1.71508e+06	1.66425e+06	1.84256e+06	1.69999e+06	1.88203e+06	1.57038e+06	1.82115e+06	1.6686e+06	1.8427e+06	1.7825e+06	2.08314e+06	2.00579e+06	1.98879e+06	1.89682e+06	2.26381e+06	1.97392e+06	1.16912e+06	1.24197e+06	1.16945e+06	1.32334e+06	1.10775e+06	1.20428e+06	1.37744e+06	1.78421e+06	1.4264e+06	1.66816e+06	1.58113e+06	1.71656e+06	1.0071e+06	912197	1.02705e+06	1.1493e+06	1.04133e+06
O55126	15	15	1031.33	1.34349e-08	1.28028	Condition 4	Condition 1	Protein NipS0p homolog 2 OS=Mus musculus GN=Gbas PE=1 SV=1	3.26413e+06	3.4347e+06	3.09846e+06	3.29896e+06	3.2884e+06	3.40649e+06	3.55221e+06	3.67406e+06	3.56406e+06	3.84163e+06	3.60648e+06	3.45255e+06	4.23174e+06	4.37876e+06	3.87086e+06	4.03368e+06	3.7171e+06	3.9581e+06	4.27584e+06	4.28595e+06	3.96464e+06	4.1669e+06	4.24525e+06	4.39965e+06	2.59428e+06	3.07014e+06	2.39346e+06	3.13627e+06	2.57591e+06	3.23064e+06	2.6485e+06	3.67406e+06	2.96417e+06	3.85064e+06	3.09477e+06	3.48622e+06	2.26446e+06	2.54352e+06	2.18301e+06	2.77832e+06	2.10057e+06
P63011	11	9	1013.67	1.36308e-08	1.50835	Condition 1	Condition 2	Ras-related protein Rab-3A OS=Mus musculus GN=Rab3a PE=1 SV=1	6.91833e+06	7.15819e+06	7.04987e+06	7.62023e+06	7.22246e+06	6.70924e+06	4.96553e+06	4.42236e+06	4.78541e+06	4.62518e+06	4.7411e+06	4.75513e+06	5.98317e+06	5.46869e+06	5.66592e+06	5.5323e+06	6.71721e+06	5.55392e+06	6.85849e+06	7.2676e+06	7.7179e+06	7.01263e+06	6.07375e+06	5.85615e+06	5.49858e+06	6.39841e+06	5.44579e+06	7.24442e+06	5.65759e+06	6.3629e+06	3.70225e+06	4.42236e+06	3.97994e+06	4.63604e+06	4.0684e+06	4.80149e+06	3.20168e+06	3.17664e+06	3.19536e+06	3.81054e+06	3.79595e+06
Q920M5	7	7	240.23	1.37891e-08	1.35924	Condition 2	Condition 4	Coronin-6 OS=Mus musculus GN=Coro6 PE=1 SV=1	273454	302754	327938	333088	318305	317902	352519	343762	372878	359679	357587	348613	287019	299543	289436	259288	272198	270161	249030	254461	258131	268829	283819	256484	217337	270620	253321	316661	249338	301491	262835	343762	310116	360523	306850	352012	153588	173998	163230	178592	153822
P56671	2	2	82.84	1.38094e-08	1.59119	Condition 2	Condition 1	Myc-associated zinc finger protein OS=Mus musculus GN=Maz PE=1 SV=1	250037	237551	230632	196234	221628	200643	316422	379199	348736	327176	370162	385288	340109	298991	305308	312848	351794	359885	253043	293104	283629	290897	256835	261952	198726	212337	178155	186556	173608	190285	235922	379199	290037	327943	317641	389044	181997	173677	172181	215483	198802
P08228	11	11	1148.77	1.38395e-08	1.31219	Condition 1	Condition 2	Superoxide dismutase [Cu-Zn] OS=Mus musculus GN=Sod1 PE=1 SV=2	2.08512e+07	1.88255e+07	2.13416e+07	1.9802e+07	2.02211e+07	2.15675e+07	1.62923e+07	1.54026e+07	1.50526e+07	1.58097e+07	1.51097e+07	1.57718e+07	1.90102e+07	2.09354e+07	1.83731e+07	1.80699e+07	1.94037e+07	1.81297e+07	1.73025e+07	1.72475e+07	1.86436e+07	1.84571e+07	1.72151e+07	1.72035e+07	1.65722e+07	1.68274e+07	1.64856e+07	1.88254e+07	1.58399e+07	2.04541e+07	1.21474e+07	1.54026e+07	1.2519e+07	1.58468e+07	1.29658e+07	1.59256e+07	1.01726e+07	1.21609e+07	1.03617e+07	1.24462e+07	1.09652e+07
P35279	4	2	217.11	1.48029e-08	1.2978	Condition 1	Condition 2	Ras-related protein Rab-6A OS=Mus musculus GN=Rab6a PE=1 SV=4	571990	622518	571925	607031	524182	578340	473448	446467	415859	455427	454710	432450	441925	469856	458725	487210	449094	420688	484197	451160	462866	441952	468948	453743	454609	556443	441793	577094	410609	548485	352998	446467	345862	456495	390192	436666	236481	272929	258703	335581	253787
P48774	8	8	666.39	1.5712e-08	1.33096	Condition 1	Condition 2	Glutathione S-transferase Mu 5 OS=Mus musculus GN=Gstm5 PE=1 SV=1	2.67286e+06	2.81874e+06	2.9009e+06	2.88723e+06	2.66559e+06	2.646e+06	2.12358e+06	2.00465e+06	2.10271e+06	2.01168e+06	2.10602e+06	2.11705e+06	2.23719e+06	2.73319e+06	2.30784e+06	2.45332e+06	2.3365e+06	2.38395e+06	2.25381e+06	2.37526e+06	2.32534e+06	2.36322e+06	2.21789e+06	2.42415e+06	2.12435e+06	2.51956e+06	2.24085e+06	2.74485e+06	2.08804e+06	2.50941e+06	1.58333e+06	2.00465e+06	1.74878e+06	2.0164e+06	1.8072e+06	2.13769e+06	1.19715e+06	1.58765e+06	1.30153e+06	1.6898e+06	1.32038e+06
Q9CQF9	2	2	139.83	1.58343e-08	1.60824	Condition 4	Condition 2	Prenylcysteine oxidase OS=Mus musculus GN=Pcyox1 PE=1 SV=1	298331	298527	276730	291124	285801	283739	276554	252189	229753	248803	191339	266155	346914	393766	335681	349098	373733	355780	435493	404918	339868	411108	380069	384289	237109	266841	213765	276767	223877	269092	206196	252189	191082	249387	164191	268750	185639	228730	189311	240452	211200
Q6P9Z1	2	2	109.22	1.59173e-08	1.65412	Condition 4	Condition 1	SWI/SNF-related matrix-associated actin-dependent regulator of chromatin subfamily D member 3 OS=Mus musculus GN=Smarcd3 PE=1 SV=2	110264	89102.4	121046	119130	105346	108798	140909	131637	151736	153576	150651	146628	133503	132762	142927	157782	160800	150378	177492	181582	204734	175089	172448	169928	87636.4	79645	93503.6	113255	82520.8	103182	105060	131637	126196	153937	129275	148058	71439.4	77118.7	80605.1	108677	90869.3
P51859	7	7	472.26	1.62572e-08	1.50013	Condition 2	Condition 4	Hepatoma-derived growth factor OS=Mus musculus GN=Hdgf PE=1 SV=2	1.58023e+06	1.66812e+06	1.63136e+06	1.71998e+06	1.5302e+06	1.58185e+06	2.20076e+06	1.99311e+06	1.9229e+06	2.24088e+06	1.97186e+06	2.12537e+06	2.02206e+06	2.35414e+06	1.80692e+06	1.89968e+06	1.92656e+06	1.94503e+06	1.43254e+06	1.529e+06	1.2999e+06	1.4724e+06	1.19424e+06	1.37445e+06	1.25594e+06	1.49107e+06	1.26017e+06	1.63515e+06	1.19866e+06	1.50019e+06	1.64086e+06	1.99311e+06	1.59924e+06	2.24614e+06	1.69208e+06	2.14609e+06	1.08203e+06	1.36747e+06	1.01903e+06	1.30846e+06	1.08871e+06
P27671	7	7	299.21	1.63774e-08	1.49746	Condition 1	Condition 2	Ras-specific guanine nucleotide-releasing factor 1 OS=Mus musculus GN=Rasgrf1 PE=1 SV=2	466144	504837	472929	501988	448974	428112	316911	329309	330106	286525	319568	302764	482842	430739	399780	374838	392247	412303	435538	383771	438771	399889	440141	436378	370484	451253	365322	477232	351696	406013	236286	329309	274543	287198	274226	305716	258376	250207	225460	258182	221662
P61087	1	1	40.38	1.64612e-08	1.59095	Condition 1	Condition 2	Ubiquitin-conjugating enzyme E2 K OS=Mus musculus GN=Ube2k PE=1 SV=3	857513	747199	783064	912480	754444	719075	444777	541443	437785	527621	489757	559199	460350	556109	519805	569040	529037	495873	550490	621208	547772	588133	587456	558074	681538	667891	604891	867480	590980	681955	331622	541443	364098	528859	420267	564651	246340	323031	293149	391944	298964
Q80YN3	17	17	1180.35	1.65866e-08	1.30891	Condition 3	Condition 4	Breast carcinoma-amplified sequence 1 homolog OS=Mus musculus GN=Bcas1 PE=1 SV=3	5.36435e+06	5.60599e+06	5.24734e+06	5.30416e+06	4.68413e+06	5.06483e+06	4.98892e+06	4.89031e+06	5.16367e+06	5.01267e+06	5.06035e+06	5.01613e+06	5.28812e+06	5.74884e+06	5.22089e+06	5.04432e+06	5.45193e+06	5.2609e+06	4.44545e+06	3.94704e+06	4.30608e+06	3.93626e+06	3.82812e+06	3.99626e+06	4.2635e+06	5.01097e+06	4.05339e+06	5.04258e+06	3.66923e+06	4.80338e+06	3.71969e+06	4.89031e+06	4.29453e+06	5.02443e+06	4.34236e+06	5.06504e+06	2.82975e+06	3.33937e+06	2.94438e+06	3.47443e+06	3.08093e+06
Q9Z268	11	11	634.22	1.75276e-08	1.58312	Condition 1	Condition 3	RasGAP-activating-like protein 1 OS=Mus musculus GN=Rasal1 PE=1 SV=2	757387	718713	711143	640687	676476	673577	443994	491660	539309	548299	545484	574706	426589	502528	423455	424867	439394	422242	675935	658168	632372	656900	840363	606337	601959	642428	549334	609091	529905	638806	331038	491660	448534	549586	468087	580309	228274	291908	238812	292640	248306
Q9JJK2	8	7	785.6	1.81072e-08	1.22076	Condition 1	Condition 2	LanC-like protein 2 OS=Mus musculus GN=Lancl2 PE=1 SV=1	1.88431e+06	1.8859e+06	1.99854e+06	1.92963e+06	1.81132e+06	1.90837e+06	1.63345e+06	1.47441e+06	1.5973e+06	1.58512e+06	1.47893e+06	1.58401e+06	1.70952e+06	1.60243e+06	1.57495e+06	1.51298e+06	1.6093e+06	1.61115e+06	1.68781e+06	1.64961e+06	1.71116e+06	1.6505e+06	1.73048e+06	1.72622e+06	1.49762e+06	1.68573e+06	1.54381e+06	1.83447e+06	1.41886e+06	1.80986e+06	1.21788e+06	1.47441e+06	1.32844e+06	1.58884e+06	1.26909e+06	1.59945e+06	914790	930814	888211	1.04211e+06	909431
P62073	2	2	172.29	1.87106e-08	1.58033	Condition 4	Condition 1	Mitochondrial import inner membrane translocase subunit Tim10 OS=Mus musculus GN=Timm10 PE=1 SV=1	174396	180383	151396	154603	153943	145832	234018	206139	225329	213022	255548	243462	247855	225398	265743	277733	242804	217882	236997	248809	253837	264197	229470	284678	138607	161237	116948	146978	120589	138304	174482	206139	187402	213522	219289	245836	132631	130929	149869	191297	137211
Q9Z2I9	29	28	2198.75	1.88832e-08	1.23855	Condition 4	Condition 1	Succi0te--CoA ligase [ADP-forming] subunit beta, mitochondrial OS=Mus musculus GN=Sucla2 PE=1 SV=2	8.46189e+06	8.29408e+06	9.00204e+06	8.63025e+06	8.69625e+06	8.47243e+06	1.00587e+07	9.45548e+06	9.52667e+06	9.06801e+06	9.49273e+06	1.00133e+07	1.0171e+07	1.03759e+07	9.82345e+06	9.33588e+06	9.56782e+06	9.8579e+06	1.0847e+07	1.0594e+07	1.06595e+07	1.01652e+07	1.11965e+07	1.03936e+07	6.72538e+06	7.41374e+06	6.95378e+06	8.20464e+06	6.81206e+06	8.03507e+06	7.49967e+06	9.45548e+06	7.92316e+06	9.08929e+06	8.14584e+06	1.01109e+07	5.44267e+06	6.02712e+06	5.54004e+06	6.43037e+06	5.40686e+06
Q9CQJ6	3	3	148.34	1.90049e-08	1.23141	Condition 3	Condition 2	Density-regulated protein OS=Mus musculus GN=Denr PE=1 SV=1	535777	521527	530351	525604	514943	520638	410280	430840	404208	423213	441814	484730	562754	565219	524504	493328	519449	530360	436394	461929	421377	418757	438964	428784	425827	466172	409678	499683	403372	493762	305901	430840	336173	424207	379126	489456	301138	328323	295799	339795	293545
P35293	4	4	262.64	1.94143e-08	1.29205	Condition 1	Condition 2	Ras-related protein Rab-18 OS=Mus musculus GN=Rab18 PE=1 SV=2	847261	873505	835296	934238	860381	853168	660347	665610	677328	735617	619149	669553	682203	743697	622070	706355	678518	673515	763297	715198	761860	747780	739418	743386	673390	780791	645238	888164	673965	809126	492349	665610	563322	737343	531300	676081	365057	431997	350823	486524	383437
P11798	32	31	3085.26	1.99322e-08	1.6024	Condition 1	Condition 2	Calcium/calmodulin-dependent protein ki0se type II subunit alpha OS=Mus musculus GN=Camk2a PE=1 SV=2	9.42111e+07	1.02975e+08	9.74862e+07	1.01258e+08	9.45771e+07	9.25003e+07	6.39076e+07	5.99356e+07	5.98816e+07	6.12905e+07	5.69473e+07	6.1872e+07	7.03016e+07	9.42572e+07	6.67881e+07	6.43627e+07	7.33329e+07	6.6993e+07	8.36467e+07	8.29439e+07	8.07246e+07	7.6589e+07	8.34268e+07	7.53316e+07	7.48775e+07	9.20449e+07	7.53049e+07	9.62643e+07	7.40853e+07	8.77253e+07	4.76489e+07	5.99356e+07	4.98025e+07	6.14343e+07	4.88672e+07	6.24753e+07	3.76194e+07	5.47519e+07	3.76659e+07	4.43318e+07	4.14411e+07
Q80WC7	4	4	266.81	2.00761e-08	1.31889	Condition 3	Condition 1	Arf-GAP domain and FG repeat-containing protein 2 OS=Mus musculus GN=Agfg2 PE=1 SV=1	639204	591772	583428	587508	569550	589224	755441	694631	796376	742702	765044	750150	812878	734683	754151	805584	774779	814071	695960	746576	725056	752257	715913	632106	508030	528961	450679	558534	446147	558808	563250	694631	662332	744445	656494	757464	434983	426761	425311	554871	437835
Q60899	2	2	158.44	2.08672e-08	1.59773	Condition 4	Condition 1	ELAV-like protein 2 OS=Mus musculus GN=Elavl2 PE=2 SV=1	401950	425793	424966	423061	358740	420924	598104	505030	482868	495368	474071	454569	616442	657181	616983	488871	578309	589355	669440	631161	665123	604709	644058	708621	319464	380599	328272	402197	281013	399196	445941	505030	401593	496530	406807	459001	329867	381742	347954	336725	326808
P60843	16	16	1325.14	2.20137e-08	1.24999	Condition 1	Condition 3	Eukaryotic initiation factor 4A-I OS=Mus musculus GN=Eif4a1 PE=1 SV=1	8.5485e+06	9.03322e+06	9.16276e+06	8.99307e+06	8.5112e+06	8.78159e+06	7.82468e+06	6.96462e+06	7.88129e+06	7.85423e+06	7.62853e+06	7.00148e+06	7.20777e+06	6.91286e+06	7.17915e+06	6.99102e+06	6.96603e+06	7.16779e+06	7.40026e+06	7.30628e+06	7.65284e+06	7.13999e+06	7.91049e+06	7.38638e+06	6.79422e+06	8.07442e+06	7.07793e+06	8.54956e+06	6.6671e+06	8.32827e+06	5.83401e+06	6.96462e+06	6.55473e+06	7.87266e+06	6.54614e+06	7.06974e+06	3.85698e+06	4.01553e+06	4.04876e+06	4.81528e+06	3.93657e+06
Q91YP0	1	1	48.33	2.20441e-08	2.407	Condition 4	Condition 2	L-2-hydroxyglutarate dehydroge0se, mitochondrial OS=Mus musculus GN=L2hgdh PE=1 SV=1	164319	134443	137711	140966	142091	128546	139268	114484	141871	116499	116344	98704	200830	100891	195306	160716	179202	158489	278645	273819	329187	268749	315338	284559	130599	120173	106377	134014	111304	121910	103837	114484	117991	116772	99836.4	99666.4	107467	58605.5	110145	110698	101269
Q61069	3	3	172.54	2.20527e-08	1.91837	Condition 4	Condition 1	Upstream stimulatory factor 1 OS=Mus musculus GN=Usf1 PE=1 SV=1	97987.2	131104	118573	99740.5	83071.9	116200	158917	148487	185176	181455	162985	165217	193610	176641	195470	170242	210462	182950	212374	234830	200795	232227	188126	172215	77878.7	117189	91593.6	94821.6	65073	110202	118487	148487	154008	181881	139860	166828	103604	102607	110238	117260	118934
Q8K212	26	25	1665.73	2.21247e-08	1.24171	Condition 1	Condition 4	Phosphofurin acidic cluster sorting protein 1 OS=Mus musculus GN=Pacs1 PE=1 SV=2	1.93585e+06	2.02326e+06	1.88976e+06	1.9556e+06	1.89798e+06	1.94136e+06	1.60924e+06	1.71255e+06	1.66717e+06	1.72976e+06	1.61411e+06	1.78097e+06	1.70868e+06	1.73959e+06	1.54997e+06	1.57534e+06	1.55826e+06	1.54333e+06	1.62644e+06	1.5035e+06	1.56604e+06	1.60035e+06	1.53202e+06	1.54885e+06	1.53858e+06	1.80851e+06	1.45977e+06	1.85915e+06	1.48675e+06	1.84115e+06	1.19984e+06	1.71255e+06	1.38655e+06	1.73382e+06	1.38509e+06	1.79834e+06	914340	1.01049e+06	874124	1.08507e+06	880584
Q8C1B7	14	14	1321.65	2.2474e-08	1.29511	Condition 1	Condition 4	Septin-11 OS=Mus musculus GN=Sept11 PE=1 SV=4	1.98119e+07	2.13805e+07	2.01629e+07	1.97024e+07	1.85101e+07	2.00413e+07	1.88539e+07	1.93962e+07	1.86542e+07	2.03563e+07	1.86433e+07	2.19934e+07	1.62965e+07	1.77181e+07	1.47329e+07	1.56588e+07	1.64314e+07	1.62926e+07	1.52268e+07	1.57705e+07	1.45382e+07	1.5762e+07	1.51572e+07	1.59e+07	1.57462e+07	1.91112e+07	1.55751e+07	1.87307e+07	1.44996e+07	1.90067e+07	1.40573e+07	1.93962e+07	1.55144e+07	2.04041e+07	1.59981e+07	2.22079e+07	8.72052e+06	1.02921e+07	8.30877e+06	1.07855e+07	9.28554e+06
Q921G7	1	1	72.75	2.26673e-08	3.33397	Condition 4	Condition 1	Electron transfer flavoprotein-ubiquinone oxidoreductase, mitochondrial OS=Mus musculus GN=Etfdh PE=1 SV=1	118563	112713	127064	92859.4	229166	110840	275989	231286	191168	186150	168851	187165	388169	215830	316769	306432	369922	292177	495810	408947	506666	414720	435617	376097	94232.2	100749	98152.4	88279.9	179513	105119	205775	231286	158991	186587	144893	188989	207715	125371	178645	211065	209046
P06837	3	3	372.33	2.42338e-08	1.49219	Condition 4	Condition 2	Neuromodulin OS=Mus musculus GN=Gap43 PE=1 SV=1	5.33341e+06	4.98499e+06	4.95485e+06	5.31246e+06	4.7648e+06	4.87951e+06	3.87386e+06	4.17604e+06	4.4817e+06	3.92984e+06	4.63572e+06	3.95295e+06	5.59012e+06	5.42242e+06	5.38305e+06	5.82469e+06	5.21314e+06	5.80395e+06	6.30924e+06	6.32988e+06	5.81418e+06	7.13679e+06	5.40779e+06	6.38175e+06	4.23891e+06	4.45588e+06	3.82746e+06	5.05047e+06	3.73243e+06	4.62762e+06	2.88831e+06	4.17604e+06	3.72735e+06	3.93906e+06	3.97797e+06	3.99149e+06	2.99135e+06	3.14977e+06	3.03583e+06	4.01193e+06	2.946e+06
Q78JW9	2	2	191.16	2.42953e-08	1.5041	Condition 3	Condition 2	Ubiquitin domain-containing protein UBFD1 OS=Mus musculus GN=Ubfd1 PE=1 SV=2	524502	513515	588758	503282	522129	551057	429317	403619	371152	372307	351744	425218	662001	647345	556416	569847	585506	518566	497526	478375	518364	518853	493292	486553	416866	459010	454796	478462	409001	522611	320095	403619	308680	373181	301836	429364	354246	376028	313797	392499	330875
Q3UUG6	3	3	209.11	2.43771e-08	1.55796	Condition 4	Condition 1	TBC1 domain family member 24 OS=Mus musculus GN=Tbc1d24 PE=1 SV=2	466541	457726	583201	472498	381091	591640	521844	502549	481921	470558	532026	474513	801464	787960	689499	692794	762069	669167	796978	758280	787766	708332	738157	810675	370799	409142	450503	449196	298521	561099	389082	502549	400805	471662	456538	479139	428875	457708	388850	477183	430652
Q8VEH5	2	2	119.26	2.44314e-08	1.65412	Condition 1	Condition 2	EPM2A-interacting protein 1 OS=Mus musculus GN=Epm2aip1 PE=1 SV=1	413331	432155	455928	415540	370980	457025	206983	240044	291951	260755	242242	296580	248599	277016	260873	251436	274343	289850	267151	237826	292173	255121	293878	230461	328509	386286	352189	395047	290601	433433	154324	240044	242811	261367	207871	299471	133029	160913	147122	173185	155034
Q9CY57	4	4	198.71	2.51111e-08	1.48273	Condition 2	Condition 1	Chromatin target of PRMT1 protein OS=Mus musculus GN=Chtop PE=1 SV=2	391059	369889	325982	322977	324705	325844	471415	528875	513991	523150	542665	475003	481261	447108	511334	443146	498928	456658	449420	410268	457229	415013	391528	377322	310808	330629	251810	307049	254352	309024	351483	528875	427477	524378	465668	479634	257530	259715	288372	305231	281949
Q8VE47	5	4	356.83	2.64427e-08	1.68484	Condition 1	Condition 3	Ubiquitin-like modifier-activating enzyme 5 OS=Mus musculus GN=Uba5 PE=1 SV=2	415124	432499	402578	409333	404875	416706	233620	233332	235177	281485	257468	276636	233688	284852	237722	202706	303216	210427	308246	260317	283560	252499	275606	261038	329934	386593	310978	389146	317152	395195	174185	233332	195592	282145	220937	279333	125050	165464	134066	139620	171350
P47809	7	7	652.16	2.66868e-08	1.2917	Condition 1	Condition 2	Dual specificity mitogen-activated protein ki0se ki0se 4 OS=Mus musculus GN=Map2k4 PE=1 SV=2	1.90893e+06	1.86948e+06	2.07307e+06	1.92127e+06	1.82312e+06	1.95382e+06	1.53768e+06	1.48242e+06	1.46464e+06	1.45221e+06	1.44683e+06	1.5577e+06	1.53946e+06	1.7769e+06	1.5041e+06	1.51862e+06	1.54544e+06	1.47779e+06	1.64522e+06	1.56634e+06	1.50487e+06	1.49334e+06	1.59807e+06	1.52953e+06	1.51719e+06	1.67105e+06	1.60138e+06	1.82652e+06	1.42811e+06	1.85297e+06	1.14648e+06	1.48242e+06	1.21811e+06	1.45562e+06	1.24154e+06	1.57289e+06	823787	1.03216e+06	848254	1.046e+06	873342
P17182	37	34	3629.25	2.68411e-08	1.28349	Condition 1	Condition 2	Alpha-enolase OS=Mus musculus GN=Eno1 PE=1 SV=3	5.03799e+07	5.37142e+07	5.23264e+07	5.30669e+07	5.02629e+07	4.96386e+07	4.01162e+07	4.11208e+07	4.25397e+07	3.84557e+07	4.09552e+07	3.78647e+07	4.05623e+07	4.7001e+07	4.17906e+07	4.00352e+07	4.21481e+07	3.97365e+07	4.3805e+07	4.2865e+07	4.24615e+07	4.06808e+07	4.50949e+07	4.1991e+07	4.00411e+07	4.80129e+07	4.04204e+07	5.04498e+07	3.93726e+07	4.70762e+07	2.99103e+07	4.11208e+07	3.53795e+07	3.85459e+07	3.51442e+07	3.82339e+07	2.17055e+07	2.73018e+07	2.35682e+07	2.75755e+07	2.38182e+07
Q99MN1	12	12	761.25	2.72894e-08	1.25587	Condition 4	Condition 1	Lysine--tR0 ligase OS=Mus musculus GN=Kars PE=1 SV=1	1.07272e+06	1.21731e+06	1.08444e+06	1.21548e+06	1.11315e+06	1.13676e+06	1.17404e+06	1.16525e+06	1.07591e+06	1.21851e+06	1.1525e+06	1.21687e+06	1.3775e+06	1.46475e+06	1.27704e+06	1.40221e+06	1.29564e+06	1.37796e+06	1.40894e+06	1.44302e+06	1.43336e+06	1.40456e+06	1.39491e+06	1.5052e+06	852580	1.0881e+06	837695	1.15553e+06	871966	1.07808e+06	875351	1.16525e+06	894818	1.22137e+06	988979	1.22873e+06	737123	850841	720200	965816	732177
Q8C078	2	2	105.57	2.73761e-08	2.20852	Condition 1	Condition 3	Calcium/calmodulin-dependent protein ki0se ki0se 2 OS=Mus musculus GN=Camkk2 PE=1 SV=2	225544	235412	242496	210095	264122	221044	161806	204489	185841	194789	203869	211113	115380	66769.5	111729	96109.6	139929	103407	132042	132356	156551	149391	123616	122675	179259	210425	187320	199734	206895	209633	120641	204489	154560	195246	174942	213172	61741.7	38784.9	63010.8	66198.4	79075.3
P97355	2	2	80.45	2.77448e-08	1.58074	Condition 1	Condition 3	Spermine synthase OS=Mus musculus GN=Sms PE=1 SV=1	423744	447874	453253	552235	474578	427844	329386	355752	331633	357321	332730	347228	311588	342699	288133	270388	281528	264038	323757	340520	376645	337477	361739	371155	336785	400336	350123	525001	371753	405758	245587	355752	275813	358159	285520	350614	166735	199066	162496	186238	159094
O70325	7	7	509.73	2.79906e-08	1.35843	Condition 3	Condition 2	Phospholipid hydroperoxide glutathione peroxidase, mitochondrial OS=Mus musculus GN=Gpx4 PE=1 SV=4	721961	809965	709325	764608	739306	808945	698782	707524	711129	836457	700652	821335	1.06505e+06	1.05378e+06	918653	1.07833e+06	974160	990196	917580	936509	949071	930224	876239	932582	573803	723995	547930	726900	579123	767186	521006	707524	591434	838420	601238	829342	569926	612117	518084	742731	550507
Q9QZB7	9	8	603.86	2.83915e-08	1.35247	Condition 1	Condition 3	Actin-related protein 10 OS=Mus musculus GN=Actr10 PE=1 SV=2	597101	604597	673141	658914	590326	655383	607362	581156	665197	618663	556339	603515	477245	457543	488438	422482	466544	482232	483502	523801	557708	511326	526800	475189	474567	540425	519979	626419	462422	621551	452844	581156	553233	620115	477402	609399	255381	265777	275460	290998	263648
Q6X893	1	1	71.85	2.8916e-08	1.68419	Condition 4	Condition 1	Choline transporter-like protein 1 OS=Mus musculus GN=Slc44a1 PE=1 SV=3	189482	152354	216245	179835	148051	188418	237538	254909	223758	262021	195055	224116	309497	330263	273073	309243	260870	300806	305838	319527	292475	292798	290825	308004	150597	136183	167042	170966	115973	178691	177106	254909	186095	262636	167379	226301	165616	191843	154002	213000	147420
Q8R3P0	4	4	172.93	2.91622e-08	1.43624	Condition 2	Condition 4	Aspartoacylase OS=Mus musculus GN=Aspa PE=1 SV=2	1.66444e+06	2.07923e+06	1.74219e+06	1.78542e+06	1.59021e+06	1.8418e+06	2.17494e+06	2.30603e+06	2.14841e+06	2.27997e+06	2.11008e+06	2.22917e+06	1.69003e+06	1.96614e+06	1.74683e+06	1.8454e+06	1.75955e+06	1.67606e+06	1.57863e+06	1.54749e+06	1.5555e+06	1.45636e+06	1.60517e+06	1.48135e+06	1.32287e+06	1.85854e+06	1.34578e+06	1.69737e+06	1.24567e+06	1.74672e+06	1.62162e+06	2.30603e+06	1.78679e+06	2.28532e+06	1.81069e+06	2.25091e+06	904358	1.14209e+06	985145	1.27108e+06	994336
P62814	30	29	3187.81	2.92779e-08	1.29617	Condition 1	Condition 3	V-type proton ATPase subunit B, brain isoform OS=Mus musculus GN=Atp6v1b2 PE=1 SV=1	1.70638e+07	1.69102e+07	1.66368e+07	1.78322e+07	1.69351e+07	1.84557e+07	1.42249e+07	1.40466e+07	1.38321e+07	1.41278e+07	1.31704e+07	1.43692e+07	1.40302e+07	1.4842e+07	1.201e+07	1.30526e+07	1.34641e+07	1.27095e+07	1.52265e+07	1.54695e+07	1.45226e+07	1.56087e+07	1.50723e+07	1.53412e+07	1.35621e+07	1.51154e+07	1.28514e+07	1.69528e+07	1.32658e+07	1.7503e+07	1.06059e+07	1.40466e+07	1.15039e+07	1.4161e+07	1.13017e+07	1.45093e+07	7.50779e+06	8.62137e+06	6.77316e+06	8.99035e+06	7.60867e+06
Q9WTU0	3	3	157	3.06548e-08	2.37929	Condition 3	Condition 1	Lysine-specific demethylase PHF2 OS=Mus musculus GN=Phf2 PE=1 SV=2	157506	132161	134189	225528	140820	141689	251019	305555	308468	297739	226525	274482	298628	459076	393852	358129	353078	354474	371497	301662	289517	267071	261376	346316	125183	118133	103657	214405	110309	134375	187157	305555	256547	298438	194384	277158	159800	266667	222117	246672	199528
P84309	1	1	55.43	3.07654e-08	2.74947	Condition 2	Condition 1	Adenylate cyclase type 5 OS=Mus musculus GN=Adcy5 PE=1 SV=2	16150.7	31775.6	15988.3	25073.7	19672.7	23521.3	67213.4	52008.4	64596.1	68153.8	58305	53153.8	50520.8	44817.1	39331.4	48219.2	41150	47403.4	31955.5	28531.9	40366.6	30937	21678	32555	12836.3	28402.9	12350.5	23837.1	15410.2	22307.1	50113.7	52008.4	53723.4	68313.7	50032.3	53672.1	27034.4	26033.3	22181.3	33212.4	23254.2
Q8R0F8	4	4	213.6	3.16721e-08	1.29566	Condition 3	Condition 1	Acylpyruvase FAHD1, mitochondrial OS=Mus musculus GN=Fahd1 PE=1 SV=2	716177	655344	683149	758184	733714	704673	917338	810012	838561	872304	846924	839908	926765	1.00062e+06	867517	902388	914034	896833	857654	906425	890830	866008	948791	833263	569206	585785	527710	720793	574742	668297	683959	810012	697416	874351	726757	848097	495926	581241	489245	621547	516529
Q8R191	3	3	192.19	3.22112e-08	1.60599	Condition 1	Condition 2	Sy0ptogyrin-3 OS=Mus musculus GN=Syngr3 PE=1 SV=1	848274	869140	858820	886276	970718	874223	488848	542193	499460	532851	538935	702487	637026	711093	549554	612412	570957	621679	765568	898577	775785	720424	777818	822565	674195	776889	663410	842567	760395	829094	364481	542193	415392	534102	462468	709336	340882	413058	309927	421818	322653
O55042	9	8	1313.38	3.27609e-08	1.31245	Condition 4	Condition 2	Alpha-synuclein OS=Mus musculus GN=Snca PE=1 SV=2	3.52609e+07	4.09424e+07	3.75337e+07	3.62186e+07	3.69069e+07	3.65448e+07	3.05243e+07	2.92845e+07	2.88726e+07	2.93473e+07	2.71644e+07	2.98024e+07	2.9691e+07	3.54566e+07	2.87189e+07	3.24305e+07	2.97424e+07	2.99003e+07	3.72032e+07	3.87833e+07	3.61926e+07	4.11268e+07	3.82996e+07	3.80682e+07	2.80248e+07	3.65967e+07	2.89935e+07	3.44324e+07	2.89104e+07	3.46583e+07	2.27586e+07	2.92845e+07	2.40128e+07	2.94162e+07	2.33101e+07	3.0093e+07	1.58881e+07	2.0596e+07	1.61963e+07	2.23375e+07	1.68077e+07
P46096	5	4	310.97	3.2997e-08	1.51382	Condition 1	Condition 3	Sy0ptotagmin-1 OS=Mus musculus GN=Syt1 PE=1 SV=1	777644	789756	774199	779452	718372	785300	556356	580941	627770	547630	562435	627292	530934	495472	477093	482285	570553	498660	649620	776603	908388	876552	749676	662568	618060	705931	598043	741012	562724	744762	414814	580941	522105	548915	482633	633408	284111	287808	269061	332189	322424
Q9DAK9	1	1	72.35	3.3028e-08	1.48032	Condition 4	Condition 2	14 kDa phosphohistidine phosphatase OS=Mus musculus GN=Phpt1 PE=1 SV=1	387183	339529	336527	331579	365006	351350	265750	277011	227958	292015	301357	241229	381586	393382	360746	392339	368170	359113	411776	387323	415995	354381	388984	417926	307727	303491	259956	315226	285921	333213	198141	277011	189589	292700	258599	243581	204192	228507	203447	270235	208056
Q8BP67	1	1	99.39	3.32593e-08	1.51299	Condition 1	Condition 2	60S ribosomal protein L24 OS=Mus musculus GN=Rpl24 PE=1 SV=2	1.48353e+06	1.44306e+06	1.44747e+06	1.50069e+06	1.42403e+06	1.35947e+06	917695	986871	871253	948244	1.05868e+06	939842	923147	1.24215e+06	925229	931840	904144	976772	991776	1.19343e+06	1.001e+06	1.05729e+06	1.01834e+06	1.07705e+06	1.17909e+06	1.28989e+06	1.11812e+06	1.42668e+06	1.11549e+06	1.28929e+06	684225	986871	724606	950469	908469	949005	493989	721539	521793	641834	510940
Q9JM76	8	8	641.64	3.35169e-08	1.15158	Condition 1	Condition 2	Actin-related protein 2/3 complex subunit 3 OS=Mus musculus GN=Arpc3 PE=1 SV=3	5.1214e+06	5.09231e+06	5.57362e+06	5.30339e+06	5.03138e+06	5.19397e+06	4.6083e+06	4.4618e+06	4.4525e+06	4.47686e+06	4.56941e+06	4.62515e+06	4.68849e+06	4.44031e+06	4.65416e+06	4.58754e+06	4.65198e+06	4.48433e+06	4.53089e+06	4.64398e+06	4.81843e+06	4.62023e+06	4.82135e+06	4.59783e+06	4.07041e+06	4.55181e+06	4.30544e+06	5.04184e+06	3.94124e+06	4.92585e+06	3.43591e+06	4.4618e+06	3.70307e+06	4.48737e+06	3.92108e+06	4.67025e+06	2.50888e+06	2.57928e+06	2.62476e+06	3.15981e+06	2.62888e+06
Q8BLQ9	3	3	89.29	3.4205e-08	1.30436	Condition 4	Condition 3	Cell adhesion molecule 2 OS=Mus musculus GN=Cadm2 PE=1 SV=2	291996	273245	254960	288060	292885	308247	251100	238312	219809	236664	233978	242210	242224	220066	214874	222964	222626	236894	292637	291409	275102	283728	307561	323040	232074	244242	196948	273854	229426	292335	187218	238312	182812	237220	200780	244572	129618	127831	121180	153574	125808
Q60611	2	2	109.66	3.46015e-08	1.95446	Condition 1	Condition 3	D0-binding protein SATB1 OS=Mus musculus GN=Satb1 PE=1 SV=2	402429	398534	476259	475042	382355	402290	311128	265366	283470	268465	226160	311543	220265	239829	214439	241231	198737	183509	219716	240889	256184	225914	304762	302053	319844	356233	367894	451615	299512	381523	231974	265366	235757	269095	194071	314581	117867	139312	120935	166155	112308
Q9ESK9	1	1	25.35	3.6491e-08	1.67778	Condition 3	Condition 1	RB1-inducible coiled-coil protein 1 OS=Mus musculus GN=Rb1cc1 PE=1 SV=3	52169.7	56766.2	59694.5	62032	55421.5	59791.4	65195.7	65647.1	65614.4	62792.5	61239.5	76251.6	99241.3	91714.5	87236.9	105555	95130.9	101423	55294.1	74341.3	59738.6	74213.3	63048.9	77086.3	41463.7	50741	46112	58972.8	43413.5	56704.9	48609.4	65647.1	54570.4	62939.8	52550.4	76995.1	53105.5	53274.9	49198.2	72704.5	53759.3
Q9DCN2	3	3	264.75	3.69585e-08	1.65753	Condition 4	Condition 1	0DH-cytochrome b5 reductase 3 OS=Mus musculus GN=Cyb5r3 PE=1 SV=3	382342	417259	442844	415883	413952	396377	528267	416203	450067	532723	423871	466061	611444	472412	522236	558742	573471	549566	735184	671239	563651	694017	752366	675416	303879	372971	342082	395373	324262	375915	393871	416203	374313	533973	363729	470605	327193	274414	294520	384850	324074
Q6NV83	7	7	267.71	3.71217e-08	1.5261	Condition 3	Condition 1	U2 snRNP-associated SURP motif-containing protein OS=Mus musculus GN=U2surp PE=1 SV=3	423305	360291	415095	439740	426259	372964	613799	536312	488909	546694	489463	500162	608125	634229	656308	575771	613319	632341	562756	496327	571285	554918	482224	520029	336436	322050	320647	418053	333903	353711	457643	536312	406617	547977	420015	505038	325417	368410	370132	396580	346592
Q9Z1M8	6	6	323.99	3.76028e-08	1.53397	Condition 3	Condition 1	Protein Red OS=Mus musculus GN=Ik PE=1 SV=2	385492	370002	415453	399174	367232	316273	585723	525365	544062	533631	625335	571631	595829	473493	608583	525265	646111	607704	552020	585515	588841	562582	562313	511799	306383	330730	320924	379488	287664	299946	436710	525365	452487	534884	536608	577204	318837	275042	343217	361792	365123
P28867	1	1	93.8	4.02685e-08	1.88817	Condition 1	Condition 3	Protein ki0se C delta type OS=Mus musculus GN=Prkcd PE=1 SV=3	503845	650766	525174	519013	512873	524502	467801	388298	473943	556139	426559	435646	282615	293035	332612	267362	326558	211734	355467	329956	318411	300756	329328	255238	400448	581693	405679	493417	401750	497426	348788	388298	394170	557444	366036	439894	151231	170217	187580	184154	184541
Q8BTZ7	2	2	157.11	4.14165e-08	1.47906	Condition 1	Condition 3	Mannose-1-phosphate guanyltransferase beta OS=Mus musculus GN=Gmppb PE=1 SV=1	376876	379004	361873	390545	360423	324938	219798	233640	248071	279679	262523	265547	257820	282342	234742	255336	237177	215730	239731	282072	249582	248586	251888	269858	299535	338777	279535	371285	282331	308165	163879	233640	206316	280335	225275	268136	137963	164006	132385	175870	134031
P24270	10	10	683.24	4.28711e-08	1.44963	Condition 3	Condition 1	Catalase OS=Mus musculus GN=Cat PE=1 SV=4	640303	622492	593413	673724	581889	638380	769514	750705	783854	792546	733575	764087	896246	1.09621e+06	942027	868842	765376	867711	639723	690907	645082	674492	663138	674559	508903	556420	458391	640499	455813	605426	573743	750705	651917	794406	629491	771537	479594	636761	531266	598442	432521
E9PVD1	1	1	18.44	4.29822e-08	1.69246	Condition 1	Condition 2	Coiled-coil domain-containing protein 62 OS=Mus musculus GN=Ccdc62 PE=3 SV=1	954235	905491	869787	863950	999370	888260	495219	578867	491491	652496	528208	492251	537727	479159	635540	542196	579848	492969	629417	469023	689670	569069	606382	554839	758411	809381	671881	821343	782839	842406	369231	578867	408765	654027	453263	497050	287745	278333	358419	373454	327677
Q3UX10	4	4	294.75	4.30739e-08	1.28445	Condition 1	Condition 2	Tubulin alpha chain-like 3 OS=Mus musculus GN=Tubal3 PE=2 SV=2	1.41569e+07	1.6034e+07	1.55669e+07	1.56893e+07	1.55228e+07	1.65507e+07	1.26258e+07	1.24505e+07	1.19047e+07	1.24445e+07	1.15277e+07	1.18568e+07	1.60299e+07	1.71688e+07	1.49753e+07	1.42371e+07	1.46218e+07	1.56361e+07	1.44323e+07	1.38925e+07	1.45216e+07	1.36254e+07	1.37823e+07	1.39191e+07	1.12517e+07	1.43321e+07	1.20249e+07	1.49155e+07	1.21596e+07	1.56964e+07	9.41365e+06	1.24505e+07	9.90093e+06	1.24737e+07	9.8921e+06	1.19724e+07	8.57784e+06	9.97298e+06	8.44548e+06	9.80627e+06	8.26292e+06
P41216	3	3	129.04	4.33409e-08	1.54517	Condition 4	Condition 1	Long-chain-fatty-acid--CoA ligase 1 OS=Mus musculus GN=Acsl1 PE=1 SV=2	129419	135114	141685	153431	114555	111682	129844	125588	140290	145372	130343	155885	160173	152686	160947	153312	154592	148567	206465	218526	186203	208400	206696	188041	102860	120773	109447	145865	89734.9	105917	96810.2	125588	116677	145713	111849	157405	85711	88692.2	90767.6	105599	87361.5
Q62442	2	2	187.35	4.4233e-08	1.36024	Condition 1	Condition 2	Vesicle-associated membrane protein 1 OS=Mus musculus GN=Vamp1 PE=1 SV=1	2.11502e+06	1.94452e+06	1.83305e+06	2.18594e+06	2.029e+06	1.97329e+06	1.56141e+06	1.52391e+06	1.40885e+06	1.49443e+06	1.36424e+06	1.52852e+06	2.0511e+06	2.16864e+06	1.81122e+06	1.81587e+06	1.85044e+06	1.88359e+06	1.73445e+06	1.83066e+06	1.6971e+06	1.76388e+06	1.6924e+06	1.73493e+06	1.68099e+06	1.73813e+06	1.41597e+06	2.07813e+06	1.58938e+06	1.87143e+06	1.16417e+06	1.52391e+06	1.17172e+06	1.49794e+06	1.17068e+06	1.54342e+06	1.09757e+06	1.25971e+06	1.02146e+06	1.25074e+06	1.0457e+06
Q8BH95	13	13	1349.24	4.42882e-08	1.29673	Condition 3	Condition 1	Enoyl-CoA hydratase, mitochondrial OS=Mus musculus GN=Echs1 PE=1 SV=1	7.59012e+06	8.81311e+06	8.24773e+06	7.8947e+06	8.05481e+06	7.63727e+06	9.96913e+06	9.04681e+06	9.03762e+06	9.42183e+06	9.48453e+06	9.72414e+06	1.04605e+07	1.17831e+07	1.03346e+07	9.71356e+06	1.04045e+07	9.85498e+06	1.04704e+07	1.01949e+07	1.04678e+07	1.0135e+07	1.00815e+07	9.89761e+06	6.03251e+06	7.87768e+06	6.37109e+06	7.50536e+06	6.30959e+06	7.24302e+06	7.43289e+06	9.04681e+06	7.51643e+06	9.44394e+06	8.1388e+06	9.81895e+06	5.59757e+06	6.84457e+06	5.82828e+06	6.69051e+06	5.87965e+06
P09405	34	31	3114.32	4.51139e-08	1.72778	Condition 2	Condition 1	Nucleolin OS=Mus musculus GN=Ncl PE=1 SV=2	5.03054e+06	4.97266e+06	5.91345e+06	4.86661e+06	5.15361e+06	4.88683e+06	7.80708e+06	8.74723e+06	1.20861e+07	8.02032e+06	7.90822e+06	8.68752e+06	7.72847e+06	7.11249e+06	7.02603e+06	6.85098e+06	7.6612e+06	6.9859e+06	7.64744e+06	7.39835e+06	8.56011e+06	7.96578e+06	8.55034e+06	8.65074e+06	3.99819e+06	4.44486e+06	4.56794e+06	4.6266e+06	4.03699e+06	4.63456e+06	5.82089e+06	8.74723e+06	1.00518e+07	8.03914e+06	6.78615e+06	8.77222e+06	4.13562e+06	4.13149e+06	3.9624e+06	4.71882e+06	4.32941e+06
Q5RJI5	11	10	983.27	4.6356e-08	1.28661	Condition 1	Condition 4	Serine/threonine-protein ki0se BRSK1 OS=Mus musculus GN=Brsk1 PE=1 SV=1	1.19801e+06	1.34427e+06	1.38843e+06	1.26114e+06	1.22563e+06	1.24859e+06	1.22652e+06	1.23267e+06	1.22551e+06	1.25568e+06	1.17751e+06	1.18632e+06	1.00812e+06	1.17871e+06	1.08061e+06	1.17161e+06	1.04493e+06	1.10853e+06	1.01979e+06	990306	998916	987663	1.02773e+06	933972	952162	1.20159e+06	1.07251e+06	1.19894e+06	960078	1.18414e+06	914481	1.23267e+06	1.01924e+06	1.25862e+06	1.01044e+06	1.19789e+06	539457	684689	609420	806982	590502
Q8R5L3	3	3	117.81	4.645e-08	1.28281	Condition 1	Condition 2	Vam6/Vps39-like protein OS=Mus musculus GN=Vps39 PE=1 SV=1	212821	215964	223015	236363	216833	222359	184662	164349	191208	168613	166651	159244	200186	193577	197183	184491	187793	195846	203152	203641	199132	210836	208535	207344	169147	193041	172272	224707	169852	210881	137682	164349	159024	169009	143005	160796	107122	112445	111203	127074	106124
Q9R0Q6	14	14	1070.57	4.67911e-08	1.28162	Condition 1	Condition 3	Actin-related protein 2/3 complex subunit 1A OS=Mus musculus GN=Arpc1a PE=1 SV=1	4.68743e+06	4.6097e+06	4.68141e+06	4.96491e+06	4.86525e+06	4.55175e+06	3.92015e+06	3.71631e+06	3.98061e+06	3.9311e+06	3.96381e+06	4.02261e+06	3.9249e+06	3.14033e+06	3.65397e+06	3.78983e+06	3.80769e+06	3.81192e+06	3.80818e+06	3.9267e+06	3.70711e+06	3.84649e+06	3.7286e+06	3.80704e+06	3.7255e+06	4.12042e+06	3.61624e+06	4.72005e+06	3.81111e+06	4.31679e+06	2.92283e+06	3.71631e+06	3.31061e+06	3.94032e+06	3.4014e+06	4.06183e+06	2.10027e+06	1.82415e+06	2.0607e+06	2.61036e+06	2.15176e+06
Q61171	9	9	871.24	4.7699e-08	1.3197	Condition 1	Condition 3	Peroxiredoxin-2 OS=Mus musculus GN=Prdx2 PE=1 SV=3	1.83998e+07	1.71143e+07	1.94353e+07	1.86261e+07	1.89436e+07	1.94057e+07	1.33103e+07	1.3808e+07	1.3656e+07	1.51469e+07	1.39678e+07	1.58068e+07	1.37743e+07	1.55877e+07	1.38072e+07	1.48509e+07	1.30561e+07	1.37349e+07	1.3376e+07	1.4239e+07	1.49302e+07	1.44076e+07	1.4924e+07	1.34361e+07	1.46238e+07	1.52978e+07	1.50132e+07	1.77075e+07	1.48391e+07	1.8404e+07	9.92404e+06	1.3808e+07	1.13574e+07	1.51824e+07	1.1986e+07	1.59609e+07	7.37083e+06	9.05457e+06	7.78672e+06	1.0229e+07	7.37813e+06
Q02105	4	4	299.6	4.86992e-08	1.35844	Condition 3	Condition 2	Complement C1q subcomponent subunit C OS=Mus musculus GN=C1qc PE=1 SV=2	1.05467e+06	1.04533e+06	993052	979236	933207	960649	860733	860658	907061	867657	912615	907165	1.19401e+06	1.21888e+06	1.11332e+06	1.26661e+06	1.21508e+06	1.21344e+06	1.06211e+06	1.14021e+06	959526	1.11678e+06	934592	1.06026e+06	838233	934381	767099	930944	731011	911060	641754	860658	754387	869693	783127	916010	638932	708018	627868	872416	686652
P07901	53	49	5076.36	4.88895e-08	1.26298	Condition 1	Condition 2	Heat shock protein HSP 90-alpha OS=Mus musculus GN=Hsp90aa1 PE=1 SV=4	2.41999e+07	2.35484e+07	2.45802e+07	2.38154e+07	2.27098e+07	2.38981e+07	1.84814e+07	1.95527e+07	1.77131e+07	1.92069e+07	1.87165e+07	1.93571e+07	1.94472e+07	2.18152e+07	1.83471e+07	2.00387e+07	1.92251e+07	1.95367e+07	1.87153e+07	2.11268e+07	1.90519e+07	2.06649e+07	1.978e+07	1.9484e+07	1.92337e+07	2.1049e+07	1.89874e+07	2.26409e+07	1.77894e+07	2.26645e+07	1.37796e+07	1.95527e+07	1.47317e+07	1.92519e+07	1.60609e+07	1.95458e+07	1.04065e+07	1.2672e+07	1.03471e+07	1.38022e+07	1.08643e+07
Q9EST5	6	6	241.69	4.9709e-08	2.0926	Condition 2	Condition 4	Acidic leucine-rich nuclear phosphoprotein 32 family member B OS=Mus musculus GN=Anp32b PE=1 SV=1	363907	330203	490023	469887	653437	422947	448725	471359	516072	450102	581925	587131	208512	287986	235862	278890	251395	225024	221786	264366	223226	224514	303882	222284	289227	295155	378526	446713	511859	401114	334565	471359	429208	451159	499357	592856	111578	167284	133017	192094	142065
Q9WV98	4	4	298.05	5.09158e-08	1.46662	Condition 4	Condition 1	Mitochondrial import inner membrane translocase subunit Tim9 OS=Mus musculus GN=Timm9 PE=1 SV=1	642373	597775	649271	569843	558013	615611	727942	781660	773869	723966	882156	819585	906397	834647	849419	792291	888124	749919	964230	798019	936690	902626	908918	817579	510548	534326	501540	541741	437110	583832	542747	781660	643613	725665	756990	827576	485026	484828	479039	545715	501887
P63040	3	3	331.34	5.15549e-08	1.22464	Condition 1	Condition 2	Complexin-1 OS=Mus musculus GN=Cplx1 PE=1 SV=1	7.43722e+06	7.90778e+06	7.52568e+06	7.40989e+06	7.19573e+06	7.02178e+06	5.55763e+06	6.09211e+06	6.08848e+06	6.02187e+06	6.20031e+06	6.37536e+06	7.22947e+06	7.61208e+06	7.49664e+06	7.13394e+06	7.38482e+06	7.14578e+06	6.7248e+06	6.56333e+06	7.02065e+06	6.27382e+06	6.75334e+06	6.24468e+06	5.91099e+06	7.06844e+06	5.81334e+06	7.04446e+06	5.63665e+06	6.65931e+06	4.14372e+06	6.09211e+06	5.06368e+06	6.036e+06	5.32056e+06	6.43752e+06	3.86859e+06	4.42169e+06	4.22781e+06	4.91372e+06	4.17323e+06
P18608	3	3	343.38	5.17073e-08	1.74326	Condition 4	Condition 1	Non-histone chromosomal protein HMG-14 OS=Mus musculus GN=Hmgn1 PE=1 SV=2	378817	454468	427498	366129	379889	396562	677371	675510	566914	628900	645336	661891	546892	735103	698833	669642	488627	650405	709708	764942	658467	763883	599682	693008	301078	406231	330228	348073	297580	376091	505041	675510	471492	630376	553771	668344	292650	427005	394114	461236	276128
Q05BC3	5	5	293.97	5.47538e-08	1.42865	Condition 2	Condition 4	Echinoderm microtubule-associated protein-like 1 OS=Mus musculus GN=Eml1 PE=1 SV=1	326976	306794	352611	315600	313807	353271	307925	344200	302667	343644	334763	344736	245729	283473	250637	293611	222604	233801	240325	234945	251620	219612	207776	230195	259875	274230	272380	300035	245815	335035	229586	344200	251722	344451	287265	348097	131493	164663	141349	202234	125795
P58871	14	14	790.24	5.5199e-08	1.37502	Condition 2	Condition 4	182 kDa tankyrase-1-binding protein OS=Mus musculus GN=Tnks1bp1 PE=1 SV=2	935854	927238	928203	883450	929551	856924	915754	843817	966530	931727	989942	1.05125e+06	727896	819334	790512	638115	755295	764687	718126	733643	666276	657858	660248	708515	743802	828820	717006	839881	728148	812688	682778	843817	803846	933914	849482	1.0615e+06	389508	475933	445817	439521	426824
P26443	39	38	3731.84	5.59609e-08	1.30965	Condition 4	Condition 1	Glutamate dehydroge0se 1, mitochondrial OS=Mus musculus GN=Glud1 PE=1 SV=1	2.14688e+07	2.27213e+07	2.3369e+07	2.38172e+07	2.24454e+07	2.27021e+07	2.34051e+07	2.29667e+07	2.37462e+07	2.48113e+07	2.1115e+07	2.37028e+07	2.73271e+07	3.28115e+07	2.58713e+07	3.04713e+07	2.7647e+07	2.67981e+07	2.88267e+07	3.05818e+07	2.83252e+07	2.96086e+07	3.03074e+07	3.11492e+07	1.7063e+07	2.03096e+07	1.80518e+07	2.26426e+07	1.75822e+07	2.15302e+07	1.74506e+07	2.29667e+07	1.97493e+07	2.48695e+07	1.81191e+07	2.39339e+07	1.46231e+07	1.90595e+07	1.45904e+07	2.0988e+07	1.56236e+07
Q8VE80	2	2	93.51	5.71251e-08	1.80654	Condition 4	Condition 1	THO complex subunit 3 OS=Mus musculus GN=Thoc3 PE=2 SV=1	66064.4	77650.3	71936.3	70568.1	69938.5	68313.8	87189	129543	119801	116127	109574	136560	102256	154924	113923	133327	118786	116813	125631	113403	142348	125414	133949	126080	52507	69408.5	55568.4	67087.9	54785.1	64787.3	65007.3	129543	99636.6	116399	94027.1	137892	54718.7	89991.9	64247.9	91832.9	67126.8
Q922J6	1	1	56.57	5.76111e-08	1.71227	Condition 3	Condition 1	Tetraspanin-2 OS=Mus musculus GN=Tspan2 PE=1 SV=1	332154	367704	270555	350729	260424	378967	328083	294627	343060	377030	320318	332056	410739	666047	556410	630761	543072	549942	517606	569505	581756	553817	522472	505415	263991	328676	208995	333432	203999	359404	244615	294627	285317	377915	274869	335293	219792	386892	313793	434456	306895
Q64478	20	20	1759.84	5.77266e-08	3.74378	Condition 4	Condition 1	Histone H2B type 1-H OS=Mus musculus GN=Hist1h2bh PE=1 SV=3	1.19062e+08	1.21927e+08	1.25863e+08	1.33877e+08	1.22498e+08	1.27861e+08	4.34763e+08	4.36096e+08	4.15739e+08	4.32271e+08	4.26721e+08	4.44411e+08	5.24427e+08	1.30439e+08	4.35171e+08	4.4447e+08	4.52216e+08	4.56537e+08	4.82452e+08	4.76929e+08	4.61066e+08	4.79185e+08	4.38446e+08	4.73828e+08	9.4629e+07	1.08986e+08	9.72248e+07	1.27275e+08	9.59564e+07	1.21261e+08	3.24155e+08	4.36096e+08	3.45762e+08	4.33286e+08	3.66175e+08	4.48744e+08	2.80629e+08	7.57693e+07	2.45419e+08	3.06142e+08	2.55551e+08
Q99KN9	3	3	213.36	5.86237e-08	1.60238	Condition 1	Condition 3	Clathrin interactor 1 OS=Mus musculus GN=Clint1 PE=1 SV=2	431489	424935	484757	446787	400098	464005	302381	296036	263393	291495	277064	346583	280772	304539	239389	271552	271405	287425	277835	373768	343306	335136	293790	319164	342941	379832	374459	424753	313410	440052	225453	296036	219059	292179	237753	349962	150245	176900	135006	187040	153373
P41778	3	3	287.26	5.87502e-08	1.85967	Condition 4	Condition 1	Pre-B-cell leukemia transcription factor 1 OS=Mus musculus GN=Pbx1 PE=1 SV=2	205700	230024	216091	194361	289302	220737	337478	344697	274815	267589	296187	345464	348413	309512	395753	358333	313419	337525	424590	365139	455383	468987	402307	405713	163487	205609	166923	184776	226620	209342	251620	344697	228559	268217	254162	348833	186441	179789	223189	246813	177116
P68369	22	22	2381.63	5.91948e-08	1.25113	Condition 1	Condition 2	Tubulin alpha-1A chain OS=Mus musculus GN=Tuba1a PE=1 SV=1	3.5931e+08	3.49976e+08	3.59823e+08	3.37074e+08	3.4769e+08	3.4158e+08	2.88453e+08	2.65305e+08	2.83455e+08	2.78866e+08	2.70008e+08	2.88762e+08	3.13528e+08	3.16374e+08	2.8831e+08	2.87906e+08	2.8549e+08	2.84545e+08	3.13218e+08	3.1391e+08	3.05303e+08	3.0513e+08	3.45684e+08	3.0547e+08	2.85574e+08	3.1283e+08	2.77951e+08	3.2045e+08	2.72357e+08	3.23947e+08	2.15068e+08	2.65305e+08	2.35744e+08	2.79521e+08	2.31698e+08	2.91578e+08	1.67773e+08	1.83774e+08	1.62596e+08	1.98304e+08	1.61333e+08
Q91XV3	10	10	1226.83	6.04561e-08	1.45406	Condition 1	Condition 2	Brain acid soluble protein 1 OS=Mus musculus GN=Basp1 PE=1 SV=3	7.80482e+06	8.36985e+06	7.78662e+06	8.18086e+06	7.84916e+06	7.88375e+06	5.85956e+06	5.83346e+06	5.56441e+06	5.31043e+06	5.2924e+06	5.06478e+06	5.96256e+06	7.14661e+06	6.27573e+06	5.36333e+06	6.49411e+06	5.46917e+06	6.45648e+06	6.17591e+06	6.88185e+06	6.049e+06	6.17344e+06	6.37946e+06	6.20315e+06	7.48147e+06	6.0149e+06	7.77741e+06	6.1485e+06	7.47678e+06	4.36883e+06	5.83346e+06	4.62782e+06	5.3229e+06	4.54148e+06	5.11416e+06	3.19066e+06	4.15131e+06	3.53926e+06	3.69416e+06	3.66988e+06
Q8BG81	10	10	699.58	6.0647e-08	1.38216	Condition 3	Condition 1	Polymerase delta-interacting protein 3 OS=Mus musculus GN=Poldip3 PE=1 SV=1	895157	992704	871947	891604	862538	866637	1.07269e+06	1.10324e+06	1.03308e+06	1.13102e+06	1.09088e+06	1.046e+06	1.30729e+06	1.27372e+06	1.19527e+06	1.22473e+06	1.29624e+06	1.13962e+06	1.21864e+06	991776	1.14702e+06	1.20133e+06	1.04472e+06	1.15578e+06	711457	887338	673550	847633	675654	821900	799789	1.10324e+06	859196	1.13367e+06	936097	1.0562e+06	699549	739874	674083	843570	732516
Q80W93	1	1	32.21	6.12771e-08	1.89175	Condition 1	Condition 4	Hydrocephalus-inducing protein OS=Mus musculus GN=Hydin PE=1 SV=2	50773.3	65121.1	62100	57682.1	52265.9	64368.4	51489	40803	45242.4	45473	36741.3	50099.3	33264	40835.5	36471	33801.9	28216.3	31389	29659.6	34502.2	36831.6	29066.9	30860.1	25315.4	40353.8	58209.1	47970.2	54837.5	40941.6	61045.6	38389.7	40803	37627.3	45579.7	31528.2	50587.8	17800	23720.5	20568.2	23282.1	15945.3
Q9QZ23	3	3	186.63	6.13622e-08	1.34848	Condition 4	Condition 1	NFU1 iron-sulfur cluster scaffold homolog, mitochondrial OS=Mus musculus GN=Nfu1 PE=1 SV=2	397511	381701	395221	382578	379340	382750	444203	424367	421092	446337	392811	448294	518411	557935	452902	483577	464809	438429	517584	510967	548404	544448	505640	500215	315936	341187	305295	363711	297149	362992	331194	424367	350214	447385	337076	452665	277409	324092	255419	333078	262668
Q8R2T8	2	1	59.29	6.16435e-08	1.56219	Condition 3	Condition 1	General transcription factor 3C polypeptide 5 OS=Mus musculus GN=Gtf3c5 PE=2 SV=2	68876.3	58420.8	66274.8	66107.7	73589.9	62310	80921.6	92491.6	92818.4	95078.8	100210	89980.1	98813.7	119874	97603.6	90935.5	107009	103736	97829.4	113956	106570	100098	95413.2	85063.9	54741.8	52220	51195.1	62847.5	57645.4	59093.5	60334.4	92491.6	77195.4	95302	85991.4	90857.4	52876.7	69631.9	55044.6	62634.6	60471.6
Q5PR73	5	5	369.05	6.33771e-08	1.47867	Condition 1	Condition 3	GTP-binding protein Di-Ras2 OS=Mus musculus GN=Diras2 PE=1 SV=1	643715	716672	648742	623957	658363	698333	528172	531241	571884	540525	560286	645794	497406	429534	425405	440886	412843	492156	470112	546724	574071	515322	496766	511723	511614	640603	501131	593185	515717	662284	393800	531241	475626	541794	480789	652090	266169	249507	239912	303673	233301
Q921M4	3	3	170.58	6.35544e-08	1.61735	Condition 2	Condition 1	Golgin subfamily A member 2 OS=Mus musculus GN=Golga2 PE=1 SV=3	151542	157601	211775	158285	149984	159477	285589	251327	250141	255741	282614	273602	231130	213805	232652	242226	202873	240978	230566	266877	260419	244850	236595	211395	120443	140873	163589	150479	117487	151245	212933	251327	208038	256341	242515	276270	123681	124195	131207	166841	114645
P08553	3	3	153.63	6.38556e-08	1.84605	Condition 3	Condition 4	Neurofilament medium polypeptide OS=Mus musculus GN=Nefm PE=1 SV=4	385405	339902	339928	368312	282874	341044	286828	307786	261169	334497	346213	329952	487930	477890	462957	431366	411824	467030	255689	276648	183383	256861	256841	254284	306314	303824	262583	350148	221585	323439	213856	307786	217209	335282	297090	333169	261098	277596	261090	297116	232725
Q6PAJ1	5	5	306.66	6.41498e-08	1.4269	Condition 1	Condition 3	Breakpoint cluster region protein OS=Mus musculus GN=Bcr PE=1 SV=3	768585	908013	797419	870839	837656	827449	617695	642825	646676	711470	597644	658077	540782	706203	559201	568991	564586	571320	621672	668602	607282	644359	609923	616664	610860	811636	615980	827892	656163	784735	460548	642825	537829	713140	512846	664493	289380	410218	315367	391910	319053
P09602	2	2	243.53	6.44252e-08	1.61387	Condition 3	Condition 1	Non-histone chromosomal protein HMG-17 OS=Mus musculus GN=Hmgn2 PE=1 SV=2	5.56973e+06	6.34534e+06	5.57407e+06	5.04903e+06	5.24562e+06	5.13907e+06	7.26004e+06	7.75301e+06	6.93947e+06	8.71798e+06	8.42268e+06	8.70399e+06	7.95496e+06	9.91678e+06	8.25084e+06	9.09321e+06	8.67084e+06	9.24656e+06	7.65282e+06	9.4117e+06	7.23579e+06	8.70172e+06	7.68552e+06	7.67583e+06	4.42673e+06	5.67184e+06	4.30578e+06	4.80003e+06	4.10906e+06	4.87379e+06	5.41302e+06	7.75301e+06	5.77144e+06	8.73844e+06	7.22761e+06	8.78885e+06	4.25682e+06	5.76044e+06	4.65315e+06	6.26322e+06	4.89997e+06
Q9D6E4	5	5	299.24	6.51217e-08	1.32008	Condition 1	Condition 3	Tetratricopeptide repeat protein 9B OS=Mus musculus GN=Ttc9b PE=1 SV=1	421611	461760	450588	442468	425485	448244	413555	385211	417013	377367	396865	421003	335169	376513	337137	295487	314903	348357	333315	333464	307877	352406	366511	327375	335090	412749	348065	420647	333297	425105	308343	385211	346823	378253	340555	425108	179354	218708	190132	203526	177955
P62908	18	17	1046.58	6.54804e-08	1.4419	Condition 1	Condition 2	40S ribosomal protein S3 OS=Mus musculus GN=Rps3 PE=1 SV=1	4.63145e+06	5.27807e+06	4.684e+06	5.02228e+06	4.9463e+06	5.07552e+06	3.51673e+06	3.56186e+06	3.36908e+06	3.62967e+06	3.15724e+06	3.32005e+06	3.77006e+06	4.78698e+06	3.43427e+06	3.84873e+06	3.86711e+06	3.689e+06	3.86127e+06	3.73907e+06	3.69261e+06	3.66055e+06	3.60172e+06	3.68131e+06	3.68101e+06	4.71785e+06	3.61823e+06	4.7746e+06	3.87459e+06	4.81351e+06	2.62204e+06	3.56186e+06	2.802e+06	3.63819e+06	2.70927e+06	3.35242e+06	2.01742e+06	2.78065e+06	1.93679e+06	2.65093e+06	2.18534e+06
Q80VP0	1	1	62.44	6.71167e-08	2.78109	Condition 1	Condition 2	Tectonin beta-propeller repeat-containing protein 1 OS=Mus musculus GN=Tecpr1 PE=1 SV=1	399474	343090	309594	419658	306922	333715	134977	150737	124173	157819	122140	69732.8	280589	257608	260634	238323	234333	246312	216938	290673	282689	206538	312763	209091	317496	306674	239151	398962	240422	316488	100638	150737	103272	158190	104810	70412.7	150147	149639	146987	164153	132424
Q8BK64	4	4	204.87	6.84739e-08	1.43599	Condition 1	Condition 3	Activator of 90 kDa heat shock protein ATPase homolog 1 OS=Mus musculus GN=Ahsa1 PE=1 SV=2	734419	688687	825093	769301	883656	696382	543641	491354	558134	523282	535536	568092	572789	476001	519034	518292	570930	544598	569864	520570	545541	533765	631906	547470	583705	615590	637357	731362	692197	660434	405334	491354	464190	524510	459551	573631	306508	276498	292714	356989	322638
Q9CR00	3	3	180.32	6.84784e-08	1.73106	Condition 1	Condition 4	26S proteasome non-ATPase regulatory subunit 9 OS=Mus musculus GN=Psmd9 PE=1 SV=1	307204	337183	329008	363417	310706	365555	199665	205900	206307	201825	237606	254760	213573	220904	186203	199218	200231	234825	160679	214439	158615	220216	191318	217647	244161	301394	254147	345494	243386	346684	148868	205900	171582	202298	203892	257244	114286	128318	105011	137218	113152
Q9QYS9	9	8	612.06	6.95422e-08	1.25144	Condition 3	Condition 1	Protein quaking OS=Mus musculus GN=Qki PE=1 SV=1	2.0288e+06	2.00113e+06	1.96758e+06	1.97679e+06	2.09132e+06	1.91219e+06	2.43031e+06	2.69327e+06	2.3763e+06	2.42722e+06	2.50771e+06	2.36767e+06	2.48978e+06	2.70017e+06	2.45598e+06	2.30869e+06	2.39564e+06	2.63923e+06	2.42074e+06	2.53773e+06	2.44844e+06	2.48165e+06	2.4802e+06	2.25883e+06	1.61246e+06	1.78873e+06	1.51989e+06	1.8793e+06	1.6382e+06	1.81348e+06	1.81202e+06	2.69327e+06	1.97633e+06	2.43291e+06	2.1519e+06	2.39075e+06	1.33232e+06	1.56847e+06	1.38508e+06	1.59018e+06	1.3538e+06
P46664	9	9	463.33	7.01005e-08	1.33701	Condition 1	Condition 2	Adenylosucci0te synthetase isozyme 2 OS=Mus musculus GN=Adss PE=1 SV=2	486481	475776	496617	456223	489309	446783	387227	357604	354264	334890	354641	343876	407586	392116	380498	386573	381166	392728	368601	381313	409781	359412	434928	353705	386648	425277	383620	433723	383292	423719	288713	357604	294635	335676	304322	347229	218105	227772	214586	266264	215401
Q9D172	12	11	1154.83	7.10806e-08	1.24706	Condition 4	Condition 2	ES1 protein homolog, mitochondrial OS=Mus musculus GN=D10Jhu81e PE=1 SV=1	7.10506e+06	7.23061e+06	6.95922e+06	6.9123e+06	7.17151e+06	7.25104e+06	6.95754e+06	7.07331e+06	6.76497e+06	7.75225e+06	6.63795e+06	6.79693e+06	7.86799e+06	8.57452e+06	7.24254e+06	7.96071e+06	7.37146e+06	7.611e+06	8.66222e+06	8.62089e+06	8.69549e+06	8.5453e+06	8.73807e+06	9.09327e+06	5.64699e+06	6.46315e+06	5.37576e+06	6.57141e+06	5.61768e+06	6.87673e+06	5.18748e+06	7.07331e+06	5.6263e+06	7.77044e+06	5.69612e+06	6.8632e+06	4.21028e+06	4.98075e+06	4.08451e+06	5.48318e+06	4.16568e+06
Q99L13	14	14	1128.78	7.10828e-08	1.32802	Condition 3	Condition 1	3-hydroxyisobutyrate dehydroge0se, mitochondrial OS=Mus musculus GN=Hibadh PE=1 SV=1	3.52475e+06	3.50039e+06	3.58413e+06	3.57419e+06	3.41301e+06	3.34392e+06	4.24212e+06	4.6139e+06	4.15004e+06	4.21089e+06	4.33534e+06	4.31604e+06	4.5481e+06	5.57948e+06	4.25768e+06	4.48632e+06	4.49771e+06	4.44004e+06	4.39484e+06	4.83446e+06	4.40149e+06	4.55128e+06	4.65913e+06	4.56484e+06	2.80142e+06	3.12886e+06	2.76862e+06	3.39793e+06	2.67352e+06	3.1713e+06	3.16289e+06	4.6139e+06	3.45151e+06	4.22078e+06	3.72022e+06	4.35812e+06	2.43375e+06	3.241e+06	2.40116e+06	3.09009e+06	2.5417e+06
Q8R0S4	3	2	144.64	7.12376e-08	1.94053	Condition 2	Condition 1	Voltage-dependent L-type calcium channel subunit beta-4 OS=Mus musculus GN=Cacnb4 PE=1 SV=2	133573	134484	147466	150558	142766	157036	326055	272833	236087	253561	266185	325551	189762	219022	187399	178821	165536	176102	148572	164844	136469	147547	224238	157507	106162	120210	113913	143133	111833	148929	243104	272833	196350	254156	228417	328725	101545	127225	105685	123169	93545.7
Q8K2Z4	1	1	24.24	7.16932e-08	2.2931	Condition 1	Condition 4	Condensin complex subunit 1 OS=Mus musculus GN=Ncapd2 PE=1 SV=2	123985	108856	103189	113629	110522	112920	56883.3	51211.2	64770.6	51543.7	76866.1	55463.7	58098.5	51919.5	35080.6	59243.5	59058.1	67596.2	47274.7	43544.8	52882.5	55108.7	57055.9	37667.6	98541.7	97302.1	79710	108025	86575.7	107091	42411.7	51211.2	53868.5	51664.7	65959.9	56004.5	31089.3	30158.9	19784.1	40805.8	33374.3
Q91WC0	3	3	160.79	7.24267e-08	1.44849	Condition 2	Condition 4	Histone-lysine N-methyltransferase setd3 OS=Mus musculus GN=Setd3 PE=1 SV=1	471435	515785	552085	537613	548728	534467	491264	549646	549716	556176	555437	558946	437644	430847	480977	402645	426247	450303	408496	416243	392119	333189	386751	314644	374689	461040	426467	511100	429836	506878	366282	549646	457189	557481	476627	564395	234190	250270	271252	277334	240876
Q9CWS0	11	11	935.98	7.28502e-08	1.27281	Condition 1	Condition 3	N(G),N(G)-dimethylarginine dimethylaminohydrolase 1 OS=Mus musculus GN=Ddah1 PE=1 SV=3	7.11132e+06	6.46346e+06	6.87943e+06	6.59787e+06	6.83085e+06	6.88715e+06	5.69017e+06	6.152e+06	5.77562e+06	5.877e+06	5.89804e+06	5.57657e+06	5.6377e+06	5.38041e+06	5.00119e+06	5.0134e+06	5.62652e+06	5.37221e+06	5.97556e+06	6.30015e+06	5.9693e+06	5.61099e+06	6.26286e+06	5.67872e+06	5.65197e+06	5.77742e+06	5.31413e+06	6.27249e+06	5.35083e+06	6.53163e+06	4.24254e+06	6.152e+06	4.80348e+06	5.8908e+06	5.06118e+06	5.63094e+06	3.01682e+06	3.12536e+06	2.82047e+06	3.45313e+06	3.1796e+06
Q9QZD9	10	10	569.28	7.34161e-08	1.53572	Condition 1	Condition 3	Eukaryotic translation initiation factor 3 subunit I OS=Mus musculus GN=Eif3i PE=1 SV=1	1.30415e+06	1.49581e+06	1.20715e+06	1.27314e+06	1.401e+06	1.44096e+06	1.38083e+06	1.23274e+06	1.30208e+06	1.44218e+06	1.26453e+06	1.38556e+06	832547	835609	944610	1.09524e+06	762426	818414	1.06743e+06	1.22661e+06	1.1265e+06	1.05504e+06	1.0675e+06	1.14245e+06	1.03652e+06	1.33705e+06	932482	1.21035e+06	1.09745e+06	1.36658e+06	1.02954e+06	1.23274e+06	1.08292e+06	1.44556e+06	1.08511e+06	1.39906e+06	445508	485387	532723	754382	430854
Q9JK53	1	1	62.02	7.35077e-08	2.51758	Condition 3	Condition 1	Prolargin OS=Mus musculus GN=Prelp PE=1 SV=2	70502.8	62907.6	87903.5	98922.7	66369.8	98043.6	133922	112714	106593	85347.5	111218	137854	202365	207270	165035	223577	193335	228565	115302	106119	119860	122856	163879	145903	56034.5	56230.5	67902.5	94044.2	51989.6	92982.4	99850.8	112714	88651.1	85547.8	95437.6	139198	108288	120399	93073.5	153995	109255
Q9QXS6	21	20	1607.85	7.47043e-08	1.29279	Condition 1	Condition 2	Drebrin OS=Mus musculus GN=Dbn1 PE=1 SV=4	4.88471e+06	5.42619e+06	5.30202e+06	5.12452e+06	4.66599e+06	4.91618e+06	3.88505e+06	3.9474e+06	3.85917e+06	3.83374e+06	3.91312e+06	4.01437e+06	3.96758e+06	4.47839e+06	3.90533e+06	4.32412e+06	4.13832e+06	4.35839e+06	4.13859e+06	4.33156e+06	4.0873e+06	4.04151e+06	3.74078e+06	4.31709e+06	3.88229e+06	4.85025e+06	4.09563e+06	4.87179e+06	3.65503e+06	4.6624e+06	2.89666e+06	3.9474e+06	3.2096e+06	3.84274e+06	3.3579e+06	4.05351e+06	2.12311e+06	2.6014e+06	2.20245e+06	2.97837e+06	2.3386e+06
Q3TWW8	1	1	48.47	7.55155e-08	1.94067	Condition 1	Condition 4	Serine/arginine-rich splicing factor 6 OS=Mus musculus GN=Srsf6 PE=1 SV=1	152377	218609	149459	194917	156845	142606	149832	139888	158495	159147	138902	140604	116515	160967	147460	142761	143921	125016	84794.3	85583.7	97094.4	76932.9	102419	76095.2	121107	195406	115452	185304	122862	135245	111714	139888	131817	159521	119193	141975	62349.1	93502.3	83161.7	98331	81331.3
P19253	2	2	61.71	7.65753e-08	47.6563	Condition 1	Condition 2	60S ribosomal protein L13a OS=Mus musculus GN=Rpl13a PE=1 SV=4	138215	151403	145549	140899	106172	155680	5446.86	2821.24	2940.57	2828.97	964.841	2580.03	1496.57	892.822	31111.4	5388.69	5667.24	754.016	2704.56	4364.32	5947.98	2515.56	7931.96	1522.58	109851	135333	112432	133950	83167.6	147643	4061.13	2821.24	2445.62	2835.61	827.943	2605.18	800.837	518.621	17545.6	3711.62	3202.61
Q69ZK5	1	1	27.77	7.74917e-08	2.33856	Condition 3	Condition 1	Kelch-like protein 14 OS=Mus musculus GN=Klhl14 PE=1 SV=2	280509	224477	199625	202940	233138	174040	290350	309724	279558	314948	359594	270438	592902	478405	614059	401043	529228	458936	468025	322859	453258	348688	357724	302725	222944	200651	154203	192931	182624	165055	216482	309724	232504	315687	308572	273074	317270	277895	346305	276231	299071
Q9QZE5	8	8	443.21	7.82948e-08	1.22486	Condition 1	Condition 2	Coatomer subunit gamma-1 OS=Mus musculus GN=Copg1 PE=1 SV=1	884968	873025	851116	918024	830674	867215	767270	689751	708348	751457	666395	682580	758229	767242	745156	754771	770025	795765	750468	737130	759611	787419	749327	728091	703359	780361	657459	872750	650694	822448	572069	689751	589120	753221	571843	689235	405739	445674	420239	519872	435148
Q8BWT1	25	24	2218.07	7.84538e-08	1.41745	Condition 4	Condition 1	3-ketoacyl-CoA thiolase, mitochondrial OS=Mus musculus GN=Acaa2 PE=1 SV=3	4.02438e+06	3.88599e+06	4.49288e+06	3.90419e+06	4.1284e+06	3.94913e+06	4.36729e+06	3.86947e+06	4.21079e+06	4.19693e+06	3.82965e+06	4.01135e+06	5.0546e+06	4.20841e+06	4.82828e+06	4.51592e+06	5.60735e+06	4.67017e+06	5.52302e+06	5.92093e+06	6.24078e+06	5.99303e+06	5.77855e+06	5.10816e+06	3.19852e+06	3.47353e+06	3.4706e+06	3.71165e+06	3.23391e+06	3.74527e+06	3.25621e+06	3.86947e+06	3.50204e+06	4.20678e+06	3.28628e+06	4.05046e+06	2.70479e+06	2.44457e+06	2.72296e+06	3.11048e+06	3.16877e+06
P08046	1	1	39.93	7.91943e-08	1.71974	Condition 1	Condition 4	Early growth response protein 1 OS=Mus musculus GN=Egr1 PE=1 SV=2	146558	192710	178400	158091	159589	180355	118265	120042	123270	105915	102142	112502	102887	117907	123728	106112	117609	101781	101409	117627	90831.8	99151.5	78187	103407	116482	172256	137808	150294	125011	171045	88177.2	120042	102522	106163	87649	113599	55056.2	68489.9	69777.6	73087.8	66461.7
Q924A2	1	1	26.28	7.92253e-08	1.6724	Condition 1	Condition 4	Protein capicua homolog OS=Mus musculus GN=Cic PE=1 SV=2	263127	290305	280383	300417	249355	241935	222471	227639	218526	302160	238301	267261	187977	174358	164378	132044	170285	153927	177463	139571	178355	136108	180379	160094	209129	259492	216587	285602	195328	229446	165873	227639	181744	302869	204489	269867	100589	101281	92702.7	90949.4	96229.7
Q62417	6	6	352.94	8.00782e-08	1.64114	Condition 3	Condition 2	Sorbin and SH3 domain-containing protein 1 OS=Mus musculus GN=Sorbs1 PE=1 SV=2	409814	451491	376552	363769	351972	415715	404525	317669	352711	389695	335505	381766	558245	758817	609225	557302	536519	560649	480175	477356	453456	514597	528439	503649	325714	403569	290874	345829	275711	394255	301610	317669	293344	390610	287901	385488	298725	440780	343579	383859	303192
Q91V12	10	10	928.48	8.11168e-08	1.29535	Condition 1	Condition 2	Cytosolic acyl coenzyme A thioester hydrolase OS=Mus musculus GN=Acot7 PE=1 SV=2	5.58491e+06	5.89383e+06	5.03706e+06	5.25934e+06	4.92701e+06	5.39869e+06	4.22273e+06	4.13704e+06	4.07078e+06	4.2262e+06	4.00757e+06	4.11731e+06	4.44086e+06	4.9908e+06	4.4933e+06	4.2308e+06	4.17268e+06	4.34251e+06	4.50147e+06	4.34352e+06	4.43019e+06	4.34974e+06	4.47738e+06	4.44097e+06	4.4388e+06	5.26825e+06	3.89096e+06	4.99997e+06	3.85949e+06	5.12e+06	3.14843e+06	4.13704e+06	3.3856e+06	4.23612e+06	3.43895e+06	4.15746e+06	2.37637e+06	2.89905e+06	2.53404e+06	2.91409e+06	2.35802e+06
Q8BK67	9	9	452.05	8.127e-08	1.26913	Condition 2	Condition 1	Protein RCC2 OS=Mus musculus GN=Rcc2 PE=1 SV=1	648961	682813	640472	649046	626487	626285	794410	804308	820756	856737	817057	823412	777674	833560	684732	752826	781572	815030	679467	690660	594266	690835	634698	684034	515784	610338	494744	617038	490748	593955	592305	804308	682609	858748	701127	831440	416144	484197	386162	518532	441674
Q9CZT8	3	2	288.48	8.14044e-08	3.00556	Condition 4	Condition 3	Ras-related protein Rab-3B OS=Mus musculus GN=Rab3b PE=1 SV=1	640524	709045	802265	745299	672057	681548	531726	437288	428638	477360	425349	516923	241202	203255	487127	473119	224731	195589	821454	966111	957499	994330	844407	901406	509078	633786	619723	708544	526444	646365	396450	437288	356491	478481	364998	521963	129070	118066	274721	325875	126997
Q91YT0	8	7	431.13	8.2026e-08	2.79915	Condition 4	Condition 1	0DH dehydroge0se [ubiquinone] flavoprotein 1, mitochondrial OS=Mus musculus GN=Ndufv1 PE=1 SV=1	332767	287557	374873	328193	363002	289655	525510	570234	638049	624506	541838	572971	679607	320415	675107	625386	835580	607387	864660	901943	1.06149e+06	1.00017e+06	893633	809359	264478	257036	289577	312007	284351	274702	391815	570234	530654	625972	464958	578558	363668	186122	380734	430754	472194
P97427	30	30	2678.99	8.23305e-08	1.50463	Condition 1	Condition 3	Dihydropyrimidi0se-related protein 1 OS=Mus musculus GN=Crmp1 PE=1 SV=1	1.72561e+07	1.68462e+07	1.90669e+07	1.7588e+07	1.83588e+07	1.70384e+07	1.38287e+07	1.22819e+07	1.34374e+07	1.28614e+07	1.29009e+07	1.36407e+07	1.26814e+07	9.06132e+06	1.23468e+07	1.14964e+07	1.26959e+07	1.22699e+07	1.41865e+07	1.41119e+07	1.43833e+07	1.35502e+07	1.53356e+07	1.37274e+07	1.37149e+07	1.50582e+07	1.47285e+07	1.67206e+07	1.4381e+07	1.61589e+07	1.03106e+07	1.22819e+07	1.11757e+07	1.28916e+07	1.10704e+07	1.37737e+07	6.78601e+06	5.26352e+06	6.96309e+06	7.91847e+06	7.17459e+06
Q9CZL5	2	2	65.24	8.65858e-08	1.53467	Condition 4	Condition 1	Pterin-4-alpha-carbinolamine dehydratase 2 OS=Mus musculus GN=Pcbd2 PE=1 SV=2	245262	223640	214344	219059	229877	205609	279548	280887	267352	227579	294126	240685	368997	307663	331008	307500	364459	303027	380967	321131	378271	336582	337001	299113	194930	199902	165573	208256	180070	194996	208428	280887	222352	228113	252393	243032	197456	178715	186676	211800	205959
P60867	5	4	341.52	8.71578e-08	1.36173	Condition 1	Condition 2	40S ribosomal protein S20 OS=Mus musculus GN=Rps20 PE=1 SV=1	2.05356e+06	2.25289e+06	2.10977e+06	2.31283e+06	2.24079e+06	2.57649e+06	1.68239e+06	1.6817e+06	1.62768e+06	1.64842e+06	1.58271e+06	1.72498e+06	2.0028e+06	2.03987e+06	1.84275e+06	1.98567e+06	1.89862e+06	1.77396e+06	1.957e+06	1.91713e+06	1.9164e+06	1.88723e+06	1.84259e+06	2.08179e+06	1.63214e+06	2.01377e+06	1.62973e+06	2.19877e+06	1.75528e+06	2.44349e+06	1.25438e+06	1.6817e+06	1.35371e+06	1.65229e+06	1.35815e+06	1.7418e+06	1.07173e+06	1.18492e+06	1.03924e+06	1.36769e+06	1.07293e+06
P62313	4	4	131.51	8.80041e-08	1.44131	Condition 3	Condition 1	U6 snR0-associated Sm-like protein LSm6 OS=Mus musculus GN=Lsm6 PE=1 SV=1	264974	335618	252340	293989	280810	274681	326127	326911	353076	322001	353210	334508	447228	411260	375468	420791	397592	401356	351109	384719	363287	404623	343343	365872	210597	299995	194924	279490	219968	260502	243157	326911	293647	322756	303094	337770	239318	238892	211749	289832	224683
Q6NXI6	1	1	76.44	8.96318e-08	1.95823	Condition 2	Condition 1	Regulation of nuclear pre-mR0 domain-containing protein 2 OS=Mus musculus GN=Rprd2 PE=1 SV=1	132580	165445	96119.5	138123	100941	114655	220731	212986	267804	269176	235960	257830	177372	178857	185332	222012	206502	192264	209626	207358	196187	205813	251275	230639	105373	147884	74249.1	131311	79070.2	108737	164575	212986	222727	269808	202481	260344	94914.5	103894	104520	152918	116696
P34152	6	6	330.39	9.09329e-08	1.40475	Condition 1	Condition 3	Focal adhesion ki0se 1 OS=Mus musculus GN=Ptk2 PE=1 SV=3	494598	586622	574284	556591	531588	503880	411525	431801	387131	456951	412300	434135	392405	427938	350771	382575	369424	388737	364319	422455	441315	403980	425734	406519	393099	524358	443615	529142	416411	477869	306829	431801	321970	458024	353801	438368	209982	248580	197821	263510	208765
Q68ED7	4	4	315.71	9.20399e-08	1.33389	Condition 1	Condition 3	CREB-regulated transcription coactivator 1 OS=Mus musculus GN=Crtc1 PE=1 SV=1	1.16105e+06	1.098e+06	1.12628e+06	1.1627e+06	1.0052e+06	1.17136e+06	990159	976159	972111	979692	980531	1.03323e+06	927081	735074	868851	838886	816293	855145	887673	856965	928799	869141	959155	930871	922786	981456	870014	1.10536e+06	787402	1.11089e+06	738254	976159	808488	981992	841407	1.0433e+06	496094	426988	489997	577808	461295
Q8BJZ4	2	2	107.5	9.20912e-08	1.52594	Condition 1	Condition 3	28S ribosomal protein S35, mitochondrial OS=Mus musculus GN=Mrps35 PE=1 SV=2	266192	318715	305050	302049	310594	272113	223082	201366	210460	227975	199794	252228	186740	177052	220259	191392	211256	176334	245699	241359	271251	231091	262029	264748	211566	284887	235641	287153	243299	258066	166328	201366	175036	228510	171446	254687	99927.4	102845	124217	131827	119383
Q9WUR9	12	12	858.58	9.2784e-08	1.22857	Condition 4	Condition 1	Adenylate ki0se 4, mitochondrial OS=Mus musculus GN=Ak4 PE=1 SV=1	2.29592e+06	2.27972e+06	2.22036e+06	2.35268e+06	2.25584e+06	2.37352e+06	2.52281e+06	2.40751e+06	2.43517e+06	2.62627e+06	2.58464e+06	2.43195e+06	2.81709e+06	3.15683e+06	2.58825e+06	2.79207e+06	2.82896e+06	2.69527e+06	2.77123e+06	2.95412e+06	2.66999e+06	2.82552e+06	2.83188e+06	2.87449e+06	1.82476e+06	2.03775e+06	1.71516e+06	2.23665e+06	1.76707e+06	2.25099e+06	1.88098e+06	2.40751e+06	2.02529e+06	2.63243e+06	2.21791e+06	2.45566e+06	1.50747e+06	1.83373e+06	1.45967e+06	1.92313e+06	1.59867e+06
Q8R464	6	6	500.66	9.33034e-08	1.31159	Condition 3	Condition 1	Cell adhesion molecule 4 OS=Mus musculus GN=Cadm4 PE=1 SV=1	961507	978489	927096	926454	886649	924170	1.11367e+06	1.19496e+06	1.12376e+06	1.14312e+06	1.13325e+06	1.04526e+06	1.31017e+06	1.35986e+06	1.17648e+06	1.13442e+06	1.14928e+06	1.22042e+06	1.11671e+06	1.20207e+06	1.14306e+06	1.08829e+06	1.17612e+06	1.22282e+06	764191	874632	716151	880764	694541	876463	830343	1.19496e+06	934611	1.1458e+06	972456	1.05545e+06	701090	789911	663487	781365	649470
Q9DCV4	2	2	76.56	9.58854e-08	1.46813	Condition 4	Condition 1	Regulator of microtubule dy0mics protein 1 OS=Mus musculus GN=Rmdn1 PE=1 SV=2	85161.1	79536.9	79700.8	82986.5	80668.7	78384.9	108276	115383	109006	115824	115283	119137	107584	153740	105638	120829	117045	105213	114701	116334	118992	122411	129079	112639	67684.7	71094.8	61566.2	78893.9	63190.4	74338.6	80729.7	115383	90658	116096	98926.3	120299	57569.8	89304	59575.9	83224.8	66143.2
Q91WD5	5	5	296.63	9.71073e-08	2.23653	Condition 4	Condition 1	0DH dehydroge0se [ubiquinone] iron-sulfur protein 2, mitochondrial OS=Mus musculus GN=Ndufs2 PE=1 SV=1	271173	291611	233493	262720	411189	367394	474834	472710	420774	341882	415687	458371	296059	353526	485239	385019	349626	359235	664636	663227	774553	730055	628424	648912	215524	260659	180366	249763	322098	348428	354032	472710	349950	342684	356707	462840	158425	205356	273656	265193	197577
P97825	2	2	140.87	9.72251e-08	1.55486	Condition 1	Condition 2	Hematological and neurological expressed 1 protein OS=Mus musculus GN=Hn1 PE=1 SV=3	1.12891e+06	1.27495e+06	1.34718e+06	1.27398e+06	1.08652e+06	1.27934e+06	776018	735415	778488	887334	733022	843129	942328	1.06284e+06	838559	857038	789060	908532	847295	912892	951361	988874	962151	937691	897237	1.13963e+06	1.04065e+06	1.21115e+06	851104	1.2133e+06	578592	735415	647455	889417	629016	851349	504253	617383	472914	590311	445905
O55125	10	10	867.52	9.88817e-08	1.23038	Condition 4	Condition 2	Protein NipS0p homolog 1 OS=Mus musculus GN=Nips0p1 PE=1 SV=1	3.21142e+06	3.12577e+06	3.41805e+06	3.50025e+06	3.22205e+06	3.0722e+06	3.27066e+06	3.17624e+06	3.41971e+06	3.22294e+06	3.11024e+06	3.25973e+06	3.66109e+06	3.16606e+06	3.36156e+06	3.34586e+06	3.56535e+06	3.4473e+06	4.11275e+06	3.89614e+06	4.00608e+06	3.85776e+06	4.17191e+06	3.89792e+06	2.55239e+06	2.79399e+06	2.64033e+06	3.32763e+06	2.52394e+06	2.91361e+06	2.43857e+06	3.17624e+06	2.84411e+06	3.2305e+06	2.66894e+06	3.29151e+06	1.9591e+06	1.8391e+06	1.89579e+06	2.30457e+06	2.01481e+06
O55142	2	1	52.68	9.90736e-08	11.3684	Condition 1	Condition 3	60S ribosomal protein L35a OS=Mus musculus GN=Rpl35a PE=1 SV=2	224953	273870	296248	249362	246335	272170	59315	53034.9	18979.6	50960.1	43279.4	71941.7	14599.8	23677.6	23169.7	11064.7	8785.58	56184.1	49482.7	51073.3	16014.6	62110.9	20377.9	39490.8	178789	244801	228841	237064	192963	258120	44224.7	53034.9	15785	51079.7	37138.6	72643.1	7812.58	13753.8	13066.8	7621.13	4964.81
P53026	6	6	420.41	1.00297e-07	1.37761	Condition 3	Condition 2	60S ribosomal protein L10a OS=Mus musculus GN=Rpl10a PE=1 SV=3	1.03371e+06	1.09137e+06	1.09817e+06	1.05805e+06	1.01092e+06	1.07767e+06	952977	1.06218e+06	986457	1.12952e+06	981663	1.05978e+06	1.31934e+06	1.64438e+06	1.32298e+06	1.53971e+06	1.3549e+06	1.32213e+06	1.07708e+06	1.20837e+06	1.08387e+06	1.09111e+06	1.10187e+06	1.10686e+06	821580	975529	848299	1.00587e+06	791883	1.02204e+06	710531	1.06218e+06	820418	1.13217e+06	842378	1.07012e+06	705998	955181	746107	1.06052e+06	765667
Q9CQI7	4	4	187.75	1.00645e-07	1.93309	Condition 2	Condition 1	U2 small nuclear ribonucleoprotein B'' OS=Mus musculus GN=Snrpb2 PE=1 SV=1	249706	265133	230001	237651	292749	275344	412577	486878	660971	497390	504650	434946	297880	332119	380104	444111	316674	312619	417423	403547	430197	427121	420952	383064	198463	236992	177668	225931	229320	261131	307614	486878	549718	498557	433047	439187	159400	192921	214364	305895	178955
Q5DTY9	2	2	75.89	1.01063e-07	1.35809	Condition 4	Condition 1	BTB/POZ domain-containing protein KCTD16 OS=Mus musculus GN=Kctd16 PE=1 SV=2	104677	112244	104439	117195	97578.5	98658.8	127151	132300	135991	142374	144221	133646	121414	145117	134918	130081	126690	119496	141189	151656	143815	136179	147538	141726	83195.7	100331	80675.3	111415	76436.5	93565.9	94802.5	132300	113101	142708	123758	134949	64970.2	84295.5	76088.7	89597.5	71593.5
Q3UYV9	1	1	64.54	1.01366e-07	1.5787	Condition 3	Condition 1	Nuclear cap-binding protein subunit 1 OS=Mus musculus GN=Ncbp1 PE=1 SV=2	322657	332172	402556	347602	257677	349408	436214	474703	453759	541277	455978	548619	558445	562398	480392	523608	542078	509538	514651	521609	513074	506208	487201	496105	256443	296915	310961	330459	201847	331371	325237	474703	377384	542547	391281	553968	298832	326685	270922	360651	306333
P53657	1	1	28.32	1.04304e-07	1.49809	Condition 3	Condition 1	Pyruvate ki0se PKLR OS=Mus musculus GN=Pklr PE=1 SV=1	1.80741e+06	2.03688e+06	2.13971e+06	2.11726e+06	2.09259e+06	1.84639e+06	2.63173e+06	2.35982e+06	2.58923e+06	2.20961e+06	2.45846e+06	2.21938e+06	3.22221e+06	3.04835e+06	2.84865e+06	2.93666e+06	3.06737e+06	2.91407e+06	2.23523e+06	2.62987e+06	2.49493e+06	2.83587e+06	2.68798e+06	2.93569e+06	1.4365e+06	1.82068e+06	1.65285e+06	2.01284e+06	1.63919e+06	1.75107e+06	1.96219e+06	2.35982e+06	2.15342e+06	2.21479e+06	2.10964e+06	2.24102e+06	1.72425e+06	1.77072e+06	1.60653e+06	2.02271e+06	1.7334e+06
Q8CC35	14	14	1120.03	1.04589e-07	1.25728	Condition 4	Condition 1	Sy0ptopodin OS=Mus musculus GN=Synpo PE=1 SV=2	1.43063e+06	1.45804e+06	1.51371e+06	1.49687e+06	1.42846e+06	1.36658e+06	1.6935e+06	1.69048e+06	1.84691e+06	1.70108e+06	1.71489e+06	1.81045e+06	1.61237e+06	1.76945e+06	1.66158e+06	1.74378e+06	1.61257e+06	1.63886e+06	1.6997e+06	1.9433e+06	1.73802e+06	1.78488e+06	1.94297e+06	1.82231e+06	1.13705e+06	1.30329e+06	1.16929e+06	1.42305e+06	1.11896e+06	1.29604e+06	1.26266e+06	1.69048e+06	1.53604e+06	1.70508e+06	1.47157e+06	1.8281e+06	862804	1.02784e+06	937064	1.20108e+06	911280
Q8BHD7	2	2	179.55	1.08115e-07	3.00055	Condition 2	Condition 1	Polypyrimidine tract-binding protein 3 OS=Mus musculus GN=Ptbp3 PE=1 SV=1	349746	323606	348120	300582	403204	399206	1.05021e+06	1.17317e+06	1.19969e+06	1.01906e+06	955537	976886	614941	446136	635846	786650	352271	585285	896636	601783	545196	590932	1.00455e+06	779313	277973	289259	268911	285758	315843	378598	783028	1.17317e+06	997760	1.02146e+06	819959	986410	329064	259151	358592	541829	199071
O70194	10	10	808.66	1.08905e-07	1.3285	Condition 1	Condition 3	Eukaryotic translation initiation factor 3 subunit D OS=Mus musculus GN=Eif3d PE=1 SV=2	1.43422e+06	1.52364e+06	1.52257e+06	1.55108e+06	1.55452e+06	1.44702e+06	1.2247e+06	1.15082e+06	1.22784e+06	1.09131e+06	1.21021e+06	1.33463e+06	1.14971e+06	1.30859e+06	1.08085e+06	1.12101e+06	1.09841e+06	1.04087e+06	1.15645e+06	1.18986e+06	1.10439e+06	1.09311e+06	1.20539e+06	1.09301e+06	1.1399e+06	1.36192e+06	1.17614e+06	1.47459e+06	1.21771e+06	1.37232e+06	913126	1.15082e+06	1.02117e+06	1.09387e+06	1.03849e+06	1.34764e+06	615225	760131	609556	772132	620720
Q99JY9	10	10	817.32	1.1023e-07	1.20868	Condition 1	Condition 3	Actin-related protein 3 OS=Mus musculus GN=Actr3 PE=1 SV=3	5.80729e+06	5.90396e+06	6.18232e+06	5.67283e+06	6.24902e+06	5.88338e+06	5.08036e+06	4.94602e+06	4.85011e+06	4.93908e+06	4.98699e+06	5.30828e+06	5.12124e+06	5.15862e+06	4.7334e+06	4.74197e+06	4.58563e+06	5.19446e+06	5.17013e+06	5.12073e+06	5.04204e+06	4.83055e+06	5.15289e+06	4.89282e+06	4.61554e+06	5.27731e+06	4.77564e+06	5.39307e+06	4.89506e+06	5.57968e+06	3.78787e+06	4.94602e+06	4.03375e+06	4.95068e+06	4.2794e+06	5.36004e+06	2.74045e+06	2.99653e+06	2.66945e+06	3.26618e+06	2.59138e+06
B1AR13	1	1	32.13	1.15766e-07	1.60196	Condition 4	Condition 1	CDGSH iron-sulfur domain-containing protein 3, mitochondrial OS=Mus musculus GN=Cisd3 PE=1 SV=1	218690	230883	193703	208686	222455	222380	239159	213436	216965	276104	227570	270638	242276	338831	271576	309557	268536	266834	335505	363643	328716	345591	330895	373069	173812	206377	149629	198394	174256	210901	178315	213436	180446	276752	195281	273277	129646	196820	153158	213217	151752
O35405	5	5	373.51	1.16771e-07	1.46782	Condition 1	Condition 3	Phospholipase D3 OS=Mus musculus GN=Pld3 PE=1 SV=1	2.32387e+06	2.73828e+06	2.71471e+06	2.62508e+06	2.2142e+06	2.26435e+06	1.73697e+06	1.7965e+06	2.13709e+06	2.23034e+06	2.00892e+06	2.07316e+06	1.71702e+06	1.60405e+06	1.80654e+06	1.77074e+06	1.62565e+06	1.6138e+06	1.76364e+06	1.66452e+06	1.73486e+06	1.6946e+06	1.88478e+06	1.72162e+06	1.84698e+06	2.44764e+06	2.09702e+06	2.49562e+06	1.73445e+06	2.14746e+06	1.29507e+06	1.7965e+06	1.77738e+06	2.23558e+06	1.72388e+06	2.09337e+06	918804	931757	1.01882e+06	1.21965e+06	918668
P14106	3	3	218.98	1.18293e-07	1.437	Condition 4	Condition 2	Complement C1q subcomponent subunit B OS=Mus musculus GN=C1qb PE=1 SV=2	1.43403e+06	1.362e+06	1.32182e+06	1.16609e+06	1.05746e+06	1.21848e+06	1.09383e+06	1.17689e+06	996479	1.0098e+06	1.15996e+06	964853	1.42671e+06	1.47052e+06	1.55001e+06	1.48213e+06	1.55422e+06	1.5092e+06	1.58045e+06	1.5583e+06	1.60269e+06	1.57419e+06	1.45645e+06	1.42735e+06	1.13975e+06	1.21744e+06	1.02106e+06	1.10858e+06	828341	1.15558e+06	815550	1.17689e+06	828754	1.01217e+06	995379	974260	763452	854192	874143	1.02086e+06	878306
Q8CBW3	5	5	493.63	1.21355e-07	1.31827	Condition 1	Condition 4	Abl interactor 1 OS=Mus musculus GN=Abi1 PE=1 SV=3	4.78669e+06	4.67158e+06	4.51344e+06	4.67279e+06	4.27398e+06	4.42589e+06	4.30785e+06	4.20676e+06	4.19623e+06	4.6026e+06	4.31424e+06	4.30619e+06	3.47914e+06	4.26665e+06	3.54473e+06	3.86692e+06	3.99701e+06	3.86938e+06	3.57211e+06	3.30518e+06	3.15621e+06	3.74369e+06	3.50048e+06	3.46501e+06	3.80438e+06	4.17573e+06	3.48648e+06	4.44234e+06	3.34795e+06	4.19742e+06	3.2119e+06	4.20676e+06	3.48993e+06	4.61341e+06	3.70211e+06	4.34817e+06	1.86174e+06	2.4784e+06	1.99909e+06	2.66346e+06	2.25875e+06
Q9QWW1	1	1	37.22	1.21818e-07	1.50283	Condition 4	Condition 2	Homer protein homolog 2 OS=Mus musculus GN=Homer2 PE=1 SV=1	159412	155496	161097	153358	144036	149050	159886	140483	140937	134156	140050	128212	141427	171505	136639	142761	117538	142706	191920	221918	223870	230269	187711	212286	126698	138992	124442	145795	112828	141356	119210	140483	117215	134471	120178	129462	75679.4	99623.6	77059.1	98330.8	66421.5
Q61024	2	2	69.25	1.25024e-07	2.0535	Condition 1	Condition 2	Asparagine synthetase [glutamine-hydrolyzing] OS=Mus musculus GN=Asns PE=1 SV=3	73551.2	82803	81847	91536.8	82087.3	79195.2	43827.3	38400.5	34092.3	34662.6	50450.7	37680.9	51232.3	37622.8	37263.5	50754.2	65294.5	53042.2	51015.9	49823.5	49242.4	50388.4	47064	45636.3	58457.3	74014.2	63224.1	87022.5	64301.7	75107.1	32677.2	38400.5	28353.9	34744	43292.4	38048.3	27415.2	21854.2	21015.1	34958.5	36898.5
O35526	12	10	781.4	1.28395e-07	2.21127	Condition 1	Condition 3	Syntaxin-1A OS=Mus musculus GN=Stx1a PE=1 SV=3	1.77596e+06	1.85641e+06	1.40494e+06	1.42031e+06	2.09262e+06	1.97208e+06	1.1945e+06	1.16598e+06	1.14064e+06	1.08576e+06	1.16455e+06	1.16744e+06	945041	639464	827334	912104	829156	605394	1.13819e+06	927775	1.26205e+06	988512	1.33489e+06	1.21708e+06	1.41151e+06	1.65937e+06	1.08527e+06	1.35026e+06	1.63922e+06	1.87028e+06	890605	1.16598e+06	948648	1.08831e+06	999320	1.17882e+06	505705	371451	466584	628240	468564
Q9D1C8	1	1	24.27	1.28402e-07	1.55937	Condition 1	Condition 3	Vacuolar protein sorting-associated protein 28 homolog OS=Mus musculus GN=Vps28 PE=1 SV=1	75583.5	69989.6	73593.8	70493.7	68236.2	65837.5	55078.6	58993.2	59898.2	59233.9	56706.2	60367.3	41605.2	48403.1	39050.6	47313.5	51976.4	43385.2	51330.4	51854.2	63485.8	46715.2	51288.8	45228.4	60072.6	62560.8	56848.7	67017.2	53451.6	62438.9	41066.1	58993.2	49816.3	59373	48660.4	60955.9	22263.6	28116.3	22023	32588.6	29372.3
O88448	5	5	268.19	1.30166e-07	1.46693	Condition 1	Condition 4	Kinesin light chain 2 OS=Mus musculus GN=Klc2 PE=1 SV=1	603264	571392	608295	593835	585833	631898	505062	543788	467431	590893	511740	615226	428411	466746	462997	404417	425744	413886	393000	470087	344080	394730	422052	426416	479465	510744	469887	564549	458902	599279	376570	543788	388754	592280	439131	621225	229249	271122	261112	278555	240592
P10630	11	11	1062.78	1.30429e-07	1.4109	Condition 1	Condition 4	Eukaryotic initiation factor 4A-II OS=Mus musculus GN=Eif4a2 PE=1 SV=2	4.26043e+06	4.71292e+06	4.25068e+06	4.27216e+06	4.10839e+06	3.9334e+06	3.06165e+06	3.31341e+06	3.15873e+06	3.27804e+06	3.21922e+06	3.37343e+06	3.18379e+06	3.30218e+06	2.98102e+06	3.27658e+06	3.13188e+06	3.34235e+06	3.04261e+06	3.35015e+06	2.46378e+06	3.28981e+06	2.8763e+06	3.07791e+06	3.38612e+06	4.21269e+06	3.28351e+06	4.06147e+06	3.21824e+06	3.73036e+06	2.28274e+06	3.31341e+06	2.62706e+06	3.28573e+06	2.76245e+06	3.40632e+06	1.70369e+06	1.91816e+06	1.68118e+06	2.25684e+06	1.76985e+06
Q8BQ48	1	1	43.07	1.31432e-07	1.31962	Condition 1	Condition 4	Centrosomal protein of 295 kDa OS=Mus musculus GN=Cep295 PE=1 SV=3	464369	455732	442717	492746	409538	456509	360463	356833	343791	349961	369003	406412	370422	338517	359896	369966	330198	355371	323334	345616	340476	347247	326493	379256	369073	407360	341984	468445	320804	432944	268758	356833	285925	350783	316646	410374	198218	196637	202967	254825	186598
Q8BG73	2	2	114.95	1.32055e-07	1.38441	Condition 3	Condition 1	SH3 domain-binding glutamic acid-rich-like protein 2 OS=Mus musculus GN=Sh3bgrl2 PE=1 SV=1	796844	837482	773634	903629	744427	689576	798911	769300	821425	924297	792594	807309	1.06354e+06	1.24715e+06	1.02284e+06	1.06205e+06	1.13961e+06	1.03469e+06	1.00741e+06	1.18314e+06	1.07697e+06	1.01317e+06	1.00268e+06	1.15732e+06	633319	748591	597607	859065	583134	653979	595661	769300	683165	926466	680136	815181	569115	724439	576839	731521	644003
P70296	7	7	740.8	1.3225e-07	1.32026	Condition 3	Condition 2	Phosphatidylethanolamine-binding protein 1 OS=Mus musculus GN=Pebp1 PE=1 SV=3	1.34578e+07	1.36403e+07	1.43397e+07	1.38722e+07	1.30572e+07	1.49665e+07	1.15188e+07	1.21229e+07	1.19388e+07	1.21999e+07	1.22389e+07	1.248e+07	1.554e+07	1.75485e+07	1.51544e+07	1.54901e+07	1.53145e+07	1.66707e+07	1.41168e+07	1.71788e+07	1.41079e+07	1.56142e+07	1.52768e+07	1.50474e+07	1.06961e+07	1.21925e+07	1.10769e+07	1.31881e+07	1.02282e+07	1.41939e+07	8.58831e+06	1.21229e+07	9.92928e+06	1.22286e+07	1.05023e+07	1.26017e+07	8.31568e+06	1.01936e+07	8.54646e+06	1.06693e+07	8.65437e+06
Q05816	2	1	108.52	1.3304e-07	2.59536	Condition 1	Condition 2	Fatty acid-binding protein, epidermal OS=Mus musculus GN=Fabp5 PE=1 SV=3	99806.9	110799	95007.4	111952	102147	85871.4	38134.6	41924.5	39174.2	29412.8	40255.9	44431.2	112117	80153.8	66395	88833.2	63023.9	52198.8	67286.4	88741.9	77244.6	74312.4	56208.2	81566.9	79325	99038.4	73390.1	106431	80014.8	81438.6	28432.8	41924.5	32580.5	29481.8	34544.1	44864.4	59995.2	46559.6	37444.2	61186.6	35615.4
Q7TQF7	26	26	2220.3	1.34639e-07	1.22518	Condition 1	Condition 3	Amphiphysin OS=Mus musculus GN=Amph PE=1 SV=1	1.10343e+07	1.15269e+07	1.12987e+07	1.11253e+07	1.05055e+07	1.06331e+07	1.04728e+07	1.0061e+07	9.71708e+06	9.83179e+06	9.35495e+06	1.01185e+07	9.16509e+06	9.65874e+06	8.52761e+06	8.62435e+06	9.33452e+06	8.66021e+06	9.08971e+06	9.53774e+06	9.47699e+06	9.69537e+06	8.94717e+06	9.03177e+06	8.76989e+06	1.03035e+07	8.72783e+06	1.05766e+07	8.22933e+06	1.00843e+07	7.80842e+06	1.0061e+07	8.08152e+06	9.85487e+06	8.0276e+06	1.02172e+07	4.90437e+06	5.61055e+06	4.80923e+06	5.94028e+06	5.27502e+06
O55106	6	6	408.42	1.35015e-07	1.21821	Condition 1	Condition 3	Striatin OS=Mus musculus GN=Strn PE=1 SV=2	1.1247e+06	1.1499e+06	1.0126e+06	1.10438e+06	1.07227e+06	1.05967e+06	999357	990254	953170	1.00313e+06	954379	947937	889400	944915	815411	906603	879274	919423	911280	941188	893895	935308	942569	945419	893895	1.02785e+06	782197	1.04992e+06	839947	1.00497e+06	745111	990254	792735	1.00549e+06	818965	957179	475931	548880	459859	624450	496886
P50516	40	38	4199	1.36182e-07	1.92294	Condition 2	Condition 3	V-type proton ATPase catalytic subunit A OS=Mus musculus GN=Atp6v1a PE=1 SV=2	2.22976e+07	2.1934e+07	2.058e+07	2.09495e+07	2.34174e+07	2.43395e+07	2.35548e+07	2.30728e+07	2.21738e+07	2.43952e+07	2.13147e+07	2.14252e+07	1.06547e+07	7.92613e+06	1.50907e+07	1.64156e+07	1.07169e+07	9.88786e+06	1.87547e+07	1.95497e+07	1.86094e+07	1.92272e+07	1.96409e+07	1.88432e+07	1.77218e+07	1.96059e+07	1.58973e+07	1.99163e+07	1.83436e+07	2.30831e+07	1.75622e+07	2.30728e+07	1.84416e+07	2.44524e+07	1.82904e+07	2.16341e+07	5.7015e+06	4.60411e+06	8.51057e+06	1.13067e+07	6.05622e+06
O88485	15	15	1192.58	1.36381e-07	1.25027	Condition 1	Condition 4	Cytoplasmic dynein 1 intermediate chain 1 OS=Mus musculus GN=Dync1i1 PE=1 SV=2	1.46988e+06	1.63205e+06	1.57076e+06	1.64661e+06	1.60306e+06	1.55989e+06	1.50441e+06	1.33425e+06	1.28155e+06	1.30845e+06	1.29286e+06	1.34969e+06	1.39717e+06	1.42918e+06	1.31022e+06	1.31765e+06	1.30211e+06	1.29772e+06	1.24107e+06	1.23655e+06	1.26356e+06	1.2924e+06	1.30471e+06	1.24585e+06	1.16824e+06	1.45883e+06	1.21336e+06	1.5654e+06	1.25573e+06	1.47936e+06	1.12168e+06	1.33425e+06	1.06584e+06	1.31152e+06	1.10942e+06	1.36284e+06	747644	830182	738914	907570	735834
Q8R313	2	1	68.57	1.36922e-07	1.97019	Condition 1	Condition 3	Exocyst complex component 6 OS=Mus musculus GN=Exoc6 PE=1 SV=2	122154	124546	122108	140816	120859	112798	78267.3	91418	91579	101948	87691.5	99872.2	57042.8	64422.3	51417.5	63678.9	75486.3	65214.9	67155.7	95687	63556.3	90286.3	95268.1	86511.6	97086.4	111326	94324.4	133872	94672.4	106975	58355.4	91418	76164.6	102188	75249.3	100846	30524.4	37421.5	28997.4	43860.8	42658
Q99LC2	3	3	259.48	1.37139e-07	1.29683	Condition 3	Condition 1	Cleavage stimulation factor subunit 1 OS=Mus musculus GN=Cstf1 PE=1 SV=1	623995	637249	623597	634855	593605	646105	699577	623120	671788	685690	673056	677610	816575	894399	784622	770263	790525	818930	712646	729137	693609	819165	751091	674205	495942	569611	481708	603546	464991	612753	521599	623120	558714	687299	577558	684217	436961	519537	442496	530543	446733
Q61335	3	3	122.98	1.37899e-07	1.32871	Condition 3	Condition 4	B-cell receptor-associated protein 31 OS=Mus musculus GN=Bcap31 PE=1 SV=4	51794.3	57458.2	50755.5	50692.8	49267.6	53977.5	52855	48483.5	49734.1	48435.6	49544.9	49503.8	70091.7	58127.2	62014.8	68505.1	67926.5	69899.7	53443.6	49457.3	43713.3	50566.7	51770.1	49507.2	41165.3	51359.6	39206.9	48192.8	38592.9	51191.1	39408.2	48483.5	41363	48549.3	42515.2	49986.4	37507.1	33764.8	34973.9	47185	38385.9
Q99PV0	41	41	2272.89	1.39117e-07	1.53603	Condition 2	Condition 1	Pre-mR0-processing-splicing factor 8 OS=Mus musculus GN=Prpf8 PE=1 SV=2	881872	877216	1.23645e+06	1.0224e+06	976256	973330	1.62279e+06	1.487e+06	1.64352e+06	1.44803e+06	1.50751e+06	1.45746e+06	1.47391e+06	1.20161e+06	1.39069e+06	1.24194e+06	1.11405e+06	1.2101e+06	1.43651e+06	1.49578e+06	1.41527e+06	1.43487e+06	1.47695e+06	1.4001e+06	700898	784107	955115	971976	764733	923086	1.20993e+06	1.487e+06	1.36688e+06	1.45143e+06	1.29361e+06	1.47167e+06	788711	697991	784293	855424	629559
Q9ESU6	5	5	294.41	1.39377e-07	1.42925	Condition 3	Condition 1	Bromodomain-containing protein 4 OS=Mus musculus GN=Brd4 PE=1 SV=2	356546	318063	330233	309074	320831	307143	421788	412422	394229	406679	409811	376299	497365	528079	479697	391490	435301	443516	391983	378666	408476	375503	400499	390303	283377	284304	255094	293831	251318	291288	314481	412422	327873	407634	351664	379968	266147	306749	270530	269651	245992
P32067	15	15	992.62	1.39732e-07	1.88881	Condition 4	Condition 1	Lupus La protein homolog OS=Mus musculus GN=Ssb PE=1 SV=1	943994	915858	937643	881801	937630	878902	1.71832e+06	1.62219e+06	1.70511e+06	1.80296e+06	1.6096e+06	1.66935e+06	1.80862e+06	922400	1.62377e+06	1.50032e+06	1.70373e+06	1.52466e+06	1.63254e+06	1.87258e+06	1.93255e+06	1.76588e+06	1.67563e+06	1.50138e+06	750272	818648	724298	838313	734476	833532	1.28117e+06	1.62219e+06	1.41811e+06	1.80719e+06	1.38122e+06	1.68562e+06	967821	535802	915744	1.03339e+06	962794
P63166	2	2	115.32	1.40907e-07	1.38955	Condition 3	Condition 2	Small ubiquitin-related modifier 1 OS=Mus musculus GN=Sumo1 PE=1 SV=1	572122	608791	535514	571049	550872	564648	500625	563254	536961	544593	589825	532623	740049	760645	853994	689369	804280	692537	726440	636274	734432	601398	641818	653126	454714	544173	413666	542886	431516	535501	373262	563254	446581	545871	506136	537816	396011	441842	481619	474824	454506
Q9DD18	3	2	192.23	1.4363e-07	1.51001	Condition 3	Condition 2	D-tyrosyl-tR0(Tyr) deacylase 1 OS=Mus musculus GN=Dtd1 PE=1 SV=2	279843	371758	318715	293268	316950	312442	296439	329674	308427	309330	331961	279549	426925	428547	454588	530887	470962	489728	281507	332667	296795	376195	311098	337201	222415	332299	246197	278805	248277	296313	221022	329674	256513	310056	284860	282275	228454	248934	256369	365665	266145
O08795	10	10	705.75	1.44505e-07	1.26932	Condition 3	Condition 4	Glucosidase 2 subunit beta OS=Mus musculus GN=Prkcsh PE=1 SV=1	1.56924e+06	1.65314e+06	1.51926e+06	1.59398e+06	1.51518e+06	1.62707e+06	1.61457e+06	1.5897e+06	1.55393e+06	1.67825e+06	1.5048e+06	1.56576e+06	1.6588e+06	1.79121e+06	1.54313e+06	1.59287e+06	1.60236e+06	1.65175e+06	1.17202e+06	1.35973e+06	1.39265e+06	1.26606e+06	1.22711e+06	1.33471e+06	1.24721e+06	1.47768e+06	1.17357e+06	1.51537e+06	1.18689e+06	1.54307e+06	1.20381e+06	1.5897e+06	1.29238e+06	1.68218e+06	1.29129e+06	1.58103e+06	887649	1.04048e+06	870263	1.09714e+06	905509
Q9Z1S5	16	16	1601.94	1.44879e-07	1.17799	Condition 1	Condition 4	Neuro0l-specific septin-3 OS=Mus musculus GN=Sept3 PE=1 SV=2	1.46911e+07	1.4402e+07	1.38029e+07	1.34622e+07	1.38965e+07	1.45302e+07	1.42606e+07	1.42762e+07	1.31245e+07	1.39734e+07	1.46996e+07	1.40627e+07	1.27021e+07	1.30522e+07	1.21247e+07	1.08794e+07	1.18763e+07	1.17403e+07	1.20781e+07	1.20638e+07	1.1931e+07	1.21704e+07	1.18818e+07	1.1849e+07	1.16763e+07	1.28733e+07	1.06623e+07	1.27983e+07	1.08856e+07	1.37801e+07	1.06326e+07	1.42762e+07	1.09154e+07	1.40062e+07	1.2614e+07	1.41998e+07	6.79711e+06	7.58175e+06	6.83787e+06	7.49351e+06	6.71142e+06
Q3TUH1	2	2	71.44	1.45459e-07	1.59727	Condition 4	Condition 1	Phosphatidate cytidylyltransferase, mitochondrial OS=Mus musculus GN=Tamm41 PE=1 SV=2	171057	167128	133932	160807	112635	152555	152262	159330	148105	153226	137054	158792	200961	211666	180662	194604	186947	198149	205304	243544	243405	277219	231361	233695	135953	149389	103458	152876	88230.3	144680	113525	159330	123177	153586	117608	160340	107537	122952	101886	134040	105646
Q04447	31	31	4136.77	1.48053e-07	1.24321	Condition 1	Condition 4	Creatine ki0se B-type OS=Mus musculus GN=Ckb PE=1 SV=1	2.00905e+08	2.02072e+08	2.08002e+08	2.04475e+08	2.00663e+08	2.07611e+08	1.83148e+08	1.72635e+08	1.8346e+08	1.92689e+08	1.82558e+08	1.74053e+08	1.83285e+08	1.51821e+08	1.66122e+08	1.79262e+08	1.68359e+08	1.63194e+08	1.67649e+08	1.63891e+08	1.67672e+08	1.5669e+08	1.70826e+08	1.57606e+08	1.59676e+08	1.80624e+08	1.60675e+08	1.94391e+08	1.57186e+08	1.96894e+08	1.36553e+08	1.72635e+08	1.52581e+08	1.93141e+08	1.56656e+08	1.7575e+08	9.80786e+07	8.81896e+07	9.36862e+07	1.23472e+08	9.5141e+07
P62774	2	2	155.38	1.54568e-07	1.56151	Condition 1	Condition 3	Myotrophin OS=Mus musculus GN=Mtpn PE=1 SV=2	2.61991e+06	2.61131e+06	2.61283e+06	2.65748e+06	2.35748e+06	2.5629e+06	1.86135e+06	1.68427e+06	1.69122e+06	1.8094e+06	1.7336e+06	1.7715e+06	1.98558e+06	1.63946e+06	1.69824e+06	1.1826e+06	1.63594e+06	1.73446e+06	1.81734e+06	1.74352e+06	1.8165e+06	1.84073e+06	1.80687e+06	1.85966e+06	2.08226e+06	2.33414e+06	2.01832e+06	2.52642e+06	1.84669e+06	2.4306e+06	1.38781e+06	1.68427e+06	1.40656e+06	1.81364e+06	1.48762e+06	1.78877e+06	1.06251e+06	952327	957740	814552	924484
Q7SIG6	2	2	67.74	1.57029e-07	1.66245	Condition 1	Condition 3	Arf-GAP with SH3 domain, ANK repeat and PH domain-containing protein 2 OS=Mus musculus GN=Asap2 PE=1 SV=3	312556	351001	326557	381947	333636	358614	298175	235345	271877	296898	266993	253834	171377	228022	212439	200561	206844	222486	287111	210651	257506	254819	233355	217360	248414	313745	252255	363111	261348	340102	222317	235345	226116	297595	229111	256309	91706.3	132453	119807	138142	116889
Q923D2	2	2	78.84	1.59439e-07	1.30866	Condition 1	Condition 2	Flavin reductase (0DPH) OS=Mus musculus GN=Blvrb PE=1 SV=3	188840	187317	187254	184390	173388	169396	127420	143893	135429	142054	136490	148074	155942	162763	142666	143612	147647	141396	163931	149451	142266	153336	151670	159867	150087	167435	144647	175296	135821	160652	95003.2	143893	112634	142387	117124	149518	83446.8	94545.4	80457.9	98917.4	83436.6
Q6P2B1	1	1	35.19	1.60565e-07	2.35437	Condition 1	Condition 3	Transportin-3 OS=Mus musculus GN=Tnpo3 PE=1 SV=1	47364	49398.8	46266.7	53021.4	39843.3	52452.1	32865	25401.7	32574.6	21902.5	26782.3	23382.7	14359.4	23816.5	15491.3	22885.1	24959	20961.7	27601.5	27350.2	24811.9	24592.2	33819	29655.6	37644.1	44155.5	35739.5	50406.6	31210.6	49744.5	24503.8	25401.7	27091.8	21953.9	22982.2	23610.7	7683.92	13834.5	8736.47	15762.8	14104.6
P70297	7	7	491.7	1.60648e-07	1.22324	Condition 1	Condition 2	Sig0l transducing adapter molecule 1 OS=Mus musculus GN=Stam PE=1 SV=3	770987	798640	750982	855081	839088	801402	659018	682448	655221	663489	624002	653049	730403	709480	646833	652587	678449	694805	708481	758993	729477	740214	710597	719626	612769	713871	580109	812912	657285	760033	491358	682448	544936	665046	535464	659416	390849	412121	364788	449490	383398
P47757	11	10	1129.47	1.61927e-07	1.36309	Condition 1	Condition 2	F-actin-capping protein subunit beta OS=Mus musculus GN=Capzb PE=1 SV=3	6.9081e+06	7.75078e+06	7.10387e+06	7.72584e+06	6.93656e+06	7.66997e+06	5.52168e+06	5.58689e+06	5.44216e+06	5.57048e+06	5.11274e+06	5.11544e+06	6.09644e+06	7.1688e+06	6.37062e+06	6.21968e+06	6.94637e+06	5.9442e+06	6.18169e+06	5.78788e+06	6.69316e+06	6.36377e+06	5.9119e+06	5.93289e+06	5.49045e+06	6.9281e+06	5.4875e+06	7.34483e+06	5.43364e+06	7.27404e+06	4.11692e+06	5.58689e+06	4.52615e+06	5.58355e+06	4.38731e+06	5.16531e+06	3.2623e+06	4.1642e+06	3.59278e+06	4.28399e+06	3.92545e+06
Q8QZT2	2	2	93.79	1.63783e-07	1.53844	Condition 1	Condition 3	Centriole, cilia and spindle-associated protein OS=Mus musculus GN=Ccsap PE=1 SV=1	367303	435311	476356	410672	395507	418027	309641	321403	316849	330368	341800	369073	257625	239322	299486	290381	238389	301889	382237	348754	349323	333396	340954	347056	291927	389107	367969	390419	309813	396448	230865	321403	263518	331143	293303	372671	137859	139017	168898	200009	134716
Q6PDN3	2	1	111.25	1.67539e-07	1.32911	Condition 1	Condition 4	Myosin light chain ki0se, smooth muscle OS=Mus musculus GN=Mylk PE=1 SV=3	306279	341583	305214	316556	289632	314091	242516	248781	251276	264613	244468	241311	268682	300570	255288	280070	242684	290620	225847	251480	221724	240187	235812	234427	243426	305327	235768	300944	226878	297878	180818	248781	208982	265235	209781	243664	143776	174595	143973	192907	137143
A2A9T0	1	1	31.82	1.70545e-07	2.23113	Condition 2	Condition 4	TANK-binding ki0se 1-binding protein 1 OS=Mus musculus GN=Tbkbp1 PE=1 SV=1	50880.5	68692.9	39301.7	49914.3	56419	51813.6	81864.9	102349	90356.3	81547.4	91973.5	93901.3	84579.6	73122.8	83326.6	77160.9	71612.8	80304.5	56529.8	44538.8	32641.3	26008.5	38942.2	44261.7	40439	61401.8	30359.3	47452.7	44194.8	49138.9	61037.7	102349	75147.7	81738.8	78923.7	94816.8	45259.8	42475.4	46992.9	53147	40469
P61290	1	1	34.35	1.70617e-07	1.52829	Condition 1	Condition 4	Proteasome activator complex subunit 3 OS=Mus musculus GN=Psme3 PE=1 SV=1	53897.8	50171.7	52660.7	57559.2	54511.9	52235.2	34038.1	32529.9	37669.9	42637.4	31780	37480.7	37638.4	36468.7	37102.2	41978.3	33830.9	29952.4	33503.9	33363.3	34619.8	36953.2	40025.9	31595.9	42837.1	44846.4	40678.6	54720.6	42701	49538.7	25378.5	32529.9	31329.4	42737.5	27270.8	37846.2	20140.8	21183.9	20924.1	28913.8	19118.2
Q8C0P5	13	12	646.55	1.72327e-07	1.30024	Condition 4	Condition 2	Coronin-2A OS=Mus musculus GN=Coro2a PE=2 SV=1	1.10694e+06	1.15861e+06	1.16597e+06	1.14088e+06	1.07856e+06	1.11333e+06	1.13569e+06	1.1113e+06	1.09146e+06	1.11921e+06	1.06776e+06	1.14272e+06	1.24513e+06	1.39084e+06	1.10321e+06	1.22728e+06	1.06089e+06	1.22049e+06	1.35814e+06	1.51227e+06	1.44217e+06	1.46383e+06	1.45812e+06	1.43563e+06	879776	1.03564e+06	900674	1.08461e+06	844871	1.05586e+06	846763	1.1113e+06	907744	1.12184e+06	916258	1.15386e+06	666289	807910	622168	845326	599517
Q8BYI9	40	39	3418.35	1.74572e-07	1.24716	Condition 1	Condition 2	Te0scin-R OS=Mus musculus GN=Tnr PE=1 SV=2	1.34214e+07	1.42292e+07	1.34761e+07	1.40484e+07	1.32914e+07	1.3922e+07	1.11934e+07	1.0723e+07	1.06525e+07	1.14925e+07	1.07805e+07	1.1219e+07	1.12057e+07	1.31717e+07	1.0862e+07	1.11457e+07	1.09763e+07	1.11066e+07	1.13781e+07	1.18974e+07	1.19985e+07	1.15774e+07	1.23875e+07	1.19566e+07	1.06671e+07	1.27189e+07	1.04098e+07	1.33556e+07	1.04116e+07	1.32033e+07	8.34569e+06	1.0723e+07	8.85949e+06	1.15195e+07	9.25086e+06	1.13284e+07	5.99632e+06	7.65115e+06	6.12576e+06	7.67697e+06	6.20279e+06
P61967	3	3	216.61	1.76237e-07	1.57412	Condition 1	Condition 3	AP-1 complex subunit sigma-1A OS=Mus musculus GN=Ap1s1 PE=1 SV=1	440663	552511	453950	468079	419688	505892	370883	353735	330006	372084	318321	329480	309347	333434	280291	275651	307470	298488	240552	311958	343011	309302	340880	306531	350232	493867	350661	444995	328755	479777	276527	353735	274460	372957	273155	332692	165536	193684	158073	189863	173754
Q62241	3	3	418.55	1.76748e-07	1.28741	Condition 3	Condition 1	U1 small nuclear ribonucleoprotein C OS=Mus musculus GN=Snrpc PE=1 SV=1	2.02747e+06	2.00953e+06	1.86279e+06	2.03402e+06	1.8821e+06	2.01819e+06	2.63355e+06	2.49961e+06	2.35739e+06	2.57997e+06	2.34841e+06	2.62787e+06	2.56101e+06	2.9398e+06	2.50908e+06	2.42089e+06	2.35158e+06	2.45297e+06	2.21827e+06	2.33659e+06	2.22966e+06	2.22762e+06	2.13143e+06	2.25799e+06	1.6114e+06	1.79624e+06	1.43894e+06	1.93371e+06	1.47431e+06	1.914e+06	1.96355e+06	2.49961e+06	1.9606e+06	2.58603e+06	2.0152e+06	2.65349e+06	1.37043e+06	1.70766e+06	1.41502e+06	1.66746e+06	1.3289e+06
P62754	4	3	368.5	1.78828e-07	1.44535	Condition 1	Condition 3	40S ribosomal protein S6 OS=Mus musculus GN=Rps6 PE=1 SV=1	1.99955e+06	1.99757e+06	1.94504e+06	2.00962e+06	2.01967e+06	1.96042e+06	1.64941e+06	1.645e+06	1.55687e+06	1.55327e+06	1.49445e+06	1.57791e+06	1.27624e+06	1.59145e+06	1.14471e+06	1.40819e+06	1.44713e+06	1.38759e+06	1.59807e+06	1.76824e+06	1.48767e+06	1.57362e+06	1.65781e+06	1.44189e+06	1.58921e+06	1.78555e+06	1.50247e+06	1.91051e+06	1.58207e+06	1.85923e+06	1.22979e+06	1.645e+06	1.29483e+06	1.55691e+06	1.28241e+06	1.5933e+06	682937	924436	645571	969937	817789
Q6PIE5	23	21	1745.87	1.80203e-07	2.12407	Condition 2	Condition 1	Sodium/potassium-transporting ATPase subunit alpha-2 OS=Mus musculus GN=Atp1a2 PE=1 SV=1	3.20099e+06	3.02836e+06	2.12251e+06	2.1359e+06	3.34674e+06	3.52017e+06	6.11375e+06	6.16429e+06	5.84015e+06	6.41839e+06	6.0733e+06	6.25269e+06	3.25899e+06	3.47701e+06	4.27623e+06	5.00755e+06	3.23607e+06	3.07502e+06	4.47996e+06	4.93593e+06	4.68285e+06	4.93528e+06	4.43645e+06	4.75846e+06	2.5441e+06	2.70693e+06	1.63957e+06	2.03057e+06	2.62161e+06	3.33845e+06	4.55836e+06	6.16429e+06	4.85715e+06	6.43345e+06	5.21158e+06	6.31365e+06	1.74393e+06	2.01972e+06	2.41163e+06	3.4491e+06	1.82874e+06
O08600	8	8	574.27	1.81621e-07	1.37663	Condition 2	Condition 1	Endonuclease G, mitochondrial OS=Mus musculus GN=Endog PE=1 SV=1	821280	868192	824772	788807	766508	780072	1.12602e+06	1.17661e+06	1.1394e+06	1.13373e+06	978546	1.12185e+06	1.08474e+06	1.2544e+06	1.00061e+06	1.02813e+06	1.20663e+06	1.0505e+06	865590	1.02747e+06	985866	939909	944299	875657	652740	776042	637109	749906	600431	739803	839548	1.17661e+06	947620	1.13639e+06	839704	1.13278e+06	580461	728651	564302	708158	681880
Q8BWR2	1	1	77.94	1.81936e-07	1.43629	Condition 4	Condition 2	PITH domain-containing protein 1 OS=Mus musculus GN=Pithd1 PE=1 SV=1	422126	430075	389055	388415	404635	393725	274158	303018	294359	266418	309485	258946	392446	343091	434811	432886	386357	447151	394238	419040	389267	452080	350250	445987	335499	384427	300532	369260	316964	373400	204410	303018	244813	267044	265574	261471	210003	199294	245216	298163	218334
P49615	7	7	359.82	1.82464e-07	1.34156	Condition 1	Condition 2	Cyclin-dependent-like ki0se 5 OS=Mus musculus GN=Cdk5 PE=1 SV=1	1.35027e+06	1.43285e+06	1.46647e+06	1.40566e+06	1.38993e+06	1.34937e+06	1.09472e+06	990304	1.04884e+06	1.13698e+06	998526	987955	1.13267e+06	1.35817e+06	1.08272e+06	1.1791e+06	1.12641e+06	1.13331e+06	1.17685e+06	1.20717e+06	1.12252e+06	1.13781e+06	1.17266e+06	1.07566e+06	1.07318e+06	1.28077e+06	1.1328e+06	1.33634e+06	1.08877e+06	1.27972e+06	816213	990304	872305	1.13965e+06	856848	997587	606111	788930	610611	812143	636546
Q8C650	4	3	152.86	1.87604e-07	1.25222	Condition 1	Condition 4	Septin-10 OS=Mus musculus GN=Sept10 PE=1 SV=1	859624	875332	854140	865268	829110	827164	803372	798622	747927	798469	789051	821450	690260	809715	751122	742076	736971	690724	645821	718839	630513	690907	681724	713454	683216	782424	659795	822596	649469	784465	598987	798622	622038	800343	677095	829459	369368	470346	423603	511128	416469
Q6ZWM4	3	2	308.98	1.88556e-07	1.3248	Condition 3	Condition 1	U6 snR0-associated Sm-like protein LSm8 OS=Mus musculus GN=Lsm8 PE=1 SV=3	1.00732e+06	973760	1.07919e+06	1.10716e+06	1.04685e+06	1.06552e+06	1.328e+06	1.15906e+06	1.35882e+06	1.15826e+06	1.23191e+06	1.23547e+06	1.47765e+06	1.5269e+06	1.39307e+06	1.29566e+06	1.31093e+06	1.31526e+06	1.35448e+06	1.27597e+06	1.28532e+06	1.2834e+06	1.32321e+06	1.27713e+06	800600	870405	833635	1.05256e+06	820036	1.01052e+06	990143	1.15906e+06	1.1301e+06	1.16098e+06	1.05712e+06	1.24752e+06	790712	886942	785637	892429	740819
Q06138	9	8	363.41	1.89862e-07	1.30526	Condition 1	Condition 4	Calcium-binding protein 39 OS=Mus musculus GN=Cab39 PE=1 SV=2	455935	465414	481256	512058	502589	497975	428210	415779	435050	428074	429880	496622	405811	387197	398953	424717	413651	408478	352343	367455	405050	353233	396424	358944	362370	416015	371754	486805	393695	472269	319269	415779	361823	429079	368886	501464	217156	224914	224994	292537	233758
P08113	37	37	3065.44	1.90672e-07	1.26109	Condition 3	Condition 4	Endoplasmin OS=Mus musculus GN=Hsp90b1 PE=1 SV=2	8.59678e+06	8.86775e+06	8.13548e+06	8.53004e+06	8.07305e+06	8.05196e+06	8.37584e+06	8.4775e+06	8.15883e+06	8.6183e+06	7.88592e+06	8.08483e+06	9.50677e+06	1.05869e+07	8.83981e+06	9.18497e+06	8.98134e+06	9.6009e+06	7.48746e+06	7.7137e+06	7.33381e+06	7.65845e+06	7.25877e+06	7.5096e+06	6.83259e+06	7.92652e+06	6.28438e+06	8.10936e+06	6.32388e+06	7.63631e+06	6.24495e+06	8.4775e+06	6.78555e+06	8.63853e+06	6.76701e+06	8.16366e+06	5.08721e+06	6.14969e+06	4.9853e+06	6.32643e+06	5.07543e+06
O55201	6	6	271.97	1.91391e-07	1.44851	Condition 3	Condition 1	Transcription elongation factor SPT5 OS=Mus musculus GN=Supt5h PE=1 SV=1	349141	310485	393543	356134	349829	357022	391058	446323	485880	499438	523121	503325	521084	440706	516156	520200	518565	548553	471378	489110	483776	493785	488782	468066	277492	277530	303999	338571	274032	338592	291569	446323	404098	500611	448897	508232	278840	255996	291092	358304	293046
[truncated: 2,432 more rows]
[truncated: 7 more columns]

## Sheet: heart
									Normalized abundance																								Raw abundance
[truncated: 2,112 more rows]
[truncated: 7 more columns]

## Sheet: kidney
									Normalized abundance																								Raw abundance
[truncated: 2,648 more rows]
[truncated: 7 more columns]

## Sheet: liver
									Normalized abundance																								Raw abundance
[truncated: 2,519 more rows]
[truncated: 7 more columns]

[truncated: 8 more sheets: lung, spleen, brain_Volcano, heart_Volcano, kidney_Volcano, Liver_Volcano, Lung_Volcano, Spleen_volcano]
