# Supplementary material for: Distinct and diverse chromatin proteomes of ageing mouse organs reveal protein signatures that correlate with physiological functions
Source: eLife journal article supplement (doi:10.7554/elife.73524), 2022-03-08
Supplement: supp [file elife-73524-supp-v1.zip › elife_poa_e73524_Supplementary_file_4.xlsx]

## Sheet: Sheet1
PROTEIN ID	DESCRIPTION	GENE NAME	TISSUE	REGULATED from 3 to 15 months	REGULATED	3_1	3_2	3_3	5_1	5_2	5_3	10_1	10_2	10_3	15_1	15_2	15_3
Q64288	Olfactory marker protein	OMP	BRAIN	REGULATED	up	-3.24188	-3.32544	-2.89862	0.357906	0.131277	0.201063	0.76365	0.740751	0.945031	1.84592	1.6718	1.71962
Q9CXS4	Centromere protein V (CENP-V) (Proline-rich protein 6)	CENPV	BRAIN	REGULATED	up	-0.786306	-0.899648	-0.841331	1.41922	1.35389	1.44635	1.67582	1.79916	1.78165	2.50361	2.51118	2.38973
Q8BYP3	Rho-related GTP-binding protein RhoF	RHOF	BRAIN	REGULATED	up	-4.40111	-4.0604	-4.1682	-1.32973	-1.69958	-1.62999	-1.59928	-1.5945	-1.62051	-1.11247	-0.970801	-0.892451
P54869	Hydroxymethylglutaryl-CoA synthase, mitochondrial (HMG-CoA synthase) (EC 2.3.3.10) (3-hydroxy-3-methylglutaryl coenzyme A synthase)	HMGCS2	BRAIN	REGULATED	up	-4.2451	-4.02403	-5.50274	-4.44744	-3.65695	-4.29938	-2.82812	-2.08727	-2.45644	-1.25452	-1.03223	-1.64907
Q9DCS2	UPF0585 protein C16orf13 homolog	C16ORF13	BRAIN	REGULATED	up	-3.43187	-6.41248	-7.76307	-4.67546	-1.67719	-8.09037	-0.469058	-0.434192	-0.672968	-0.636337	-0.301259	-3.29419
O09161	Calsequestrin-2 (Calsequestrin, cardiac muscle isoform)	CASQ2	BRAIN	REGULATED	up	-5.31069	-8.25392	-4.39344	-3.34547	-2.67408	-3.03716		-3.48052	-5.13965	-2.9224	-2.45526	-2.46975
P03911	NADH-ubiquinone oxidoreductase chain 4 (EC 1.6.5.3) (NADH dehydrogenase subunit 4)	MTND4	BRAIN	REGULATED	up	-3.83586	-3.35185	-2.86212	-1.69128	-2.78819	-1.91951	-9.82945	-2.13363	-6.594	-0.694215	-0.628804	-0.919799
P63082	V-type proton ATPase 16 kDa proteolipid subunit (V-ATPase 16 kDa proteolipid subunit) (PL16) (Vacuolar proton pump 16 kDa proteolipid subunit)	ATP6V0C	BRAIN	REGULATED	up	-2.79082	-4.76524	-1.92136	-1.90131	-1.95215	-1.75685	-3.727	-1.99021	-4.39046	-0.201735	-0.0671165	-0.0489997
Q9DCS9	NADH dehydrogenase [ubiquinone] 1 beta subcomplex subunit 10 (Complex I-PDSW) (CI-PDSW) (NADH-ubiquinone oxidoreductase PDSW subunit)	NDUFB10	BRAIN	REGULATED	up	-1.78616	-2.097	-1.67178	-0.387578	-0.530331	-0.394552	-0.762368	-0.366861	-0.891805	0.665574	0.717031	0.570581
Q99LC3	NADH dehydrogenase [ubiquinone] 1 alpha subcomplex subunit 10, mitochondrial (Complex I-42kD) (CI-42kD) (NADH-ubiquinone oxidoreductase 42 kDa subunit)	NDUFA10	BRAIN	REGULATED	up	-2.35347	-2.62576	-2.50674	-0.505314	-0.435398	-0.326168	-1.50996	-0.881529	-0.819038	0.0034393	0.239132	-0.403724
Q9ESM3	Hyaluronan and proteoglycan link protein 2 (Brain link protein 1)	HAPLN2	BRAIN	REGULATED	up	-4.0798	-4.10652	-3.9591	-2.94253	-3.10515	-2.90098	-1.8826	-1.66423	-1.56627	-1.68894	-1.56622	-1.72467
P0DN34	NADH dehydrogenase [ubiquinone] 1 beta subcomplex subunit 1 (Complex I-MNLL) (CI-MNLL) (NADH-ubiquinone oxidoreductase MNLL subunit)	NDUFB1	BRAIN	REGULATED	up	-3.3337	-3.53802	-3.31816	-1.92693	-1.82114	-1.74947	-1.96244	-1.85225	-1.73608	-0.954902	-0.994734	-1.11112
Q9CR62	Mitochondrial 2-oxoglutarate/malate carrier protein (OGCP) (Solute carrier family 25 member 11)	SLC25A11	BRAIN	REGULATED	up	-2.14948	-2.57461	-1.86832	-0.853017	-1.20033	-1.21556	-0.43441	-0.892072	-1.06441	0.229059	0.373732	0.189513
Q91WN1	DnaJ homolog subfamily C member 9	DNAJC9	BRAIN	REGULATED	up	-4.18247	-4.48953	-3.67903	-2.3173	-2.59075	-2.21107	-2.10846	-1.99906	-1.86763	-1.56742	-1.77295	-1.76767
Q80X32	UPF0461 protein C5orf24 homolog	C5ORF24	BRAIN	REGULATED	up	-1.56283	-1.82375	-1.77247	0.917424	0.864912	0.814676	0.584523	0.743934	0.601319	0.567194	0.622733	0.51669
P43275	Histone H1.1 (H1 VAR.3) (Histone H1a) (H1a)	HIST1H1A	BRAIN	REGULATED	up	0.702837	0.652032	0.77351	3.02728	3.06329	3.00069	2.5037	2.66125	2.67817	2.97298	3.05509	2.94236
Q9CPU2	NADH dehydrogenase [ubiquinone] 1 beta subcomplex subunit 2, mitochondrial (Complex I-AGGG) (CI-AGGG) (NADH-ubiquinone oxidoreductase AGGG subunit)	NDUFB2	BRAIN	REGULATED	up	-2.70681	-2.44887	-2.67862	-1.40622	-1.92904	-2.00743	-1.0736	-1.29482	-0.96991	-0.407627	-0.174555	-0.7285
Q9CPX8	Cytochrome b-c1 complex subunit 10 (Complex III subunit 10) (Complex III subunit XI) (Ubiquinol-cytochrome c reductase complex 6.4 kDa protein)	UQCR11	BRAIN	REGULATED	up	-3.05001	-3.08944	-3.05435	-1.16434	-1.18456	-1.39354	-2.16176	-1.82922	-1.45404	-0.894728	-0.470305	-1.13561
P67778	Prohibitin (B-cell receptor-associated protein 32) (BAP 32)	PHB	BRAIN	REGULATED	up	-3.14455	-3.27068	-2.9318	-2.21707	-2.33186	-2.22563	-2.24478	-2.04043	-2.10303	-0.959334	-0.874237	-0.895483
P10922	Histone H1.0 (Histone H1') (Histone H1(0)) (MyD196) [Cleaved into: Histone H1.0, N-terminally processed]	H1F0	BRAIN	REGULATED	up	4.15782	4.10154	4.26213	6.10987	6.04832	6.08906	6.22346	6.29777	6.36751	6.28525	6.26368	6.22833
Q91V61	Sideroflexin-3	SFXN3	BRAIN	REGULATED	up	-1.83356	-1.95126	-2.15958	-1.0836	-1.12896	-0.967572	-1.47788	-1.19664	-1.12012	0.167397	0.116195	-0.0855615
Q8CGP0	Histone H2B type 3-B	HIST3H2BB	BRAIN	REGULATED	up	2.91095	2.81159	3.06337	4.88193	4.72292	4.73842	5.08847	5.1012	5.09519	5.0087	5.0567	4.948
P15864	Histone H1.2 (H1 VAR.1) (H1c)	HIST1H1C	BRAIN	REGULATED	up	3.95371	3.62658	3.92737	5.87206	5.74231	5.81774	5.76627	5.75955	5.81445	5.93171	5.86557	5.77703
P56391	Cytochrome c oxidase subunit 6B1 (Cytochrome c oxidase subunit VIb isoform 1) (COX VIb-1)	COX6B1	BRAIN	REGULATED	up	1.72627	1.66818	1.75898	4.7952	4.72732	4.79542	2.93435	3.03524	3.02108	3.76234	3.69796	3.60712
Q8BW75	Amine oxidase [flavin-containing] B (EC 1.4.3.4) (Monoamine oxidase type B) (MAO-B)	MAOB	BRAIN	REGULATED	up	-2.61604	-2.63851	-2.20972	-1.77201	-1.97436	-1.87702	-1.35201	-1.56996	-1.34767	-0.393007	-0.580147	-0.695957
P43274	Histone H1.4 (H1 VAR.2) (H1e)	HIST1H1E	BRAIN	REGULATED	up	5.25418	5.13243	5.36872	7.21837	7.13216	7.25464	7.18284	7.28731	7.23206	7.23203	7.23618	7.14371
P58854	Gamma-tubulin complex component 3 (GCP-3)	TUBGCP3	BRAIN	REGULATED	up	-4.21185	-8.26702	-2.94951	-2.96102	-3.71047	-3.37124	-5.94265	-3.38147	-3.77902	-2.54548	-2.23916	-2.3199
Q6GSS7	Histone H2A type 2-A (H2a-614) (H2a-615) (Histone H2A.2)	HIST2H2AA1; HIST2H2AA2	BRAIN	REGULATED	up	4.81725	4.94153	5.18797	6.75619	6.68312	6.8069	6.73758	6.70827	6.77389	6.92841	6.97126	6.6481
P17665	Cytochrome c oxidase subunit 7C, mitochondrial (Cytochrome c oxidase polypeptide VIIc)	COX7C	BRAIN	REGULATED	up	-2.74785	-2.98549	-2.62341	-1.32537	-1.29388	-1.26373	-1.74779	-1.43735	-1.72711	-0.767624	-0.872463	-0.96589
Q3TEA8	Heterochromatin protein 1-binding protein 3	HP1BP3	BRAIN	REGULATED	up	2.44584	1.88672	2.76224	3.97945	3.89315	3.80628	3.52054	3.76637	3.56061	4.23994	4.2836	4.20771
Q925N0	Sideroflexin-5	SFXN5	BRAIN	REGULATED	up	-2.29246	-2.96877	-1.99168	-1.05884	-1.44968	-1.03241	-1.62338	-1.19394	-1.73213	-0.516592	-0.443031	-0.625224
P00405	Cytochrome c oxidase subunit 2 (Cytochrome c oxidase polypeptide II)	MTCO2	BRAIN	REGULATED	up	0.448469	0.402991	0.495175	1.62007	1.76315	1.65654	1.279	1.39243	1.40292	2.20842	2.3031	2.21044
Q64459	Cytochrome P450 3A11 (EC 1.14.14.1) (CYPIIIA11) (Cytochrome P-450IIIAM1) (Cytochrome P-450UT)	CYP3A11	BRAIN	REGULATED	up	3.40724	3.24569	3.50536	4.97199	4.92628	5.12439	4.90051	4.93956	5.00296	5.24659	5.24273	5.079
P22752	Histone H2A type 1	HIST1H2AB; HIST1H2AC; HIST1H2AD; HIST1H2AE; HIST1H2AG; HIST1H2AI; HIST1H2AN; HIST1H2AO	BRAIN	REGULATED	up	8.9516	8.9745	9.16677	10.6958	10.7247	10.6861	9.97466	10.4009	10.5802	10.8353	10.9334	10.6442
Q9DBD5	Proline-, glutamic acid- and leucine-rich protein 1 (Modulator of non-genomic activity of estrogen receptor)	PELP1	BRAIN	REGULATED	up	-1.60908	-6.89941	-1.38346	-1.79671	-2.80176	-1.77787	-7.5526	-1.05542	-7.98034	-0.62522	-0.507754	-0.632285
Q61474	RNA-binding protein Musashi homolog 1 (Musashi-1)	MSI1	BRAIN	REGULATED	up	-3.2528	-5.75801	-2.49149	-2.1258	-2.5391	-2.42256	-2.42344	-2.34732	-2.25777	-1.69344	-1.62024	-1.51027
Q64478	Histone H2B type 1-H (h2B-221)	HIST1H2BH	BRAIN	REGULATED	up	8.4912	8.54215	8.68622	10.219	10.1155	10.2102	9.469	10.0229	10.0711	10.3095	10.2886	10.1607
Q3TDN2	FAS-associated factor 2 (UBX domain-containing protein 8)	FAF2	BRAIN	REGULATED	up	-1.16372	-19.3489	-0.71662	-0.450259	-1.02257	-1.06219	-7.12101	-0.793603	-6.33728	-0.630779	-0.466012	-0.790737
Q8BH59	Calcium-binding mitochondrial carrier protein Aralar1 (Mitochondrial aspartate glutamate carrier 1) (Solute carrier family 25 member 12)	SLC25A12	BRAIN	REGULATED	up	-0.194308	-0.443005	0.138662	0.933631	0.765156	0.836132	0.184911	0.504786	0.345998	1.60668	1.52963	1.54672
P84228	Histone H3.2	HIST1H3B; HIST1H3C; HIST1H3D; HIST1H3E; HIST1H3F; HIST2H3B; HIST2H3C1; HIST2H3C2	BRAIN	REGULATED	up	-1.97635	-5.57303	-1.04614	-0.207417	-0.372028	-0.268586	-0.0768471	-1.81555	-0.258149	-0.424716	-0.474479	-0.357529
Q922P9	Putative oxidoreductase GLYR1 (EC 1.-.-.-) (Glyoxylate reductase 1 homolog) (Nuclear protein NP60)	GLYR1	BRAIN	REGULATED	up	0.470499	0.387571	0.642245	2.15123	2.05429	2.03676	1.74403	1.87312	1.75904	2.15068	2.12157	2.17289
Q8VHN7	G-protein coupled receptor 98 (Monogenic audiogenic seizure susceptibility protein 1) (Neurepin) (Very large G-protein coupled receptor 1)	GPR98	BRAIN	REGULATED	up	-1.52798	-1.53435	-1.09473	0.320525	0.19549	0.241853	0.154895	0.192634	0.128451	0.205227	0.435135	0.126552
Q9QZQ8	Core histone macro-H2A.1 (Histone macroH2A1) (mH2A1) (H2A.y) (H2A/y)	H2AFY	BRAIN	REGULATED	up	4.96247	5.02443	5.12493	6.52092	6.68802	6.96527	6.34332	6.21393	6.22951	6.61526	6.61796	6.60962
P55200	Histone-lysine N-methyltransferase 2A (Lysine N-methyltransferase 2A) (EC 2.1.1.43) (ALL-1) (Myeloid/lymphoid or mixed-lineage leukemia) (Myeloid/lymphoid or mixed-lineage leukemia protein 1) (Zinc finger protein HRX) [Cleaved into: MLL cleavage product N320 (N-terminal cleavage product of 320 kDa) (p320); MLL cleavage product C180 (C-terminal cleavage product of 180 kDa) (p180)]	KMT2A	BRAIN	REGULATED	up	-4.18284	-3.81336	-3.7696	-2.27499	-2.12371	-2.07461	-2.4614	-2.56392	-2.52397	-2.26818	-2.32179	-2.45503
Q9D0M3	Cytochrome c1, heme protein, mitochondrial (Complex III subunit 4) (Complex III subunit IV) (Cytochrome b-c1 complex subunit 4) (Ubiquinol-cytochrome-c reductase complex cytochrome c1 subunit) (Cytochrome c-1)	CYC1	BRAIN	REGULATED	up	0.158057	0.0855326	0.196162	1.0501	1.09063	1.07981	0.883656	0.995564	1.01069	1.67471	1.76086	1.67369
Q9Z277	Tyrosine-protein kinase BAZ1B (EC 2.7.10.2) (Bromodomain adjacent to zinc finger domain protein 1B) (Williams syndrome transcription factor homolog) (Williams-Beuren syndrome chromosomal region 9 protein homolog)	BAZ1B	BRAIN	REGULATED	up	-1.60296	-1.60443	-1.49293	-0.0967415	-0.137074	-0.0801377	-0.370557	-0.358895	-0.172332	-0.00146321	-0.0118651	-0.0692597
Q8CAK3	Repressor of yield of DENV protein homolog (RyDEN)	RYDEN	BRAIN	REGULATED	up	-7.4255	-6.61217	-6.87687	-5.17047	-9.54124	-5.64053	-8.05864	-5.7906	-7.38412	-6.79992	-4.49522	-4.50272
Q8R1I1	Cytochrome b-c1 complex subunit 9 (Complex III subunit 9) (Complex III subunit X) (Cytochrome c1 non-heme 7 kDa protein) (Ubiquinol-cytochrome c reductase complex 7.2 kDa protein)	UQCR10	BRAIN	REGULATED	up	-0.989313	-1.05246	-1.15226	-0.154136	-0.0951185	-0.0490105	-0.343358	-0.235883	-0.114261	0.436313	0.447195	0.454185
Q64522	Histone H2A type 2-B (H2a-613A)	HIST2H2AB	BRAIN	REGULATED	up	7.27411	7.03053	7.30852	8.79953	8.71411	8.77266	8.11038	8.59571	8.26192	8.75365	8.79308	8.68886
Q9DCJ5	NADH dehydrogenase [ubiquinone] 1 alpha subcomplex subunit 8 (Complex I-19kD) (CI-19kD) (Complex I-PGIV) (CI-PGIV) (NADH-ubiquinone oxidoreductase 19 kDa subunit)	NDUFA8	BRAIN	REGULATED	up	-0.583605	-0.615714	-0.364479	0.360698	0.389681	0.549801	0.233819	0.267379	0.271588	1.00067	0.965501	0.894083
Q8CH09	SURP and G-patch domain-containing protein 2 (Arginine/serine-rich-splicing factor 14) (Splicing factor, arginine/serine-rich 14)	SUGP2	BRAIN	REGULATED	up	-2.52774	-2.7484	-2.59219	-1.53366	-1.53655	-1.87291	-1.50877	-1.37565	-1.41483	-1.11543	-1.0836	-1.31563
Q921G7	Electron transfer flavoprotein-ubiquinone oxidoreductase, mitochondrial (ETF-QO) (ETF-ubiquinone oxidoreductase) (EC 1.5.5.1) (Electron-transferring-flavoprotein dehydrogenase) (ETF dehydrogenase)	ETFDH	BRAIN	REGULATED	up	-1.53394	-1.6637	-0.837993	-0.526475	-1.01854	-1.04653	-0.613441	-0.440073	-0.351537	0.259163	0.293605	0.0264412
Q8BTX9	Inactive hydroxysteroid dehydrogenase-like protein 1	HSDL1	BRAIN	REGULATED	up	-1.81941	-0.657556	-0.79315	0.862418	0.108494	0.0314565	-2.55378	0.143768	-0.81086	0.515872	0.220186	0.238249
P43276	Histone H1.5 (H1 VAR.5) (H1b)	HIST1H1B	BRAIN	REGULATED	up	2.34751	2.12933	2.27881	4.51647	4.42167	4.44339	3.67965	3.79157	3.7538	3.6625	3.7951	3.57744
Q9DB77	Cytochrome b-c1 complex subunit 2, mitochondrial (Complex III subunit 2) (Core protein II) (Ubiquinol-cytochrome-c reductase complex core protein 2)	UQCRC2	BRAIN	REGULATED	up	0.634089	0.668522	0.889791	1.65062	1.68984	1.59537	1.55359	1.47554	1.48124	2.1622	2.21002	2.14952
Q8VD12	Zinc finger protein 385A (Hematopoietic zinc finger protein)	ZNF385A	BRAIN	REGULATED	up	-6.00258	-4.91412	-4.76542	-3.74944	-3.65915	-3.93802	-3.88305	-3.85042	-4.26635	-4.06694	-3.58531	-3.71536
P0C0S6	Histone H2A.Z (H2A/z)	H2AFZ	BRAIN	REGULATED	up	4.44183	4.3477	4.52823	6.25044	5.97242	6.19284	5.47439	5.59068	5.66187	5.92594	5.90359	5.75776
P97367	Homeobox protein Meis2 (Meis1-related protein 1)	MEIS2	BRAIN	REGULATED	up	-2.01258	-3.25167	-1.73405	-0.787681	-0.943706	-0.875924	-1.96621	-1.25488	-0.743946	-0.703158	-0.805324	-0.719371
Q9D3D9	ATP synthase subunit delta, mitochondrial (F-ATPase delta subunit)	ATP5D	BRAIN	REGULATED	up	2.13501	1.50872	2.71906	4.02773	3.62723	3.61291	1.03158	3.01716	1.5975	3.58528	3.63507	3.82934
Q9CQZ5	NADH dehydrogenase [ubiquinone] 1 alpha subcomplex subunit 6 (Complex I-B14) (CI-B14) (NADH-ubiquinone oxidoreductase B14 subunit)	NDUFA6	BRAIN	REGULATED	up	-0.883596	-0.854234	-0.788699	-0.66667	-0.772055	-0.618856	-0.517983	-0.33462	-0.414032	0.541147	0.718289	0.347789
P19324	Serpin H1 (47 kDa heat shock protein) (Collagen-binding protein) (Colligin) (Serine protease inhibitor J6)	SERPINH1	BRAIN	REGULATED	up	-2.11059	-8.25002	-1.61604	-1.04136	-1.93873	-1.1535	-9.33206	-1.53828	-7.42777	-1.36715	-1.37773	-1.42189
P02301	Histone H3.3C (Embryonic)	H3F3C	BRAIN	REGULATED	up	5.19797	4.98271	5.24947	6.25089	6.17452	6.30527	6.41068	6.43043	6.53098	6.62486	6.6213	6.40519
P27661	Histone H2AX (H2a/x) (Histone H2A.X)	H2AFX	BRAIN	REGULATED	up	-7.77896	-9.3426	-7.59388	-6.40627	-8.48239	-6.67006	-6.10885	-4.46964	-5.41858	-6.4108	-6.72275	-6.77863
Q9CZ13	Cytochrome b-c1 complex subunit 1, mitochondrial (Complex III subunit 1) (Core protein I) (Ubiquinol-cytochrome-c reductase complex core protein 1)	UQCRC1	BRAIN	REGULATED	up	1.23798	1.34348	1.52768	2.37559	2.73112	2.40596	1.97956	2.12901	1.97329	2.75769	2.79122	2.7086
Q9CRB2	H/ACA ribonucleoprotein complex subunit 2 (Nucleolar protein family A member 2) (snoRNP protein NHP2)	NHP2	BRAIN	REGULATED	up	-1.78574	-1.81136	-1.67327	-0.834448	-1.01063	-0.658643	-0.408496	-0.48436	-0.498702	-0.364925	-0.315983	-0.472991
P01872	Ig mu chain C region	IGHM	BRAIN	REGULATED	up	-2.09867	-2.06751	-2.08527	-1.14859	-1.31149	-1.1994	0.0852066	0.251442	0.1247	0.501071	0.548388	0.443438
P52503	NADH dehydrogenase [ubiquinone] iron-sulfur protein 6, mitochondrial (Complex I-13kD-A) (CI-13kD-A) (NADH-ubiquinone oxidoreductase 13 kDa-A subunit)	NDUFS6	BRAIN	REGULATED	up	-1.66503	-1.68075	-1.6142	-1.07816	-1.13431	-0.926117	-0.680543	-0.693331	-0.700098	-0.25638	-0.347256	-0.210868
Q7TMF3	NADH dehydrogenase [ubiquinone] 1 alpha subcomplex subunit 12 (Complex I-B17.2) (CI-B17.2) (CIB17.2) (NADH-ubiquinone oxidoreductase subunit B17.2)	NDUFA12	BRAIN	REGULATED	up	-2.849	-3.41793	-2.6463	-1.86281	-2.05768	-2.05013	-2.16364	-2.31028	-1.88878	-1.26944	-1.42053	-1.98498
P28235	Gap junction alpha-4 protein (Connexin-37) (Cx37)	GJA4	BRAIN	REGULATED	up	-2.68629	-2.61806	-2.71639	-1.75289	-1.96258	-1.94609	-1.73451	-1.73726	-1.6555	-1.37765	-1.28896	-1.31807
Q99JX7	Nuclear RNA export factor 1 (Tip-associated protein) (Tip-associating protein) (mRNA export factor TAP)	NXF1	BRAIN	REGULATED	up	-2.6214	-2.89574	-2.31932	-1.41278	-1.30784	-1.28	-2.14929	-1.70779	-1.24956	-1.39061	-0.768528	-1.59157
Q9CR68	Cytochrome b-c1 complex subunit Rieske, mitochondrial (EC 1.10.2.2) (Complex III subunit 5) (Cytochrome b-c1 complex subunit 5) (Rieske iron-sulfur protein) (RISP) (Ubiquinol-cytochrome c reductase iron-sulfur subunit) [Cleaved into: Cytochrome b-c1 complex subunit 11 (Complex III subunit IX) (Ubiquinol-cytochrome c reductase 8 kDa protein)]	UQCRFS1	BRAIN	REGULATED	up	1.36806	0.817754	1.74495	2.40325	2.50186	2.34988	1.70061	2.01338	1.85488	2.69109	2.83156	2.65478
B1AZI6	THO complex subunit 2 (Tho2)	THOC2	BRAIN	REGULATED	up	-2.11123	-1.80043	-2.06293	-1.38823	-0.995227	-0.951686	-1.37418	-0.814709	-0.646287	-0.577956	-0.791725	-0.757217
P62806	Histone H4	HIST1H4A; HIST1H4B; HIST1H4C; HIST1H4D; HIST1H4F; HIST1H4H; HIST1H4I; HIST1H4J; HIST1H4K; HIST1H4M; HIST2H4A; HIST4H4	BRAIN	REGULATED	up	7.009	7.07654	7.14703	8.13273	8.16897	8.22944	8.04611	8.07964	8.092	8.38993	8.39948	8.37883
P12787	Cytochrome c oxidase subunit 5A, mitochondrial (Cytochrome c oxidase polypeptide Va)	COX5A	BRAIN	REGULATED	up	1.9333	1.44828	2.01207	2.88247	3.18363	3.111	2.31077	2.78953	2.46621	3.25413	3.1756	3.0745
Q9CQ25	Mitotic-spindle organizing protein 2 (Mitotic-spindle organizing protein associated with a ring of gamma-tubulin 2B)	MZT2	BRAIN	REGULATED	up	-4.4709	-12.4277	-3.60473	-2.68876	-4.09334	-3.32239	-10.1628	-4.03655	-8.85278	-3.87374	-3.61025	-4.34454
Q62422	Osteoclast-stimulating factor 1 (SH3 domain protein 3)	OSTF1	BRAIN	REGULATED	up	-2.78702	-10.2352	-2.50627	-2.66687	-2.75806	-2.60347	-13.0162	-2.78246	-4.05433	-2.49768	-2.29149	-2.46529
Q8VEM8	Phosphate carrier protein, mitochondrial (Phosphate transport protein) (PTP) (Solute carrier family 25 member 3)	SLC25A3	BRAIN	REGULATED	up	1.28292	1.03503	1.23535	1.7412	1.69797	1.79219	1.66065	1.77371	1.81725	2.52707	2.59758	2.329
Q60932	Voltage-dependent anion-selective channel protein 1 (VDAC-1) (mVDAC1) (Outer mitochondrial membrane protein porin 1) (Plasmalemmal porin) (Voltage-dependent anion-selective channel protein 5) (VDAC-5) (mVDAC5)	VDAC1	BRAIN	REGULATED	up	1.16817	0.941277	1.08774	1.83976	1.66126	1.95198	1.85289	1.69456	1.78589	2.3837	2.43675	2.28879
Q8R480	Nuclear pore complex protein Nup85 (85 kDa nucleoporin) (FROUNT) (Nucleoporin Nup85) (Pericentrin-1)	NUP85	BRAIN	REGULATED	up	-4.63621	-8.65268	-3.93488	-3.88835	-4.75409	-3.85216	-8.60534	-4.29931	-8.04236	-3.95364	-3.49339	-3.30122
Q9Z2D6	Methyl-CpG-binding protein 2 (MeCp-2 protein) (MeCp2)	MECP2	BRAIN	REGULATED	up	4.4719	4.41271	4.53395	5.58213	5.60111	5.57767	5.69969	5.68962	5.67788	5.78026	5.7852	5.68001
Q9D3E6	Cohesin subunit SA-1 (SCC3 homolog 1) (Stromal antigen 1)	STAG1	BRAIN	REGULATED	up	-3.1817	-3.11951	-2.67113	-1.09541	-1.58843	-1.43401	-2.13668	-1.95298	-2.27569	-1.73134	-1.6676	-1.70095
Q91YT0	NADH dehydrogenase [ubiquinone] flavoprotein 1, mitochondrial (EC 1.6.5.3) (EC 1.6.99.3) (Complex I-51kD) (CI-51kD) (NADH-ubiquinone oxidoreductase 51 kDa subunit)	NDUFV1	BRAIN	REGULATED	up	-0.110534	0.0129574	0.102768	0.584597	0.723958	0.600251	0.113974	0.621215	0.772382	1.22454	1.45553	1.09547
P56564	Excitatory amino acid transporter 1 (Glial high affinity glutamate transporter) (High-affinity neuronal glutamate transporter) (Sodium-dependent glutamate/aspartate transporter 1) (GLAST-1) (Solute carrier family 1 member 3)	SLC1A3	BRAIN	REGULATED	up	1.65774	0.580623	1.84698	2.25953	2.18645	2.19308	0.663171	1.97662	0.713904	2.76887	2.87936	2.68662
A4Q9F3	Protein polyglycylase TTLL10 (EC 6.3.2.-) (Tubulin--tyrosine ligase-like protein 10)	TTLL10	BRAIN	REGULATED	up	-3.36864	-5.08054	-3.5275	-2.22114	-3.34697	-2.99621	-3.27769	-2.31801	-2.19167	-2.86741	-1.95862	-2.75919
P43024	Cytochrome c oxidase subunit 6A1, mitochondrial (Cytochrome c oxidase polypeptide VIa-liver)	COX6A1	BRAIN	REGULATED	up	-1.35836	-1.46756	-1.12263	0.611614	0.441296	0.296871	-0.624465	-0.829786	-0.892465	0.0419941	-0.0382553	-0.144912
Q9CQQ7	ATP synthase F(0) complex subunit B1, mitochondrial (ATP synthase subunit b) (ATPase subunit b)	ATP5F1	BRAIN	REGULATED	up	1.21315	0.609173	1.61493	2.45301	2.3346	2.33459	1.36906	2.01131	1.41744	2.49602	2.55	2.41768
Q9D024	Coiled-coil domain-containing protein 47 (Adipocyte-specific protein 4)	CCDC47	BRAIN	REGULATED	up	-3.23319	-5.879	-1.9458	-2.13297	-3.04855	-2.15503	-5.65309	-2.61527	-2.7952	-1.88633	-1.69344	-1.79937
Q60930	Voltage-dependent anion-selective channel protein 2 (VDAC-2) (mVDAC2) (Outer mitochondrial membrane protein porin 2) (Voltage-dependent anion-selective channel protein 6) (VDAC-6) (mVDAC6)	VDAC2	BRAIN	REGULATED	up	-0.43922	-0.469651	-0.451766	0.0411248	-0.0878349	-0.00281652	0.186996	0.236268	0.0667699	0.847413	0.785999	0.737688
Q8CCK0	Core histone macro-H2A.2 (Histone macroH2A2) (mH2A2)	H2AFY2	BRAIN	REGULATED	up	3.09856	3.11475	3.20766	4.22864	4.12758	4.09445	3.97209	3.96002	4.04212	4.43997	4.36885	4.27639
Q9DCX2	ATP synthase subunit d, mitochondrial (ATPase subunit d)	ATP5H	BRAIN	REGULATED	up	2.62166	2.36079	2.93685	3.64369	3.55935	3.57235	3.01192	3.34284	2.99128	3.91181	3.89498	3.85506
Q61207	Prosaposin (Sulfated glycoprotein 1) (SGP-1) [Cleaved into: Saposin-A; Saposin-B-Val; Saposin-B; Saposin-C; Saposin-D]	PSAP	BRAIN	REGULATED	up	2.86623	1.6125	3.19357	2.75515	2.69128	2.72968	1.90168	2.94988	1.71797	3.79945	4.06388	4.01614
Q99LY9	NADH dehydrogenase [ubiquinone] iron-sulfur protein 5 (Complex I-15 kDa) (CI-15 kDa) (NADH-ubiquinone oxidoreductase 15 kDa subunit) [Cleaved into: NADH dehydrogenase [ubiquinone] iron-sulfur protein 5, N-terminally processed]	NDUFS5	BRAIN	REGULATED	up	-1.92312	-2.08412	-1.83071	-1.24272	-1.16877	-1.30296	-1.58449	-1.40208	-1.32348	-0.626661	-0.76344	-0.725286
P56380	Bis(5'-nucleosyl)-tetraphosphatase [asymmetrical] (EC 3.6.1.17) (Diadenosine 5',5'''-P1,P4-tetraphosphate asymmetrical hydrolase) (Ap4A hydrolase) (Ap4Aase) (Diadenosine tetraphosphatase) (Nucleoside diphosphate-linked moiety X motif 2) (Nudix motif 2)	NUDT2	BRAIN	REGULATED	up	-1.27404	-3.60901	-2.008	-0.825203	-0.907102	-2.00223	-1.54642	-0.708047	-1.17135	-0.894511	-0.613882	-0.946661
Q8CF93	Polypeptide N-acetylgalactosaminyltransferase 13 (EC 2.4.1.41) (Polypeptide GalNAc transferase 13) (GalNAc-T13) (pp-GaNTase 13) (Protein-UDP acetylgalactosaminyltransferase 13) (UDP-GalNAc:polypeptide N-acetylgalactosaminyltransferase 13)	GALNT13	BRAIN	REGULATED	up	1.89621	1.76997	1.89054	3.05499	3.01385	3.18801	2.87353	3.16447	3.11076	3.1325	3.05729	3.01887
Q91WS0	CDGSH iron-sulfur domain-containing protein 1 (MitoNEET)	CISD1	BRAIN	REGULATED	up	-2.5467	-2.63751	-2.42754	-2.03649	-2.04544	-2.00973	-2.12874	-1.91106	-1.93737	-1.4943	-1.20664	-1.28411
Q5SS00	DBF4-type zinc finger-containing protein 2 homolog	ZDBF2	BRAIN	REGULATED	up	2.02275	1.92909	2.02786	2.6672	2.61888	2.66076	3.27247	3.44715	3.34953	3.12596	3.30965	3.11763
Q06185	ATP synthase subunit e, mitochondrial (ATPase subunit e)	ATP5I	BRAIN	REGULATED	up	1.63052	1.54944	1.74883	2.623	2.55151	2.57478	2.44744	2.38035	2.39654	2.86986	2.89722	2.71321
Q99PG4	Regulator of G-protein signaling 18 (RGS18)	RGS18	BRAIN	REGULATED	up	-1.05671	-1.15635	-1.12375	-0.0119604	-0.0631624	-0.0037827	-0.390743	-0.375702	-0.341557	0.0872273	0.104444	7.83511e-05
P48771	Cytochrome c oxidase subunit 7A2, mitochondrial (Cytochrome c oxidase subunit VIIa-liver/heart) (Cytochrome c oxidase subunit VIIa-L)	COX7A2	BRAIN	REGULATED	up	-0.110121	-0.176953	-0.0186968	0.846146	0.815706	0.680131	0.506938	0.282035	0.339577	1.1337	0.983653	1.12496
Q922Q1	Mitochondrial amidoxime reducing component 2 (mARC2) (EC 1.-.-.-) (Molybdenum cofactor sulfurase C-terminal domain-containing protein 2) (MOSC domain-containing protein 2) (Moco sulfurase C-terminal domain-containing protein 2)	MARC2	BRAIN	REGULATED	up	-1.75185	-2.02988	-1.69732	-1.21171	-1.20807	-1.16235	-1.62145	-1.35578	-1.14649	-0.727505	-0.572145	-0.621778
Q9DC70	NADH dehydrogenase [ubiquinone] iron-sulfur protein 7, mitochondrial (EC 1.6.5.3) (EC 1.6.99.3) (Complex I-20kD) (CI-20kD) (NADH-ubiquinone oxidoreductase 20 kDa subunit)	NDUFS7	BRAIN	REGULATED	up	-2.45243	-2.60242	-2.47599	-2.21923	-2.11562	-1.97496	-2.12493	-1.93492	-2.01718	-1.35414	-1.38213	-1.29852
P51881	ADP/ATP translocase 2 (ADP,ATP carrier protein 2) (Adenine nucleotide translocator 2) (ANT 2) (Solute carrier family 25 member 5) [Cleaved into: ADP/ATP translocase 2, N-terminally processed]	SLC25A5	BRAIN	REGULATED	up	0.469111	0.510726	0.748808	1.20442	0.973262	1.10146	1.03476	1.10913	0.978931	1.73669	1.75441	1.68991
Q9Z0X1	Apoptosis-inducing factor 1, mitochondrial (EC 1.1.1.-) (Programmed cell death protein 8)	AIFM1	BRAIN	REGULATED	up	-0.489941	-0.355869	-0.876085	0.552751	0.512538	0.347246	0.0986002	0.479287	0.273068	0.538121	0.58747	0.541476
Q8K2B3	Succinate dehydrogenase [ubiquinone] flavoprotein subunit, mitochondrial (EC 1.3.5.1) (Flavoprotein subunit of complex II) (Fp)	SDHA	BRAIN	REGULATED	up	1.69788	1.02696	2.19918	2.87319	2.71974	2.90223	0.962743	2.31803	1.02427	2.87503	3.01297	2.7753
Q3V132	ADP/ATP translocase 4 (ADP,ATP carrier protein 4) (Adenine nucleotide translocator 4) (ANT 4) (Solute carrier family 25 member 31) (Sperm flagellar energy carrier protein)	SLC25A31	BRAIN	REGULATED	up	0.687832	0.587541	0.858635	1.30815	1.23712	1.16109	1.18487	1.32147	1.30867	1.87954	1.86294	1.85779
Q62425	Cytochrome c oxidase subunit NDUFA4	NDUFA4	BRAIN	REGULATED	up	-0.336751	-0.360332	-0.437803	0.336065	0.270267	0.226752	0.0941992	0.0355803	0.118542	0.777912	0.710348	0.816972
Q9D964	Glycine amidinotransferase, mitochondrial (EC 2.1.4.1) (L-arginine:glycine amidinotransferase) (Transamidinase)	GATM	BRAIN	REGULATED	up	-0.693137	-0.821272	-0.535432	-0.234563	-0.0976441	-0.212509	-0.572138	-0.217899	0.343687	0.36242	0.87526	0.0895279
P56382	ATP synthase subunit epsilon, mitochondrial (ATPase subunit epsilon)	ATP5E	BRAIN	REGULATED	up	-0.476539	-0.53075	-0.370881	0.977379	0.906364	1.03528	0.27658	0.432477	0.395532	0.657802	0.710297	0.613094
Q8BVI5	Syntaxin-16	STX16	BRAIN	REGULATED	up	-2.29079	-6.16175	-1.48378	-1.53913	-1.7027	-1.77563	-3.81239	-2.02526	-2.80451	-1.42658	-1.43738	-1.06615
P19536	Cytochrome c oxidase subunit 5B, mitochondrial (Cytochrome c oxidase polypeptide Vb)	COX5B	BRAIN	REGULATED	up	0.196388	-0.105322	0.264168	1.54848	1.35836	1.39866	0.726891	0.891226	0.701719	1.33238	1.29092	1.12621
O55237	CD70 antigen (CD27 ligand) (CD27-L) (Tumor necrosis factor ligand superfamily member 7) (CD antigen CD70)	CD70	BRAIN	REGULATED	down	-3.77988	-4.81245	-3.52998	-4.15823	-4.35245	-4.04957	-5.83631	-4.57894	-10.3465	-4.716	-4.98742	-5.53132
Q9CZM2	60S ribosomal protein L15	RPL15	BRAIN	REGULATED	down	-0.917821	-1.02168	-0.803439	-6.58658	-6.4169	-6.50271	-6.36254	-6.63845	-6.24852	-7.04333	-6.74967	-5.87738
P19253	60S ribosomal protein L13a (Transplantation antigen P198) (Tum-P198 antigen)	RPL13A	BRAIN	REGULATED	down	-1.2094	-1.28243	-1.21481	-6.46554	-7.04971	-7.6966	-8.5952	-4.5338	-7.03958	-6.74074	-6.47279	-6.39738
Q5DTM8	E3 ubiquitin-protein ligase BRE1A (RING-type E3 ubiquitin transferase RNF20)	RNF20	BRAIN	REGULATED	down	-0.479058	-0.347654	-0.310675	-4.6099	-4.42372	-4.39921	-5.08078	-4.7488	-4.94682	-4.96461	-4.78037	-5.07142
P35980	60S ribosomal protein L18	RPL18	BRAIN	REGULATED	down	-0.103941	-0.205774	-0.107925	-4.67179	-4.78169	-4.86643	-4.90887	-5.16526	-5.09786	-4.39244	-4.0661	-4.6084
P12970	60S ribosomal protein L7a (Surfeit locus protein 3)	RPL7A	BRAIN	REGULATED	down	0.420748	0.549832	0.598725	-3.71112	-4.29895	-3.69883	-3.94376	-3.73857	-4.02142	-3.52739	-3.68308	-3.68574
Q9D8E6	60S ribosomal protein L4	RPL4	BRAIN	REGULATED	down	-0.246062	-0.228337	-0.0631662	-4.83178	-4.49094	-4.80897	-4.4159	-4.42258	-4.26202	-3.98992	-4.47	-4.24746
P41105	60S ribosomal protein L28	RPL28	BRAIN	REGULATED	down	-4.97458	-5.12267	-4.91023	-9.08734	-8.6264	-8.70069	-6.85951	-8.58819	-12.6461	-8.86707	-9.10241	-9.27412
P47911	60S ribosomal protein L6 (TAX-responsive enhancer element-binding protein 107) (TAXREB107)	RPL6	BRAIN	REGULATED	down	0.126019	0.0500594	0.207364	-3.32513	-3.73647	-3.76664	-3.61244	-4.21343	-3.92412	-3.58755	-3.61308	-4.1509
P14148	60S ribosomal protein L7	RPL7	BRAIN	REGULATED	down	0.400191	-0.51056	0.725851	-3.04395	-2.74302	-2.92992	-4.55271	-3.90747	-3.74544	-3.56745	-3.55636	-2.91049
Q8BM85	TBC domain-containing protein kinase-like protein	TBCK	BRAIN	REGULATED	down	-2.48801	-2.38402	-2.45285	-3.89738	-4.39611	-2.9718		-5.27165	-4.91253	-5.95195	-7.53973	-4.96866
Q9CR57	60S ribosomal protein L14	RPL14	BRAIN	REGULATED	down	0.0681307	-0.00735319	0.208436	-3.50084	-3.66902	-3.04789	-4.16275	-4.03664	-4.24742	-3.80836	-3.63694	-3.57288
P70697	Uroporphyrinogen decarboxylase (UPD) (URO-D) (EC 4.1.1.37)	UROD	BRAIN	REGULATED	down	-4.27037	-4.00664	-3.48738	-4.75787	-6.33862	-5.28446	-4.93679	-8.17144	-4.9606	-6.05342	-9.91372	-5.24471
O70496	H(+)/Cl(-) exchange transporter 7 (Chloride channel 7 alpha subunit) (Chloride channel protein 7) (ClC-7)	CLCN7	BRAIN	REGULATED	down	-2.79857	-2.69306	-2.62585	-4.01185	-4.67314	-4.99251	-4.71601	-5.32393	-6.50513	-5.46202	-6.69983	-6.10695
P62911	60S ribosomal protein L32	RPL32	BRAIN	REGULATED	down	-1.00299	-1.45388	-1.15952	-3.34822	-3.73204	-3.89747	-3.32114	-4.04513	-3.29438	-4.05634	-4.60402	-4.40624
P62918	60S ribosomal protein L8	RPL8	BRAIN	REGULATED	down	0.00847978	-0.0807735	0.0342168	-3.36972	-3.37763	-3.2779	-3.58857	-3.21517	-3.35353	-3.02116	-2.90559	-3.12656
P27659	60S ribosomal protein L3 (J1 protein)	RPL3	BRAIN	REGULATED	down	0.655613	0.389549	0.500742	-2.20741	-2.55308	-2.25865	-2.61425	-2.51653	-2.54818	-2.40495	-2.31868	-2.37993
O55142	60S ribosomal protein L35a	RPL35A	BRAIN	REGULATED	down	-0.425029	-0.352833	-0.229196	-2.70124	-3.45013	-2.67407	-4.59342	-4.62625	-3.70075	-2.91037	-3.26633	-3.73466
O09167	60S ribosomal protein L21	RPL21	BRAIN	REGULATED	down	-4.33645	-5.93811	-4.36169	-7.31118	-7.28292	-6.8042	-8.43844	-7.48812	-7.98606	-7.12222	-7.35079	-8.37635
Q8K019	Bcl-2-associated transcription factor 1 (Btf)	BCLAF1	BRAIN	REGULATED	down	-2.15414	-2.38993	-2.0963	-3.32622	-3.65462	-3.20637	-4.18732	-3.92393	-3.84544	-4.19577	-4.40128	-4.85415
P47962	60S ribosomal protein L5	RPL5	BRAIN	REGULATED	down	0.203882	-0.0316483	0.19226	-1.87885	-2.18342	-2.04732	-1.65799	-2.02272	-1.69472	-1.92517	-2.33301	-2.00765
P14115	60S ribosomal protein L27a (L29)	RPL27A	BRAIN	REGULATED	down	0.255116	0.301759	0.398378	-1.58162	-1.5935	-1.72871	-2.12844	-1.92396	-2.07543	-1.6946	-1.77742	-1.70666
P47963	60S ribosomal protein L13 (A52)	RPL13	BRAIN	REGULATED	down	-0.0625367	0.0268981	0.18788	-1.78124	-1.82961	-1.81975	-1.69793	-1.49185	-1.61554	-1.60669	-1.67233	-1.82231
Q569Z6	Thyroid hormone receptor-associated protein 3 (Thyroid hormone receptor-associated protein complex 150 kDa component) (Trap150)	THRAP3	BRAIN	REGULATED	down	-0.264239	-0.441247	-0.215365	-1.21316	-1.28581	-1.07199	-1.60531	-1.41915	-1.76247	-1.85383	-2.07886	-2.19825
P84099	60S ribosomal protein L19	RPL19	BRAIN	REGULATED	down	0.709417	0.785883	0.859316	-1.12227	-1.18278	-1.21999	-1.17488	-1.11003	-1.05347	-1.01466	-0.859194	-0.869735
Q3TLI0	Trafficking protein particle complex subunit 10 (Trafficking protein particle complex subunit TMEM1) (Transport protein particle subunit TMEM1) (TRAPP subunit TMEM1)	TRAPPC10	BRAIN	REGULATED	down	-4.80016	-0.195164	-5.12094			-6.31539	-6.46316	-9.0341	-5.21961	-7.65516	-5.17391	-6.29587
P62242	40S ribosomal protein S8	RPS8	BRAIN	REGULATED	down	2.65712	2.5296	2.75015	1.08572	0.996385	1.05521	0.719826	0.629172	0.783947	1.04987	1.05181	0.836064
Q99NF2	NMDA receptor synaptonuclear signaling and neuronal migration factor (Juxtasynaptic attractor of caldendrin on dendritic boutons protein) (Jacob protein) (Nasal embryonic luteinizing hormone-releasing hormone factor) (Nasal embryonic LHRH factor)	NSMF	BRAIN	REGULATED	down	-0.365272	-0.352498	-0.105279	-1.84617	-1.7005	-1.15105	-2.03405	-2.72683	-2.21512	-1.87665	-2.19273	-1.88251
O35855	Branched-chain-amino-acid aminotransferase, mitochondrial (BCAT(m)) (EC 2.6.1.42)	BCAT2	BRAIN	REGULATED	down	-1.51488	-1.58133	-1.69998	-2.60866	-2.48924	-1.85912	-4.16247	-3.82341	-3.68929	-3.3009	-3.18414	-3.28458
Q9JKD3	Secretory carrier-associated membrane protein 5 (Secretory carrier membrane protein 5)	SCAMP5	BRAIN	REGULATED	down	-1.3815	-1.55961	-1.04028	-2.59222	-3.14769	-2.59854	-2.67132	-2.7512	-1.93056	-2.48217	-3.24945	-3.4331
O70566	Protein diaphanous homolog 2 (Diaphanous-related formin-2) (DRF2) (mDia3)	DIAPH2	BRAIN	REGULATED	down	-2.84624	-2.40734	-2.37365	-4.14612	-3.72502	-4.20517	-6.82263	-4.49996	-4.46586	-3.87276	-4.55	-4.27553
P47915	60S ribosomal protein L29	RPL29	BRAIN	REGULATED	down	0.0833506	-0.289087	-0.0218309	-1.30633	-1.485	-1.14311	-1.63171	-1.37318	-1.3314	-1.51833	-1.69052	-1.96195
P14131	40S ribosomal protein S16	RPS16	BRAIN	REGULATED	down	2.21119	2.1402	2.28818	0.563658	0.512695	0.612664	0.486148	0.409449	0.481779	0.699013	0.694147	0.582422
P35979	60S ribosomal protein L12	RPL12	BRAIN	REGULATED	down	1.04707	0.932082	1.07224	-0.342797	-0.313978	-0.176469	-0.424943	-0.273889	-0.15727	-0.464859	-0.514389	-0.609853
Q9D6N5	Dr1-associated corepressor (Dr1-associated protein 1) (Negative cofactor 2-alpha) (NC2-alpha)	DRAP1	BRAIN	REGULATED	down	-0.624308	-0.205035	-0.733488	-0.631653	0.235746	-0.0236264	-1.99133	-1.41039	-2.38739	-1.9383	-2.01933	-2.30074
Q00898	Alpha-1-antitrypsin 1-5 (Alpha-1 protease inhibitor 5) (Serine protease inhibitor 1-5) (Serine protease inhibitor A1e) (Serpin A1e)	SERPINA1E	BRAIN	REGULATED	down	-1.48056	-1.52075	-1.39567	-2.64116	-2.38743	-2.33081	-3.00887	-2.64284	-2.88942	-3.11875	-2.87347	-2.94952
P62274	40S ribosomal protein S29	RPS29	BRAIN	REGULATED	down	0.812644	0.737068	1.12304	-0.119232	-0.327688	-0.130629	-0.584673	-0.339437	-0.288468	-0.517958	-0.619218	-0.578523
E9Q414	Apolipoprotein B-100 (Apo B-100) [Cleaved into: Apolipoprotein B-48 (Apo B-48)]	APOB	BRAIN	REGULATED	down	-2.09924	-1.99526	-1.94199	-3.37562	-3.33487	-3.33817	-3.5152	-3.19712	-3.51625	-3.41694	-3.43405	-3.49935
Q8K2Z4	Condensin complex subunit 1 (Chromosome condensation-related SMC-associated protein 1) (Chromosome-associated protein D2) (mCAP-D2) (Non-SMC condensin I complex subunit D2) (XCAP-D2 homolog)	NCAPD2	BRAIN	REGULATED	down	-1.52421	-1.68422	-1.44365	-2.75695	-2.71629	-2.47434	-3.07025	-3.16407	-2.73769	-3.05729	-2.79929	-3.07274
P61358	60S ribosomal protein L27	RPL27	BRAIN	REGULATED	down	0.382882	0.0903086	0.11216	-1.70742	-1.88429	-1.56641	-1.58058	-1.3754	-1.37849	-1.39745	-1.05528	-1.26612
O88271	Craniofacial development protein 1 (27 kDa craniofacial protein) (Bucentaur) (Protein Cp27)	CFDP1	BRAIN	REGULATED	down	-1.69424	-1.9829	-1.05027	-2.85912	-2.46331	-2.00677	-5.16527	-3.5834	-5.5468	-4.46183	-3.60753	-2.51166
Q9D2U5	N-alpha-acetyltransferase 38, NatC auxiliary subunit (LSM domain-containing protein 1)	NAA38	BRAIN	REGULATED	down	-1.70905	-1.49663	-1.48316	-1.51392	-1.72246	-1.72778	-4.33305	-4.12177	-3.50314	-5.12793	-4.55532	-1.98706
Q9CZX8	40S ribosomal protein S19	RPS19	BRAIN	REGULATED	down	2.4297	2.44419	2.57307	1.16994	1.14917	1.31484	0.907502	1.04536	1.10502	1.1169	1.2276	1.10327
P62852	40S ribosomal protein S25	RPS25	BRAIN	REGULATED	down	1.90716	1.82751	1.99027	0.773059	0.806562	0.902269	0.499132	0.580667	0.486816	0.616154	0.674305	0.593205
Q8VBZ3	Cleft lip and palate transmembrane protein 1 homolog (Thymic epithelial cell surface antigen)	CLPTM1	BRAIN	REGULATED	down	-0.909992	-0.99863	-0.606778	-3.04717	-2.28996	-1.31688	-2.58917	-2.55312	-1.59119	-2.43046	-1.5698	-2.81322
P62748	Hippocalcin-like protein 1 (Neural visinin-like protein 3) (NVL-3) (NVP-3) (Visinin-like protein 3) (VILIP-3)	HPCAL1	BRAIN	REGULATED	down	0.832227	0.884905	0.961383	0.278259	0.17375	0.207452	0.292199	0.328135	0.394915	-0.386591	-0.373533	-0.43027
Q9CQT2	RNA-binding protein 7 (RNA-binding motif protein 7)	RBM7	BRAIN	REGULATED	down	-4.51369	-3.43291	-3.94463	-2.6762	-2.236	-2.96816	-5.23803	-3.83931		-5.13448	-6.58645	-5.03885
P62270	40S ribosomal protein S18 (Ke-3) (Ke3)	RPS18	BRAIN	REGULATED	down	1.9822	1.84767	1.94072	0.747115	0.56415	0.439141	0.486333	0.524892	0.382155	0.751123	0.653032	0.634557
Q5SSH7	Zinc finger ZZ-type and EF-hand domain-containing protein 1	ZZEF1	BRAIN	REGULATED	down	-1.02301	-0.93119	-1.00002	-1.47479	-1.57186	-1.7521	-1.90346	-1.78569	-2.05824	-2.16766	-2.20901	-2.29794
Q80YX1	Tenascin (TN) (Hexabrachion) (Tenascin-C) (TN-C)	TNC	BRAIN	REGULATED	down	-0.601277	-0.227405	-0.200696	-0.795245	-0.625416	-0.536698	-1.64869	-1.40943	-1.49291	-1.78626	-1.38164	-1.6852
Q75N62	GTPase IMAP family member 8 (mGIMAP8) (Immune-associated nucleotide-binding protein 9) (IAN-9) (Immunity-associated protein 8)	GIMAP8	BRAIN	REGULATED	down	-2.81664	-3.26291	-2.87141	-3.47477	-3.73028	-3.45127	-3.87588	-3.71954	-3.52893	-3.58805	-4.68901	-5.08941
P62301	40S ribosomal protein S13	RPS13	BRAIN	REGULATED	down	1.84211	1.70914	1.86453	0.577162	0.448448	0.339821	0.144756	0.255918	0.284028	0.602373	0.657088	0.484059
P97461	40S ribosomal protein S5 [Cleaved into: 40S ribosomal protein S5, N-terminally processed]	RPS5	BRAIN	REGULATED	down	1.22152	1.31957	1.52078	0.411675	0.290892	0.346015	-0.513893	-0.309285	-0.214023	0.15816	0.184204	0.0616474
Q6ZWV7	60S ribosomal protein L35	RPL35	BRAIN	REGULATED	down	-0.10559	-0.130743	-0.113769	-1.22018	-1.2667	-1.35087	-1.41056	-1.30601	-1.31449	-1.20933	-1.37889	-1.38206
Q66JS6	Eukaryotic translation initiation factor 3 subunit J-B (eIF3j-B) (Eukaryotic translation initiation factor 3 subunit 1-B) (eIF-3-alpha-B) (eIF3 p35)	EIF3J2	BRAIN	REGULATED	down	0.350258	0.381097	0.570004	-0.727482	-0.579277	-0.292924	-0.808404	-0.832253	-0.623645	-0.758214	-0.788995	-0.695392
Q6PGC1	ATP-dependent RNA helicase DHX29 (EC 3.6.4.13) (DEAH box protein 29)	DHX29	BRAIN	REGULATED	down	-1.97537	-1.77074	-1.67576	-2.62564	-2.35472	-2.17067	-3.46411	-3.08616	-3.18301	-2.53757	-3.6766	-3.29217
P32233	Developmentally-regulated GTP-binding protein 1 (DRG-1) (Neural precursor cell expressed developmentally down-regulated protein 3) (NEDD-3)	DRG1	BRAIN	REGULATED	down	-0.281191	-0.607995	-0.0948658	-1.29401	-1.21866	-0.75167	-1.41564	-1.72025	-1.91288	-2.1704	-1.15981	-1.5605
Q62093	Serine/arginine-rich splicing factor 2 (Protein PR264) (Putative myelin regulatory factor 1) (MRF-1) (Splicing component, 35 kDa) (Splicing factor SC35) (SC-35) (Splicing factor, arginine/serine-rich 2)	SRSF2	BRAIN	REGULATED	down	1.41243	1.3008	1.38746	0.925715	0.777235	0.853607	0.943235	0.737143	0.852748	0.16535	0.225747	0.196115
O35887	Calumenin (Crocalbin)	CALU	BRAIN	REGULATED	down	0.448992	0.447572	1.02004	-0.298301	-0.755401	-0.460886	-0.831423	-1.16584	-0.991659	-0.469567	-0.250574	-1.09032
Q3TWW8	Serine/arginine-rich splicing factor 6 (Pre-mRNA-splicing factor SRP55) (Splicing factor, arginine/serine-rich 6)	SRSF6	BRAIN	REGULATED	down	-0.852189	-1.01672	-1.02123	-1.33458	-1.26692	-1.3956	-1.73559	-1.54262	-1.65131	-2.14963	-2.11089	-2.15849
Q9CWF2	Tubulin beta-2B chain	TUBB2B	BRAIN	REGULATED	down	4.34294	4.17258	4.3157	2.94141	2.8626	3.05675	2.89183	2.97927	2.95161	3.16268	3.25051	2.98291
Q80W93	Hydrocephalus-inducing protein (Protein Hy-3)	HYDIN	BRAIN	REGULATED	down	-2.53075	-2.54029	-2.38156	-2.98496	-3.0749	-3.08203	-3.64045	-3.58873	-3.82507	-3.55858	-3.51188	-3.82652
Q9R1T2	SUMO-activating enzyme subunit 1 (Ubiquitin-like 1-activating enzyme E1A) [Cleaved into: SUMO-activating enzyme subunit 1, N-terminally processed]	SAE1	BRAIN	REGULATED	down	0.630483	0.628243	0.840664	-0.0472201	-0.344956	0.0202912	-0.90506	-0.446117	-0.248089	-0.498677	-0.421398	-0.403865
P62983	Ubiquitin-40S ribosomal protein S27a (Ubiquitin carboxyl extension protein 80) [Cleaved into: Ubiquitin; 40S ribosomal protein S27a]	RPS27A	BRAIN	REGULATED	down	2.20138	1.98176	2.09928	0.829508	0.631858	0.742014	0.973791	0.899515	0.936407	1.0021	0.993501	0.906459
P99027	60S acidic ribosomal protein P2	RPLP2	BRAIN	REGULATED	down	3.56393	3.56866	3.828	2.78636	2.94282	2.80504	2.61442	2.64429	2.55624	2.58704	2.51363	2.53377
Q3UE31	Uncharacterized protein KIAA0930 homolog	KIAA0930	BRAIN	REGULATED	down	-0.335103	-1.23869	-1.52729	-2.02728	-2.1107	-1.92445	-2.51831	-2.25665	-2.42607	-2.40371	-2.2561	-2.26545
P08414	Calcium/calmodulin-dependent protein kinase type IV (CaMK IV) (EC 2.7.11.17) (CaM kinase-GR)	CAMK4	BRAIN	REGULATED	down	0.185387	0.0353478	0.348037	-0.438737	-0.467988	-0.340488	-1.19184	-1.10702	-1.04966	-1.00329	-0.860594	-0.920338
P60229	Eukaryotic translation initiation factor 3 subunit E (eIF3e) (Eukaryotic translation initiation factor 3 subunit 6) (MMTV integration site 6) (Mammary tumor-associated protein INT-6) (Viral integration site protein INT-6) (eIF-3 p48)	EIF3E	BRAIN	REGULATED	down	1.13755	0.764715	1.34507	0.425737	0.184016	0.595575	-1.91707	-0.403918	-0.87262	-0.271233	0.255841	-0.160255
Q80UM3	N-alpha-acetyltransferase 15, NatA auxiliary subunit (N-terminal acetyltransferase 1) (NMDA receptor-regulated protein 1) (Protein tubedown-1)	NAA15	BRAIN	REGULATED	down	-1.08806	-1.29644	-1.18548	-1.72764	-1.52434	-1.85899	-2.17757	-2.26266	-2.18601	-2.2486	-2.23351	-2.39621
P14869	60S acidic ribosomal protein P0 (60S ribosomal protein L10E)	RPLP0	BRAIN	REGULATED	down	0.276504	0.275931	0.531165	-0.863233	-1.17761	-1.13688	-0.572048	-0.852303	-0.660231	-0.663473	-0.715894	-0.779446
Q8VBY2	Calcium/calmodulin-dependent protein kinase kinase 1 (CaM-KK 1) (CaM-kinase kinase 1) (CaMKK 1) (EC 2.7.11.17) (CaM-kinase IV kinase) (Calcium/calmodulin-dependent protein kinase kinase alpha) (CaM-KK alpha) (CaM-kinase kinase alpha) (CaMKK alpha)	CAMKK1	BRAIN	REGULATED	down	-2.02649	-2.01658	-1.82032	-2.71287	-2.85339	-2.55244	-2.78485	-3.22525	-3.08819	-2.88499	-3.2729	-3.01508
Q8BHS6	Armadillo repeat-containing X-linked protein 3	ARMCX3	BRAIN	REGULATED	down	-1.65788	-1.53885	-1.37732	-2.24366	-2.27015	-2.05931	-2.94603	-2.39115	-2.9906	-2.92495	-2.33247	-2.65617
Q9ERR1	Nuclear distribution protein nudE-like 1 (Protein mNudE-like) (Protein Nudel) (mNudE-L)	NDEL1	BRAIN	REGULATED	down	-1.20456	-1.21586	-0.637813	-1.20419	-0.728331	-0.896071	-2.40109	-2.11857	-2.3532	-2.14168	-2.15197	-2.0277
Q8VD62	UPF0696 protein C11orf68 homolog (Basophilic leukemia-expressed protein Bles03) (Protein WF-3)	BLES03	BRAIN	REGULATED	down	1.00374	0.944473	1.04424	0.172666	0.498818	0.635202	0.161325	-0.188256	-0.0559998	-0.0504644	-0.0703533	-0.0510411
Q8R0A5	Transcription elongation factor A protein-like 3 (TCEA-like protein 3) (Transcription elongation factor S-II protein-like 3)	TCEAL3	BRAIN	REGULATED	down	-2.44952	-3.19764	-2.22067	-3.59795	-3.6545	-3.82416	-4.00243	-3.06194	-3.82991	-3.771	-3.72719	-3.77668
Q61545	RNA-binding protein EWS	EWSR1	BRAIN	REGULATED	down	1.60962	1.51907	1.70716	0.997376	0.878714	0.902342	0.639371	0.778197	0.909216	0.623023	0.65899	0.439217
Q811J3	Iron-responsive element-binding protein 2 (IRE-BP 2) (Iron regulatory protein 2) (IRP2)	IREB2	BRAIN	REGULATED	down	-0.363206	-0.877049	-0.666338	-1.19499	-1.13515	-1.1215	-1.83118	-1.49438	-1.58723	-1.82603	-1.49497	-1.8568
Q9EST5	Acidic leucine-rich nuclear phosphoprotein 32 family member B (Proliferation-related acidic leucine-rich protein PAL31)	ANP32B	BRAIN	REGULATED	down	0.0516076	0.462196	0.824565	0.332524	0.337966	0.668798	-0.896199	-0.715895	-0.826355	-0.636959	-0.74754	-0.599011
Q64362	AKT-interacting protein (FT1) (Fused toes protein)	AKTIP	BRAIN	REGULATED	down	-0.637704	-0.427076	-0.590039	-1.44072	-1.07046	-1.6407	-2.39379	-1.73646	-1.28013	-1.91964	-1.42716	-1.55736
E9PUL5	Proline-rich transmembrane protein 2 (Dispanin subfamily B member 3) (DSPB3)	PRRT2	BRAIN	REGULATED	down	3.0928	3.08381	3.18921	2.44838	2.43941	2.49677	2.09191	2.24171	2.24393	2.14148	2.12432	2.04811
O88745	Scrapie-responsive protein 1 (Scrapie-responsive gene 1 protein) (ScRG-1)	SCRG1	BRAIN	REGULATED	down	-1.45149	-1.45653	-1.2708	-2.41187	-2.41697	-2.2266	-2.68734	-2.4437	-2.40525	-2.33169	-2.50079	-2.41177
Q9CR00	26S proteasome non-ATPase regulatory subunit 9 (26S proteasome regulatory subunit p27)	PSMD9	BRAIN	REGULATED	down	-0.0556295	-0.00904544	0.154024	-0.849309	-0.90528	-0.578745	-1.0887	-1.13334	-0.957382	-1.01102	-0.988644	-0.962553
Q9CQX2	Cytochrome b5 type B (Cytochrome b5 outer mitochondrial membrane isoform)	CYB5B	BRAIN	REGULATED	down	-1.362	-1.23048	-1.04156	-1.62854	-1.78118	-1.67348	-3.04234	-2.98119	-2.34696	-2.08171	-2.45049	-2.20285
P05480	Neuronal proto-oncogene tyrosine-protein kinase Src (EC 2.7.10.2) (Proto-oncogene c-Src) (pp60c-src) (p60-Src)	SRC	BRAIN	REGULATED	down	-4.41307	-4.58169	-5.51344	-9.08893	-6.59564	-5.33876	-8.8268	-8.11637	-8.79449	-6.45931	-5.06632	-6.78571
Q91X97	Neurocalcin-delta	NCALD	BRAIN	REGULATED	down	0.923989	0.858926	1.00039	0.247914	0.222508	0.213806	-0.0185067	-0.0911959	-0.135919	-0.0285102	-0.0659641	-0.132426
P08046	Early growth response protein 1 (EGR-1) (Nerve growth factor-induced protein A) (NGFI-A) (Transcription factor Zif268) (Zinc finger protein Krox-24)	EGR1	BRAIN	REGULATED	down	-0.981131	-1.05014	-0.838257	-1.61642	-1.73781	-1.77653	-2.06528	-1.87914	-1.94509	-1.7872	-1.98433	-2.13381
Q61074	Protein phosphatase 1G (EC 3.1.3.16) (Fibroblast growth factor-inducible protein 13) (FIN13) (Protein phosphatase 1C) (Protein phosphatase 2C isoform gamma) (PP2C-gamma) (Protein phosphatase magnesium-dependent 1 gamma)	PPM1G	BRAIN	REGULATED	down	-0.583933	-0.743259	-0.584421	-1.20725	-1.30924	-1.15253	-1.83836	-1.6533	-1.65973	-1.77291	-1.35934	-1.89095
Q8R0P4	Mth938 domain-containing protein (LI2)	AAMDC	BRAIN	REGULATED	down	-1.70929	-1.71624	-1.59446	-2.2543	-2.38552	-2.17026	-2.35468	-2.45899	-2.2917	-2.45025	-3.42527	-2.50578
Q6P2B1	Transportin-3	TNPO3	BRAIN	REGULATED	down	-2.79103	-2.81101	-2.71922	-3.6485	-3.81059	-3.87372	-4.59725	-4.46148	-4.20137	-3.78213	-3.9275	-3.65028
Q91VW5	Golgin subfamily A member 4 (tGolgin-1)	GOLGA4	BRAIN	REGULATED	down	-0.58517	0.217192	-0.367217	-0.839285	-0.915712	-1.09514	-2.13804	-1.34182	-3.23829	-1.4051	-1.28708	-1.31912
Q8C078	Calcium/calmodulin-dependent protein kinase kinase 2 (CaM-KK 2) (CaM-kinase kinase 2) (CaMKK 2) (EC 2.7.11.17) (Calcium/calmodulin-dependent protein kinase kinase beta) (CaM-KK beta) (CaM-kinase kinase beta) (CaMKK beta)	CAMKK2	BRAIN	REGULATED	down	-0.538927	-0.622494	-0.325077	-0.996235	-1.00593	-0.825426	-2.34286	-2.02431	-1.79563	-1.51566	-1.29694	-1.69417
P28867	Protein kinase C delta type (EC 2.7.11.13) (Tyrosine-protein kinase PRKCD) (EC 2.7.10.2) (nPKC-delta) [Cleaved into: Protein kinase C delta type regulatory subunit; Protein kinase C delta type catalytic subunit (Sphingosine-dependent protein kinase-1) (SDK1)]	PRKCD	BRAIN	REGULATED	down	0.785779	0.583606	0.77131	0.228536	0.43037	0.229557	-0.682794	-0.49487	-0.650196	-0.141373	-0.279871	-0.447165
Q7M6Z4	Kinesin-like protein KIF27	KIF27	BRAIN	REGULATED	down	1.55597	1.45436	1.57169	0.708318	0.635177	0.717742	0.672687	0.272802	0.383808	0.624829	0.566116	0.442809
Q6ZQK5	Arf-GAP with coiled-coil, ANK repeat and PH domain-containing protein 2 (Centaurin-beta-2) (Cnt-b2)	ACAP2	BRAIN	REGULATED	down	0.71312	0.440326	0.542747	-0.00547939	-0.107246	0.0586478	-0.425827	-0.454335	-0.551839	-0.31183	-0.340005	-0.605929
A2RT62	F-box/LRR-repeat protein 16 (F-box and leucine-rich repeat protein 16)	FBXL16	BRAIN	REGULATED	down	1.25242	1.17639	1.29574	0.61873	0.686827	0.612453	-0.0731547	-0.0920931	-0.140858	0.304892	0.349263	0.169843
Q924A2	Protein capicua homolog	CIC	BRAIN	REGULATED	down	-0.275148	-0.262659	-0.30698	-0.698964	-0.553905	-0.540586	-1.35066	-1.51212	-1.38165	-1.25373	-1.25731	-1.22699
Q61024	Asparagine synthetase [glutamine-hydrolyzing] (EC 6.3.5.4) (Glutamine-dependent asparagine synthetase)	ASNS	BRAIN	REGULATED	down	-2.09874	-2.00673	-1.91396	-3.15154	-3.47478	-3.06074	-3.37846	-3.26391	-2.83569	-2.90631	-2.91554	-3.10389
Q3U4G3	Xyloside xylosyltransferase 1 (EC 2.4.2.n3) (UDP-xylose:alpha-xyloside alpha-1,3-xylosyltransferase)	XXYLT1	BRAIN	REGULATED	down	-1.38675	-1.32786	-1.13911	-1.94053	-1.87092	-1.87779	-2.40842	-2.53375	-2.53599	-2.34874	-2.09346	-2.30888
P02089	Hemoglobin subunit beta-2 (Beta-2-globin) (Hemoglobin beta-2 chain) (Hemoglobin beta-minor chain)	HBB-B2	HEART	REGULATED	down	0.409426	-0.142918	0.149281	-6.45921	-5.21196	-6.47248	-6.9598	-6.64495	-7.55073	-3.22363	-3.07606	-2.64986
P10852	4F2 cell-surface antigen heavy chain (4F2hc) (Solute carrier family 3 member 2) (CD antigen CD98)	SLC3A2	HEART	REGULATED	down	-3.1666	-3.46406	-2.97981	-3.15891	-3.61267	-3.7618	-5.19715	-5.2699	-5.45837	-7.62328	-5.33282	-7.15138
Q9CXW3	Calcyclin-binding protein (CacyBP) (Siah-interacting protein)	CACYBP	HEART	REGULATED	up	-6.34154	-4.00445	-3.27891	-6.2243	-5.16425	-3.73721	-2.75283	-4.14671	-4.02961	-0.619781	-1.07084	-0.168217
A3KG59	Peptidase M20 domain-containing protein 2 (Aminoacylase-1-like protein 2)	PM20D2	HEART	REGULATED	up	-2.81008	-3.22516	-2.92722	-0.342104	-0.0172274	-0.0758444	-1.75328	-1.54307	-2.12478	0.196184	0.201984	0.289353
P05125	Natriuretic peptides A (Prepronatriodilatin) [Cleaved into: Atrial natriuretic factor (ANF) (Atrial natriuretic peptide) (ANP); Auriculin-B; Auriculin-A; Atriopeptin-1 (Atriopeptin I); Atriopeptin-2 (Atriopeptin II)]	NPPA	HEART	REGULATED	down	4.902	4.86569	4.84214	3.64033	3.75592	3.79222	-0.464176	-0.237874	-0.420541	1.91567	1.99869	2.44731
P01872	Ig mu chain C region	IGHM	HEART	REGULATED	up	1.0275	0.969232	1.25249	3.19814	3.38131	3.3546	1.49347	1.47176	1.54576	3.75219	3.91391	3.97324
P16110	Galectin-3 (Gal-3) (35 kDa lectin) (Carbohydrate-binding protein 35) (CBP 35) (Galactose-specific lectin 3) (IgE-binding protein) (L-34 galactoside-binding lectin) (Laminin-binding protein) (Lectin L-29) (Mac-2 antigen)	LGALS3	HEART	REGULATED	down	-0.632658	-0.63274	-0.729157	-2.60593	-2.59495	-2.5853	-5.63716	-5.33846	-5.25518	-3.49425	-3.1374	-3.25555
Q9QVP4	Myosin regulatory light chain 2, atrial isoform (MLC-2a) (MLC2a) (Myosin light chain 2a) (Myosin regulatory light chain 7)	MYL7	HEART	REGULATED	down	7.54397	8.03101	8.01153	6.44245	6.65577	6.698	2.32558	2.183	2.26197	5.35947	5.37821	5.36933
Q71RI9	Kynurenine--oxoglutarate transaminase 3 (EC 2.6.1.7) (Cysteine-S-conjugate beta-lyase 2) (EC 4.4.1.13) (Kynurenine aminotransferase 3) (Kynurenine aminotransferase III) (KATIII) (Kynurenine--glyoxylate transaminase) (EC 2.6.1.63) (Kynurenine--oxoglutarate transaminase III)	KYAT3	HEART	REGULATED	up	-3.43265	-3.33818	-2.89268	-1.40721	-1.41448	-1.29261	-1.55732	-1.48111	-1.5097	-0.644737	-0.537173	-0.462432
Q9R1P3	Proteasome subunit beta type-2 (EC 3.4.25.1) (Macropain subunit C7-I) (Multicatalytic endopeptidase complex subunit C7-I) (Proteasome component C7-I)	PSMB2	HEART	REGULATED	up	-8.2755	-4.83143	-4.98797	-4.53207	-6.62861	-5.24418	-4.0601	-4.24044	-5.33218	-3.38834	-2.68266	-2.95077
Q5FW53	Myosin-binding protein H-like	MYBPHL	HEART	REGULATED	down	4.96109	4.89933	5.0277	3.19906	3.30529	3.45793	-2.70609	-2.55182	-2.5872	2.29655	2.52665	2.67103
P13634	Carbonic anhydrase 1 (EC 4.2.1.1) (Carbonate dehydratase I) (Carbonic anhydrase I) (CA-I)	CA1	HEART	REGULATED	up	-2.66154	-2.68938	-2.4473	-1.42073	-1.34428	-1.15314	-2.50057	-2.62472	-2.40638	-0.215356	0.104278	0.159129
Q3UHD3	Microtubule-associated tumor suppressor candidate 2 homolog (Cardiac zipper protein) (Microtubule plus-end tracking protein TIP150) (Tracking protein of 150 kDa)	MTUS2	HEART	REGULATED	up	-6.30995	-5.25308	-5.47834	-4.12148	-3.923	-4.26763	-3.93516	-3.84266	-4.09523	-3.33562	-3.01577	-2.85805
P24668	Cation-dependent mannose-6-phosphate receptor (CD Man-6-P receptor) (CD-MPR) (46 kDa mannose 6-phosphate receptor) (MPR 46)	M6PR	HEART	REGULATED	up	0.875644	1.03969	1.16721	2.09546	4.217	2.59076	0.434039	0.823735	1.00128	2.70198	4.01935	4.244
P09541	Myosin light chain 4 (MLC1EMB) (Myosin light chain 1, atrial/fetal isoform) (MLC1A)	MYL4	HEART	REGULATED	down	8.42348	8.40255	8.46064	7.01474	7.14335	7.24462	3.13121	3.08321	3.10137	5.9716	6.12201	6.25848
Q8BT42	Small integral membrane protein 5	SMIM5	HEART	REGULATED	down	-4.16405	-4.28373	-4.03899	-4.62086		-4.94522	-5.44679	-5.72391	-5.48154	-6.70671	-5.78813	-6.69497
Q9WVH9	Fibulin-5 (FIBL-5) (Developmental arteries and neural crest EGF-like protein) (Dance)	FBLN5	HEART	REGULATED	down	1.4987	1.50572	1.55849	0.800021	0.794099	0.893802	-0.214873	-0.202019	-0.0739503	-0.841002	-0.737875	-0.654534
Q9WVL0	Maleylacetoacetate isomerase (MAAI) (EC 5.2.1.2) (GSTZ1-1) (Glutathione S-transferase zeta 1) (EC 2.5.1.18)	GSTZ1	HEART	REGULATED	up	-2.14497	-2.4911	-2.25054	-1.18833	-1.07715	-0.927887	-0.99188	-0.919378	-1.16606	-0.182658	-0.079201	-0.0421291
Q8CGN5	Perilipin-1 (Lipid droplet-associated protein) (Perilipin A)	PLIN1	HEART	REGULATED	down	-2.82007	-2.79874	-2.60163	-0.0723863	0.607034	0.280936	-6.48279	-5.44814	-7.17129	-5.42894	-4.84372	-4.54231
Q9R0M4	Podocalyxin (Podocalyxin-like protein 1) (PC) (PCLP-1)	PODXL	HEART	REGULATED	down	-1.03593	-1.16523	-1.33954	-2.1881	-2.01977	-1.54131	-1.85312	-2.03461	-2.3133	-3.08953	-2.68458	-3.99505
P05977	Myosin light chain 1/3, skeletal muscle isoform (MLC1/MLC3) (MLC1F/MLC3F) (Myosin light chain alkali 1/2) (Myosin light chain A1/A2)	MYL1	HEART	REGULATED	down	4.39583	4.50222	4.59765	3.11175	3.27549	3.33155	0.53376	0.44775	0.780957	2.1586	2.33106	2.44934
P30999	Catenin delta-1 (Cadherin-associated Src substrate) (CAS) (p120 catenin) (p120(ctn)) (p120(cas))	CTNND1	HEART	REGULATED	up	-6.92459	-6.97494	-6.84817	-8.11342	-4.68436	-1.4675	-5.36302	-6.54729	-6.87458	-4.7642	-2.05476	-5.64677
Q9CQZ1	Heat shock factor-binding protein 1	HSBP1	HEART	REGULATED	down	-2.87813	-2.881	-2.32717	-2.47934	-2.14322	-2.86538	-4.45103	-4.14225	-4.00131	-4.39512	-4.44108	-5.239
P17879	Heat shock 70 kDa protein 1B (Heat shock 70 kDa protein 1) (HSP70.1)	HSPA1B	HEART	REGULATED	down	-0.278013	0.154592	-0.132025	-0.524117	-0.0300027	-0.56781	-1.19012	-0.858478	-1.43271	-2.30288	-2.0441	-2.07755
Q99J99	3-mercaptopyruvate sulfurtransferase (MST) (EC 2.8.1.2)	MPST	HEART	REGULATED	up	-2.802	-2.57239	-1.90141	-1.74575	-1.50881	-1.30603	-1.45754	-1.51554	-1.13142	-0.506237	-0.396615	-0.142483
Q9JHW2	Omega-amidase NIT2 (EC 3.5.1.3) (Nitrilase homolog 2)	NIT2	HEART	REGULATED	up	-1.55777	-1.95101	-1.80992	-0.947138	-0.708626	-0.387833	-0.450591	-0.41681	-0.488678	0.111763	0.21495	0.312068
P00848	ATP synthase subunit a (F-ATPase protein 6)	MTATP6	HEART	REGULATED	up	-2.96928	-3.53739	-2.93545	-3.4232	-2.77086	-2.75065	-3.34908	-3.61791	-3.1899	-1.33873	-1.3171	-0.924208
O35074	Prostacyclin synthase (EC 5.3.99.4) (Prostaglandin I2 synthase)	PTGIS	HEART	REGULATED	down	0.880103	0.799057	1.04419	0.0303131	0.191366	-0.454637	-0.713179	-0.882264	-0.626299	-2.20062	-1.0623	-0.124683
Q64669	NAD(P)H dehydrogenase [quinone] 1 (EC 1.6.5.2) (Azoreductase) (DT-diaphorase) (DTD) (Menadione reductase) (NAD(P)H:quinone oxidoreductase 1) (Phylloquinone reductase) (Quinone reductase 1) (QR1)	NQO1	HEART	REGULATED	up	-4.32378	-4.08761	-4.03507	-3.39738	-2.93312	-3.26471	-3.26885	-3.1279	-2.86893	-2.473	-2.12167	-2.10022
O88935	Synapsin-1 (Synapsin I)	SYN1	HEART	REGULATED	down	-2.76235	-2.75031	-2.9418	-0.761445	-0.701688	-0.659117	-5.18133	-4.86672	-6.46859	-4.81019	-4.30858	-4.98667
P15508	Spectrin beta chain, erythrocytic (Beta-I spectrin)	SPTB	HEART	REGULATED	up	-2.87553	-3.41443	-3.7058	-2.42194	-2.65896	-2.00037	-4.99788	-6.18733	-4.50929	-1.40958	-1.27719	-1.3428
Q3UMT1	Protein phosphatase 1 regulatory subunit 12C (Protein phosphatase 1 myosin-binding subunit of 85 kDa) (Protein phosphatase 1 myosin-binding subunit p85)	PPP1R12C	HEART	REGULATED	down	-0.934236	-1.0584	-1.10979	-3.53618	-3.31436	-3.04268	-3.52133	-3.72188	-3.43437	-3.16712	-2.86538	-2.72355
Q9CR13	Protein FMC1 homolog (Formation of mitochondrial complex V assembly factor 1)	FMC1	HEART	REGULATED	up	-1.75206	-2.6654	-1.19713	-0.676557	-0.656121	-1.00371	-0.874986	-0.577128	-0.138286	0.123798	0.0471147	0.192215
A6X935	Inter alpha-trypsin inhibitor, heavy chain 4 (ITI heavy chain H4) (ITI-HC4) (Inter-alpha-inhibitor heavy chain 4)	ITIH4	HEART	REGULATED	up	-6.94994	-3.99802	-4.84784	-2.52724	-2.93806	-2.38114	-4.46725	-4.1329	-4.39658	-2.69992	-3.02221	-2.92849
P15327	Bisphosphoglycerate mutase (BPGM) (EC 5.4.2.4) (2,3-bisphosphoglycerate mutase, erythrocyte) (2,3-bisphosphoglycerate synthase) (EC 5.4.2.11) (BPG-dependent PGAM)	BPGM	HEART	REGULATED	up	-1.90973	-1.06047	-0.719978	-0.976794	-0.438752	-0.253818	-1.51168	-1.62268	-1.24982	0.660232	0.452091	0.956682
P60202	Myelin proteolipid protein (PLP) (Lipophilin)	PLP1	HEART	REGULATED	down	-1.14291	-0.890569	-1.36581	0.714727	0.957098	0.980559	-2.76933	-2.46495	-3.4623	-3.6162	-2.53074	-2.65604
P97792	Coxsackievirus and adenovirus receptor homolog (CAR) (mCAR)	CXADR	HEART	REGULATED	down	-2.37642	-2.27174	-2.09187	-2.73028	-3.30889	-2.8493	-3.74024	-4.15741	-4.48976	-4.34738	-3.53283	-4.28731
Q9Z2U1	Proteasome subunit alpha type-5 (EC 3.4.25.1) (Macropain zeta chain) (Multicatalytic endopeptidase complex zeta chain) (Proteasome zeta chain)	PSMA5	HEART	REGULATED	up	-3.91268	-5.8791	-6.42583	-5.17396	-5.02123	-3.85808	-5.4529	-4.41112	-5.50612	-3.3336	-3.40383	-3.10816
Q8C5H8	NAD kinase 2, mitochondrial (EC 2.7.1.23) (Mitochondrial NAD kinase) (NAD kinase domain-containing protein 1, mitochondrial)	NADK2	HEART	REGULATED	up	-1.40114	-1.48207	-1.80002	-0.695937	-0.795677	-0.362169	-0.531239	-0.442602	-0.581314	0.150426	0.184815	0.538859
P45377	Aldose reductase-related protein 2 (AR) (EC 1.1.1.21) (Aldehyde reductase) (Fibroblast growth factor-regulated protein) (Protein FR-1)	AKR1B8	HEART	REGULATED	up	-1.07064	-1.08727	-0.93751	-0.308738	-0.116352	-0.317763	-0.0238938	-0.170314	0.0397022	0.631351	0.683605	0.7984
P48758	Carbonyl reductase [NADPH] 1 (EC 1.1.1.184) (15-hydroxyprostaglandin dehydrogenase [NADP(+)]) (EC 1.1.1.197) (NADPH-dependent carbonyl reductase 1) (Prostaglandin 9-ketoreductase) (Prostaglandin-E(2) 9-reductase) (EC 1.1.1.189)	CBR1	HEART	REGULATED	up	-4.0761	-4.53076	-3.86431	-3.28457	-3.01715	-3.27188	-3.08864	-3.33458	-3.06231	-2.59822	-2.27123	-2.21447
P55772	Ectonucleoside triphosphate diphosphohydrolase 1 (NTPDase 1) (EC 3.6.1.5) (Ecto-ATP diphosphohydrolase 1) (Ecto-ATPDase 1) (Ecto-ATPase 1) (Ecto-apyrase) (Lymphoid cell activation antigen) (CD antigen CD39)	ENTPD1	HEART	REGULATED	down	-1.5192	-1.77727	-1.37832	-2.11098	-1.97977	-2.13814	-2.87602	-3.06742	-2.9029	-3.78658	-3.17888	-2.9242
Q80UF4	Serologically defined colon cancer antigen 8 homolog (Centrosomal colon cancer autoantigen protein) (mCCCAP)	SDCCAG8	HEART	REGULATED	up	-4.08054	-4.13887	-3.92111	-3.56792	-3.15876	-3.10594	-3.00672	-3.0208	-2.90146	-2.45728	-2.16376	-2.2704
Q9R229	Bone morphogenetic protein 10 (BMP-10)	BMP10	HEART	REGULATED	down	0.336444	0.446478	0.446029	-1.28787	-1.08733	-1.15868	-2.56309	-2.92557	-2.73202	-0.959606	-1.51965	-1.54836
Q91Z53	Glyoxylate reductase/hydroxypyruvate reductase (EC 1.1.1.79) (EC 1.1.1.81)	GRHPR	HEART	REGULATED	up	-2.87273	-2.44896	-2.32514	-1.92738	-1.5338	-1.88813	-1.67996	-1.82491	-1.53114	-0.929316	-0.778067	-0.641507
Q91V16	Electron transfer flavoprotein regulatory factor 1 (Growth hormone-inducible soluble protein) (LYR motif-containing protein 5)	ETFRF1	HEART	REGULATED	up	-2.08003	-1.79651	-1.96953	-0.895651	-0.825906	-0.701014	-1.15963	-0.980608	-1.07675	-0.386403	-0.283071	-0.0418689
Q62009	Periostin (PN) (Osteoblast-specific factor 2) (OSF-2)	POSTN	HEART	REGULATED	down	0.272981	0.223649	0.281189	-0.346509	0.297989	0.344156	-1.58029	-1.74042	-1.56157	-1.37236	-1.32031	-1.54199
Q62351	Transferrin receptor protein 1 (TR) (TfR) (TfR1) (Trfr) (CD antigen CD71)	TFRC	HEART	REGULATED	down	-1.26976	-1.00832	-1.16773	-2.66038	-2.24682	-2.1204	-2.18085	-2.03204	-2.13228	-2.87291	-2.73402	-2.76381
Q91WM2	Cat eye syndrome critical region protein 5 homolog	CECR5	HEART	REGULATED	up	-1.9464	-1.90249	-1.89272	-1.39003	-1.29275	-1.14443	-0.942027	-0.734128	-1.01536	-0.420378	-0.22706	-0.0776286
Q8VCW8	Acyl-CoA synthetase family member 2, mitochondrial (EC 6.2.1.-)	ACSF2	HEART	REGULATED	up	0.320688	0.108195	0.249282	0.692355	1.07624	1.19272	1.1802	1.17876	1.21115	1.80509	1.85003	2.07445
Q61206	Platelet-activating factor acetylhydrolase IB subunit beta (EC 3.1.1.47) (PAF acetylhydrolase 30 kDa subunit) (PAF-AH 30 kDa subunit) (PAF-AH subunit beta) (PAFAH subunit beta)	PAFAH1B2	HEART	REGULATED	up	-7.88193	-4.50649	-4.32102	-3.39451	-2.59309	-3.39151	-4.28621	-4.00124	-6.97191	-3.46205	-2.60277	-3.42835
P11087	Collagen alpha-1(I) chain (Alpha-1 type I collagen)	COL1A1	HEART	REGULATED	down	1.7746	1.72602	1.64217	0.930546	1.06846	1.11996	-0.806063	-0.703164	-0.921594	-0.163429	0.103839	0.425331
Q80UN9	tRNA dimethylallyltransferase, mitochondrial (EC 2.5.1.75) (Isopentenyl-diphosphate:tRNA isopentenyltransferase) (IPP transferase) (IPPT) (tRNA isopentenyltransferase) (IPTase)	TRIT1	HEART	REGULATED	down	0.218809	0.169959	0.16486	-0.721797	-0.8188	-0.528571	-1.8974	-1.81144	-1.91709	-1.52054	-1.39734	-1.20653
Q9D6Y7	Mitochondrial peptide methionine sulfoxide reductase (EC 1.8.4.11) (Peptide-methionine (S)-S-oxide reductase) (Peptide Met(O) reductase) (Protein-methionine-S-oxide reductase) (PMSR)	MSRA	HEART	REGULATED	up	-1.11605	-1.55969	-0.873436	-0.184696	-0.324236	-0.24621	-0.370949	-0.368618	-0.273777	0.281361	0.641838	0.574428
P54071	Isocitrate dehydrogenase [NADP], mitochondrial (IDH) (EC 1.1.1.42) (ICD-M) (IDP) (NADP(+)-specific ICDH) (Oxalosuccinate decarboxylase)	IDH2	HEART	REGULATED	up	6.9984	6.87438	7.0097	7.75303	8.02358	7.91294	8.01992	7.99108	8.02539	8.44974	8.67607	8.66026
Q9DCM0	Persulfide dioxygenase ETHE1, mitochondrial (EC 1.13.11.18) (Ethylmalonic encephalopathy protein 1 homolog) (Hepatoma subtracted clone one protein) (Sulfur dioxygenase ETHE1)	ETHE1	HEART	REGULATED	up	-0.0304468	-0.0220691	0.0386067	0.819295	0.875317	0.993211	0.983912	1.03255	0.857228	1.47938	1.6727	1.69994
Q5SYD0	Unconventional myosin-Id	MYO1D	HEART	REGULATED	down	-3.12289	-2.78067	-3.93465	-7.51076	-3.41261		-5.32193	-4.77925	-4.42646	-6.33737	-4.16226	-4.60033
Q78HU7	Glycophorin-C (CD antigen CD236)	GYPC	HEART	REGULATED	down	-0.752978	-0.206922	-0.787477	-2.16932	-2.21738	-2.22383	-3.30319	-4.15702	-3.97223	-1.50987	-2.67781	-2.34422
Q99L04	Dehydrogenase/reductase SDR family member 1 (EC 1.1.-.-)	DHRS1	HEART	REGULATED	down	0.811771	0.751721	0.76833	-0.65549	-1.226	-0.460373	-0.252315	-0.235688	0.166932	-2.32714	0.0662319	-0.456522
Q922V4	Pleiotropic regulator 1	PLRG1	HEART	REGULATED	down	-3.33424	-4.02188	-3.28979	-3.56968	-2.60463	-2.8623	-3.19692	-2.53656	-2.69254	-4.93277	-4.66055	-5.82922
Q9Z2I8	Succinate--CoA ligase [GDP-forming] subunit beta, mitochondrial (EC 6.2.1.4) (GTP-specific succinyl-CoA synthetase subunit beta) (G-SCS) (GTPSCS) (Succinyl-CoA synthetase beta-G chain) (SCS-betaG)	SUCLG2	HEART	REGULATED	up	1.74534	1.6514	1.78859	2.43274	2.64515	2.66001	2.62268	2.63375	2.70987	3.065	3.36277	3.48973
Q91WK5	Glycine cleavage system H protein, mitochondrial (Lipoic acid-containing protein)	GCSH	HEART	REGULATED	up	0.588732	0.824332	1.22671	1.7505	2.26607	1.75942	1.84578	1.83701	1.96993	2.72502	2.5277	2.3167
Q9CWD8	Iron-sulfur protein NUBPL (Nucleotide-binding protein-like)	NUBPL	HEART	REGULATED	up	-2.41087	-2.23446	-1.98101	-1.98177	-1.00113	-1.17431	-1.01531	-0.990026	-1.01341	-0.557178	-0.712684	-0.502029
Q8K4Z3	NAD(P)H-hydrate epimerase (EC 5.1.99.6) (Apolipoprotein A-I-binding protein) (AI-BP) (NAD(P)HX epimerase)	NAXE	HEART	REGULATED	up	0.0175271	0.0487033	0.160093	0.61141	0.75002	0.963469	0.816122	0.85493	0.887951	1.52486	1.66231	1.78641
Q01149	Collagen alpha-2(I) chain (Alpha-2 type I collagen)	COL1A2	HEART	REGULATED	down	-2.54485	-2.61363	-2.52994	-2.95701	-3.07394	-2.64284	-4.74384	-4.63654	-5.16304	-4.20081	-3.96823	-3.82595
P05202	Aspartate aminotransferase, mitochondrial (mAspAT) (EC 2.6.1.1) (EC 2.6.1.7) (Fatty acid-binding protein) (FABP-1) (Glutamate oxaloacetate transaminase 2) (Kynurenine aminotransferase 4) (Kynurenine aminotransferase IV) (Kynurenine--oxoglutarate transaminase 4) (Kynurenine--oxoglutarate transaminase IV) (Plasma membrane-associated fatty acid-binding protein) (FABPpm) (Transaminase A)	GOT2	HEART	REGULATED	up	3.34461	3.46465	3.46987	3.56279	4.19601	3.80844	3.80154	3.8404	3.8691	4.80678	4.92539	5.27413
Q6PGG2	GEM-interacting protein (GMIP)	GMIP	HEART	REGULATED	down	-1.57212	-1.66532	-1.63175	-3.02236	-6.22699	-3.09022	-3.13017	-3.24604	-3.47275	-3.22668	-3.01654	-2.96329
Q8R2Q4	Ribosome-releasing factor 2, mitochondrial (RRF2mt) (Elongation factor G 2, mitochondrial) (EF-G2mt) (mEF-G 2)	GFM2	HEART	REGULATED	up	-2.4312	-2.30835	-1.6037	-2.63186	-0.841991	-2.46135	-1.33768	-1.35746	-0.580245	-0.2357	-1.22588	0.19304
Q62219	Transforming growth factor beta-1-induced transcript 1 protein (Androgen receptor-associated protein of 55 kDa) (Hydrogen peroxide-inducible clone 5 protein) (Hic-5) (TGF beta-stimulated clone 5) (TSC-5)	TGFB1I1	HEART	REGULATED	up	-2.22626	-2.85915	-3.22232	-3.11641	-2.34159	-0.18611	-2.82861	-2.98573	-2.57421	-0.226798	-0.770461	-2.11635
Q9EPB5	Serine hydrolase-like protein (SHL) (EC 3.1.-.-)	SERHL	HEART	REGULATED	up	-2.15443	-2.43992	-2.37548	-1.98775	-1.67391	-1.72941	-1.71015	-1.65436	-1.6494	-0.912747	-0.803216	-0.624327
Q9DA03	Complex III assembly factor LYRM7 (LYR motif-containing protein 7)	LYRM7	HEART	REGULATED	up	-1.95951	-1.57264	-1.42074	-1.20581	-0.896143	-0.632518	-0.88771	-0.800852	-1.00876	-0.330478	-0.0249458	0.060963
O70258	Epsilon-sarcoglycan (Epsilon-SG)	SGCE	HEART	REGULATED	down	-2.68373	-2.51894	-2.16138	-2.75289	-2.73223	-3.33741	-4.03122	-4.06945	-3.81783	-4.04924	-3.91478	-3.6541
P70271	PDZ and LIM domain protein 4 (LIM protein RIL) (Reversion-induced LIM protein)	PDLIM4	HEART	REGULATED	down	-0.284247	0.289792	0.207653	-0.442802	-0.906743	-0.244431	-2.40375	-2.76245	-1.72223	-1.65093	-1.28473	-1.08683
Q99P30	Peroxisomal coenzyme A diphosphatase NUDT7 (EC 3.6.1.-) (Nucleoside diphosphate-linked moiety X motif 7) (Nudix motif 7)	NUDT7	HEART	REGULATED	up	-1.72639	-1.81231	-1.7463	-1.42211	-0.969701	-1.09572	-1.47033	-1.40256	-1.26849	-0.195561	-0.276852	-0.249978
Q8VDC0	Probable leucine--tRNA ligase, mitochondrial (EC 6.1.1.4) (Leucyl-tRNA synthetase) (LeuRS)	LARS2	HEART	REGULATED	up	-2.83722	-2.49178	-2.56647	-2.41535	-1.91578	-2.04325	-1.96154	-1.72335	-2.35198	-1.29001	-1.10324	-0.915917
Q80XN0	D-beta-hydroxybutyrate dehydrogenase, mitochondrial (EC 1.1.1.30) (3-hydroxybutyrate dehydrogenase) (BDH)	BDH1	HEART	REGULATED	up	4.06276	4.11493	4.17125	5.11471	5.38898	5.31372	4.60041	4.64145	4.75318	5.52385	5.61327	5.72167
Q91Z83	Myosin-7 (Myosin heavy chain 7) (Myosin heavy chain slow isoform) (MyHC-slow) (Myosin heavy chain, cardiac muscle beta isoform) (MyHC-beta)	MYH7	HEART	REGULATED	up	3.15197	3.13367	3.37993	4.62754	4.8825	4.92909	2.59348	2.60407	2.70261	4.58016	4.70405	4.87446
P97467	Peptidyl-glycine alpha-amidating monooxygenase (PAM) [Includes: Peptidylglycine alpha-hydroxylating monooxygenase (PHM) (EC 1.14.17.3); Peptidyl-alpha-hydroxyglycine alpha-amidating lyase (EC 4.3.2.5) (Peptidylamidoglycolate lyase) (PAL)]	PAM	HEART	REGULATED	down	1.61198	1.8344	1.95106	0.616919	1.88744	0.879744	-1.496	-1.45101	-1.70093	0.710101	-0.432701	0.810295
Q9Z2P8	Vesicle-associated membrane protein 5 (VAMP-5) (Myobrevin)	VAMP5	HEART	REGULATED	down	-0.422105	-0.431231	-0.0478495	-0.665317	-0.93675	-0.587388	-1.19089	-1.2061	-1.13385	-1.51685	-1.69099	-1.89167
Q9CWE0	Mitochondrial fission regulator 1-like	MTFR1L	HEART	REGULATED	down	-1.96163	-2.25207	-1.57226	-2.57267	-2.95282	-2.37632	-3.15734	-3.36264	-2.55729	-3.3825	-3.13532	-3.45004
Q8CF94	Blood group Rh(D) polypeptide (Erythrocyte membrane glycoprotein Rh30) (CD antigen CD240D)	RHD	HEART	REGULATED	up	-2.71189	-2.17444	-1.55986	-2.09752	-0.674607	-2.52182	-3.58246	-4.22042	-2.85479	-0.0420603	-1.06544	-0.417342
Q9QZ85	Interferon-inducible GTPase 1 (EC 3.6.5.-)	IIGP1	HEART	REGULATED	down	0.448182	0.453874	0.636723	-1.24343	-0.946966	-0.881817	-1.43713	-1.50271	-1.53995	-1.05851	-0.620688	-0.879433
P19324	Serpin H1 (47 kDa heat shock protein) (Collagen-binding protein) (Colligin) (Serine protease inhibitor J6)	SERPINH1	HEART	REGULATED	down	1.87744	2.00547	2.13504	1.34505	1.38315	1.22498	0.92315	0.968555	0.963568	0.613518	0.65941	0.750452
Q32Q92	Acyl-coenzyme A thioesterase 6 (Acyl-CoA thioesterase 6) (EC 3.1.2.-)	ACOT6	HEART	REGULATED	up	1.95382	1.78963	1.83035	2.43984	2.5483	2.65258	2.77897	2.79869	2.83965	3.14419	3.39016	3.47553
Q8BGU5	Cyclin-Y (Cyclin fold protein 1)	CCNY	HEART	REGULATED	down	-1.50361	-1.21262	-1.40423	-2.32426	-1.85644	-1.76885	-2.42601	-2.63609	-3.75404	-3.07068	-3.00545	-2.16841
P43276	Histone H1.5 (H1 VAR.5) (H1b)	HIST1H1B	HEART	REGULATED	down	3.04918	2.94485	2.94512	1.45099	1.50036	1.71506	1.80692	1.83153	1.78649	1.46816	1.61719	1.89335
Q6ZQ93	Ubiquitin carboxyl-terminal hydrolase 34 (EC 3.4.19.12) (Deubiquitinating enzyme 34) (Ubiquitin thioesterase 34) (Ubiquitin-specific-processing protease 34)	USP34	HEART	REGULATED	down	-0.0470862	-0.0853545	-0.0249349	-0.17739	-0.209215	-0.121304	-0.492919	-0.413993	-0.467643	-1.58889	-1.39519	-1.13829
Q8CC88	von Willebrand factor A domain-containing protein 8	VWA8	HEART	REGULATED	up	1.64989	1.66727	1.7272	2.3015	2.44521	2.45494	2.43463	2.39033	2.36398	2.84248	3.16289	3.42478
O88186	Platelet glycoprotein IX (GP-IX) (GPIX) (Glycoprotein 9) (CD antigen CD42a)	GP9	HEART	REGULATED	down	0.502424	0.633959	0.484776	0.944965	1.04549	0.97604	-0.443259	-0.439556	-0.0493878	-0.85926	-0.789369	-0.637149
P50608	Fibromodulin (FM) (Collagen-binding 59 kDa protein) (Keratan sulfate proteoglycan fibromodulin) (KSPG fibromodulin)	FMOD	HEART	REGULATED	down	0.124081	0.36629	0.628645	-0.07823	-0.0546335	0.287858	-1.47423	-1.28791	-1.4199	-1.43061	-0.736414	-0.695602
P16332	Methylmalonyl-CoA mutase, mitochondrial (MCM) (EC 5.4.99.2) (Methylmalonyl-CoA isomerase)	MUT	HEART	REGULATED	up	1.10819	1.16899	1.20813	1.76818	1.78646	1.93335	1.90121	1.98283	1.92991	2.34567	2.82502	2.65273
P61222	ATP-binding cassette sub-family E member 1 (RNase L inhibitor) (Ribonuclease 4 inhibitor) (RNS4I)	ABCE1	HEART	REGULATED	down	1.72128	1.12682	1.82871	-0.00986255	-1.22209	-0.939328	0.920487	1.21152	1.08803	-0.959135	0.696231	0.570511
Q8R2G4	Ecto-ADP-ribosyltransferase 3 (EC 2.4.2.31) (ADP-ribosyltransferase C2 and C3 toxin-like 3) (ARTC3) (Mono(ADP-ribosyl)transferase 3) (NAD(P)(+)--arginine ADP-ribosyltransferase 3)	ART3	HEART	REGULATED	down	2.16296	2.26709	2.40983	1.24336	0.512095	1.53214	1.41879	1.41527	1.64325	-0.280903	1.61478	1.19647
P0C605	cGMP-dependent protein kinase 1 (cGK 1) (cGK1) (EC 2.7.11.12) (cGMP-dependent protein kinase I) (cGKI)	PRKG1	HEART	REGULATED	up	-1.86963	-2.74886	-2.71036	-2.46002	-2.04943	-1.77	-1.60064	-1.65108	-1.51697	-1.35023	-0.789415	-0.83179
Q8VCM8	Nicalin (Nicastrin-like protein)	NCLN	HEART	REGULATED	down	-1.19633	-0.835606	-1.31334	-2.66378	-6.13366	-1.88249	-1.4511	-1.28018	-1.87157	-15.9312	-0.949937	-1.59595
Q7TNG8	Probable D-lactate dehydrogenase, mitochondrial (DLD) (Lactate dehydrogenase D) (EC 1.1.2.4)	LDHD	HEART	REGULATED	up	-5.13036	-4.56815	-4.7671	-4.19157	-3.92815	-3.63902	-3.32471	-3.26159	-3.93014	-3.11609	-3.41574	-3.52151
P97298	Pigment epithelium-derived factor (PEDF) (Caspin) (Serpin F1) (Stromal cell-derived factor 3) (SDF-3)	SERPINF1	HEART	REGULATED	down	-0.100945	-0.0984545	0.248092	-0.815397	-1.33815	-0.654009	-1.56325	-1.78678	-0.935111	-2.65199	-0.737756	-0.826206
Q9JHU9	Inositol-3-phosphate synthase 1 (IPS 1) (EC 5.5.1.4) (Myo-inositol 1-phosphate synthase) (MI-1-P synthase) (MIP synthase)	ISYNA1	HEART	REGULATED	down	-4.1597	-7.18322	-7.56311	-7.81005	-10.0019	-7.82601	-5.16303	-3.85586	-7.80817	-8.63454	-10.5941	-4.31926
Q8CHT0	Delta-1-pyrroline-5-carboxylate dehydrogenase, mitochondrial (P5C dehydrogenase) (EC 1.2.1.88) (Aldehyde dehydrogenase family 4 member A1) (L-glutamate gamma-semialdehyde dehydrogenase)	ALDH4A1	HEART	REGULATED	up	2.37853	2.36997	2.44817	3.06259	3.06632	3.19665	3.20296	3.18693	3.13778	3.60986	3.8433	3.96429
P82350	Alpha-sarcoglycan (Alpha-SG) (50 kDa dystrophin-associated glycoprotein) (50DAG) (Adhalin)	SGCA	HEART	REGULATED	down	1.5834	1.47498	1.59191	1.01745	1.30361	1.44965	0.725553	0.860486	0.856384	0.139563	0.402598	0.277649
P26231	Catenin alpha-1 (102 kDa cadherin-associated protein) (Alpha E-catenin) (CAP102)	CTNNA1	HEART	REGULATED	down	2.52521	2.65039	2.73955	2.04615	1.81306	2.24235	1.80193	1.83974	2.0946	0.939651	1.41003	1.67176
Q9EPL9	Peroxisomal acyl-coenzyme A oxidase 3 (EC 1.3.3.6) (Branched-chain acyl-CoA oxidase) (BRCACox) (Pristanoyl-CoA oxidase)	ACOX3	HEART	REGULATED	up	-3.23402	-3.0123	-3.34534	-2.61184	-2.64591	-2.52653	-3.1165	-2.95488	-2.29141	-2.08321	-1.70466	-1.48942
Q99JI4	26S proteasome non-ATPase regulatory subunit 6 (26S proteasome regulatory subunit RPN7) (26S proteasome regulatory subunit S10) (p42A)	PSMD6	HEART	REGULATED	up	-4.65572	-4.60067	-4.22917	-5.4132	-4.51412	-4.44455	-4.71398	-4.3252	-5.57699	-3.51725	-3.02623	-2.64873
P97370	Sodium/potassium-transporting ATPase subunit beta-3 (Sodium/potassium-dependent ATPase subunit beta-3) (ATPB-3) (CD antigen CD298)	ATP1B3	HEART	REGULATED	down	-1.39303	-1.23923	-1.36153	-1.62086	-1.59318	-1.46522	-2.27354	-2.2851	-2.25204	-2.84419	-2.2692	-2.6843
P0DJE0	Protein PET100 homolog, mitochondrial	PET100	HEART	REGULATED	up	-5.59261	-5.92825	-7.6344	-5.24202	-4.36932	-5.79384	-5.71982	-5.93048	-5.44164	-5.60659	-4.45764	-4.1484
Q923D2	Flavin reductase (NADPH) (FR) (EC 1.5.1.30) (Biliverdin reductase B) (BVR-B) (EC 1.3.1.24) (Biliverdin-IX beta-reductase) (NADPH-dependent diaphorase) (NADPH-flavin reductase) (FLR)	BLVRB	HEART	REGULATED	up	-1.51155	-1.53636	-1.58133	-1.27509	-1.04508	-0.97804	-2.06595	-1.94639	-1.98845	-0.336639	-0.0791349	0.0382491
P56400	Platelet glycoprotein Ib beta chain (GP-Ib beta) (GPIb-beta) (GPIbB) (CD antigen CD42c)	GP1BB	HEART	REGULATED	down	0.660375	0.521251	1.05385	0.737034	1.35528	0.924325	-0.0377494	0.00748401	-0.0197679	-0.843631	-0.141429	-0.667559
Q8VE38	Oxidoreductase NAD-binding domain-containing protein 1 (EC 1.-.-.-)	OXNAD1	HEART	REGULATED	up	-0.530132	-0.139769	-0.326174	-0.355467	0.47613	0.377875	0.544313	0.473267	0.519052	0.95269	1.12219	1.21888
Q8VI36	Paxillin	PXN	HEART	REGULATED	up	-3.89049	-2.79619	-2.22606	-1.91129	-1.82192	-1.21071	-2.01502	-2.60856	-2.42771	-1.51417	-1.56149	-1.22259
Q9D273	Cob(I)yrinic acid a,c-diamide adenosyltransferase, mitochondrial (EC 2.5.1.17) (Cob(I)alamin adenosyltransferase) (Methylmalonic aciduria type B homolog)	MMAB	HEART	REGULATED	up	-0.438008	-0.749597	-0.420699	0.1232	0.1517	0.110414	-0.0523529	-0.136916	0.0703576	0.649751	0.92219	1.05492
Q91VM9	Inorganic pyrophosphatase 2, mitochondrial (EC 3.6.1.1) (Pyrophosphate phospho-hydrolase 2) (PPase 2)	PPA2	HEART	REGULATED	up	1.37927	1.27447	1.38138	2.02254	2.1579	2.08915	2.1117	2.02855	2.08537	2.55392	2.77568	2.87799
Q8VHY0	Chondroitin sulfate proteoglycan 4 (Chondroitin sulfate proteoglycan NG2) (Proteoglycan AN2)	CSPG4	HEART	REGULATED	down	-0.511678	-0.398687	-0.462577	-1.28552	-1.13331	-1.16356	-2.03685	-1.76674	-1.91302	-1.83605	-1.61589	-1.6592
Q9CZS1	Aldehyde dehydrogenase X, mitochondrial (EC 1.2.1.3) (Aldehyde dehydrogenase family 1 member B1)	ALDH1B1	HEART	REGULATED	down	0.913591	0.59943	0.793887	-0.619291	-0.814763	-0.390603	-0.989504	-0.608567	-1.86044	-1.05428	-0.126119	-0.363221
Q9Z2V4	Phosphoenolpyruvate carboxykinase, cytosolic [GTP] (PEPCK-C) (EC 4.1.1.32)	PCK1	HEART	REGULATED	down	1.34818	-1.85337	-6.12337	-4.13569	-5.75879	-5.62933	2.22484	3.13481	-2.24155	-6.74126	-6.31442	-0.151249
Q9QYA2	Mitochondrial import receptor subunit TOM40 homolog (Mitochondrial outer membrane protein of 35 kDa) (MOM35) (Protein Haymaker) (Translocase of outer membrane 40 kDa subunit homolog)	TOMM40	HEART	REGULATED	down	1.12985	0.985286	1.16248	0.127009	0.543908	0.48426	-0.545678	-0.646638	-0.759462	-0.0830179	-0.090463	-0.218716
A6H611	Mitochondrial intermediate peptidase (MIP) (EC 3.4.24.59)	MIPEP	HEART	REGULATED	up	-3.28375	-3.02898	-2.69774	-2.52369	-2.83159	-2.52417	-2.37912	-2.32485	-2.2421	-1.8499	-1.65602	-1.29091
Q9Z1T1	AP-3 complex subunit beta-1 (Adaptor protein complex AP-3 subunit beta-1) (Adaptor-related protein complex 3 subunit beta-1) (Beta-3A-adaptin) (Clathrin assembly protein complex 3 beta-1 large chain)	AP3B1	HEART	REGULATED	down	-1.57883	-2.24712	-2.14507	-2.23146	-2.235	-1.94336	-2.39522	-2.64375	-2.75895	-3.4454	-3.42864	-2.97921
P82347	Delta-sarcoglycan (Delta-SG) (35 kDa dystrophin-associated glycoprotein) (35DAG)	SGCD	HEART	REGULATED	down	1.6538	1.54049	1.64033	1.17164	1.42587	1.4551	0.872364	1.02396	0.982663	0.148165	0.481257	0.507391
P49222	Erythrocyte membrane protein band 4.2 (Erythrocyte protein 4.2) (P4.2)	EPB42	HEART	REGULATED	up	-2.14994	-2.00442	-2.3149	-1.43973	-1.70518	-1.02545	-3.95743	-3.20262	-3.63741	-0.839409	-0.859521	-0.585701
Q8K2C6	NAD-dependent protein deacylase sirtuin-5, mitochondrial (EC 3.5.1.-) (Regulatory protein SIR2 homolog 5) (SIR2-like protein 5)	SIRT5	HEART	REGULATED	up	0.373664	0.227645	0.479474	0.976641	0.93259	1.11245	1.01565	1.07325	0.883342	1.55474	1.73275	1.95499
Q9D172	ES1 protein homolog, mitochondrial	D10JHU81E	HEART	REGULATED	up	4.50515	4.48765	4.48927	5.19037	5.22031	5.40927	5.24173	5.22324	5.30263	5.68074	5.90279	6.00246
Q9QYY1	Interleukin-36 receptor antagonist protein (IL-36Ra) (Interleukin-1 HY1) (IL-1HY1) (Interleukin-1 delta) (IL-1 delta) (Interleukin-1 family member 5) (IL-1F5) (Interleukin-1 homolog 3) (IL-1H3) (Interleukin-1-like protein 1) (IL-1L1)	IL36RN	HEART	REGULATED	down	1.948	1.98655	2.00878	1.42546	1.41323	1.67734	1.8183	1.67662	1.63593	0.573123	0.76934	0.933953
Q61425	Hydroxyacyl-coenzyme A dehydrogenase, mitochondrial (HCDH) (EC 1.1.1.35) (Medium and short-chain L-3-hydroxyacyl-coenzyme A dehydrogenase) (Short-chain 3-hydroxyacyl-CoA dehydrogenase)	HADH	HEART	REGULATED	up	6.22856	6.61005	6.81923	7.10547	7.37119	7.37381	7.19285	7.22134	7.28495	7.92164	8.00129	7.90944
O35286	Pre-mRNA-splicing factor ATP-dependent RNA helicase DHX15 (EC 3.6.4.13) (DEAH box protein 15)	DHX15	HEART	REGULATED	down	-3.04627	-3.26858	-3.73931	-3.34426	-3.20358	-3.09526	-4.70661	-4.66105	-4.33647	-4.79844	-4.17925	-4.77958
Q9EQ20	Methylmalonate-semialdehyde dehydrogenase [acylating], mitochondrial (MMSDH) (Malonate-semialdehyde dehydrogenase [acylating]) (EC 1.2.1.18) (EC 1.2.1.27) (Aldehyde dehydrogenase family 6 member A1)	ALDH6A1	HEART	REGULATED	up	4.09364	4.11196	4.21853	4.85923	4.86251	5.05376	4.91947	4.96744	5.02516	5.33483	5.50717	5.6821
Q9QYB5	Gamma-adducin (Adducin-like protein 70)	ADD3	HEART	REGULATED	down	-0.992202	-1.20759	-1.33057	-1.86917	-1.49606	-1.37426	-2.54777	-2.30035	-2.07368	-2.47541	-2.49446	-2.23199
Q63850	Nuclear pore glycoprotein p62 (62 kDa nucleoporin) (Nucleoporin Nup62)	NUP62	HEART	REGULATED	down	-1.52989	-1.61506	-1.32266	-2.15403	-1.30941	-1.76188	-2.44822	-3.0953	-2.71987	-3.24795	-2.29769	-2.56654
Q9DBG3	AP-2 complex subunit beta (AP105B) (Adaptor protein complex AP-2 subunit beta) (Adaptor-related protein complex 2 subunit beta) (Beta-2-adaptin) (Beta-adaptin) (Clathrin assembly protein complex 2 beta large chain) (Plasma membrane adaptor HA2/AP2 adaptin beta subunit)	AP2B1	HEART	REGULATED	down	0.00212272	0.197193	0.155025	-0.59243	-1.13456	-0.167333	-0.85597	-0.948429	-0.39519	-1.88846	-0.574914	-0.946722
Q3V3R4	Integrin alpha-1 (CD49 antigen-like family member A) (Laminin and collagen receptor) (VLA-1) (CD antigen CD49a)	ITGA1	HEART	REGULATED	down	-1.5325	-1.56958	-1.76613	-1.71385	-2.00218	-1.26646	-2.4671	-2.35927	-1.87525	-3.47726	-2.73318	-2.4352
P12242	Mitochondrial brown fat uncoupling protein 1 (UCP 1) (Solute carrier family 25 member 7) (Thermogenin)	UCP1	HEART	REGULATED	up	-7.32361	-7.01067	-5.67148	-0.160863	0.282206	-0.128017	-7.79548	-7.74856	-5.4901	-5.0144	-6.01927	-4.49218
P35330	Intercellular adhesion molecule 2 (ICAM-2) (Lymphocyte function-associated AG-1 counter-receptor) (CD antigen CD102)	ICAM2	HEART	REGULATED	down	-0.46827	-0.357441	-0.354315	-0.615304	-0.442328	-0.297629	-0.721479	-0.644697	-0.807599	-1.74487	-1.62941	-1.41026
P04370	Myelin basic protein (MBP) (Myelin A1 protein)	MBP	HEART	REGULATED	down	-3.65567	-3.40003	-2.95807	-1.19914	-1.07312	-0.956868	-6.51656	-6.67617	-6.48106	-4.5656	-4.65316	-4.33351
P14733	Lamin-B1	LMNB1	HEART	REGULATED	down	-1.14256	-1.04933	-1.00178	-1.92702	-1.57425	-1.7532	-2.31423	-2.21619	-2.28141	-2.61726	-1.99782	-2.13207
Q8R0F8	Acylpyruvase FAHD1, mitochondrial (EC 3.7.1.5) (Fumarylacetoacetate hydrolase domain-containing protein 1) (Oxaloacetate decarboxylase) (OAA decarboxylase) (EC 4.1.1.3)	FAHD1	HEART	REGULATED	up	0.224793	0.353435	0.429975	0.649254	0.857821	0.841443	1.04661	1.14145	1.06169	1.60213	1.69023	1.78993
Q9DB60	Prostamide/prostaglandin F synthase (Prostamide/PG F synthase) (Prostamide/PGF synthase) (EC 1.11.1.20)	FAM213B	HEART	REGULATED	up	0.451784	0.360777	0.458078	0.731821	0.636577	0.774388	0.876874	1.06116	0.863578	1.55967	1.82954	1.93398
Q60870	Receptor expression-enhancing protein 5 (GP106) (Polyposis locus protein 1 homolog) (Protein TB2 homolog)	REEP5	HEART	REGULATED	down	-1.81773	-2.12852	-1.91542	-2.62324	-2.6963	-2.42188	-2.64533	-2.78614	-2.68172	-3.37747	-3.14198	-2.9369
Q7TMK6	Protein Hook homolog 2 (mHK2)	HOOK2	HEART	REGULATED	down	-0.859856	-0.798339	-0.967104	-1.65173	-1.25843	-1.48341	-2.14071	-2.1249	-2.3474	-2.45886	-1.58793	-2.08748
P46656	Adrenodoxin, mitochondrial (Adrenal ferredoxin) (Ferredoxin-1)	FDX1	HEART	REGULATED	up	-2.64877	-2.5695	-2.78167	-2.0163	-1.80069	-1.92703	-1.96826	-1.73018	-1.72138	-1.58893	-1.24303	-1.1276
Q99L13	3-hydroxyisobutyrate dehydrogenase, mitochondrial (HIBADH) (EC 1.1.1.31)	HIBADH	HEART	REGULATED	up	2.55208	2.54543	2.76144	3.31651	3.30233	3.34594	3.48654	3.51589	3.47817	3.76772	4.00125	4.13529
P42125	Enoyl-CoA delta isomerase 1, mitochondrial (EC 5.3.3.8) (3,2-trans-enoyl-CoA isomerase) (Delta(3),Delta(2)-enoyl-CoA isomerase) (D3,D2-enoyl-CoA isomerase) (Dodecenoyl-CoA isomerase)	ECI1	HEART	REGULATED	up	3.84736	3.80928	3.88846	4.45584	4.67002	4.6589	4.68489	4.69576	4.70183	5.02242	5.22883	5.30988
P09671	Superoxide dismutase [Mn], mitochondrial (EC 1.15.1.1)	SOD2	HEART	REGULATED	up	5.65101	5.58765	5.70152	5.96635	6.13624	6.18705	6.3631	6.42983	6.39067	6.87676	7.01898	7.06463
Q99KB8	Hydroxyacylglutathione hydrolase, mitochondrial (EC 3.1.2.6) (Glyoxalase II) (Glx II)	HAGH	HEART	REGULATED	up	-2.22955	-2.0783	-1.98573	-1.77155	-1.71243	-1.62541	-1.81887	-1.87835	-1.82194	-1.07022	-0.705394	-0.504718
O70433	Four and a half LIM domains protein 2 (FHL-2) (Skeletal muscle LIM-protein 3) (SLIM-3)	FHL2	HEART	REGULATED	down	0.309823	0.439082	0.341879	-0.550259	-0.582197	-0.479927	-0.387303	-0.231841	-0.28302	-1.09591	-0.697582	-0.610859
Q9CQW9	Interferon-induced transmembrane protein 3 (Dispanin subfamily A member 2b) (DSPA2b) (Fragilis protein) (Interferon-inducible protein 15) (Mouse ifitm-like protein 1) (Mil-1)	IFITM3	HEART	REGULATED	down	-0.397773	-0.397227	-1.06723	-0.948528	-1.25763	-0.769022	-1.73391	-2.06946	-1.9538	-1.90052	-2.15134	-1.42249
Q6ZWN5	40S ribosomal protein S9	RPS9	HEART	REGULATED	up	-1.85091	-1.66046	-1.96771	-1.78543	-1.36124	-1.50428	-1.67538	-1.20021	-1.20614	-0.565365	-0.327021	-0.601155
P29319	Ephrin type-A receptor 3 (EC 2.7.10.1) (EPH-like kinase 4) (EK4) (mEK4) (Tyrosine-protein kinase TYRO4) (Tyrosine-protein kinase receptor ETK1)	EPHA3	KIDNEY	REGULATED	up	-7.0832	-7.72523	-5.70812	-1.08256	-1.64237	-1.69212	-4.97479	-3.62205	-7.64828	-2.26063	-1.35113	-1.79719
O09126	Semaphorin-4D (M-Sema G) (Semaphorin-C-like 2) (Semaphorin-J) (Sema J) (CD antigen CD100)	SEMA4D	KIDNEY	REGULATED	up	-8.48372	-7.74544	-7.86708	-4.44104	-3.35902	-4.62542	-5.45824	-6.0391	-9.45144	-5.30938	-3.47078	-4.59481
P47955	60S acidic ribosomal protein P1	RPLP1	KIDNEY	REGULATED	up	-4.06274	-4.00293	-4.40878	-3.15456	-3.65309	-3.53219	-2.44317	-1.86375	-2.46623	-0.856695	-0.892032	-0.932204
Q66JS6	Eukaryotic translation initiation factor 3 subunit J-B (eIF3j-B) (Eukaryotic translation initiation factor 3 subunit 1-B) (eIF-3-alpha-B) (eIF3 p35)	EIF3J2	KIDNEY	REGULATED	up	-7.28997	-7.31866	-7.99236	-4.42606	-4.68874	-4.1911	-6.61178	-6.85953	-9.11083	-4.05859	-4.5221	-4.6594
Q91WC9	Sn1-specific diacylglycerol lipase beta (DGL-beta) (EC 3.1.1.-)	DAGLB	KIDNEY	REGULATED	down	-3.03819	-3.19071	-3.32258	-4.12564	-4.15178	-4.30801	-10.3967	-6.43644	-7.96639	-7.55261	-6.01907	-6.77247
Q5DU56	Protein NLRC3	NLRC3	KIDNEY	REGULATED	down	-1.51658	-1.52632	-1.32059	-1.55236	-1.77032	-1.6994	-3.00481	-2.89824	-2.49158	-5.21419	-4.83532	-5.04733
Q03517	Secretogranin-2 (Chromogranin-C) (Secretogranin II) (SgII) [Cleaved into: Secretoneurin (SN); Manserin]	SCG2	KIDNEY	REGULATED	down	-1.75239	-1.24409	-1.38162	-5.2699	-4.77909	-5.31478	-5.14825	-5.46575	-5.51173	-4.93752	-4.75696	-4.68802
Q9JHI2	tRNA-specific adenosine deaminase 1 (mADAT1) (EC 3.5.4.34) (tRNA-specific adenosine-37 deaminase)	ADAT1	KIDNEY	REGULATED	down	-1.77152	-1.77911	-4.6661	-4.84251	-5.52916	-5.7394	-8.21577	-5.15987	-4.58783	-5.07477	-8.31861	-7.74912
Q9R118	Serine protease HTRA1 (EC 3.4.21.-) (High-temperature requirement A serine peptidase 1) (Serine protease 11)	HTRA1	KIDNEY	REGULATED	up	-4.92004	-3.67672	-6.03533	-3.42491	-4.10823	-3.63333	-3.51457	-2.48191	-3.48523	-2.40314	-1.8654	-2.38883
Q68FF6	ARF GTPase-activating protein GIT1 (ARF GAP GIT1) (G protein-coupled receptor kinase-interactor 1) (GRK-interacting protein 1)	GIT1	KIDNEY	REGULATED	down	-1.40211	-1.07457	-2.13756	-8.32977	-2.4823	-4.62519	-0.992042	-1.07962	-1.63975	-9.08728	-9.56844	-1.78413
P62071	Ras-related protein R-Ras2	RRAS2	KIDNEY	REGULATED	up	-3.81305	-3.76887	-4.11055	-3.39344	-3.3943	-3.39218	-2.58636	-2.73391	-2.09032	-1.48689	-1.47744	-1.73489
Q9QXX8	Nuclear fragile X mental retardation-interacting protein 1 (Nuclear FMRP-interacting protein 1)	NUFIP1	KIDNEY	REGULATED	down	-2.18602	-2.0546	-1.91998	-3.69198	-5.32344	-5.82754	-4.24193	-4.9992	-4.30878	-3.97128	-7.93486	-5.07683
Q9D3H2	Odorant-binding protein 1a (Odorant-binding protein IA)	OBP1A	KIDNEY	REGULATED	down	0.595958	0.565436	0.647971	0.966685	0.641349	0.969151	-0.493865	-0.328744	-0.792391	-2.29996	-2.2221	-2.29777
O88477	Insulin-like growth factor 2 mRNA-binding protein 1 (IGF2 mRNA-binding protein 1) (IMP-1) (Coding region determinant-binding protein) (CRD-BP) (IGF-II mRNA-binding protein 1) (VICKZ family member 1) (Zipcode-binding protein 1) (ZBP-1)	IGF2BP1	KIDNEY	REGULATED	up	-4.32967	-4.30763	-3.69061	-2.61195	-3.00337	-2.85955	-2.92364	-2.55331	-2.28364	-2.05767	-1.65467	-2.15969
Q569L8	Centromere protein J (CENP-J)	CENPJ	KIDNEY	REGULATED	down	-0.759364	-0.67399	-0.580897	-0.657382	-0.747496	-0.596342	-2.12318	-1.85453	-1.51726	-3.48475	-3.26578	-3.88324
Q8BKE6	Cytochrome P450 20A1 (EC 1.14.-.-)	CYP20A1	KIDNEY	REGULATED	up	-0.767753	-0.557329	-0.446676	0.877418	0.578054	0.86581	1.48558	1.51235	1.52034	1.57866	1.68213	1.34428
O70400	PDZ and LIM domain protein 1 (C-terminal LIM domain protein 1) (Elfin) (LIM domain protein CLP-36)	PDLIM1	KIDNEY	REGULATED	up	-2.65378	-2.59192	-2.84465	-2.09258	-2.1444	-2.0049	-2.4099	-1.54271	-2.15466	-0.673225	-0.558179	-0.673196
P97372	Proteasome activator complex subunit 2 (11S regulator complex subunit beta) (REG-beta) (Activator of multicatalytic protease subunit 2) (Proteasome activator 28 subunit beta) (PA28b) (PA28beta)	PSME2	KIDNEY	REGULATED	up	-4.49666	-4.9727	-5.39378	-4.7514	-4.99833	-4.87341	-7.65596	-5.70218	-5.26377	-3.07403	-2.6046	-2.8477
Q60680	Inhibitor of nuclear factor kappa-B kinase subunit alpha (I-kappa-B kinase alpha) (IKK-A) (IKK-alpha) (IkBKA) (IkappaB kinase) (EC 2.7.11.10) (Conserved helix-loop-helix ubiquitous kinase) (I-kappa-B kinase 1) (IKK1) (Nuclear factor NF-kappa-B inhibitor kinase alpha) (NFKBIKA)	CHUK	KIDNEY	REGULATED	down	-2.2653	-2.24799	-2.25314	-2.59963	-2.72769	-2.98638	-6.13328	-4.4467	-5.82089	-5.35886	-4.51917	-5.147
Q9DBC7	cAMP-dependent protein kinase type I-alpha regulatory subunit [Cleaved into: cAMP-dependent protein kinase type I-alpha regulatory subunit, N-terminally processed]	PRKAR1A	KIDNEY	REGULATED	up	-5.32973	-6.35215	-6.07927	-5.7689	-6.72735	-6.65711	-5.14066	-5.04273	-8.06358	-3.48201	-3.41572	-4.57366
Q2VPQ9	Chromatin modification-related protein MEAF6 (MYST/Esa1-associated factor 6) (Esa1-associated factor 6 homolog) (Protein EAF6 homolog)	MEAF6	KIDNEY	REGULATED	down	-3.87842	-3.6996	-3.58064	-2.24738	-3.65701	-4.77088	-10.9426	-7.2376	-7.59981	-7.5216	-6.13928	-5.92644
P47963	60S ribosomal protein L13 (A52)	RPL13	KIDNEY	REGULATED	up	-3.22227	-3.20555	-3.05324	-3.36773	-2.94047	-3.19282	-3.20901	-2.14714	-2.52274	-1.30312	-1.13156	-1.17958
Q6PCL9	Poly(A) polymerase gamma (PAP-gamma) (EC 2.7.7.19) (Polynucleotide adenylyltransferase gamma) (SRP RNA 3'-adenylating enzyme) (Signal recognition particle RNA-adenylating enzyme) (SRP RNA-adenylating enzyme)	PAPOLG	KIDNEY	REGULATED	down	-2.01471	-2.12251	-2.48053	-3.30909	-3.16753	-3.63852	-8.80933	-5.75951	-6.88356	-4.98151	-5.0491	-4.60774
Q91XC9	Peroxisomal membrane protein PEX16 (Peroxin-16) (Peroxisomal biogenesis factor 16)	PEX16	KIDNEY	REGULATED	down	-3.29505	-3.26996	-3.31461	-10.4814	-4.78672	-6.2797	-4.98999	-6.78989	-5.67213	-6.23245	-5.96967	-5.52635
Q8BH53	Cilia- and flagella-associated protein 69	CFAP69	KIDNEY	REGULATED	down	-1.69591	-1.56444	-6.12337	-6.80468	-4.74007	-5.29409	-5.35343	-7.03036	-2.62112	-5.90295	-8.2827	-6.91923
Q6P5F9	Exportin-1 (Exp1) (Chromosome region maintenance 1 protein homolog)	XPO1	KIDNEY	REGULATED	up	-4.02063	-4.47059	-3.71369	-3.90969	-3.91998	-4.26504	-3.20912	-3.03216	-2.78526	-2.17886	-1.96897	-2.44534
Q9D7S9	Charged multivesicular body protein 5 (Chromatin-modifying protein 5) (SNF7 domain-containing protein 2)	CHMP5	KIDNEY	REGULATED	down	-3.86705	-3.22071	-3.27214	-3.21888	-3.72563	-2.8942	-7.29211	-4.78039	-4.27896	-5.65685	-6.52057	-6.3951
Q7TSG1	Centrosomal protein of 120 kDa (Cep120) (Coiled-coil domain-containing protein 100)	CEP120	KIDNEY	REGULATED	down	-4.15336	-4.23578	-4.28166	-3.93125	-4.52628	-4.75606	-8.69436	-7.52525	-7.89843	-8.51772	-6.12376	-6.32303
Q99KU0	Vacuole membrane protein 1 (NF-E2-inducible protein 2) (Protein ni-2) (Transmembrane protein 49)	VMP1	KIDNEY	REGULATED	down	-0.87879	-0.865963	-0.712186	-0.25318	-0.182256	-1.51548	-2.90271	-1.80253	-1.36325	-2.70539	-6.32342	-3.14064
Q3TCN2	Putative phospholipase B-like 2 (EC 3.1.1.-) (66.3 kDa protein) (76 kDa protein) (p76) (LAMA-like protein 2) (Lamina ancestor homolog 2) (Phospholipase B domain-containing protein 2) [Cleaved into: Putative phospholipase B-like 2 28 kDa form; Putative phospholipase B-like 2 40 kDa form; Putative phospholipase B-like 2 15 kDa form]	PLBD2	KIDNEY	REGULATED	up	-5.88233	-6.17866	-2.78347	-2.36444	-2.4266	-2.54281	-1.83349	-2.0795	-4.61667	-1.60585	-1.98295	-3.21751
Q9QWY8	Arf-GAP with SH3 domain, ANK repeat and PH domain-containing protein 1 (130 kDa phosphatidylinositol 4,5-bisphosphate-dependent ARF1 GTPase-activating protein) (ADP-ribosylation factor-directed GTPase-activating protein 1) (ARF GTPase-activating protein 1) (Development and differentiation-enhancing factor 1) (DEF-1) (Differentiation-enhancing factor 1) (PIP2-dependent ARF1 GAP)	ASAP1	KIDNEY	REGULATED	down	-0.0510488	-0.0419838	-0.14465	-0.53967	-0.611367	-0.78031	-2.09427	-1.5845	-2.01719	-2.62448	-2.50274	-2.7184
Q640L5	Coiled-coil domain-containing protein 18	CCDC18	KIDNEY	REGULATED	down	-2.1431	-2.02879	-1.9655	-2.53677	-2.33444	-2.75764	-5.78775	-3.77189	-5.14757	-4.96292	-4.11381	-4.32077
O35125	Leucine-rich repeat-containing protein 23 (Leucine-rich protein B7)	LRRC23	KIDNEY	REGULATED	down	-2.18567	-2.12699	-2.33583	-3.0316	-2.87807	-3.33453	-5.9485	-4.53529	-4.97993	-4.98827	-4.56723	-4.44671
Q64522	Histone H2A type 2-B (H2a-613A)	HIST2H2AB	KIDNEY	REGULATED	up	4.35953	4.38476	4.42424	4.67058	4.4469	4.44894	4.53039	5.09218	5.25611	6.11014	6.10652	5.70239
Q62523	Zyxin	ZYX	KIDNEY	REGULATED	up	-3.91815	-3.78527	-3.78364	-3.09975	-3.50363	-3.6528	-4.4119	-4.59	-4.90053	-3.58794	-0.213562	-0.42812
O54965	E3 ubiquitin-protein ligase RNF13 (EC 2.3.2.27) (RING finger protein 13) (RING-type E3 ubiquitin transferase RNF13)	RNF13	KIDNEY	REGULATED	up	-11.503	-11.9273	-4.70669	-4.57383	-5.06804	-4.31016	-6.51562	-7.45395	-8.34822	-5.9631	-7.96063	-5.83632
O09111	NADH dehydrogenase [ubiquinone] 1 beta subcomplex subunit 11, mitochondrial (Complex I-ESSS) (CI-ESSS) (NADH-ubiquinone oxidoreductase ESSS subunit) (Neuronal protein 15.6) (Np15.6) (p15.6)	NDUFB11	KIDNEY	REGULATED	down	0.978163	1.05597	1.16022	0.0857183	0.14939	-0.0159436	-1.52341	-0.483011	-0.687116	-1.3799	-1.19812	-1.45078
Q61206	Platelet-activating factor acetylhydrolase IB subunit beta (EC 3.1.1.47) (PAF acetylhydrolase 30 kDa subunit) (PAF-AH 30 kDa subunit) (PAF-AH subunit beta) (PAFAH subunit beta)	PAFAH1B2	KIDNEY	REGULATED	up	-4.10599	-4.26358	-3.95914	-3.31195	-3.70763	-4.07281	-4.46377	-3.54608	-3.05635	-2.65689	-2.44184	-2.69176
Q9CPX8	Cytochrome b-c1 complex subunit 10 (Complex III subunit 10) (Complex III subunit XI) (Ubiquinol-cytochrome c reductase complex 6.4 kDa protein)	UQCR11	KIDNEY	REGULATED	down	-3.34504	-3.29864	-7.59195	-9.17478	-9.14072	-8.66649	-9.82078	-8.8997	-5.75656	-5.16531	-9.13884	-9.17847
Q9Z1D1	Eukaryotic translation initiation factor 3 subunit G (eIF3g) (Eukaryotic translation initiation factor 3 RNA-binding subunit) (eIF-3 RNA-binding subunit) (Eukaryotic translation initiation factor 3 subunit 4) (eIF-3-delta) (eIF3 p42) (eIF3 p44)	EIF3G	KIDNEY	REGULATED	down	-3.79033	-4.04348	-4.1475	-6.26626	-6.4283	-5.83797	-7.63703	-7.71921	-6.30709	-8.79797	-6.03608	-5.31741
P46061	Ran GTPase-activating protein 1 (RanGAP1)	RANGAP1	KIDNEY	REGULATED	up	-3.54028	-3.02776	-3.20094	-3.04369	-3.44653	-3.12607	-2.81217	-2.19671	-2.6628	-1.82123	-1.54883	-1.80971
Q6NS60	F-box only protein 41	FBXO41	KIDNEY	REGULATED	up	-2.04285	-2.06277	-1.53487	-0.562661	-1.43687	-0.933126	-2.98086	-1.63315	-3.33632	-0.70884	0.595819	-0.68023
Q9NYQ2	Hydroxyacid oxidase 2 (HAOX2) (EC 1.1.3.15) ((S)-2-hydroxy-acid oxidase, peroxisomal) (Medium chain alpha-hydroxy acid oxidase) (Medium-chain L-2-hydroxy acid oxidase)	HAO2	KIDNEY	REGULATED	up	3.35789	3.43422	3.5554	4.80228	4.54775	4.45274	4.40275	4.80492	4.62337	4.94989	5.01974	4.65988
O08582	GTP-binding protein 1 (G-protein 1) (GP-1) (GP1)	GTPBP1	KIDNEY	REGULATED	up	-2.71765	-2.67588	-2.28917	-1.80761	-2.20911	-2.18665	-1.2193	-1.15683	-1.21525	-0.799447	-0.996102	-1.54915
Q8BLK9	Ribosomal protein S6 kinase delta-1 (S6K-delta-1) (EC 2.7.11.1) (52 kDa ribosomal protein S6 kinase)	RPS6KC1	KIDNEY	REGULATED	up	-3.0724	-2.97621	-2.87025	-2.29719	-2.6026	-2.53713	-3.15127	-1.90345	-2.29427	-1.4732	-1.59227	-1.66608
Q925E7	Serine/threonine-protein phosphatase 2A 55 kDa regulatory subunit B delta isoform (PP2A subunit B isoform B55-delta) (PP2A subunit B isoform PR55-delta) (PP2A subunit B isoform R2-delta) (PP2A subunit B isoform delta)	PPP2R2D	KIDNEY	REGULATED	down	-4.65592	-3.48504	-4.07144	-6.17359	-5.0822	-4.06096	-3.62298	-5.65506	-3.73779	-6.84069	-5.31044	-7.07332
P10637	Microtubule-associated protein tau (Neurofibrillary tangle protein) (Paired helical filament-tau) (PHF-tau)	MAPT	KIDNEY	REGULATED	up	-3.01528	-2.7859	-3.04832	-2.11034	-2.5387	-2.43256	-1.75143	-1.48739	-1.42919	-1.52932	-1.58935	-1.71393
Q9ESB3	Histidine-rich glycoprotein (Histidine-proline-rich glycoprotein) (HPRG)	HRG	KIDNEY	REGULATED	up	-1.13173	-1.02093	-0.879357	-0.375294	-0.665944	-0.306996	-0.931428	-0.241161	-0.19559	0.297863	0.458214	0.221396
O08696	Forkhead box protein M1 (Forkhead homolog 16) (Winged-helix transcription factor Trident)	FOXM1	KIDNEY	REGULATED	up	-0.0672074	-0.049613	-0.0410969	0.551157	0.405849	0.0704892	-0.224961	-0.748963	-0.649661	0.901553	1.70409	1.3307
Q64478	Histone H2B type 1-H (h2B-221)	HIST1H2BH	KIDNEY	REGULATED	up	-3.38779	-3.3442	-3.05822	-2.12249	-1.654	-1.90831	-0.134942	-1.94127	-2.36176	-1.46885	-2.56362	-1.07011
Q9CQ91	NADH dehydrogenase [ubiquinone] 1 alpha subcomplex subunit 3 (Complex I-B9) (CI-B9) (NADH-ubiquinone oxidoreductase B9 subunit)	NDUFA3	KIDNEY	REGULATED	down	1.29556	1.76766	2.02279	1.3335	1.02119	0.62828	1.15002	0.50075	0.557138	-0.516982	-0.129517	-0.818937
P63087	Serine/threonine-protein phosphatase PP1-gamma catalytic subunit (PP-1G) (EC 3.1.3.16) (Protein phosphatase 1C catalytic subunit)	PPP1CC	KIDNEY	REGULATED	up	-0.0491115	-0.221263	-0.130926	1.35489	2.26157	2.73313	1.49551	1.78001	-0.00877789	2.06773	0.963561	0.71953
Q8VCF0	Mitochondrial antiviral-signaling protein (MAVS) (CARD adapter inducing interferon beta) (Cardif) (Interferon beta promoter stimulator protein 1) (IPS-1) (Virus-induced-signaling adapter) (VISA)	MAVS	KIDNEY	REGULATED	up	-3.11635	-3.08817	-3.16351	-2.23972	-2.29492	-2.55719	-2.6224	-2.61046	-2.50581	-1.91878	-1.64144	-1.89412
Q9ET30	Transmembrane 9 superfamily member 3	TM9SF3	KIDNEY	REGULATED	down	1.11031	0.821774	0.773448	0.598348	0.439345	0.539351	-0.974291	-0.710995	-0.474898	-0.78636	-1.27405	-1.66649
P16014	Secretogranin-1 (Chromogranin-B) (CgB) (Secretogranin I) (SgI) [Cleaved into: CCB peptide; PE-11]	CHGB	KIDNEY	REGULATED	down	-1.42342	-1.43053	-1.37606	-3.35571	-3.41225	-3.50497	-2.23623	-3.04116	-2.43794	-3.1908	-3.36784	-4.1047
Q03958	Prefoldin subunit 6 (Protein Ke2)	PFDN6	KIDNEY	REGULATED	up	-2.46201	-2.22971	-2.02336	-1.54247	-1.66852	-1.83565	-1.58552	-1.58243	-1.31687	-1.01003	-0.886326	-1.10658
Q9DCU6	39S ribosomal protein L4, mitochondrial (L4mt) (MRP-L4)	MRPL4	KIDNEY	REGULATED	down	-0.636726	-0.673592	-0.869924	-0.905725	-0.796975	-1.32766	-5.85164	-3.52432	-4.34002	-3.02859	-2.86714	-2.61383
Q9Z2H5	Band 4.1-like protein 1 (Neuronal protein 4.1) (4.1N)	EPB41L1	KIDNEY	REGULATED	up	-1.57242	-1.56852	-1.40707	-0.613211	-1.07084	-0.735352	-0.261324	-0.661679	-0.447877	-0.216344	-0.0573191	-0.575156
Q9EPX2	Papilin	PAPLN	KIDNEY	REGULATED	up	-1.12144	-1.15854	-1.1703	-0.78382	-0.732287	-1.16034	-3.17815	-1.71102	-1.98728	-0.210262	0.458109	0.111458
O35660	Glutathione S-transferase Mu 6 (EC 2.5.1.18) (GST class-mu 6) (Glutathione-S-transferase class M5)	GSTM6	KIDNEY	REGULATED	down	-2.30953	-2.30496	-2.28028	-3.2384	-2.23513	-6.85416	-5.75246	-5.18947	-4.78151	-4.23609	-4.7953	-4.18748
P62852	40S ribosomal protein S25	RPS25	KIDNEY	REGULATED	down	-1.37041	-1.66039	-1.5853	-2.11588	-2.5957	-2.84203	-3.61027	-2.39555	-3.92714	-3.28196	-3.42926	-3.98482
Q4VBD9	GDNF-inducible zinc finger protein 1 (Zinc finger protein 336)	GZF1	KIDNEY	REGULATED	down	-1.33438	-1.79347	-1.75222	-1.71704	-2.07132	-1.95688	-2.8616	-2.19551	-2.32751	-3.84746	-3.48242	-3.63641
P14246	Solute carrier family 2, facilitated glucose transporter member 2 (Glucose transporter type 2, liver) (GLUT-2)	SLC2A2	KIDNEY	REGULATED	down	-0.484567	-0.491925	-0.570537	-0.409014	-0.591225	-0.657581	-1.71538	-1.75293	-1.35526	-2.806	-2.30533	-2.46623
Q8VHE0	Translocation protein SEC63 homolog	SEC63	KIDNEY	REGULATED	up	-4.66909	-4.8607	-4.04189	-3.34598	-3.20173	-3.76661	-5.44418	-4.71931	-5.71103	-3.32659	-3.25537	-3.32987
Q61001	Laminin subunit alpha-5 (Laminin-10 subunit alpha) (Laminin-11 subunit alpha) (Laminin-15 subunit alpha)	LAMA5	KIDNEY	REGULATED	down	0.0322645	0.400642	-0.149748	-2.17463	-0.157902	-1.18594	-2.13957	-1.39417	-0.227213	-2.75907	-0.859944	-2.34414
Q8C3X2	Coiled-coil domain-containing protein 90B, mitochondrial	CCDC90B	KIDNEY	REGULATED	down	-0.989774	-0.891891	-0.793484	-1.24152	-1.42734	-1.71444	-3.52588	-1.87961	-2.14922	-2.53207	-3.0657	-3.01646
P43276	Histone H1.5 (H1 VAR.5) (H1b)	HIST1H1B	KIDNEY	REGULATED	down	2.4586	2.46701	2.40574	1.86665	1.81223	1.53689	-0.672646	0.472997	-0.157807	0.359718	0.647054	0.486847
Q9Z211	Peroxisomal membrane protein 11A (Peroxin-11A) (Peroxisomal biogenesis factor 11A) (Protein PEX11 homolog alpha) (PEX11-alpha)	PEX11A	KIDNEY	REGULATED	down	-1.80492	-1.62661	-1.74041	-0.83124	-1.04891	-1.26371	-2.59906	-2.36262	-1.93103	-3.46007	-3.67703	-3.84867
P10493	Nidogen-1 (NID-1) (Entactin)	NID1	KIDNEY	REGULATED	up	1.55052	1.56571	1.92613	2.74117	2.25826	2.26037	2.21234	2.8179	2.63939	3.08857	2.68392	2.72056
O70433	Four and a half LIM domains protein 2 (FHL-2) (Skeletal muscle LIM-protein 3) (SLIM-3)	FHL2	KIDNEY	REGULATED	up	-3.44525	-3.98582	-3.56963	-2.6757	-3.00697	-2.78541	-3.96567	-2.79658	-3.73048	-2.51778	-2.39184	-2.62842
Q9EPR5	VPS10 domain-containing receptor SorCS2	SORCS2	KIDNEY	REGULATED	down	-0.75225	-0.727289	-0.6939	-2.79877	-1.74667	-2.41717	-5.01637	-4.08332	-3.80864	-3.39203	-2.267	-2.50814
P18608	Non-histone chromosomal protein HMG-14 (High mobility group nucleosome-binding domain-containing protein 1)	HMGN1	KIDNEY	REGULATED	up	-0.940013	-0.96254	-0.925206	-0.810816	-0.109681	-0.357654	0.28801	-0.948932	-0.743662	0.196775	0.0333413	0.421601
P03911	NADH-ubiquinone oxidoreductase chain 4 (EC 1.6.5.3) (NADH dehydrogenase subunit 4)	MTND4	KIDNEY	REGULATED	down	0.499877	0.643636	0.66956	-1.28873	-0.189433	-0.213287	0.0949471	-0.490688	0.0955306	-0.979854	-1.74619	-1.39416
Q6PDM4	Interactor of HORMAD1 protein 1 (Coiled-coil domain-containing protein 36)	CCDC36	KIDNEY	REGULATED	down	-1.7953	-1.80657	-1.82877	-2.11163	-2.0791	-2.57729	-8.06538	-4.96838	-5.62792	-4.43861	-3.31449	-3.63809
P21278	Guanine nucleotide-binding protein subunit alpha-11 (G alpha-11) (G-protein subunit alpha-11)	GNA11	KIDNEY	REGULATED	down	-0.402751	-0.395809	-1.18747	-0.22487	-2.00937	-0.850687	-2.10261	-3.84372	-0.366964	-3.19661	-2.55	-2.34825
Q9D898	Actin-related protein 2/3 complex subunit 5-like protein (Arp2/3 complex 16 kDa subunit 2) (ARC16-2)	ARPC5L	KIDNEY	REGULATED	up	-1.23206	-1.18064	-1.10121	-0.387433	-0.655472	-0.519845	-0.51828	-0.257677	-0.379314	0.0267539	0.0422286	-0.328588
Q9CY28	GTP-binding protein 8	GTPBP8	KIDNEY	REGULATED	up	-3.33712	-3.22429	-3.1584	-2.67405	-2.38225	-2.44307	-2.33944	-2.96696	-2.23159	-2.23463	-2.01336	-2.17843
Q6P069	Sorcin	SRI	KIDNEY	REGULATED	up	-2.97025	-2.99296	-3.10317	-2.8128	-2.58636	-2.97335	-3.77554	-2.92309	-3.47106	-1.92832	-1.79436	-2.07629
Q9D2I5	LisH domain-containing protein ARMC9	ARMC9	KIDNEY	REGULATED	down	-2.08448	-1.96311	-2.97334	-2.2332	-2.33998	-2.43756	-5.41106	-3.21803	-3.62971	-4.83848	-4.11471	-4.09556
Q8BVY0	Ribosomal L1 domain-containing protein 1	RSL1D1	KIDNEY	REGULATED	up	-6.90922	-8.23736	-4.22489	-4.2168	-3.05394	-3.68066	-4.31659	-6.18435	-10.1032	-4.7648	-4.34338	-4.76954
Q9QXY9	Peroxisomal biogenesis factor 3 (Peroxin-3) (Peroxisomal assembly protein PEX3)	PEX3	KIDNEY	REGULATED	down	-0.552694	-0.74998	-0.406093	-0.26899	-0.673068	-0.546295	-1.10106	-1.29622	-0.745212	-2.1802	-2.41452	-2.82885
Q9CQB2	MAPK regulated corepressor interacting protein 2 (Protein FAM195A)	MCRIP2	KIDNEY	REGULATED	down	-3.14767	-3.18805	-3.29537	-4.26895	-3.79723	-4.30789	-8.26193	-5.56707	-6.92541	-5.44661	-4.90528	-5.04785
Q9DC69	NADH dehydrogenase [ubiquinone] 1 alpha subcomplex subunit 9, mitochondrial (Complex I-39kD) (CI-39kD) (NADH-ubiquinone oxidoreductase 39 kDa subunit)	NDUFA9	KIDNEY	REGULATED	down	2.89342	2.8943	2.46853	1.52087	1.84276	1.34905	0.5514	0.70661	1.97679	0.59956	0.775002	1.02934
P51885	Lumican (Keratan sulfate proteoglycan lumican) (KSPG lumican)	LUM	KIDNEY	REGULATED	up	0.549908	0.368165	0.723663	0.739114	0.705079	0.581219	0.731417	1.20619	1.0456	1.6138	1.7582	1.4636
Q8CDN6	Thioredoxin-like protein 1 (32 kDa thioredoxin-related protein)	TXNL1	KIDNEY	REGULATED	up	-2.20471	-2.13694	-2.06124	-1.66024	-1.96365	-1.98694	-1.51835	-1.45143	-0.866313	-1.10304	-0.960574	-1.15499
G5E829	Plasma membrane calcium-transporting ATPase 1 (PMCA1) (EC 3.6.3.8) (Plasma membrane calcium ATPase isoform 1) (Plasma membrane calcium pump isoform 1)	ATP2B1	KIDNEY	REGULATED	down	2.94536	2.97529	3.08981	2.77271	2.94376	2.25716	0.376652	0.326456	-0.513136	0.442794	1.65991	1.21777
Q9D5S7	Leucine-rich repeat and guanylate kinase domain-containing protein	LRGUK	KIDNEY	REGULATED	down	-4.31106	-4.34098	-4.37286	-4.77613	-4.71721	-5.12749	-8.31197	-6.02827	-7.08834	-6.40351	-6.14069	-6.05265
Q8BFP9	[Pyruvate dehydrogenase (acetyl-transferring)] kinase isozyme 1, mitochondrial (EC 2.7.11.2) (Pyruvate dehydrogenase kinase isoform 1) (PDH kinase 1)	PDK1	KIDNEY	REGULATED	up	-2.01152	-2.23409	-1.90011	-1.68507	-2.09913	-1.77747	-0.258401	-1.01913	-2.11807	-1.04999	-0.762345	-1.1784
O35593	26S proteasome non-ATPase regulatory subunit 14 (EC 3.4.19.-) (26S proteasome regulatory subunit RPN11) (MAD1)	PSMD14	KIDNEY	REGULATED	up	-2.24195	-1.90008	-1.65613	-1.13014	-1.28229	-1.98538	-1.64585	-1.57209	-1.54215	-0.944565	-0.63645	-1.06014
P61358	60S ribosomal protein L27	RPL27	KIDNEY	REGULATED	up	-3.07204	-3.17968	-3.07169	-3.27987	-3.25744	-3.55022	-4.72028	-3.27252	-3.62528	-2.23408	-1.81692	-2.14074
Q99JH8	ER lumen protein-retaining receptor 1 (KDEL endoplasmic reticulum protein retention receptor 1) (KDEL receptor 1)	KDELR1	KIDNEY	REGULATED	down	-2.78166	-2.78699	-2.93225	-3.47854	-3.21713	-4.08944	-8.28005	-5.37676	-7.16393	-5.12663	-4.52119	-4.47242
Q3UM45	Protein phosphatase 1 regulatory subunit 7 (Protein phosphatase 1 regulatory subunit 22)	PPP1R7	KIDNEY	REGULATED	down	2.08442	2.27847	1.80833	0.94003	2.29736	2.03643	1.73888	1.28432	0.765509	-0.584436	0.586817	0.44748
Q9EPQ8	Transcription factor 20 (TCF-20) (Nuclear factor SPBP) (Stromelysin-1 PDGF-responsive element-binding protein) (SPRE-binding protein)	TCF20	KIDNEY	REGULATED	down	0.561475	0.60821	0.541218	0.384439	0.372931	0.0781148	-3.64584	-1.447	-2.64314	-1.78044	-1.039	-1.07045
P55096	ATP-binding cassette sub-family D member 3 (68 kDa peroxisomal membrane protein) (PMP68) (70 kDa peroxisomal membrane protein) (PMP70)	ABCD3	KIDNEY	REGULATED	down	3.32671	3.27212	3.18949	3.24776	3.01266	2.77059	1.31726	1.72539	1.8444	1.50204	1.52785	1.36175
O70577	Solute carrier family 22 member 2 (Organic cation transporter 2)	SLC22A2	KIDNEY	REGULATED	down	0.608258	0.729631	0.791651	0.837749	0.607065	0.607436	-0.33844	-0.0312482	0.0530659	-1.15126	-0.851928	-1.26828
P70168	Importin subunit beta-1 (Karyopherin subunit beta-1) (Nuclear factor p97) (Pore targeting complex 97 kDa subunit) (PTAC97) (SCG)	KPNB1	KIDNEY	REGULATED	up	-0.00365612	0.210376	0.310749	0.836901	0.62406	0.58489	0.946399	1.00574	1.18318	1.19231	1.3579	1.01235
O35600	Retinal-specific ATP-binding cassette transporter (ATP-binding cassette sub-family A member 4) (RIM ABC transporter) (RIM protein) (RmP)	ABCA4	KIDNEY	REGULATED	up	-7.61177	-8.08087	-3.38669	-3.38325	-3.15404	-4.03915	-4.49599	-4.53416	-9.4942	-6.17908	-4.36597	-3.73714
P97314	Cysteine and glycine-rich protein 2 (Cysteine-rich protein 2) (CRP2) (Double LIM protein 1) (DLP-1)	CSRP2	KIDNEY	REGULATED	up	0.17489	0.11099	0.148635	0.642736	0.612729	0.25379	-1.27518	-0.0696409	-0.836135	0.932949	1.4507	1.11568
Q9WVD4	H(+)/Cl(-) exchange transporter 5 (Chloride channel protein 5) (ClC-5) (Chloride transporter ClC-5)	CLCN5	KIDNEY	REGULATED	down	-3.17705	-3.238	-3.14722	-3.51272	-3.55391	-3.92345	-6.63621	-4.74203	-5.75764	-5.82884	-4.48735	-4.82223
P23798	Polycomb group RING finger protein 2 (DNA-binding protein Mel-18) (Melanoma nuclear protein 18) (RING finger protein 110) (Zinc finger protein 144) (Zfp-144)	PCGF2	KIDNEY	REGULATED	down	-1.42959	-1.25406	-1.4101	-2.20918	-2.39462	-2.2023	-2.91807	-2.23375	-2.3339	-2.99843	-3.02418	-3.3947
Q8BJ34	Meiosis arrest female protein 1 (Limkain-b1)	MARF1	KIDNEY	REGULATED	down	-0.00258361	-0.0763302	-0.0411818	-0.324077	-0.235073	-0.929225	-2.3541	-1.72881	-2.08083	-1.88818	-1.59303	-1.95301
Q9CQ92	Mitochondrial fission 1 protein (FIS1 homolog) (Tetratricopeptide repeat protein 11) (TPR repeat protein 11)	FIS1	KIDNEY	REGULATED	down	-0.691465	-0.693939	-0.709016	-0.69423	-0.883203	-1.22514	-3.01842	-2.02623	-2.73228	-2.79708	-2.2628	-2.41133
Q9CQC9	GTP-binding protein SAR1b	SAR1B	KIDNEY	REGULATED	down	-0.354978	-0.330278	0.0537842	-1.78481	-0.38902	-1.41763	-2.50265	-2.12425	-2.22181	-2.18179	-1.9354	-1.89512
P57722	Poly(rC)-binding protein 3 (Alpha-CP3)	PCBP3	KIDNEY	REGULATED	up	-3.66633	-3.64581	-3.50421	-2.19202	-3.23611	-2.84067	-2.80537	-3.3145	-3.52594	-2.96497	-1.92329	-2.78627
P46935	E3 ubiquitin-protein ligase NEDD4 (EC 2.3.2.26) (HECT-type E3 ubiquitin transferase NEDD4) (Neural precursor cell expressed developmentally down-regulated protein 4) (NEDD-4)	NEDD4	KIDNEY	REGULATED	up	-1.65769	-1.63645	-1.51885	-0.66695	-1.23126	-1.12907	-1.19434	-0.777247	-0.998374	-0.656889	-0.295441	-0.890604
Q91YN0	Protein C12orf4 homolog	D6WSU163E	KIDNEY	REGULATED	up	-8.17966	-7.52875	-8.12529	-5.51532	-7.49976	-5.38291	-4.80741	-5.01771	-7.04373	-8.67135	-5.15246	-5.0881
Q3UVG3	Protein FAM91A1	FAM91A1	KIDNEY	REGULATED	up	-3.41043	-3.15032	-2.96175	-2.88115	-2.97941	-3.18269	-3.52214	-2.77228	-2.93876	-2.07384	-1.94138	-2.50768
A2AN08	E3 ubiquitin-protein ligase UBR4 (EC 2.3.2.27) (N-recognin-4) (RING-type E3 ubiquitin transferase UBR4) (Zinc finger UBR1-type protein 1) (p600)	UBR4	KIDNEY	REGULATED	down	-1.59797	-1.57888	-1.57301	-1.9684	-1.86758	-2.21577	-6.07559	-4.49534	-5.21098	-3.81429	-3.10538	-3.2254
P40201	Chromodomain-helicase-DNA-binding protein 1 (CHD-1) (EC 3.6.4.12) (ATP-dependent helicase CHD1)	CHD1	KIDNEY	REGULATED	down	0.855246	0.814219	0.785575	-0.0660627	0.128077	-0.027368	-3.3396	-2.30275	-3.15895	-1.60999	-0.813576	-0.658824
Q8R0Y8	Mitochondrial coenzyme A transporter SLC25A42 (Solute carrier family 25 member 42)	SLC25A42	KIDNEY	REGULATED	down	-0.102855	-0.0819968	-0.335275	-0.220038	-1.16286	-0.603785	-1.96197	-1.45264	-0.25816	-2.3561	-1.78652	-1.81151
O88531	Palmitoyl-protein thioesterase 1 (PPT-1) (EC 3.1.2.22) (Palmitoyl-protein hydrolase 1)	PPT1	KIDNEY	REGULATED	up	0.362978	0.345978	0.529637	1.20469	0.886606	0.992109	1.90274	1.42875	1.32109	1.49758	1.52003	1.11889
Q7TQK5	Coiled-coil domain-containing protein 93	CCDC93	KIDNEY	REGULATED	down	-4.49595	-4.3034	-4.26892	-7.3727	-5.66821	-8.76169	-5.92852	-7.70309	-6.40705	-5.33476	-10.0239	-5.70614
Q9DCT8	Cysteine-rich protein 2 (CRP-2) (Heart LIM protein)	CRIP2	KIDNEY	REGULATED	up	-0.150728	-0.0923638	0.0509982	0.767076	0.489759	0.489926	0.901364	0.878686	0.944602	0.920685	1.02952	0.724789
Q9QXL2	Kinesin-like protein KIF21A	KIF21A	KIDNEY	REGULATED	up	-2.71912	-2.81062	-2.415	-1.83469	-2.1759	-2.39975	-1.68985	-1.30665	-1.76206	-1.6822	-1.37697	-1.95713
Q9CWG8	Protein arginine methyltransferase NDUFAF7, mitochondrial (EC 2.1.1.320) (NADH dehydrogenase [ubiquinone] complex I, assembly factor 7) (Protein midA homolog)	NDUFAF7	KIDNEY	REGULATED	down	-1.75528	-1.63115	-1.85392	-1.50867	-1.17838	-2.27627	-3.65733	-2.38406	-1.94178	-3.3021	-4.67346	-3.04447
Q8BG81	Polymerase delta-interacting protein 3 (S6K1 Aly/REF-like target) (SKAR)	POLDIP3	KIDNEY	REGULATED	up	-1.28825	-1.4342	-1.45534	-0.613683	-1.18438	-0.607279	-0.0926079	-0.218592	-0.00383969	-0.350507	-0.28602	-0.684457
P62322	U6 snRNA-associated Sm-like protein LSm5	LSM5	KIDNEY	REGULATED	down	-2.62082	-2.10104	-1.88591	-4.44903	-3.68791	-3.16752	-2.81381	-2.92623	-2.40558	-2.78042	-3.87536	-5.74906
Q9DC07	LIM zinc-binding domain-containing Nebulette (Actin-binding Z-disk protein)	NEBL	KIDNEY	REGULATED	up	-1.50095	-1.38218	-1.50855	-1.00992	-1.09169	-0.842261	-1.06146	-0.441259	-0.617792	-0.488484	-0.299536	-0.804248
Q08091	Calponin-1 (Basic calponin) (Calponin H1, smooth muscle)	CNN1	KIDNEY	REGULATED	up	1.04097	0.975603	1.00164	1.46813	1.29957	1.39227	0.734564	1.49299	1.21094	1.96135	1.98146	1.86068
O70305	Ataxin-2 (Spinocerebellar ataxia type 2 protein homolog)	ATXN2	KIDNEY	REGULATED	up	-0.771257	-0.794121	-0.591418	0.227509	-0.340502	-0.401312	1.15011	0.511197	0.569121	0.397964	0.384334	-0.133526
Q61790	Lymphocyte activation gene 3 protein (LAG-3) (CD antigen CD223)	LAG3	KIDNEY	REGULATED	up	-2.27546	-2.2498	-2.12556	-1.45804	-1.80381	-1.97614	-2.62194	-3.46454	-3.31562	-1.84577	0.284582	-1.5188
O35744	Chitinase-like protein 3 (EC 3.2.1.52) (Beta-N-acetylhexosaminidase Ym1) (Chitinase-3-like protein 3) (ECF-L) (Eosinophil chemotactic cytokine) (Secreted protein Ym1)	CHIL3	KIDNEY	REGULATED	up	-0.98211	-0.735852	-0.818711	-0.150474	-0.472447	-0.654231	0.0474367	0.592983	0.692131	0.150921	0.227227	-0.198348
P62305	Small nuclear ribonucleoprotein E (snRNP-E) (Sm protein E) (Sm-E) (SmE)	SNRPE	KIDNEY	REGULATED	up	0.14568	0.265869	0.398015	0.591259	0.364592	0.227289	0.282023	1.04054	0.47702	1.2626	1.38342	0.906141
Q9CR21	Acyl carrier protein, mitochondrial (ACP) (CI-SDAP) (NADH-ubiquinone oxidoreductase 9.6 kDa subunit)	NDUFAB1	KIDNEY	REGULATED	down	-0.870845	-1.02992	-1.16094	-1.92749	-1.85486	-2.04384	-4.72433	-2.92398	-3.52821	-2.79773	-2.59236	-2.77015
Q8VC69	Solute carrier family 22 member 6 (Kidney-specific transport protein) (Novel kidney transcript) (mNKT) (Organic anion transporter 1) (Renal organic anion transporter 1) (mROAT1)	SLC22A6	KIDNEY	REGULATED	down	-0.442999	-0.307715	-0.25577	-0.49799	-0.7346	-0.652123	-1.32148	-0.923441	-1.08584	-1.91335	-1.99705	-2.12525
Q62093	Serine/arginine-rich splicing factor 2 (Protein PR264) (Putative myelin regulatory factor 1) (MRF-1) (Splicing component, 35 kDa) (Splicing factor SC35) (SC-35) (Splicing factor, arginine/serine-rich 2)	SRSF2	KIDNEY	REGULATED	down	1.09182	1.16139	1.25901	0.950771	0.496177	0.552505	-0.100274	0.23988	0.252708	-0.317759	-0.233317	-0.943833
Q80XU3	Nuclear ubiquitous casein and cyclin-dependent kinase substrate 1 (JC7)	NUCKS1	KIDNEY	REGULATED	up	-2.09575	-2.37967	-2.7551	-1.70339	-2.54167	-2.4097	-4.44663	-3.70804	-3.89222	-1.84054	-1.11516	-1.37674
P09925	Surfeit locus protein 1	SURF1	KIDNEY	REGULATED	down	-0.130649	-0.0434706	0.119778	-0.0695911	-0.550298	-0.359747	-0.562088	-0.442814	-0.447593	-1.44455	-1.68109	-1.90689
Q9JLF6	Protein-glutamine gamma-glutamyltransferase K (EC 2.3.2.13) (Epidermal TGase) (Transglutaminase K) (TG(K)) (TGK) (TGase K) (Transglutaminase-1) (TGase-1)	TGM1	KIDNEY	REGULATED	down	-0.975603	-0.867301	-0.894464	-0.990657	-1.09984	-1.06595	-1.73535	-1.34305	-1.47698	-2.43989	-2.34609	-2.93812
Q3UPY5	Beta-galactosidase-1-like protein 2 (EC 3.2.1.-)	GLB1L2	KIDNEY	REGULATED	down	-4.34274	-3.48737	-3.10841	-5.90123	-4.73198	-4.02165	-4.07112	-4.06349	-3.47219	-4.68812	-4.61344	-7.67829
Q69ZA1	Cyclin-dependent kinase 13 (EC 2.7.11.22) (EC 2.7.11.23) (CDC2-related protein kinase 5) (Cell division cycle 2-like protein kinase 5) (Cell division protein kinase 13)	CDK13	KIDNEY	REGULATED	up	-4.71655	-4.41778	-4.59646	-5.43403	-4.97948	-4.69688	-5.9726	-3.87412	-3.40879	-3.8727	-2.65909	-4.22425
Q9DB32	Hydroxyacylglutathione hydrolase-like protein (EC 3.1.2.-)	HAGHL	KIDNEY	REGULATED	down	-2.00132	-1.98095	-1.97386	-2.40475	-2.36632	-2.81461	-6.36291	-4.71874	-4.88522	-3.87414	-3.50221	-3.52815
P52480	Pyruvate kinase PKM (EC 2.7.1.40) (Pyruvate kinase muscle isozyme)	PKM	KIDNEY	REGULATED	up	3.05082	3.08744	3.20188	3.97508	3.59197	3.64283	3.80278	4.05544	4.09673	4.06049	4.11308	3.73706
Q99LC9	Peroxisome assembly factor 2 (PAF-2) (Peroxin-6) (Peroxisomal biogenesis factor 6) (Peroxisomal-type ATPase 1)	PEX6	KIDNEY	REGULATED	down	-0.253865	-0.160933	-0.203638	0.0757235	-0.368532	-0.18749	-1.38262	-1.40629	-0.511798	-1.77216	-1.72681	-1.98692
Q9JIQ3	Diablo homolog, mitochondrial (Direct IAP-binding protein with low pI) (Second mitochondria-derived activator of caspase) (Smac)	DIABLO	KIDNEY	REGULATED	down	-2.55825	-2.62782	-2.54767	-6.39158	-2.98635	-7.17907	-4.58395	-5.07185	-4.40308	-4.631	-3.84081	-4.17871
P14148	60S ribosomal protein L7	RPL7	KIDNEY	REGULATED	down	-2.32758	-2.21191	-2.64414	-8.52664	-4.02239	-5.17418	-5.19152	-9.65855	-3.94407	-3.50206	-4.14632	-4.41601
F8VPN2	Testis-expressed protein 15	TEX15	KIDNEY	REGULATED	down	-1.33429	-1.38253	-1.76574	-2.57338	-2.57713	-2.94593	-6.72354	-3.87373	-4.83796	-3.4519	-3.10285	-2.8997
Q8BVI5	Syntaxin-16	STX16	KIDNEY	REGULATED	up	-3.67125	-1.7182	-0.719194	0.381972	-0.836121	-0.316289	-1.87966	-3.0054	-0.814031	-0.694443	-0.00413956	-1.49664
O88441	Metaxin-2 (Mitochondrial outer membrane import complex protein 2)	MTX2	KIDNEY	REGULATED	down	0.131782	0.168345	0.133192	-0.256643	-0.392263	-0.977843	-1.8587	-0.805783	-2.11627	-1.50318	-1.09472	-1.76716
Q62381	Tolloid-like protein 1 (mTll) (EC 3.4.24.-)	TLL1	KIDNEY	REGULATED	down	-4.14656	-4.0367	-4.0036	-5.73762	-4.66275	-4.71548	-7.51554	-6.31067	-8.19542	-6.50566	-5.25216	-5.45824
Q8VI47	Canalicular multispecific organic anion transporter 1 (ATP-binding cassette sub-family C member 2)	ABCC2	KIDNEY	REGULATED	down	-1.81829	-1.78474	-1.83332	-0.73371	-1.12131	-1.18835	-3.13723	-1.83353	-2.11075	-3.32819	-3.57413	-3.38698
P17665	Cytochrome c oxidase subunit 7C, mitochondrial (Cytochrome c oxidase polypeptide VIIc)	COX7C	KIDNEY	REGULATED	down	0.210234	0.1985	0.227057	-0.838233	-0.96022	-0.57899	-1.3243	-0.51582	-0.757265	-1.3425	-1.25455	-1.51765
P20852	Cytochrome P450 2A5 (EC 1.14.14.1) (CYPIIA5) (Coumarin 7-hydroxylase) (Cytochrome P450-15-COH) (Cytochrome P450-IIA3.2)	CYP2A5	KIDNEY	REGULATED	up	1.71164	1.73719	1.8396	2.63361	2.32844	2.28678	3.10886	2.92309	2.38839	2.63871	2.67901	2.43593
Q9D824	Pre-mRNA 3'-end-processing factor FIP1 (FIP1-like 1 protein)	FIP1L1	KIDNEY	REGULATED	up	-2.36508	-1.77341	-1.74782	-0.571306	-1.34754	-0.738733	-1.39757	-1.0581	-0.678108	-0.392561	-1.37582	-1.37117
Q78IK2	Up-regulated during skeletal muscle growth protein 5 (Diabetes-associated protein in insulin-sensitive tissues)	USMG5	KIDNEY	REGULATED	down	0.302605	0.334337	0.268016	-0.0263654	-0.105944	-0.321337	-2.90527	-1.0581	-2.41155	-1.44173	-1.08129	-1.29502
P06683	Complement component C9	C9	KIDNEY	REGULATED	down	-3.93122	-3.67847	-3.56134	-3.34985	-3.59001	-3.78446	-5.719	-4.68587	-4.61295	-5.11241	-5.7432	-5.18707
Q8C3K5	Transmembrane protein 72	TMEM72	KIDNEY	REGULATED	down	-1.51469	-1.42002	-1.62646	-0.441245	-3.2843	-0.84461	-1.12759	-1.90615	-1.29002	-1.98222	-4.01045	-3.62042
Q9D0M0	Exosome complex exonuclease RRP42 (Exosome component 7) (Ribosomal RNA-processing protein 42)	EXOSC7	KIDNEY	REGULATED	up	-3.60843	-3.38502	-3.4356	-2.50969	-3.20613	-2.712	-5.42871	-1.85045	-4.91468	-2.67655	-2.71924	-2.61871
Q9CQJ1	HIG1 domain family member 2A	HIGD2A	KIDNEY	REGULATED	down	-4.0122	-3.44884	-3.52194	-5.14851	-6.40618	-5.8663	-5.21493	-5.12065	-4.22677	-4.15441	-4.63282	-8.4999
P28798	Granulins (PC cell-derived growth factor) (PCDGF) (Proepithelin) (PEPI) [Cleaved into: Acrogranin (Progranulin); Granulin-1; Granulin-2; Granulin-3; Granulin-4; Granulin-5; Granulin-6; Granulin-7]	GRN	KIDNEY	REGULATED	up	-0.739903	-0.633896	-0.52618	0.226314	0.0491781	0.28767	0.42567	0.504472	0.540877	0.257789	0.285872	-0.0554634
O55236	mRNA-capping enzyme (HCE) (MCE1) [Includes: Polynucleotide 5'-triphosphatase (TPase) (mRNA 5'-triphosphatase) (EC 3.1.3.33); mRNA guanylyltransferase (EC 2.7.7.50) (GTP--RNA guanylyltransferase) (GTase)]	RNGTT	KIDNEY	REGULATED	up	-2.35755	-2.56871	-2.39271	-1.27523	-1.72176	-2.16145	-2.39612	-1.2755	-1.99263	-1.33447	-1.5906	-1.96907
Q8CGN5	Perilipin-1 (Lipid droplet-associated protein) (Perilipin A)	PLIN1	KIDNEY	REGULATED	up	-1.13892	-1.15452	-1.27673	-0.8346	-0.939578	-1.19802	-2.65141	-1.94168	-2.35007	-0.304334	-0.343525	-0.564008
P56812	Programmed cell death protein 5 (TF-1 cell apoptosis-related protein 19) (Protein TFAR19)	PDCD5	KIDNEY	REGULATED	up	-1.6826	-1.45007	-1.66233	-1.11736	-1.29568	-1.09682	-1.48078	-0.504852	-1.59232	-1.01613	-0.726135	-0.58272
P11152	Lipoprotein lipase (LPL) (EC 3.1.1.34)	LPL	KIDNEY	REGULATED	down	-0.625743	-0.439631	-0.400757	-0.360152	-0.634722	-0.665947	-1.46393	-1.38864	-1.32618	-1.99026	-1.7354	-2.32357
Q8BTW9	Serine/threonine-protein kinase PAK 4 (EC 2.7.11.1) (p21-activated kinase 4) (PAK-4)	PAK4	KIDNEY	REGULATED	up	-3.03228	-2.1738	-2.08154	-1.55776	-1.73553	-1.77219	-1.57403	-1.68891	-1.31718	-1.27284	-1.9157	-1.39315
Q6PFR5	Transformer-2 protein homolog alpha (TRA-2 alpha) (TRA2-alpha) (Transformer-2 protein homolog A)	TRA2A	KIDNEY	REGULATED	down	-3.20636	-2.98994	-3.28026	-3.66678	-3.57042	-3.87993	-6.42115	-4.35557	-5.65541	-4.90075	-4.53495	-4.69333
P27546	Microtubule-associated protein 4 (MAP-4)	MAP4	KIDNEY	REGULATED	up	0.102166	0.0947132	0.148164	0.756592	0.163173	0.45757	1.19652	1.23708	1.35448	0.893125	1.17768	0.623472
Q9CQZ6	NADH dehydrogenase [ubiquinone] 1 beta subcomplex subunit 3 (Complex I-B12) (CI-B12) (NADH-ubiquinone oxidoreductase B12 subunit)	NDUFB3	KIDNEY	REGULATED	down	0.675598	0.685126	0.682753	0.108962	0.0151484	-0.222362	-2.44903	-1.4984	-2.06439	-1.10993	-0.582078	-0.89498
Q8K0C4	Lanosterol 14-alpha demethylase (LDM) (EC 1.14.13.70) (CYPLI) (Cytochrome P450 51A1) (Cytochrome P450-14DM) (Cytochrome P45014DM) (Cytochrome P450LI) (Sterol 14-alpha demethylase)	CYP51A1	KIDNEY	REGULATED	down	1.0475	1.13837	0.851728	1.28079	0.132052	0.56371	-0.849132	-0.404731	0.701986	-0.763032	-0.349895	-0.502456
Q76LS9	Ubiquitin carboxyl-terminal hydrolase MINDY-1 (EC 3.4.19.12) (Deubiquitinating enzyme MINDY-1) (NF-E2 inducible protein) (Protein FAM63A)	FAM63A	KIDNEY	REGULATED	up	-2.64703	-2.71504	-1.8668	-1.68748	-2.03414	-2.0365	-1.05229	-1.15779	-1.17276	-1.55397	-1.22639	-1.90896
Q9D0I9	Arginine--tRNA ligase, cytoplasmic (EC 6.1.1.19) (Arginyl-tRNA synthetase) (ArgRS)	RARS	KIDNEY	REGULATED	up	-1.75605	-1.66976	-2.01873	-1.40494	-1.64991	-1.71427	-0.433279	-0.906423	-1.16156	-0.934374	-0.908627	-1.28161
P68373	Tubulin alpha-1C chain (Alpha-tubulin 6) (Alpha-tubulin isotype M-alpha-6) (Tubulin alpha-6 chain) [Cleaved into: Detyrosinated tubulin alpha-1C chain]	TUBA1C	KIDNEY	REGULATED	up	2.35947	2.46566	2.53221	3.38566	3.0908	2.85226	2.69287	2.83903	2.77815	3.27335	3.34521	3.02295
Q99LC3	NADH dehydrogenase [ubiquinone] 1 alpha subcomplex subunit 10, mitochondrial (Complex I-42kD) (CI-42kD) (NADH-ubiquinone oxidoreductase 42 kDa subunit)	NDUFA10	KIDNEY	REGULATED	down	2.99609	3.00306	2.9214	2.37747	2.15802	1.86689	1.34295	2.05192	2.0807	1.30804	1.79674	1.26158
Q91XD4	Formimidoyltransferase-cyclodeaminase (Formiminotransferase-cyclodeaminase) (FTCD) [Includes: Glutamate formimidoyltransferase (EC 2.1.2.5) (Glutamate formiminotransferase) (Glutamate formyltransferase); Formimidoyltetrahydrofolate cyclodeaminase (EC 4.3.1.4) (Formiminotetrahydrofolate cyclodeaminase)]	FTCD	KIDNEY	REGULATED	up	-5.54112	-5.45634	-5.35436	-4.23532	-4.36533	-4.06805	-3.15824	-2.96312	-3.12478	-5.21639	-4.54767	-3.95899
Q7TMF3	NADH dehydrogenase [ubiquinone] 1 alpha subcomplex subunit 12 (Complex I-B17.2) (CI-B17.2) (CIB17.2) (NADH-ubiquinone oxidoreductase subunit B17.2)	NDUFA12	KIDNEY	REGULATED	down	1.31974	1.43816	1.46669	0.968148	0.689256	0.508674	-0.0304579	0.151958	0.404733	-0.0615464	0.0646089	-0.274682
P21995	Embigin (Teratocarcinoma glycoprotein Gp-70)	EMB	KIDNEY	REGULATED	down	-1.67797	-1.516	-1.59944	-1.31802	-1.65943	-1.33215	-1.44672	-1.67974	-1.42562	-3.24688	-2.96615	-3.04949
Q9JL35	High mobility group nucleosome-binding domain-containing protein 5 (Nucleosome-binding protein 1) (Nucleosome-binding protein 45) (NBP-45) (Protein GARP45)	HMGN5	KIDNEY	REGULATED	up	0.594243	0.690843	0.684761	1.24858	0.923835	1.02313	1.40033	1.54414	1.63028	1.41651	1.53435	1.23067
Q9R0I7	YLP motif-containing protein 1 (Nuclear protein ZAP3)	YLPM1	KIDNEY	REGULATED	up	-1.926	-1.74631	-1.91006	-1.41882	-1.96759	-1.69174	-1.39422	-1.3028	-0.947208	-0.877609	-1.18881	-1.28293
Q91XU3	Phosphatidylinositol 5-phosphate 4-kinase type-2 gamma (EC 2.7.1.149) (Phosphatidylinositol 5-phosphate 4-kinase type II gamma) (PI(5)P 4-kinase type II gamma) (PIP4KII-gamma)	PIP4K2C	KIDNEY	REGULATED	up	-0.36872	-0.233425	-0.220958	0.0346344	-0.0395722	-0.0566726	-0.102853	0.189244	0.491057	0.500348	0.742524	0.154085
Q8CHY6	Transcriptional repressor p66 alpha (GATA zinc finger domain-containing protein 2A)	GATAD2A	KIDNEY	REGULATED	up	-1.18403	-1.28988	-1.25292	-0.791637	-1.04291	-1.01508	-1.10037	-0.84337	-0.982326	-0.568042	-0.264654	-0.664886
Q62318	Transcription intermediary factor 1-beta (TIF1-beta) (E3 SUMO-protein ligase TRIM28) (EC 2.3.2.27) (KRAB-A-interacting protein) (KRIP-1) (RING-type E3 ubiquitin transferase TIF1-beta) (Tripartite motif-containing protein 28)	TRIM28	KIDNEY	REGULATED	up	0.546452	0.78585	0.667982	1.04381	0.673364	0.7484	0.965122	1.51826	1.40966	1.47088	1.51753	1.19359
Q5HZI9	Solute carrier family 25 member 51 (Mitochondrial carrier triple repeat protein 1)	SLC25A51	KIDNEY	REGULATED	down	-1.42383	-1.59128	-1.70764	-2.42639	-2.48252	-2.34818	-2.577	-2.47908	-1.95425	-3.17885	-3.21624	-2.91188
Q3V0C5	Ubiquitin carboxyl-terminal hydrolase 48 (EC 3.4.19.12) (Deubiquitinating enzyme 48) (Ubiquitin thioesterase 48) (Ubiquitin-specific-processing protease 48)	USP48	KIDNEY	REGULATED	up	-4.61831	-5.16536	-4.83943	-4.9214	-4.94043	-5.20263	-5.26251	-5.04598	-4.61314	-4.00694	-3.91257	-4.41005
Q925B0	PRKC apoptosis WT1 regulator protein (Prostate apoptosis response 4 protein) (Par-4)	PAWR	KIDNEY	REGULATED	up	-1.32279	-1.30778	-1.28725	-1.25747	-1.22974	-1.4635	-1.72079	-1.4355	-1.12095	-0.796952	-0.320928	-0.573238
P09602	Non-histone chromosomal protein HMG-17 (High mobility group nucleosome-binding domain-containing protein 2)	HMGN2	KIDNEY	REGULATED	up	1.63169	1.61233	1.79219	1.42874	2.39518	2.02718	2.0036	1.18863	0.941881	2.45825	2.24288	2.5899
P28661	Septin-4 (Brain protein H5) (Peanut-like protein 2)	SEPT4	KIDNEY	REGULATED	up	-2.11992	-2.07697	-2.04976	-1.59185	-1.81459	-1.61193	-1.69213	-1.55582	-1.63349	-1.40253	-1.27041	-1.3865
Q80TF3	Protocadherin-19	PCDH19	KIDNEY	REGULATED	down	-4.17066	-3.84662	-7.1359	-5.14598	-6.49214	-5.33781	-8.72355	-5.62419	-5.27886	-5.43657	-8.61747	-6.54982
P18608	Hmgn1	HMGN1	LIVER	REGULATED	down	-5.51029	-5.94699	-5.68834	-12.6935	-13.123	-12.4306	-10.3946	-12.0946	-9.49649	-11.1984	-12.1435	-10.6449
Q9Z2A9	Gamma-glutamyltransferase 5 (GGT 5) (EC 2.3.2.2) (Gamma-glutamyl leukotrienase) (GGL) (Gamma-glutamyltransferase-like activity 1) (Gamma-glutamyltranspeptidase 5) (Glutathione hydrolase 5) (EC 3.4.19.13) (Leukotriene-C4 hydrolase) (EC 3.4.19.14) [Cleaved into: Gamma-glutamyltransferase 5 heavy chain; Gamma-glutamyltransferase 5 light chain]	GGT5	LIVER	REGULATED	up	-10.079	-5.6147	-5.85738	-3.12815	-3.16105	-3.16426	-1.3817	-1.22951	-1.60218	1.20857	1.2606	1.15609
Q3U1G5	Interferon-stimulated 20 kDa exonuclease-like 2 (EC 3.1.-.-)	ISG20L2	LIVER	REGULATED	down	0.209645	0.214912	0.179328	-3.08055	-3.04121	-3.18949	-7.15655		-5.98747	-2.83262	-2.91189	-2.75947
P84228	Histone H3.2	HIST1H3B; HIST1H3C; HIST1H3D; HIST1H3E; HIST1H3F; HIST2H3B; HIST2H3C1; HIST2H3C2	LIVER	REGULATED	down	6.42212	4.94904	5.7489	1.7523	1.15444	2.10643	6.30551	0.336477	7.46172	2.4453	2.57737	2.30406
P00688	Pancreatic alpha-amylase (PA) (EC 3.2.1.1) (1,4-alpha-D-glucan glucanohydrolase)	AMY2	LIVER	REGULATED	down	2.23196	2.36242	2.37519	1.36412	1.34576	1.31392	-0.865099	-0.696655	-1.11232	-0.354287	-0.432984	-0.281634
Q80V03	Uncharacterized aarF domain-containing protein kinase 5 (EC 2.7.11.-)	ADCK5	LIVER	REGULATED	up	-6.07373	-7.48919	-7.43177	-5.05121	-5.26137	-4.93568	-2.12084	-1.98691	-2.31223	-0.599281	-0.626384	-0.573391
P37804	Transgelin (Actin-associated protein p27) (Smooth muscle protein 22-alpha) (SM22-alpha)	TAGLN	LIVER	REGULATED	down	-0.418568	-0.574638	-0.835441	-5.82452	-5.61723	-6.13581	-4.49048	-4.37049	-4.66027	-3.43133	-4.40271	-2.86895
Q6ZPQ6	Membrane-associated phosphatidylinositol transfer protein 2 (Drosophila retinal degeneration B homolog 2) (RdgB2) (Phosphatidylinositol transfer protein, membrane-associated 2) (PITPnm 2) (Pyk2 N-terminal domain-interacting receptor 3) (NIR-3)	PITPNM2	LIVER	REGULATED	down	-0.68506	-0.308129	-0.409671	-3.94602	-3.67342	-4.35191	-6.15027	-8.26141	-5.18009	-3.16312	-3.15459	-3.17146
P97386	DNA ligase 3 (EC 6.5.1.1) (DNA ligase III) (Polydeoxyribonucleotide synthase [ATP] 3)	LIG3	LIVER	REGULATED	down	-4.59966	-4.46993	-4.00932	-3.30409	-3.20999	-3.47345	-4.54668	-4.13237	-5.32947	-6.70866	-5.77301	-9.86729
P35762	CD81 antigen (26 kDa cell surface protein TAPA-1) (Target of the antiproliferative antibody 1) (CD antigen CD81)	CD81	LIVER	REGULATED	up	-3.7466	-3.04994	-4.16396	-1.22391	-1.1505	-1.36985	1.86677	2.03143	1.62584	2.85247	2.86172	2.84342
Q9JJJ3	Aquaporin-9 (AQP-9) (Aquaglyceroporin-9)	AQP9	LIVER	REGULATED	up	-8.75233	-8.18159	-7.58316	-6.50006	-6.98937	-6.20277	-2.56098	-2.54941	-2.57927	-1.59601	-1.5739	-1.61786
Q91VC9	Growth hormone-inducible transmembrane protein (Mitochondrial morphology and cristae structure 1) (MICS1)	GHITM	LIVER	REGULATED	up	-6.51857	-7.23451	-7.21866	-4.59488	-4.44935	-4.82562	-1.53658	-1.56379	-1.50681	-0.558335	-0.482511	-0.636137
Q08091	Calponin-1 (Basic calponin) (Calponin H1, smooth muscle)	CNN1	LIVER	REGULATED	down	1.38049	1.22228	1.74065	-3.95429	-3.96775	-4.00929	-3.2687	-3.31476	-3.21658	-1.06612	-0.924875	-1.21824
Q8VDP4	Cell cycle and apoptosis regulator protein 2 (Cell division cycle and apoptosis regulator protein 2)	CCAR2	LIVER	REGULATED	down	-2.13208	-2.06564	-1.68721	-1.13604	-1.09536	-1.24639	-2.29797	-2.35762	-2.2301	-4.33258	-4.37759	-4.2901
Q99JY8	Phospholipid phosphatase 3 (EC 3.1.3.4) (Lipid phosphate phosphohydrolase 3) (PAP2-beta) (Phosphatidate phosphohydrolase type 2b) (Phosphatidic acid phosphatase 2b) (PAP-2b) (PAP2b)	PLPP3	LIVER	REGULATED	up	-7.55551	-6.0376	-4.76928	-3.23459	-3.33201	-3.21145	-1.66898	-1.3772	-2.14888	0.0834139	0.0648402	0.101258
P70665	Sialate O-acetylesterase (EC 3.1.1.53) (Sialic acid-specific 9-O-acetylesterase) (Yolk sac protein 2) [Cleaved into: Sialate O-acetylesterase small subunit; Sialate O-acetylesterase large subunit]	SIAE	LIVER	REGULATED	down	0.500577	0.28859	0.305263	-2.11084	-2.02035	-2.27606	-2.40738	-3.89465	-1.55746	-1.91702	-1.78171	-2.0621
Q6QNU9	Toll-like receptor 12	TLR12	LIVER	REGULATED	down	0.896177	1.0549	0.905992	-1.93493	-1.95669	-1.98181	-3.71121	-4.39854	-3.15374	-1.27253	-1.14444	-1.40911
Q9CPX8	Cytochrome b-c1 complex subunit 10 (Complex III subunit 10) (Complex III subunit XI) (Ubiquinol-cytochrome c reductase complex 6.4 kDa protein)	UQCR11	LIVER	REGULATED	up	-5.30416	-7.43163	-2.82359	-2.85842	-3.44832	-2.50824	-1.5746	-0.749768	-6.52348	0.686435	0.74195	0.630295
Q9JHD2	Histone acetyltransferase KAT2A (EC 2.3.1.48) (General control of amino acid synthesis protein 5-like 2) (Histone acetyltransferase GCN5) (MmGCN5) (Lysine acetyltransferase 2A)	KAT2A	LIVER	REGULATED	down	3.37191	3.29094	3.27636	0.612792	0.635639	0.521134	-1.55519	-1.56725	-1.54384	1.11887	1.12666	1.11126
Q9ESW4	Acylglycerol kinase, mitochondrial (EC 2.7.1.107) (EC 2.7.1.94) (Multiple substrate lipid kinase) (MuLK) (Multi-substrate lipid kinase)	AGK	LIVER	REGULATED	up	-6.12406	-4.29701	-4.27245	-3.05589	-3.2608	-2.94437	-0.651655	-0.771976	-0.517311	0.933135	0.928287	0.937837
Q8BXB6	Solute carrier organic anion transporter family member 2B1 (Solute carrier family 21 member 9)	SLCO2B1	LIVER	REGULATED	up	-7.58094	-7.76194	-5.60944	-5.83247	-5.73736	-6.00297	0.105469	0.760517	-1.73906	-1.09035	-0.987893	-1.19755
Q9R1S7	Multidrug resistance-associated protein 6 (ATP-binding cassette sub-family C member 6)	ABCC6	LIVER	REGULATED	up	-7.61913	-4.8025	-4.75118	-4.45995	-4.65314	-4.35751	-1.78531	-1.55127	-2.14914	0.139938	0.156172	0.123967
Q811S7	Upstream-binding protein 1 (Nuclear factor 2d9) (NF2d9)	UBP1	LIVER	REGULATED	down	-1.79869	-3.69068	-2.79185	-2.14233	-2.22473	-2.13252	-3.22631	-3.44429	-2.99619	-4.92824	-4.78501	-5.08272
Q9Z210	Peroxisomal membrane protein 11B (Peroxin-11B) (Peroxisomal biogenesis factor 11B) (Protein PEX11 homolog beta) (PEX11-beta)	PEX11B	LIVER	REGULATED	up	-5.75959	-6.37041	-7.23989	-5.63091	-6.0615	-5.36724	-3.07645	-3.23191	-2.90616	-1.04735	-1.00026	-1.09469
Q9CYS6	Uncharacterized protein C2orf72 homolog	C2ORF72	LIVER	REGULATED	up	-5.49868	-4.75252	-3.55034	-3.14461	-3.19861	-3.16079	-1.22079	-1.70534	-0.783115	1.1795	1.19461	1.16465
Q91V81	RNA-binding protein 42 (RNA-binding motif protein 42)	RBM42	LIVER	REGULATED	down	-2.16182	-2.31722	-1.78854	-1.85522	-1.9286	-1.85357	-2.68189	-2.58708	-2.81402	-4.13855	-3.94728	-4.35268
Q9D1R1	Complex I assembly factor TMEM126B, mitochondrial (Transmembrane protein 126B)	TMEM126B	LIVER	REGULATED	up	-3.69218	-5.73034	-5.79797	-3.42337	-3.64967	-3.29564	-0.849947	-0.880561	-0.816088	0.315273	0.237173	0.387403
Q8C1Q6	Small integral membrane protein 4 (Small nucleolar RNA host gene 8)	SMIM4	LIVER	REGULATED	up	-8.14997	-7.30034	-7.94896	-6.27965	-6.41397	-6.22481	-2.69827	-2.80699	-2.57618	-2.25849	-2.22903	-2.28775
B2RXS4	Plexin-B2	PLXNB2	LIVER	REGULATED	up	-6.14823	-4.95485	-4.87449	-3.36262	-3.2726	-3.52729	-1.03874	-0.835779	-1.34548	0.230251	0.219152	0.240969
P31651	Sodium- and chloride-dependent betaine transporter (Na(+)/Cl(-) betaine/GABA transporter) (Sodium- and chloride-dependent GABA transporter 2) (GAT-2) (Solute carrier family 6 member 12)	SLC6A12	LIVER	REGULATED	up	-3.03875	-3.94888	-4.01696	-3.41412	-3.2196	-3.70811	0.318364	-0.0129796	0.645165	1.59288	1.59414	1.59166
P48410	ATP-binding cassette sub-family D member 1 (Adrenoleukodystrophy protein) (ALDP)	ABCD1	LIVER	REGULATED	up	-3.29092	-4.95839	-2.94769	-3.71318	-3.97891	-3.55664	-1.65731	-1.52637	-1.84402	1.59197	1.6264	1.55767
O35218	Cleavage and polyadenylation specificity factor subunit 2 (Cleavage and polyadenylation specificity factor 100 kDa subunit) (CPSF 100 kDa subunit)	CPSF2	LIVER	REGULATED	down	-1.72226	-3.16711	-2.28609	-3.15704	-3.5417	-2.92123	-3.71833	-6.50753	-2.67032	-4.28897	-3.71887	-5.20899
P17095	High mobility group protein HMG-I/HMG-Y (HMG-I(Y)) (High mobility group AT-hook protein 1) (High mobility group protein A1)	HMGA1	LIVER	REGULATED	down	1.39474	1.44291	1.2108	0.614282	0.576444	0.582886	1.37724	1.2502	1.51861	-0.494389	-0.348783	-0.651719
O08705	Sodium/bile acid cotransporter (Na(+)/bile acid cotransporter) (Na(+)/taurocholate transport protein) (Sodium/taurocholate cotransporting polypeptide) (Solute carrier family 10 member 1)	SLC10A1	LIVER	REGULATED	up	-1.56608	-1.58552	-1.71827	-1.06445	-1.18474	-1.02148	2.29337	2.27215	2.3159	3.49281	3.53157	3.45407
P40237	CD82 antigen (C33 antigen) (IA4) (Inducible membrane protein R2) (Metastasis suppressor Kangai-1 homolog) (CD antigen CD82)	CD82	LIVER	REGULATED	up	-4.26868	-2.97787	-3.08246	-2.55558	-2.74257	-2.45799	1.16128	1.22081	1.07931	1.98333	1.94713	2.01769
Q8CJF7	Protein ELYS (Embryonic large molecule derived from yolk sac) (Protein MEL-28) (Putative AT-hook-containing transcription factor 1)	AHCTF1	LIVER	REGULATED	down	-2.93057	-3.16967	-2.23927	-2.16524	-2.23595	-2.16601	-1.52049	-1.45681	-1.60821	-4.54653	-4.38344	-4.72512
Q8K190	SAYSvFN domain-containing protein 1	SAYSD1	LIVER	REGULATED	up	-4.86028	-4.26825	-4.99866	-2.52034	-2.63464	-2.48251	-1.1963	-1.11797	-1.30462	0.32039	0.347382	0.293636
O70439	Syntaxin-7	STX7	LIVER	REGULATED	up	-6.39781	-4.39622	-3.40695	-2.77586	-2.84297	-2.77992	-0.557602	-0.322916	-0.92264	0.676688	0.745458	0.606482
Q91XC9	Peroxisomal membrane protein PEX16 (Peroxin-16) (Peroxisomal biogenesis factor 16)	PEX16	LIVER	REGULATED	up	-5.46485	-3.97705	-3.7793	-3.15602	-3.3448	-3.05702	-1.2678	-1.27443	-1.26316	0.915204	0.971287	0.858466
P70158	Acid sphingomyelinase-like phosphodiesterase 3a (ASM-like phosphodiesterase 3a) (EC 3.1.4.-)	SMPDL3A	LIVER	REGULATED	down	-1.85793	-1.52258	-1.64439	-4.01828	-3.96883	-4.13801	-5.06171	-4.75755	-5.56844	-3.40682	-3.39304	-3.42036
B8JK39	Integrin alpha-9	ITGA9	LIVER	REGULATED	up	-8.42919	-5.283	-6.28033	-4.87129	-4.88066	-4.93032	-2.5997	-2.6759	-2.51313	-1.34145	-1.32145	-1.36118
Q9D0R8	Protein LSM12 homolog	LSM12	LIVER	REGULATED	down	-1.41973	-1.75036	-1.7308	-2.19166	-2.29428	-2.16396	-3.9618	-3.76592	-4.25599	-3.28282	-3.15725	-3.41647
Q8R0T6	Adhesion G protein-coupled receptor G3 (G-protein coupled receptor 97)	ADGRG3	LIVER	REGULATED	up	-4.26398	-4.97772	-4.83544	-4.15993	-4.41494	-4.01109	-1.54942	-1.54372	-1.56025	0.132989	0.248392	0.0110938
Q8K4F6	Probable 28S rRNA (cytosine-C(5))-methyltransferase (EC 2.1.1.-) (NOL1/NOP2/Sun domain family member 5) (Williams-Beuren syndrome chromosomal region 20A protein homolog)	NSUN5	LIVER	REGULATED	down	-2.3322	-2.7101	-2.82689	-2.46111	-2.44657	-2.54421	-3.27321	-9.12271	-2.11812	-4.13625	-4.99501	-3.61378
Q9QZW0	Phospholipid-transporting ATPase 11C (EC 3.6.3.1) (ATPase class VI type 11C) (P4-ATPase flippase complex alpha subunit ATP11C)	ATP11C	LIVER	REGULATED	up	-1.16701	-0.82872	-1.42678	-0.444288	-0.301388	-0.671777	1.89577	1.89374	1.89466	3.56653	3.56293	3.57003
Q61103	Zinc finger protein ubi-d4 (Apoptosis response zinc finger protein) (BRG1-associated factor 45D) (BAF45D) (D4, zinc and double PHD fingers family 2) (Protein requiem)	DPF2	LIVER	REGULATED	down	-2.37062	-2.82919	-2.17959	-0.861686	-0.864108	-0.927635	-0.726763	-0.555002	-0.979533	-3.98269	-4.66056	-3.53405
Q9D8B6	Protein FAM210B	FAM210B	LIVER	REGULATED	up	-8.80379	-5.41339	-5.60377	-5.17572	-5.26627	-5.15864	-2.13524	-2.28122	-1.97446	-1.58223	-1.55821	-1.60598
A6H611	Mitochondrial intermediate peptidase (MIP) (EC 3.4.24.59)	MIPEP	LIVER	REGULATED	down	-0.528201	-1.27043	-0.275433	-3.68722	-4.2889	-3.3312	-4.86667	-5.58883	-4.29114	-2.23941	-2.07646	-2.41784
Q8K003	Translation machinery-associated protein 7 (Coiled-coil domain-containing protein 72)	TMA7	LIVER	REGULATED	down	-3.84677	-3.91793	-3.66145	-5.01494	-5.23938	-4.88861	-5.16425	-5.32946	-4.98428	-5.25935	-5.15758	-5.36576
Q8R0F6	Integrin-linked kinase-associated serine/threonine phosphatase 2C (ILKAP) (EC 3.1.3.16)	ILKAP	LIVER	REGULATED	down	-2.65987	-1.69159	-1.72479	-1.84279	-1.82511	-1.92912	-2.71328	-2.75126	-2.67066	-3.55781	-3.48437	-3.63303
Q9QXK7	Cleavage and polyadenylation specificity factor subunit 3 (EC 3.1.27.-) (Cleavage and polyadenylation specificity factor 73 kDa subunit) (CPSF 73 kDa subunit) (mRNA 3'-end-processing endonuclease CPSF-73)	CPSF3	LIVER	REGULATED	down	-1.82915	-1.77673	-1.87888	-1.80945	-1.86695	-1.82237	-2.95245	-2.55496	-3.68802	-3.26032	-3.39793	-3.13797
P14246	Solute carrier family 2, facilitated glucose transporter member 2 (Glucose transporter type 2, liver) (GLUT-2)	SLC2A2	LIVER	REGULATED	up	-2.03125	-1.82164	-2.02406	-1.97002	-1.89207	-2.12104	0.910077	0.8355	0.994837	2.63306	2.67072	2.59546
P09925	Surfeit locus protein 1	SURF1	LIVER	REGULATED	up	-2.29693	-2.36278	-3.31105	-1.61085	-1.43229	-1.88369	0.428574	0.366335	0.499384	1.87804	1.8949	1.86145
Q7JJ13	Bromodomain-containing protein 2 (Female sterile homeotic-related protein 1) (Fsrg-1) (Protein RING3)	BRD2	LIVER	REGULATED	down	-1.90122	-2.14127	-2.4179	-1.06683	-0.776671	-1.5	-1.75782	-1.40491	-2.37771	-3.53175	-3.11357	-4.10333
O54782	Epididymis-specific alpha-mannosidase (EC 3.2.1.24) (Mannosidase alpha class 2B member 2)	MAN2B2	LIVER	REGULATED	down	-0.388936	-0.402729	-0.368524	-2.75572	-2.84273	-2.74179	-1.89623	-1.90358	-1.8907	-1.73507	-1.78729	-1.68602
Q8VE38	Oxidoreductase NAD-binding domain-containing protein 1 (EC 1.-.-.-)	OXNAD1	LIVER	REGULATED	down	-1.90608	-1.8494	-2.21759	-4.58421	-4.2882	-5.02667	-6.26981	-5.42405		-3.35474	-3.00067	-3.81
O08579	Emerin	EMD	LIVER	REGULATED	up	-5.66087	-4.26156	-4.16628	-3.57553	-3.47986	-3.74668	-2.4821	-2.52092	-2.43848	-0.0828189	-0.0918695	-0.0740678
Q925N0	Sideroflexin-5	SFXN5	LIVER	REGULATED	up	-3.68236	-4.99554	-3.05529	-3.12221	-3.20918	-3.10832	-1.53097	-1.25664	-1.9743	0.634634	0.635021	0.634258
P34884	Macrophage migration inhibitory factor (MIF) (EC 5.3.2.1) (Delayed early response protein 6) (DER6) (Glycosylation-inhibiting factor) (GIF) (L-dopachrome isomerase) (L-dopachrome tautomerase) (EC 5.3.3.12) (Phenylpyruvate tautomerase)	MIF	LIVER	REGULATED	down	4.47774	4.51581	4.455	2.6614	2.70015	2.55308	1.868	1.87708	1.8529	3.18374	3.21387	3.15381
Q9CR13	Protein FMC1 homolog (Formation of mitochondrial complex V assembly factor 1)	FMC1	LIVER	REGULATED	down	-1.0958	-1.01152	-0.873324	-3.66285	-3.35794	-4.11963	-3.78339	-3.50549	-4.23411	-2.25515	-2.26001	-2.25045
Q52KI8	Serine/arginine repetitive matrix protein 1 (Plenty-of-prolines 101)	SRRM1	LIVER	REGULATED	down	0.840116	0.965456	1.10324	0.510503	0.614769	0.329396	-0.352838	-0.00110295	-0.969841	-0.288071	-0.319756	-0.257898
Q78IK4	MICOS complex subunit Mic27 (Apolipoprotein O-like) (Protein FAM121A)	APOOL	LIVER	REGULATED	up	-2.67223	-2.93409	-3.02879	-1.51364	-1.53912	-1.5569	0.411659	0.428424	0.386704	1.48527	1.49466	1.47608
Q9D0K1	Peroxisomal membrane protein PEX13 (Peroxin-13)	PEX13	LIVER	REGULATED	up	-1.66182	-1.18264	-1.47589	-0.761747	-0.695295	-0.899991	0.637793	0.722267	0.520673	2.99579	3.04196	2.9494
Q6P4S8	Integrator complex subunit 1 (Int1)	INTS1	LIVER	REGULATED	down	-1.32522	-1.79488	-1.03272	-2.34365	-2.43055	-2.32983	-2.05636	-2.19591	-1.90212	-2.68136	-2.54358	-2.82935
P31649	Sodium- and chloride-dependent GABA transporter 2 (GAT-2) (Sodium- and chloride-dependent GABA transporter 3) (GAT-3) (Solute carrier family 6 member 13)	SLC6A13	LIVER	REGULATED	up	-3.21169	-2.31442	-1.07971	-1.31296	-1.45824	-1.24899	0.769593	0.866147	0.634913	2.36775	2.37162	2.36398
Q04519	Sphingomyelin phosphodiesterase (EC 3.1.4.12) (Acid sphingomyelinase) (ASMase)	SMPD1	LIVER	REGULATED	down	-0.785377	-1.01263	-0.99911	-2.85457	-2.7563	-3.02872	-3.33289	-3.17699	-3.55942	-2.1836	-2.11321	-2.25555
P43142	G-protein coupled receptor 182 (G10D) (NOW)	GPR182	LIVER	REGULATED	up	-5.31979	-3.78111	-5.19096	-4.37221	-4.22772	-4.60167	-2.05782	-2.14419	-1.95996	-0.276522	-0.207039	-0.347493
Q9D883	Splicing factor U2AF 35 kDa subunit (U2 auxiliary factor 35 kDa subunit) (U2 snRNP auxiliary factor small subunit)	U2AF1	LIVER	REGULATED	down	0.866371	0.744381	0.638651	-0.047862	0.0365792	-0.206198	0.000527513	-0.105538	0.11977	-0.487488	-0.444683	-0.530387
Q01237	3-hydroxy-3-methylglutaryl-coenzyme A reductase (HMG-CoA reductase) (EC 1.1.1.34)	HMGCR	LIVER	REGULATED	up	-3.60346	-3.96238	-4.24385	-2.24925	-2.24625	-2.32063	-3.00859	-3.46782	-2.58787	0.378346	0.52287	0.222313
P17665	Cytochrome c oxidase subunit 7C, mitochondrial (Cytochrome c oxidase polypeptide VIIc)	COX7C	LIVER	REGULATED	up	-3.86883	-3.92661	-6.86551	-3.71947	-3.55542	-3.97355	-1.5232	-2.15653	-0.995083	-0.439266	-0.441341	-0.437251
Q8VEK0	Cell cycle control protein 50A (P4-ATPase flippase complex beta subunit TMEM30A) (Transmembrane protein 30A)	TMEM30A	LIVER	REGULATED	up	-3.20136	-2.23047	-3.00618	-1.94854	-1.93624	-2.02935	0.189705	0.143563	0.241927	1.55943	1.57236	1.54674
Q61153	Type I iodothyronine deiodinase (EC 1.21.99.4) (5DI) (DIOI) (Type 1 DI) (Type-I 5'-deiodinase)	DIO1	LIVER	REGULATED	up	-4.09025	-3.11719	-3.79246	-1.61555	-1.63011	-1.66946	-0.336512	-0.183661	-0.558074	0.699673	0.821077	0.570864
Q8BTY8	Sec1 family domain-containing protein 2 (Neuronal Sec1) (Syntaxin-binding protein 1-like 1)	SCFD2	LIVER	REGULATED	up	-4.05056	-2.84922	-5.33673	-2.73012	-2.55959	-2.99253	-1.32351	-1.5272	-1.10662	0.31422	0.312417	0.315971
P35821	Tyrosine-protein phosphatase non-receptor type 1 (EC 3.1.3.48) (Protein-tyrosine phosphatase 1B) (PTP-1B) (Protein-tyrosine phosphatase HA2) (PTP-HA2)	PTPN1	LIVER	REGULATED	up	-3.50253	-3.93633	-4.32387	-3.05555	-2.98495	-3.19839	-0.969074	-0.958592	-0.985977	0.323773	0.349517	0.298279
Q9CQJ8	NADH dehydrogenase [ubiquinone] 1 beta subcomplex subunit 9 (Complex I-B22) (CI-B22) (NADH-ubiquinone oxidoreductase B22 subunit)	NDUFB9	LIVER	REGULATED	up	-0.805248	-0.464937	-0.987458	0.409246	0.580833	0.145478	1.90412	2.3044	1.16087	3.49821	3.51682	3.47986
Q8K0Z7	Translational activator of cytochrome c oxidase 1 (Coiled-coil domain-containing protein 44) (Translational activator of mitochondrially-encoded cytochrome c oxidase 1)	TACO1	LIVER	REGULATED	down	-0.0625426	0.178235	0.187827	-8.60972	-8.98727	-8.37835	-5.53711	-5.41952	-5.70325	-1.07891	-0.861826	-1.32699
Q9WTQ8	Mitochondrial import inner membrane translocase subunit Tim23	TIMM23	LIVER	REGULATED	up	-1.75739	-2.04789	-1.87002	-1.01244	-0.938769	-1.15868	0.760624	0.829962	0.665008	2.2723	2.15721	2.3761
Q9EPB5	Serine hydrolase-like protein (SHL) (EC 3.1.-.-)	SERHL	LIVER	REGULATED	down	-1.4969	-1.49845	-1.71684	-4.07871	-3.93631	-4.30558	-4.55151	-4.67993	-4.40873	-2.69324	-2.42969	-3.00618
O35226	26S proteasome non-ATPase regulatory subunit 4 (26S proteasome regulatory subunit RPN10) (26S proteasome regulatory subunit S5A) (Multiubiquitin chain-binding protein)	PSMD4	LIVER	REGULATED	down	-1.34934	-0.577236	-0.671591	-2.08216	-2.31148	-1.95218	-1.69098	-1.51021	-1.95902	-2.02687	-1.88985	-2.17396
Q99J94	Solute carrier organic anion transporter family member 1A6 (Kidney-specific organic anion-transporting polypeptide 5) (OATP-5) (Solute carrier family 21 member 13)	SLCO1A6	LIVER	REGULATED	up	-4.32921	-3.9852	-5.43857	-5.79037	-8.04764	-5.01626	-2.05714	-2.0977	-2.01146	-0.357708	-0.374873	-0.341202
Q69ZA1	Cyclin-dependent kinase 13 (EC 2.7.11.22) (EC 2.7.11.23) (CDC2-related protein kinase 5) (Cell division cycle 2-like protein kinase 5) (Cell division protein kinase 13)	CDK13	LIVER	REGULATED	down	-2.72647	-3.66336	-2.92885	-3.62978	-3.85709	-3.5013	-6.06269	-7.89162	-5.13935	-4.30352	-4.52196	-4.11868
Q9WTK3	Glycosylphosphatidylinositol anchor attachment 1 protein (GPI anchor attachment protein 1) (GAA1 protein homolog) (mGAA1)	GPAA1	LIVER	REGULATED	up	-8.2277	-1.99377	-1.7382	-2.10417	-2.17655	-2.10343	-0.636243	-0.721333	-0.539794	1.16612	1.18054	1.15195
Q9D2R6	Cytochrome c oxidase assembly factor 3 homolog, mitochondrial (Coiled-coil domain-containing protein 56)	COA3	LIVER	REGULATED	up	-2.20186	-1.86838	-1.89201	-1.34494	-1.21453	-1.55714	0.920699	0.908284	0.932477	2.09706	2.14878	2.0449
Q91WM6	Protein eva-1 homolog A (Protein FAM176A) (Transmembrane protein 166)	EVA1A	LIVER	REGULATED	up	-1.40758	-1.70427	-1.30671	-1.19091	-1.21843	-1.2322	1.71704	1.72784	1.69974	2.62572	2.68095	2.56987
Q61129	Complement factor I (EC 3.4.21.45) (C3B/C4B inactivator) [Cleaved into: Complement factor I heavy chain; Complement factor I light chain]	CFI	LIVER	REGULATED	down	0.779863	0.540742	0.558009	-1.07715	-1.01031	-1.21583	-0.432898	-0.705232	-0.154663	-0.482798	-0.344529	-0.631371
P06802	Ectonucleotide pyrophosphatase/phosphodiesterase family member 1 (E-NPP 1) (Lymphocyte antigen 41) (Ly-41) (Phosphodiesterase I/nucleotide pyrophosphatase 1) (Plasma-cell membrane glycoprotein PC-1) [Includes: Alkaline phosphodiesterase I (EC 3.1.4.1); Nucleotide pyrophosphatase (NPPase) (EC 3.6.1.9) (Nucleotide diphosphatase)]	ENPP1	LIVER	REGULATED	up	-0.852125	-1.37989	-1.8117	-1.52411	-1.28316	-1.88285	0.863898	0.599338	1.13546	2.81948	2.79065	2.84698
P50429	Arylsulfatase B (ASB) (EC 3.1.6.12) (N-acetylgalactosamine-4-sulfatase) (G4S)	ARSB	LIVER	REGULATED	down	1.09093	1.02044	0.98789	-1.01629	-0.964977	-1.13802	-1.70647	-1.58889	-1.87259	-0.0515959	-0.0500843	-0.0530681
Q91XF0	Pyridoxine-5'-phosphate oxidase (EC 1.4.3.5) (Pyridoxamine-phosphate oxidase)	PNPO	LIVER	REGULATED	down	1.56431	-0.496233	-0.00875478	-2.6841	-2.80836	-2.63776	-0.769565	-2.33001	0.097909	-0.951962	-1.0373	-0.87352
Q9WVB0	RNA-binding protein with multiple splicing (RBP-MS) (Heart and RRM expressed sequence) (Hermes)	RBPMS	LIVER	REGULATED	down	1.23725	0.256131	0.795627	-0.83385	-0.729838	-1.01466	-1.02691	-1.09898	-0.944963	-0.39688	-0.628178	-0.202646
Q9CQS2	H/ACA ribonucleoprotein complex subunit 3 (Nucleolar protein 10) (Nucleolar protein family A member 3) (snoRNP protein NOP10)	NOP10	LIVER	REGULATED	down	0.832159	0.632737	0.565257	-0.170452	-0.190016	-0.219468	1.26152	1.20113	1.33021	-0.395674	-0.316423	-0.477195
Q3KNM2	E3 ubiquitin-protein ligase MARCH5 (EC 2.3.2.27) (Membrane-associated RING finger protein 5) (Membrane-associated RING-CH protein V) (MARCH-V) (RING-type E3 ubiquitin transferase MARCH5)	MARCH5	LIVER	REGULATED	up	-2.65562	-2.64821	-3.38695	-2.89304	-2.81498	-3.04419	-0.608964	-0.669325	-0.540298	1.2292	1.27431	1.18391
O35435	Dihydroorotate dehydrogenase (quinone), mitochondrial (DHOdehase) (EC 1.3.5.2) (Dihydroorotate oxidase)	DHODH	LIVER	REGULATED	up	-3.29842	-3.42532	-4.21107	-3.78261	-3.49298	-4.21495	-0.896067	-0.944048	-0.841698	0.461465	0.422508	0.498383
Q9JLF6	Protein-glutamine gamma-glutamyltransferase K (EC 2.3.2.13) (Epidermal TGase) (Transglutaminase K) (TG(K)) (TGK) (TGase K) (Transglutaminase-1) (TGase-1)	TGM1	LIVER	REGULATED	up	-2.73487	-3.14892	-2.5888	-2.00462	-1.94913	-2.13089	0.205107	0.317045	0.0475317	1.2181	1.25828	1.1779
Q9CZS1	Aldehyde dehydrogenase X, mitochondrial (EC 1.2.1.3) (Aldehyde dehydrogenase family 1 member B1)	ALDH1B1	LIVER	REGULATED	down	4.87571	4.91497	5.00902	2.63673	2.55467	2.64622	2.43686	2.44857	2.41839	3.89758	3.91424	3.88118
Q925F2	Endothelial cell-selective adhesion molecule	ESAM	LIVER	REGULATED	up	-2.53644	-4.26964	-6.11397	-2.92395	-2.24265	-4.33365	-1.06747	-1.99949	-0.395817	-0.142537	0.138042	-0.480537
Q9JJW0	Peroxisomal membrane protein 4 (24 kDa peroxisomal intrinsic membrane protein)	PXMP4	LIVER	REGULATED	up	-0.447769	-0.462399	-0.399825	0.0650445	0.0545337	0.00713571	1.34485	1.32306	1.36807	3.53099	3.53776	3.52437
O70131	Ninjurin-1 (Nerve injury-induced protein 1)	NINJ1	LIVER	REGULATED	up	-3.93716	-4.48256	-4.88299	-4.08546	-4.2061	-4.04219	-1.61027	-2.2169	-1.0973	-0.396832	-0.42592	-0.369084
Q61009	Scavenger receptor class B member 1 (SRB1) (SR-BI)	SCARB1	LIVER	REGULATED	up	-2.15103	-2.01649	-2.08426	-1.47406	-1.39306	-1.62853	0.749582	0.743934	0.752989	1.87201	1.88963	1.85466
Q9WUH1	Transmembrane protein 115 (Protein PL6 homolog)	TMEM115	LIVER	REGULATED	up	-3.0527	-3.36259	-2.61904	-1.18034	-1.10451	-1.32899	0.525862	0.640321	0.364476	0.956176	0.946737	0.965301
Q5SW19	Clustered mitochondria protein homolog	CLUH	LIVER	REGULATED	down	-1.3279	-1.06305	-1.07524	-2.30008	-2.15434	-2.5311	-2.29165	-2.19008	-2.43372	-2.16522	-2.07111	-2.26308
Q9CYV5	Transmembrane protein 135 (Peroxisomal membrane protein 52) (PMP52)	TMEM135	LIVER	REGULATED	up	-1.25066	-1.2973	-1.39911	-1.28897	-1.20035	-1.45205	0.363368	0.438315	0.259846	2.63396	2.67218	2.59578
Q9CQ80	Vacuolar protein-sorting-associated protein 25 (ESCRT-II complex subunit VPS25)	VPS25	LIVER	REGULATED	down	-1.64388	-2.06666	-1.38684	-3.07269	-3.32778	-2.92379	-4.83034	-5.63287	-4.21557	-2.75003	-2.74607	-2.7539
Q9Z211	Peroxisomal membrane protein 11A (Peroxin-11A) (Peroxisomal biogenesis factor 11A) (Protein PEX11 homolog alpha) (PEX11-alpha)	PEX11A	LIVER	REGULATED	up	0.157248	0.241312	0.374148	0.282635	0.253647	0.242759	1.60014	1.58119	1.61992	4.1825	4.19639	4.16886
Q9CQQ8	U6 snRNA-associated Sm-like protein LSm7	LSM7	LIVER	REGULATED	down	1.34451	0.0504329	0.13886	-0.605444	-0.622187	-0.657218	-0.00063465	-3.00962	1.06511	-0.588537	-0.509537	-0.669783
Q64133	Amine oxidase [flavin-containing] A (EC 1.4.3.4) (Monoamine oxidase type A) (MAO-A)	MAOA	LIVER	REGULATED	up	-2.95027	-3.0514	-3.2116	-2.71541	-2.66126	-2.84021	-0.841126	-0.966096	-0.701922	0.861911	0.877234	0.846846
Q6P6M5	Peroxisomal membrane protein 11C (Peroxin-11C) (Peroxisomal biogenesis factor 11C) (Protein PEX11 homolog gamma) (PEX11-gamma)	PEX11G	LIVER	REGULATED	up	-2.41181	-3.3192	-3.28844	-2.92476	-3.07173	-2.85939	-0.652897	-0.787361	-0.503868	0.892216	0.912284	0.87242
Q9CRB9	MICOS complex subunit Mic19 (Coiled-coil-helix-coiled-coil-helix domain-containing protein 3)	CHCHD3	LIVER	REGULATED	up	-1.96679	-1.4804	-1.44163	-0.160919	-0.206904	-0.184601	1.77442	1.7657	1.78163	2.30671	2.38303	2.22837
Q05816	Fatty acid-binding protein, epidermal (Epidermal-type fatty acid-binding protein) (E-FABP) (Fatty acid-binding protein 5) (Keratinocyte lipid-binding protein) (Psoriasis-associated fatty acid-binding protein homolog) (PA-FABP)	FABP5	LIVER	REGULATED	down	0.988135	1.00654	0.97757	0.27721	0.295254	0.190509	0.656498	0.743761	0.535357	0.0474639	0.0551465	0.0399501
Q8BFQ4	WD repeat-containing protein 82	WDR82	LIVER	REGULATED	down	0.281752	0.144446	0.077175	-1.1018	-1.24343	-1.04084	-1.0983	-1.31439	-0.86991	-0.799973	-0.490544	-1.18217
Q9EPS3	D-glucuronyl C5-epimerase (EC 5.1.3.17) (Heparan sulfate C5-epimerase) (Hsepi) (Heparin sulfate C5-epimerase) (Heparin/heparan sulfate:glucuronic acid C5-epimerase) (Heparosan-N-sulfate-glucuronate 5-epimerase)	GLCE	LIVER	REGULATED	up	-6.62313	-5.57112	-6.66157	-4.58906	-5.47772	-4.11026	-3.02065	-3.18579	-2.84074	-2.26133	-2.54195	-2.03239
O88441	Metaxin-2 (Mitochondrial outer membrane import complex protein 2)	MTX2	LIVER	REGULATED	up	-1.9792	-2.268	-1.89444	-1.4232	-1.35984	-1.55804	0.579749	0.127895	0.995425	1.85572	1.90291	1.80827
Q9D7P6	Iron-sulfur cluster assembly enzyme ISCU, mitochondrial (NifU-like N-terminal domain-containing protein) (NifU-like protein)	ISCU	LIVER	REGULATED	down	-0.00385043	-0.0951017	-0.189094	-2.19476	-2.12688	-2.33458	-1.55293	-1.52553	-1.59171	-1.03813	-0.907364	-1.17785
Q8VHN7	G-protein coupled receptor 98 (Monogenic audiogenic seizure susceptibility protein 1) (Neurepin) (Very large G-protein coupled receptor 1)	GPR98	LIVER	REGULATED	down	0.209301	0.467949	0.395293	-2.90706	-2.81341	-3.07589	0.365173	0.441208	0.260111	-0.571612	-0.498635	-0.64634
Q91WK2	Eukaryotic translation initiation factor 3 subunit H (eIF3h) (Eukaryotic translation initiation factor 3 subunit 3) (eIF-3-gamma) (eIF3 p40 subunit)	EIF3H	LIVER	REGULATED	down	-2.19692	-2.95146	-1.50265	-2.80397	-3.50163	-2.40293	-7.12021	-6.27445		-3.26809	-2.95444	-3.65695
B1AZI6	THO complex subunit 2 (Tho2)	THOC2	LIVER	REGULATED	down	-2.11176	-2.4262	-1.69372	-2.48066	-2.74736	-2.32342	-3.07414	-3.23131	-2.90213	-3.04436	-3.35518	-2.79514
Q9ER88	28S ribosomal protein S29, mitochondrial (MRP-S29) (S29mt) (Death-associated protein 3) (DAP-3)	DAP3	LIVER	REGULATED	down	-0.685527	-0.557807	-0.46035	-2.59664	-2.51829	-2.7481	-2.63614	-2.80853	-2.44915	-1.49526	-1.51786	-1.47361
Q6GSS7	Histone H2A type 2-A (H2a-614) (H2a-615) (Histone H2A.2)	HIST2H2AA1; HIST2H2AA2	LIVER	REGULATED	down	1.05356	1.11092	1.72737	-3.17453	-3.81975	-2.79754	-0.450829	-0.780113	-0.125664	0.334854	0.411889	0.255739
Q80UG1	Fatty acid desaturase 6 (EC 1.14.19.-)	FADS6	LIVER	REGULATED	up	-3.14888	-2.9297	-3.56081	-3.05217	-2.86594	-3.3351	-0.743668	-0.60626	-0.940531	0.687904	0.77047	0.602769
Q6DIC0	Probable global transcription activator SNF2L2 (EC 3.6.4.-) (ATP-dependent helicase SMARCA2) (BRG1-associated factor 190B) (BAF190B) (Protein brahma homolog) (SNF2-alpha) (SWI/SNF-related matrix-associated actin-dependent regulator of chromatin subfamily A member 2)	SMARCA2	LIVER	REGULATED	down	-1.03183	-0.916029	-1.09133	-0.612363	-0.552218	-0.743686	-1.17254	-1.38348	-0.948906	-1.90877	-1.99949	-1.82567
Q8JZX4	Splicing factor 45 (45 kDa-splicing factor) (RNA-binding motif protein 17)	RBM17	LIVER	REGULATED	down	-1.44207	-1.61245	-1.89343	-1.78453	-1.79245	-1.845	-1.98852	-2.01978	-1.9539	-2.55727	-2.55309	-2.56135
P51125	Calpastatin (Calpain inhibitor)	CAST	LIVER	REGULATED	down	-0.625296	-0.501871	-0.429553	-0.57421	-0.536393	-0.681534	-1.63484	-1.49278	-1.83907	-1.43188	-1.45204	-1.41252
Q9D0B5	Thiosulfate sulfurtransferase/rhodanese-like domain-containing protein 3 (Rhodanese domain-containing protein 3)	TSTD3	LIVER	REGULATED	down	-0.903816	-1.27624	-1.22106	-3.7213	-3.77521	-3.73756	-3.52257	-4.05063	-3.05687	-2.0393	-1.99065	-2.08826
P21278	Guanine nucleotide-binding protein subunit alpha-11 (G alpha-11) (G-protein subunit alpha-11)	GNA11	LIVER	REGULATED	up	-2.97879	-2.70864	-2.5225	-2.22899	-2.17724	-2.35119	-0.105464	-0.0431141	-0.191335	1.07281	1.09843	1.04744
O35900	U6 snRNA-associated Sm-like protein LSm2 (Protein G7b) (snRNP core Sm-like protein Sm-x5)	LSM2	LIVER	REGULATED	down	-0.132135	0.139238	0.616265	0.298898	0.218958	0.306481	-0.0443987	0.105689	-0.261491	-0.72903	-0.630842	-0.831431
Q91X44	Glucokinase regulatory protein (Glucokinase regulator)	GCKR	LIVER	REGULATED	down	-1.03353	-0.991943	-1.29335	-2.01839	-1.88561	-2.23347	-3.8849		-2.71582	-1.98189	-1.95202	-2.01154
Q7TPD0	Integrator complex subunit 3 (Int3) (SOSS complex subunit A) (Sensor of single-strand DNA complex subunit A) (SOSS-A) (Sensor of ssDNA subunit A)	INTS3	LIVER	REGULATED	down	1.05884	-0.145534	0.760245	-0.578231	-0.63077	-0.595767	-0.327004	-1.00344	0.224679	-0.423577	-0.406786	-0.440102
P14094	Sodium/potassium-transporting ATPase subunit beta-1 (Sodium/potassium-dependent ATPase subunit beta-1)	ATP1B1	LIVER	REGULATED	up	-0.102741	-0.465309	0.0751022	-0.405907	-0.340025	-0.543522	1.87307	1.8569	1.88944	3.65133	3.67966	3.62322
Q9CW46	Ribonucleoprotein PTB-binding 1 (Protein raver-1)	RAVER1	LIVER	REGULATED	down	-2.45291	-2.26456	-1.81441	-1.4031	-1.35868	-1.51745	-2.43665	-2.06032	-3.1157	-3.10882	-3.11679	-3.1011
P62307	Small nuclear ribonucleoprotein F (snRNP-F) (Sm protein F) (Sm-F) (SmF)	SNRPF	LIVER	REGULATED	down	-1.25632	-1.34598	-1.75231	-1.40649	-1.56041	-1.33541	-0.222396	-0.213744	-0.23697	-2.31612	-2.37075	-2.26489
P42925	Peroxisomal membrane protein 2 (22 kDa peroxisomal membrane protein)	PXMP2	LIVER	REGULATED	up	1.24185	0.831001	0.940634	1.56004	1.52936	1.5218	2.16674	1.95828	2.38807	4.75914	4.77902	4.73954
Q9EPU4	Cleavage and polyadenylation specificity factor subunit 1 (Cleavage and polyadenylation specificity factor 160 kDa subunit) (CPSF 160 kDa subunit)	CPSF1	LIVER	REGULATED	down	-4.35791	-4.52746	-4.65602	-4.37089	-4.52215	-4.302	-4.34846	-4.41831	-4.26901	-5.38221	-5.28215	-5.4867
O88829	Lactosylceramide alpha-2,3-sialyltransferase (EC 2.4.99.9) (CMP-NeuAc:lactosylceramide alpha-2,3-sialyltransferase) (Ganglioside GM3 synthase) (ST3Gal V) (ST3GalV) (Sialyltransferase 9)	ST3GAL5	LIVER	REGULATED	up	-2.52077	-4.12258	-3.48962	-2.29973	-2.27332	-2.39508	-0.674291	-0.716095	-0.627156	0.393131	0.468601	0.31571
A2ALW5	DnaJ homolog subfamily C member 25	DNAJC25	LIVER	REGULATED	up	-2.52879	-2.66299	-2.84186	-2.34894	-2.37891	-2.38788	-0.019225	-0.112968	0.0867102	1.09096	1.12302	1.05907
Q61595	Kinectin	KTN1	LIVER	REGULATED	down	1.23317	1.21977	0.996863	-1.04344	-1.04582	-1.10943	-1.26995	-1.52508	-1.00658	0.293118	0.433383	0.142172
Q8BK30	NADH dehydrogenase [ubiquinone] flavoprotein 3, mitochondrial (Complex I-9kD) (CI-9kD) (NADH-ubiquinone oxidoreductase 9 kDa subunit)	NDUFV3	LIVER	REGULATED	up	-4.20953	-4.66599	-4.23759	-3.60794	-3.64403	-3.641	-0.766645	-0.805307	-0.723214	-0.607699	-0.642032	-0.575063
Q9CRD0	OCIA domain-containing protein 1	OCIAD1	LIVER	REGULATED	up	-0.284482	0.130978	0.164562	0.493052	0.587574	0.323222	2.11731	2.11589	2.11544	3.76969	3.80138	3.73818
Q9JJL3	Solute carrier organic anion transporter family member 1B2 (Liver-specific organic anion transporter 1) (LST-1) (SLC21A6) (Solute carrier family 21 member 10)	SLCO1B2	LIVER	REGULATED	up	0.684535	1.03294	0.695621	0.418468	0.424128	0.344395	2.56225	2.36614	2.77202	4.57816	4.60979	4.54671
O08966	Solute carrier family 22 member 1 (Organic cation transporter 1) (mOCT1)	SLC22A1	LIVER	REGULATED	up	-0.584891	-0.797865	-0.823177	-1.2945	-1.28882	-1.3686	1.0299	1.15786	0.847801	3.03065	2.94346	3.11071
Q9CQ01	Ribonuclease T2 (EC 3.1.27.-) (Ribonuclease 6)	RNASET2	LIVER	REGULATED	down	1.02113	1.31053	1.16907	-0.746333	-0.682125	-0.882107	-1.06301	-0.839688	-1.40674	0.315833	0.25606	0.371701
O35454	Chloride transport protein 6 (Chloride channel protein 6) (ClC-6)	CLCN6	LIVER	REGULATED	up	-7.17738	-1.39476	-1.43091	-2.01651	-2.18327	-1.935	-0.292972	-0.301248	-0.286303	1.28921	1.33841	1.23968
Q6ZQ89	E3 ubiquitin-protein ligase MARCH6 (EC 2.3.2.27) (Membrane-associated RING finger protein 6) (Membrane-associated RING-CH protein VI) (MARCH-VI) (RING-type E3 ubiquitin transferase MARCH6)	MARCH6	LIVER	REGULATED	up	-1.52607	-0.972241	-1.19745	-1.18437	-1.1529	-1.28501	0.0128531	0.602328	-1.43726	2.53154	2.53071	2.53235
Q571F8	Glutaminase liver isoform, mitochondrial (GLS) (EC 3.5.1.2) (L-glutaminase) (L-glutamine amidohydrolase)	GLS2	LIVER	REGULATED	down	4.22325	4.30667	4.14636	2.50435	2.59437	2.33967	2.44418	2.38986	2.5059	3.39166	3.38819	3.39503
Q9R0A0	Peroxisomal membrane protein PEX14 (PTS1 receptor-docking protein) (Peroxin-14) (Peroxisomal membrane anchor protein PEX14)	PEX14	LIVER	REGULATED	up	-0.69961	-0.737713	-0.399066	-0.0193681	-0.0924204	-0.0180133	0.874584	0.908454	0.827296	3.1476	3.17411	3.12133
Q569Z5	Probable ATP-dependent RNA helicase DDX46 (EC 3.6.4.13) (DEAD box protein 46)	DDX46	LIVER	REGULATED	down	-0.431354	-0.650039	-0.458554	-0.560879	-0.501848	-0.690986	-1.35405	-1.34585	-1.36804	-1.36263	-1.44757	-1.28453
Q9D6J5	NADH dehydrogenase [ubiquinone] 1 beta subcomplex subunit 8, mitochondrial (Complex I-ASHI) (CI-ASHI) (NADH-ubiquinone oxidoreductase ASHI subunit)	NDUFB8	LIVER	REGULATED	up	-0.191194	-0.535389	-0.617719	0.204028	0.207827	0.131834	2.27735	2.21629	2.34681	3.25346	3.24419	3.26242
Q8CAQ8	MICOS complex subunit Mic60 (Mitochondrial inner membrane protein) (Mitofilin)	IMMT	LIVER	REGULATED	up	-0.874525	-0.544024	-0.799327	0.132661	0.300627	-0.126435	1.76565	1.72865	1.8071	2.98711	3.00438	2.9701
Q9ESZ8	General transcription factor II-I (GTFII-I) (TFII-I) (Bruton tyrosine kinase-associated protein 135) (BAP-135) (BTK-associated protein 135)	GTF2I	LIVER	REGULATED	down	-1.44333	-0.911465	-1.02889	-1.43804	-1.59287	-1.36622	-1.83274	-1.801	-1.87721	-1.94412	-1.96003	-1.92881
Q9ET22	Dipeptidyl peptidase 2 (EC 3.4.14.2) (Dipeptidyl aminopeptidase II) (Dipeptidyl peptidase 7) (Dipeptidyl peptidase II) (DPP II) (Quiescent cell proline dipeptidase)	DPP7	LIVER	REGULATED	down	0.491976	-0.169692	-0.820352	-2.74138	-2.40614	-3.24875	-1.24936	-1.94046	-0.689907	-1.03781	-1.03791	-1.03771
Q9CXJ1	Probable glutamate--tRNA ligase, mitochondrial (EC 6.1.1.17) (Glutamyl-tRNA synthetase) (GluRS)	EARS2	LIVER	REGULATED	down	-6.59555	-2.20511	-2.33361	-4.20374	-4.06902	-4.42119	-6.9607	-6.11494		-4.15046	-4.03845	-4.26846
Q9WUU7	Cathepsin Z (EC 3.4.18.1)	CTSZ	LIVER	REGULATED	down	1.68508	1.62301	1.37343	-0.330473	-0.328433	-0.400897	0.767546	0.615911	0.934016	0.748365	0.803642	0.692473
Q99KG5	Lipolysis-stimulated lipoprotein receptor (Lipolysis-stimulated receptor) (Liver-specific bHLH-Zip transcription factor) (Liver-specific gene on mouse chromosome 7 protein)	LSR	LIVER	REGULATED	up	-3.68679	-3.66281	-3.74245	-3.76626	-3.80886	-3.79314	-0.615886	-0.883619	-0.341593	0.00713218	0.0328832	-0.0183699
Q9WVJ3	Carboxypeptidase Q (EC 3.4.17.-) (Hematopoietic lineage switch 2) (Plasma glutamate carboxypeptidase)	CPQ	LIVER	REGULATED	down	2.99349	3.0737	3.03124	0.911913	0.777446	0.966878	1.48673	1.39756	1.58767	2.22759	2.14228	2.30602
Q62018	RNA polymerase-associated protein CTR9 homolog (SH2 domain-binding protein 1) (Tetratricopeptide repeat-containing, SH2-binding phosphoprotein of 150 kDa) (TPR-containing, SH2-binding phosphoprotein of 150 kDa) (p150TSP)	CTR9	LIVER	REGULATED	down	-6.61878	-2.59376	-3.04418	-1.00797	-1.01035	-1.07396	-2.34833	-2.28009	-2.4424	-4.61215	-5.25132	-4.18111
Q7TNC4	Putative RNA-binding protein Luc7-like 2 (CGI-74 homolog)	LUC7L2	LIVER	REGULATED	down	-2.28038	-2.46827	-2.61536	-3.40383	-3.37339	-3.5034	-4.46295	-4.22968	-4.82531	-3.2597	-3.30287	-3.21889
Q6NSR8	Probable aminopeptidase NPEPL1 (EC 3.4.11.-) (Aminopeptidase-like 1)	NPEPL1	LIVER	REGULATED	down	0.159167	0.215292	0.203613	-0.713318	-0.720993	-0.774035	-1.36903	-1.46037	-1.26572	-0.602584	-0.510256	-0.698462
Q8BGI5	Peroxisome assembly protein 26 (Peroxin-26)	PEX26	LIVER	REGULATED	up	-3.88947	-4.22954	-4.22898	-4.07372	-4.16199	-4.05869	-2.47366	-2.44687	-2.51163	-0.454574	-0.428662	-0.48024
Q8JZQ9	Eukaryotic translation initiation factor 3 subunit B (eIF3b) (Eukaryotic translation initiation factor 3 subunit 9) (eIF-3-eta) (eIF3 p116)	EIF3B	LIVER	REGULATED	down	-0.136109	-0.183563	-0.489035	-0.791238	-0.617393	-1.05793	-1.73671	-2.10497	-1.3813	-1.04571	-1.29919	-0.835621
P01867	Ig gamma-2B chain C region	IGH-3	LIVER	REGULATED	up	-1.7251	-1.79367	-1.48244	0.0254345	0.0320296	-0.0495843	-1.33895	-1.07153	-1.76816	2.01662	2.0354	1.99811
Q8K1B8	Fermitin family homolog 3 (Kindlin-3) (Unc-112-related protein 2)	FERMT3	LIVER	REGULATED	down	-0.95852	-1.10036	-1.22307	-1.26107	-1.19393	-1.40007	-2.58472	-2.69575	-2.46019	-1.88781	-1.80036	-1.97829
P15208	Insulin receptor (IR) (EC 2.7.10.1) (CD antigen CD220) [Cleaved into: Insulin receptor subunit alpha; Insulin receptor subunit beta]	INSR	LIVER	REGULATED	up	-4.24996	-4.41507	-3.95167	-3.49182	-4.14589	-3.11069	-1.43251	-1.61908	-1.23181	-0.534295	-0.498075	-0.570429
P10605	Cathepsin B (EC 3.4.22.1) (Cathepsin B1) [Cleaved into: Cathepsin B light chain; Cathepsin B heavy chain]	CTSB	LIVER	REGULATED	down	3.97094	4.0067	3.87953	1.72269	1.73355	1.64335	2.51451	2.48155	2.55117	3.16687	3.19238	3.1416
Q9WUP4	Polyprenol reductase (EC 1.3.1.94) (3-oxo-5-alpha-steroid 4-dehydrogenase 3) (EC 1.3.1.22) (Steroid 5-alpha-reductase 2-like) (Steroid 5-alpha-reductase 3) (S5AR 3) (SR type 3)	SRD5A3	LIVER	REGULATED	up	-2.02642	-1.64734	-1.62318	-1.81366	-1.67606	-2.03462	0.0541971	-0.0460971	0.167236	1.90283	1.93555	1.87027
Q9CPU2	NADH dehydrogenase [ubiquinone] 1 beta subcomplex subunit 2, mitochondrial (Complex I-AGGG) (CI-AGGG) (NADH-ubiquinone oxidoreductase AGGG subunit)	NDUFB2	LIVER	REGULATED	up	-1.17641	-0.821904	-1.09032	-0.30027	-0.258199	-0.412106	1.42054	1.45586	1.37134	2.65419	2.70323	2.60484
Q64462	Cytochrome P450 4B1 (EC 1.14.14.1) (CYPIVB1)	CYP4B1	LIVER	REGULATED	up	-2.19025	-2.35516	-2.47226	-1.94013	-1.83751	-2.11932	-0.505849	-0.536159	-0.472354	1.29519	1.32888	1.26164
Q3UIU2	NADH dehydrogenase [ubiquinone] 1 beta subcomplex subunit 6 (Complex I-B17) (CI-B17) (NADH-ubiquinone oxidoreductase B17 subunit)	NDUFB6	LIVER	REGULATED	up	1.22916	0.871369	1.10547	1.65548	1.68336	1.55858	3.41383	3.39946	3.42801	4.69687	4.69736	4.6964
Q91XC8	Death-associated protein 1 (DAP-1)	DAP	LIVER	REGULATED	down	0.718652	0.793404	0.586787	-0.617567	-0.588713	-0.71547	-0.839402	-0.986718	-0.677278	-0.0753588	-0.104845	-0.0472387
Q9D6K5	Synaptojanin-2-binding protein (Activin receptor-interacting protein 2) (Activin receptor-interacting protein 4) (Mitochondrial outer membrane protein 25)	SYNJ2BP	LIVER	REGULATED	up	-3.29749	-1.69886	-1.97771	-1.72084	-1.86836	-1.65502	-0.107478	-0.147217	-0.0627767	1.39848	1.46146	1.33444
O35344	Importin subunit alpha-4 (Importin alpha Q2) (Qip2) (Karyopherin subunit alpha-3)	KPNA3	LIVER	REGULATED	down	0.480859	-0.204394	-0.163951	-0.700056	-0.675556	-0.793426	-0.801459	-1.46194	-0.258375	-0.766184	-0.769478	-0.762987
Q3TL44	NLR family member X1	NLRX1	LIVER	REGULATED	up	-4.63985	-3.39137	-4.47305	-4.28161	-4.33036	-4.30269	-2.2764	-2.16143	-2.43856	-0.508694	-0.439792	-0.579043
Q3V384	Lactation elevated protein 1	LACE1	LIVER	REGULATED	down	-1.31817	-1.45513	-1.39391	-3.44309	-3.45766	-3.49699	-4.31119	-3.6152	-6.48427	-2.16678	-2.07937	-2.25723
Q6NVF9	Cleavage and polyadenylation specificity factor subunit 6	CPSF6	LIVER	REGULATED	down	-0.883887	-1.2714	-1.32603	-1.24914	-1.27466	-1.29237	-1.48591	-1.36714	-1.65385	-1.95223	-1.95616	-1.94842
O88967	ATP-dependent zinc metalloprotease YME1L1 (EC 3.4.24.-) (ATP-dependent metalloprotease FtsH1) (YME1-like protein 1)	YME1L1	LIVER	REGULATED	up	-4.25614	-3.08156	-2.18509	-2.91657	-3.16146	-2.77509	-1.44174	-1.21595	-1.79006	0.564011	0.480986	0.640445
Q5SWU9	Acetyl-CoA carboxylase 1 (ACC1) (EC 6.4.1.2) (ACC-alpha) (Acetyl-CoA carboxylase 265) [Includes: Biotin carboxylase (EC 6.3.4.14)]	ACACA	LIVER	REGULATED	down	2.1513	2.20024	2.13812	-0.175668	-0.128091	-0.293387	-0.401693	-0.480199	-0.312542	1.39907	1.40497	1.39331
P70288	Histone deacetylase 2 (HD2) (EC 3.5.1.98) (YY1 transcription factor-binding protein)	HDAC2	LIVER	REGULATED	down	-0.658432	-0.894828	-1.12217	-0.74516	-0.648026	-0.917998	-0.783959	-0.782287	-0.789705	-1.66625	-1.75235	-1.58715
Q9ERF3	WD repeat-containing protein 61 (Meiotic recombination REC14 protein homolog) [Cleaved into: WD repeat-containing protein 61, N-terminally processed]	WDR61	LIVER	REGULATED	down	-0.600785	-1.07009	-1.03551	-1.60498	-1.76815	-1.52636	-2.14787	-2.1236	-2.18255	-1.68851	-1.67179	-1.70497
Q9CQ22	Ragulator complex protein LAMTOR1 (Late endosomal/lysosomal adaptor and MAPK and MTOR activator 1) (Lipid raft adaptor protein p18)	LAMTOR1	LIVER	REGULATED	up	-3.06841	-3.34958	-4.16878	-3.04522	-3.21892	-2.95814	-1.12832	-0.824422	-1.63446	0.120149	0.147323	0.0932102
Q8R1K1	Ubiquitin-associated domain-containing protein 2 (UBA domain-containing protein 2) (Phosphoglycerate dehydrogenase-like protein 1)	UBAC2	LIVER	REGULATED	up	-1.95093	-2.33565	-2.31215	-2.09829	-1.92966	-2.35825	-0.225442	-0.192534	-0.271456	1.40375	1.42414	1.38363
Q8BGB2	Tetratricopeptide repeat protein 7A (TPR repeat protein 7A)	TTC7A	LIVER	REGULATED	down	-2.84976	-7.02375	-7.59293	-11.2375	-12.3367	-10.6878	-4.36907	-6.84738	-3.35176	-7.07624	-6.88307	-7.29281
P13864	DNA (cytosine-5)-methyltransferase 1 (Dnmt1) (Met-1) (EC 2.1.1.37) (DNA methyltransferase MmuI) (DNA MTase MmuI) (M.MmuI) (MCMT)	DNMT1	LIVER	REGULATED	down	-5.12268	-3.92532	-3.86661	-2.78677	-2.78277	-2.85916	-3.87757	-3.14445	-6.44334	-5.07382	-4.8166	-5.37762
Q8VEB4	Group XV phospholipase A2 (EC 2.3.1.-) (1-O-acylceramide synthase) (ACS) (LCAT-like lysophospholipase) (LLPL) (Lysophospholipase 3) (Lysosomal phospholipase A2) (LPLA2)	PLA2G15	LIVER	REGULATED	down	0.0721087	0.187692	-0.219725	-2.44054	-2.21951	-2.77087	-1.90715	-2.02431	-1.77613	-0.737297	-0.717193	-0.757128
Q9Z2A7	Diacylglycerol O-acyltransferase 1 (EC 2.3.1.20) (Acyl-CoA retinol O-fatty-acyltransferase) (ARAT) (Retinol O-fatty-acyltransferase) (EC 2.3.1.76) (Diglyceride acyltransferase)	DGAT1	LIVER	REGULATED	up	-2.24048	-1.39428	-1.43123	-1.27317	-1.32399	-1.2923	0.758138	0.828105	0.661639	1.92529	1.88326	1.96504
O55201	Transcription elongation factor SPT5 (DRB sensitivity-inducing factor large subunit) (DSIF large subunit)	SUPT5H	LIVER	REGULATED	down	-3.85995	-3.77534	-3.70884	-4.3129	-4.50398	-4.21211	-3.81025	-3.77264	-3.86249	-4.54243	-4.52052	-4.56408
Q8VCL2	Protein SCO2 homolog, mitochondrial	SCO2	LIVER	REGULATED	up	-3.45977	-3.6155	-4.69551	-3.54364	-3.53254	-3.62324	-1.23159	-1.23515	-1.23078	-0.239374	-0.186537	-0.292704
P18572	Basigin (Basic immunoglobulin superfamily) (HT7 antigen) (Membrane glycoprotein gp42) (CD antigen CD147)	BSG	LIVER	REGULATED	up	-0.0715142	0.0559328	-0.0703572	0.144491	0.250169	-0.0382633	2.18269	2.15761	2.2099	3.57926	3.62665	3.53161
Q5XKN4	Protein jagunal homolog 1	JAGN1	LIVER	REGULATED	up	-4.28664	-4.41305	-4.85934	-4.23346	-4.41288	-4.14184	-1.60878	-1.6131	-1.60702	-0.931736	-0.953525	-0.910849
Q8K2I4	Beta-mannosidase (EC 3.2.1.25) (Lysosomal beta A mannosidase) (Mannanase) (Mannase)	MANBA	LIVER	REGULATED	down	0.0439566	-0.519338	-0.2135	-2.1929	-2.29341	-2.16705	-0.783338	-1.33336	-0.304007	-1.00542	-0.999051	-1.01165
P23708	Nuclear transcription factor Y subunit alpha (CAAT box DNA-binding protein subunit A) (Nuclear transcription factor Y subunit A) (NF-YA)	NFYA	LIVER	REGULATED	down	-1.45238	-1.51834	-1.03199	-0.875442	-0.962965	-0.861067	-1.25052	-0.967521	-1.71187	-2.1067	-2.26102	-1.97091
Q923D5	WW domain-binding protein 11 (WBP-11) (Splicing factor that interacts with PQBP-1 and PP1)	WBP11	LIVER	REGULATED	down	-0.560912	-0.336479	-0.343749	-0.983345	-0.990838	-1.04424	-1.29314	-1.3362	-1.24452	-1.16643	-1.20347	-1.13128
E9PZM4	Chromodomain-helicase-DNA-binding protein 2 (CHD-2) (EC 3.6.4.12) (ATP-dependent helicase CHD2)	CHD2	LIVER	REGULATED	down	-3.1496	-3.21962	-3.28402	-3.52015	-3.52809	-3.5806	-2.97764	-2.80282	-3.23555	-3.96447	-3.74395	-4.21718
Q91VJ5	Polyglutamine-binding protein 1 (PQBP-1) (38 kDa nuclear protein containing a WW domain) (Npw38) (Polyglutamine tract-binding protein 1)	PQBP1	LIVER	REGULATED	down	-0.0992288	-0.183236	-0.377151	-0.257855	-0.173416	-0.416189	-0.454795	-0.486275	-0.4199	-0.961814	-0.923215	-1.00038
Q9CQU1	Microfibrillar-associated protein 1	MFAP1	LIVER	REGULATED	down	-1.47195	-0.452366	-1.25995	-0.426141	-0.157107	-0.826576	-0.0286782	0.00355049	-0.0737961	-1.80177	-1.8529	-1.7537
Q8QZY2	Glycerate kinase (EC 2.7.1.31)	GLYCTK	LIVER	REGULATED	down	0.676447	0.800257	0.923227	-1.1768	-1.19783	-1.22439	-1.00278	-1.41765	-0.613024	0.0494007	0.0944081	0.0042229
Q9D6M3	Mitochondrial glutamate carrier 1 (GC-1) (Glutamate/H(+) symporter 1) (Solute carrier family 25 member 22)	SLC25A22	LIVER	REGULATED	up	0.962932	1.06475	0.855127	1.20472	1.30986	1.02259	3.25518	3.20967	3.30665	4.54539	4.56959	4.52144
Q9CQW9	Interferon-induced transmembrane protein 3 (Dispanin subfamily A member 2b) (DSPA2b) (Fragilis protein) (Interferon-inducible protein 15) (Mouse ifitm-like protein 1) (Mil-1)	IFITM3	LIVER	REGULATED	up	0.0785035	-0.070606	-0.458802	0.316184	0.241971	0.318593	2.15981	2.10893	2.21755	3.41002	3.48047	3.338
P60060	Protein transport protein Sec61 subunit gamma	SEC61G	LIVER	REGULATED	up	-0.445687	-0.611755	-0.579145	0.0749476	0.0621081	0.0193369	1.86539	1.79202	1.94879	3.02075	2.93573	3.09892
Q9DCM0	Persulfide dioxygenase ETHE1, mitochondrial (EC 1.13.11.18) (Ethylmalonic encephalopathy protein 1 homolog) (Hepatoma subtracted clone one protein) (Sulfur dioxygenase ETHE1)	ETHE1	LIVER	REGULATED	down	3.85256	3.77147	3.57884	1.42535	1.48116	1.29875	1.75128	1.70638	1.80204	3.00566	3.02605	2.98555
Q569Z6	Thyroid hormone receptor-associated protein 3 (Thyroid hormone receptor-associated protein complex 150 kDa component) (Trap150)	THRAP3	LIVER	REGULATED	down	1.48791	1.44565	1.21967	0.646362	0.656646	0.5676	0.326383	0.278014	0.381203	0.666398	0.704904	0.627923
O09044	Synaptosomal-associated protein 23 (SNAP-23) (Syndet) (Vesicle-membrane fusion protein SNAP-23)	SNAP23	LIVER	REGULATED	up	-1.76825	-1.91743	-2.44191	-1.32556	-1.08746	-1.68017	0.645637	0.694918	0.577695	1.49914	1.56129	1.43599
Q8CFQ3	Intron-binding protein aquarius	AQR	LIVER	REGULATED	down	-2.00614	-1.94002	-1.35013	-2.08111	-2.17	-2.06552	-2.24356	-2.52142	-1.96062	-2.52184	-2.54942	-2.49551
Q9JMA1	Ubiquitin carboxyl-terminal hydrolase 14 (EC 3.4.19.12) (Deubiquitinating enzyme 14) (Ubiquitin thioesterase 14) (Ubiquitin-specific-processing protease 14)	USP14	LIVER	REGULATED	down	-0.0882336	-0.0581309	0.204707	-1.17792	-1.19128	-1.23302	-1.31131	-1.23692	-1.41405	-0.715282	-0.796727	-0.640226
Q04736	Tyrosine-protein kinase Yes (EC 2.7.10.2) (Proto-oncogene c-Yes) (p61-Yes)	YES1	LIVER	REGULATED	down	-1.56727	-4.55022	-3.75629	-5.80004	-6.86235	-5.26182	-2.6036	-5.35954	-1.55854	-4.20786	-4.19524	-4.22024
Q9Z0J0	Epididymal secretory protein E1 (mE1) (Niemann Pick type C2 protein homolog)	NPC2	LIVER	REGULATED	down	-0.180568	-0.117813	-0.345083	-2.30771	-2.32755	-2.35645	-1.57706	-1.68605	-1.4547	-0.925952	-0.86798	-0.984681
Q9CQ54	NADH dehydrogenase [ubiquinone] 1 subunit C2 (Complex I-B14.5b) (CI-B14.5b) (NADH-ubiquinone oxidoreductase subunit B14.5b)	NDUFC2	LIVER	REGULATED	up	0.305314	0.203368	0.157131	0.884587	0.929014	0.770239	2.64097	2.63566	2.64395	3.74731	3.77331	3.72156
Q91V12	Cytosolic acyl coenzyme A thioester hydrolase (EC 3.1.2.2) (Acyl-CoA thioesterase 7) (Brain acyl-CoA hydrolase) (BACH) (CTE-IIa) (CTE-II) (Long chain acyl-CoA thioester hydrolase)	ACOT7	LIVER	REGULATED	down	1.1301	1.20056	1.51685	0.748127	0.702406	0.724197	0.0985881	0.20073	-0.0443389	0.549117	0.524026	0.573116
Q8C0K5	Graves disease carrier protein homolog (GDC) (Mitochondrial solute carrier protein homolog) (Solute carrier family 25 member 16)	SLC25A16	LIVER	REGULATED	up	-6.51747	-6.69026	-6.4489	-6.38244	-6.54514	-6.30421	-3.964	-3.98498	-3.94176	-3.03543	-3.01535	-3.05523
Q8CCH2	NHL repeat-containing protein 3	NHLRC3	LIVER	REGULATED	down	0.135191	-0.0920954	-0.195052	-2.2055	-2.23816	-2.24184	-2.56274	-2.85553	-2.26726	-0.760873	-0.70751	-0.814756
Q02013	Aquaporin-1 (AQP-1) (Aquaporin-CHIP) (Delayed early response protein 2) (DER2) (Water channel protein for red blood cells and kidney proximal tubule)	AQP1	LIVER	REGULATED	up	-0.0299905	0.0105263	-0.247301	0.872084	0.967578	0.701136	2.33449	2.29335	2.38084	3.42921	3.43202	3.42646
Q9CRB8	Mitochondrial fission process protein 1 (Mitochondrial 18 kDa protein) (MTP18)	MTFP1	LIVER	REGULATED	up	-1.87302	-1.29774	-2.03263	-1.43541	-1.3953	-1.54516	0.584648	-0.124065	1.15328	1.8126	1.77478	1.84847
Q8BHC7	Rhomboid-related protein 4 (RRP4) (EC 3.4.21.105) (Rhomboid domain-containing protein 1) (mRHBDD1) (Rhomboid-like protein 4)	RHBDD1	LIVER	REGULATED	up	-1.77906	-1.54359	-0.668341	-0.747812	-0.761588	-0.802501	0.337195	0.435542	0.199878	2.22045	2.2387	2.20247
Q3UUI3	Acyl-coenzyme A thioesterase THEM4 (Acyl-CoA thioesterase THEM4) (EC 3.1.2.2) (Carboxyl-terminal modulator protein) (Thioesterase superfamily member 4)	THEM4	LIVER	REGULATED	down	1.1171	1.05626	0.9825	-0.562967	-0.426196	-0.782915	-0.910489	-1.1785	-0.635959	0.346147	0.344601	0.34765
Q3U155	Coiled-coil domain-containing protein 174	CCDC174	LIVER	REGULATED	up	-2.69707	-2.79048	-10.8323	-4.18515	-3.94756	-4.53903	-2.02712	-2.75928	-1.44653	-1.71398	-1.7179	-1.71018
Q4PZA2	Endothelin-converting enzyme 1 (ECE-1) (EC 3.4.24.71)	ECE1	LIVER	REGULATED	up	-2.75339	-2.83081	-2.4905	-2.46553	-2.2887	-2.7361	-0.724569	-0.941888	-0.495052	0.817273	0.86048	0.773958
Q8BTV2	Cleavage and polyadenylation specificity factor subunit 7	CPSF7	LIVER	REGULATED	down	-1.4453	-2.10133	-1.67385	-1.92093	-1.93355	-1.97675	-2.84656	-3.78897	-2.17064	-2.45156	-2.44658	-2.45641
P16675	Lysosomal protective protein (EC 3.4.16.5) (Carboxypeptidase C) (Carboxypeptidase L) (Cathepsin A) (Protective protein cathepsin A) (PPCA) (Protective protein for beta-galactosidase) [Cleaved into: Lysosomal protective protein 32 kDa chain; Lysosomal protective protein 20 kDa chain]	CTSA	LIVER	REGULATED	down	2.64724	2.65172	2.46182	0.602179	0.688016	0.442261	0.974477	0.940478	1.01238	1.89192	1.94335	1.84005
Q80WC3	Trinucleotide repeat-containing gene 18 protein (Zinc finger protein 469)	TNRC18	LIVER	REGULATED	down	-0.850113	-0.896286	-0.881509	-2.69696	-2.71945	-2.74312	-4.75402	-4.58185	-5.00749	-1.56967	-1.58769	-1.55235
Q8K1E0	Syntaxin-5	STX5	LIVER	REGULATED	up	-2.31889	-2.64689	-2.07134	-1.62229	-1.86078	-1.4855	-0.679665	-0.0414202	-2.41058	1.14644	1.21242	1.07922
Q9D880	Mitochondrial import inner membrane translocase subunit TIM50	TIMM50	LIVER	REGULATED	up	-1.53293	-1.46375	-1.15731	-1.33694	-1.48439	-1.27117	0.885788	0.86745	0.90482	2.11923	2.14319	2.09553
Q9D824	Pre-mRNA 3'-end-processing factor FIP1 (FIP1-like 1 protein)	FIP1L1	LIVER	REGULATED	down	0.949847	0.581459	0.928689	0.349127	0.422174	0.203579	0.131738	-0.0471245	0.325028	0.125405	0.155154	0.0958609
P97347	Repetin	RPTN	LUNG	REGULATED	down	0.108725	-1.14749	-2.13119	0.732967	-0.0799903	1.30411	1.4094	0.191693	-1.59441	-7.28283	-8.35034	-8.10406
Q08351	Thrombopoietin receptor (TPO-R) (Myeloproliferative leukemia protein) (Proto-oncogene c-Mpl) (CD antigen CD110)	MPL	LUNG	REGULATED	up	-8.96035	-9.47865	-7.90173	-8.71344		-7.80475	-3.51841	-5.00683	-4.12365	-3.34547	-2.30096	-1.78398
Q8BGG7	Ubiquitin-associated and SH3 domain-containing protein B (EC 3.1.3.48) (Cbl-interacting protein p70) (Suppressor of T-cell receptor signaling 1) (STS-1) (T-cell ubiquitin ligand 2) (TULA-2) (Tyrosine-protein phosphatase STS1/TULA2)	UBASH3B	LUNG	REGULATED	up	-8.58135	-6.98168	-5.67776	-5.61788	-7.46494	-5.10907	-2.6726	-3.6398	-2.80059	-2.15673	-1.37057	-1.18436
P50228	C-X-C motif chemokine 5 (Cytokine LIX) (Small-inducible cytokine B5) [Cleaved into: GCP-2(1-78); GCP-2(9-78)]	CXCL5	LUNG	REGULATED	up	-4.55011	-4.22321	-4.3488	-3.88906	-4.11837	-2.39477	-0.0454326	-0.448204	-0.530452	0.631437	0.677612	0.998647
P97457	Myosin regulatory light chain 2, skeletal muscle isoform (Fast skeletal myosin light chain 2) (MLC2F)	MYLPF	LUNG	REGULATED	down	5.06137	4.76523	4.27779	5.20856	6.65872	5.19506	7.31022	5.55349	4.57422	0.053679	-0.566062	0.392172
P09542	Myosin light chain 3 (Myosin alkali light chain 1, ventricular/slow skeletal muscle isoform) (Myosin light chain 1, slow-twitch muscle B/ventricular isoform) (MLC1SB)	MYL3	LUNG	REGULATED	down	5.7042	5.19791	4.50498	6.15947	7.07351	5.55114	8.28745	6.49908	5.57704	0.289171	1.05292	1.57743
P0C191	Platelet glycoprotein VI (GPVI) (Glycoprotein 5)	GP6	LUNG	REGULATED	up	-5.4038	-5.04943	-3.90096	-4.37699	-4.55612	-3.37748	-1.23407	-2.23243	-1.96568	-0.74733	-0.602928	-0.0519532
P97361	BPI fold-containing family A member 1 (Palate lung and nasal epithelium clone protein)	BPIFA1	LUNG	REGULATED	down	-0.379196	-1.84501	-8.56102	-4.04592	0.324501	-5.36746	-6.03487	-7.22986	-2.84842	-9.06266	-9.65148	-10.4927
E9Q3E1	Aldehyde dehydrogenase family 3 member B2 (EC 1.2.1.3) (Aldehyde dehydrogenase 8)	ALDH3B2	LUNG	REGULATED	down	-2.88411	-4.91047	-5.4072	-0.892903	-2.4257	-1.48737	-0.630037	-2.64721	-3.95746	-8.84601	-8.74463	-7.76322
Q3V1D3	AMP deaminase 1 (EC 3.5.4.6) (AMP deaminase isoform M) (Myoadenylate deaminase)	AMPD1	LUNG	REGULATED	down	-0.338614	-1.08061	-1.10535	-0.182604	1.54077	0.128256	0.937407	-0.126956	-1.57675	-2.77718	-6.60455	-5.51413
Q9ET22	Dipeptidyl peptidase 2 (EC 3.4.14.2) (Dipeptidyl aminopeptidase II) (Dipeptidyl peptidase 7) (Dipeptidyl peptidase II) (DPP II) (Quiescent cell proline dipeptidase)	DPP7	LUNG	REGULATED	up	-8.21806	-17.5086	-8.06948	-6.78268	-9.14761	-8.77204	-6.70699	-8.14275	-8.25949	-6.91099	-3.90144	-4.03105
A2ABU4	Myomesin-3 (Myomesin family member 3)	MYOM3	LUNG	REGULATED	down	-2.63769	-3.0145	-4.45213	-4.60334	-1.5919	-3.26542	-2.43012	-4.31262	-5.14051	-7.64113	-7.87442	-6.46689
P70402	Myosin-binding protein H (MyBP-H) (H-protein)	MYBPH	LUNG	REGULATED	down	1.35845	0.431807	-0.821256	0.753893	3.23502	1.59548	2.58884	0.255175	-0.488233	-4.11165	-2.18637	-3.93779
P13412	Troponin I, fast skeletal muscle (Troponin I, fast-twitch isoform)	TNNI2	LUNG	REGULATED	down	3.63815	2.96897	2.40585	3.51743	4.96174	3.61024	5.19243	3.41871	2.44984	-0.325551	-1.12758	-0.999604
Q8K4F0	CD226 antigen (Platelet and T-cell activation antigen 1) (CD antigen CD226)	CD226	LUNG	REGULATED	up	-3.82433	-3.55917	-4.76747	-3.3458	-4.61808	-3.81518	-0.505317	-1.61888	-1.44473	-0.424079	-0.524347	-0.307807
P13542	Myosin-8 (Myosin heavy chain 8) (Myosin heavy chain, skeletal muscle, perinatal) (MyHC-perinatal)	MYH8	LUNG	REGULATED	down	4.85649	4.37948	3.98985	4.25304	6.14543	5.23364	6.96802	5.34383	4.42427	0.866679	0.747228	0.836388
P30355	Arachidonate 5-lipoxygenase-activating protein (FLAP) (MK-886-binding protein)	ALOX5AP	LUNG	REGULATED	up	-2.77011	-4.00513	-3.72724	-4.46786	-4.80048	-4.40257	-1.59125	-2.83652	-2.7669	-1.37464	1.58919	0.669915
Q99N32	Beta-klotho (BKL) (BetaKlotho) (Klotho beta-like protein)	KLB	LUNG	REGULATED	down	0.154794	-0.191508	-1.26523	-0.708685	1.0445	-0.641714	1.58564	0.592995	-0.81142	-3.92258	-4.67627	-3.37555
Q9QUM4	Signaling lymphocytic activation molecule (SLAM family member 1) (CD antigen CD150)	SLAMF1	LUNG	REGULATED	up	-3.58244	-3.16906	-2.98001	-2.38907	-3.06469	-2.58778	-0.248443	-1.10009	-1.09563	-0.000683167	-0.194592	0.480947
Q8K558	Trem-like transcript 1 protein (TLT-1) (Triggering receptor expressed on myeloid cells-like protein 1)	TREML1	LUNG	REGULATED	up	-0.0375428	-0.0874479	0.418442	0.701809	0.3579	0.708242	2.25517	2.00056	1.95229	3.00187	2.97845	3.62305
A2AUC9	Kelch-like protein 41 (Kelch repeat and BTB domain-containing protein 10)	KLHL41	LUNG	REGULATED	down	-0.157176	-1.45401	-1.22101	-0.725741	0.569762	-0.531981	0.141057	-1.40873	-1.83023	-4.54493	-4.23184	-3.82405
Q9QZ47	Troponin T, fast skeletal muscle (TnTf) (Fast skeletal muscle troponin T) (fTnT)	TNNT3	LUNG	REGULATED	down	5.24104	4.53015	4.07229	5.11646	5.70826	5.24505	6.52331	4.80503	3.70692	1.05504	1.47831	1.53222
O70443	Guanine nucleotide-binding protein G(z) subunit alpha (G(x) alpha chain) (Gz-alpha)	GNAZ	LUNG	REGULATED	up	-4.72161	-4.67175	-4.29222	-4.55833	-3.92195	-3.47112	-2.48871	-2.45195	-3.14493	-1.96067	-1.76559	-0.0394449
P20801	Troponin C, skeletal muscle (STNC)	TNNC2	LUNG	REGULATED	down	0.842922	0.317459	-0.388401	0.155395	2.22207	0.893147	1.94493	0.835771	-0.243588	-3.49751	-1.88702	-3.33282
Q9JLV5	Cullin-3 (CUL-3)	CUL3	LUNG	REGULATED	up	-4.68257	-3.90471	-5.70568	-3.2879	-2.84043	-3.23054	-0.376254	-2.73042	-0.836975	-1.22702	-1.03042	-2.03512
Q5SX40	Myosin-1 (Myosin heavy chain 1) (Myosin heavy chain 2x) (MyHC-2x) (Myosin heavy chain, skeletal muscle, adult 1)	MYH1	LUNG	REGULATED	down	6.36985	6.05562	5.62039	6.10498	7.73811	6.91084	8.27471	6.66092	5.76002	2.69744	2.82757	2.9892
Q60714	Long-chain fatty acid transport protein 1 (FATP-1) (Fatty acid transport protein 1) (EC 6.2.1.-) (Solute carrier family 27 member 1)	SLC27A1	LUNG	REGULATED	up	-4.19625	-4.40023	-3.3267	-4.07805	-4.61937	-4.07872	-1.1244	-4.53446	-2.33773	-1.20283	-1.65003	0.623098
O88186	Platelet glycoprotein IX (GP-IX) (GPIX) (Glycoprotein 9) (CD antigen CD42a)	GP9	LUNG	REGULATED	up	1.29513	1.41092	1.63397	2.0335	1.62216	1.89653	3.70288	3.09045	3.14806	4.16211	4.47581	4.58886
O89104	Synaptophysin-like protein 2 (Mitsugumin-29) (Mg29)	SYPL2	LUNG	REGULATED	down	-2.6868	-4.45632	-5.36909	-3.97369	-1.76305	-2.93231	-2.02382	-3.58913	-5.39461	-8.56026	-5.77772	-7.49264
P16015	Carbonic anhydrase 3 (EC 4.2.1.1) (Carbonate dehydratase III) (Carbonic anhydrase III) (CA-III)	CA3	LUNG	REGULATED	down	1.28057	0.457577	0.073795	2.29387	3.27832	2.29892	1.9277	1.64161	0.273318	-2.44513	-2.44297	-2.28809
P35441	Thrombospondin-1	THBS1	LUNG	REGULATED	up	2.52792	2.46912	2.95376	3.66897	2.95958	3.2909	4.82225	4.49153	4.79661	5.37773	5.42684	5.8681
Q64442	Sorbitol dehydrogenase (EC 1.1.1.14) (L-iditol 2-dehydrogenase)	SORD	LUNG	REGULATED	up	-3.50087	-2.22604	-2.54354	-1.8105	-2.49658	-2.15241	-0.453117	-0.926877	-0.791678	0.280035	0.103964	0.321142
Q9JIF9	Myotilin (Myofibrillar titin-like Ig domains protein) (Titin immunoglobulin domain protein)	MYOT	LUNG	REGULATED	down	0.249357	-0.528406	-1.21575	-1.13328	0.827411	-0.637451	0.889366	-1.04386	-1.52173	-3.21262	-3.30337	-3.28322
B2RPV6	Multimerin-1	MMRN1	LUNG	REGULATED	up	0.281461	0.433041	0.658001	0.598677	0.500566	0.406422	2.54289	2.2052	2.44687	2.78451	3.27952	3.6442
O88783	Coagulation factor V (Activated protein C cofactor) [Cleaved into: Coagulation factor V heavy chain; Coagulation factor V light chain]	F5	LUNG	REGULATED	up	-2.20369	-2.39179	-1.88336	-0.954259	-1.46609	-1.65635	0.0311347	-0.463747	-0.245259	0.134887	0.629934	1.02444
P68404	Protein kinase C beta type (PKC-B) (PKC-beta) (EC 2.7.11.13)	PRKCB	LUNG	REGULATED	up	-2.89152	-2.91194	-3.23034	-2.55902	-3.08503	-3.45513	-1.43831	-1.09662	-1.00459	0.033861	-0.312057	-0.331683
P58871	182 kDa tankyrase-1-binding protein	TNKS1BP1	LUNG	REGULATED	down	3.83237	3.49143	3.16327	4.24258	5.63706	3.7643	5.86905	4.35291	3.28965	0.864439	0.884874	1.17926
P62281	40S ribosomal protein S11	RPS11	LUNG	REGULATED	down	-2.6851	-4.12186	-5.97413	-2.10267	-0.799606	-1.86048	-0.798537	-2.74008	-2.05889	-7.68756	-4.98173	-8.65587
Q8K3H0	DCC-interacting protein 13-alpha (Dip13-alpha) (Adapter protein containing PH domain, PTB domain and leucine zipper motif 1)	APPL1	LUNG	REGULATED	up	-4.78516	-7.01794	-6.6892	-4.51409	-4.71072	-5.63306	-5.61415	-5.45118	-5.28709	-6.26041	-1.22907	-1.26656
Q91W36	Ubiquitin carboxyl-terminal hydrolase 3 (EC 3.4.19.12) (Deubiquitinating enzyme 3) (Ubiquitin thioesterase 3) (Ubiquitin-specific-processing protease 3)	USP3	LUNG	REGULATED	down	-8.52336	-1.8407	-0.349266	-6.88174	-0.919152	-0.122192	-5.78176	-5.87061	-3.42175	-3.80591	-13.212	-4.45439
Q09PK2	Retroviral-like aspartic protease 1 (EC 3.4.23.-) (Skin-specific retroviral-like aspartic protease) (SASPase) (Skin aspartic protease) (TPA-inducible aspartic proteinase-like protein)	ASPRV1	LUNG	REGULATED	down	-2.42741	-4.18421	-5.17748	-0.904826	-2.90338	-0.534874	-0.765016	-3.01146	-4.46256	-7.5562	-5.4679	-7.08461
Q80XL6	Acyl-CoA dehydrogenase family member 11 (ACAD-11) (EC 1.3.99.-)	ACAD11	LUNG	REGULATED	down	-5.62924	-4.46333	-5.78624	-4.81307	-2.76373	-4.87975	-0.155114	-4.2204	-6.58283	-7.61729	-8.32195	-7.61612
Q9QUM0	Integrin alpha-IIb (GPalpha IIb) (GPIIb) (Platelet membrane glycoprotein IIb) (CD antigen CD41) [Cleaved into: Integrin alpha-IIb heavy chain; Integrin alpha-IIb light chain]	ITGA2B	LUNG	REGULATED	up	1.81437	1.56456	1.82238	1.87352	1.87849	2.15048	3.81176	3.12526	3.1591	4.03669	4.51391	4.8683
Q8K209	Adhesion G-protein coupled receptor G1 (G-protein coupled receptor 56) (Serpentine receptor cyt28) [Cleaved into: ADGRG1 N-terminal fragment (ADGRG1 NT) (GPR56 N-terminal fragment) (GPR56 NT) (GPR56(N)) (GPR56 extracellular subunit) (GPR56 subunit alpha); ADGRG1 C-terminal fragment (ADGRG1-CT) (GPR56 C-terminal fragment) (GPR56 CT) (GPR56(C)) (GPR56 seven-transmembrane subunit) (GPR56 7TM) (GPR56…	ADGRG1	LUNG	REGULATED	up	-3.67278	-4.0726	-2.9464	-2.66997	-3.83258	-3.48788	-1.04973	-2.3619	-2.28898	-1.22325	-0.718477	-0.770755
Q01102	P-selectin (CD62 antigen-like family member P) (Granule membrane protein 140) (GMP-140) (Leukocyte-endothelial cell adhesion molecule 3) (LECAM3) (Platelet activation dependent granule-external membrane protein) (PADGEM) (CD antigen CD62P)	SELP	LUNG	REGULATED	up	-2.94439	-3.43244	-2.03815	-2.48206	-1.8038	-1.43846	-1.57814	-0.730102	-1.28501	0.0859979	-0.49207	-0.0111606
P04202	Transforming growth factor beta-1 (TGF-beta-1) [Cleaved into: Latency-associated peptide (LAP)]	TGFB1	LUNG	REGULATED	up	-1.66383	-1.9651	-1.86675	-1.2104	-1.7466	-2.02368	0.146756	-0.139038	0.143866	0.612426	0.8117	1.20161
Q07235	Glia-derived nexin (GDN) (Peptidase inhibitor 7) (PI-7) (Protease nexin 1) (PN-1) (Protease nexin I) (Serine protease-inhibitor 4) (Serpin E2)	SERPINE2	LUNG	REGULATED	up	1.43546	1.24448	1.63925	2.0648	1.31744	1.82943	3.40865	2.99954	3.23513	3.86346	4.16367	4.38596
Q99P58	Ras-related protein Rab-27B	RAB27B	LUNG	REGULATED	up	-0.308101	-0.208567	0.18382	0.242107	-0.164443	0.183405	1.65189	1.28992	1.45557	2.2128	2.55246	3.04189
P39655	Arachidonate 12-lipoxygenase, 12S-type (12S-LOX) (12S-lipoxygenase) (EC 1.13.11.31) (Lipoxin synthase 12-LO) (EC 3.3.2.-) (Platelet-type lipoxygenase 12) (P-12LO)	ALOX12	LUNG	REGULATED	up	1.37575	0.578774	0.884258	1.66782	1.00243	1.22954	2.89283	2.44457	2.37761	3.31445	3.65081	3.66578
O08742	Platelet glycoprotein V (GPV) (Glycoprotein 5) (CD antigen CD42d)	GP5	LUNG	REGULATED	up	1.84666	1.67205	2.13635	2.15984	1.48292	1.85523	3.45205	2.93812	2.83344	4.16883	4.67878	4.801
O35601	FYN-binding protein (Adhesion and degranulation promoting adaptor protein) (ADAP) (FYB-120/130) (p120/p130) (FYN-T-binding protein) (SLAP-130) (SLP-76-associated phosphoprotein)	FYB	LUNG	REGULATED	up	-0.719916	-0.777558	-0.40593	-0.013785	-0.220227	-0.106148	1.46389	0.969531	0.869437	1.89399	1.92096	2.28465
P32037	Solute carrier family 2, facilitated glucose transporter member 3 (Glucose transporter type 3, brain) (GLUT-3)	SLC2A3	LUNG	REGULATED	up	0.627616	0.414896	0.745293	1.06583	0.267647	0.476481	2.75471	1.88484	2.21143	2.6643	3.42653	3.62358
P56400	Platelet glycoprotein Ib beta chain (GP-Ib beta) (GPIb-beta) (GPIbB) (CD antigen CD42c)	GP1BB	LUNG	REGULATED	up	0.998381	1.16164	1.3958	1.44027	1.23311	1.59069	3.09246	2.59771	2.46281	3.58533	3.75418	4.17215
O35166	Golgi SNAP receptor complex member 2 (27 kDa Golgi SNARE protein) (Membrin)	GOSR2	LUNG	REGULATED	up	0.0382088	-1.64996	-4.99459	0.0754635	-4.75368	-5.22191	0.110785	0.440754	0.881568	0.349899	0.876692	0.962583
A2AQ07	Tubulin beta-1 chain	TUBB1	LUNG	REGULATED	up	1.12471	1.15084	1.57363	2.60603	1.50245	1.78714	2.92816	2.61696	2.70398	3.84041	3.68185	4.03299
P19788	Matrix Gla protein (MGP)	MGP	LUNG	REGULATED	down	0.471445	-0.291636	-0.534222	2.21462	1.53977	0.741931	-0.176159	-0.303321	-1.45389	-2.31593	-3.11088	-1.52239
Q9WUX5	Protein MRVI1 (Inositol 1,4,5-trisphosphate receptor-associated cGMP kinase substrate) (JAW1-related protein MRVI1) (Murine retrovirus integration site 1 protein)	MRVI1	LUNG	REGULATED	up	-4.03188	-3.85341	-3.4784	-2.38681	-3.56872	-3.65584	-1.40353	-2.1208	-2.10094	-1.44485	-1.16849	-0.9923
O35930	Platelet glycoprotein Ib alpha chain (GP-Ib alpha) (GPIb-alpha) (GPIbA) (Glycoprotein Ibalpha) (CD antigen CD42b)	GP1BA	LUNG	REGULATED	up	2.29204	2.17777	2.31073	2.40938	2.33919	2.34013	4.21998	3.68339	3.86399	4.14159	5.09208	5.24906
Q9R1A9	Three prime repair exonuclease 2 (EC 3.1.11.2) (3'-5' exonuclease TREX2)	TREX2	LUNG	REGULATED	down	0.448147	-1.61743	-1.67948	0.496593	-1.63072	0.73267	1.45057	-1.07608	-1.21683	-3.76724	-2.93743	-3.1385
Q60665	Ski-like protein (Ski-related oncogene) (Ski-related protein)	SKIL	LUNG	REGULATED	down	-0.205817	-0.368238	-0.34227	-1.27473	-1.90857	-2.36119	-1.6478	-0.771948	-1.22083	-2.14018	-2.63547	-2.4483
Q99MN9	Propionyl-CoA carboxylase beta chain, mitochondrial (PCCase subunit beta) (EC 6.4.1.3) (Propanoyl-CoA:carbon dioxide ligase subunit beta)	PCCB	LUNG	REGULATED	up	1.1899	1.65997	0.603218	1.62074	1.53877	0.562743	3.25875	2.85073	3.51811	3.71617	3.72324	3.80971
P12242	Mitochondrial brown fat uncoupling protein 1 (UCP 1) (Solute carrier family 25 member 7) (Thermogenin)	UCP1	LUNG	REGULATED	down	1.28742	0.510328	-0.811174	0.657621	2.9523	1.90842	2.49669	1.21367	0.486431	-2.24188	-2.17306	-1.59014
P68433	Histone H3.1	HIST1H3A; HIST1H3G; HIST1H3H; HIST1H3I	LUNG	REGULATED	down	1.45635	1.24629	1.89938	0.384082	0.530778	-1.26693	0.138263	-0.231679	-0.381793	-2.10168	0.072157	0.237088
Q9CQ19	Myosin regulatory light polypeptide 9 (Myosin regulatory light chain 2, smooth muscle isoform) (Myosin regulatory light chain 9)	MYL9	LUNG	REGULATED	up	1.51336	1.23632	1.87137	4.68967	2.93705	1.41335	3.53204	3.90915	3.23586	3.89047	3.97106	4.21642
P84228	Histone H3.2	HIST1H3B; HIST1H3C; HIST1H3D; HIST1H3E; HIST1H3F; HIST2H3B; HIST2H3C1; HIST2H3C2	LUNG	REGULATED	down	6.17273	5.6697	6.27475	5.38947	4.88487	5.07098	4.26478	4.49934	4.32813	2.59326	4.59537	4.84284
Q5XKE0	Myosin-binding protein C, fast-type (Fast MyBP-C) (C-protein, skeletal muscle fast isoform)	MYBPC2	LUNG	REGULATED	down	1.77824	1.10087	0.683662	1.36037	3.34255	1.99299	3.35918	1.56432	0.753184	-1.06773	-0.690623	-0.728664
Q05421	Cytochrome P450 2E1 (EC 1.14.13.-) (4-nitrophenol 2-hydroxylase) (EC 1.14.13.n7) (CYPIIE1) (Cytochrome P450-ALC) (Cytochrome P450-J)	CYP2E1	LUNG	REGULATED	down	-4.07433	-4.37245	-6.17511	-1.97591	-0.658775	-2.49803	-3.36316	-2.64939	-6.10495	-6.19821	-8.24031	-7.82214
Q9CQJ1	HIG1 domain family member 2A	HIGD2A	LUNG	REGULATED	down	-3.24362	-4.35626	-3.9749	-3.49927	-3.24805	-3.57729	-4.40233	-5.3001	-5.89209	-5.80752	-6.0061	-5.7128
Q9CZM2	60S ribosomal protein L15	RPL15	LUNG	REGULATED	down	-2.16383	-1.62377	-1.5447	-3.97195	-3.51354	-1.9665	-7.79773	-3.99321	-3.9481	-6.46697	-3.32234	-2.10349
Q9JHK5	Pleckstrin	PLEK	LUNG	REGULATED	up	1.41145	0.987256	1.77539	1.78496	1.62512	1.72872	2.56435	2.66421	2.66248	3.85766	3.73919	3.77287
Q8VHX6	Filamin-C (FLN-C) (ABP-280-like protein) (ABP-L) (Actin-binding-like protein) (Filamin-2) (Gamma-filamin)	FLNC	LUNG	REGULATED	down	-2.21177	-3.20206	-4.30457	-2.03558	-0.786371	-2.37873	-1.16616	-2.77269	-4.13325	-4.84674	-6.21257	-5.57228
O09165	Calsequestrin-1 (Calmitine) (Calsequestrin, skeletal muscle isoform)	CASQ1	LUNG	REGULATED	down	0.138539	-0.75422	-0.472497	-1.53542	0.476646	0.0379146	-0.406638	-0.77771	-1.31699	-3.10955	-1.68807	-2.3898
Q3UND0	Src kinase-associated phosphoprotein 2 (Pyk2/RAFTK-associated protein) (SKAP55 homolog) (SKAP-HOM) (Src family-associated phosphoprotein 2) (Src kinase-associated phosphoprotein 55-related protein) (Src-associated adapter protein with PH and SH3 domains)	SKAP2	LUNG	REGULATED	up	0.0257607	-0.216639	0.038267	0.533929	0.143882	0.136119	1.83519	1.28371	1.17603	2.29959	2.03353	2.69998
Q62234	Myomesin-1 (Myomesin family member 1) (Skelemin)	MYOM1	LUNG	REGULATED	down	-0.0398461	-0.778301	-1.67327	-0.309648	1.00705	-0.188347	0.45633	-0.670985	-1.6654	-3.2953	-2.85121	-2.3882
Q8R429	Sarcoplasmic/endoplasmic reticulum calcium ATPase 1 (SERCA1) (SR Ca(2+)-ATPase 1) (EC 3.6.3.8) (Calcium pump 1) (Calcium-transporting ATPase sarcoplasmic reticulum type, fast twitch skeletal muscle isoform) (Endoplasmic reticulum class 1/2 Ca(2+) ATPase)	ATP2A1	LUNG	REGULATED	down	2.73609	2.25008	1.97782	2.06367	4.07867	2.8923	4.03847	2.87677	1.97325	0.308825	0.291468	0.60869
P36536	GTP-binding protein SAR1a	SAR1A	LUNG	REGULATED	up	3.39871	2.34868	0.541472	3.85091	2.69731	0.608677	4.93654	4.62731	5.02402	4.37845	4.95856	4.61482
Q8BQ47	Protein canopy homolog 4 (Protein associated with Tlr4)	CNPY4	LUNG	REGULATED	down	-1.60306	0.352176	1.19381	-1.57188	0.285983	1.4326	-2.20423	-1.87632	-2.07836	-3.24913	-1.18702	-1.82789
A2CG49	Kalirin (EC 2.7.11.1) (Protein Duo) (Serine/threonine-protein kinase with Dbl- and pleckstrin homology domain)	KALRN	LUNG	REGULATED	up	-1.71627	-1.68936	-1.70133	-1.878	-1.40738	-1.44372	-0.450786	-0.295061	-0.34425	0.539897	0.729872	0.780812
P01872	Ig mu chain C region	IGHM	LUNG	REGULATED	up	1.29953	0.925551	1.22291	2.04552	2.15464	1.87732	3.64563	3.62899	3.34746	3.51009	3.30943	3.56616
O54890	Integrin beta-3 (Platelet membrane glycoprotein IIIa) (GPIIIa) (CD antigen CD61)	ITGB3	LUNG	REGULATED	up	0.90679	0.554998	0.965199	2.18258	1.73601	0.923821	2.78428	2.05965	2.17008	2.84132	3.15608	3.51124
Q8K1B8	Fermitin family homolog 3 (Kindlin-3) (Unc-112-related protein 2)	FERMT3	LUNG	REGULATED	up	1.47801	1.48561	1.83438	1.99136	1.70992	1.81882	2.77361	2.87462	2.7435	3.76493	3.823	4.2606
P36423	Thromboxane-A synthase (TS) (TXA synthase) (TXS) (EC 5.3.99.5) (Cytochrome P450 5A1)	TBXAS1	LUNG	REGULATED	up	-0.10645	-0.375376	0.458348	0.200443	-0.223393	0.241037	1.27418	1.02491	1.2504	1.88869	2.40439	2.72821
P43276	Histone H1.5 (H1 VAR.5) (H1b)	HIST1H1B	LUNG	REGULATED	down	4.77011	4.66942	5.07298	4.21457	4.14224	3.88562	3.82431	3.86454	3.77943	2.02097	3.34237	3.50936
E9PV24	Fibrinogen alpha chain [Cleaved into: Fibrinopeptide A; Fibrinogen alpha chain]	FGA	LUNG	REGULATED	up	2.9922	2.80842	3.33445	3.6532	3.24989	3.17198	4.66789	4.3525	4.60912	5.28056	5.20112	5.48843
Q5SS00	DBF4-type zinc finger-containing protein 2 homolog	ZDBF2	LUNG	REGULATED	down	6.28288	5.66253	5.98575	5.03578	4.94855	5.00293	4.79703	5.85387	5.29799	4.09039	4.06597	4.49037
P27573	Myelin protein P0 (Myelin peripheral protein) (MPP) (Myelin protein zero)	MPZ	LUNG	REGULATED	down	-0.211336	-1.00929	-1.13515	3.01726	1.73811	1.25077	0.594263	0.645278	-0.53693	-3.7835	-2.5897	-1.61846
Q99N28	Cell adhesion molecule 3 (Immunoglobulin superfamily member 4B) (IgSF4B) (Nectin-like protein 1) (NECL-1) (Synaptic cell adhesion molecule 3) (TSLC1-like protein 1)	CADM3	LUNG	REGULATED	down	-2.06389	-2.70776	-2.26408	-0.290261	-1.40418	-1.5905	-3.05113	-2.87171	-3.8084	-3.72346	-4.61098	-4.01111
Q8CG19	Latent-transforming growth factor beta-binding protein 1 (LTBP-1) (Transforming growth factor beta-1-binding protein 1) (TGF-beta1-BP-1)	LTBP1	LUNG	REGULATED	up	-2.94852	-3.07786	-2.08637	-2.57402	-1.73404	-2.30388	-0.967965	-1.02284	-1.00664	-0.371292	-1.13399	0.143288
Q99KR7	Peptidyl-prolyl cis-trans isomerase F, mitochondrial (PPIase F) (EC 5.2.1.8) (Cyclophilin D) (CyP-D) (CypD) (Cyclophilin F) (Rotamase F)	PPIF	LUNG	REGULATED	up	-0.176647	-0.490243	-0.0587018	0.752513	0.151223	0.0153822	1.84864	1.15198	1.10712	1.89108	1.88123	2.23049
Q9JKS4	LIM domain-binding protein 3 (Protein cypher) (Protein oracle) (Z-band alternatively spliced PDZ-motif protein)	LDB3	LUNG	REGULATED	down	3.14334	2.40993	1.83281	4.23119	4.67633	3.35988	4.83579	3.35012	2.49962	0.2379	0.811491	0.892986
P82198	Transforming growth factor-beta-induced protein ig-h3 (Beta ig-h3)	TGFBI	LUNG	REGULATED	up	-3.48924	-6.00291	-4.60929	-1.77137	-2.05753	-2.39388	-3.09837	-2.41288	-2.30648	-3.51567	-1.88218	-1.58957
Q8K0E8	Fibrinogen beta chain [Cleaved into: Fibrinopeptide B; Fibrinogen beta chain]	FGB	LUNG	REGULATED	up	2.48091	2.44665	2.92745	2.98183	2.73661	3.11197	3.71257	3.68967	3.91168	4.78868	4.7305	5.09984
P47811	Mitogen-activated protein kinase 14 (MAP kinase 14) (MAPK 14) (EC 2.7.11.24) (CRK1) (Mitogen-activated protein kinase p38 alpha) (MAP kinase p38 alpha)	MAPK14	LUNG	REGULATED	up	-3.93555	-4.43001	-3.26196	-2.39389	-3.58521	-3.35232	-3.16933	-2.59134	-2.98849	-1.76462	-1.55404	-1.67412
P60521	Gamma-aminobutyric acid receptor-associated protein-like 2 (GABA(A) receptor-associated protein-like 2) (Golgi-associated ATPase enhancer of 16 kDa) (GATE-16)	GABARAPL2	LUNG	REGULATED	up	-5.97201	-4.80672	-4.65879	-2.64989	-3.9615	-3.69451	-4.60162	-3.57668	-3.49895	-2.87872	-3.25975	-2.59773
Q9DC77	Small muscular protein (Stretch-responsive skeletal muscle protein) (Chisel protein)	SMPX	LUNG	REGULATED	down	0.908573	-0.0891109	-0.500379	1.35031	1.45573	0.501763	1.30684	0.665882	-0.431535	-2.101	-1.44913	-1.50364
Q9R0Q1	Synaptotagmin-like protein 4 (Exophilin-2) (Granuphilin)	SYTL4	LUNG	REGULATED	up	-0.67663	-0.843474	-0.711535	-0.526422	-0.425433	-0.340592	1.23724	0.568846	0.629414	1.09685	1.49459	1.79239
Q9Z126	Platelet factor 4 (PF-4) (C-X-C motif chemokine 4)	PF4	LUNG	REGULATED	up	4.8468	4.85825	5.30076	5.46017	4.80362	5.19166	6.88985	6.41503	6.53435	6.72475	7.21341	7.74687
P05977	Myosin light chain 1/3, skeletal muscle isoform (MLC1/MLC3) (MLC1F/MLC3F) (Myosin light chain alkali 1/2) (Myosin light chain A1/A2)	MYL1	LUNG	REGULATED	down	3.26891	2.85205	2.40859	4.54272	4.69401	3.65997	5.05966	3.81452	2.78897	0.762801	1.02014	1.72674
A2AAJ9	Obscurin (EC 2.7.11.1) (Obscurin-RhoGEF) (Obscurin-myosin light chain kinase) (Obscurin-MLCK)	OBSCN	LUNG	REGULATED	down	-4.07156	-4.96258	-6.27381	-4.78872	-6.49927	-6.51891	-3.66063	-4.21024	-6.28042	-6.62405	-7.459	-7.10211
Q8K1C0	Protein angel homolog 2	ANGEL2	LUNG	REGULATED	up	-4.86128	-5.6527	-5.1846	-3.03477	-5.70666	-4.96038	-3.92457	-4.56052	-4.38965	-3.40045	-2.3078	-3.62137
Q99LD4	COP9 signalosome complex subunit 1 (SGN1) (Signalosome subunit 1) (G protein pathway suppressor 1) (GPS-1) (JAB1-containing signalosome subunit 1)	GPS1	LUNG	REGULATED	up	-4.772	-5.05369	-5.77647	-4.64438	-6.20461	-5.16296	-3.95928	-4.72423	-5.1091	-4.05469	-2.36339	-2.39906
Q9D8E6	60S ribosomal protein L4	RPL4	LUNG	REGULATED	down	-1.0511	-0.490456	-0.558654	-1.782	-1.60596	-1.30639	-3.65949	-2.02886	-0.984975	-4.00319	-1.93125	-1.25238
P41245	Matrix metalloproteinase-9 (MMP-9) (EC 3.4.24.35) (92 kDa gelatinase) (92 kDa type IV collagenase) (Gelatinase B) (GELB)	MMP9	LUNG	REGULATED	up	-3.8928	-3.26317	-2.90852	-2.55769	-3.3768	-3.13376	-2.02815	-1.83635	-1.45198	-1.55625	-0.815248	-1.30541
A2ASS6	Titin (EC 2.7.11.1) (Connectin)	TTN	LUNG	REGULATED	down	-0.48332	-1.27869	-2.18693	-2.711	-0.222516	-1.35621	-0.58797	-2.12083	-1.43033	-3.32562	-2.81204	-2.94381
Q8CIT9	Suprabasin	SBSN	LUNG	REGULATED	down	-1.76626	-2.68708	-3.04236	-0.780416	-1.84482	-0.69528	0.240066	-1.3567	-2.57606	-4.03567	-4.7875	-3.68403
B2RY56	RNA-binding protein 25 (RNA-binding motif protein 25)	RBM25	LUNG	REGULATED	down	0.519321	-0.619518	-0.341522	-0.00923555	-0.475557	-0.24511	-1.34664	-0.813937	-1.11359	-1.68624	-1.44716	-2.40309
Q9JL99	C-type lectin domain family 1 member B (C-type lectin-like receptor 2) (CLEC-2)	CLEC1B	LUNG	REGULATED	up	-1.01874	-1.21792	-0.994596	-0.302989	-1.03198	-1.10964	0.990397	0.288626	0.222963	0.712286	0.749346	1.67457
Q9CYT6	Adenylyl cyclase-associated protein 2 (CAP 2)	CAP2	LUNG	REGULATED	up	-2.7364	-3.75045	-3.09477	0.344865	-0.54339	-1.55729	-0.190947	-0.409746	-1.47376	-1.30177	-1.22153	-0.833938
Q8BWB1	Synaptopodin 2-like protein	SYNPO2L	LUNG	REGULATED	down	-1.54847	-2.50842	-3.47534	-0.739502	-0.612276	-1.58844	-1.19903	-2.02127	-2.80813	-4.65908	-3.88043	-4.16061
Q3V2T4	Keratinocyte differentiation-associated protein	KRTDAP	LUNG	REGULATED	down	2.16596	1.18746	0.909594	3.45683	2.1476	3.41871	4.25743	2.63777	1.9517	-0.697562	-0.242058	0.264135
Q5SX39	Myosin-4 (Myosin heavy chain 2b) (MyHC-2b) (Myosin heavy chain 4)	MYH4	LUNG	REGULATED	down	5.12257	4.57715	4.24476	5.50741	6.32429	5.39306	7.39032	5.82263	4.9277	2.65205	3.14129	3.2945
O70622	Reticulon-2 (Neuroendocrine-specific protein-like 1) (NSP-like protein 1) (Neuroendocrine-specific protein-like I) (NSP-like protein I) (NSPLI)	RTN2	LUNG	REGULATED	down	-0.0438995	-0.608527	-1.01468	0.360253	1.38373	0.108672	1.25873	-0.217585	-1.22506	-2.34278	-2.34068	-1.79597
Q61510	E3 ubiquitin/ISG15 ligase TRIM25 (EC 6.3.2.n3) (Estrogen-responsive finger protein) (RING-type E3 ubiquitin transferase) (EC 2.3.2.27) (RING-type E3 ubiquitin transferase TRIM25) (Tripartite motif-containing protein 25) (Ubiquitin/ISG15-conjugating enzyme TRIM25) (Zinc finger protein 147)	TRIM25	LUNG	REGULATED	up	-0.537359	-1.50425	-4.65231	0.24276	-5.47272	-5.8069	-0.140978	0.0758212	-0.0641873	-0.542276	0.461701	0.731322
P21550	Beta-enolase (EC 4.2.1.11) (2-phospho-D-glycerate hydro-lyase) (Enolase 3) (Muscle-specific enolase) (MSE) (Skeletal muscle enolase)	ENO3	LUNG	REGULATED	down	-0.907334	-1.24825	-1.87631	-0.440136	0.601391	-0.384938	0.302051	-0.295093	-1.27976	-2.80808	-3.08167	-2.88283
Q8VCM7	Fibrinogen gamma chain	FGG	LUNG	REGULATED	up	3.27243	3.10947	3.68382	3.89722	3.15022	3.27927	4.50447	4.3197	4.57166	5.27386	5.43554	5.52176
Q8CIZ8	von Willebrand factor (vWF) [Cleaved into: von Willebrand antigen 2 (von Willebrand antigen II)]	VWF	LUNG	REGULATED	up	-0.078032	-0.383651	-0.413749	-0.119014	-0.244409	-0.539946	0.897664	0.836043	0.921365	1.55853	1.73128	1.77958
Q8R4E4	Myozenin-3 (Calsarcin-3) (FATZ-related protein 3)	MYOZ3	LUNG	REGULATED	up	-1.36814	-1.20044	-1.98187	-2.6623	-0.480662	-2.33607	0.304815	0.262487	-0.000386251	-0.461429	1.05967	1.29305
Q91W86	Vacuolar protein sorting-associated protein 11 homolog	VPS11	LUNG	REGULATED	down	-9.84792	-13.0002	-9.4469	-14.353	-15.0534	-13.1146	-12.9487	-25.9782	-3.88629	-16.7242	-11.2032	-10.1514
P35980	60S ribosomal protein L18	RPL18	LUNG	REGULATED	down	-1.03067	0.0537611	0.0278016	-1.61517	-1.03744	-0.702475	-3.49068	-1.58823	-0.326736	-3.362	-1.67866	-0.725623
Q9WV35	C->U-editing enzyme APOBEC-2 (EC 3.5.4.36) (mRNA(cytosine(6666)) deaminase 2)	APOBEC2	LUNG	REGULATED	down	1.80388	1.2023	0.797028	1.59792	3.39412	2.35778	3.13737	2.08782	1.00845	-0.488772	-0.261495	0.0681702
P12970	60S ribosomal protein L7a (Surfeit locus protein 3)	RPL7A	LUNG	REGULATED	down	-1.48282	-1.00005	-0.954827	-1.56723	-1.43261	-1.53035	-2.96359	-1.91456	-1.13763	-3.90661	-2.51676	-1.65171
P49290	Eosinophil peroxidase (EPO) (EC 1.11.1.7) [Cleaved into: Eosinophil peroxidase light chain; Eosinophil peroxidase heavy chain]	EPX	LUNG	REGULATED	down	-1.51655	-1.77794	-1.00446	-3.05648	-3.12608	-2.7072	-3.68845	-2.72868	-2.32516	-4.16221	-1.83955	-3.04014
P84099	60S ribosomal protein L19	RPL19	LUNG	REGULATED	down	0.434991	0.13041	0.247008	0.0686283	0.106397	-0.318146	-0.637164	-0.418147	-0.516523	-1.39767	-1.34334	-0.593437
Q9CQZ1	Heat shock factor-binding protein 1	HSBP1	LUNG	REGULATED	up	-2.34119	-3.14469	-4.21341	-1.25162	-3.25544	-3.48909	-2.52252	-1.61379	-1.7942	-2.30716	-0.274733	-0.74778
Q61136	Serine/threonine-protein kinase PRP4 homolog (EC 2.7.11.1) (PRP4 pre-mRNA-processing factor 4 homolog) (Pre-mRNA protein kinase)	PRPF4B	LUNG	REGULATED	down	-2.37755	-2.84474	-3.30515	-1.9925	-2.52304	-2.44385	-2.8664	-2.90693	-2.82587	-4.44735	-4.49291	-3.89042
P50462	Cysteine and glycine-rich protein 3 (Cysteine-rich protein 3) (CRP3) (LIM domain protein, cardiac) (Muscle LIM protein)	CSRP3	LUNG	REGULATED	down	1.98622	1.21093	0.661171	3.15335	3.30353	2.47229	2.58724	2.27463	1.09877	-0.164573	-0.202975	-0.303416
O09167	60S ribosomal protein L21	RPL21	LUNG	REGULATED	down	-2.09748	-1.0904	-1.36772	-3.20096	-2.8634	-2.19507	-3.81629	-2.67911	-1.22779	-4.93677	-2.66713	-1.72071
P13634	Carbonic anhydrase 1 (EC 4.2.1.1) (Carbonate dehydratase I) (Carbonic anhydrase I) (CA-I)	CA1	LUNG	REGULATED	up	-4.06513	-3.3993	-2.43785	-2.05218	-2.29062	-1.8514	-2.43178	-1.43132	-2.04115	-1.28632	-1.29809	-1.42313
P27005	Protein S100-A8 (Calgranulin-A) (Chemotactic cytokine CP-10) (Leukocyte L1 complex light chain) (Migration inhibitory factor-related protein 8) (MRP-8) (p8) (Pro-inflammatory S100 cytokine) (S100 calcium-binding protein A8)	S100A8	LUNG	REGULATED	up	-3.11437	-2.54965	-2.33373	-2.53213	-3.13267	-3.05021	-2.0357	-1.29645	-0.972488	-0.957866	-0.387876	-0.84902
P97443	Histone-lysine N-methyltransferase Smyd1 (EC 2.1.1.43) (CD8b-opposite) (SET and MYND domain-containing protein 1) (Zinc finger protein BOP) (m-BOP)	SMYD1	LUNG	REGULATED	down	1.00606	0.861071	0.136986	1.8942	2.39822	1.69099	2.03737	1.95104	0.445282	-1.50784	-0.567243	-0.212762
Q6YGZ1	Heparanase (EC 3.2.1.166) (Endo-glucoronidase) [Cleaved into: Heparanase 8 kDa subunit; Heparanase 50 kDa subunit]	HPSE	LUNG	REGULATED	up	-3.80372	-3.26903	-2.00348	-2.66456	-4.57862	-3.38451	-1.41236	-2.46084	-1.54963	-1.70222	-0.811943	-0.576906
Q8R143	Pituitary tumor-transforming gene 1 protein-interacting protein (Pituitary tumor-transforming gene protein-binding factor) (PBF) (PTTG-binding factor)	PTTG1IP	LUNG	REGULATED	up	-2.1451	-1.94901	-2.04549	-2.02953	-2.36975	-2.1098	-0.321601	-0.837272	-1.10567	-0.192942	-0.528409	0.267562
P68368	Tubulin alpha-4A chain (Alpha-tubulin 4) (Alpha-tubulin isotype M-alpha-4) (Tubulin alpha-4 chain)	TUBA4A	LUNG	REGULATED	up	1.87165	1.7508	2.43066	3.99265	2.4785	2.45883	2.63103	3.10376	2.99526	3.85728	3.61919	4.17495
Q8K1M6	Dynamin-1-like protein (EC 3.6.5.5) (Dynamin family member proline-rich carboxyl-terminal domain less) (Dymple) (Dynamin-related protein 1)	DNM1L	LUNG	REGULATED	up	-4.8619	-4.40824	-3.98128	-3.42657	-4.14073	-3.6639	-4.0944	-3.63351	-4.43418	-2.72717	-2.52405	-2.29873
Q08093	Calponin-2 (Calponin H2, smooth muscle) (Neutral calponin)	CNN2	LUNG	REGULATED	up	2.09758	1.86767	2.00931	2.94888	2.28363	2.34888	2.99276	2.99219	2.9967	3.81588	3.84792	3.77954
Q80VJ2	Steroid receptor RNA activator 1 (Steroid receptor RNA activator protein) (SRAP)	SRA1	SPLEEN	REGULATED	up	-9.4881	-12.9413	-7.07959		-2.06096	-3.77798	-1.43405	-1.28885	-2.15969	-2.04807	-1.90297	-4.96496
P59235	Nucleoporin Nup43 (Nup107-160 subcomplex subunit Nup43)	NUP43	SPLEEN	REGULATED	up	-7.53614	-8.29437	-4.84089	-6.65315	-1.44857	-4.72868	-1.41985	-1.44591	-0.449292	-0.300197	0.146503	-3.5203
Q9D8S9	BolA-like protein 1	BOLA1	SPLEEN	REGULATED	up	-4.50178	-3.16256	-4.72422	-3.17168	-1.94047	-2.07141	-0.64068	-0.79216	0.184273	0.992267	1.35642	-0.525201
P21836	Acetylcholinesterase (AChE) (EC 3.1.1.7)	ACHE	SPLEEN	REGULATED	down	1.97967	0.541738	-0.114706	-0.762434	-4.48252	-1.6049	-5.92161	-5.74202	-6.60902	-3.91042	-7.87284	-3.03875
Q60997	Deleted in malignant brain tumors 1 protein (Apactin) (CRP-ductin) (Glycoprotein 300) (gp300) (Hensin) (Mucin-like glycoprotein) (Muclin) (Vomeroglandin) (p80)	DMBT1	SPLEEN	REGULATED	down	-3.07089	-3.72726	-4.3573	-7.50957	-7.88341	-6.68273	-8.58703	-7.96377	-12.8725	-9.32111	-11.6925	-7.01693
P27106	Muellerian-inhibiting factor (Anti-Muellerian hormone) (AMH) (Muellerian-inhibiting substance) (MIS)	AMH	SPLEEN	REGULATED	down	-3.20437	-2.87379	-4.08101	-6.63126	-5.1845	-2.98646	-5.83859	-5.79061	-5.41831	-9.80852	-10.5974	-6.38379
Q9QXF8	Glycine N-methyltransferase (EC 2.1.1.20)	GNMT	SPLEEN	REGULATED	down	-0.482913	-0.917611	-3.4076	-1.98724	-5.34476	-1.76081	-5.28205	-4.41352	-5.59352	-11.3887	-16.306	-1.66819
Q8R5K4	Nucleolar protein 6 (Nucleolar RNA-associated protein) (Nrap)	NOL6	SPLEEN	REGULATED	up	-4.92983	-4.05054	-3.48497	-4.84572	-1.10123	-6.48344	-0.402774	-0.595183	-0.277532	0.892681	-0.436771	-1.00776
Q8R1M2	Histone H2A.J (H2a/j)	H2AFJ	SPLEEN	REGULATED	up	-7.70049	-4.26793	-8.08128	-8.16478	-5.76249	-6.46899	-3.78452	-6.01063	-3.40322	-2.92504	-1.69014	-1.87306
Q9DBD5	Proline-, glutamic acid- and leucine-rich protein 1 (Modulator of non-genomic activity of estrogen receptor)	PELP1	SPLEEN	REGULATED	down	0.160891	-0.761514	-0.334718	0.0169059	0.254233	-2.55924	-4.07469	0.156452	-0.276686	-4.47351	-4.82803	-5.2127
Q8VCN6	CD99 antigen (Paired immunoglobin-like type 2 receptor-ligand) (PILR-L) (CD antigen CD99)	CD99	SPLEEN	REGULATED	up	-2.14658	-1.71322	-1.36002	-1.79166	-0.442145	-3.03316	0.966743	0.17994	2.22076	4.168	3.7049	-0.0362587
Q9DCK3	Tetraspanin-4 (Tspan-4) (Transmembrane 4 superfamily member 7)	TSPAN4	SPLEEN	REGULATED	up	-6.07214	-6.20014	-11.9123	-6.07223	-2.40988	-3.8568	-7.96483	-8.38161	-10.3605	-4.89312	-3.07727	-2.72377
Q8CG03	cGMP-specific 3',5'-cyclic phosphodiesterase (EC 3.1.4.35) (cGMP-binding cGMP-specific phosphodiesterase) (CGB-PDE)	PDE5A	SPLEEN	REGULATED	up	-7.36458	-8.17435	-7.90957	-9.22289	-5.64643	-9.23922	-6.43179	-5.1876	-4.2006	-1.43155	-4.18127	-5.73452
Q8K2Q9	Shootin-1 (Shootin1)	SHTN1	SPLEEN	REGULATED	down	4.81628	3.44712	2.35207	2.93234	-0.482543	1.41629	-1.24161	-1.3026	-3.26256	-1.11907	-5.60276	1.54441
Q5H8C4	Vacuolar protein sorting-associated protein 13A (Chorea-acanthocytosis protein homolog) (Chorein)	VPS13A	SPLEEN	REGULATED	up	-7.80698	-5.37584	-6.01951	-5.60161	-2.91281	-4.67786	-2.29565	-2.52633	-2.07213	-0.754557	-3.02655	-4.23251
P15947	Kallikrein-1 (EC 3.4.21.35) (Glandular kallikrein K1) (KAL-B) (Renal kallikrein) (Tissue kallikrein-6) (mGK-6)	KLK1	SPLEEN	REGULATED	down	2.94096	1.54559	1.44525	1.97692	-0.900592	0.484878	-1.44844	-1.01558	-3.36482	-4.17234	-4.93859	0.936656
Q9CRC8	Leucine-rich repeat-containing protein 40	LRRC40	SPLEEN	REGULATED	down	-1.1466	-3.36378	0.128909	-1.96435	-1.37703	-1.53401	-0.285269	-1.02301	-1.70026	-6.91897	-2.32321	-7.10034
Q8K1C0	Protein angel homolog 2	ANGEL2	SPLEEN	REGULATED	up	-4.40012	-3.39423	-4.85466	-3.42285	-0.847611	-3.18581	-1.43061	-0.710331	-1.40602	-0.331629	0.202999	-2.2452
P59016	Vacuolar protein sorting-associated protein 33B	VPS33B	SPLEEN	REGULATED	down	-1.91568	-2.7266	-3.10684	-3.41945	-3.66334	-3.81607	-3.14888	-4.24161	-3.91218	-4.11259	-8.52497	-6.54158
Q8K0C5	Zymogen granule membrane protein 16 (Zymogen granule protein 16) (Secretory lectin ZG16)	ZG16	SPLEEN	REGULATED	down	4.02208	2.68345	1.78767	1.77028	-0.15941	1.00336	-0.955506	-0.754835	-1.32145	-1.38735	-1.12571	-0.0174638
P43137	Lithostathine-1 (Islet of Langerhans regenerating protein 1) (REG 1) (Pancreatic stone protein 1) (PSP) (Pancreatic thread protein 1) (PTP) (Regenerating protein 1)	REG1	SPLEEN	REGULATED	down	2.04617	0.821397	1.64202	1.02632	-1.09371	-0.846637	-2.23798	-1.96201	-2.07792	-2.48214	-2.92209	-0.896366
P45481	CREB-binding protein (EC 2.3.1.48)	CREBBP	SPLEEN	REGULATED	up	-4.65744	-3.15856	-2.56779	-1.35522	-0.760192	-1.22421	0.0287125	-0.749073	-0.405159	-0.32673	0.207525	-1.39192
Q80UP5	Ankyrin repeat domain-containing protein 13A	ANKRD13A	SPLEEN	REGULATED	up	-3.17952	-3.17599	-2.92936	-3.29274	-1.66094	-2.07255	-0.93721	-1.27818	-1.26337	0.360264	0.030322	-0.891569
P05208	Chymotrypsin-like elastase family member 2A (EC 3.4.21.71) (Elastase-2) (Elastase-2A)	CELA2A	SPLEEN	REGULATED	down	8.04926	6.83449	6.64395	6.56366	4.5435	5.6157	3.85522	4.11945	3.45612	1.97837	2.39253	5.48571
Q8K2F0	Bromodomain-containing protein 3 (Bromodomain-containing FSH-like protein FSRG2)	BRD3	SPLEEN	REGULATED	up	-2.8098	-3.42977	-0.040848	0.418778	-1.07607	-3.26858	0.16828	0.962197	-1.3193	0.0165052	0.834336	1.76468
Q8CGP2	Histone H2B type 1-P	HIST1H2BP	SPLEEN	REGULATED	up	-5.21936	-5.14301	-4.26719	-3.42501	-4.75257	-5.15982	-3.89585	-4.52594	-4.32137	-1.91327	-2.98878	-1.49142
Q9D2J7	Ankyrin repeat and EF-hand domain-containing protein 1 (Ankyrin repeat domain-containing protein 5)	ANKEF1	SPLEEN	REGULATED	down	-0.708726	-1.79233	-2.86637	-2.44541	-4.12693	-2.85216	-3.3644	-5.01148	-3.97916	-5.12392	-6.46005	-4.68201
O88665	Bromodomain-containing protein 7 (75 kDa bromodomain protein)	BRD7	SPLEEN	REGULATED	up	-2.47514	-3.25899	-7.13753	-2.44944	-0.786463	-2.4777	-0.687471	0.201847	-0.902371	-0.625795	-1.44211	-1.11185
Q61699	Heat shock protein 105 kDa (42 degrees C-HSP) (Heat shock 110 kDa protein) (Heat shock-related 100 kDa protein E7I) (HSP-E7I)	HSPH1	SPLEEN	REGULATED	up	-4.32321	-2.91165	-3.59731	-3.83519	-2.07083	-3.21498	-1.5199	-1.52482	-0.891275	0.328951	-0.113964	-2.15574
Q80U16	Protein FAM65B	FAM65B	SPLEEN	REGULATED	down	-1.71183	-3.24468	-0.764877	-0.992652	-2.00507	-9.02176	-8.43818	-1.62004	-4.45417	-8.60335	-3.16214	-4.54702
P07146	Anionic trypsin-2 (EC 3.4.21.4) (Anionic trypsin II) (Pretrypsinogen II) (Serine protease 2)	PRSS2	SPLEEN	REGULATED	down	7.19754	5.83934	5.18713	5.5363	3.68621	4.70974	2.93915	2.96011	2.27029	0.860463	1.1218	4.80749
P10417	Apoptosis regulator Bcl-2	BCL2	SPLEEN	REGULATED	up	-3.49693	-2.22666	-1.06425	-1.14529	0.382092	-0.468351	0.129145	-0.145231	-0.132492	0.558153	0.37577	0.341892
P22366	Myeloid differentiation primary response protein MyD88	MYD88	SPLEEN	REGULATED	down	-4.53391	-3.33699	-1.87195	-2.79928	-1.38684	-7.68682		-1.07986	-3.87512	-10.6225	-3.46504	-5.78747
Q9D8N2	Protein FAM45A	FAM45A	SPLEEN	REGULATED	down	-0.581712	-0.974491	-1.20158	-0.690009	-1.78222	-0.601822	-0.777572	-1.70066	-1.06884	-1.27822	-7.05786	-4.94016
Q9CQC2	Colipase	CLPS	SPLEEN	REGULATED	down	3.83738	2.95493	1.92305	2.07349	0.405658	1.07857	-0.66445	-0.415382	-0.242061	-1.4939	-1.70351	0.918226
P00688	Pancreatic alpha-amylase (PA) (EC 3.2.1.1) (1,4-alpha-D-glucan glucanohydrolase)	AMY2	SPLEEN	REGULATED	down	10.7202	9.52042	8.3662	9.0076	6.99902	8.24265	6.59763	6.82265	5.78838	4.28877	4.45152	8.38028
Q8BFQ8	Parkinson disease 7 domain-containing protein 1	PDDC1	SPLEEN	REGULATED	down	-0.794089	-0.793663	-0.763937	-2.45428	-1.06272	-1.29276	-1.45528	-2.98922	-1.83526	-5.51231	-3.5201	-2.87805
A2ARA8	Integrin alpha-8 [Cleaved into: Integrin alpha-8 heavy chain; Integrin alpha-8 light chain]	ITGA8	SPLEEN	REGULATED	up	-3.33571	-1.63825	-0.381	-1.32309	0.909612	-0.460833	1.56955	0.713989	0.616995	1.98395	1.0988	0.00421783
Q8R4Y0	Fc receptor-like protein 1 (FcR-like protein 1) (FcRL1) (BXMAS1-like protein 1) (mBXMH1) (Fc receptor homolog 1) (FcRH1) (moFcRH1) (IFGP family protein 1) (mIFGP1) (CD antigen CD307a)	FCRL1	SPLEEN	REGULATED	up	-1.29062	-0.952671	-0.551197	-0.174604	0.98907	-0.511725	0.805105	0.642162	1.08698	1.66228	1.47977	1.26338
O88874	Cyclin-K	CCNK	SPLEEN	REGULATED	down	-0.641262	-0.877811	-1.12226	-2.08477	-1.61702	-0.55072	-1.43632	-2.2517	-0.561105	-2.59497	-2.94849	-5.11751
Q91X79	Chymotrypsin-like elastase family member 1 (EC 3.4.21.36) (Elastase-1)	CELA1	SPLEEN	REGULATED	down	7.1994	5.97378	5.83841	5.99581	3.58428	4.75788	3.18645	3.37008	2.56496	1.31342	1.89776	5.20204
Q6NZQ2	Probable ATP-dependent RNA helicase DDX31 (EC 3.6.4.13) (DEAD box protein 31)	DDX31	SPLEEN	REGULATED	up	-2.76469	-3.49657	-1.7905	-1.86215	-1.03977	-3.10054	-1.47447	-1.15319	-0.948889	0.0714275	0.554782	-1.12876
Q9JHW4	Selenocysteine-specific elongation factor (Elongation factor sec) (Eukaryotic elongation factor, selenocysteine-tRNA-specific) (mSelB)	EEFSEC	SPLEEN	REGULATED	up	-1.51166	-2.08799	-1.45751	-0.336882	-1.75059	-5.01551	-1.78224	-2.11061	-1.81904	-0.618854	1.27549	1.34233
