# Supplementary material for: Distinct and diverse chromatin proteomes of ageing mouse organs reveal protein signatures that correlate with physiological functions
Source: eLife journal article supplement (doi:10.7554/elife.73524), 2022-03-08
Supplement: supp [file elife-73524-supp-v1.zip › elife_poa_e73524_Supplementary_file_5.xlsx]

## Sheet: Sheet1
Antibodies	Company or Refence	Catalog Number	Western-blot
Goat Anti-Mouse IgG, H&L Chain Specific Peroxidase Conjugate	Merckbi	401253	1:10000
Anti-Rabbit IgG (whole molecule)–Peroxidase antibody produced in goat	Sigma	A0545	1:10000
anti-guinea pig Peroxidase antibody	gift from Benny Garfinkel		1:10000
SIRT3	Cell Signaling	2627S	1:1000
NEDD4	Cell Signaling	2740S	1:500
PSME2	Cell signaling	2409S	1:500
Sirt5	Cell signaling	8782S	1:1000
CHD2	Cell Signaling	4170S	1:500
KAT2A/GCN5	Cell Signaling	3305	1:500
PSMD14	Cell Signaling	4197S	1:1000
RING1B/RNF2	Cell Signaling	5694P	1:500
H3	Abcam	ab1791	1:20000
macroH2A.1	Abcam	ab37264	1:1000
macroH2A2.2	Abcam	ab4173	1:1000
RNF20	Cell signaling	94255	1:1000
H3acetyl	Active motif	39139	1:500
beta Actin	sigma	A5441	1:5000
FBX041	Protein Tec	24519-1-AP	1:500
HP1BP3	gift from Benny Garfinkel		1:2000
