# Supplementary figures and images for: Distinct and diverse chromatin proteomes of ageing mouse organs reveal protein signatures that correlate with physiological functions
Source: eLife journal article supplement (doi:10.7554/elife.73524), 2022-03-08

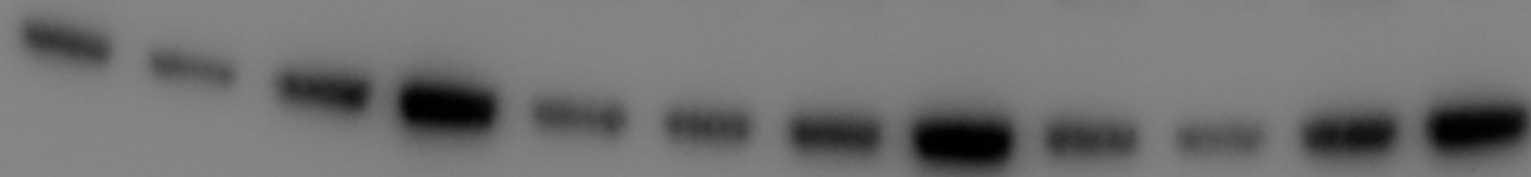

Supplement: supp [file elife-73524-supp-v1.zip]

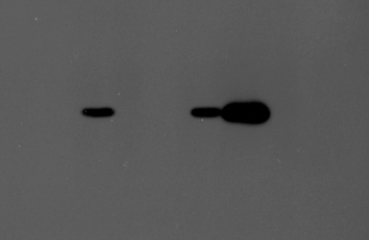

Supplement: supp [file elife-73524-supp-v1.zip]

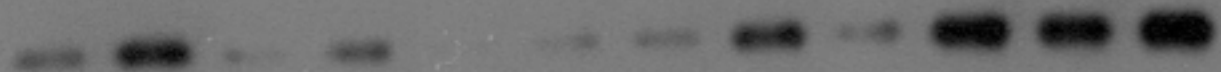

Supplement: supp [file elife-73524-supp-v1.zip]

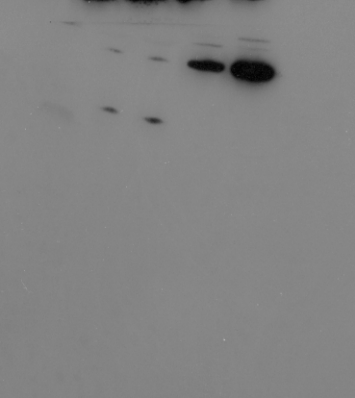

Supplement: supp [file elife-73524-supp-v1.zip]

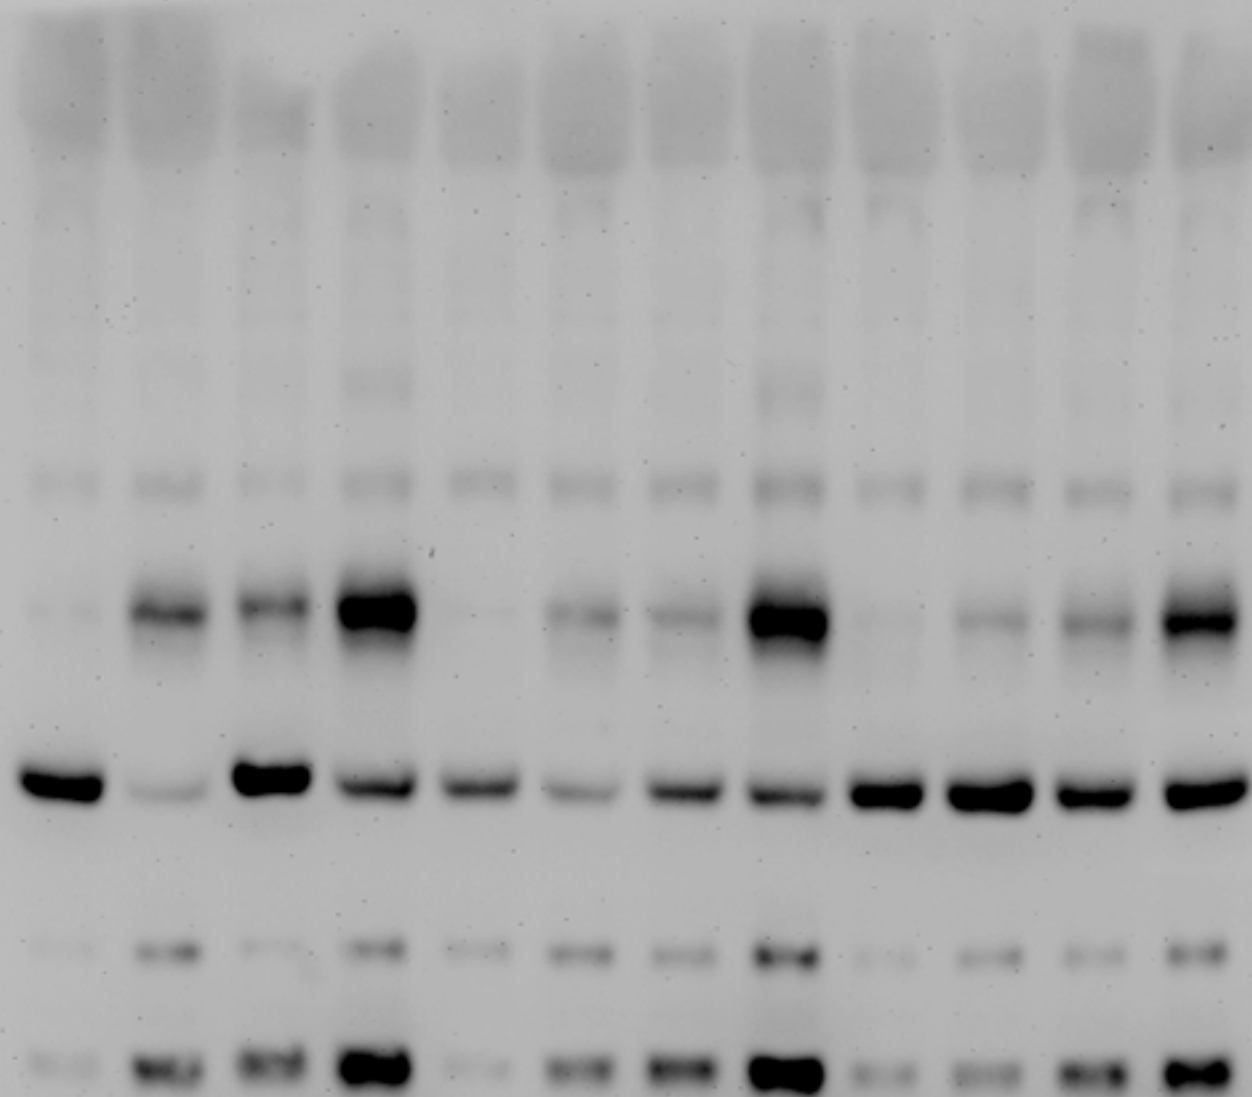

Supplement: supp [file elife-73524-supp-v1.zip]

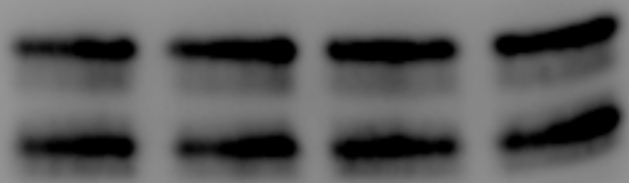

Supplement: supp [file elife-73524-supp-v1.zip]

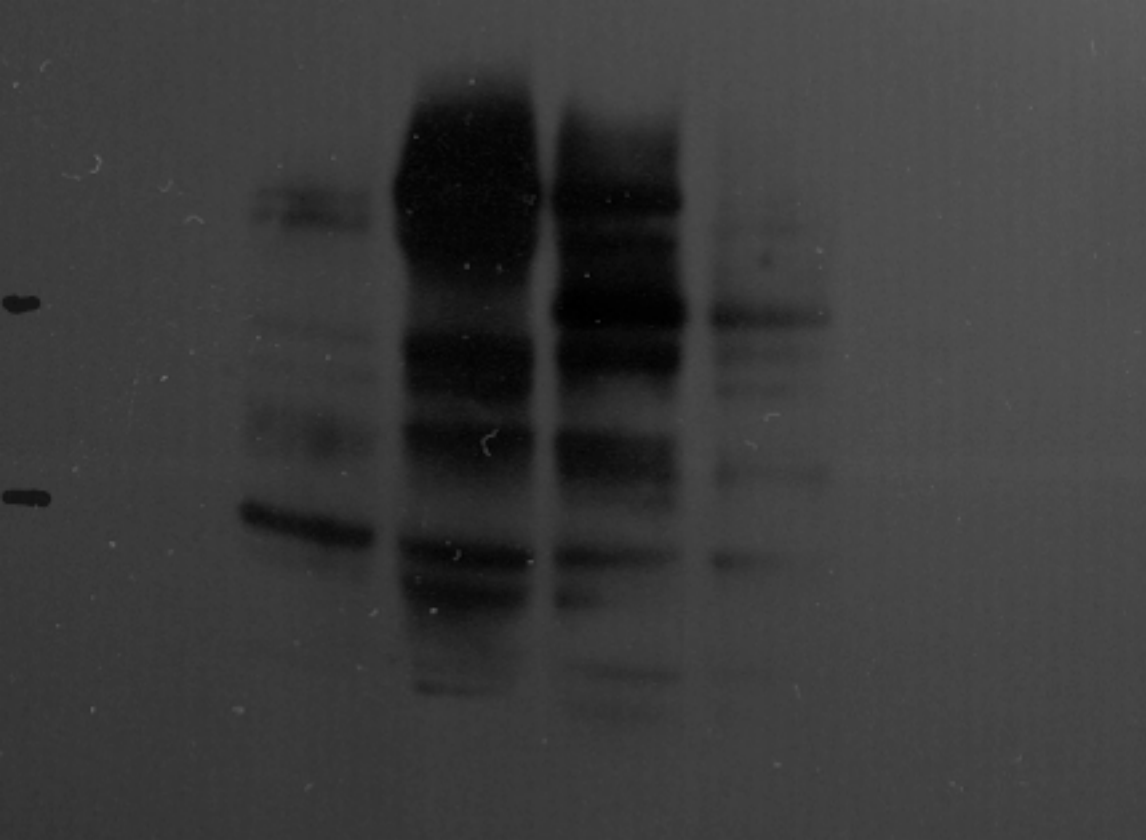

Supplement: supp [file elife-73524-supp-v1.zip]

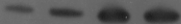

Supplement: supp [file elife-73524-supp-v1.zip]

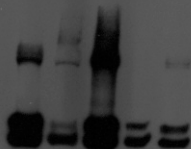

← LAMIN

Supplement: supp [file elife-73524-supp-v1.zip]

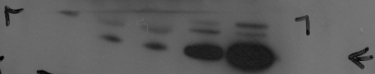

35  
25

15

10

H2A2.1

Supplement: supp [file elife-73524-supp-v1.zip]

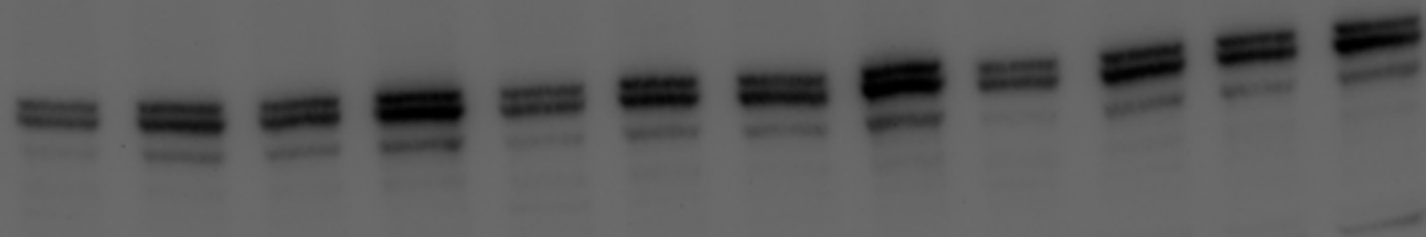

Supplement: supp [file elife-73524-supp-v1.zip]

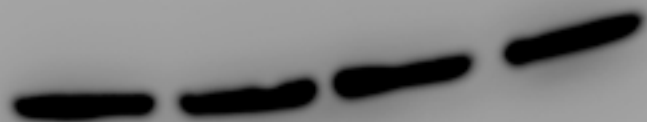

Supplement: supp [file elife-73524-supp-v1.zip]

✓

7

180

130

85

—  
—  
—

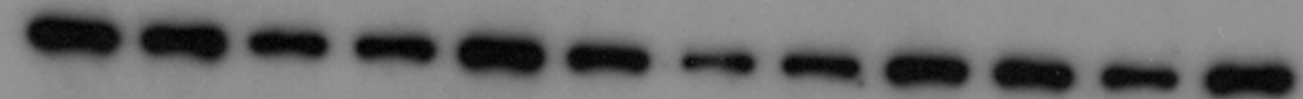

←

ENF20

Supplement: supp [file elife-73524-supp-v1.zip]

SIRTS

35

25

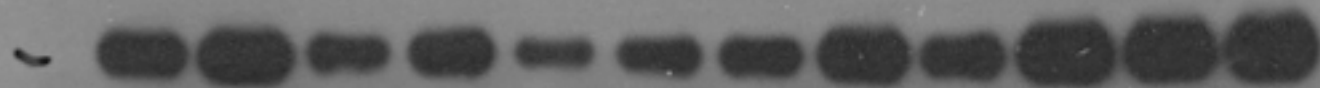

Supplement: supp [file elife-73524-supp-v1.zip]

M3

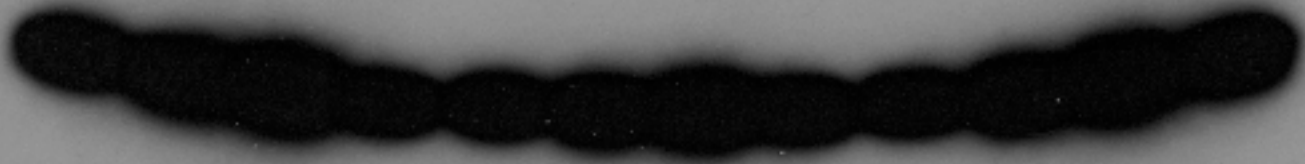

15

10

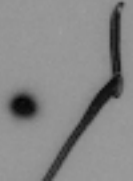

Supplement: supp [file elife-73524-supp-v1.zip]

r43  
34  
26

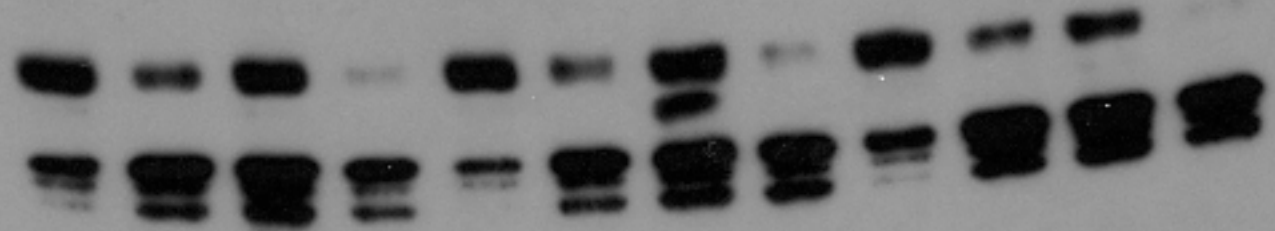

← RNF2 ✓

Supplement: supp [file elife-73524-supp-v1.zip]

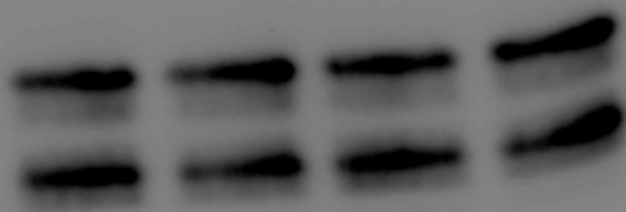

Supplement: supp [file elife-73524-supp-v1.zip]

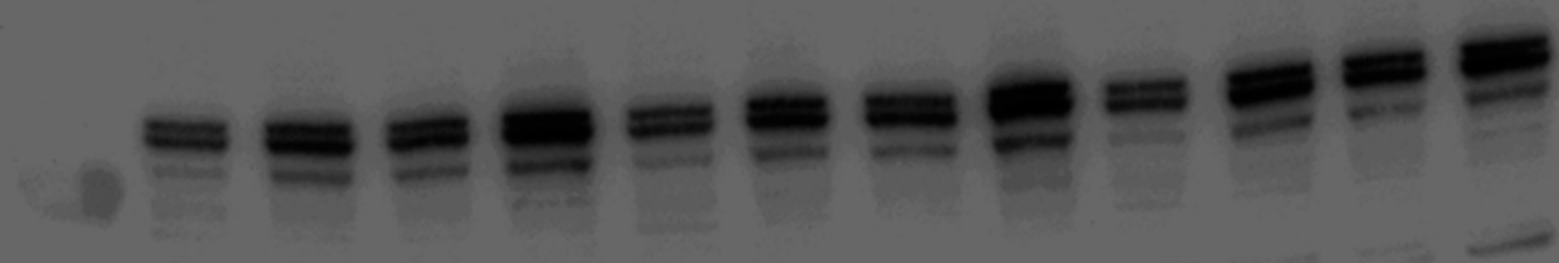

Supplement: supp [file elife-73524-supp-v1.zip]

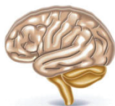

# BRAIN

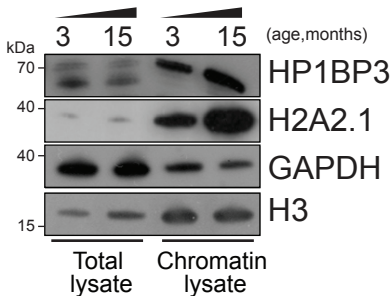

Supplement: supp [file elife-73524-supp-v1.zip › elife_poa_e73524_Figure_1_figure_supplement_2.pdf]

S3

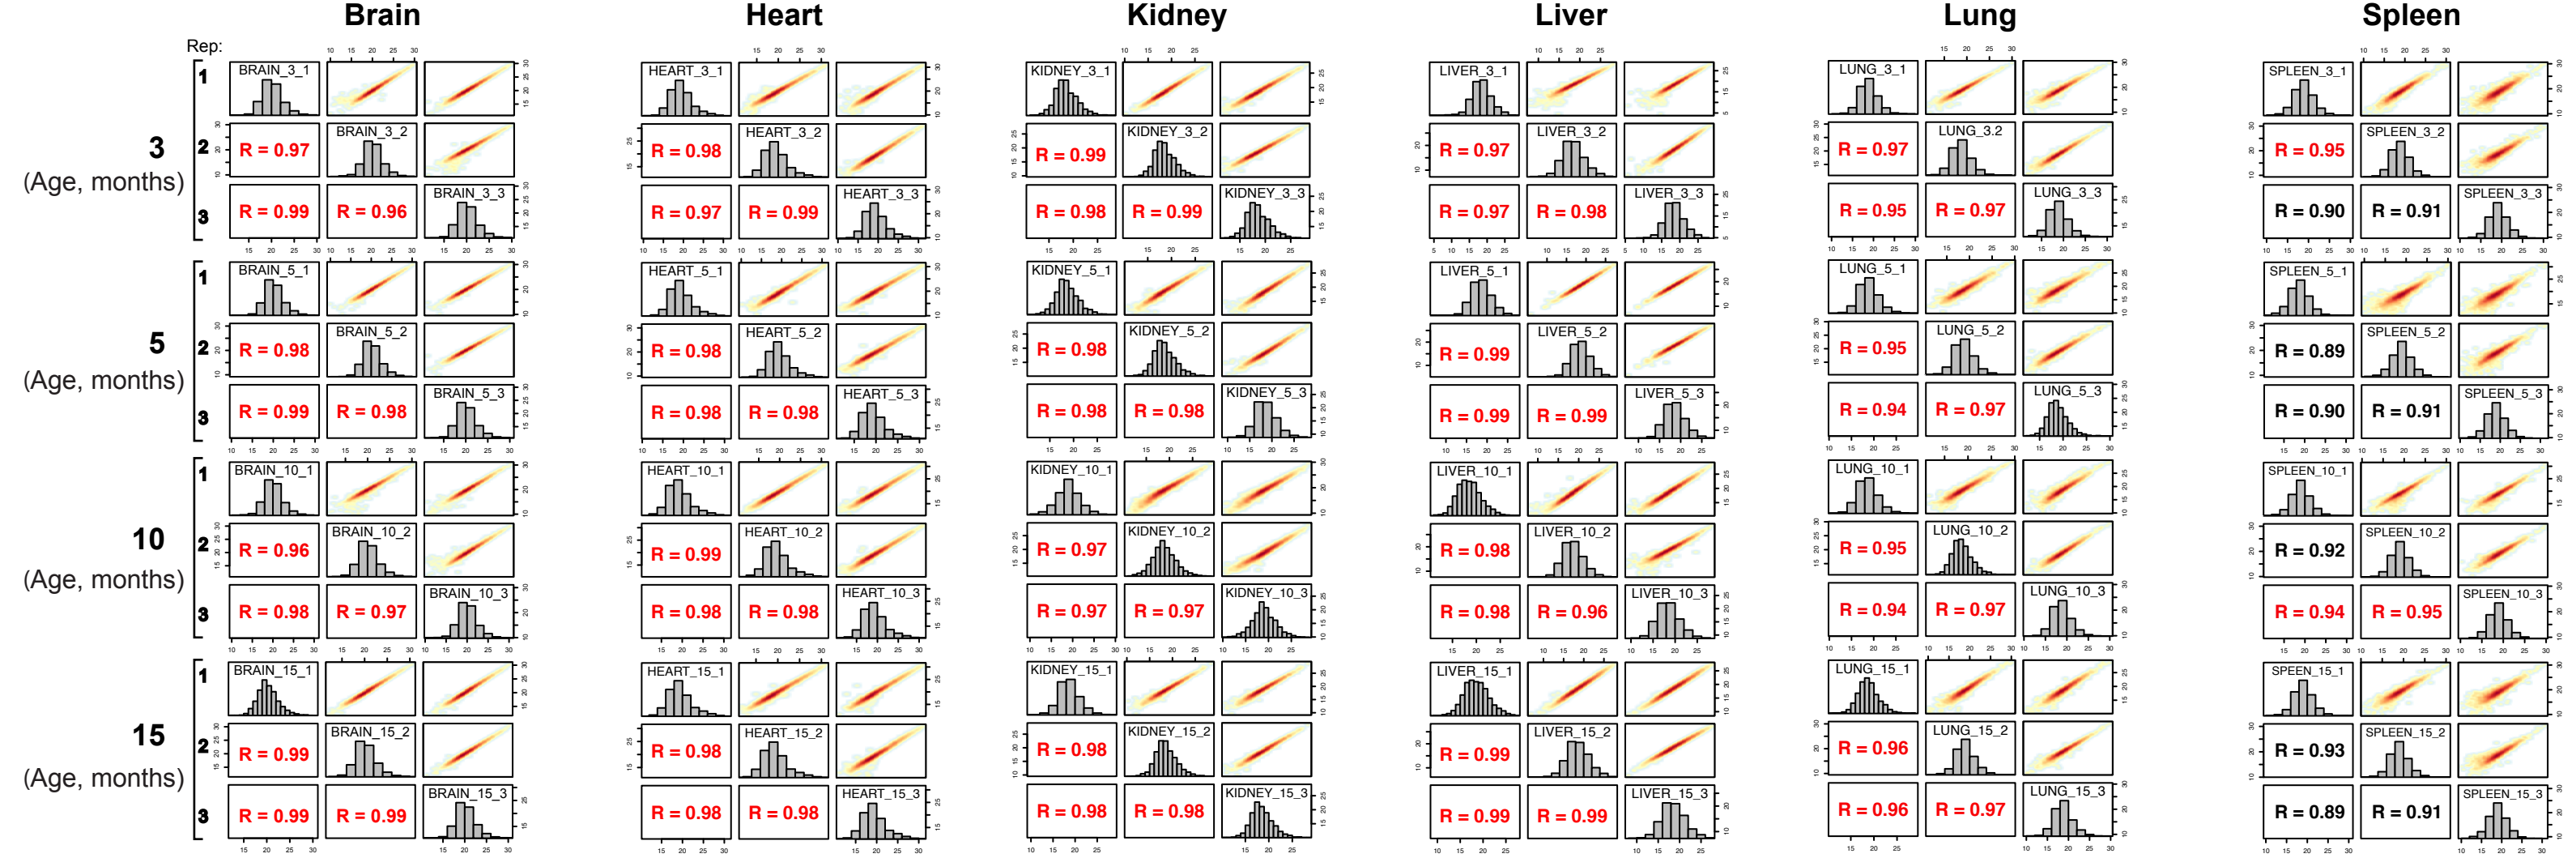

Supplement: supp [file elife-73524-supp-v1.zip › elife_poa_e73524_Figure_3_figure_supplement_1.pdf]

**A**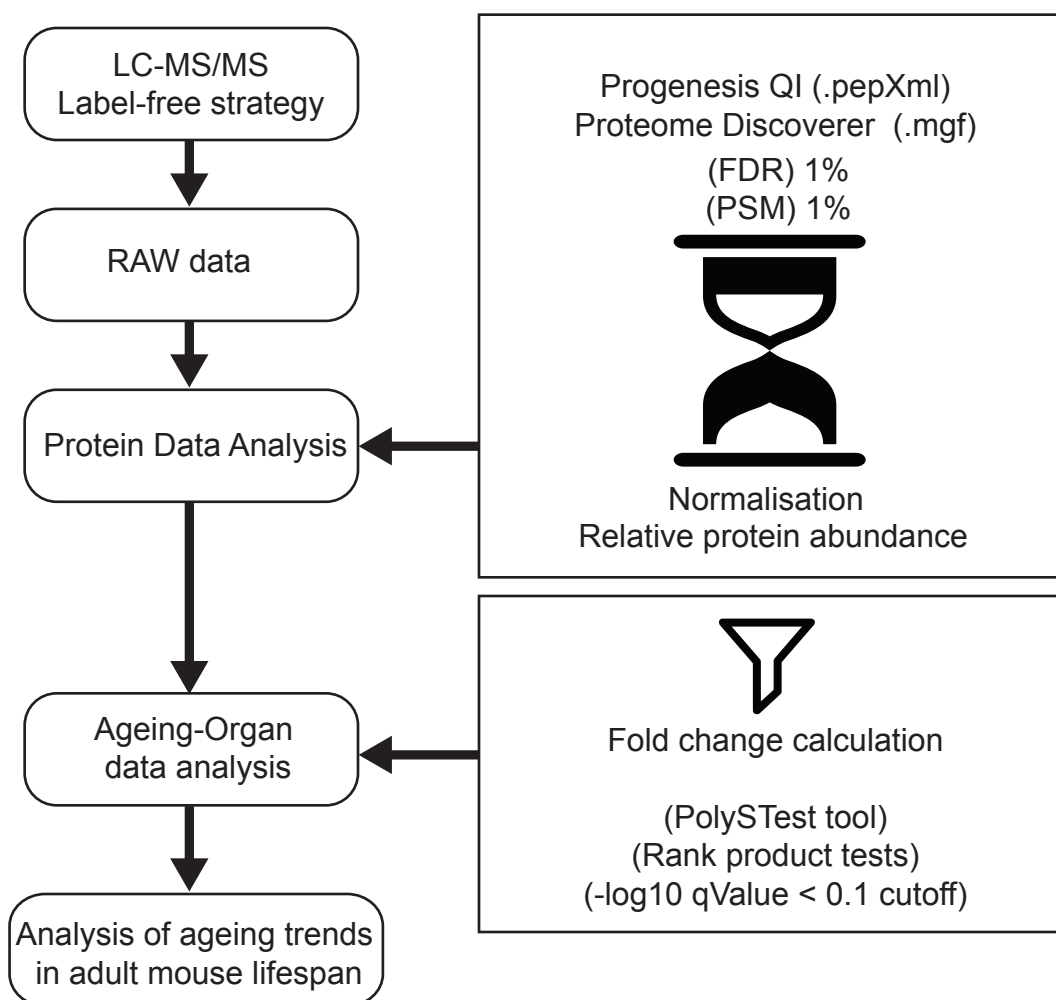**C**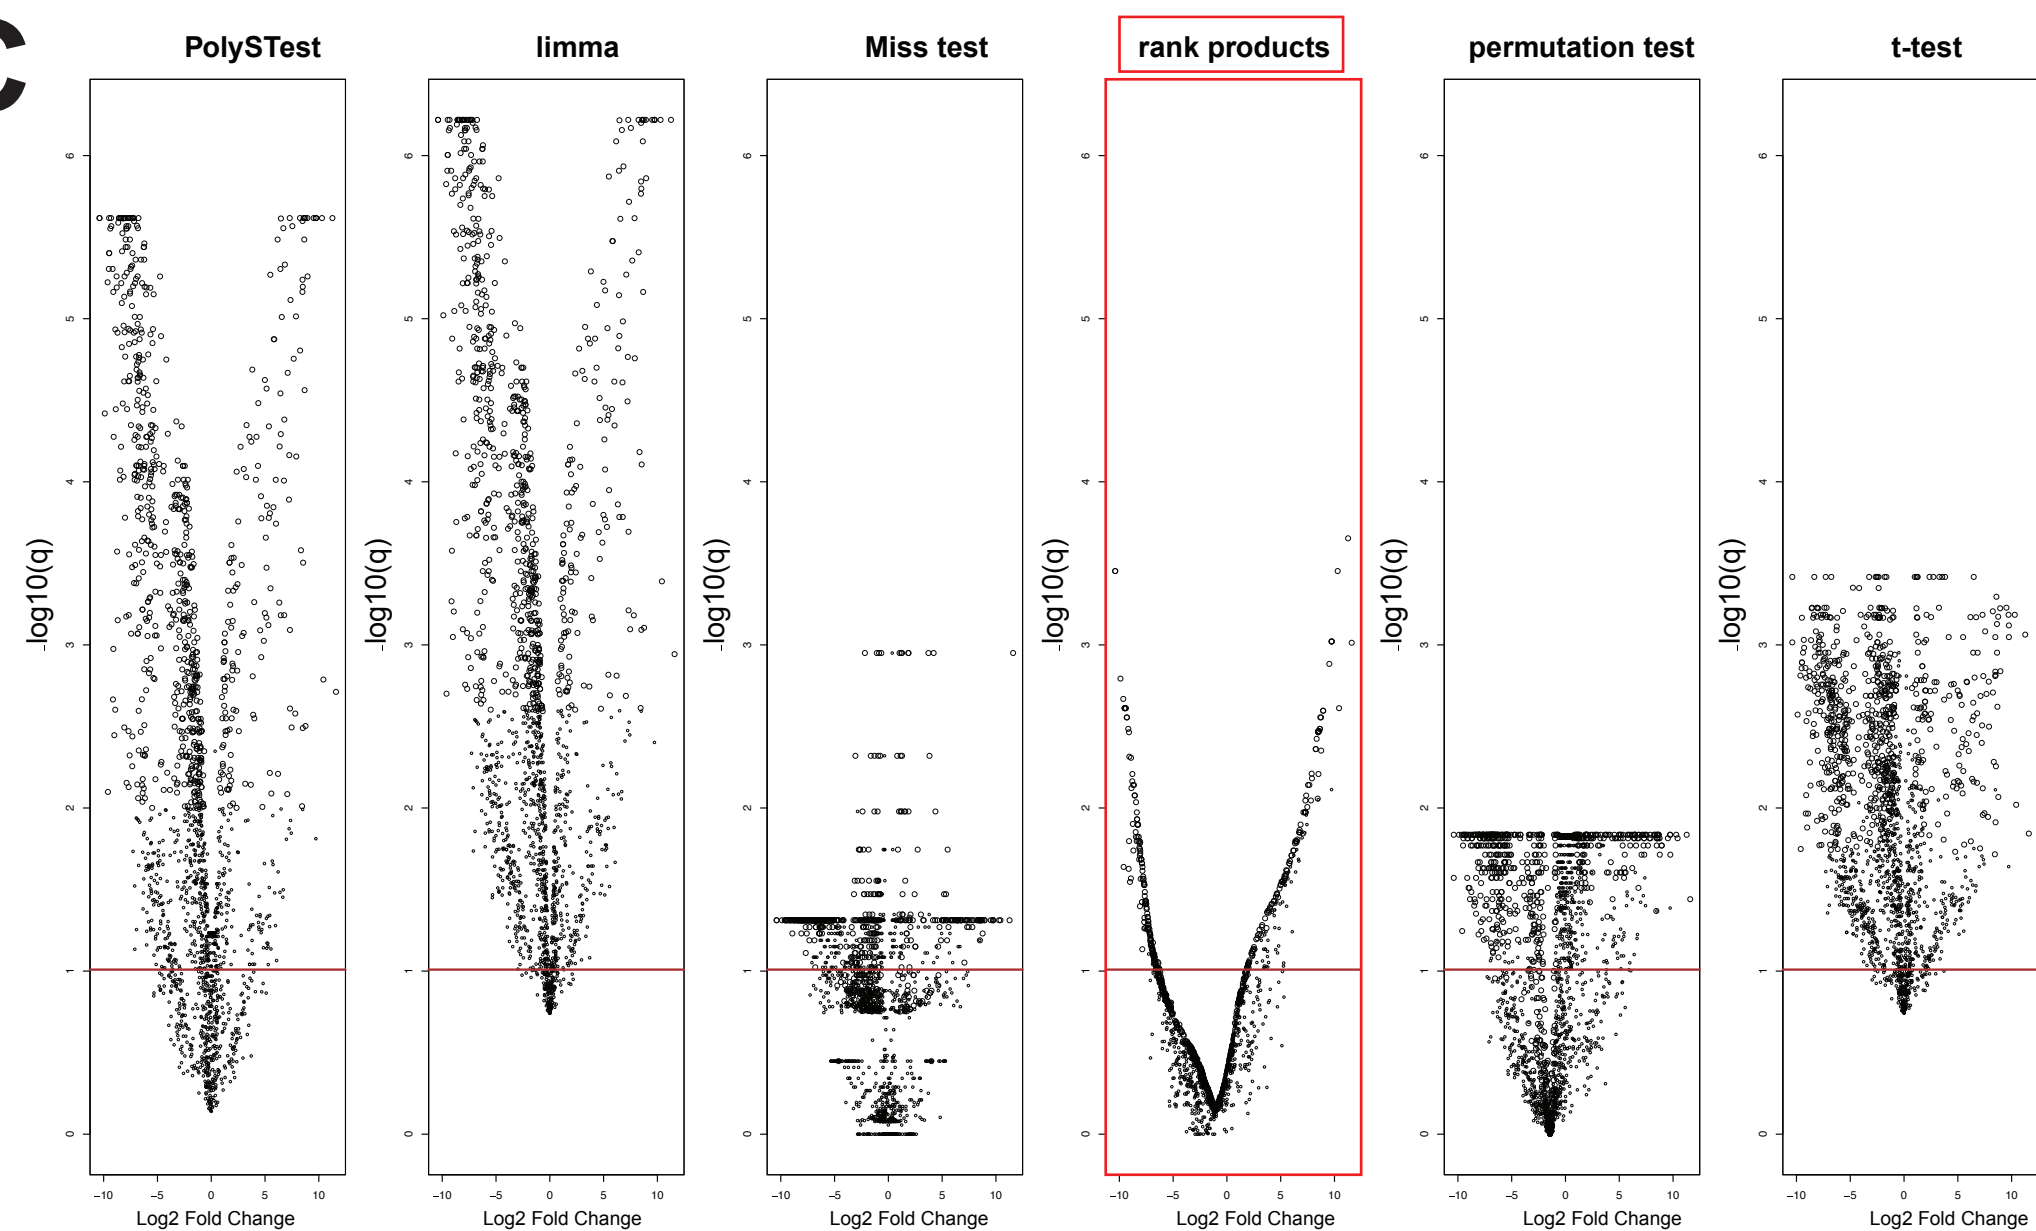**B**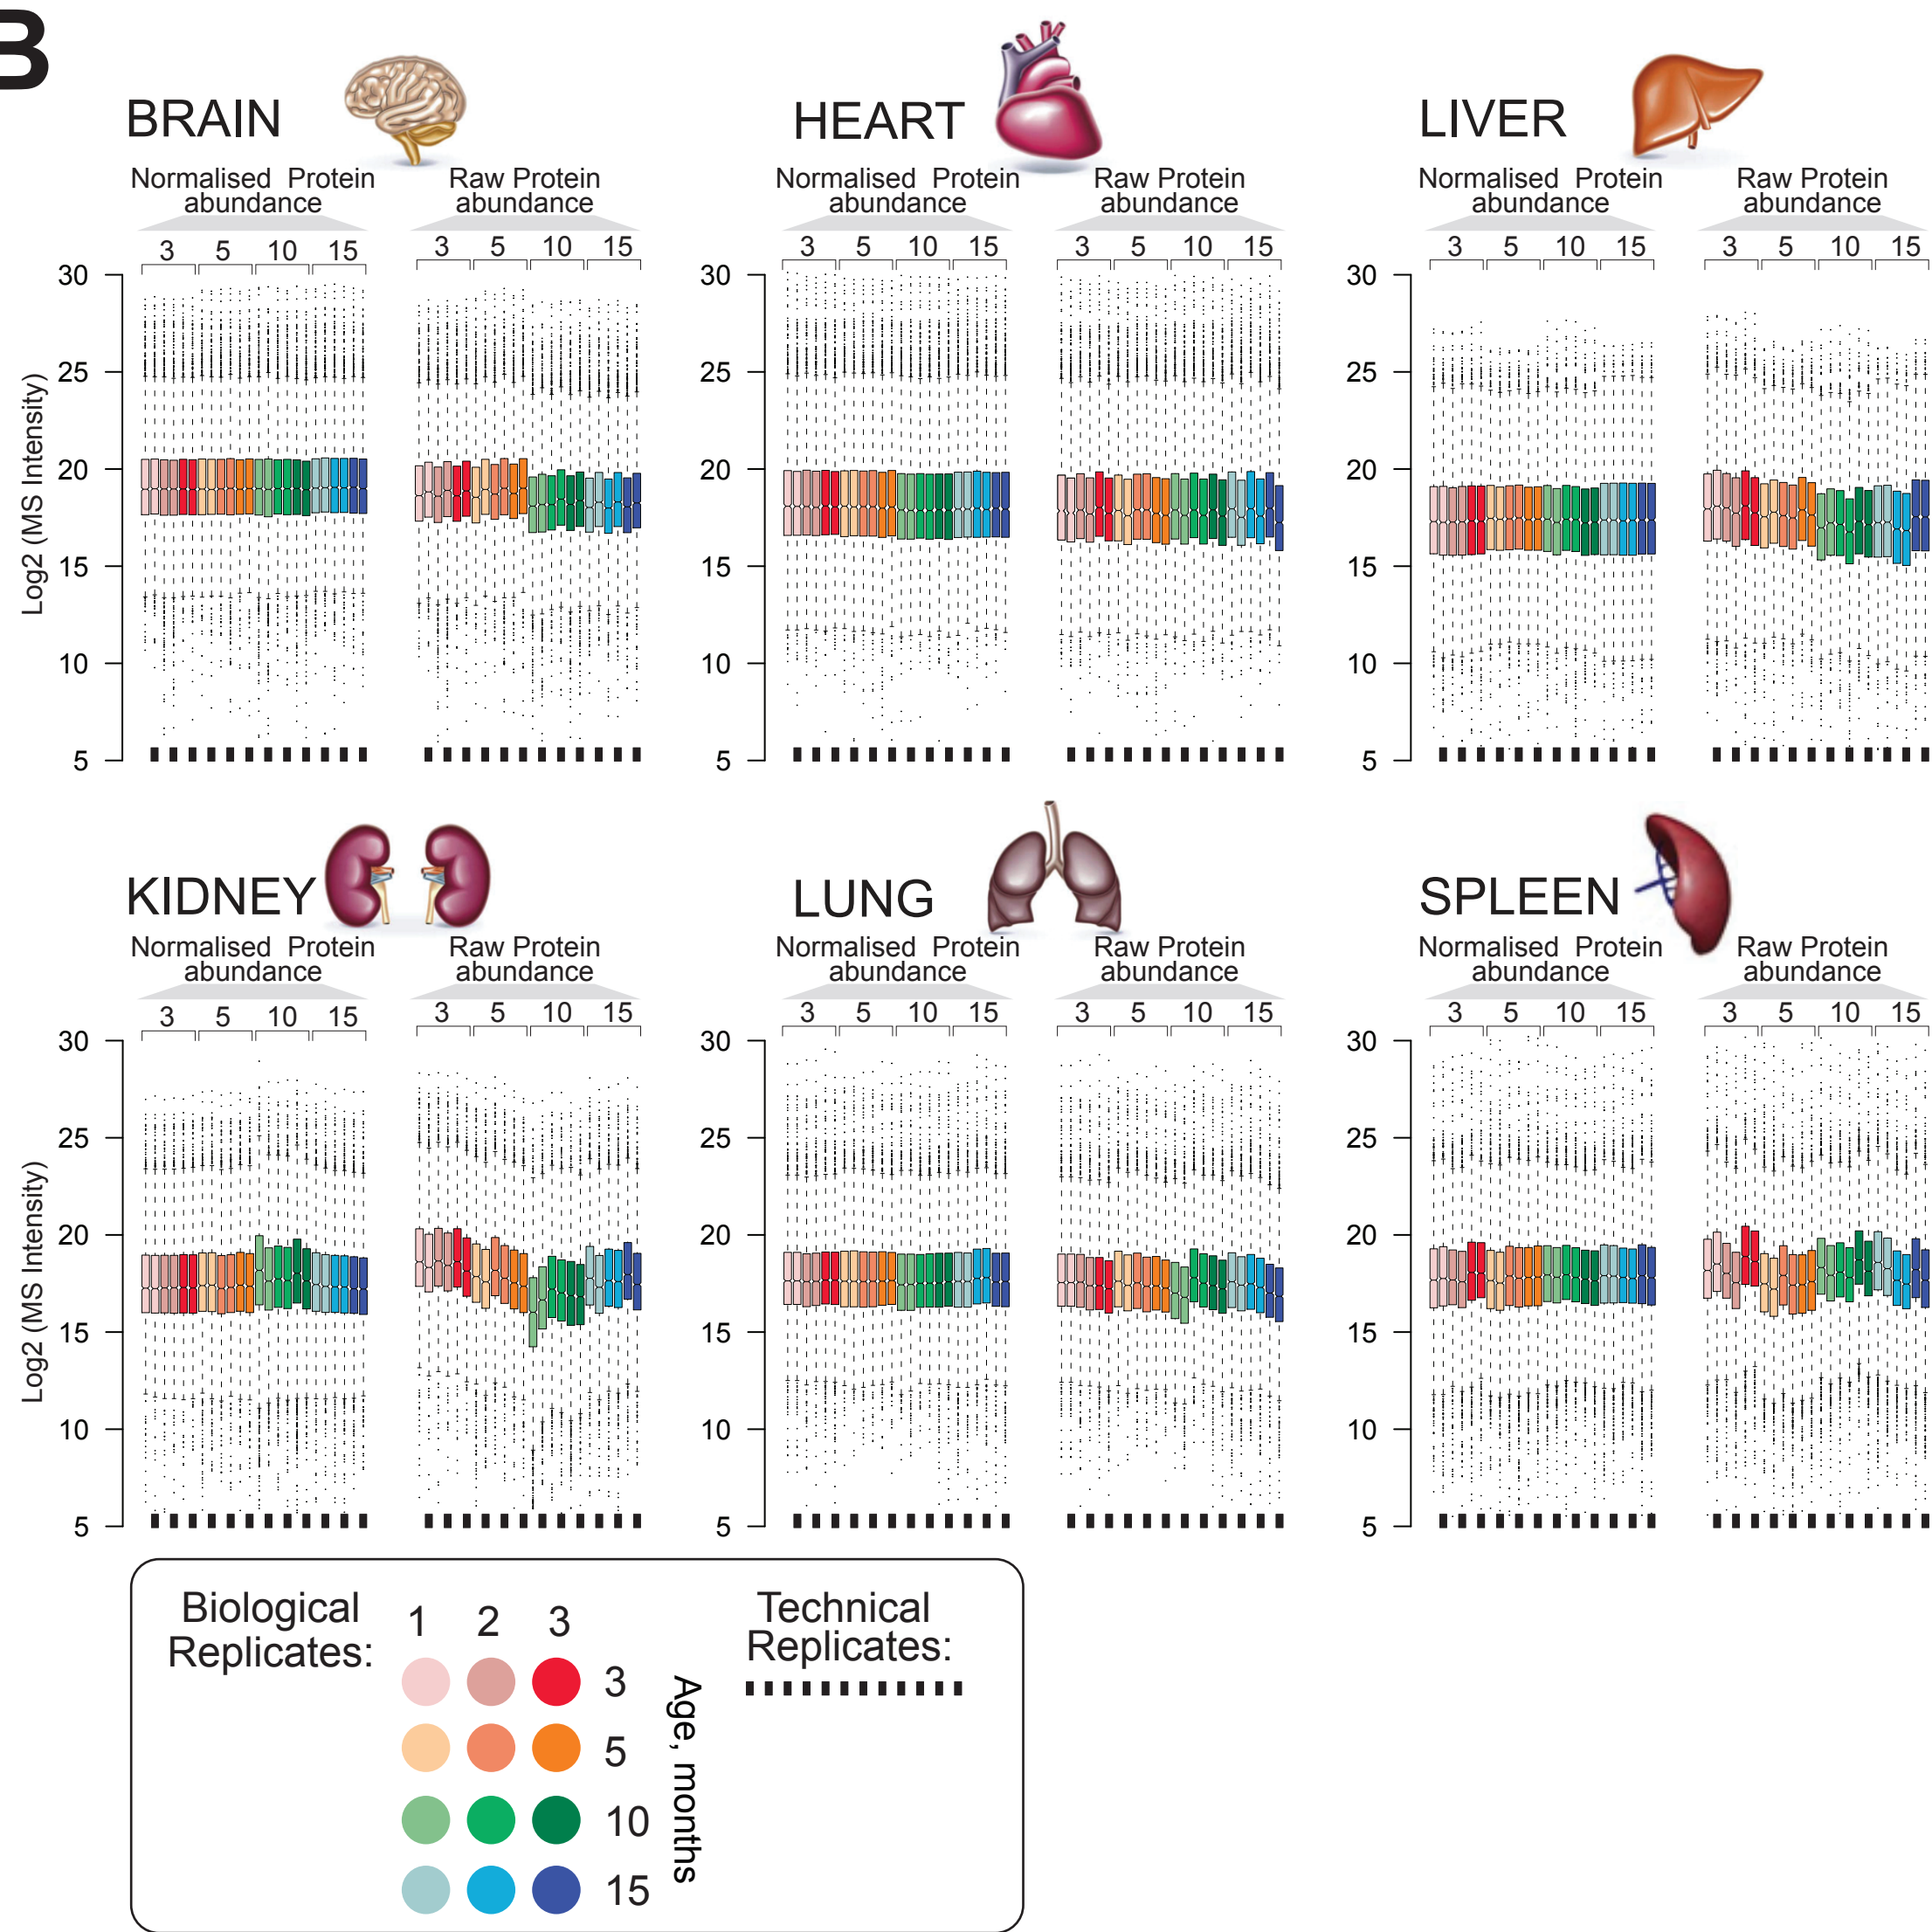

Supplement: supp [file elife-73524-supp-v1.zip › elife_poa_e73524_Figure_5_figure_supplement_1.pdf]

Unique regulated proteins

A

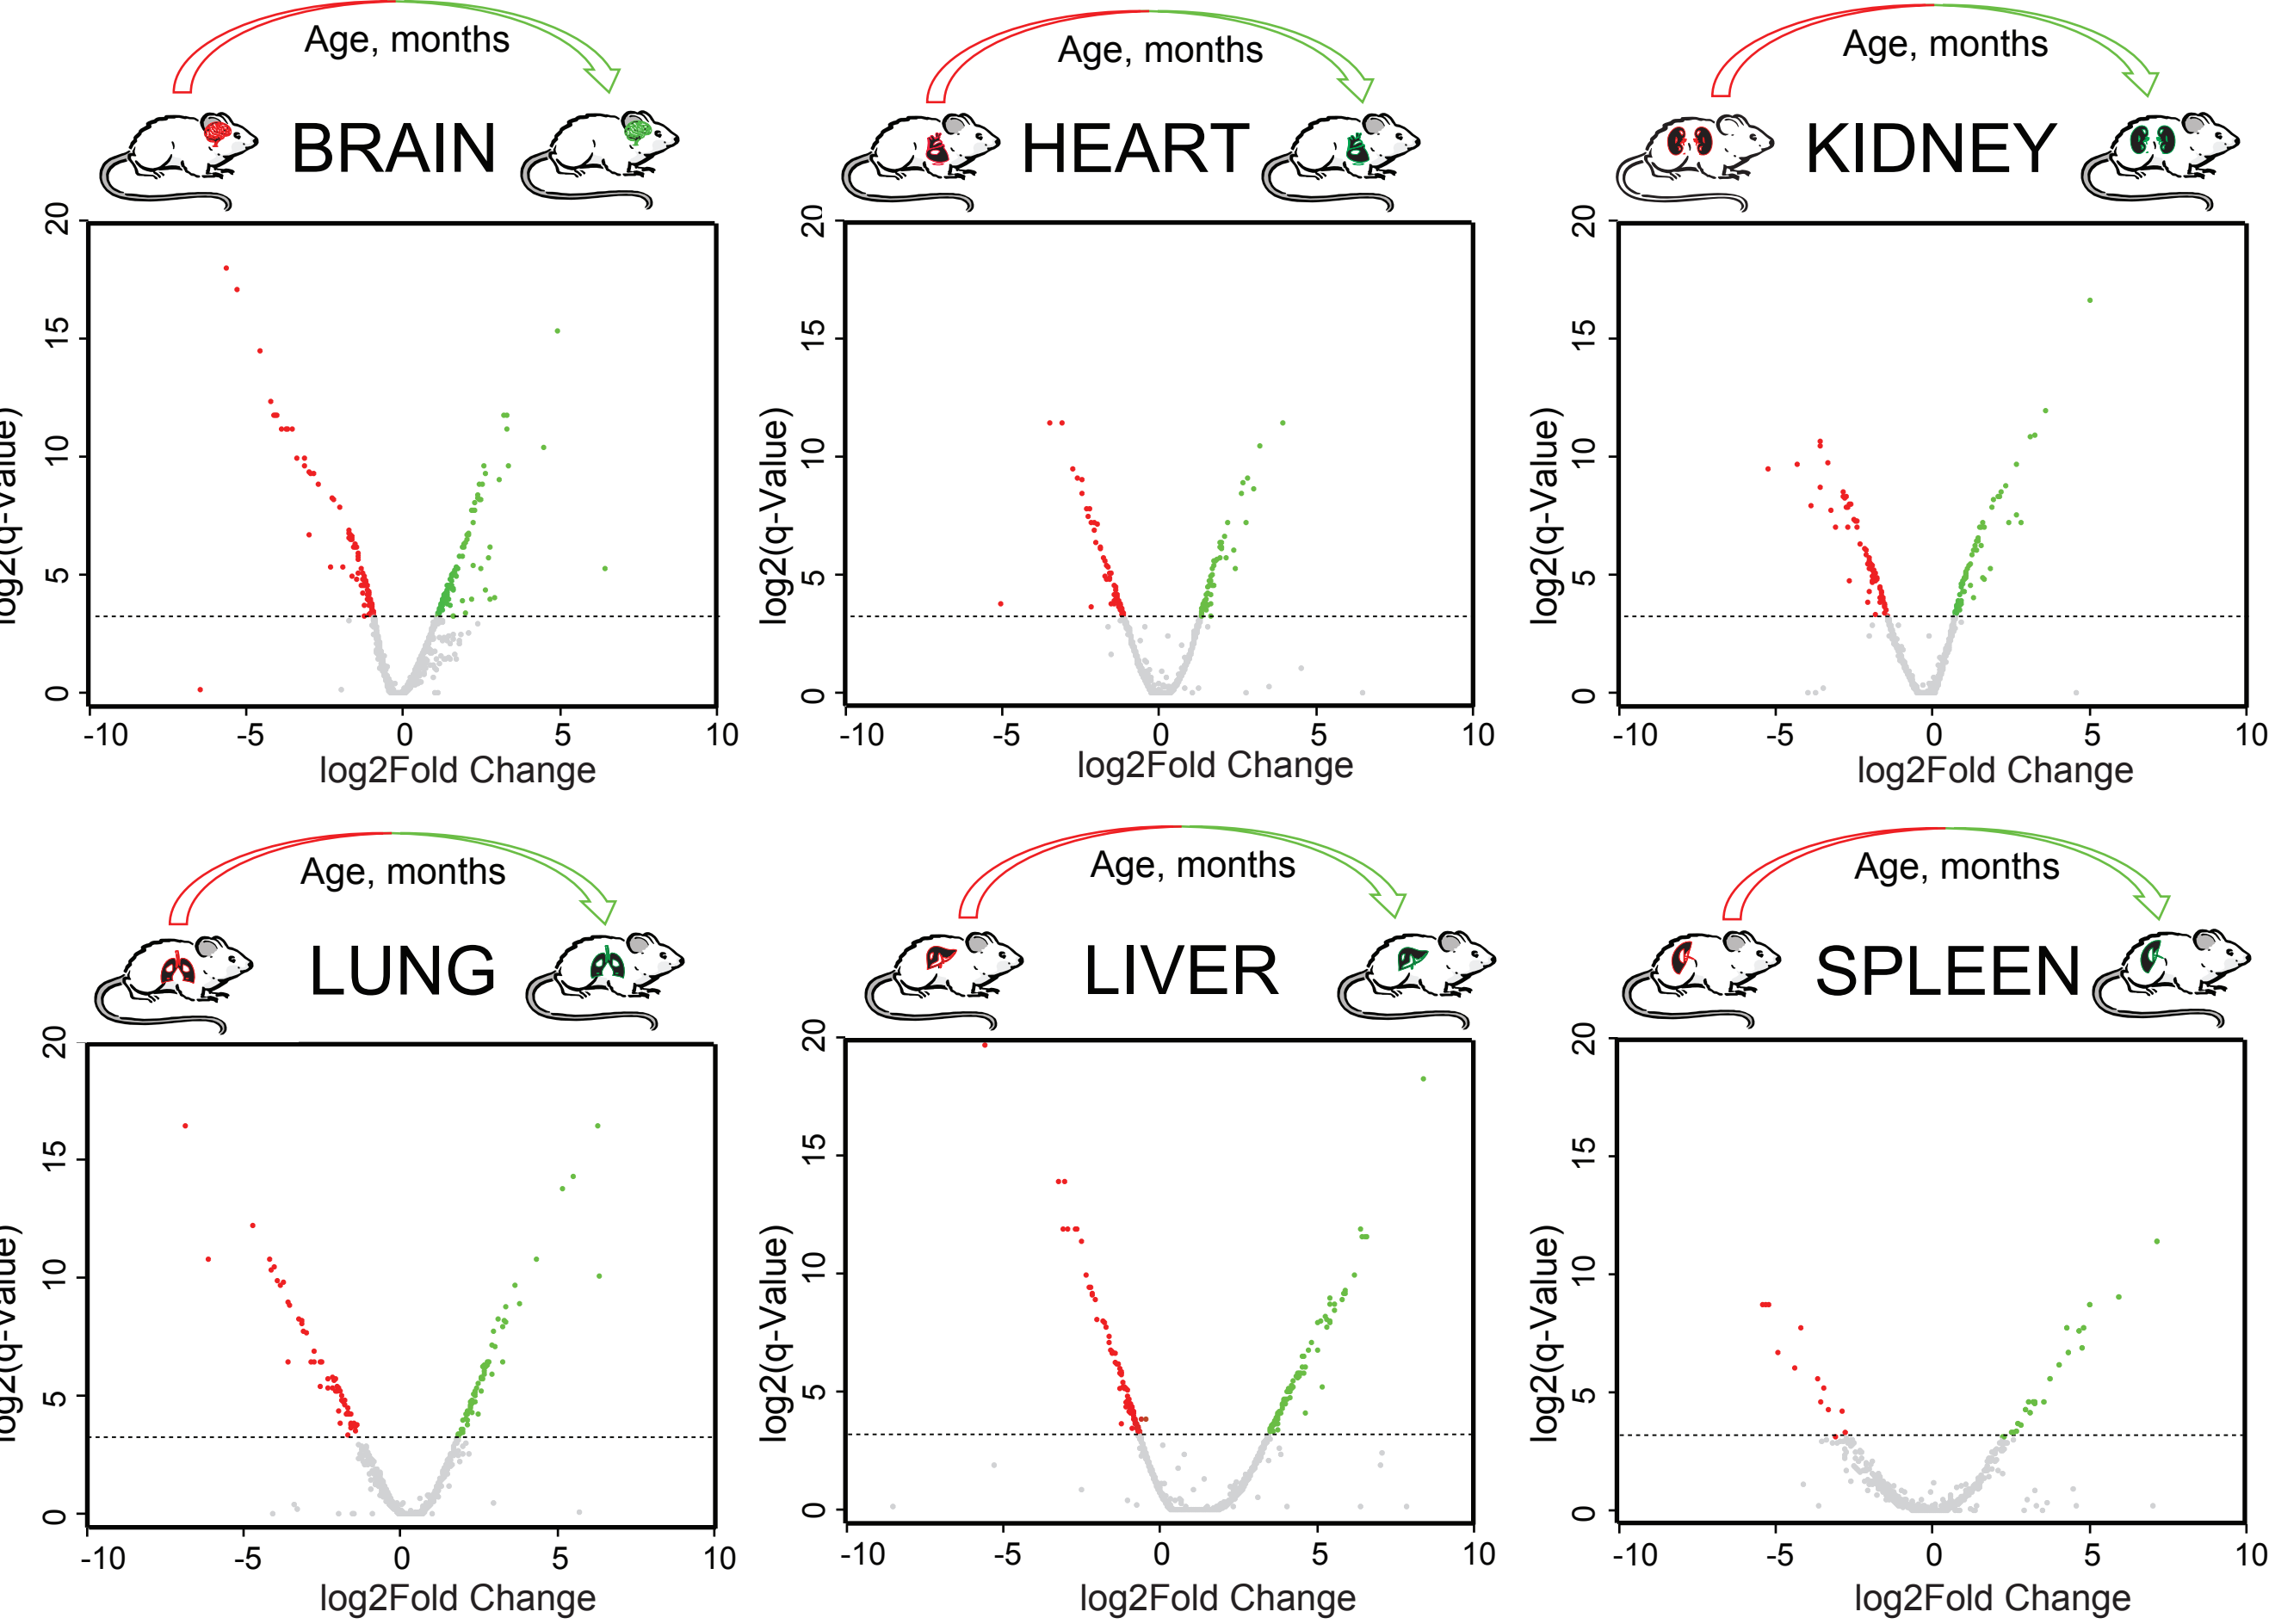

B

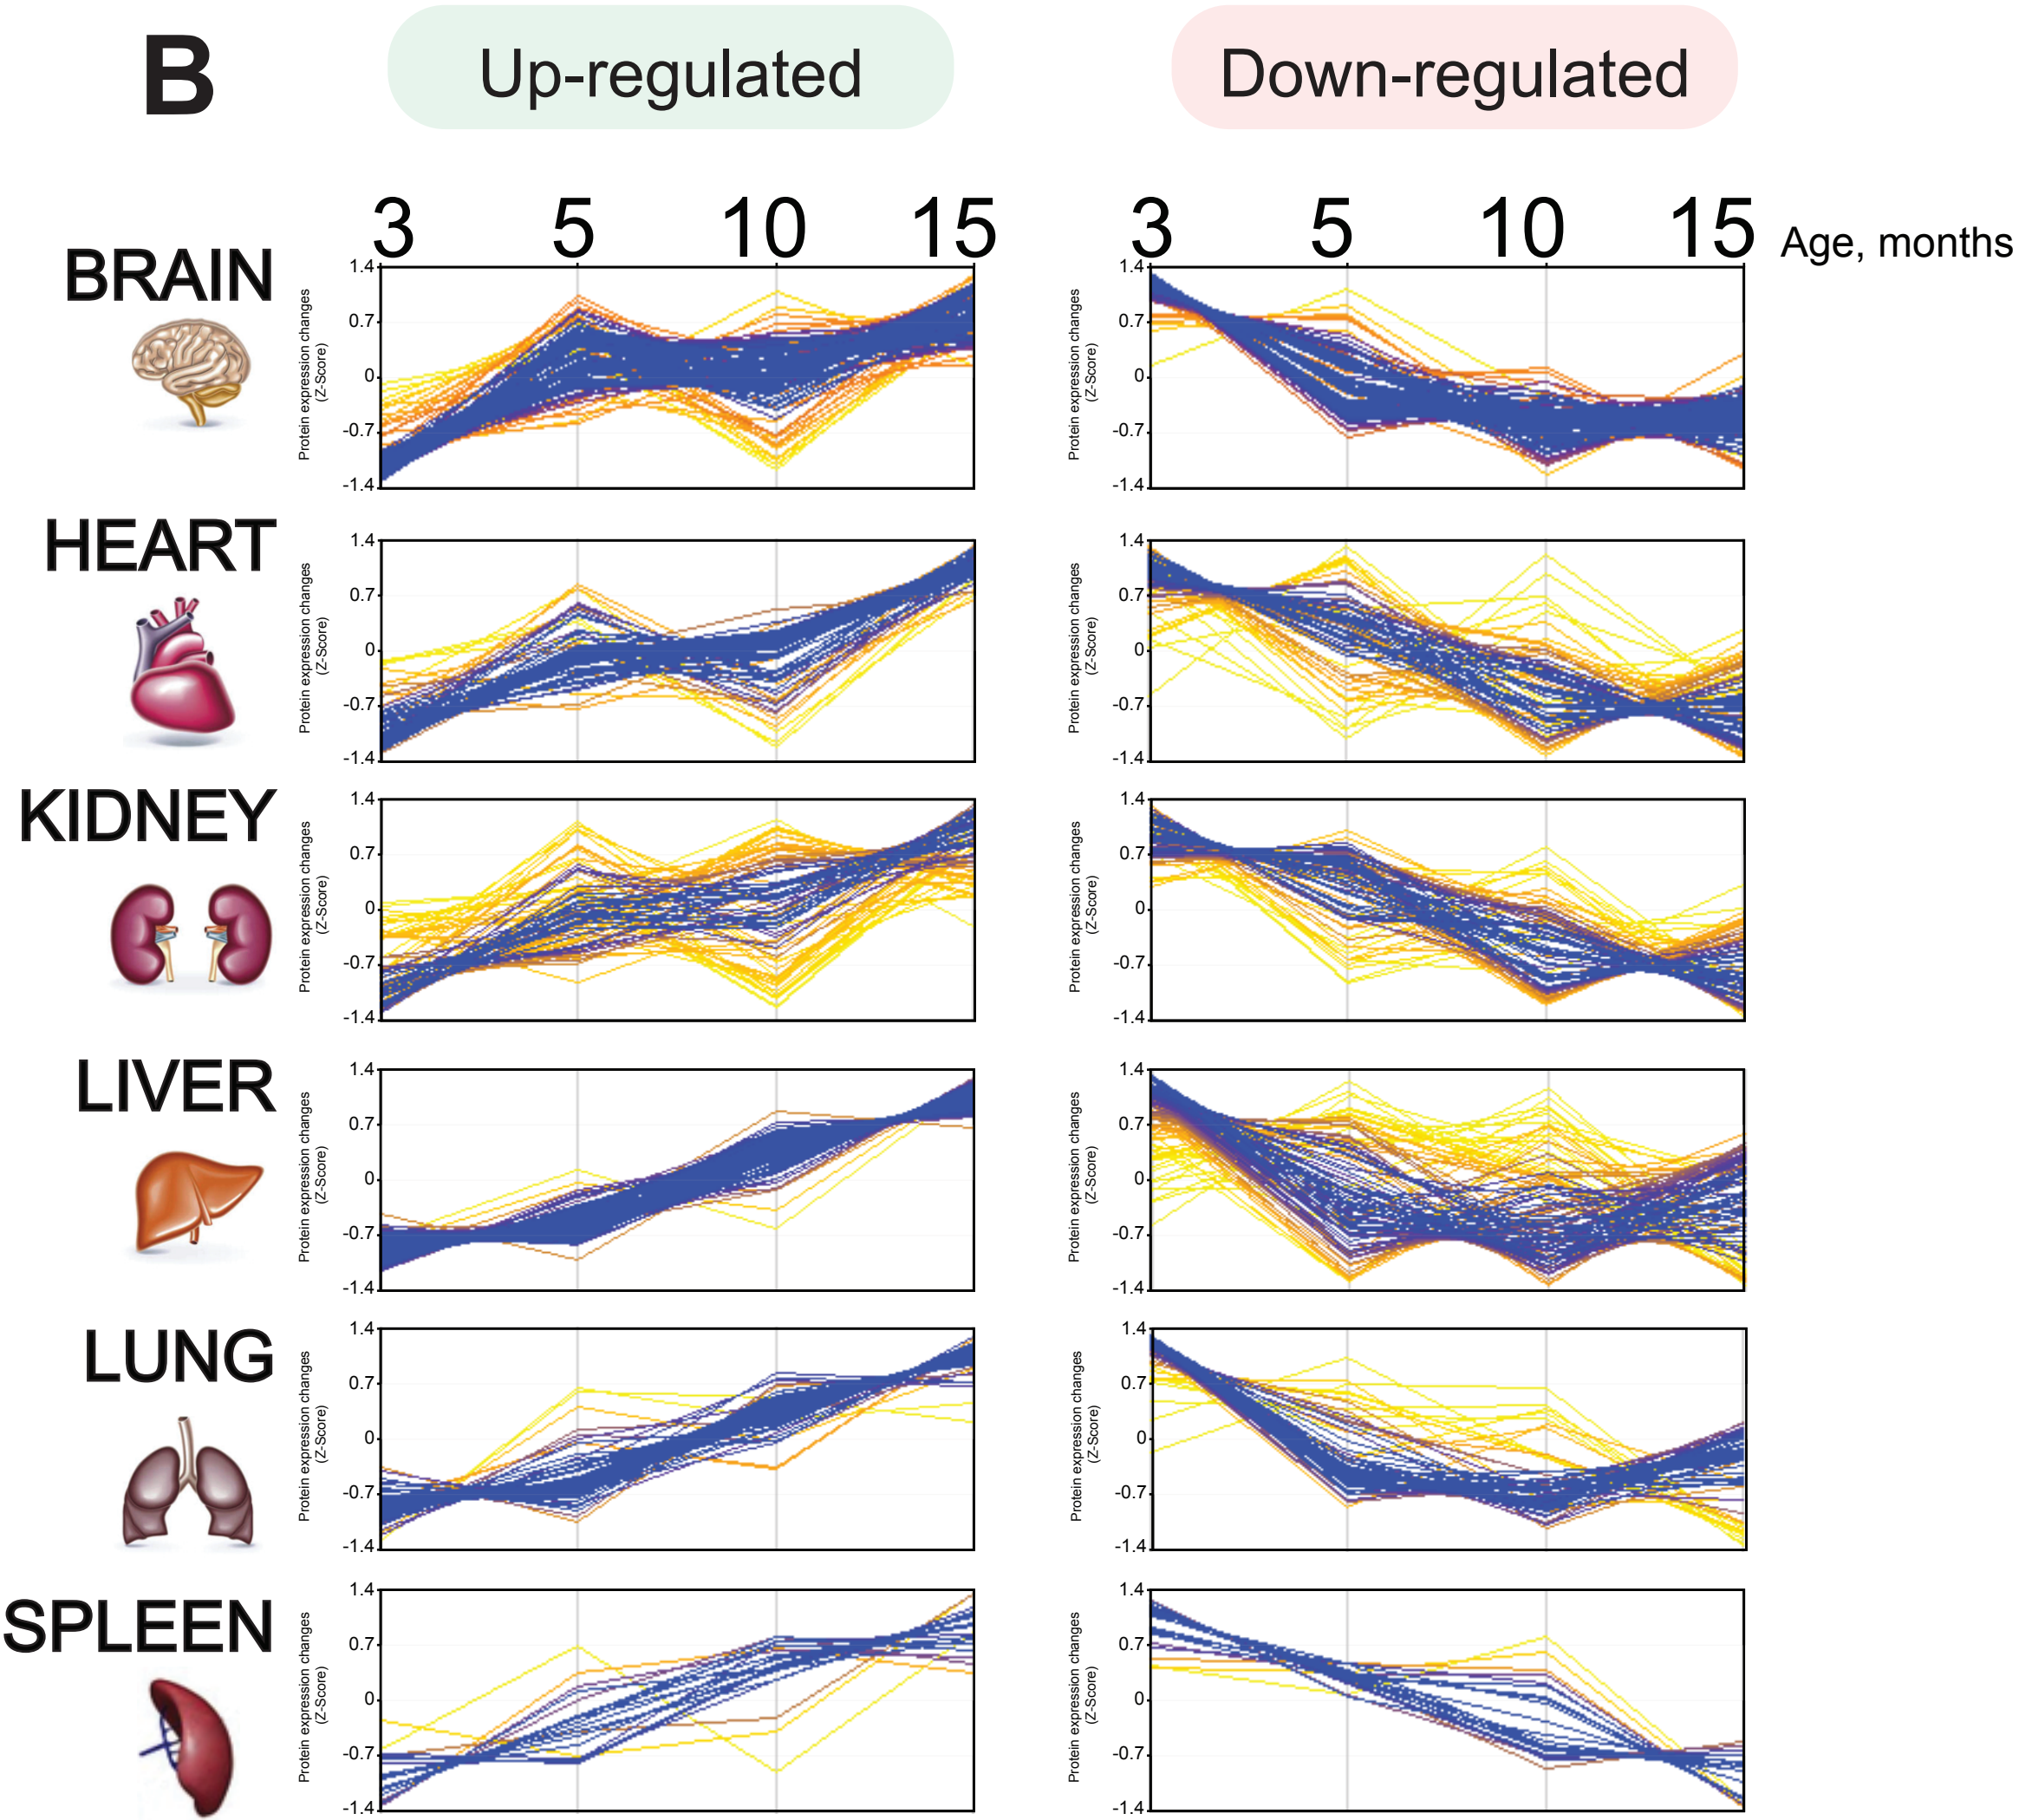

C

Human ageing-related proteins

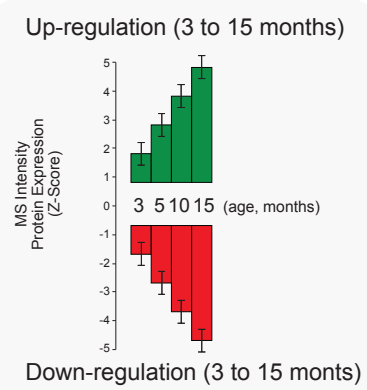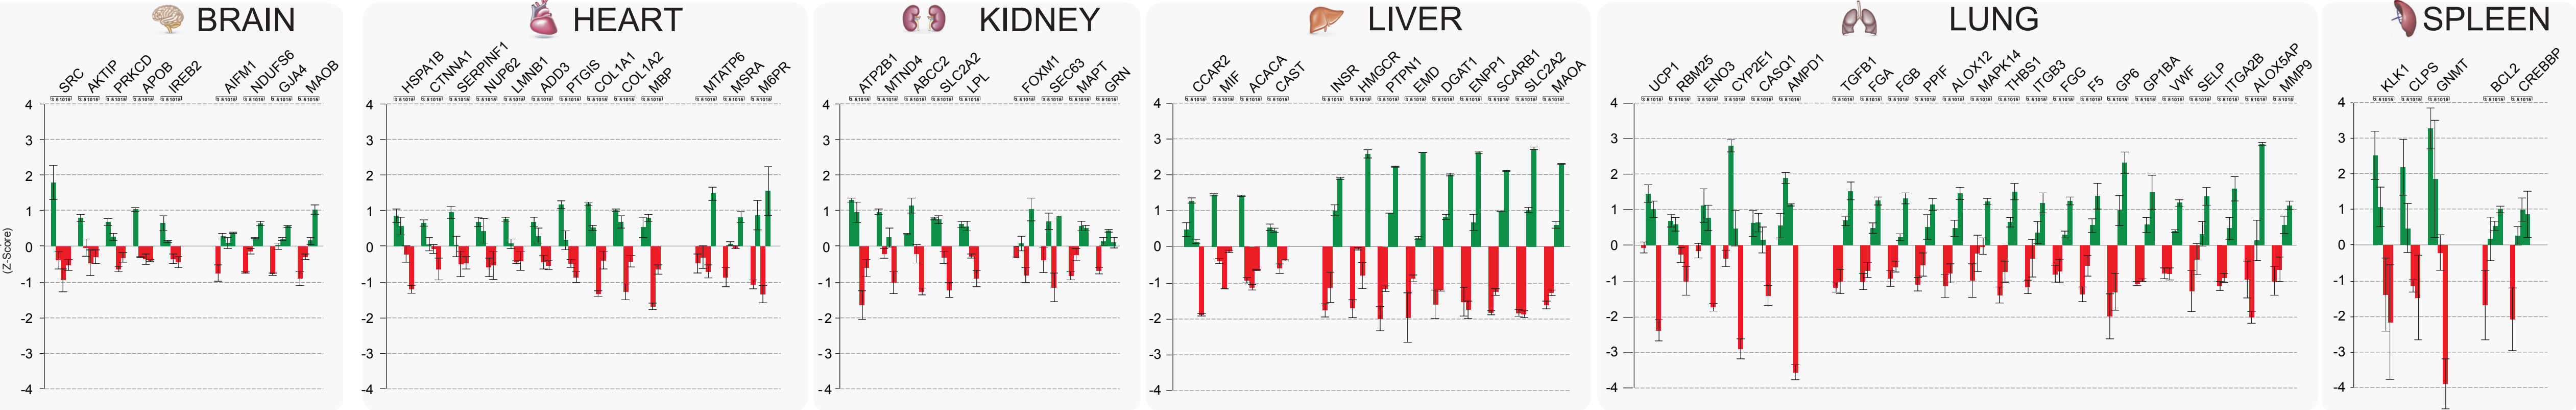

Supplement: supp [file elife-73524-supp-v1.zip › elife_poa_e73524_Figure_5_figure_supplement_2.pdf]

Figure 1-source data 1  
western blotting analysis

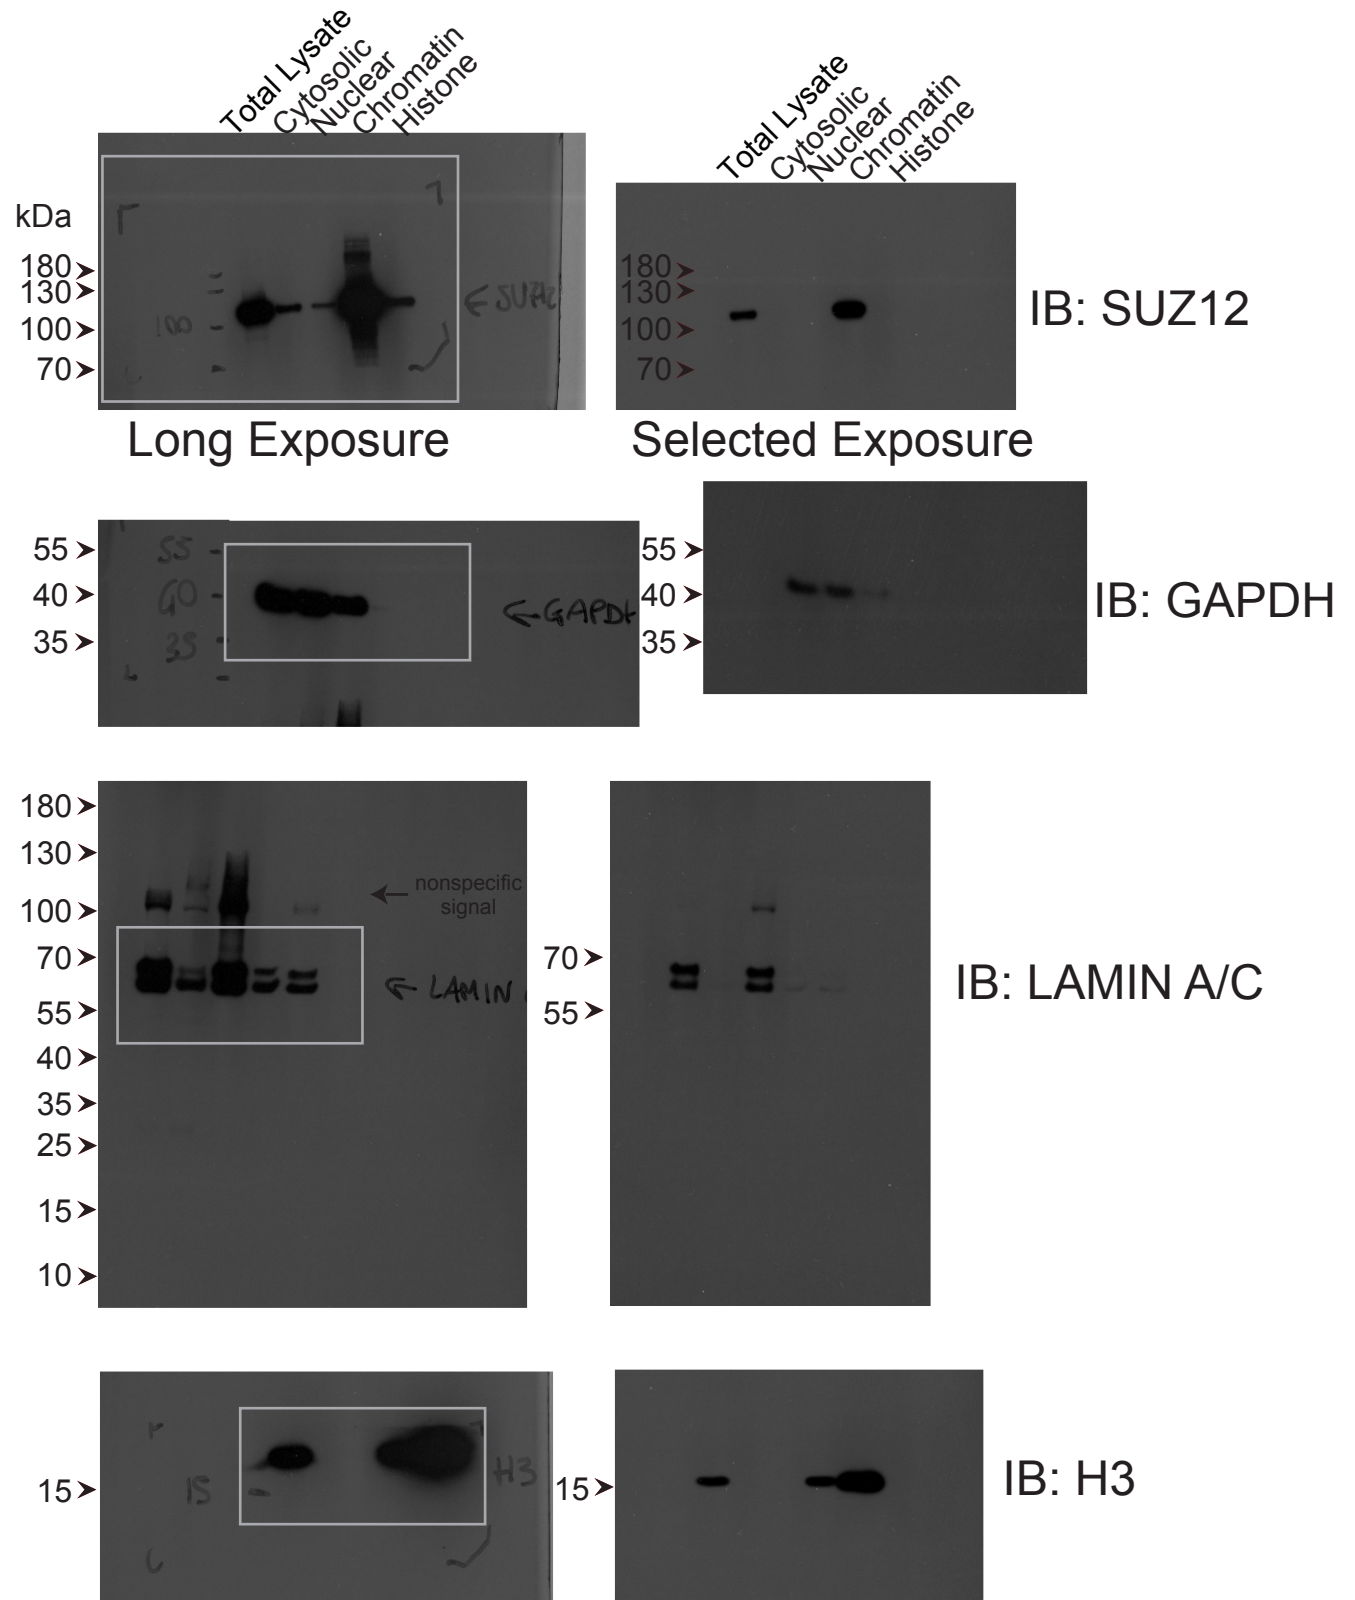

Supplement: supp [file elife-73524-supp-v1.zip › elife_poa_e73524_Figure_1_source_data_1.pdf]

Figure 2-figure supplement 1-source data 1  
western blotting analysis

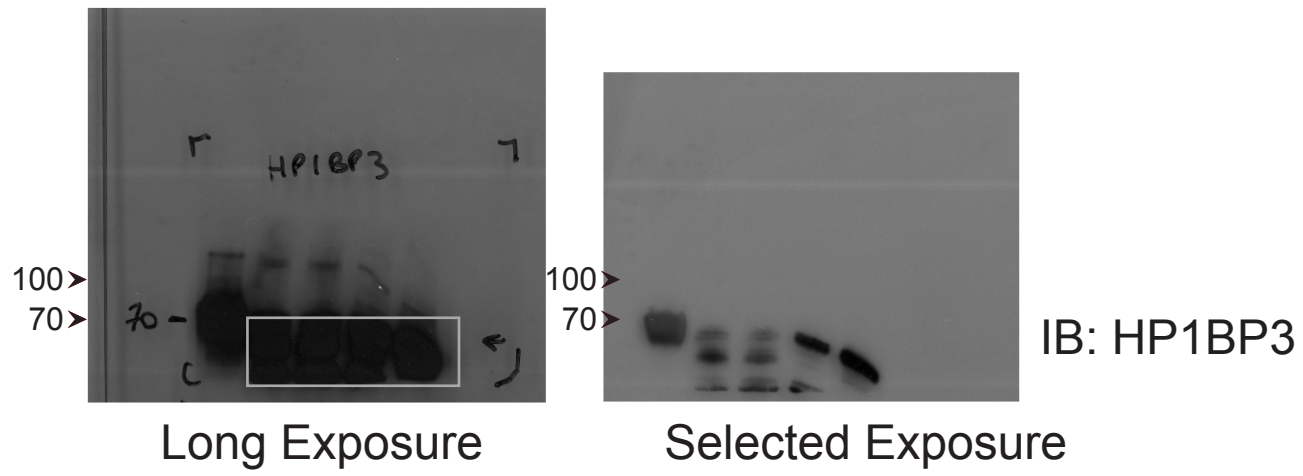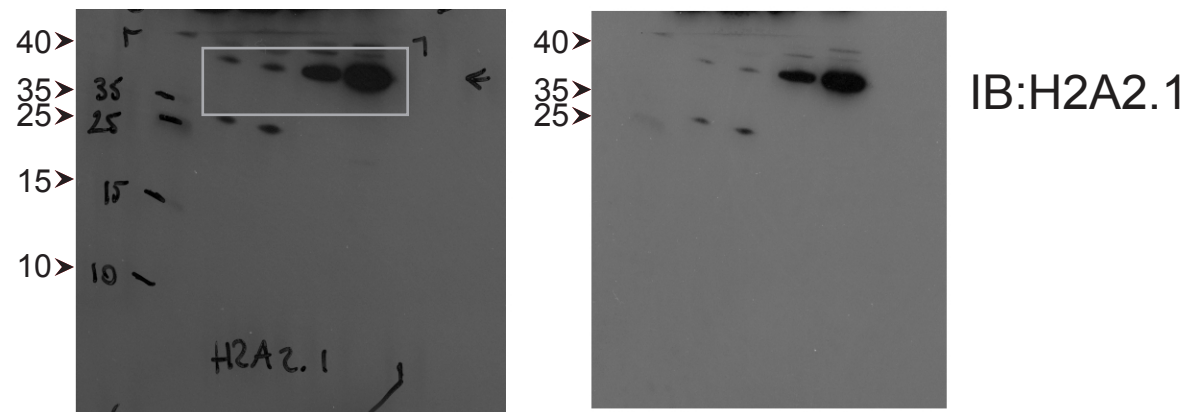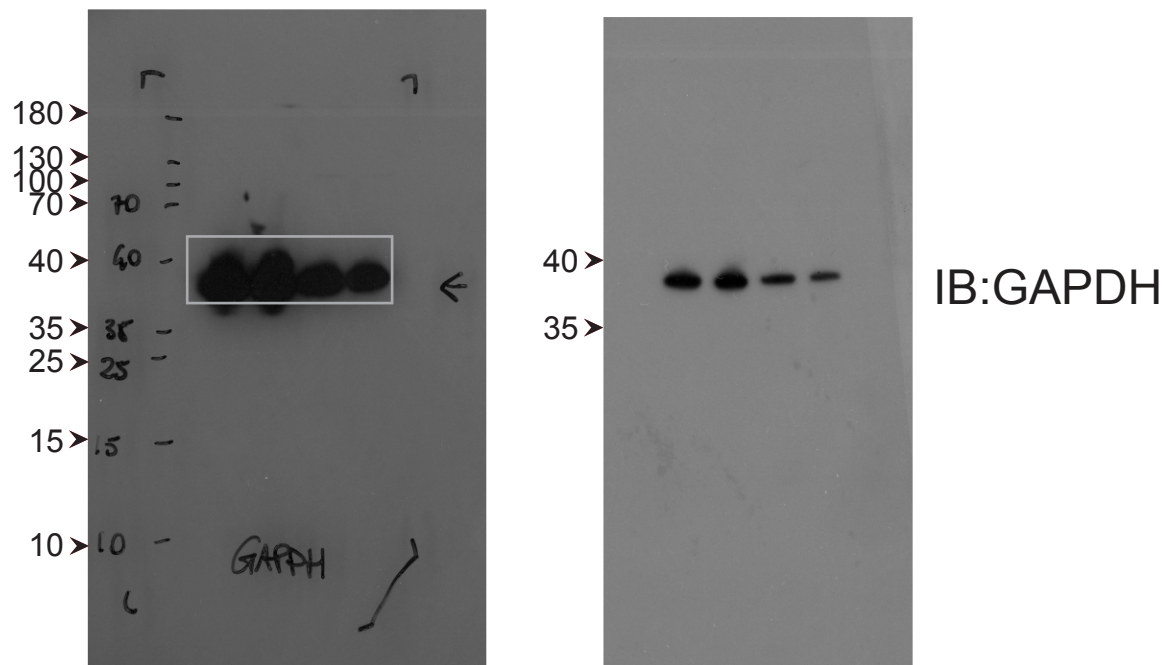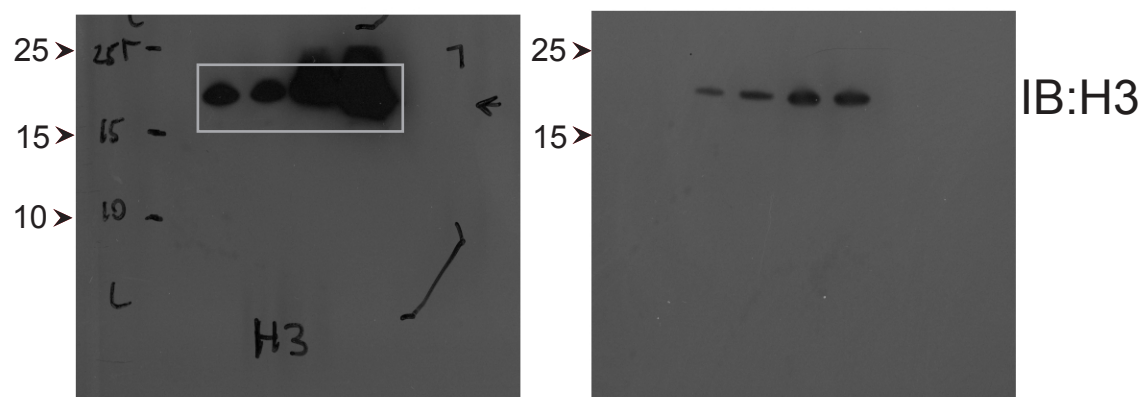

NuPAGE Gel: 4 to 12%

Supplement: supp [file elife-73524-supp-v1.zip › elife_poa_e73524_Figure_1_figure_supplement_2_source_data_1.pdf]

Figure 7 - source data 1- BRAIN

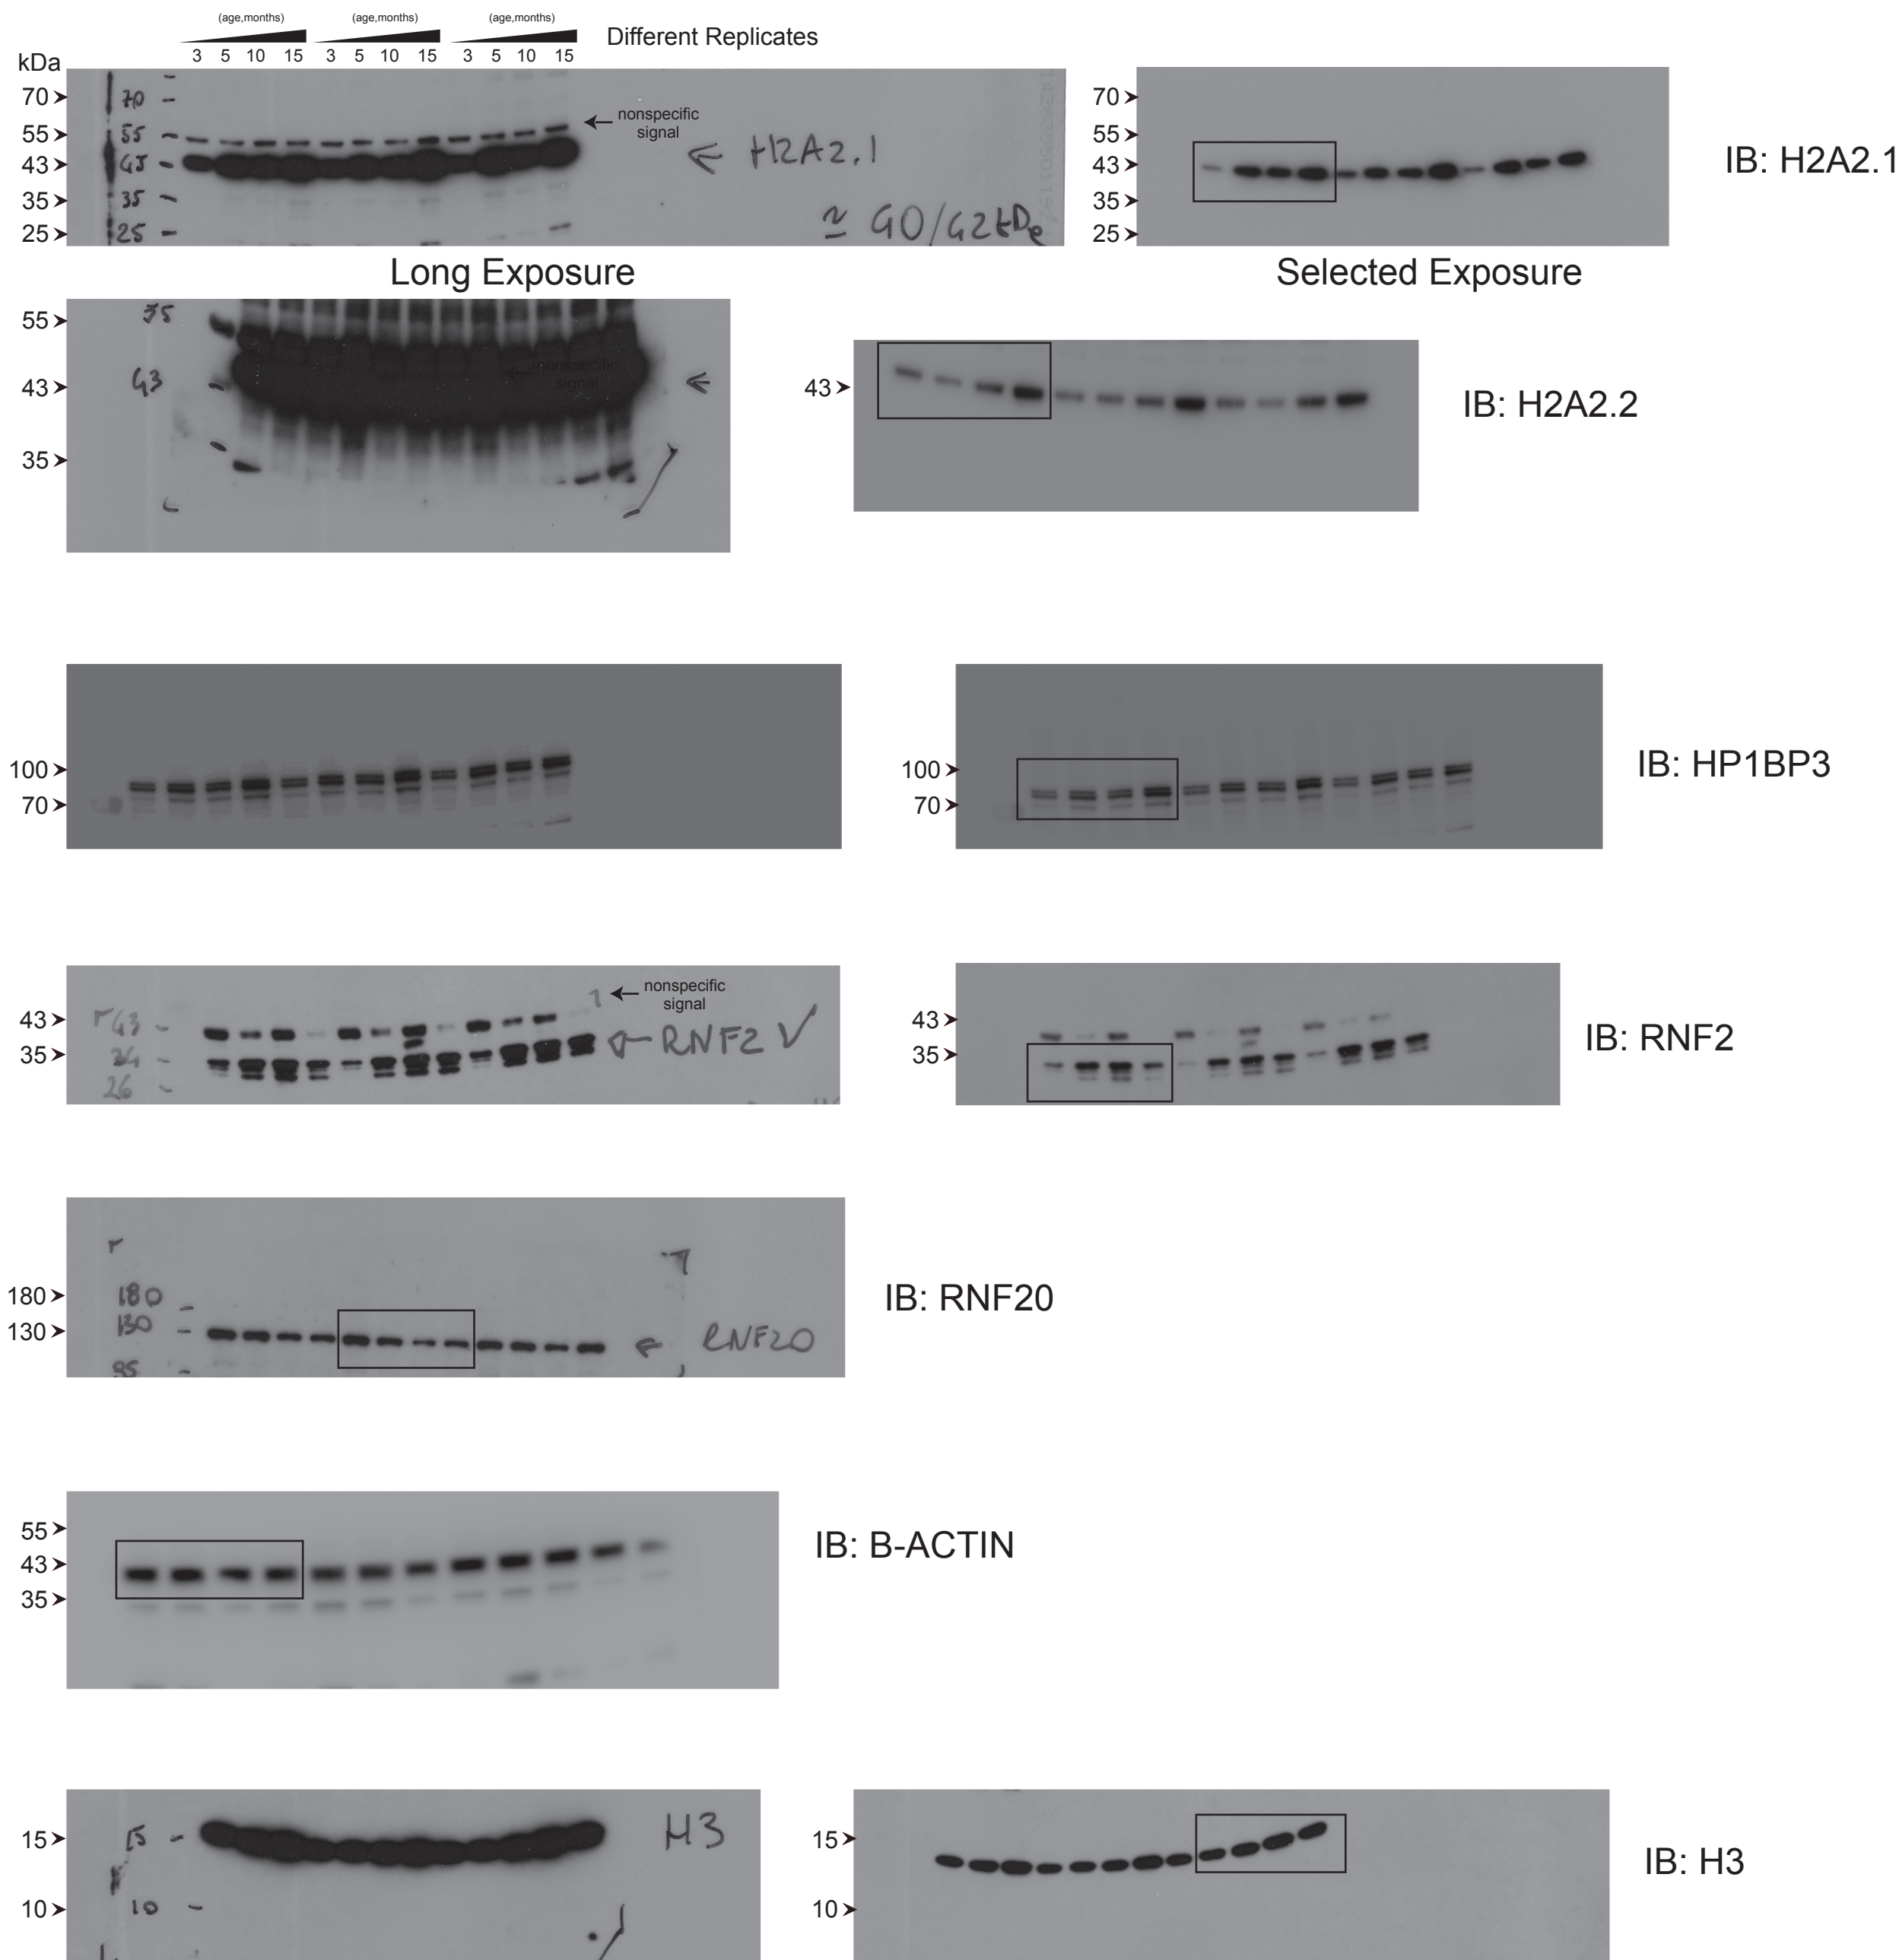

NuPAGE Gel: 4 to 12%

Supplement: supp [file elife-73524-supp-v1.zip › elife_poa_e73524_Figure_7_source_data_1.pdf]

Figure 7- source data 2- HEART

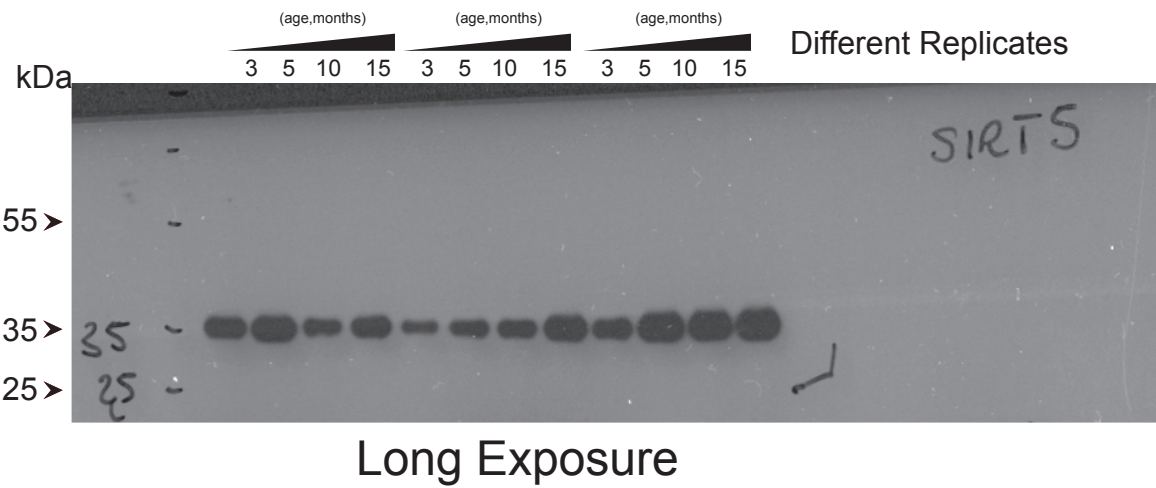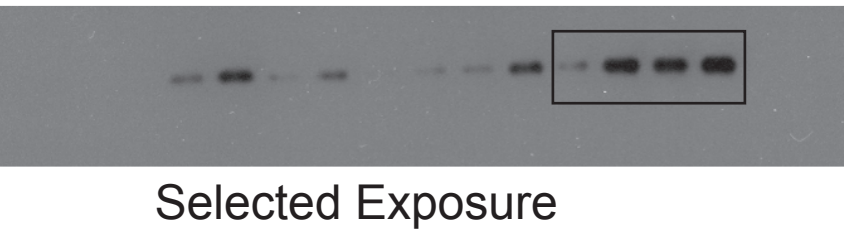

IB: SIRT5

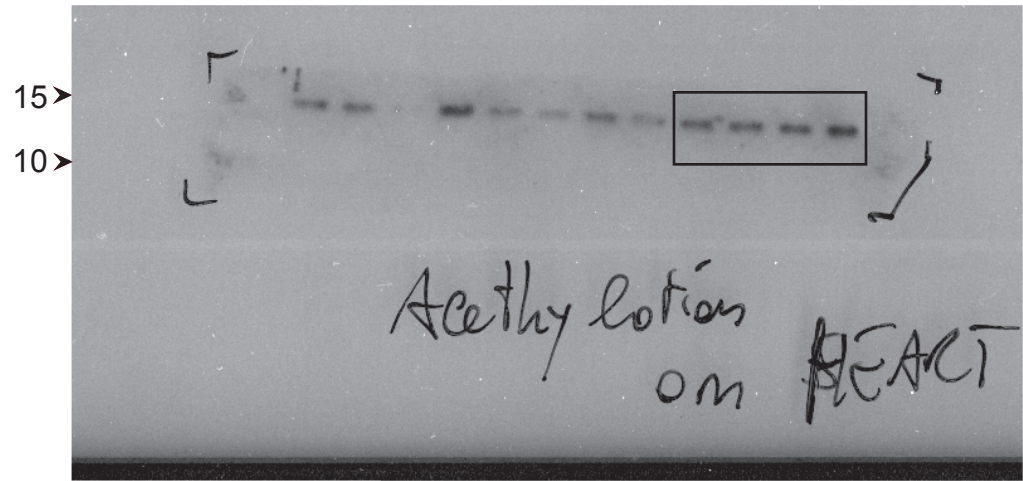

IB:Ac-H3

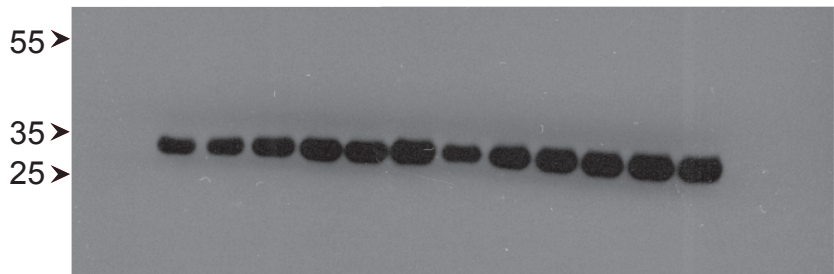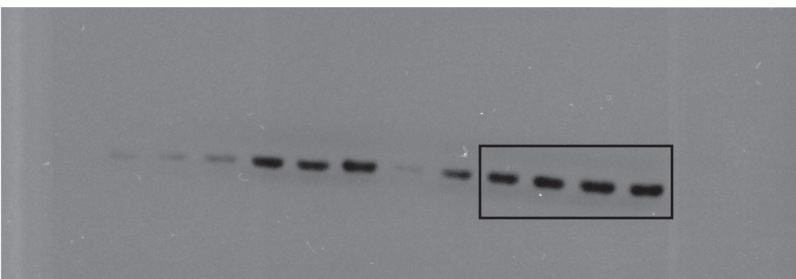

IB: SIRT3

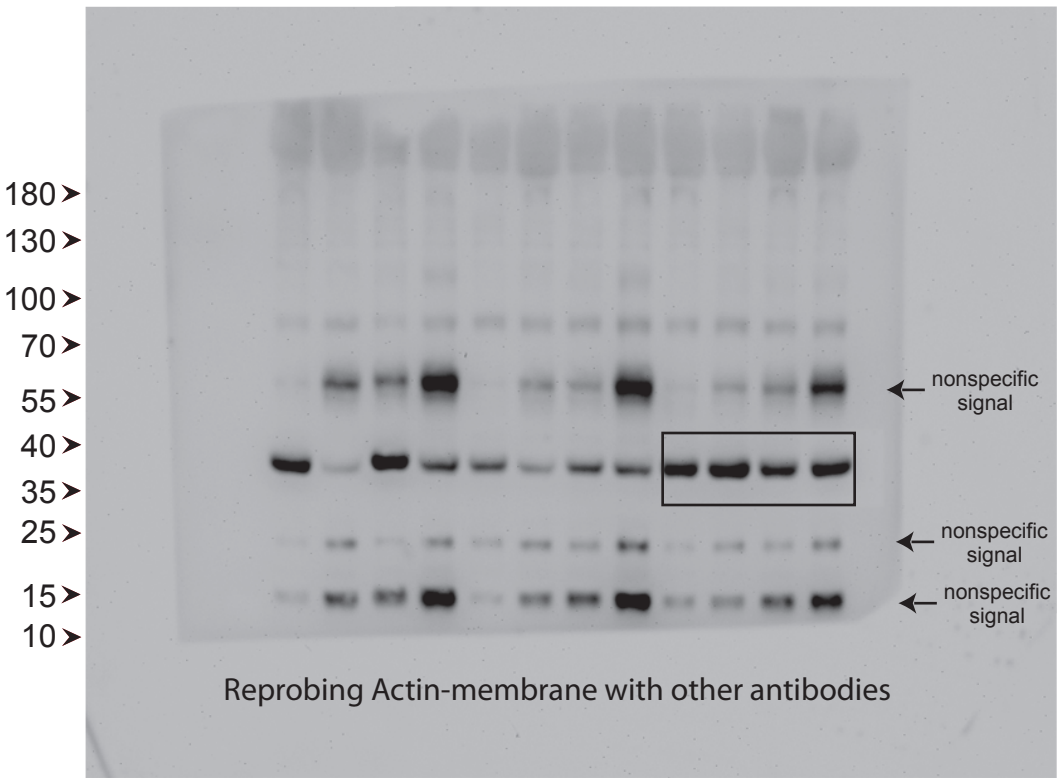

IB: B-ACTIN

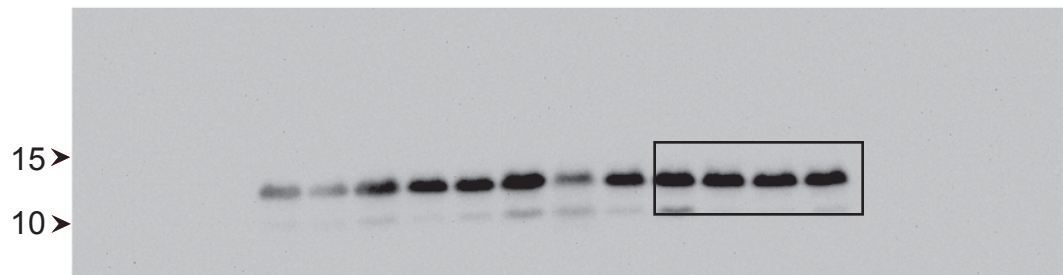

IB: H3

NuPAGE Gel: 4 to 12%

Supplement: supp [file elife-73524-supp-v1.zip › elife_poa_e73524_Figure_7_source_data_2.pdf]

Figure 7 - source data 3 -KIDNEY  
western blotting analysis

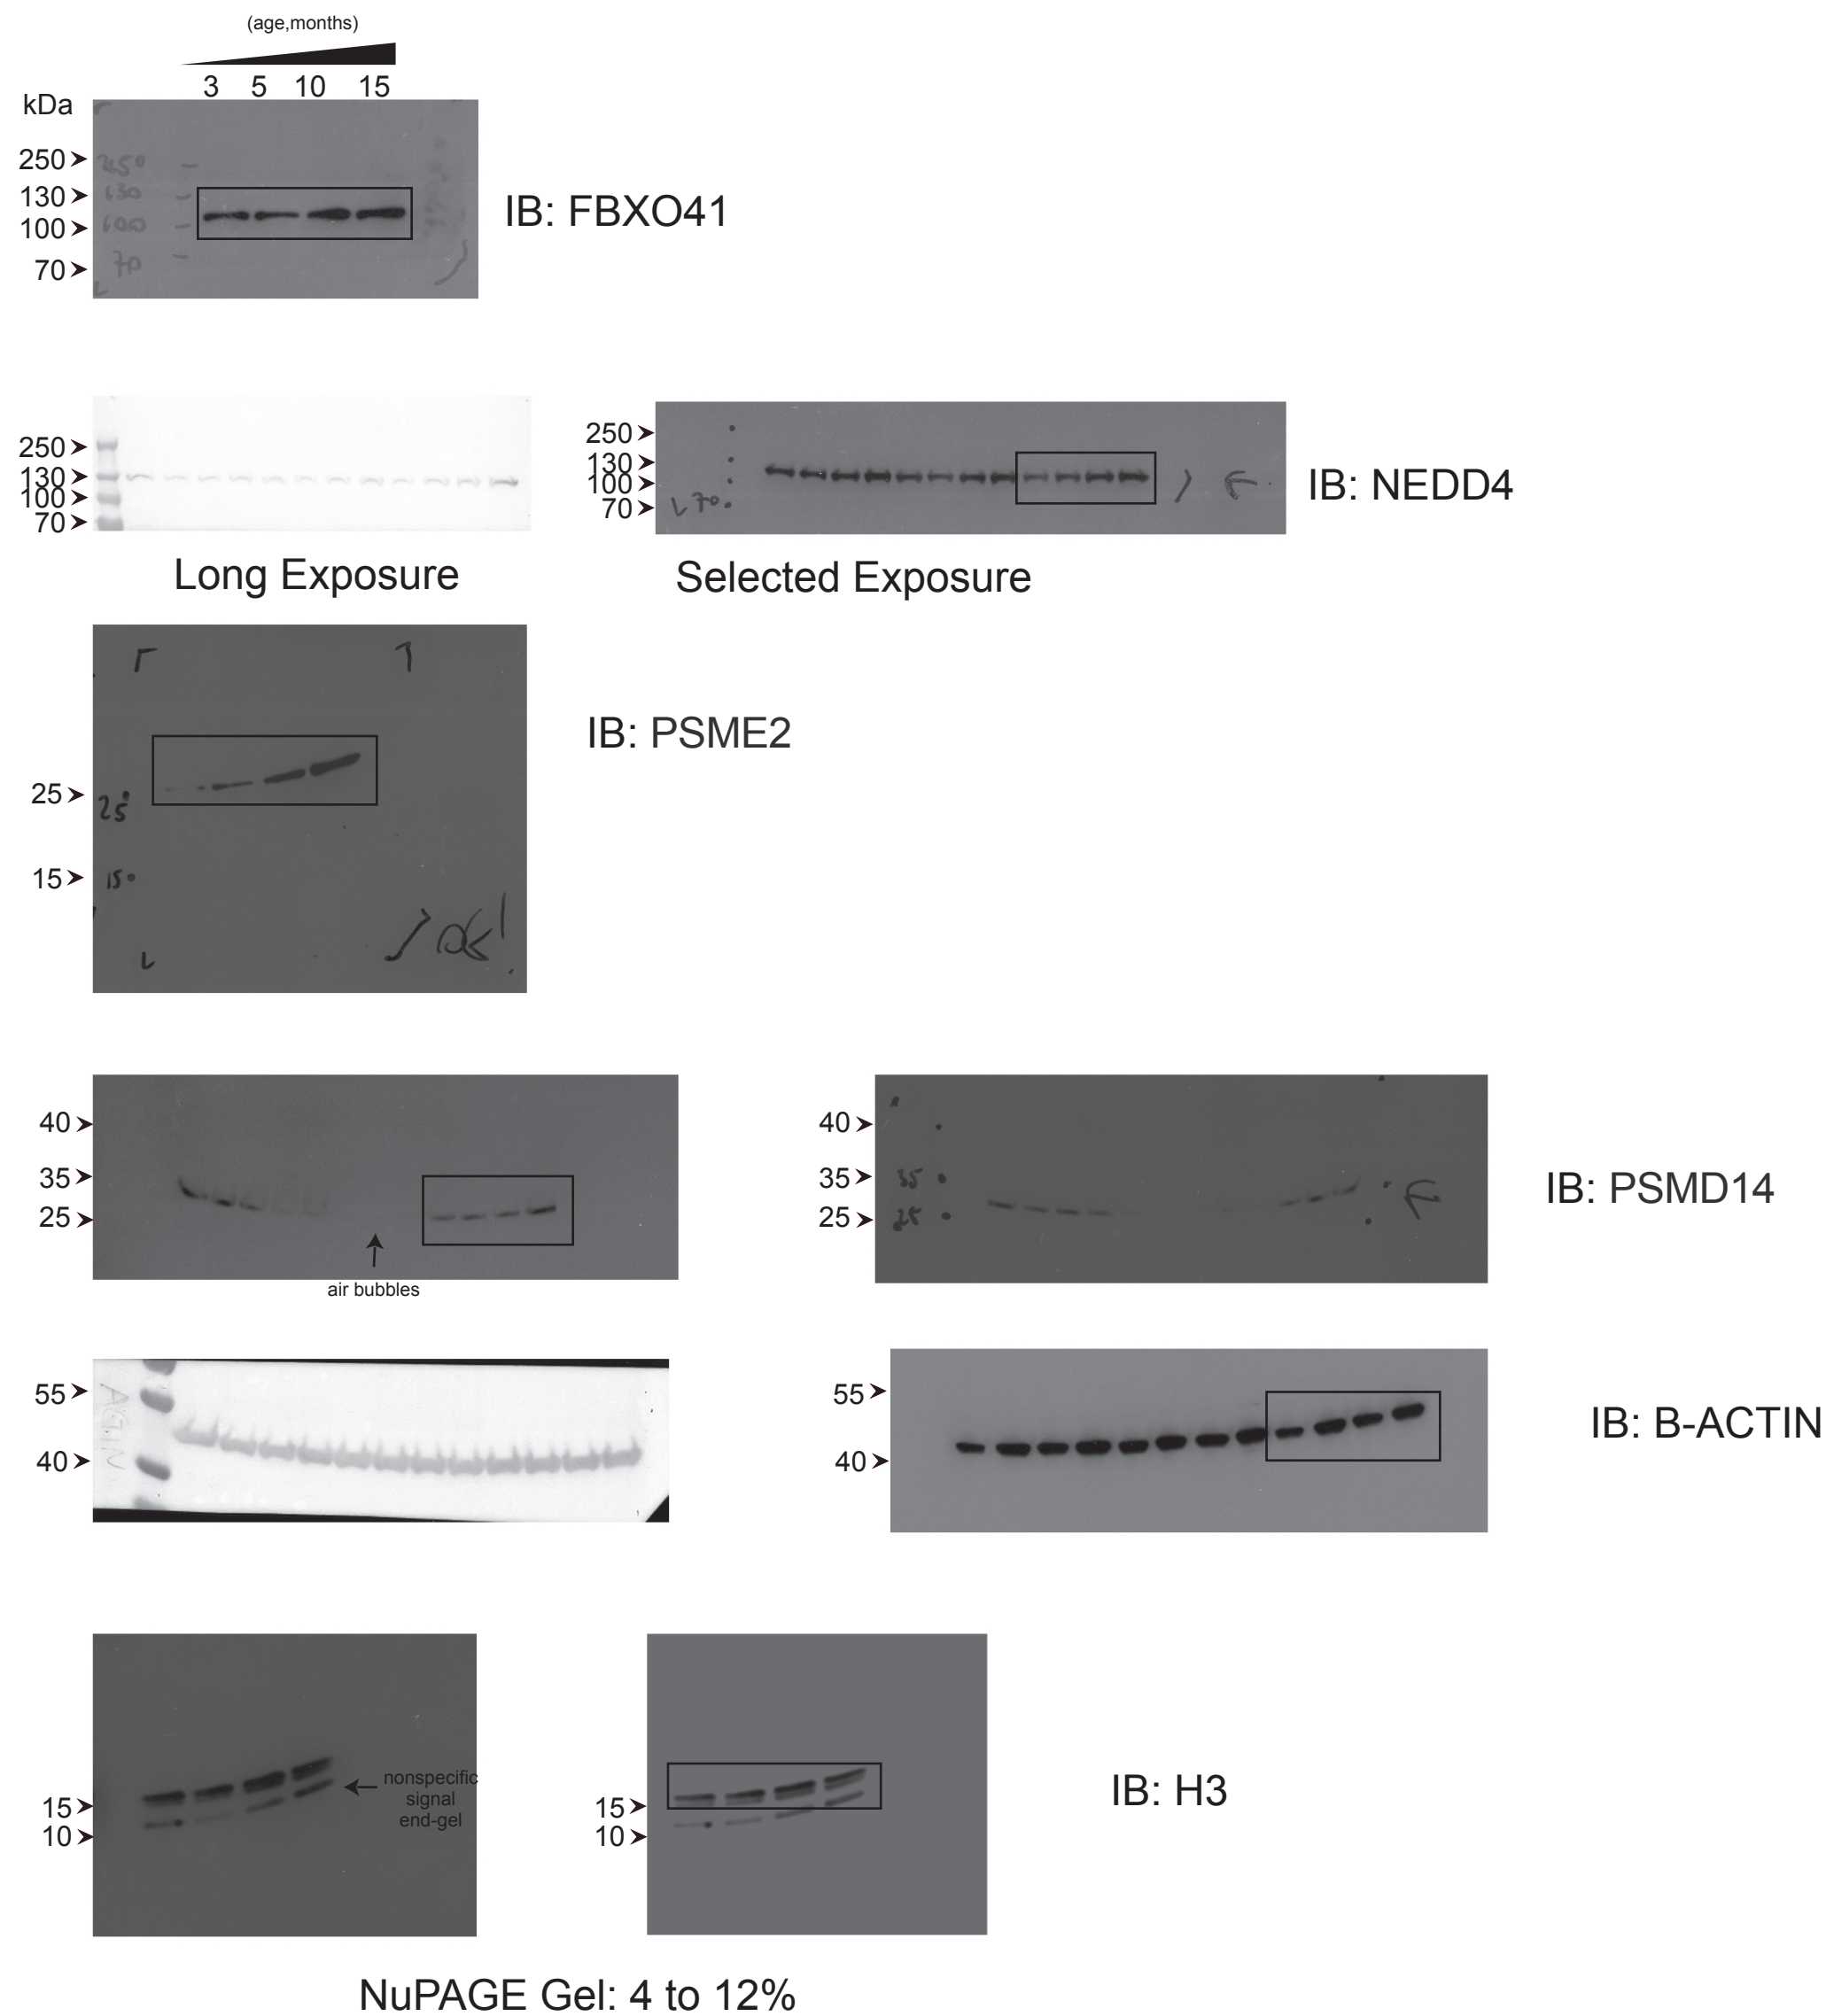

Supplement: supp [file elife-73524-supp-v1.zip › elife_poa_e73524_Figure_7_source_data_3.pdf]

Figure 7- source data 4 - LIVER

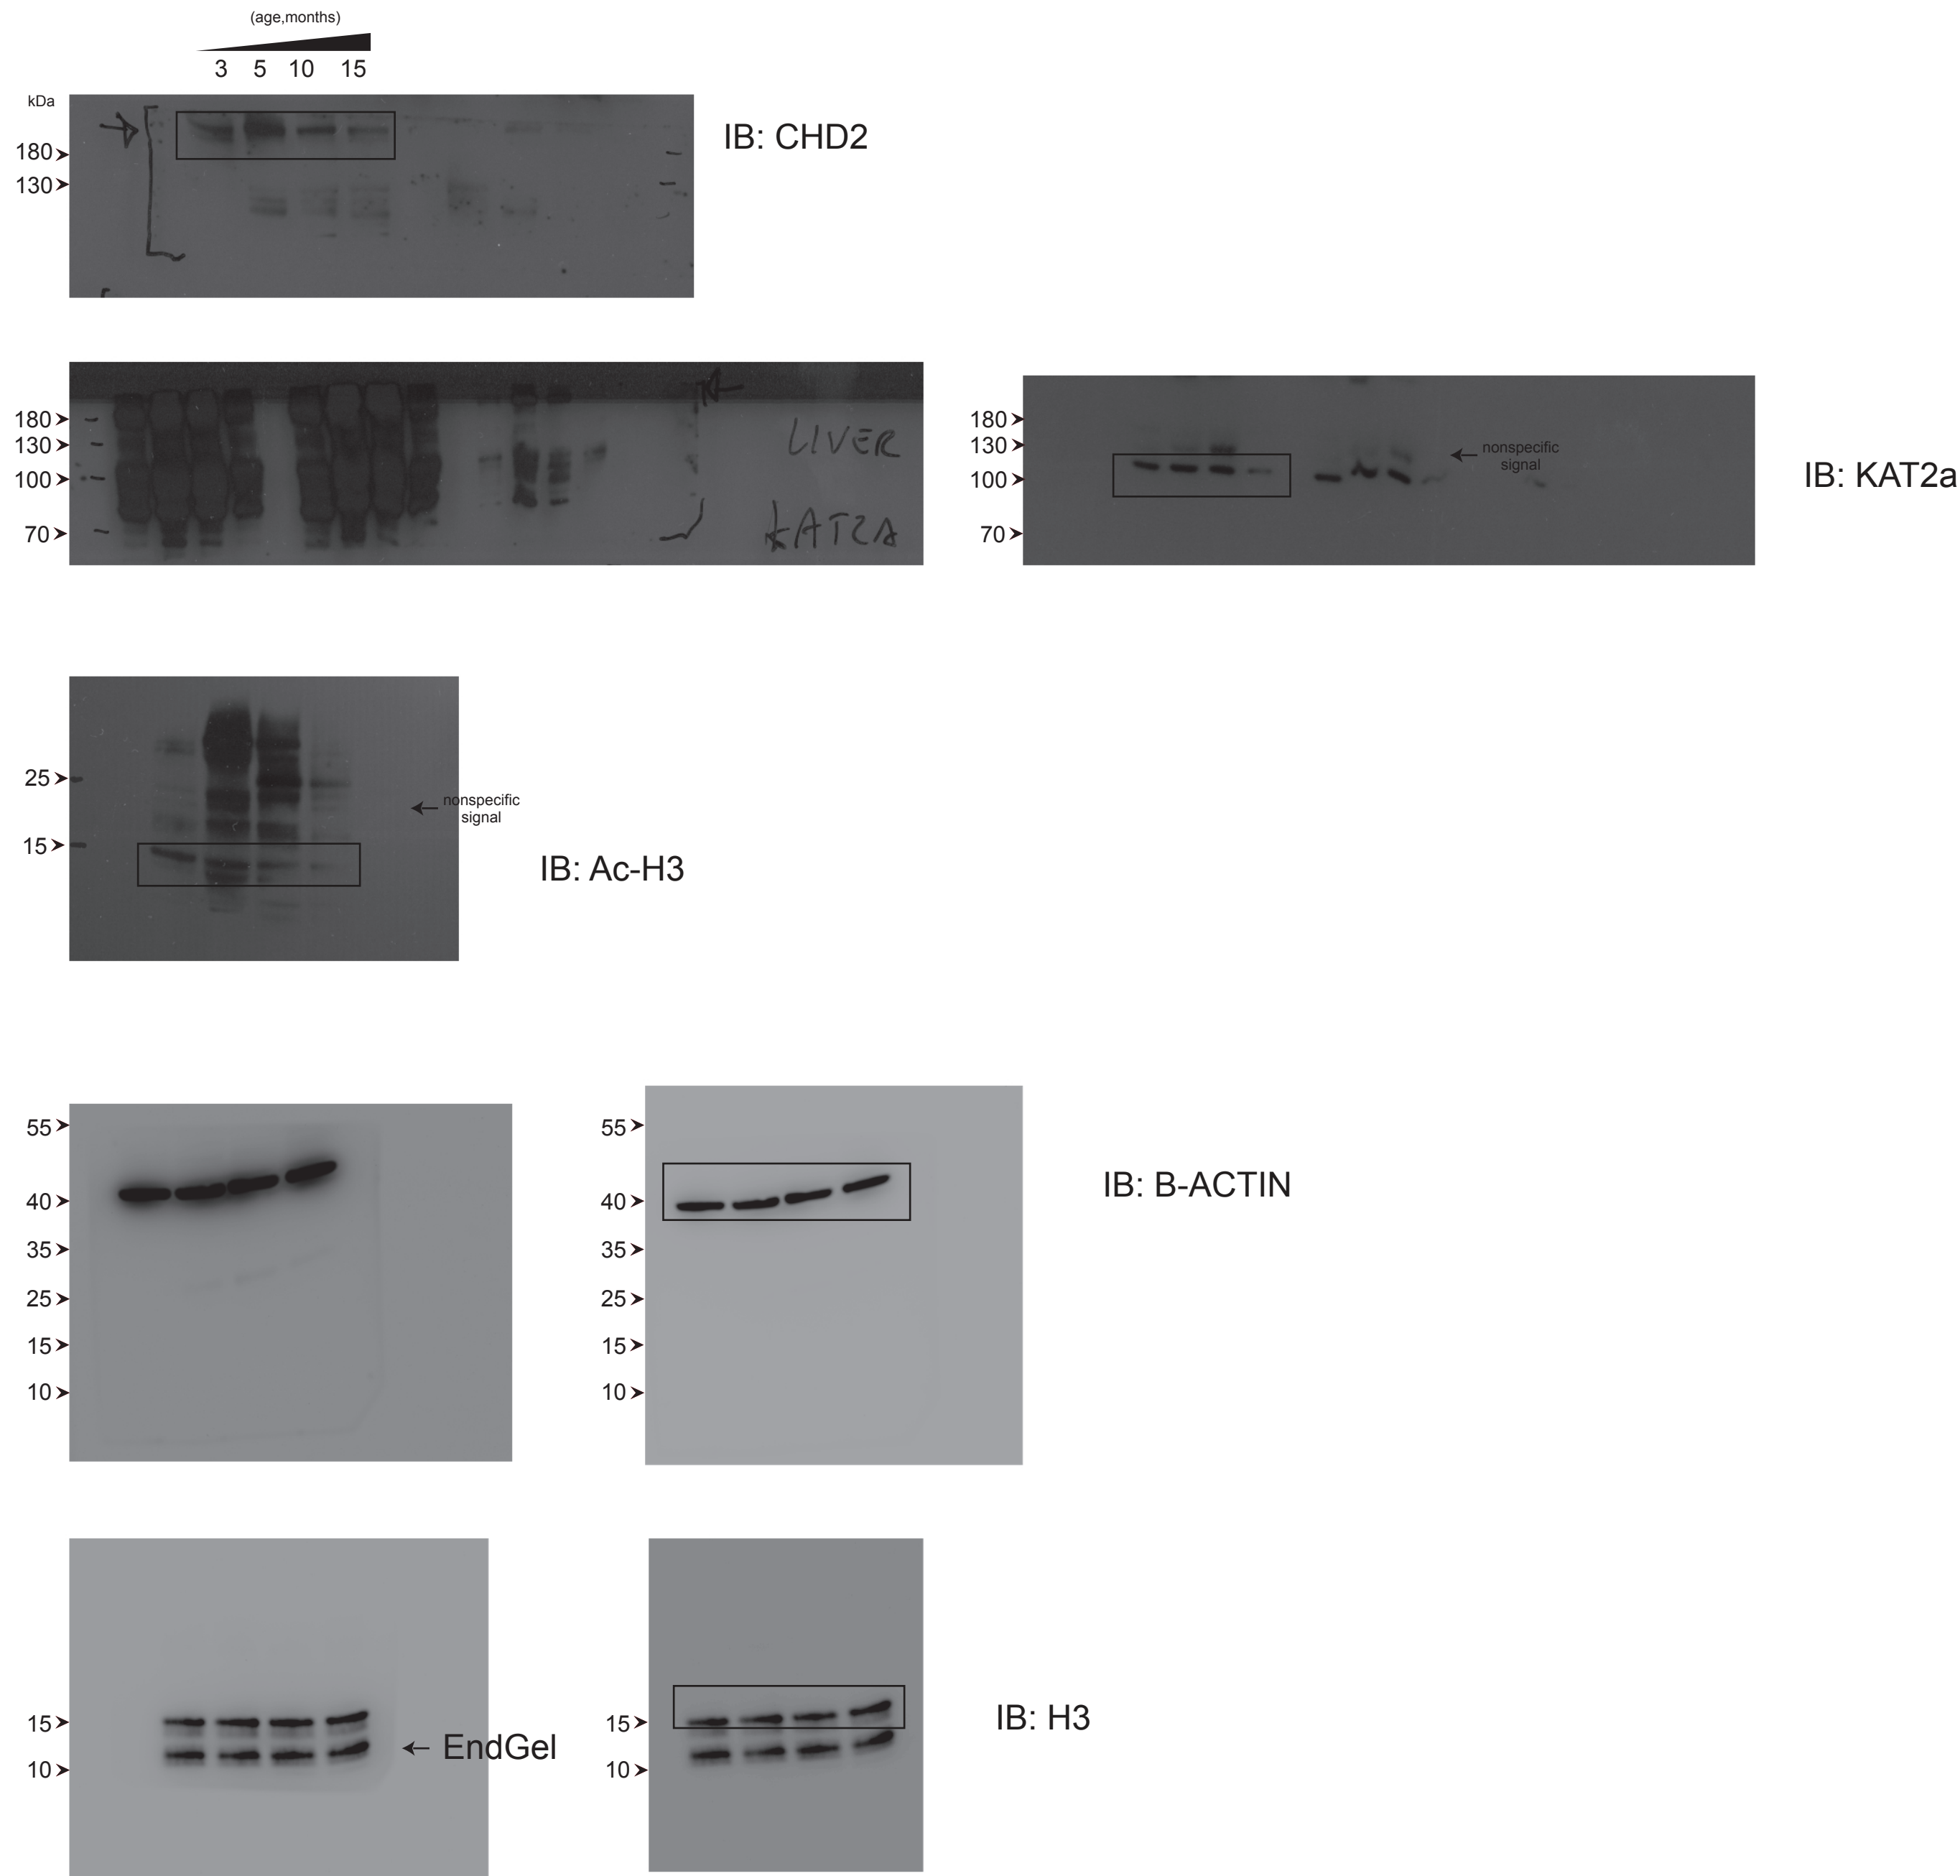

Supplement: supp [file elife-73524-supp-v1.zip › elife_poa_e73524_Figure_7_source_data_4.pdf]

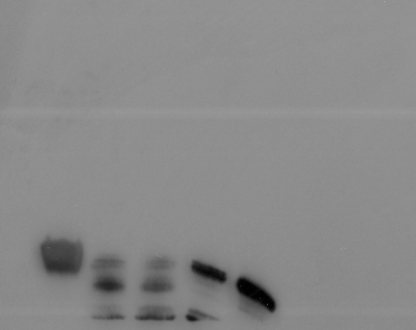

Supplement: supp [file elife-73524-supp-v1.zip]

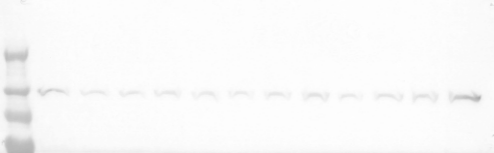

Supplement: supp [file elife-73524-supp-v1.zip]

1

IS

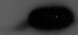

1

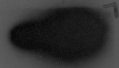

1

H3

1

1

Supplement: supp [file elife-73524-supp-v1.zip]

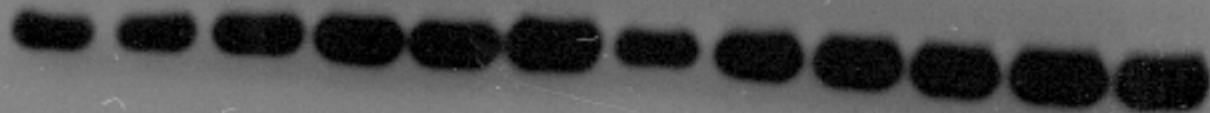

Supplement: supp [file elife-73524-supp-v1.zip]

35

43

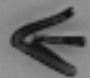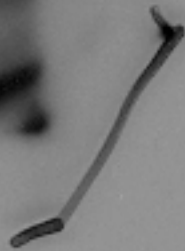

Supplement: supp [file elife-73524-supp-v1.zip]

250

-

130

-

100

-

70

-

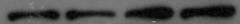

Supplement: supp [file elife-73524-supp-v1.zip]

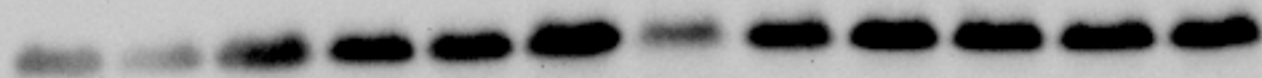

Supplement: supp [file elife-73524-supp-v1.zip]

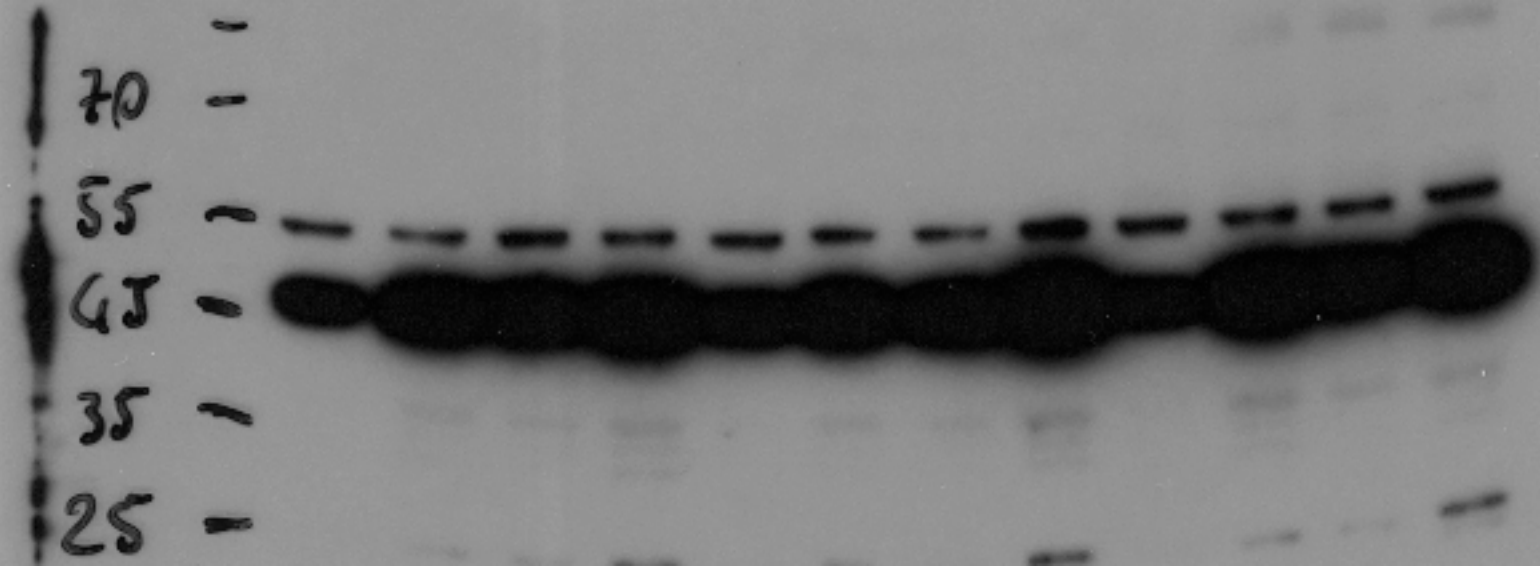

← +12A2.1

≈ 40/42 kDa

Supplement: supp [file elife-73524-supp-v1.zip]

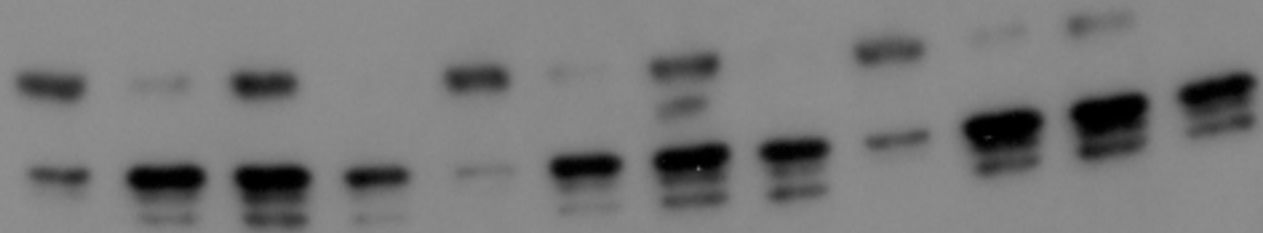

Supplement: supp [file elife-73524-supp-v1.zip]

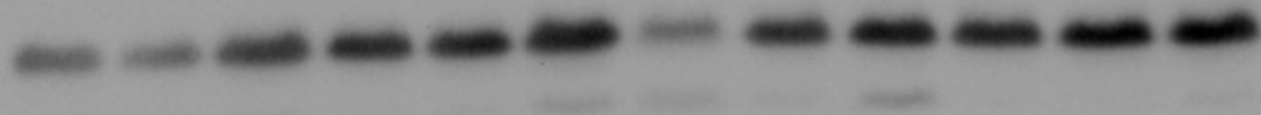

Supplement: supp [file elife-73524-supp-v1.zip]

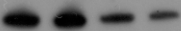

Supplement: supp [file elife-73524-supp-v1.zip]

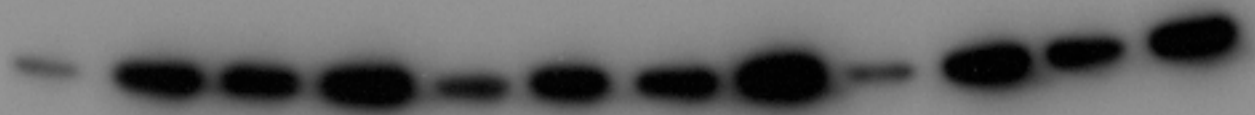

Supplement: supp [file elife-73524-supp-v1.zip]

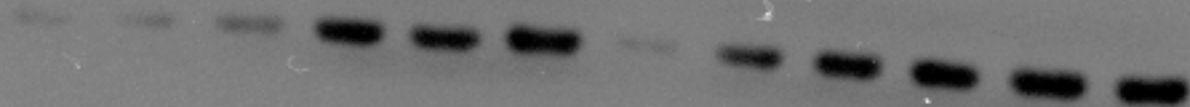

Supplement: supp [file elife-73524-supp-v1.zip]

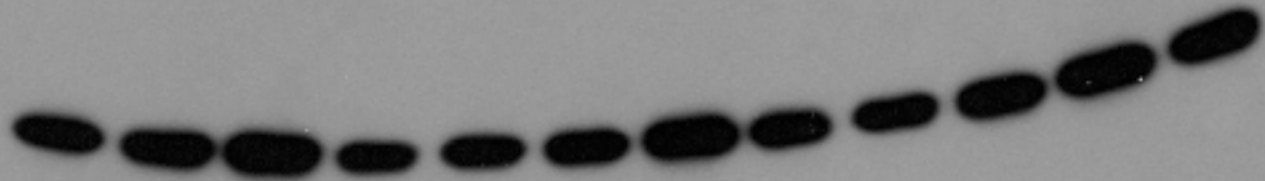

Supplement: supp [file elife-73524-supp-v1.zip]

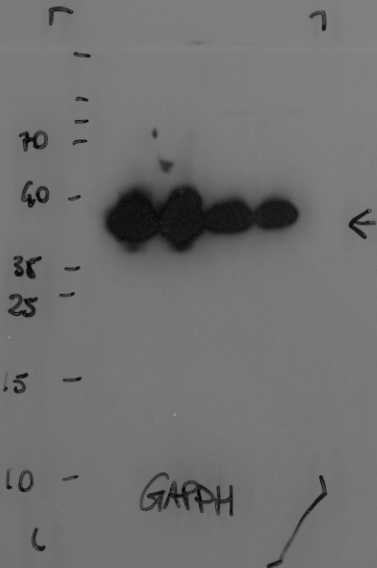

Supplement: supp [file elife-73524-supp-v1.zip]

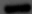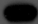

Supplement: supp [file elife-73524-supp-v1.zip]

7

7

25°

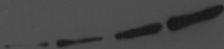

15°

7

7041

Supplement: supp [file elife-73524-supp-v1.zip]

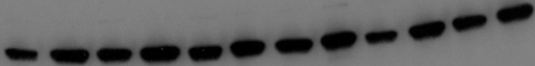

Supplement: supp [file elife-73524-supp-v1.zip]

255-

15 -

10 -

L

H3

7

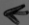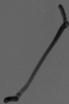

Supplement: supp [file elife-73524-supp-v1.zip]



Supplement: supp [file elife-73524-supp-v1.zip]

55 -

40 -

35 -

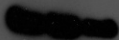

← GAPDH

Supplement: supp [file elife-73524-supp-v1.zip]
